# Supplementary material
Source: PubMed Central journal article supplement (PMC3258857)
Supplement: supp_M801819200_HMW1_CHO_manucript_JBC_suppl_data.pdf [file supp_M801819200_HMW1_CHO_manucript_JBC_suppl_data.pdf]

**Supplemental Figure 1)**

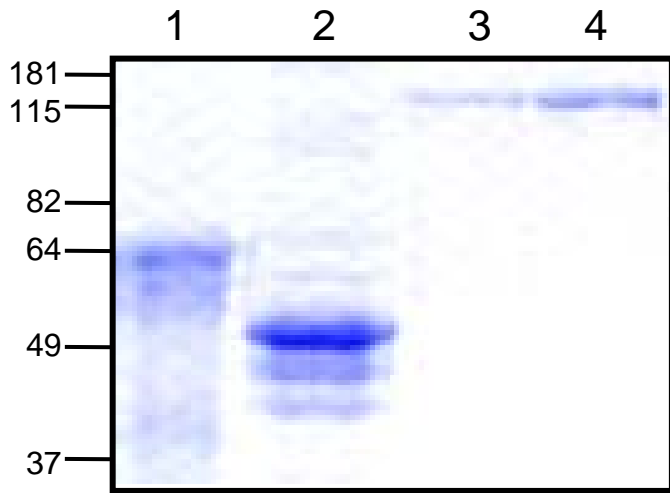

**Supplemental Figure 2A)**

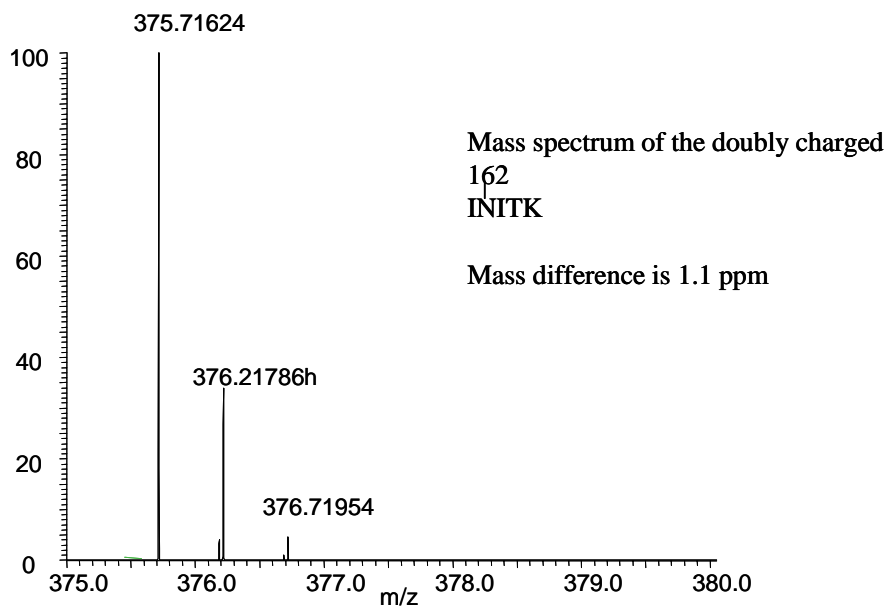

**Supplemental Figure 2B)**

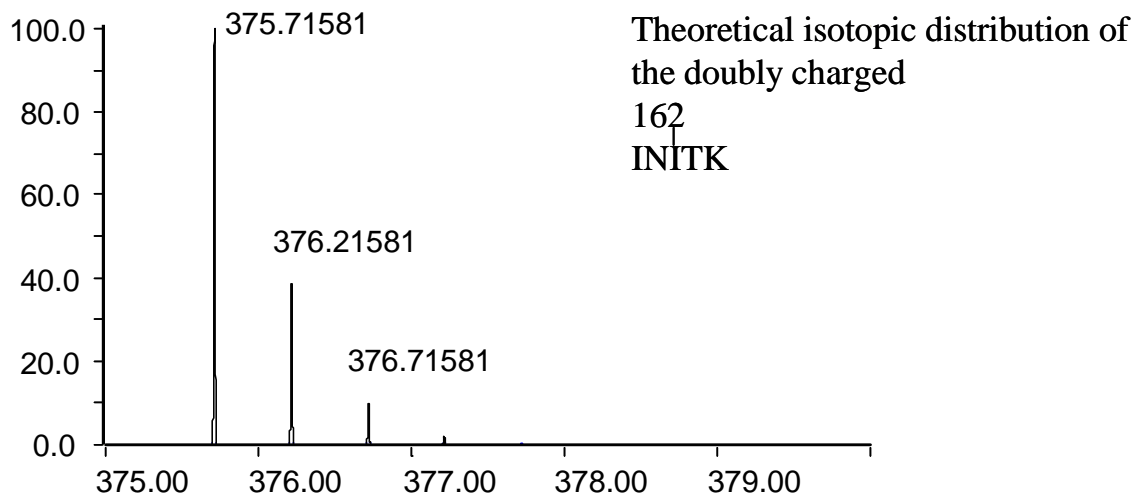

# Supplemental Figure 3)

A)

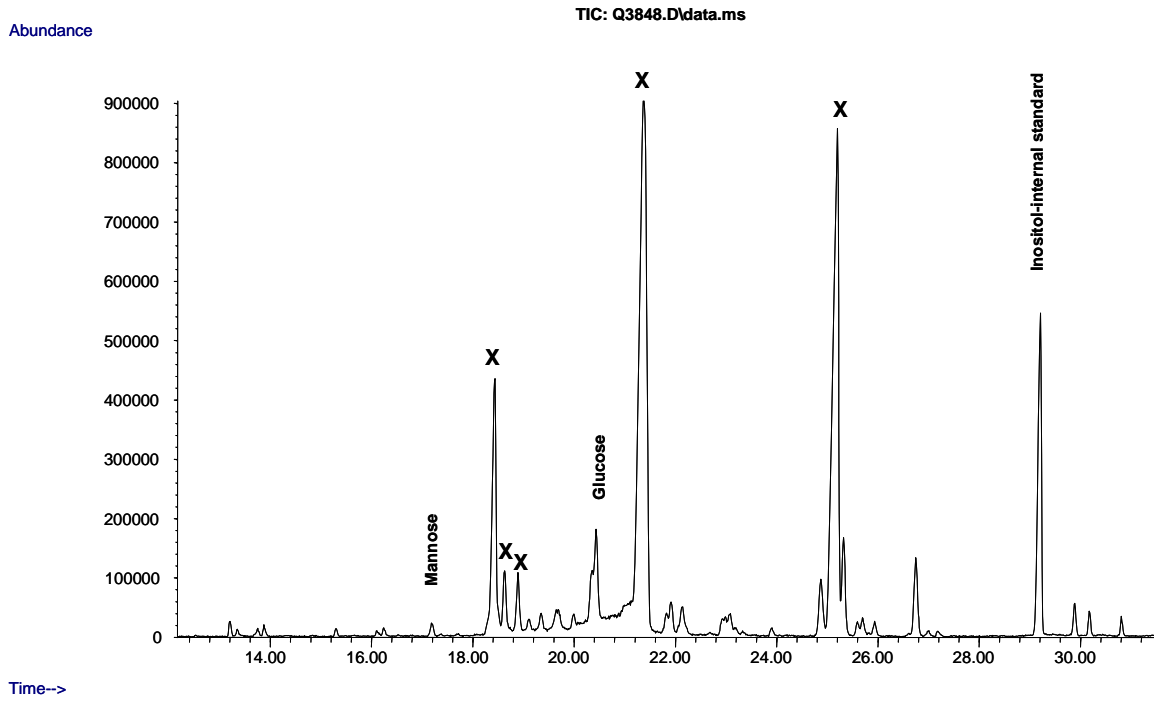

B)

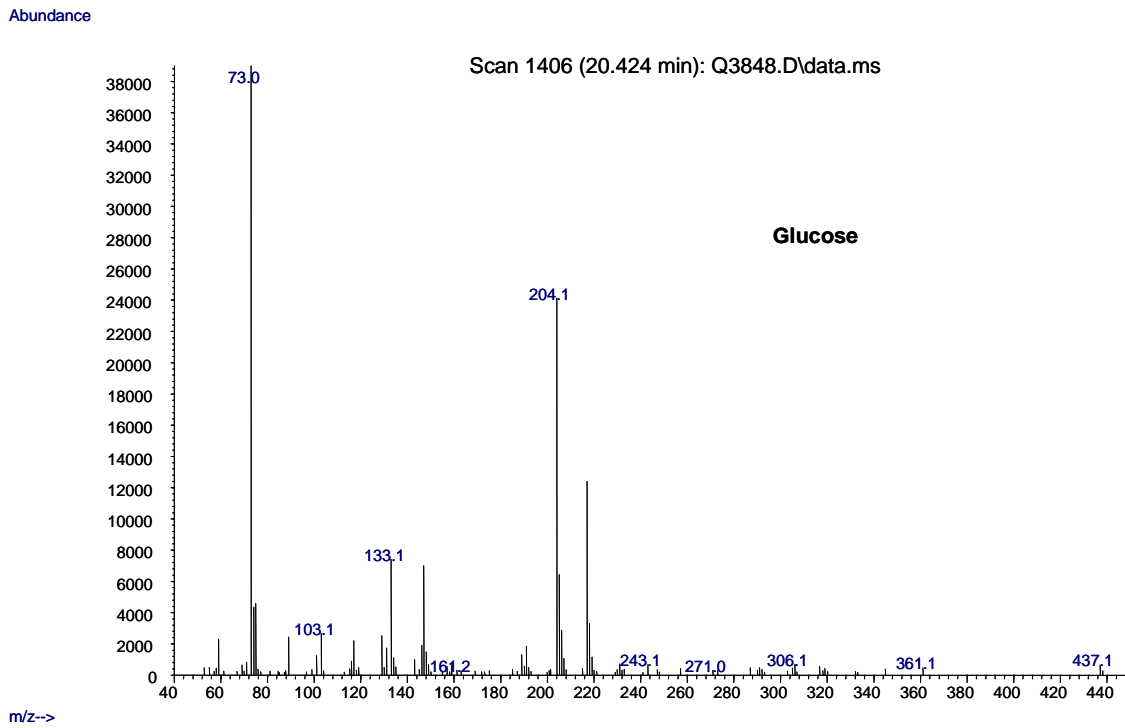

C)

Abundance

Scan 1111 (17.192 min): Q3848.D\data.ms

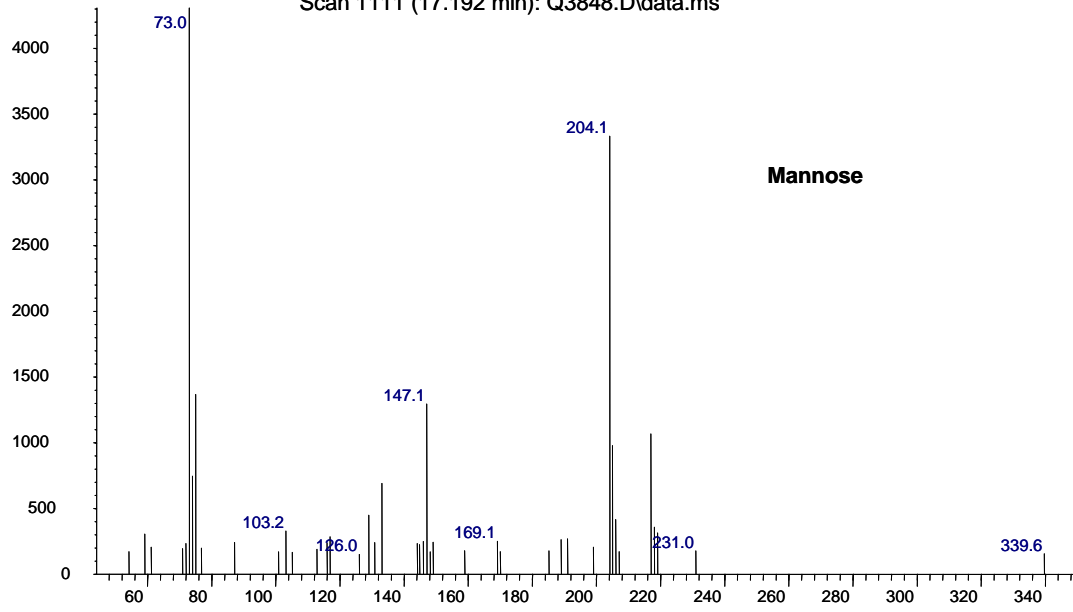

m/z-->

Supplemental Figure 4)

<sup>442</sup> PDVSVSINAETAGRSNTSEDEYTGSGNSASTPKRNKEKTTLT  
TTLESILKKGTFVNITANQRIYVNSSINLSNGSLTLWSEGRSG  
GGVEINNDITTGDDTRGANLTIYSGGWVDVHKISLGAQGN  
ITAKQDIAFEKGSNQVITGQGTITSGNQKGFRENNSLNGT  
GSGLQFTTKRTNKYAITNKFEGTLNISGKVISMVLPKNESG  
YDKFKGRTYWNLTSLNSESGEFNLTIDSRGSDSAGTLTQPY  
NLNGISFNKDITFVERNARVNFDIKAPIGINKYSSLN<sup>Y</sup>ASEN  
GNISVSGGGSVDFTLASSNVOTPGVVINSKYFVSTGSSLRF  
KTSGSTKTGFSIEKDLTATGGITLLQVEGTDGMIGKGIV  
AKKITFEGGNITFGSRKAVTEIEGNVTINNANVTLIGSDFD  
NHQPLTIKDVINSNLTAGGNIVNIAGNLTVESNANFKAI  
TFTFNVGGLEFDNKGNSISIAKGGARFKDIDNSKLSITNSS  
STYRTHSGNITNKNGLDITNEGSDTEMQIGGDVSQKEGNLT  
ISSDKINITKQITIKAGVDGENSDSDATNNA<sup>N</sup>LTIKTKELKLTQ  
DLISGFNKA<sup>E</sup>ITAKDGSDLTIGNTNSADGTNAKKVTFNQVK  
DSKISADGHKVTLH<sup>S</sup>KVETSGSNNNTEDSSDNNAGLTIDAKN  
VTVNNITSHKAVSISATSGEITTKTGTTIATTGNVEITAQTG  
SILGGIESSGSVTLTATEGALAVSNISGNTVTVTANS<sup>G</sup>ALTTL  
AGSTIKGTESVTTSSQSGDIGGTISGGTVEVKATESLTTQSNS  
KIKATTGEANVTSATGTIGGTISGNTVNVTANAGDLTVGNGA  
EINATEGAATLTTSSGKLTTEASSHITSAGQVNL<sup>S</sup>AQDGSVA  
GSINAAVTLTTGTLTTVKGSN<sup>I</sup>ATSGTLVINAKDAELNGA  
ALGNHTVVNATNANGSGSVIATSSRVNITGDLITINGLNIISK  
NGINTVLLKGVKIDVKYIQPGIASVDEVIEAKRILEKVKDLS  
EEREALAKLGVSAVRFIEPNNTITVDTQNEFATRPLSRIVISEG  
RACFSNSDGATVCVNIADNGR

## Supplemental Figure 5)

The following figures show all MS/MS spectra that carry at least one 162 modification. To indicate the location of the modification the amino acid carrying the modification has been underlined in the case of a single modification, and underlined and put in bold for a double modification. In addition tables listing the theoretical fragment ion masses (calculated with MS-Product in ProteinProspector version 4.27.2 basic) are shown.

Please note that these tables do not contain fragment ion masses involving neutral losses. The Roepstorff nomenclature for peptide fragment ions is used (a-, b-, y-ions with or without water/ammonia loss). Internal fragment ions are shown and a charge state up to +3 is considered. One hexose modification on an Asn site is defined as “u” in the sequence and has the elemental composition of C<sub>10</sub> H<sub>16</sub> N<sub>2</sub> O<sub>7</sub>. Two hexose modifications on one Asn site are defined as “v” (C<sub>16</sub> H<sub>26</sub> N<sub>2</sub> O<sub>12</sub>).

The order of peptides is the same as in Table 1 in the published article.

### PDNVSINAETAGR

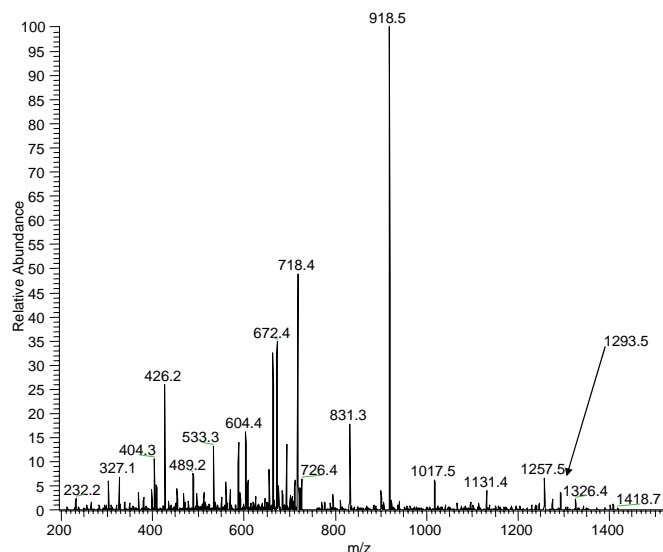

|                    |                                                             |                     |                                                  |       |                                     |       |                               |       |                                     |
|--------------------|-------------------------------------------------------------|---------------------|--------------------------------------------------|-------|-------------------------------------|-------|-------------------------------|-------|-------------------------------------|
| 60.0               | <b>S</b>                                                    | 284.1               | <b>ETA-H<sub>2</sub>O</b>                        | 463.2 | <b>uVS</b>                          | 663.3 | <b>DuVSI-28</b>               | 928.4 | <b>a<sub>8</sub>-NH<sub>3</sub></b> |
| 70.1               | <b>P</b>                                                    | 286.2               | <b>y<sub>3</sub>-NH<sub>3</sub></b>              | 463.2 | <b>DuV-28</b>                       | 669.3 | <b>SINAETA-H<sub>2</sub>O</b> | 945.5 | <b>a<sub>8</sub></b>                |
| 70.1               | <b>R</b>                                                    | 287.1               | <b>NAE-28</b>                                    | 467.3 | <b>VSINA-H<sub>2</sub>O</b>         | 670.3 | <b>SINAETA-NH<sub>3</sub></b> | 955.4 | <b>b<sub>8</sub>-H<sub>2</sub>O</b> |
| 72.1               | <b>V</b>                                                    | 287.2               | <b>SIN-28</b>                                    | 468.2 | <b>VSINA-NH<sub>3</sub></b>         | 672.3 | <b>uVSIN-H<sub>2</sub>O</b>   | 956.4 | <b>b<sub>8</sub>-NH<sub>3</sub></b> |
| 74.1               | <b>T</b>                                                    | 293.7 <sup>+2</sup> | <b>y<sub>6</sub>-H<sub>2</sub>O<sup>+2</sup></b> | 469.2 | <b>NAETA-H<sub>2</sub>O</b>         | 673.3 | <b>DuVSI-H<sub>2</sub>O</b>   | 963.5 | <b>uVSINAET-28</b>                  |
| 79.5 <sup>+2</sup> | <b>y<sub>1</sub>-NH<sub>3</sub><sup>+</sup><sub>2</sub></b> | 294.1 <sup>+2</sup> | <b>y<sub>6</sub>-NH<sub>3</sub><sup>+2</sup></b> | 470.2 | <b>NAETA-NH<sub>3</sub></b>         | 673.3 | <b>uVSIN-NH<sub>3</sub></b>   | 973.4 | <b>uVSINAET-H<sub>2</sub>O</b>      |
| 86.1               | <b>I</b>                                                    | 297.1               | <b>NAE-H<sub>2</sub>O</b>                        | 471.2 | <b>b<sub>3</sub>-H<sub>2</sub>O</b> | 675.3 | <b>b<sub>5</sub></b>          | 973.4 | <b>b<sub>8</sub></b>                |
| 87.1               | <b>N</b>                                                    | 297.2               | <b>SIN-H<sub>2</sub>O</b>                        | 473.2 | <b>DuV-H<sub>2</sub>O</b>           | 687.3 | <b>SINAETA</b>                | 974.4 | <b>uVSINAET-NH<sub>3</sub></b>      |

|                            |                                                                        |                     |                                                |                     |                                                 |                            |                                                 |        |                                   |
|----------------------------|------------------------------------------------------------------------|---------------------|------------------------------------------------|---------------------|-------------------------------------------------|----------------------------|-------------------------------------------------|--------|-----------------------------------|
| 87.1                       | R                                                                      | 298.1               | NAE-NH <sub>3</sub>                            | 485.3               | VSINA                                           | 687.4                      | VSINAET-28                                      | 977.4  | DuVSINAE-28                       |
| 88.0                       | D                                                                      | 298.1               | SIN-NH <sub>3</sub>                            | 487.2               | NAETA                                           | 690.3                      | uVSIN                                           | 987.4  | DuVSINAE-H <sub>2</sub> O         |
| 88.1 <sup>+2</sup>         | y <sub>1</sub> <sup>+2</sup>                                           | 299.2               | INA                                            | 487.3               | SINAE-28                                        | 691.3                      | DuVSI                                           | 988.4  | DuVSINAE-NH <sub>3</sub>          |
| 100.1                      | R                                                                      | 300.2               | VSI                                            | 489.2               | b <sub>3</sub>                                  | 695.8 <sup>+2</sup>        | y <sub>12</sub> -H <sub>2</sub> O <sup>+2</sup> | 991.5  | uVSINAET                          |
| 101.1                      | AG-28                                                                  | 302.1               | ETA                                            | 491.2               | DuV                                             | 696.3 <sup>+2</sup>        | y <sub>12</sub> -NH <sub>3</sub> <sup>+2</sup>  | 999.5  | y <sub>10</sub> -H <sub>2</sub> O |
| 102.1                      | E                                                                      | 302.1               | AET                                            | 497.2               | SINAE-H <sub>2</sub> O                          | 697.4                      | VSINAET-H <sub>2</sub> O                        | 1000.5 | y <sub>10</sub> -NH <sub>3</sub>  |
| 108.1 <sup>+2</sup>        | y <sub>2</sub> <sup>-</sup> -NH <sub>3</sub> <sup>+</sup> <sub>2</sub> | 302.7 <sup>+2</sup> | y <sub>6</sub> <sup>+2</sup>                   | 498.2               | SINAE-NH <sub>3</sub>                           | 698.3                      | VSINAET-NH <sub>3</sub>                         | 1005.4 | DuVSINAE                          |
| 112.1                      | R                                                                      | 303.2               | y <sub>3</sub>                                 | 500.3 <sup>+2</sup> | y <sub>10</sub> -H <sub>2</sub> O <sup>+2</sup> | 700.3                      | y <sub>7</sub> -H <sub>2</sub> O                | 1017.5 | y <sub>10</sub>                   |
| 116.57<br>38 <sup>+2</sup> | y <sub>2</sub> <sup>+2</sup>                                           | 315.1               | NAE                                            | 500.8 <sup>+2</sup> | y <sub>10</sub> -NH <sub>3</sub> <sup>+2</sup>  | 701.3                      | y <sub>7</sub> -NH <sub>3</sub>                 | 1034.5 | uVSINAETA-28                      |
| 126.1                      | P                                                                      | 315.2               | SIN                                            | 501.3               | INAET-28                                        | 704.83<br>12 <sup>+2</sup> | y <sub>12</sub> <sup>+2</sup>                   | 1044.5 | uVSINAETA-H <sub>2</sub> O        |
| 129.1                      | AG                                                                     | 331.2               | ETAG-28                                        | 509.3 <sup>+2</sup> | y <sub>10</sub> <sup>+2</sup>                   | 715.4                      | VSINAET                                         | 1045.5 | uVSINAETA-NH <sub>3</sub>         |
| 143.6 <sup>+2</sup>        | y <sub>3</sub> <sup>-</sup> -NH <sub>3</sub> <sup>+</sup> <sub>2</sub> | 341.1               | ETAG-H <sub>2</sub> O                          | 511.3               | INAET-H <sub>2</sub> O                          | 716.4                      | SINAETAG-28                                     | 1057.5 | a <sub>9</sub> -NH <sub>3</sub>   |
| 145.1                      | TA-28                                                                  | 345.2               | AETA-28                                        | 512.2               | INAET-NH <sub>3</sub>                           | 718.3                      | y <sub>7</sub>                                  | 1062.5 | uVSINAETA                         |
| 152.1 <sup>+2</sup>        | y <sub>3</sub> <sup>+2</sup>                                           | 348.2               | uV-28                                          | 515.2               | SINAE                                           | 726.3                      | SINAETAG-H <sub>2</sub> O                       | 1074.5 | a <sub>9</sub>                    |
| 155.1                      | TA-H <sub>2</sub> O                                                    | 350.7 <sup>+2</sup> | y <sub>7</sub> -H <sub>2</sub> O <sup>+2</sup> | 515.3               | y <sub>5</sub> -H <sub>2</sub> O                | 727.3                      | SINAETAG-NH <sub>3</sub>                        | 1078.5 | DuVSINAET-28                      |
| 158.1                      | NA-28                                                                  | 351.2 <sup>+2</sup> | y <sub>7</sub> -NH <sub>3</sub> <sup>+2</sup>  | 516.2               | NAETAG-28                                       | 733.4                      | uVSINA-28                                       | 1084.5 | b <sub>9</sub> -H <sub>2</sub> O  |
| 158.1                      | y <sub>1</sub> <sup>-</sup> -NH <sub>3</sub>                           | 355.2               | AETA-H <sub>2</sub> O                          | 516.2               | y <sub>5</sub> -NH <sub>3</sub>                 | 743.4                      | uVSINA-H <sub>2</sub> O                         | 1085.5 | b <sub>9</sub> -NH <sub>3</sub>   |
| 159.1                      | VS-28                                                                  | 358.2               | SINA-28                                        | 526.2               | NAETAG-H <sub>2</sub> O                         | 744.3                      | uVSINA-NH <sub>3</sub>                          | 1088.5 | DuVSINAET-H <sub>2</sub> O        |
| 169.1                      | NA-NH <sub>3</sub>                                                     | 359.2               | ETAG                                           | 527.2               | NAETAG-NH <sub>3</sub>                          | 744.4                      | SINAETAG                                        | 1089.5 | DuVSINAET-NH <sub>3</sub>         |
| 169.1                      | VS-H <sub>2</sub> O                                                    | 359.7 <sup>+2</sup> | y <sub>7</sub> <sup>+2</sup>                   | 529.3               | INAET                                           | 744.4 <sup>+2</sup>        | MH-H <sub>2</sub> O <sup>+2</sup>               | 1091.5 | uVSINAETAG-28                     |
| 173.1                      | AE-28                                                                  | 364.1               | Du-28                                          | 533.3               | y <sub>5</sub>                                  | 744.8 <sup>+2</sup>        | MH-NH <sub>3</sub> <sup>+2</sup>                | 1101.5 | uVSINAETAG-H <sub>2</sub> O       |
| 173.1                      | TA                                                                     | 368.2               | SINA-H <sub>2</sub> O                          | 544.2               | NAETAG                                          | 753.4 <sup>+2</sup>        | MH <sup>+2</sup>                                | 1102.5 | uVSINAETAG-NH <sub>3</sub>        |
| 173.1                      | SI-28                                                                  | 369.2               | SINA-NH <sub>3</sub>                           | 548.3               | uVSI-28                                         | 758.4                      | VSINAETA-28                                     | 1102.5 | b <sub>9</sub>                    |
| 175.1                      | y <sub>1</sub>                                                         | 373.2               | AETA                                           | 550.2               | DuVS-28                                         | 760.4                      | a <sub>6</sub>                                  | 1106.5 | DuVSINAET                         |
| 183.1                      | AE-H <sub>2</sub> O                                                    | 374.1               | Du-H <sub>2</sub> O                            | 558.3               | uVSI-H <sub>2</sub> O                           | 761.4                      | uVSINA                                          | 1119.5 | uVSINAETAG                        |
| 183.1                      | SI-H <sub>2</sub> O                                                    | 376.2               | uV                                             | 560.2               | DuVS-H <sub>2</sub> O                           | 768.4                      | VSINAETA-H <sub>2</sub> O                       | 1149.5 | DuVSINAETA-28                     |

|                     |                                                                         |                     |                                                  |                     |                                                   |       |                                     |        |                                      |
|---------------------|-------------------------------------------------------------------------|---------------------|--------------------------------------------------|---------------------|---------------------------------------------------|-------|-------------------------------------|--------|--------------------------------------|
| 185.1               | <b>a<sub>2</sub></b>                                                    | 386.2               | <b>SINA</b>                                      | 560.3               | <b>a<sub>4</sub></b>                              | 769.4 | <b>VSINAETA-NH<sub>3</sub></b>      | 1158.5 | <b>a<sub>10</sub>-NH<sub>3</sub></b> |
| 186.1               | <b>NA</b>                                                               | 386.2               | <b>y<sub>4</sub>-H<sub>2</sub>O</b>              | 570.2               | <b>b<sub>4</sub>-H<sub>2</sub>O</b>               | 770.4 | <b>b<sub>6</sub>-H<sub>2</sub>O</b> | 1159.5 | <b>DuVSINAETA-H<sub>2</sub>O</b>     |
| 187.1               | <b>VS</b>                                                               | 386.2               | <b>VSIN-28</b>                                   | 572.3               | <b>INAETA-28</b>                                  | 777.4 | <b>DuVSIN-28</b>                    | 1160.5 | <b>DuVSINAETA-NH<sub>3</sub></b>     |
| 193.6 <sup>+2</sup> | <b>y<sub>4</sub><sup>-</sup>-H<sub>2</sub>O<sup>+</sup><sub>2</sub></b> | 387.2               | <b>y<sub>4</sub>-NH<sub>3</sub></b>              | 576.3               | <b>uVSI</b>                                       | 786.4 | <b>VSINAETA</b>                     | 1175.5 | <b>a<sub>10</sub></b>                |
| 194.1 <sup>+2</sup> | <b>y<sub>4</sub><sup>-</sup>-NH<sub>3</sub><sup>+</sup><sub>2</sub></b> | 388.2               | <b>NAET-28</b>                                   | 578.2               | <b>DuVS</b>                                       | 787.3 | <b>DuVSIN-H<sub>2</sub>O</b>        | 1177.5 | <b>DuVSINAETA</b>                    |
| 195.1               | <b>b<sub>2</sub><sup>-</sup>-H<sub>2</sub>O</b>                         | 392.1               | <b>Du</b>                                        | 582.3               | <b>INAETA-H<sub>2</sub>O</b>                      | 788.3 | <b>DuVSIN-NH<sub>3</sub></b>        | 1185.5 | <b>b<sub>10</sub>-H<sub>2</sub>O</b> |
| 200.1               | <b>IN-28</b>                                                            | 396.2               | <b>VSIN-H<sub>2</sub>O</b>                       | 583.3               | <b>INAETA-NH<sub>3</sub></b>                      | 788.4 | <b>b<sub>6</sub></b>                | 1186.5 | <b>b<sub>10</sub>-NH<sub>3</sub></b> |
| 201.1               | <b>AE</b>                                                               | 397.2               | <b>VSIN-NH<sub>3</sub></b>                       | 586.3               | <b>y<sub>6</sub>-H<sub>2</sub>O</b>               | 805.4 | <b>DuVSIN</b>                       | 1203.5 | <b>b<sub>10</sub></b>                |
| 201.1               | <b>SI</b>                                                               | 398.2               | <b>NAET-H<sub>2</sub>O</b>                       | 586.3               | <b>VSINAE-28</b>                                  | 813.4 | <b>y<sub>8</sub>-H<sub>2</sub>O</b> | 1206.5 | <b>DuVSINAETAG-28</b>                |
| 202.1               | <b>TAG-28</b>                                                           | 399.2               | <b>NAET-NH<sub>3</sub></b>                       | 587.3               | <b>y<sub>6</sub>-NH<sub>3</sub></b>               | 814.4 | <b>y<sub>8</sub>-NH<sub>3</sub></b> | 1216.5 | <b>DuVSINAETAG-H<sub>2</sub>O</b>    |
| 202.6 <sup>+2</sup> | <b>y<sub>4</sub><sup>+2</sup></b>                                       | 400.2               | <b>INAE-28</b>                                   | 588.3               | <b>b<sub>4</sub></b>                              | 815.4 | <b>VSINAETAG-28</b>                 | 1217.5 | <b>DuVSINAETAG-NH<sub>3</sub></b>    |
| 203.1               | <b>ET-28</b>                                                            | 402.2               | <b>AETAG-28</b>                                  | 588.3               | <b>SINAET-28</b>                                  | 825.4 | <b>VSINAETAG-H<sub>2</sub>O</b>     | 1229.6 | <b>a<sub>11</sub>-NH<sub>3</sub></b> |
| 211.1               | <b>IN-NH<sub>3</sub></b>                                                | 404.2               | <b>y<sub>4</sub></b>                             | 596.3               | <b>VSINAE-H<sub>2</sub>O</b>                      | 826.4 | <b>VSINAETAG-NH<sub>3</sub></b>     | 1234.5 | <b>DuVSINAETAG</b>                   |
| 212.1               | <b>TAG-H<sub>2</sub>O</b>                                               | 407.2 <sup>+2</sup> | <b>y<sub>8</sub>-H<sub>2</sub>O<sup>+2</sup></b> | 597.3               | <b>VSINAE-NH<sub>3</sub></b>                      | 831.4 | <b>y<sub>8</sub></b>                | 1246.6 | <b>a<sub>11</sub></b>                |
| 213.1               | <b>ET-H<sub>2</sub>O</b>                                                | 407.7 <sup>+2</sup> | <b>y<sub>8</sub>-NH<sub>3</sub><sup>+2</sup></b> | 598.3               | <b>SINAET-H<sub>2</sub>O</b>                      | 843.4 | <b>VSINAETAG</b>                    | 1256.6 | <b>b<sub>11</sub>-H<sub>2</sub>O</b> |
| 213.1               | <b>b<sub>2</sub></b>                                                    | 410.2               | <b>INAE-H<sub>2</sub>O</b>                       | 599.3               | <b>SINAET-NH<sub>3</sub></b>                      | 848.4 | <b>DuVSINA-28</b>                   | 1257.5 | <b>b<sub>11</sub>-NH<sub>3</sub></b> |
| 215.1               | <b>y<sub>2</sub><sup>-</sup>-NH<sub>3</sub></b>                         | 411.2               | <b>INAE-NH<sub>3</sub></b>                       | 600.3               | <b>INAETA</b>                                     | 857.4 | <b>a<sub>7</sub>-NH<sub>3</sub></b> | 1274.6 | <b>b<sub>11</sub></b>                |
| 228.1               | <b>IN</b>                                                               | 412.2               | <b>AETAG-H<sub>2</sub>O</b>                      | 604.3               | <b>y<sub>6</sub></b>                              | 858.4 | <b>DuVSINA-H<sub>2</sub>O</b>       | 1275.6 | <b>y<sub>11</sub>-H<sub>2</sub>O</b> |
| 230.1               | <b>TAG</b>                                                              | 414.2               | <b>VSIN</b>                                      | 614.3               | <b>VSINAE</b>                                     | 859.4 | <b>DuVSINA-NH<sub>3</sub></b>       | 1276.6 | <b>y<sub>11</sub>-NH<sub>3</sub></b> |
| 231.1               | <b>ET</b>                                                               | 416.2               | <b>NAET</b>                                      | 616.3               | <b>SINAET</b>                                     | 862.4 | <b>uVSINAE-28</b>                   | 1286.6 | <b>a<sub>12</sub>-NH<sub>3</sub></b> |
| 232.1               | <b>y<sub>2</sub></b>                                                    | 416.2 <sup>+2</sup> | <b>y<sub>8</sub><sup>+2</sup></b>                | 629.3               | <b>INAETAG-28</b>                                 | 872.4 | <b>uVSINAE-H<sub>2</sub>O</b>       | 1293.6 | <b>y<sub>11</sub></b>                |
| 258.1 <sup>+2</sup> | <b>y<sub>5</sub><sup>-</sup>-H<sub>2</sub>O<sup>+</sup><sub>2</sub></b> | 428.2               | <b>INAE</b>                                      | 638.3 <sup>+2</sup> | <b>y<sub>11</sub>-H<sub>2</sub>O<sup>+2</sup></b> | 873.4 | <b>uVSINAE-NH<sub>3</sub></b>       | 1303.6 | <b>a<sub>12</sub></b>                |
| 258.6 <sup>+2</sup> | <b>y<sub>5</sub><sup>-</sup>-NH<sub>3</sub><sup>+</sup><sub>2</sub></b> | 430.2               | <b>AETAG</b>                                     | 638.8 <sup>+2</sup> | <b>y<sub>11</sub>-NH<sub>3</sub><sup>+2</sup></b> | 874.4 | <b>a<sub>7</sub></b>                | 1313.6 | <b>b<sub>12</sub>-H<sub>2</sub>O</b> |
| 267.1 <sup>+2</sup> | <b>y<sub>5</sub><sup>+2</sup></b>                                       | 435.2               | <b>uVS-28</b>                                    | 639.3               | <b>INAETAG-H<sub>2</sub>O</b>                     | 876.4 | <b>DuVSINA</b>                      | 1314.6 | <b>b<sub>12</sub>-NH<sub>3</sub></b> |

|       |                      |                     |                                                |                     |                                  |       |                                  |        |                                   |
|-------|----------------------|---------------------|------------------------------------------------|---------------------|----------------------------------|-------|----------------------------------|--------|-----------------------------------|
| 271.2 | INA-28               | 445.2               | uVS-H <sub>2</sub> O                           | 640.3               | INAETAG-NH <sub>3</sub>          | 884.4 | b <sub>7</sub> -H <sub>2</sub> O | 1331.6 | b <sub>12</sub>                   |
| 272.2 | VSI-28               | 450.7 <sup>+2</sup> | y <sub>9</sub> -H <sub>2</sub> O <sup>+2</sup> | 647.3               | a <sub>5</sub>                   | 885.4 | b <sub>7</sub> -NH <sub>3</sub>  | 1390.6 | y <sub>12</sub> -H <sub>2</sub> O |
| 274.1 | ETA-28               | 451.2 <sup>+2</sup> | y <sub>9</sub> -NH <sub>3</sub> <sup>+2</sup>  | 647.3 <sup>+2</sup> | y <sub>11</sub> <sup>+2</sup>    | 890.4 | uVSINAE                          | 1391.6 | y <sub>12</sub> -NH <sub>3</sub>  |
| 274.1 | AET-28               | 457.3               | VSINA-28                                       | 657.3               | b <sub>5</sub> -H <sub>2</sub> O | 900.5 | y <sub>9</sub> -H <sub>2</sub> O | 1408.7 | y <sub>12</sub>                   |
| 282.1 | INA-NH <sub>3</sub>  | 459.2               | NAETA-28                                       | 657.3               | INAETAG                          | 901.4 | y <sub>9</sub> -NH <sub>3</sub>  | 1487.7 | MH-H <sub>2</sub> O               |
| 282.2 | VSI-H <sub>2</sub> O | 459.7 <sup>+2</sup> | y <sub>9</sub> <sup>+2</sup>                   | 659.3               | SINAETA-28                       | 902.4 | b <sub>7</sub>                   | 1488.7 | MH-NH <sub>3</sub>                |
| 284.1 | AET-H <sub>2</sub> O | 461.2               | a <sub>3</sub>                                 | 662.3               | uVSIN-28                         | 918.5 | y <sub>9</sub>                   | 1505.7 | MH                                |

## TTLTNTTLESILK

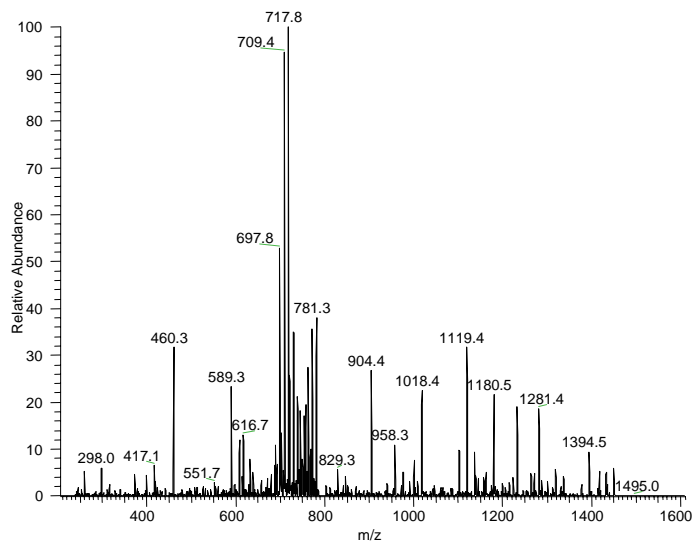

|                    |                                               |       |                      |       |                         |                     |                                                 |        |                           |
|--------------------|-----------------------------------------------|-------|----------------------|-------|-------------------------|---------------------|-------------------------------------------------|--------|---------------------------|
| 60.0               | S                                             | 298.2 | TTL-H <sub>2</sub> O | 479.2 | uTT                     | 693.3               | LTuTT                                           | 1004.5 | LTuTTLES-H <sub>2</sub> O |
| 65.6 <sup>+2</sup> | y <sub>1</sub> -NH <sub>3</sub> <sup>+2</sup> | 302.2 | ESI-28               | 479.2 | TuT                     | 697.9 <sup>+2</sup> | y <sub>11</sub> <sup>+2</sup>                   | 1006.5 | uTTLESIL-28               |
| 74.1               | T                                             | 302.2 | LES-28               | 491.2 | LTu                     | 702.4               | y <sub>6</sub>                                  | 1008.5 | b <sub>8</sub>            |
| 74.1 <sup>+2</sup> | y <sub>1</sub> <sup>+2</sup>                  | 312.2 | ESI-H <sub>2</sub> O | 504.3 | TTLES-28                | 703.3               | uTTLE-H <sub>2</sub> O                          | 1008.5 | TLTuTTLE-28               |
| 84.1               | K                                             | 312.2 | LES-H <sub>2</sub> O | 514.3 | TTLES-H <sub>2</sub> O  | 721.3               | uTTLE                                           | 1016.5 | uTTLESIL-H <sub>2</sub> O |
| 86.1               | L                                             | 314.2 | SIL                  | 516.3 | TLESIL-28               | 730.4               | TTLESIL-28                                      | 1018.5 | TLTuTTLE-H <sub>2</sub> O |
| 86.1               | I                                             | 316.2 | TLT                  | 526.3 | TLESIL-H <sub>2</sub> O | 739.4 <sup>+2</sup> | y <sub>12</sub> -H <sub>2</sub> O <sup>+2</sup> | 1022.5 | LTuTTLES                  |
| 101.1              | K                                             | 316.2 | b <sub>3</sub>       | 528.3 | LESIL-28                | 740.0 <sup>+2</sup> | y <sub>12</sub> -NH <sub>3</sub> <sup>+2</sup>  | 1022.5 | TuTTLESI                  |
| 102.1              | E                                             | 316.2 | TLE-28               | 532.3 | TTLES                   | 740.4               | TTLESIL-H <sub>2</sub> O                        | 1034.5 | uTTLESIL                  |



|                     |                                                              |                     |                                                              |                     |                                                               |                        |                                       |        |                                      |
|---------------------|--------------------------------------------------------------|---------------------|--------------------------------------------------------------|---------------------|---------------------------------------------------------------|------------------------|---------------------------------------|--------|--------------------------------------|
| 122.1 <sup>+2</sup> | <b>y<sub>2</sub><sup>-</sup>-NH<sub>3</sub><sup>+2</sup></b> | 316.2               | <b>TTL</b>                                                   | 538.3               | <b>LESIL-H<sub>2</sub>O</b>                                   | 748.4087 <sup>+2</sup> | <b>y<sub>12</sub><sup>+2</sup></b>    | 1036.5 | <b>TLTuTTLE</b>                      |
| 126.1               | <b>K</b>                                                     | 326.2               | <b>TLE-H<sub>2</sub>O</b>                                    | 544.3               | <b>TLESI</b>                                                  | 758.4                  | <b>TTLESIL</b>                        | 1095.5 | <b>TLTuTTLES-28</b>                  |
| 129.1               | <b>K</b>                                                     | 330.2               | <b>ESI</b>                                                   | 552.3               | <b>TuTT-28</b>                                                | 766.4                  | <b>TLTuTT-28</b>                      | 1105.5 | <b>TLTuTTLES-H<sub>2</sub>O</b>      |
| 130.1               | <b>y<sub>1</sub><sup>-</sup>-NH<sub>3</sub></b>              | 330.2               | <b>LES</b>                                                   | 556.3               | <b>LESIL</b>                                                  | 766.4                  | <b>a<sub>6</sub></b>                  | 1107.6 | <b>TuTTLESIL-28</b>                  |
| 130.6 <sup>+2</sup> | <b>y<sub>2</sub><sup>+2</sup></b>                            | 342.7 <sup>+2</sup> | <b>y<sub>6</sub><sup>-</sup>-H<sub>2</sub>O<sup>+2</sup></b> | 562.2               | <b>TuTT-H<sub>2</sub>O</b>                                    | 776.4                  | <b>b<sub>6</sub>-H<sub>2</sub>O</b>   | 1107.6 | <b>LTuTTLESI-28</b>                  |
| 147.1               | <b>y<sub>1</sub></b>                                         | 343.2 <sup>+2</sup> | <b>y<sub>6</sub><sup>-</sup>-NH<sub>3</sub><sup>+2</sup></b> | 564.3               | <b>TLTu-28</b>                                                | 776.4                  | <b>TLTuTT-H<sub>2</sub>O</b>          | 1109.6 | <b>a<sub>9</sub></b>                 |
| 173.1               | <b>SI-28</b>                                                 | 344.2               | <b>TLE</b>                                                   | 564.3               | <b>LTuT-28</b>                                                | 778.4                  | <b>LTuTTL-28</b>                      | 1117.6 | <b>LTuTTLESI-H<sub>2</sub>O</b>      |
| 175.1               | <b>a<sub>2</sub></b>                                         | 350.2               | <b>uT-28</b>                                                 | 564.3               | <b>uTTL-28</b>                                                | 780.4                  | <b>uTTLES-28</b>                      | 1117.6 | <b>TuTTLESIL-H<sub>2</sub>O</b>      |
| 175.1               | <b>TT-28</b>                                                 | 350.2               | <b>Tu-28</b>                                                 | 571.3               | <b>y<sub>5</sub>-H<sub>2</sub>O</b>                           | 785.5                  | <b>y<sub>7</sub>-H<sub>2</sub>O</b>   | 1119.5 | <b>b<sub>9</sub>-H<sub>2</sub>O</b>  |
| 178.6 <sup>+2</sup> | <b>y<sub>3</sub><sup>-</sup>-NH<sub>3</sub><sup>+2</sup></b> | 351.7 <sup>+2</sup> | <b>y<sub>6</sub><sup>+2</sup></b>                            | 572.3               | <b>y<sub>5</sub>-NH<sub>3</sub></b>                           | 786.5                  | <b>y<sub>7</sub>-NH<sub>3</sub></b>   | 1123.5 | <b>TLTuTTLES</b>                     |
| 183.1               | <b>SI-H<sub>2</sub>O</b>                                     | 356.3               | <b>y<sub>3</sub>-NH<sub>3</sub></b>                          | 574.3               | <b>TLTu-H<sub>2</sub>O</b>                                    | 788.4                  | <b>LTuTTL-H<sub>2</sub>O</b>          | 1135.6 | <b>TuTTLESIL</b>                     |
| 185.1               | <b>b<sub>2</sub>-H<sub>2</sub>O</b>                          | 360.1               | <b>Tu-H<sub>2</sub>O</b>                                     | 574.3               | <b>LTuT-H<sub>2</sub>O</b>                                    | 789.9 <sup>+2</sup>    | <b>MH-H<sub>2</sub>O<sup>+2</sup></b> | 1135.6 | <b>LTuTTLESI</b>                     |
| 185.1               | <b>TT-H<sub>2</sub>O</b>                                     | 360.1               | <b>uT-H<sub>2</sub>O</b>                                     | 574.3               | <b>uTTL-H<sub>2</sub>O</b>                                    | 790.3                  | <b>uTTLES-H<sub>2</sub>O</b>          | 1137.6 | <b>b<sub>9</sub></b>                 |
| 187.1               | <b>TL-28</b>                                                 | 373.3               | <b>y<sub>3</sub></b>                                         | 580.2               | <b>TuTT</b>                                                   | 790.4 <sup>+2</sup>    | <b>MH-NH<sub>3</sub><sup>+2</sup></b> | 1162.6 | <b>y<sub>9</sub>-H<sub>2</sub>O</b>  |
| 187.1               | <b>LT-28</b>                                                 | 378.2               | <b>uT</b>                                                    | 581.8 <sup>+2</sup> | <b>y<sub>9</sub><sup>-</sup>-H<sub>2</sub>O<sup>+2</sup></b>  | 794.4                  | <b>b<sub>6</sub></b>                  | 1163.6 | <b>y<sub>9</sub>-NH<sub>3</sub></b>  |
| 187.1 <sup>+2</sup> | <b>y<sub>3</sub><sup>+2</sup></b>                            | 378.2               | <b>Tu</b>                                                    | 582.3 <sup>+2</sup> | <b>y<sub>9</sub><sup>-</sup>-NH<sub>3</sub><sup>+2</sup></b>  | 794.4                  | <b>TLTuTT</b>                         | 1180.6 | <b>y<sub>9</sub></b>                 |
| 189.1               | <b>ES-28</b>                                                 | 389.2               | <b>a<sub>4</sub></b>                                         | 589.4               | <b>y<sub>5</sub></b>                                          | 794.4                  | <b>TuTTLE-28</b>                      | 1196.6 | <b>a<sub>10</sub></b>                |
| 197.1               | <b>TL-H<sub>2</sub>O</b>                                     | 393.2 <sup>+2</sup> | <b>y<sub>7</sub>-H<sub>2</sub>O<sup>+2</sup></b>             | 590.8 <sup>+2</sup> | <b>y<sub>9</sub><sup>+2</sup></b>                             | 798.9 <sup>+2</sup>    | <b>MH<sup>+2</sup></b>                | 1206.6 | <b>b<sub>10</sub>-H<sub>2</sub>O</b> |
| 197.1               | <b>LT-H<sub>2</sub>O</b>                                     | 393.7 <sup>+2</sup> | <b>y<sub>7</sub>-NH<sub>3</sub><sup>+2</sup></b>             | 592.3               | <b>TLTu</b>                                                   | 803.5                  | <b>y<sub>7</sub></b>                  | 1208.6 | <b>TLTuTTLESI-28</b>                 |
| 199.1               | <b>ES-H<sub>2</sub>O</b>                                     | 399.2               | <b>b<sub>4</sub>-H<sub>2</sub>O</b>                          | 592.3               | <b>LTuT</b>                                                   | 804.4                  | <b>TuTTLE-H<sub>2</sub>O</b>          | 1218.6 | <b>TLTuTTLESI-H<sub>2</sub>O</b>     |
| 199.2               | <b>IL-28</b>                                                 | 402.3 <sup>+2</sup> | <b>y<sub>7</sub><sup>+2</sup></b>                            | 592.3               | <b>uTTL</b>                                                   | 806.4                  | <b>LTuTTL</b>                         | 1220.7 | <b>LTuTTLESIL-28</b>                 |
| 201.1               | <b>SI</b>                                                    | 403.2               | <b>TLES-28</b>                                               | 617.4               | <b>TTLESIL-28</b>                                             | 808.4                  | <b>uTTLES</b>                         | 1224.6 | <b>b<sub>10</sub></b>                |
| 203.1               | <b>b<sub>2</sub></b>                                         | 413.2               | <b>TLES-H<sub>2</sub>O</b>                                   | 627.3               | <b>TTLESIL-H<sub>2</sub>O</b>                                 | 822.4                  | <b>TuTTLE</b>                         | 1230.6 | <b>LTuTTLESIL-H<sub>2</sub>O</b>     |
| 203.1               | <b>TT</b>                                                    | 415.3               | <b>ESIL-28</b>                                               | 629.4               | <b>TLESIL-28</b>                                              | 867.4                  | <b>a<sub>7</sub></b>                  | 1236.6 | <b>TLTuTTLESI</b>                    |
| 215.1               | <b>TL</b>                                                    | 415.3               | <b>LESI-28</b>                                               | 632.3 <sup>+2</sup> | <b>y<sub>10</sub><sup>-</sup>-H<sub>2</sub>O<sup>+2</sup></b> | 877.4                  | <b>b<sub>7</sub>-H<sub>2</sub>O</b>   | 1248.7 | <b>LTuTTLESIL</b>                    |
| 215.1               | <b>LT</b>                                                    | 417.2               | <b>b<sub>4</sub></b>                                         | 632.8 <sup>+2</sup> | <b>y<sub>10</sub><sup>-</sup>-NH<sub>3</sub><sup>+2</sup></b> | 879.5                  | <b>TLTuTTL-28</b>                     | 1263.7 | <b>y<sub>10</sub>-H<sub>2</sub>O</b> |

|                     |                                                            |                     |                                                |                     |                                                             |        |                                  |        |                                   |
|---------------------|------------------------------------------------------------|---------------------|------------------------------------------------|---------------------|-------------------------------------------------------------|--------|----------------------------------|--------|-----------------------------------|
| 215.1               | LE-28                                                      | 417.2               | TTLE-28                                        | 639.4               | TLESIL-H <sub>2</sub> O                                     | 881.4  | TuTTLES-28                       | 1264.7 | y <sub>10</sub> -NH <sub>3</sub>  |
| 217.1               | ES                                                         | 425.2               | ESIL-H <sub>2</sub> O                          | 641.3 <sup>+2</sup> | y <sub>10</sub> <sup>+2</sup>                               | 886.5  | y <sub>8</sub> -H <sub>2</sub> O | 1281.7 | y <sub>10</sub>                   |
| 221.7 <sup>+2</sup> | y <sub>4</sub> <sup>-</sup> H <sub>2</sub> O <sup>+2</sup> | 425.2               | LESI-H <sub>2</sub> O                          | 645.3               | TTLESI                                                      | 887.5  | y <sub>8</sub> -NH <sub>3</sub>  | 1309.7 | a <sub>11</sub>                   |
| 222.2 <sup>+2</sup> | y <sub>4</sub> <sup>-</sup> NH <sub>3</sub> <sup>+2</sup>  | 427.2               | TTLE-H <sub>2</sub> O                          | 657.4               | TLESIL                                                      | 889.5  | TLTuTTL-H <sub>2</sub> O         | 1319.7 | b <sub>11</sub> -H <sub>2</sub> O |
| 225.1               | LE-H <sub>2</sub> O                                        | 431.2               | TLES                                           | 665.3               | TLTuT-28                                                    | 891.4  | TuTTLES-H <sub>2</sub> O         | 1321.7 | TLTuTTLESIL-28                    |
| 227.2               | IL                                                         | 442.3               | y <sub>4</sub> -H <sub>2</sub> O               | 665.3               | a <sub>5</sub>                                              | 893.4  | uTTLESI-28                       | 1331.7 | TLTuTTLESIL-H <sub>2</sub> O      |
| 230.7 <sup>+2</sup> | y <sub>4</sub> <sup>+2</sup>                               | 443.3               | ESIL                                           | 665.3               | LTuTT-28                                                    | 895.4  | b <sub>7</sub>                   | 1337.7 | b <sub>11</sub>                   |
| 243.1               | LE                                                         | 443.3               | LESI                                           | 665.3               | TuTTL-28                                                    | 903.4  | uTTLESI-H <sub>2</sub> O         | 1349.7 | TLTuTTLESIL                       |
| 243.2               | y <sub>2</sub> <sup>-</sup> NH <sub>3</sub>                | 443.3               | y <sub>4</sub> -NH <sub>3</sub>                | 675.3               | TLTuT-H <sub>2</sub> O                                      | 904.5  | y <sub>8</sub>                   | 1376.8 | y <sub>11</sub> -H <sub>2</sub> O |
| 260.2               | y <sub>2</sub>                                             | 443.8 <sup>+2</sup> | y <sub>8</sub> -H <sub>2</sub> O <sup>+2</sup> | 675.3               | b <sub>5</sub> -H <sub>2</sub> O                            | 907.5  | TLTuTTL                          | 1377.7 | y <sub>11</sub> -NH <sub>3</sub>  |
| 286.2 <sup>+2</sup> | y <sub>5</sub> <sup>-</sup> H <sub>2</sub> O <sup>+2</sup> | 444.3 <sup>+2</sup> | y <sub>8</sub> -NH <sub>3</sub> <sup>+2</sup>  | 675.3               | LTuTT-H <sub>2</sub> O                                      | 907.5  | LTuTTLE-28                       | 1394.8 | y <sub>11</sub>                   |
| 286.2               | SIL-28                                                     | 445.2               | TTLE                                           | 675.3               | TuTTL-H <sub>2</sub> O                                      | 909.4  | TuTTLES                          | 1422.8 | a <sub>12</sub>                   |
| 286.7 <sup>+2</sup> | y <sub>5</sub> <sup>-</sup> NH <sub>3</sub> <sup>+2</sup>  | 451.2               | uTT-28                                         | 684.4               | y <sub>6</sub> -H <sub>2</sub> O                            | 917.4  | LTuTTLE-H <sub>2</sub> O         | 1432.7 | b <sub>12</sub> -H <sub>2</sub> O |
| 288.2               | TLT-28                                                     | 451.2               | TuT-28                                         | 685.4               | y <sub>6</sub> -NH <sub>3</sub>                             | 921.4  | uTTLESI                          | 1450.8 | b <sub>12</sub>                   |
| 288.2               | a <sub>3</sub>                                             | 452.8 <sup>+2</sup> | y <sub>8</sub> <sup>+2</sup>                   | 688.9 <sup>+2</sup> | y <sub>11</sub> <sup>-</sup> H <sub>2</sub> O <sup>+2</sup> | 935.5  | LTuTTLE                          | 1477.8 | y <sub>12</sub> -H <sub>2</sub> O |
| 288.2               | TTL-28                                                     | 460.3               | y <sub>4</sub>                                 | 689.4 <sup>+2</sup> | y <sub>11</sub> <sup>-</sup> NH <sub>3</sub> <sup>+2</sup>  | 980.5  | a <sub>8</sub>                   | 1478.8 | y <sub>12</sub> -NH <sub>3</sub>  |
| 295.2 <sup>+2</sup> | y <sub>5</sub> <sup>+2</sup>                               | 461.2               | uTT-H <sub>2</sub> O                           | 693.3               | b <sub>5</sub>                                              | 990.5  | b <sub>8</sub> -H <sub>2</sub> O | 1495.8 | y <sub>12</sub>                   |
| 296.2               | SIL-H <sub>2</sub> O                                       | 461.2               | TuT-H <sub>2</sub> O                           | 693.3               | TLTuT                                                       | 994.5  | LTuTTLES-28                      | 1578.8 | MH-H <sub>2</sub> O               |
| 298.2               | b <sub>3</sub> <sup>-</sup> H <sub>2</sub> O               | 463.2               | LTu-28                                         | 693.3               | uTTLE-28                                                    | 994.5  | TuTTLESI-28                      | 1579.8 | MH-NH <sub>3</sub>                |
| 298.2               | TLT-H <sub>2</sub> O                                       | 473.2               | LTu-H <sub>2</sub> O                           | 693.3               | TuTTL                                                       | 1004.5 | TuTTLESI-H <sub>2</sub> O        | 1596.9 | MH                                |

# MS2: TTLTNTTLESILK

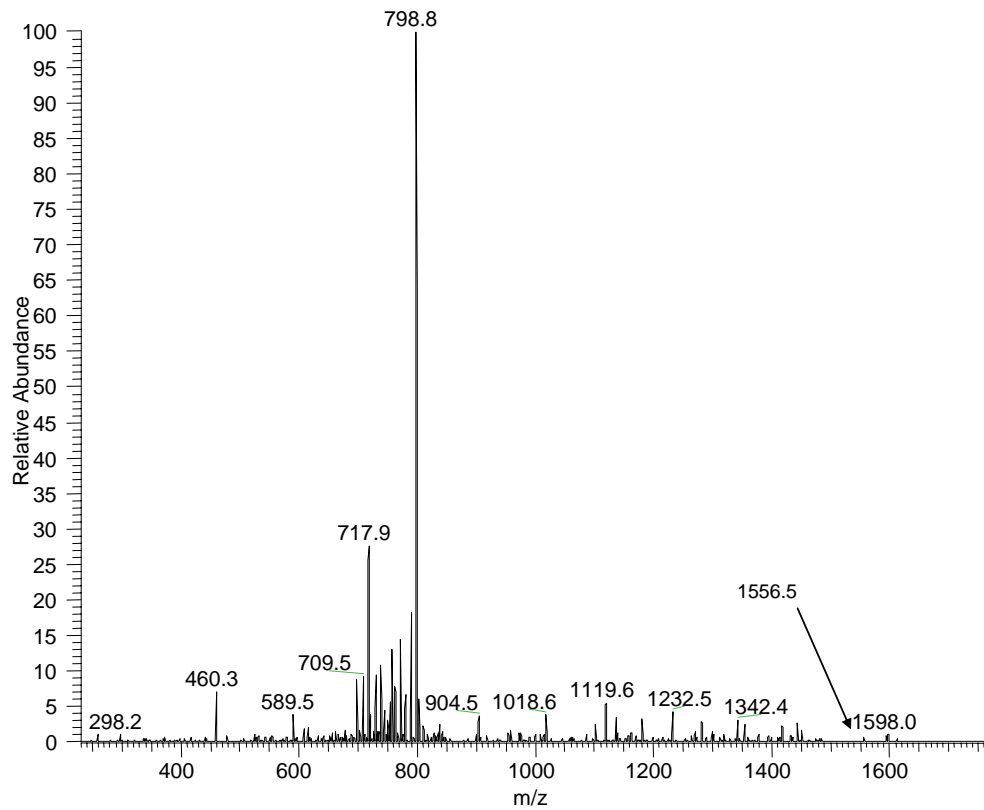

|                     |                                                              |       |                                     |       |                                     |                     |                                     |        |                                 |
|---------------------|--------------------------------------------------------------|-------|-------------------------------------|-------|-------------------------------------|---------------------|-------------------------------------|--------|---------------------------------|
| 60.0                | <b>S</b>                                                     | 298.2 | <b>b<sub>3</sub>-H<sub>2</sub>O</b> | 540.2 | <b>Tv</b>                           | 827.4               | <b>a<sub>5</sub></b>                | 1166.5 | <b>TvTTLESIL-H<sub>2</sub>O</b> |
| 65.6 <sup>+2</sup>  | <b>y<sub>1</sub><sup>-</sup>-NH<sub>3</sub><sup>+2</sup></b> | 302.2 | <b>ESI-28</b>                       | 544.3 | <b>TLESIL</b>                       | 827.4               | <b>TLTvT-28</b>                     | 1168.6 | <b>vTTLESIL-28</b>              |
| 74.1                | <b>T</b>                                                     | 302.2 | <b>LES-28</b>                       | 556.3 | <b>LESIL</b>                        | 829.4 <sup>+2</sup> | <b>y<sub>12</sub><sup>+2</sup></b>  | 1170.6 | <b>TLTvTTLE-28</b>              |
| 74.1 <sup>+2</sup>  | <b>y<sub>1</sub><sup>+2</sup></b>                            | 312.2 | <b>ESI-H<sub>2</sub>O</b>           | 571.3 | <b>y<sub>5</sub>-H<sub>2</sub>O</b> | 837.4               | <b>TvTTL-H<sub>2</sub>O</b>         | 1170.6 | <b>b<sub>8</sub></b>            |
| 84.1                | <b>K</b>                                                     | 312.2 | <b>LES-H<sub>2</sub>O</b>           | 572.3 | <b>y<sub>5</sub>-NH<sub>3</sub></b> | 837.4               | <b>LTvTT-H<sub>2</sub>O</b>         | 1178.6 | <b>vTTLESIL-H<sub>2</sub>O</b>  |
| 86.1                | <b>L</b>                                                     | 314.2 | <b>SIL</b>                          | 589.4 | <b>y<sub>5</sub></b>                | 837.4               | <b>TLTvT-H<sub>2</sub>O</b>         | 1180.5 | <b>TLTvTTLE-H<sub>2</sub>O</b>  |
| 86.1                | <b>I</b>                                                     | 316.2 | <b>TLE-28</b>                       | 613.3 | <b>vTT-28</b>                       | 837.4               | <b>b<sub>5</sub>-H<sub>2</sub>O</b> | 1184.5 | <b>TvTTLESIL</b>                |
| 101.1               | <b>K</b>                                                     | 316.2 | <b>TTL</b>                          | 613.3 | <b>TvT-28</b>                       | 855.4               | <b>vTTLE-28</b>                     | 1184.5 | <b>LTvTTLES</b>                 |
| 102.1               | <b>E</b>                                                     | 316.2 | <b>b<sub>3</sub></b>                | 617.4 | <b>TTLESIL-28</b>                   | 855.4               | <b>TvTTL</b>                        | 1196.6 | <b>vTTLESIL</b>                 |
| 122.1 <sup>+2</sup> | <b>y<sub>2</sub><sup>-</sup>-NH<sub>3</sub><sup>+2</sup></b> | 316.2 | <b>TLT</b>                          | 623.2 | <b>vTT-H<sub>2</sub>O</b>           | 855.4               | <b>LTvTT</b>                        | 1198.6 | <b>TLTvTTLE</b>                 |
| 126.1               | <b>K</b>                                                     | 326.2 | <b>TLE-H<sub>2</sub>O</b>           | 623.2 | <b>TvT-H<sub>2</sub>O</b>           | 855.4               | <b>b<sub>5</sub></b>                | 1257.6 | <b>TLTvTTLES-28</b>             |
| 129.1               | <b>K</b>                                                     | 330.2 | <b>LES</b>                          | 625.3 | <b>LTv-28</b>                       | 855.4               | <b>TLTvT</b>                        | 1267.6 | <b>TLTvTTLES-H<sub>2</sub>O</b> |
| 130.1               | <b>y<sub>1</sub><sup>-</sup>-NH<sub>3</sub></b>              | 330.2 | <b>ESI</b>                          | 627.3 | <b>TTLESIL-H<sub>2</sub>O</b>       | 865.4               | <b>vTTLE-H<sub>2</sub>O</b>         | 1269.6 | <b>LTvTTLESIL-28</b>            |

|                     |                               |                     |                               |                     |                                  |                     |                              |        |                              |
|---------------------|-------------------------------|---------------------|-------------------------------|---------------------|----------------------------------|---------------------|------------------------------|--------|------------------------------|
| 130.6 <sup>+2</sup> | $y_2^{+2}$                    | 342.7 <sup>+2</sup> | $y_6\text{-H}_2\text{O}^{+2}$ | 629.4               | TLESIL-28                        | 871.0 <sup>+2</sup> | $\text{MH-H}_2\text{O}^{+2}$ | 1269.6 | TvTTLESIL-28                 |
| 147.1               | $y_1$                         | 343.2 <sup>+2</sup> | $y_6\text{-NH}_3^{+2}$        | 635.3               | LTV-H <sub>2</sub> O             | 871.5 <sup>+2</sup> | $\text{MH-NH}_3^{+2}$        | 1271.6 | $a_9$                        |
| 173.1               | SI-28                         | 344.2               | TLE                           | 639.4               | TLESIL-H <sub>2</sub> O          | 880.0 <sup>+2</sup> | $\text{MH}^{+2}$             | 1279.6 | TvTTLESIL-H <sub>2</sub> O   |
| 175.1               | TT-28                         | 351.7 <sup>+2</sup> | $y_6^{+2}$                    | 641.3               | vTT                              | 883.4               | vTTLE                        | 1279.6 | LTVTTLESIL-H <sub>2</sub> O  |
| 175.1               | $a_2$                         | 356.3               | $y_3\text{-NH}_3$             | 641.3               | TvT                              | 886.5               | $y_8\text{-H}_2\text{O}$     | 1281.6 | $b_9\text{-H}_2\text{O}$     |
| 178.6 <sup>+2</sup> | $y_3\text{-NH}_3^{+2}$        | 373.3               | $y_3$                         | 645.3               | TTLESI                           | 887.5               | $y_8\text{-NH}_3$            | 1285.6 | TLTVTTLES                    |
| 183.1               | SI-H <sub>2</sub> O           | 389.2               | $a_4$                         | 653.3               | LTV                              | 904.5               | $y_8$                        | 1297.6 | LTVTTLESI                    |
| 185.1               | TT-H <sub>2</sub> O           | 393.2 <sup>+2</sup> | $y_7\text{-H}_2\text{O}^{+2}$ | 657.4               | TLESIL                           | 928.4               | TLTVTT-28                    | 1297.6 | TvTTLESIL                    |
| 185.1               | $b_2\text{-H}_2\text{O}$      | 393.7 <sup>+2</sup> | $y_7\text{-NH}_3^{+2}$        | 662.8 <sup>+2</sup> | $y_9\text{-H}_2\text{O}^{+2}$    | 928.4               | $a_6$                        | 1299.6 | $b_9$                        |
| 187.1               | TL-28                         | 399.2               | $b_4\text{-H}_2\text{O}$      | 663.3 <sup>+2</sup> | $y_9\text{-NH}_3^{+2}$           | 938.4               | TLTVTT-H <sub>2</sub> O      | 1324.7 | $y_9\text{-H}_2\text{O}$     |
| 187.1               | LT-28                         | 402.3 <sup>+2</sup> | $y_7^{+2}$                    | 671.8 <sup>+2</sup> | $y_9^{+2}$                       | 938.4               | $b_6\text{-H}_2\text{O}$     | 1325.7 | $y_9\text{-NH}_3$            |
| 187.1 <sup>+2</sup> | $y_3^{+2}$                    | 403.2               | TLES-28                       | 684.4               | $y_6\text{-H}_2\text{O}$         | 940.5               | LTVTTL-28                    | 1342.7 | $y_9$                        |
| 189.1               | ES-28                         | 413.2               | TLES-H <sub>2</sub> O         | 685.4               | $y_6\text{-NH}_3$                | 942.4               | vTTLES-28                    | 1358.6 | $a_{10}$                     |
| 197.1               | TL-H <sub>2</sub> O           | 415.3               | ESIL-28                       | 702.4               | $y_6$                            | 950.5               | LTVTTL-H <sub>2</sub> O      | 1368.6 | $b_{10}\text{-H}_2\text{O}$  |
| 197.1               | LT-H <sub>2</sub> O           | 415.3               | LESI-28                       | 713.4 <sup>+2</sup> | $y_{10}\text{-H}_2\text{O}^{+2}$ | 952.4               | vTTLES-H <sub>2</sub> O      | 1370.7 | TLTVTTLESIL-28               |
| 199.1               | ES-H <sub>2</sub> O           | 417.2               | TTLE-28                       | 713.9 <sup>+2</sup> | $y_{10}\text{-NH}_3^{+2}$        | 956.4               | TvTTLE-28                    | 1380.7 | TLTVTTLESIL-H <sub>2</sub> O |
| 199.2               | IL-28                         | 417.2               | $b_4$                         | 714.3               | TvTT-28                          | 956.4               | TLTVTT                       | 1382.7 | LTVTTLESIL-28                |
| 201.1               | SI                            | 425.2               | ESIL-H <sub>2</sub> O         | 722.4 <sup>+2</sup> | $y_{10}^{+2}$                    | 956.4               | $b_6$                        | 1386.6 | $b_{10}$                     |
| 203.1               | TT                            | 425.2               | LESI-H <sub>2</sub> O         | 724.3               | TvTT-H <sub>2</sub> O            | 966.4               | TvTTLE-H <sub>2</sub> O      | 1392.7 | LTVTTLESIL-H <sub>2</sub> O  |
| 203.1               | $b_2$                         | 427.2               | TTLE-H <sub>2</sub> O         | 726.3               | vTTL-28                          | 968.5               | LTVTTL                       | 1398.7 | TLTVTTLESI                   |
| 215.1               | LE-28                         | 431.2               | TLES                          | 726.3               | TLTV-28                          | 970.4               | vTTLES                       | 1410.7 | LTVTTLESIL                   |
| 215.1               | TL                            | 442.3               | $y_4\text{-H}_2\text{O}$      | 726.3               | LTVT-28                          | 984.4               | TvTTLE                       | 1425.7 | $y_{10}\text{-H}_2\text{O}$  |
| 215.1               | LT                            | 443.3               | LESI                          | 730.4               | TTLESIL-28                       | 1029.5              | $a_7$                        | 1426.7 | $y_{10}\text{-NH}_3$         |
| 217.1               | ES                            | 443.3               | ESIL                          | 736.3               | vTTL-H <sub>2</sub> O            | 1039.5              | $b_7\text{-H}_2\text{O}$     | 1443.7 | $y_{10}$                     |
| 221.7 <sup>+2</sup> | $y_4\text{-H}_2\text{O}^{+2}$ | 443.3               | $y_4\text{-NH}_3$             | 736.3               | TLTV-H <sub>2</sub> O            | 1041.5              | TLTVTTL-28                   | 1471.7 | $a_{11}$                     |
| 222.2 <sup>+2</sup> | $y_4\text{-NH}_3^{+2}$        | 443.8 <sup>+2</sup> | $y_8\text{-H}_2\text{O}^{+2}$ | 736.3               | LTVT-H <sub>2</sub> O            | 1043.5              | TvTTLES-28                   | 1481.7 | $b_{11}\text{-H}_2\text{O}$  |
| 225.1               | LE-H <sub>2</sub> O           | 444.3 <sup>+2</sup> | $y_8\text{-NH}_3^{+2}$        | 740.4               | TTLESIL-H <sub>2</sub> O         | 1051.5              | TLTVTTL-H <sub>2</sub> O     | 1483.8 | TLTVTTLESIL-28               |
| 227.2               | IL                            | 445.2               | TTLE                          | 742.3               | TvTT                             | 1053.4              | TvTTLES-H <sub>2</sub> O     | 1493.7 | TLTVTTLESIL-H <sub>2</sub> O |

|                     |                                                             |                     |                                   |                     |                                                   |        |                                     |        |                                      |
|---------------------|-------------------------------------------------------------|---------------------|-----------------------------------|---------------------|---------------------------------------------------|--------|-------------------------------------|--------|--------------------------------------|
| 230.7 <sup>+2</sup> | <b>y<sub>4</sub><sup>+2</sup></b>                           | 452.8 <sup>+2</sup> | <b>y<sub>8</sub><sup>+2</sup></b> | 754.3               | <b>vTTL</b>                                       | 1055.5 | <b>vTTLESI-28</b>                   | 1499.7 | <b>b<sub>11</sub></b>                |
| 243.1               | <b>LE</b>                                                   | 460.3               | <b>y<sub>4</sub></b>              | 754.3               | <b>LTvT</b>                                       | 1057.5 | <b>b<sub>7</sub></b>                | 1511.8 | <b>TLTvTTLESIL</b>                   |
| 243.2               | <b>y<sub>2</sub><sup>-</sup>NH<sub>3</sub></b>              | 504.3               | <b>TTLES-28</b>                   | 754.3               | <b>TLTv</b>                                       | 1065.5 | <b>vTTLESI-H<sub>2</sub>O</b>       | 1538.8 | <b>y<sub>11</sub>-H<sub>2</sub>O</b> |
| 260.2               | <b>y<sub>2</sub></b>                                        | 512.2               | <b>Tv-28</b>                      | 758.4               | <b>TTLESIL</b>                                    | 1069.5 | <b>LTvTTLE-28</b>                   | 1539.8 | <b>y<sub>11</sub>-NH<sub>3</sub></b> |
| 286.2 <sup>+2</sup> | <b>y<sub>5</sub><sup>-</sup>H<sub>2</sub>O<sup>+2</sup></b> | 512.2               | <b>vT-28</b>                      | 769.9 <sup>+2</sup> | <b>y<sub>11</sub>-H<sub>2</sub>O<sup>+2</sup></b> | 1069.5 | <b>TLTvTTL</b>                      | 1556.8 | <b>y<sub>11</sub></b>                |
| 286.2               | <b>SIL-28</b>                                               | 514.3               | <b>TTLES-H<sub>2</sub>O</b>       | 770.4 <sup>+2</sup> | <b>y<sub>11</sub>-NH<sub>3</sub><sup>+2</sup></b> | 1071.5 | <b>TvTTLES</b>                      | 1584.8 | <b>a<sub>12</sub></b>                |
| 286.7 <sup>+2</sup> | <b>y<sub>5</sub><sup>-</sup>NH<sub>3</sub><sup>+2</sup></b> | 516.3               | <b>TLESI-28</b>                   | 778.9 <sup>+2</sup> | <b>y<sub>11</sub><sup>+2</sup></b>                | 1079.5 | <b>LTvTTLE-H<sub>2</sub>O</b>       | 1594.8 | <b>b<sub>12</sub>-H<sub>2</sub>O</b> |
| 288.2               | <b>TTL-28</b>                                               | 522.2               | <b>vT-H<sub>2</sub>O</b>          | 785.5               | <b>y<sub>7</sub>-H<sub>2</sub>O</b>               | 1083.5 | <b>vTTLESI</b>                      | 1612.8 | <b>b<sub>12</sub></b>                |
| 288.2               | <b>a<sub>3</sub></b>                                        | 522.2               | <b>Tv-H<sub>2</sub>O</b>          | 786.5               | <b>y<sub>7</sub>-NH<sub>3</sub></b>               | 1097.5 | <b>LTvTTLE</b>                      | 1639.9 | <b>y<sub>12</sub>-H<sub>2</sub>O</b> |
| 288.2               | <b>TLT-28</b>                                               | 526.3               | <b>TLESI-H<sub>2</sub>O</b>       | 803.5               | <b>y<sub>7</sub></b>                              | 1142.6 | <b>a<sub>8</sub></b>                | 1640.8 | <b>y<sub>12</sub>-NH<sub>3</sub></b> |
| 295.2 <sup>+2</sup> | <b>y<sub>5</sub><sup>+2</sup></b>                           | 528.3               | <b>LESIL-28</b>                   | 820.4 <sup>+2</sup> | <b>y<sub>12</sub>-H<sub>2</sub>O<sup>+2</sup></b> | 1152.6 | <b>b<sub>8</sub>-H<sub>2</sub>O</b> | 1657.9 | <b>y<sub>12</sub></b>                |
| 296.2               | <b>SIL-H<sub>2</sub>O</b>                                   | 532.3               | <b>TTLES</b>                      | 820.9 <sup>+2</sup> | <b>y<sub>12</sub>-NH<sub>3</sub><sup>+2</sup></b> | 1156.5 | <b>LTvTTLES-28</b>                  | 1740.9 | <b>MH-H<sub>2</sub>O</b>             |
| 298.2               | <b>TTL-H<sub>2</sub>O</b>                                   | 538.3               | <b>LESIL-H<sub>2</sub>O</b>       | 827.4               | <b>TvTTL-28</b>                                   | 1156.5 | <b>TvTTLESI-28</b>                  | 1741.9 | <b>MH-NH<sub>3</sub></b>             |
| 298.2               | <b>TLT-H<sub>2</sub>O</b>                                   | 540.2               | <b>vT</b>                         | 827.4               | <b>LTvTT-28</b>                                   | 1166.5 | <b>LTvTTLES-H<sub>2</sub>O</b>      | 1758.9 | <b>MH</b>                            |

## GTFVNITANQR

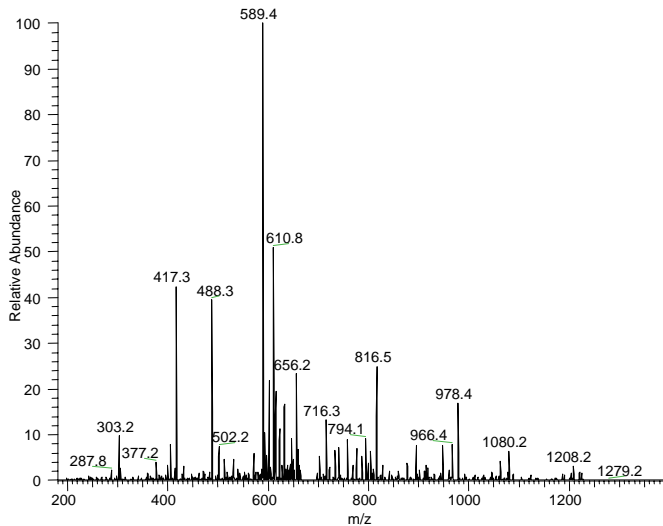

|      |          |       |                           |                     |                                                             |                     |                                    |       |                               |
|------|----------|-------|---------------------------|---------------------|-------------------------------------------------------------|---------------------|------------------------------------|-------|-------------------------------|
| 70.1 | <b>R</b> | 259.1 | <b>TAN-28</b>             | 473.2               | <b>uIT-H<sub>2</sub>O</b>                                   | 663.3 <sup>+2</sup> | <b>y<sub>10</sub><sup>+2</sup></b> | 905.4 | <b>FVuITAN-NH<sub>3</sub></b> |
| 72.1 | <b>V</b> | 268.2 | <b>ITA-H<sub>2</sub>O</b> | 480.7 <sup>+2</sup> | <b>y<sub>7</sub><sup>-</sup>H<sub>2</sub>O<sup>+2</sup></b> | 676.3               | <b>uITAN</b>                       | 909.5 | <b>TFVuITA</b>                |
| 74.1 | <b>T</b> | 269.1 | <b>TAN-H<sub>2</sub>O</b> | 481.2 <sup>+2</sup> | <b>y<sub>7</sub><sup>-</sup>NH<sub>3</sub><sup>+2</sup></b> | 681.3               | <b>b<sub>5</sub></b>               | 922.5 | <b>FVuITAN</b>                |

|                     |                                                  |                     |                                                  |                     |                                                  |                     |                                       |        |                                      |
|---------------------|--------------------------------------------------|---------------------|--------------------------------------------------|---------------------|--------------------------------------------------|---------------------|---------------------------------------|--------|--------------------------------------|
| 79.6 <sup>+2</sup>  | <b>y<sub>1</sub>-NH<sub>3</sub><sup>+2</sup></b> | 270.1               | <b>TAN-NH<sub>3</sub></b>                        | 488.3               | <b>y<sub>4</sub></b>                             | 682.8 <sup>+2</sup> | <b>MH-H<sub>2</sub>O<sup>+2</sup></b> | 938.5  | <b>a<sub>8</sub></b>                 |
| 84.1                | <b>Q</b>                                         | 278.1               | <b>a<sub>3</sub></b>                             | 489.3               | <b>VuI</b>                                       | 683.3 <sup>+2</sup> | <b>MH-NH<sub>3</sub><sup>+2</sup></b> | 948.5  | <b>b<sub>8</sub>-H<sub>2</sub>O</b>  |
| 86.1                | <b>I</b>                                         | 286.1 <sup>+2</sup> | <b>y<sub>5</sub>-H<sub>2</sub>O<sup>+2</sup></b> | 489.8 <sup>+2</sup> | <b>y<sub>7</sub><sup>+2</sup></b>                | 684.4               | <b>y<sub>6</sub>-H<sub>2</sub>O</b>   | 960.5  | <b>y<sub>7</sub>-H<sub>2</sub>O</b>  |
| 87.1                | <b>N</b>                                         | 286.2               | <b>y<sub>2</sub>-NH<sub>3</sub></b>              | 491.2               | <b>uIT</b>                                       | 685.4               | <b>y<sub>6</sub>-NH<sub>3</sub></b>   | 961.5  | <b>y<sub>7</sub>-NH<sub>3</sub></b>  |
| 87.1                | <b>R</b>                                         | 286.2               | <b>ANQ-28</b>                                    | 495.2               | <b>FVu-28</b>                                    | 691.9 <sup>+2</sup> | <b>MH<sup>+2</sup></b>                | 966.5  | <b>b<sub>8</sub></b>                 |
| 88.1 <sup>+2</sup>  | <b>y<sub>1</sub><sup>+2</sup></b>                | 286.2               | <b>ITA</b>                                       | 500.3               | <b>ITANQ-28</b>                                  | 702.4               | <b>y<sub>6</sub></b>                  | 978.5  | <b>y<sub>7</sub></b>                 |
| 100.1               | <b>R</b>                                         | 286.6 <sup>+2</sup> | <b>y<sub>5</sub>-NH<sub>3</sub><sup>+2</sup></b> | 510.3               | <b>ITANQ-H<sub>2</sub>O</b>                      | 709.4               | <b>FVuIT-28</b>                       | 995.5  | <b>TFVuITAN-28</b>                   |
| 101.1               | <b>Q</b>                                         | 287.1               | <b>TAN</b>                                       | 511.3               | <b>ITANQ-NH<sub>3</sub></b>                      | 709.4               | <b>TFVuI-28</b>                       | 1005.5 | <b>TFVuITAN-H<sub>2</sub>O</b>       |
| 112.1               | <b>R</b>                                         | 288.1               | <b>b<sub>3</sub>-H<sub>2</sub>O</b>              | 523.2               | <b>FVu</b>                                       | 719.4               | <b>FVuIT-H<sub>2</sub>O</b>           | 1006.5 | <b>TFVuITAN-NH<sub>3</sub></b>       |
| 120.1               | <b>F</b>                                         | 295.2 <sup>+2</sup> | <b>y<sub>5</sub><sup>+2</sup></b>                | 528.3               | <b>ITANQ</b>                                     | 719.4               | <b>TFVuI-H<sub>2</sub>O</b>           | 1022.5 | <b>FVuITANQ-28</b>                   |
| 129.1               | <b>Q</b>                                         | 297.1               | <b>ANQ-NH<sub>3</sub></b>                        | 530.3 <sup>+2</sup> | <b>y<sub>8</sub>-H<sub>2</sub>O<sup>+2</sup></b> | 737.4               | <b>FVuIT</b>                          | 1023.5 | <b>TFVuITAN</b>                      |
| 131.1               | <b>a<sub>2</sub></b>                             | 303.2               | <b>y<sub>2</sub></b>                             | 530.8 <sup>+2</sup> | <b>y<sub>8</sub>-NH<sub>3</sub><sup>+2</sup></b> | 737.4               | <b>TFVuI</b>                          | 1032.5 | <b>FVuITANQ-H<sub>2</sub>O</b>       |
| 141.1               | <b>b<sub>2</sub>-H<sub>2</sub>O</b>              | 306.1               | <b>b<sub>3</sub></b>                             | 534.3               | <b>uITA-28</b>                                   | 747.4               | <b>VuITAN-28</b>                      | 1033.5 | <b>FVuITANQ-NH<sub>3</sub></b>       |
| 143.6 <sup>+2</sup> | <b>y<sub>2</sub>-NH<sub>3</sub><sup>+2</sup></b> | 314.1               | <b>ANQ</b>                                       | 539.3 <sup>+2</sup> | <b>y<sub>8</sub><sup>+2</sup></b>                | 757.4               | <b>VuITAN-H<sub>2</sub>O</b>          | 1035.5 | <b>a<sub>9</sub>-NH<sub>3</sub></b>  |
| 145.1               | <b>TA-28</b>                                     | 320.2               | <b>TFV-28</b>                                    | 544.3               | <b>uITA-H<sub>2</sub>O</b>                       | 758.4               | <b>VuITAN-NH<sub>3</sub></b>          | 1050.5 | <b>FVuITANQ</b>                      |
| 152.1 <sup>+2</sup> | <b>y<sub>2</sub><sup>+2</sup></b>                | 330.2               | <b>TFV-H<sub>2</sub>O</b>                        | 562.3               | <b>uITA</b>                                      | 766.4               | <b>a<sub>6</sub></b>                  | 1052.5 | <b>a<sub>9</sub></b>                 |
| 155.1               | <b>TA-H<sub>2</sub>O</b>                         | 342.7 <sup>+2</sup> | <b>y<sub>6</sub>-H<sub>2</sub>O<sup>+2</sup></b> | 562.3               | <b>VuIT-28</b>                                   | 775.4               | <b>VuITAN</b>                         | 1059.5 | <b>y<sub>8</sub>-H<sub>2</sub>O</b>  |
| 158.1               | <b>AN-28</b>                                     | 343.2 <sup>+2</sup> | <b>y<sub>6</sub>-NH<sub>3</sub><sup>+2</sup></b> | 571.3               | <b>y<sub>5</sub>-H<sub>2</sub>O</b>              | 776.4               | <b>uITANQ-28</b>                      | 1060.5 | <b>y<sub>8</sub>-NH<sub>3</sub></b>  |
| 158.1               | <b>y<sub>1</sub>-NH<sub>3</sub></b>              | 348.2               | <b>Vu-28</b>                                     | 572.3               | <b>y<sub>5</sub>-NH<sub>3</sub></b>              | 776.4               | <b>b<sub>6</sub>-H<sub>2</sub>O</b>   | 1062.5 | <b>b<sub>9</sub>-H<sub>2</sub>O</b>  |
| 159.1               | <b>b<sub>2</sub></b>                             | 348.2               | <b>TFV</b>                                       | 572.3               | <b>VuIT-H<sub>2</sub>O</b>                       | 780.4               | <b>FVuITA-28</b>                      | 1063.5 | <b>b<sub>9</sub>-NH<sub>3</sub></b>  |
| 169.1               | <b>AN-NH<sub>3</sub></b>                         | 351.7 <sup>+2</sup> | <b>y<sub>6</sub><sup>+2</sup></b>                | 589.3               | <b>y<sub>5</sub></b>                             | 786.4               | <b>uITANQ-H<sub>2</sub>O</b>          | 1077.6 | <b>y<sub>8</sub></b>                 |
| 173.1               | <b>TA</b>                                        | 362.2               | <b>uI-28</b>                                     | 590.3               | <b>VuIT</b>                                      | 787.3               | <b>uITANQ-NH<sub>3</sub></b>          | 1080.5 | <b>b<sub>9</sub></b>                 |
| 175.1               | <b>y<sub>1</sub></b>                             | 372.2               | <b>ITAN-28</b>                                   | 596.3               | <b>TFVu-28</b>                                   | 790.4               | <b>FVuITA-H<sub>2</sub>O</b>          | 1123.6 | <b>TFVuITANQ-28</b>                  |
| 186.1               | <b>AN</b>                                        | 376.2               | <b>Vu</b>                                        | 603.8 <sup>+2</sup> | <b>y<sub>9</sub>-H<sub>2</sub>O<sup>+2</sup></b> | 794.4               | <b>b<sub>6</sub></b>                  | 1133.5 | <b>TFVuITANQ-H<sub>2</sub>O</b>      |
| 187.1               | <b>IT-28</b>                                     | 377.2               | <b>a<sub>4</sub></b>                             | 604.3 <sup>+2</sup> | <b>y<sub>9</sub>-NH<sub>3</sub><sup>+2</sup></b> | 804.4               | <b>uITANQ</b>                         | 1134.5 | <b>TFVuITANQ-NH<sub>3</sub></b>      |
| 197.1               | <b>IT-H<sub>2</sub>O</b>                         | 382.2               | <b>ITAN-H<sub>2</sub>O</b>                       | 606.3               | <b>TFVu-H<sub>2</sub>O</b>                       | 808.4               | <b>FVuITA</b>                         | 1151.6 | <b>TFVuITANQ</b>                     |
| 200.6 <sup>+2</sup> | <b>y<sub>3</sub>-NH<sub>3</sub><sup>+2</sup></b> | 383.2               | <b>ITAN-NH<sub>3</sub></b>                       | 608.3               | <b>FVuI-28</b>                                   | 810.4               | <b>TFVuIT-28</b>                      | 1163.6 | <b>a<sub>10</sub>-NH<sub>3</sub></b> |
| 209.1 <sup>+2</sup> | <b>y<sub>3</sub><sup>+2</sup></b>                | 387.2               | <b>TANQ-28</b>                                   | 612.8 <sup>+2</sup> | <b>y<sub>9</sub><sup>+2</sup></b>                | 820.4               | <b>TFVuIT-H<sub>2</sub>O</b>          | 1180.6 | <b>a<sub>10</sub></b>                |

|                     |                                                              |       |                                     |                     |                                                               |       |                                     |        |                                      |
|---------------------|--------------------------------------------------------------|-------|-------------------------------------|---------------------|---------------------------------------------------------------|-------|-------------------------------------|--------|--------------------------------------|
| 215.1               | <b>NQ-28</b>                                                 | 387.2 | <b>b<sub>4</sub>-H<sub>2</sub>O</b> | 624.3               | <b>TFVu</b>                                                   | 838.4 | <b>TFVuIT</b>                       | 1190.6 | <b>b<sub>10</sub>-H<sub>2</sub>O</b> |
| 215.1               | <b>IT</b>                                                    | 390.2 | <b>ul</b>                           | 633.3               | <b>VuITA-28</b>                                               | 867.4 | <b>a<sub>7</sub></b>                | 1191.6 | <b>b<sub>10</sub>-NH<sub>3</sub></b> |
| 219.1               | <b>FV-28</b>                                                 | 397.2 | <b>TANQ-H<sub>2</sub>O</b>          | 636.3               | <b>FVuI</b>                                                   | 875.4 | <b>VuITANQ-28</b>                   | 1206.6 | <b>y<sub>9</sub>-H<sub>2</sub>O</b>  |
| 221.1               | <b>TF-28</b>                                                 | 398.2 | <b>TANQ-NH<sub>3</sub></b>          | 643.3               | <b>VuITA-H<sub>2</sub>O</b>                                   | 877.4 | <b>b<sub>7</sub>-H<sub>2</sub>O</b> | 1207.6 | <b>y<sub>9</sub>-NH<sub>3</sub></b>  |
| 226.1               | <b>NQ-NH<sub>3</sub></b>                                     | 400.2 | <b>y<sub>3</sub>-NH<sub>3</sub></b> | 648.3               | <b>uITAN-28</b>                                               | 881.5 | <b>TFVuITA-28</b>                   | 1208.6 | <b>b<sub>10</sub></b>                |
| 231.1               | <b>TF-H<sub>2</sub>O</b>                                     | 400.2 | <b>ITAN</b>                         | 653.3               | <b>a<sub>5</sub></b>                                          | 885.4 | <b>VuITANQ-H<sub>2</sub>O</b>       | 1224.6 | <b>y<sub>9</sub></b>                 |
| 236.1 <sup>+2</sup> | <b>y<sub>4</sub><sup>-</sup>-NH<sub>3</sub><sup>+2</sup></b> | 405.2 | <b>b<sub>4</sub></b>                | 654.3 <sup>+2</sup> | <b>y<sub>10</sub><sup>-</sup>-H<sub>2</sub>O<sup>+2</sup></b> | 886.4 | <b>VuITANQ-NH<sub>3</sub></b>       | 1307.7 | <b>y<sub>10</sub>-H<sub>2</sub>O</b> |
| 243.1               | <b>NQ</b>                                                    | 415.2 | <b>TANQ</b>                         | 654.8 <sup>+2</sup> | <b>y<sub>10</sub><sup>-</sup>-NH<sub>3</sub><sup>+2</sup></b> | 891.4 | <b>TFVuITA-H<sub>2</sub>O</b>       | 1308.6 | <b>y<sub>10</sub>-NH<sub>3</sub></b> |
| 244.6 <sup>+2</sup> | <b>y<sub>4</sub><sup>+2</sup></b>                            | 417.2 | <b>y<sub>3</sub></b>                | 658.3               | <b>uITAN-H<sub>2</sub>O</b>                                   | 894.5 | <b>FVuITAN-28</b>                   | 1325.7 | <b>y<sub>10</sub></b>                |
| 247.1               | <b>FV</b>                                                    | 461.3 | <b>VuI-28</b>                       | 659.3               | <b>uITAN-NH<sub>3</sub></b>                                   | 895.4 | <b>b<sub>7</sub></b>                | 1364.7 | <b>MH-H<sub>2</sub>O</b>             |
| 249.1               | <b>TF</b>                                                    | 463.2 | <b>uIT-28</b>                       | 661.3               | <b>VuITA</b>                                                  | 903.4 | <b>VuITANQ</b>                      | 1365.7 | <b>MH-NH<sub>3</sub></b>             |
| 258.2               | <b>ITA-28</b>                                                | 471.2 | <b>y<sub>4</sub>-NH<sub>3</sub></b> | 663.3               | <b>b<sub>5</sub>-H<sub>2</sub>O</b>                           | 904.4 | <b>FVuITAN-H<sub>2</sub>O</b>       | 1382.7 | <b>MH</b>                            |

## GTFVNITANQR MS/MS on C13 isotope

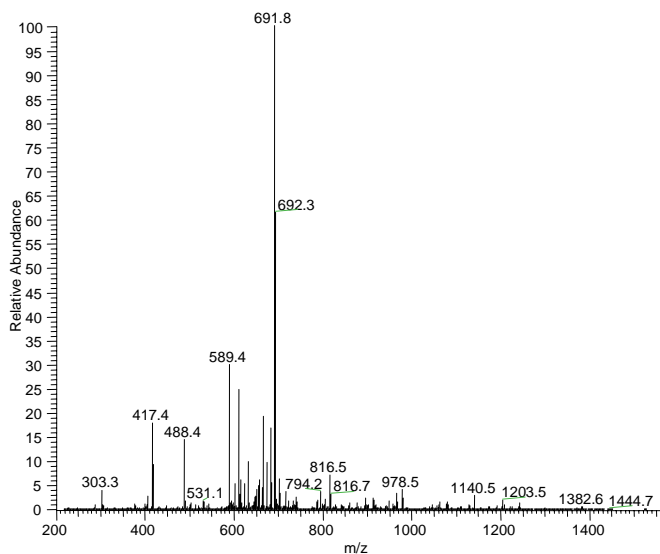

|                    |                                                  |       |                                     |                     |                                                  |       |                             |        |                                     |
|--------------------|--------------------------------------------------|-------|-------------------------------------|---------------------|--------------------------------------------------|-------|-----------------------------|--------|-------------------------------------|
| 70.1               | <b>R</b>                                         | 259.1 | <b>TAN-28</b>                       | 528.3               | <b>ITANQ</b>                                     | 805.4 | <b>VvITA-H<sub>2</sub>O</b> | 1067.5 | <b>FVvITAN-NH<sub>3</sub></b>       |
| 72.1               | <b>V</b>                                         | 268.2 | <b>ITA-H<sub>2</sub>O</b>           | 538.2               | <b>Vv</b>                                        | 810.4 | <b>vITAN-28</b>             | 1071.5 | <b>TFVvITA</b>                      |
| 74.1               | <b>T</b>                                         | 269.1 | <b>TAN-H<sub>2</sub>O</b>           | 552.2               | <b>vl</b>                                        | 815.4 | <b>a<sub>5</sub></b>        | 1084.5 | <b>FVvITAN</b>                      |
| 79.6 <sup>+2</sup> | <b>y<sub>1</sub>-NH<sub>3</sub><sup>+2</sup></b> | 270.1 | <b>TAN-NH<sub>3</sub></b>           | 561.8 <sup>+2</sup> | <b>y<sub>7</sub>-H<sub>2</sub>O<sup>+2</sup></b> | 820.4 | <b>vITAN-H<sub>2</sub>O</b> | 1100.5 | <b>a<sub>8</sub></b>                |
| 84.1               | <b>Q</b>                                         | 278.1 | <b>a<sub>3</sub></b>                | 562.3 <sup>+2</sup> | <b>y<sub>7</sub>-NH<sub>3</sub><sup>+2</sup></b> | 821.3 | <b>vITAN-NH<sub>3</sub></b> | 1110.5 | <b>b<sub>8</sub>-H<sub>2</sub>O</b> |
| 86.1               | <b>I</b>                                         | 286.2 | <b>y<sub>2</sub>-NH<sub>3</sub></b> | 570.8 <sup>+2</sup> | <b>y<sub>7</sub><sup>+2</sup></b>                | 823.4 | <b>VvITA</b>                | 1122.5 | <b>y<sub>7</sub>-H<sub>2</sub>O</b> |

|                     |                                                  |                     |                                                  |                     |                                                   |        |                                     |        |                                      |
|---------------------|--------------------------------------------------|---------------------|--------------------------------------------------|---------------------|---------------------------------------------------|--------|-------------------------------------|--------|--------------------------------------|
| 87.1                | <b>N</b>                                         | 286.2 <sup>+2</sup> | <b>y<sub>5</sub>-H<sub>2</sub>O<sup>+2</sup></b> | 571.3               | <b>y<sub>5</sub>-H<sub>2</sub>O</b>               | 825.4  | <b>b<sub>5</sub>-H<sub>2</sub>O</b> | 1123.5 | <b>y<sub>7</sub>-NH<sub>3</sub></b>  |
| 87.1                | <b>R</b>                                         | 286.2               | <b>ANQ-28</b>                                    | 572.3               | <b>y<sub>5</sub>-NH<sub>3</sub></b>               | 838.4  | <b>vITAN</b>                        | 1128.5 | <b>b<sub>8</sub></b>                 |
| 88.1 <sup>+2</sup>  | <b>y<sub>1</sub><sup>+2</sup></b>                | 286.2               | <b>ITA</b>                                       | 589.3               | <b>y<sub>5</sub></b>                              | 843.4  | <b>b<sub>5</sub></b>                | 1140.5 | <b>y<sub>7</sub></b>                 |
| 100.1               | <b>R</b>                                         | 286.6 <sup>+2</sup> | <b>y<sub>5</sub>-NH<sub>3</sub><sup>+2</sup></b> | 611.3 <sup>+2</sup> | <b>y<sub>8</sub>-H<sub>2</sub>O<sup>+2</sup></b>  | 871.4  | <b>FVvIT-28</b>                     | 1157.6 | <b>TFVvITA N-28</b>                  |
| 101.1               | <b>Q</b>                                         | 287.1               | <b>TAN</b>                                       | 611.8 <sup>+2</sup> | <b>y<sub>8</sub>-NH<sub>3</sub><sup>+2</sup></b>  | 871.4  | <b>TFVvi-28</b>                     | 1167.5 | <b>TFVvITA N-H<sub>2</sub>O</b>      |
| 112.1               | <b>R</b>                                         | 288.1               | <b>b<sub>3</sub>-H<sub>2</sub>O</b>              | 620.3 <sup>+2</sup> | <b>y<sub>8</sub><sup>+2</sup></b>                 | 881.4  | <b>FVvIT-H<sub>2</sub>O</b>         | 1168.5 | <b>TFVvITA N-NH<sub>3</sub></b>      |
| 120.1               | <b>F</b>                                         | 295.2 <sup>+2</sup> | <b>y<sub>5</sub><sup>+2</sup></b>                | 623.3               | <b>Vvi-28</b>                                     | 881.4  | <b>TFVvi-H<sub>2</sub>O</b>         | 1184.6 | <b>FVvITAN Q-28</b>                  |
| 129.1               | <b>Q</b>                                         | 297.1               | <b>ANQ-NH<sub>3</sub></b>                        | 625.3               | <b>vIT-28</b>                                     | 899.4  | <b>TFVvi</b>                        | 1185.6 | <b>TFVvITA N</b>                     |
| 131.1               | <b>a<sub>2</sub></b>                             | 303.2               | <b>y<sub>2</sub></b>                             | 635.3               | <b>vIT-H<sub>2</sub>O</b>                         | 899.4  | <b>FVvIT</b>                        | 1194.6 | <b>FVvITAN Q-H<sub>2</sub>O</b>      |
| 141.1               | <b>b<sub>2</sub>-H<sub>2</sub>O</b>              | 306.1               | <b>b<sub>3</sub></b>                             | 651.3               | <b>Vvi</b>                                        | 909.4  | <b>VvITAN-28</b>                    | 1195.5 | <b>FVvITAN Q-NH<sub>3</sub></b>      |
| 143.6 <sup>+2</sup> | <b>y<sub>2</sub>-NH<sub>3</sub><sup>+2</sup></b> | 314.1               | <b>ANQ</b>                                       | 653.3               | <b>vIT</b>                                        | 919.4  | <b>VvITAN-H<sub>2</sub>O</b>        | 1197.6 | <b>a<sub>9</sub>-NH<sub>3</sub></b>  |
| 145.1               | <b>TA-28</b>                                     | 320.2               | <b>TFV-28</b>                                    | 657.3               | <b>FVv-28</b>                                     | 920.4  | <b>VvITAN-NH<sub>3</sub></b>        | 1212.6 | <b>FVvITAN Q</b>                     |
| 152.1 <sup>+2</sup> | <b>y<sub>2</sub><sup>+2</sup></b>                | 330.2               | <b>TFV-H<sub>2</sub>O</b>                        | 684.4               | <b>y<sub>6</sub>-H<sub>2</sub>O</b>               | 928.5  | <b>a<sub>6</sub></b>                | 1214.6 | <b>a<sub>9</sub></b>                 |
| 155.1               | <b>TA-H<sub>2</sub>O</b>                         | 342.7 <sup>+2</sup> | <b>y<sub>6</sub>-H<sub>2</sub>O<sup>+2</sup></b> | 684.8 <sup>+2</sup> | <b>y<sub>9</sub>-H<sub>2</sub>O<sup>+2</sup></b>  | 937.4  | <b>VvITAN</b>                       | 1221.6 | <b>y<sub>8</sub>-H<sub>2</sub>O</b>  |
| 158.1               | <b>AN-28</b>                                     | 343.2 <sup>+2</sup> | <b>y<sub>6</sub>-NH<sub>3</sub><sup>+2</sup></b> | 685.3               | <b>FVv</b>                                        | 938.4  | <b>vITANQ-28</b>                    | 1222.6 | <b>y<sub>8</sub>-NH<sub>3</sub></b>  |
| 158.1               | <b>y<sub>1</sub>-NH<sub>3</sub></b>              | 348.2               | <b>TFV</b>                                       | 685.3 <sup>+2</sup> | <b>y<sub>9</sub>-NH<sub>3</sub><sup>+2</sup></b>  | 938.4  | <b>b<sub>6</sub>-H<sub>2</sub>O</b> | 1224.6 | <b>b<sub>9</sub>-H<sub>2</sub>O</b>  |
| 159.1               | <b>b<sub>2</sub></b>                             | 351.7 <sup>+2</sup> | <b>y<sub>6</sub><sup>+2</sup></b>                | 685.4               | <b>y<sub>6</sub>-NH<sub>3</sub></b>               | 942.5  | <b>FVvITA-28</b>                    | 1225.5 | <b>b<sub>9</sub>-NH<sub>3</sub></b>  |
| 169.1               | <b>AN-NH<sub>3</sub></b>                         | 372.2               | <b>ITAN-28</b>                                   | 693.8 <sup>+2</sup> | <b>y<sub>9</sub><sup>+2</sup></b>                 | 948.4  | <b>vITANQ-H<sub>2</sub>O</b>        | 1239.6 | <b>y<sub>8</sub></b>                 |
| 173.1               | <b>TA</b>                                        | 377.2               | <b>a<sub>4</sub></b>                             | 696.3               | <b>vITA-28</b>                                    | 949.4  | <b>vITANQ-NH<sub>3</sub></b>        | 1242.6 | <b>b<sub>9</sub></b>                 |
| 175.1               | <b>y<sub>1</sub></b>                             | 382.2               | <b>ITAN-H<sub>2</sub>O</b>                       | 702.4               | <b>y<sub>6</sub></b>                              | 952.5  | <b>FVvITA-H<sub>2</sub>O</b>        | 1285.6 | <b>TFVvITA NQ-28</b>                 |
| 186.1               | <b>AN</b>                                        | 383.2               | <b>ITAN-NH<sub>3</sub></b>                       | 706.3               | <b>vITA-H<sub>2</sub>O</b>                        | 956.4  | <b>b<sub>6</sub></b>                | 1295.6 | <b>TFVvITA NQ-H<sub>2</sub>O</b>     |
| 187.1               | <b>IT-28</b>                                     | 387.2               | <b>TANQ-28</b>                                   | 724.3               | <b>vITA</b>                                       | 966.4  | <b>vITANQ</b>                       | 1296.6 | <b>TFVvITA NQ-NH<sub>3</sub></b>     |
| 197.1               | <b>IT-H<sub>2</sub>O</b>                         | 387.2               | <b>b<sub>4</sub>-H<sub>2</sub>O</b>              | 724.4               | <b>VvIT-28</b>                                    | 970.5  | <b>FVvITA</b>                       | 1313.6 | <b>TFVvITA NQ</b>                    |
| 200.6 <sup>+2</sup> | <b>y<sub>3</sub>-NH<sub>3</sub><sup>+2</sup></b> | 397.2               | <b>TANQ-H<sub>2</sub>O</b>                       | 734.3               | <b>VvIT-H<sub>2</sub>O</b>                        | 972.5  | <b>TFVvIT-28</b>                    | 1325.6 | <b>a<sub>10</sub>-NH<sub>3</sub></b> |
| 209.1 <sup>+2</sup> | <b>y<sub>3</sub><sup>+2</sup></b>                | 398.2               | <b>TANQ-NH<sub>3</sub></b>                       | 735.4 <sup>+2</sup> | <b>y<sub>10</sub>-H<sub>2</sub>O<sup>+2</sup></b> | 982.5  | <b>TFVvIT-H<sub>2</sub>O</b>        | 1342.6 | <b>a<sub>10</sub></b>                |
| 215.1               | <b>NQ-28</b>                                     | 400.2               | <b>y<sub>3</sub>-NH<sub>3</sub></b>              | 735.9 <sup>+2</sup> | <b>y<sub>10</sub>-NH<sub>3</sub><sup>+2</sup></b> | 1000.5 | <b>TFVvIT</b>                       | 1352.6 | <b>b<sub>10</sub>-H<sub>2</sub>O</b> |
| 215.1               | <b>IT</b>                                        | 400.2               | <b>ITAN</b>                                      | 744.4 <sup>+2</sup> | <b>y<sub>10</sub><sup>+2</sup></b>                | 1029.5 | <b>a<sub>7</sub></b>                | 1353.6 | <b>b<sub>10</sub>-NH<sub>3</sub></b> |
| 219.1               | <b>FV-28</b>                                     | 405.2               | <b>b<sub>4</sub></b>                             | 752.4               | <b>VvIT</b>                                       | 1037.5 | <b>VvITANQ-28</b>                   | 1368.7 | <b>y<sub>9</sub>-H<sub>2</sub>O</b>  |
| 221.1               | <b>TF-28</b>                                     | 415.2               | <b>TANQ</b>                                      | 758.3               | <b>TFVv-28</b>                                    | 1039.5 | <b>b<sub>7</sub>-H<sub>2</sub>O</b> | 1369.6 | <b>y<sub>9</sub>-NH<sub>3</sub></b>  |
| 226.1               | <b>NQ-NH<sub>3</sub></b>                         | 417.2               | <b>y<sub>3</sub></b>                             | 763.9 <sup>+2</sup> | <b>MH-H<sub>2</sub>O<sup>+2</sup></b>             | 1043.5 | <b>TFVvITA-28</b>                   | 1370.6 | <b>b<sub>10</sub></b>                |



|                     |                                                  |       |                                     |                     |                                       |        |                               |        |                                      |
|---------------------|--------------------------------------------------|-------|-------------------------------------|---------------------|---------------------------------------|--------|-------------------------------|--------|--------------------------------------|
| 231.1               | <b>TF-H<sub>2</sub>O</b>                         | 471.2 | <b>y<sub>4</sub>-NH<sub>3</sub></b> | 764.4 <sup>+2</sup> | <b>MH-NH<sub>3</sub><sup>+2</sup></b> | 1047.5 | <b>VvITANQ-H<sub>2</sub>O</b> | 1386.7 | <b>y<sub>9</sub></b>                 |
| 236.1 <sup>+2</sup> | <b>y<sub>4</sub>-NH<sub>3</sub><sup>+2</sup></b> | 488.3 | <b>y<sub>4</sub></b>                | 768.3               | <b>TFVv-H<sub>2</sub>O</b>            | 1048.5 | <b>VvITANQ-NH<sub>3</sub></b> | 1469.7 | <b>y<sub>10</sub>-H<sub>2</sub>O</b> |
| 243.1               | <b>NQ</b>                                        | 500.3 | <b>ITANQ-28</b>                     | 770.4               | <b>FVvi-28</b>                        | 1053.5 | <b>TFVvITA-H<sub>2</sub>O</b> | 1470.7 | <b>y<sub>10</sub>-NH<sub>3</sub></b> |
| 244.6 <sup>+2</sup> | <b>y<sub>4</sub><sup>+2</sup></b>                | 510.2 | <b>Vv-28</b>                        | 772.9 <sup>+2</sup> | <b>MH<sup>+2</sup></b>                | 1056.5 | <b>FVvITAN-28</b>             | 1487.7 | <b>y<sub>10</sub></b>                |
| 247.1               | <b>FV</b>                                        | 510.3 | <b>ITANQ-H<sub>2</sub>O</b>         | 786.3               | <b>TFVv</b>                           | 1057.5 | <b>b<sub>7</sub></b>          | 1526.7 | <b>MH-H<sub>2</sub>O</b>             |
| 249.1               | <b>TF</b>                                        | 511.3 | <b>ITANQ-NH<sub>3</sub></b>         | 795.4               | <b>VvITA-28</b>                       | 1065.5 | <b>VvITANQ</b>                | 1527.7 | <b>MH-NH<sub>3</sub></b>             |
| 258.2               | <b>ITA-28</b>                                    | 524.2 | <b>vi-28</b>                        | 798.4               | <b>FVvi</b>                           | 1066.5 | <b>FVvITAN-H<sub>2</sub>O</b> | 1544.7 | <b>MH</b>                            |

## GANLTIYSGGWVDVHK MS/MS on C13 isotope

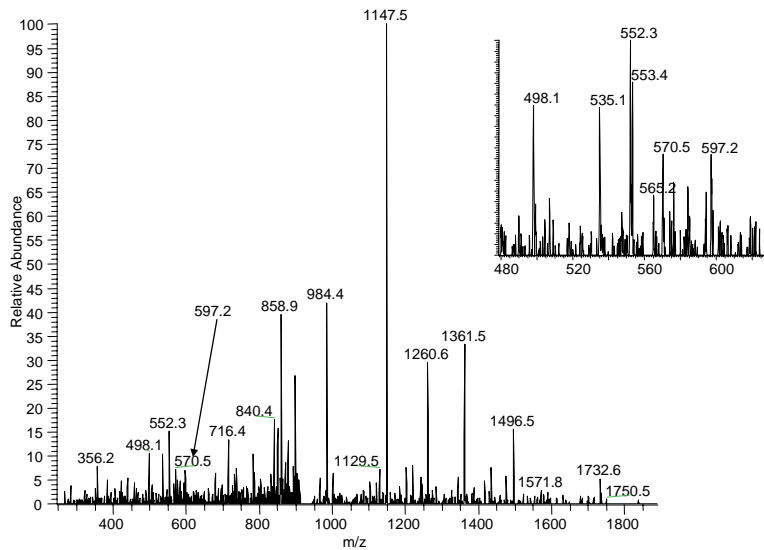

|                    |                                                  |                     |                                                  |       |                             |       |                               |        |                                  |
|--------------------|--------------------------------------------------|---------------------|--------------------------------------------------|-------|-----------------------------|-------|-------------------------------|--------|----------------------------------|
| 60.0               | <b>S</b>                                         | 314.2               | <b>VDV</b>                                       | 494.3 | <b>TIYSG-28</b>             | 739.4 | <b>uLTIY-28</b>               | 1039.5 | <b>AuLTIYSGG</b>                 |
| 65.6 <sup>+2</sup> | <b>y<sub>1</sub>-NH<sub>3</sub><sup>+2</sup></b> | 315.2               | <b>GWV-28</b>                                    | 497.2 | <b>GGWVD-H<sub>2</sub>O</b> | 745.4 | <b>IYSGGWV-H<sub>2</sub>O</b> | 1050.5 | <b>TIYSGGWVDV-28</b>             |
| 72.1               | <b>V</b>                                         | 320.1               | <b>Au-28</b>                                     | 498.3 | <b>y<sub>4</sub></b>        | 747.3 | <b>YSGGWVD-H<sub>2</sub>O</b> | 1060.5 | <b>TIYSGGWVDV-H<sub>2</sub>O</b> |
| 74.1               | <b>T</b>                                         | 322.8 <sup>+3</sup> | <b>y<sub>9</sub>-H<sub>2</sub>O<sup>+3</sup></b> | 500.3 | <b>WVDV</b>                 | 747.3 | <b>TIYSGGW-H<sub>2</sub>O</b> | 1064.5 | <b>LTIYSGGWVD-28</b>             |
| 74.1 <sup>+2</sup> | <b>y<sub>1</sub><sup>+2</sup></b>                | 323.2 <sup>+3</sup> | <b>y<sub>9</sub>-NH<sub>3</sub><sup>+3</sup></b> | 504.2 | <b>TIYSG-H<sub>2</sub>O</b> | 749.4 | <b>uLTIY-H<sub>2</sub>O</b>   | 1068.5 | <b>a<sub>10</sub></b>            |
| 84.1               | <b>K</b>                                         | 324.2               | <b>DVH-28</b>                                    | 515.2 | <b>GGWVD</b>                | 751.4 | <b>GGWVDVH</b>                | 1074.5 | <b>LTIYSGGWVD-H<sub>2</sub>O</b> |

|                            |                                      |                     |                                          |                     |                                          |       |                               |        |                                  |
|----------------------------|--------------------------------------|---------------------|------------------------------------------|---------------------|------------------------------------------|-------|-------------------------------|--------|----------------------------------|
| 86.1                       | L                                    | 328.2               | LTI                                      | 518.2               | $b_4$                                    | 763.4 | IYSGGWV                       | 1078.5 | $b_{10}$ -H <sub>2</sub> O       |
| 86.1                       | I                                    | 328.8 <sup>+3</sup> | $y_9^{+3}$                               | 522.3               | TIYSG                                    | 765.3 | YSGGWVD                       | 1078.5 | TIYSGGWVDV                       |
| 87.1                       | GG-28                                | 334.2               | DVH-H <sub>2</sub> O                     | 523.2               | YSGGW-28                                 | 765.4 | TIYSGGW                       | 1086.5 | IYSGGWVDV<br>H-28                |
| 88.0                       | D                                    | 336.2               | IYS-28                                   | 529.3               | GWVDV-28                                 | 765.4 | $y_6$ -H <sub>2</sub> O       | 1092.5 | LTIYSGGWVD                       |
| 89.7 <sup>+3</sup>         | $y_2$ -NH <sub>3</sub> <sup>+3</sup> | 337.2               | YSGG-28                                  | 533.2               | YSGGW-H <sub>2</sub> O                   | 766.4 | $y_6$ -NH <sub>3</sub>        | 1096.5 | $b_{10}$                         |
| 95.4 <sup>+3</sup>         | $y_2^{+3}$                           | 343.2               | GWV                                      | 534.3               | AuLT-28                                  | 767.4 | uLTIY                         | 1096.5 | IYSGGWVDV<br>H-H <sub>2</sub> O  |
| 101.1                      | $a_2$                                | 346.2               | IYS-H <sub>2</sub> O                     | 539.3               | GWVDV-H <sub>2</sub> O                   | 783.4 | $y_6$                         | 1114.5 | IYSGGWVDV<br>H                   |
| 101.1                      | K                                    | 347.1               | YSGG-H <sub>2</sub> O                    | 544.3               | AuLT-H <sub>2</sub> O                    | 810.4 | SGGWVDVH<br>-28               | 1126.5 | uLTIYSGGW-<br>28                 |
| 110.1                      | H                                    | 348.1               | Au                                       | 550.3               | LTIYS-28                                 | 810.4 | AuLTIY-28                     | 1129.5 | $y_{10}$ -H <sub>2</sub> O       |
| 115.1                      | GG                                   | 350.2               | TIY-28                                   | 551.2               | YSGGW                                    | 820.4 | SGGWVDVH<br>-H <sub>2</sub> O | 1130.5 | $y_{10}$ -NH <sub>3</sub>        |
| 117.1                      | SG-28                                | 352.2               | DVH                                      | 551.3               | TIYSGG-28                                | 820.4 | AuLTIY-H <sub>2</sub> O       | 1136.5 | uLTIYSGGW-<br>H <sub>2</sub> O   |
| 122.7 <sup>+3</sup>        | $y_3$ -NH <sub>3</sub> <sup>+3</sup> | 360.2               | SGGW-28                                  | 557.3               | GWVDV                                    | 822.4 | $y_7$ -H <sub>2</sub> O       | 1147.6 | $y_{10}$                         |
| 126.1                      | K                                    | 360.2               | TIY-H <sub>2</sub> O                     | 560.3               | LTIYS-H <sub>2</sub> O                   | 823.4 | $y_7$ -NH <sub>3</sub>        | 1154.5 | uLTIYSGGW                        |
| 127.1                      | SG-H <sub>2</sub> O                  | 362.2               | uL-28                                    | 561.3               | TIYSGG-H <sub>2</sub> O                  | 826.4 | uLTIYS-28                     | 1163.6 | LTIYSGGWVD<br>V-28               |
| 128.4 <sup>+3</sup>        | $y_3^{+3}$                           | 364.2               | IYS                                      | 562.3               | AuLT                                     | 836.4 | YSGGWVDV<br>-28               | 1173.6 | LTIYSGGWVD<br>V-H <sub>2</sub> O |
| 129.1                      | $b_2$                                | 365.1               | YSGG                                     | 565.3 <sup>+2</sup> | $y_{10}$ -H <sub>2</sub> O <sup>+2</sup> | 836.4 | uLTIYS-H <sub>2</sub> O       | 1187.6 | TIYSGGWVDV<br>H-28               |
| 129.1                      | K                                    | 366.2               | $y_3$ -NH <sub>3</sub>                   | 565.8 <sup>+2</sup> | $y_{10}$ -NH <sub>3</sub> <sup>+2</sup>  | 836.4 | TIYSGGWV-<br>28               | 1191.6 | LTIYSGGWVD<br>V                  |
| 130.1                      | $y_1$ -NH <sub>3</sub>               | 370.2               | SGGW-<br>H <sub>2</sub> O                | 574.3               | SGGWVD-28                                | 838.4 | SGGWVDVH                      | 1197.6 | TIYSGGWVDV<br>H-H <sub>2</sub> O |
| 134.07<br>62 <sup>+2</sup> | $y_2$ -NH <sub>3</sub> <sup>+2</sup> | 372.2               | GGWV-28                                  | 574.3 <sup>+2</sup> | $y_{10}^{+2}$                            | 838.4 | AuLTIY                        | 1197.6 | AuLTIYSGGW<br>-28                |
| 136.1                      | Y                                    | 373.2               | WVD-28                                   | 576.3               | uLTI-28                                  | 840.4 | $y_7$                         | 1207.6 | AuLTIYSGGW<br>-H <sub>2</sub> O  |
| 138.1                      | H                                    | 377.2               | $a_3$                                    | 578.3 <sup>+3</sup> | $y_{14}$ -H <sub>2</sub> O <sup>+3</sup> | 846.4 | YSGGWVDV<br>-H <sub>2</sub> O | 1215.6 | TIYSGGWVDV<br>H                  |
| 142.6 <sup>+2</sup>        | $y_2^{+2}$                           | 377.2 <sup>+3</sup> | $y_{10}$ -H <sub>2</sub> O <sup>+3</sup> | 578.3               | LTIYS                                    | 846.4 | TIYSGGWV-<br>H <sub>2</sub> O | 1225.6 | AuLTIYSGGW                       |
| 145.1                      | SG                                   | 377.5 <sup>+3</sup> | $y_{10}$ -NH <sub>3</sub> <sup>+3</sup>  | 578.6 <sup>+3</sup> | $y_{14}$ -NH <sub>3</sub> <sup>+3</sup>  | 850.4 | IYSGGWVD-<br>28               | 1225.6 | uLTIYSGGWV<br>-28                |

|                     |                                                  |                     |                                                   |                     |                                                   |                     |                                                   |        |                                      |
|---------------------|--------------------------------------------------|---------------------|---------------------------------------------------|---------------------|---------------------------------------------------|---------------------|---------------------------------------------------|--------|--------------------------------------|
| 147.1               | <b>y<sub>1</sub></b>                             | 378.2               | <b>TIY</b>                                        | 579.3               | <b>TIYSGG</b>                                     | 850.4               | <b>LTIYSGGW-28</b>                                | 1235.6 | <b>uLTIYSGGWV-H<sub>2</sub>O</b>     |
| 159.1               | <b>W</b>                                         | 383.2               | <b>WVD-H<sub>2</sub>O</b>                         | 579.3               | <b>y<sub>5</sub>-H<sub>2</sub>O</b>               | 852.9 <sup>+2</sup> | <b>a<sub>15</sub><sup>+2</sup></b>                | 1242.6 | <b>y<sub>11</sub>-H<sub>2</sub>O</b> |
| 160.8 <sup>+3</sup> | <b>y<sub>4</sub>-H<sub>2</sub>O<sup>+3</sup></b> | 383.2 <sup>+3</sup> | <b>y<sub>10</sub><sup>+3</sup></b>                | 580.3               | <b>y<sub>5</sub>-NH<sub>3</sub></b>               | 854.4               | <b>uLTIYS</b>                                     | 1243.6 | <b>y<sub>11</sub>-NH<sub>3</sub></b> |
| 161.1 <sup>+3</sup> | <b>y<sub>4</sub>-NH<sub>3</sub><sup>+3</sup></b> | 383.2 <sup>+2</sup> | <b>y<sub>6</sub>-H<sub>2</sub>O<sup>+2</sup></b>  | 584.2               | <b>SGGWVD-H<sub>2</sub>O</b>                      | 857.9 <sup>+2</sup> | <b>b<sub>15</sub>-H<sub>2</sub>O<sup>+2</sup></b> | 1253.6 | <b>uLTIYSGGWV</b>                    |
| 166.8 <sup>+3</sup> | <b>y<sub>4</sub><sup>+3</sup></b>                | 383.2               | <b>y<sub>3</sub></b>                              | 584.3 <sup>+3</sup> | <b>y<sub>14</sub><sup>+3</sup></b>                | 860.4               | <b>IYSGGWVD-H<sub>2</sub>O</b>                    | 1254.6 | <b>a<sub>11</sub></b>                |
| 174.1               | <b>SGG-28</b>                                    | 383.7 <sup>+2</sup> | <b>y<sub>6</sub>-NH<sub>3</sub><sup>+2</sup></b>  | 586.3               | <b>GGWVDV-28</b>                                  | 860.4               | <b>LTIYSGGW-H<sub>2</sub>O</b>                    | 1260.6 | <b>y<sub>11</sub></b>                |
| 183.6 <sup>+2</sup> | <b>y<sub>3</sub>-NH<sub>3</sub><sup>+2</sup></b> | 388.2               | <b>SGGW</b>                                       | 586.3               | <b>uLTI-H<sub>2</sub>O</b>                        | 864.4               | <b>YSGGWVDV</b>                                   | 1264.6 | <b>b<sub>11</sub>-H<sub>2</sub>O</b> |
| 184.1               | <b>SGG-H<sub>2</sub>O</b>                        | 390.2               | <b>uL</b>                                         | 591.3               | <b>a<sub>5</sub></b>                              | 864.4               | <b>TIYSGGWV</b>                                   | 1282.6 | <b>b<sub>11</sub></b>                |
| 187.1               | <b>DV-28</b>                                     | 392.2 <sup>+2</sup> | <b>y<sub>6</sub><sup>+2</sup></b>                 | 596.3               | <b>GGWVDV-H<sub>2</sub>O</b>                      | 866.9 <sup>+2</sup> | <b>b<sub>15</sub><sup>+2</sup></b>                | 1296.6 | <b>AuLTIYSGGWV-28</b>                |
| 187.1               | <b>VD-28</b>                                     | 393.2               | <b>IYSG-28</b>                                    | 597.3               | <b>y<sub>5</sub></b>                              | 866.9 <sup>+2</sup> | <b>y<sub>14</sub>-H<sub>2</sub>O<sup>+2</sup></b> | 1300.7 | <b>LTIYSGGWVDVH-28</b>               |
| 187.1               | <b>LT-28</b>                                     | 400.2               | <b>GGWV</b>                                       | 601.3               | <b>b<sub>5</sub>-H<sub>2</sub>O</b>               | 867.4 <sup>+2</sup> | <b>y<sub>14</sub>-NH<sub>3</sub><sup>+2</sup></b> | 1306.6 | <b>AuLTIYSGGWV-H<sub>2</sub>O</b>    |
| 187.1               | <b>TI-28</b>                                     | 401.2               | <b>WVD</b>                                        | 602.0 <sup>+3</sup> | <b>y<sub>15</sub>-H<sub>2</sub>O<sup>+3</sup></b> | 867.4               | <b>a<sub>7</sub></b>                              | 1310.7 | <b>LTIYSGGWVDVH-H<sub>2</sub>O</b>   |
| 192.1 <sup>+2</sup> | <b>y<sub>3</sub><sup>+2</sup></b>                | 403.2               | <b>IYSG-H<sub>2</sub>O</b>                        | 602.3               | <b>SGGWVD</b>                                     | 875.9 <sup>+2</sup> | <b>b<sub>15</sub>+H<sub>2</sub>O<sup>+2</sup></b> | 1324.6 | <b>AuLTIYSGGWV</b>                   |
| 193.8 <sup>+3</sup> | <b>y<sub>5</sub>-H<sub>2</sub>O<sup>+3</sup></b> | 405.2               | <b>b<sub>3</sub></b>                              | 602.3 <sup>+3</sup> | <b>y<sub>15</sub>-NH<sub>3</sub><sup>+3</sup></b> | 875.9 <sup>+2</sup> | <b>y<sub>14</sub><sup>+2</sup></b>                | 1328.7 | <b>LTIYSGGWVDVH</b>                  |
| 194.1 <sup>+3</sup> | <b>y<sub>5</sub>-NH<sub>3</sub><sup>+3</sup></b> | 411.7 <sup>+2</sup> | <b>y<sub>7</sub>-H<sub>2</sub>O<sup>+2</sup></b>  | 604.3               | <b>uLTI</b>                                       | 877.4               | <b>b<sub>7</sub>-H<sub>2</sub>O</b>               | 1340.6 | <b>uLTIYSGGWVD-28</b>                |
| 197.1               | <b>DV-H<sub>2</sub>O</b>                         | 412.2 <sup>+2</sup> | <b>y<sub>7</sub>-NH<sub>3</sub><sup>+2</sup></b>  | 607.3               | <b>LTIYSG-28</b>                                  | 878.4               | <b>IYSGGWVD</b>                                   | 1343.7 | <b>y<sub>12</sub>-H<sub>2</sub>O</b> |
| 197.1               | <b>VD-H<sub>2</sub>O</b>                         | 414.9 <sup>+3</sup> | <b>y<sub>11</sub>-H<sub>2</sub>O<sup>+3</sup></b> | 608.0 <sup>+3</sup> | <b>y<sub>15</sub><sup>+3</sup></b>                | 878.4               | <b>LTIYSGGW</b>                                   | 1344.7 | <b>y<sub>12</sub>-NH<sub>3</sub></b> |
| 197.1               | <b>TI-H<sub>2</sub>O</b>                         | 415.2 <sup>+3</sup> | <b>y<sub>11</sub>-NH<sub>3</sub><sup>+3</sup></b> | 609.3               | <b>WVDVH-28</b>                                   | 879.4               | <b>y<sub>8</sub>-H<sub>2</sub>O</b>               | 1350.6 | <b>uLTIYSGGWVD-H<sub>2</sub>O</b>    |
| 197.1               | <b>LT-H<sub>2</sub>O</b>                         | 420.7 <sup>+2</sup> | <b>y<sub>7</sub><sup>+2</sup></b>                 | 614.3               | <b>GGWVDV</b>                                     | 880.4               | <b>y<sub>8</sub>-NH<sub>3</sub></b>               | 1353.7 | <b>a<sub>12</sub></b>                |
| 199.8 <sup>+3</sup> | <b>y<sub>5</sub><sup>+3</sup></b>                | 420.9 <sup>+3</sup> | <b>y<sub>11</sub><sup>+3</sup></b>                | 617.3               | <b>LTIYSG-H<sub>2</sub>O</b>                      | 883.4               | <b>uLTIYSG-28</b>                                 | 1361.7 | <b>y<sub>12</sub></b>                |
| 202.1               | <b>SGG</b>                                       | 421.2               | <b>IYSG</b>                                       | 619.3               | <b>b<sub>5</sub></b>                              | 893.4               | <b>uLTIYSG-H<sub>2</sub>O</b>                     | 1363.7 | <b>b<sub>12</sub>-H<sub>2</sub>O</b> |
| 209.1               | <b>VH-28</b>                                     | 423.2               | <b>VDVH-28</b>                                    | 619.3               | <b>WVDVH-H<sub>2</sub>O</b>                       | 895.4               | <b>b<sub>7</sub></b>                              | 1368.6 | <b>uLTIYSGGWVD</b>                   |
| 215.1               | <b>VD</b>                                        | 430.2               | <b>GWVD-28</b>                                    | 621.0 <sup>+3</sup> | <b>MH-H<sub>2</sub>O<sup>+3</sup></b>             | 897.5               | <b>AuLTIYS-28</b>                                 | 1381.7 | <b>b<sub>12</sub></b>                |

|                     |                                                  |                            |                                                   |                     |                                                   |                     |                                                   |        |                                          |
|---------------------|--------------------------------------------------|----------------------------|---------------------------------------------------|---------------------|---------------------------------------------------|---------------------|---------------------------------------------------|--------|------------------------------------------|
| 215.1               | <b>DV</b>                                        | 433.2                      | <b>VDVH-H<sub>2</sub>O</b>                        | 621.3 <sup>+3</sup> | <b>MH-NH<sub>3</sub><sup>+3</sup></b>             | 897.5               | <b>y<sub>8</sub></b>                              | 1411.7 | <b>AuLTIYSGGW<br/>VD-28</b>              |
| 215.1               | <b>TI</b>                                        | 433.2                      | <b>AuL-28</b>                                     | 621.8 <sup>+2</sup> | <b>y<sub>11</sub>-H<sub>2</sub>O<sup>+2</sup></b> | 902.5 <sup>+2</sup> | <b>y<sub>15</sub>-H<sub>2</sub>O<sup>+2</sup></b> | 1421.7 | <b>AuLTIYSGGW<br/>VD-H<sub>2</sub>O</b>  |
| 215.1               | <b>LT</b>                                        | 437.2                      | <b>TIYS-28</b>                                    | 622.3               | <b>YSGGWV-28</b>                                  | 902.9 <sup>+2</sup> | <b>y<sub>15</sub>-NH<sub>3</sub><sup>+2</sup></b> | 1439.7 | <b>AuLTIYSGGW<br/>VD</b>                 |
| 216.1               | <b>GW-28</b>                                     | 440.2                      | <b>GWVD-<br/>H<sub>2</sub>O</b>                   | 622.3 <sup>+2</sup> | <b>y<sub>11</sub>-NH<sub>3</sub><sup>+2</sup></b> | 907.4               | <b>AuLTIYS-<br/>H<sub>2</sub>O</b>                | 1439.7 | <b>uLTIYSGGWV<br/>DV-28</b>              |
| 223.1               | <b>YS-28</b>                                     | 440.22<br>72 <sup>+2</sup> | <b>y<sub>8</sub>-H<sub>2</sub>O<sup>+2</sup></b>  | 627.0 <sup>+3</sup> | <b>MH<sup>+3</sup></b>                            | 911.4               | <b>uLTIYSG</b>                                    | 1449.7 | <b>uLTIYSGGWV<br/>DV-H<sub>2</sub>O</b>  |
| 233.1               | <b>YS-H<sub>2</sub>O</b>                         | 440.71<br>92 <sup>+2</sup> | <b>y<sub>8</sub>-NH<sub>3</sub><sup>+2</sup></b>  | 630.8 <sup>+2</sup> | <b>y<sub>11</sub><sup>+2</sup></b>                | 911.5 <sup>+2</sup> | <b>y<sub>15</sub><sup>+2</sup></b>                | 1456.8 | <b>y<sub>13</sub>-H<sub>2</sub>O</b>     |
| 237.1               | <b>VH</b>                                        | 447.2                      | <b>TIYS-H<sub>2</sub>O</b>                        | 632.3               | <b>YSGGWV-H<sub>2</sub>O</b>                      | 925.5               | <b>AuLTIYS</b>                                    | 1457.7 | <b>y<sub>13</sub>-NH<sub>3</sub></b>     |
| 240.6 <sup>+2</sup> | <b>y<sub>4</sub>-H<sub>2</sub>O<sup>+2</sup></b> | 448.6 <sup>+3</sup>        | <b>y<sub>12</sub>-H<sub>2</sub>O<sup>+3</sup></b> | 635.3               | <b>LTIYSG</b>                                     | 931.0 <sup>+2</sup> | <b>MH-H<sub>2</sub>O<sup>+2</sup></b>             | 1467.7 | <b>uLTIYSGGWV<br/>DV</b>                 |
| 241.1 <sup>+2</sup> | <b>y<sub>4</sub>-NH<sub>3</sub><sup>+2</sup></b> | 448.9 <sup>+3</sup>        | <b>y<sub>12</sub>-NH<sub>3</sub><sup>+3</sup></b> | 636.3               | <b>IYSGGW-28</b>                                  | 931.5 <sup>+2</sup> | <b>MH-NH<sub>3</sub><sup>+2</sup></b>             | 1468.7 | <b>a<sub>13</sub></b>                    |
| 244.1               | <b>GW</b>                                        | 449.2 <sup>+2</sup>        | <b>y<sub>8</sub><sup>+2</sup></b>                 | 637.3               | <b>WVDVH</b>                                      | 940.0 <sup>+2</sup> | <b>MH<sup>+2</sup></b>                            | 1474.8 | <b>y<sub>13</sub></b>                    |
| 249.2               | <b>IY-28</b>                                     | 450.2                      | <b>IYSGG-28</b>                                   | 646.3               | <b>IYSGGW-H<sub>2</sub>O</b>                      | 940.5               | <b>uLTIYSGG-<br/>28</b>                           | 1478.7 | <b>b<sub>13</sub>-H<sub>2</sub>O</b>     |
| 249.6 <sup>+2</sup> | <b>y<sub>4</sub><sup>+2</sup></b>                | 451.2                      | <b>VDVH</b>                                       | 647.4               | <b>AuLTI-28</b>                                   | 949.5               | <b>IYSGGWVD<br/>V-28</b>                          | 1496.7 | <b>b<sub>13</sub></b>                    |
| 251.1               | <b>YS</b>                                        | 454.6 <sup>+3</sup>        | <b>y<sub>12</sub><sup>+3</sup></b>                | 650.3               | <b>YSGGWV</b>                                     | 949.5               | <b>LTIYSGGWV<br/>-28</b>                          | 1510.7 | <b>AuLTIYSGGW<br/>VDV-28</b>             |
| 255.8 <sup>+3</sup> | <b>y<sub>6</sub>-H<sub>2</sub>O<sup>+3</sup></b> | 458.2                      | <b>GWVD</b>                                       | 657.3               | <b>AuLTI-H<sub>2</sub>O</b>                       | 950.4               | <b>uLTIYSGG-<br/>H<sub>2</sub>O</b>               | 1520.7 | <b>AuLTIYSGGW<br/>VDV-H<sub>2</sub>O</b> |
| 256.1 <sup>+3</sup> | <b>y<sub>6</sub>-NH<sub>3</sub><sup>+3</sup></b> | 459.2                      | <b>SGGWV-<br/>28</b>                              | 664.3               | <b>IYSGGW</b>                                     | 951.5               | <b>TIYSGGWV<br/>D-28</b>                          | 1538.7 | <b>AuLTIYSGGW<br/>VDV</b>                |
| 258.2               | <b>WV-28</b>                                     | 460.2                      | <b>IYSGG-<br/>H<sub>2</sub>O</b>                  | 664.4               | <b>LTIYSGG-28</b>                                 | 954.5               | <b>a<sub>8</sub></b>                              | 1567.8 | <b>a<sub>14</sub></b>                    |
| 261.8 <sup>+3</sup> | <b>y<sub>6</sub><sup>+3</sup></b>                | 461.2                      | <b>AuL</b>                                        | 666.3               | <b>GWVDVH-28</b>                                  | 954.5               | <b>AuLTIYSG-<br/>28</b>                           | 1576.8 | <b>uLTIYSGGWV<br/>DVH-28</b>             |
| 267.1               | <b>y<sub>2</sub>-NH<sub>3</sub></b>              | 463.2                      | <b>uLT-28</b>                                     | 672.3 <sup>+2</sup> | <b>y<sub>12</sub>-H<sub>2</sub>O<sup>+2</sup></b> | 959.5               | <b>IYSGGWVD<br/>V-H<sub>2</sub>O</b>              | 1577.7 | <b>b<sub>14</sub>-H<sub>2</sub>O</b>     |
| 273.1               | <b>GGW-28</b>                                    | 463.3                      | <b>LTIY-28</b>                                    | 672.8 <sup>+2</sup> | <b>y<sub>12</sub>-NH<sub>3</sub><sup>+2</sup></b> | 959.5               | <b>LTIYSGGWV<br/>-H<sub>2</sub>O</b>              | 1586.7 | <b>uLTIYSGGWV<br/>DVH-H<sub>2</sub>O</b> |
| 274.8 <sup>+3</sup> | <b>y<sub>7</sub>-H<sub>2</sub>O<sup>+3</sup></b> | 465.2                      | <b>TIYS</b>                                       | 673.3               | <b>SGGWVDV-28</b>                                 | 961.4               | <b>TIYSGGWV<br/>D-H<sub>2</sub>O</b>              | 1595.8 | <b>b<sub>14</sub></b>                    |
| 275.1 <sup>+3</sup> | <b>y<sub>7</sub>-NH<sub>3</sub><sup>+3</sup></b> | 469.2                      | <b>SGGWV-<br/>H<sub>2</sub>O</b>                  | 674.4               | <b>LTIYSGG-H<sub>2</sub>O</b>                     | 964.5               | <b>AuLTIYSG-<br/>H<sub>2</sub>O</b>               | 1604.8 | <b>uLTIYSGGWV<br/>DVH</b>                |

|                     |                                                  |                     |                                                   |                     |                                                   |            |                                      |        |                                           |
|---------------------|--------------------------------------------------|---------------------|---------------------------------------------------|---------------------|---------------------------------------------------|------------|--------------------------------------|--------|-------------------------------------------|
| 277.2               | <b>IY</b>                                        | 472.3               | <b>WVDV-28</b>                                    | 675.4               | <b>AuLTI</b>                                      | 964.5      | <b>b<sub>8</sub>-H<sub>2</sub>O</b>  | 1647.8 | <b>AuLTIYSGGW<br/>VDVH-28</b>             |
| 280.1               | <b>YSG-28</b>                                    | 473.2               | <b>uLT-H<sub>2</sub>O</b>                         | 676.3               | <b>GWVDVH-H<sub>2</sub>O</b>                      | 966.5      | <b>y<sub>9</sub>-H<sub>2</sub>O</b>  | 1657.8 | <b>AuLTIYSGGW<br/>VDVH-H<sub>2</sub>O</b> |
| 280.8 <sup>+3</sup> | <b>y<sub>7</sub><sup>+3</sup></b>                | 473.3               | <b>LTIY-H<sub>2</sub>O</b>                        | 681.3 <sup>+2</sup> | <b>y<sub>12</sub><sup>+2</sup></b>                | 967.5      | <b>y<sub>9</sub>-NH<sub>3</sub></b>  | 1675.8 | <b>AuLTIYSGGW<br/>VDVH</b>                |
| 284.2               | <b>y<sub>2</sub></b>                             | 478.2               | <b>IYSGG</b>                                      | 683.3               | <b>SGGWVDV-H<sub>2</sub>O</b>                     | 968.5      | <b>uLTIYSGG</b>                      | 1704.8 | <b>a<sub>15</sub></b>                     |
| 286.2               | <b>WV</b>                                        | 480.3               | <b>y<sub>4</sub>-H<sub>2</sub>O</b>               | 692.4               | <b>LTIYSGG</b>                                    | 973.5      | <b>YSGGWVDV<br/>H-28</b>             | 1714.8 | <b>b<sub>15</sub>-H<sub>2</sub>O</b>      |
| 286.2               | <b>VDV-28</b>                                    | 481.2               | <b>y<sub>4</sub>-NH<sub>3</sub></b>               | 694.3               | <b>GWVDVH</b>                                     | 977.5      | <b>IYSGGWVD<br/>V</b>                | 1732.8 | <b>b<sub>15</sub></b>                     |
| 290.1               | <b>YSG-<br/>H<sub>2</sub>O</b>                   | 482.2               | <b>WVDV-<br/>H<sub>2</sub>O</b>                   | 701.3               | <b>SGGWVDV</b>                                    | 977.5      | <b>LTIYSGGWV</b>                     | 1732.9 | <b>y<sub>14</sub>-H<sub>2</sub>O</b>      |
| 290.2 <sup>+2</sup> | <b>y<sub>5</sub>-H<sub>2</sub>O<sup>+2</sup></b> | 483.7 <sup>+2</sup> | <b>y<sub>9</sub>-H<sub>2</sub>O<sup>+2</sup></b>  | 704.4               | <b>a<sub>6</sub></b>                              | 979.5      | <b>TIYSGGW<br/>D</b>                 | 1733.8 | <b>y<sub>14</sub>-NH<sub>3</sub></b>      |
| 290. <sup>+2</sup>  | <b>y<sub>5</sub>-NH<sub>3</sub><sup>+2</sup></b> | 484.2 <sup>+2</sup> | <b>y<sub>9</sub>-NH<sub>3</sub><sup>+2</sup></b>  | 714.4               | <b>b<sub>6</sub>-H<sub>2</sub>O</b>               | 982.5      | <b>AuLTIYSG</b>                      | 1750.8 | <b>b<sub>15</sub>+H<sub>2</sub>O</b>      |
| 293.8 <sup>+3</sup> | <b>y<sub>8</sub>-H<sub>2</sub>O<sup>+3</sup></b> | 486.3 <sup>+3</sup> | <b>y<sub>13</sub>-H<sub>2</sub>O<sup>+3</sup></b> | 723.4               | <b>GGWVDVH-28</b>                                 | 982.5      | <b>b<sub>8</sub></b>                 | 1750.9 | <b>y<sub>14</sub></b>                     |
| 294. <sup>+3</sup>  | <b>y<sub>8</sub>-NH<sub>3</sub><sup>+3</sup></b> | 486.6 <sup>+3</sup> | <b>y<sub>13</sub>-NH<sub>3</sub><sup>+3</sup></b> | 728.9 <sup>+2</sup> | <b>y<sub>13</sub>-H<sub>2</sub>O<sup>+2</sup></b> | 983.4      | <b>YSGGWVDV<br/>H-H<sub>2</sub>O</b> | 1803.9 | <b>y<sub>15</sub>-H<sub>2</sub>O</b>      |
| 296.2               | <b>VDV-<br/>H<sub>2</sub>O</b>                   | 487.2               | <b>SGGWV</b>                                      | 729.4 <sup>+2</sup> | <b>y<sub>13</sub>-NH<sub>3</sub><sup>+2</sup></b> | 984.5      | <b>y<sub>9</sub></b>                 | 1804.9 | <b>y<sub>15</sub>-NH<sub>3</sub></b>      |
| 299. <sup>+2</sup>  | <b>y<sub>5</sub><sup>+2</sup></b>                | 487.2               | <b>GGWVD-<br/>28</b>                              | 732.4               | <b>b<sub>6</sub></b>                              | 1001.<br>4 | <b>YSGGWVDV<br/>H</b>                | 1821.9 | <b>y<sub>15</sub></b>                     |
| 299.8 <sup>+3</sup> | <b>y<sub>8</sub><sup>+3</sup></b>                | 490.3               | <b>a<sub>4</sub></b>                              | 733.3               | <b>GGWVDVH-H<sub>2</sub>O</b>                     | 1011.<br>5 | <b>a<sub>9</sub></b>                 | 1860.9 | <b>MH-H<sub>2</sub>O</b>                  |
| 300.2               | <b>LTI-28</b>                                    | 491.2               | <b>uLT</b>                                        | 735.4               | <b>IYSGGWV-28</b>                                 | 1011.<br>5 | <b>AuLTIYSGG<br/>-28</b>             | 1861.9 | <b>MH-NH<sub>3</sub></b>                  |
| 301.1               | <b>GGW</b>                                       | 491.3               | <b>LTIY</b>                                       | 737.3               | <b>YSGGWVD-28</b>                                 | 1021.<br>5 | <b>b<sub>9</sub>-H<sub>2</sub>O</b>  | 1878.9 | <b>MH</b>                                 |
| 308.1               | <b>YSG</b>                                       | 492.3 <sup>+3</sup> | <b>y<sub>13</sub><sup>+3</sup></b>                | 737.4               | <b>TIYSGGW-28</b>                                 | 1021.<br>5 | <b>AuLTIYSGG-H<sub>2</sub>O</b>      |        |                                           |
| 310.2               | <b>LTI-H<sub>2</sub>O</b>                        | 492. <sup>+2</sup>  | <b>y<sub>9</sub><sup>+2</sup></b>                 | 737.9 <sup>+2</sup> | <b>y<sub>13</sub><sup>+2</sup></b>                | 1039.<br>5 | <b>b<sub>9</sub></b>                 |        |                                           |

# NISLGAQGNINITAK

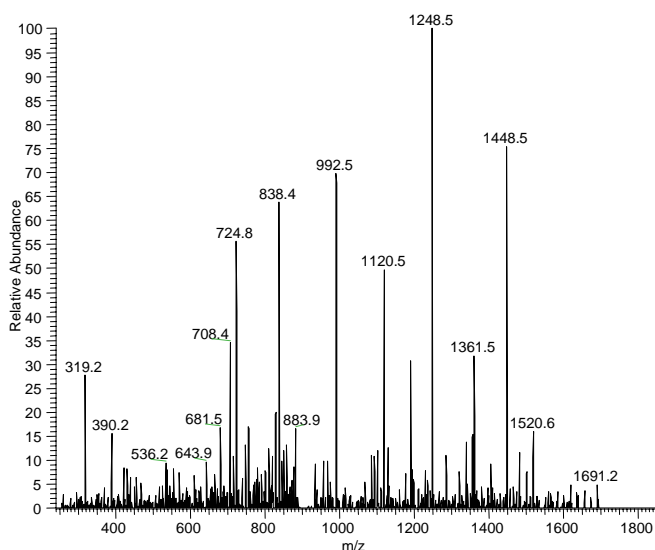

|                     |                                                              |                     |                                                  |                     |                                                   |       |                                     |        |                                      |
|---------------------|--------------------------------------------------------------|---------------------|--------------------------------------------------|---------------------|---------------------------------------------------|-------|-------------------------------------|--------|--------------------------------------|
| 60.0                | <b>S</b>                                                     | 314.1               | <b>GAQG</b>                                      | 553.3               | <b>ISLGAQ-NH<sub>3</sub></b>                      | 789.4 | <b>GAQGNlu-28</b>                   | 1102.6 | <b>a<sub>10</sub></b>                |
| 65.6 <sup>+2</sup>  | <b>y<sub>1</sub><sup>-</sup>-NH<sub>3</sub><sup>+2</sup></b> | 314.2               | <b>ISL</b>                                       | 560.8 <sup>+2</sup> | <b>y<sub>9</sub><sup>+2</sup></b>                 | 789.4 | <b>NIuITA</b>                       | 1102.6 | <b>ISLGAQGNlu-28</b>                 |
| 74.1                | <b>T</b>                                                     | 319.2               | <b>y<sub>3</sub></b>                             | 561.3               | <b>GNlu</b>                                       | 800.3 | <b>GAQGNlu-NH<sub>3</sub></b>       | 1102.6 | <b>y<sub>9</sub>-H<sub>2</sub>O</b>  |
| 74.1 <sup>+2</sup>  | <b>y<sub>1</sub><sup>+2</sup></b>                            | 329.2               | <b>SLGA</b>                                      | 562.3               | <b>uITA</b>                                       | 801.4 | <b>a<sub>7</sub>-NH<sub>3</sub></b> | 1103.6 | <b>y<sub>9</sub>-NH<sub>3</sub></b>  |
| 84.1                | <b>Q</b>                                                     | 342.2               | <b>LGAQ-28</b>                                   | 562.3               | <b>a<sub>4</sub></b>                              | 802.4 | <b>QGNluI</b>                       | 1112.6 | <b>SLGAQGNluI-H<sub>2</sub>O</b>     |
| 84.1                | <b>K</b>                                                     | 343.2               | <b>AQGN-28</b>                                   | 570.3               | <b>ISLGAQ</b>                                     | 803.5 | <b>y<sub>6</sub>-H<sub>2</sub>O</b> | 1112.6 | <b>b<sub>10</sub>-H<sub>2</sub>O</b> |
| 86.1                | <b>L</b>                                                     | 343.2               | <b>ISLG-28</b>                                   | 572.3               | <b>b<sub>4</sub>-H<sub>2</sub>O</b>               | 804.4 | <b>y<sub>6</sub>-NH<sub>3</sub></b> | 1112.6 | <b>ISLGAQGNlu-H<sub>2</sub>O</b>     |
| 86.1                | <b>I</b>                                                     | 345.7 <sup>+2</sup> | <b>y<sub>5</sub>-H<sub>2</sub>O<sup>+2</sup></b> | 576.3               | <b>IuIT-28</b>                                    | 817.4 | <b>GAQGNlu</b>                      | 1113.5 | <b>SLGAQGNluI-NH<sub>3</sub></b>     |
| 87.1                | <b>N</b>                                                     | 346.2 <sup>+2</sup> | <b>y<sub>5</sub>-NH<sub>3</sub><sup>+2</sup></b> | 586.3               | <b>IuIT-H<sub>2</sub>O</b>                        | 818.4 | <b>GNluITA-28</b>                   | 1113.5 | <b>ISLGAQGNlu-NH<sub>3</sub></b>     |
| 101.1 <sup>+2</sup> | <b>y<sub>2</sub><sup>-</sup>-NH<sub>3</sub><sup>+2</sup></b> | 353.2               | <b>LGAQ-NH<sub>3</sub></b>                       | 587.3 <sup>+2</sup> | <b>y<sub>10</sub>-H<sub>2</sub>O<sup>+2</sup></b> | 818.4 | <b>a<sub>7</sub></b>                | 1113.5 | <b>b<sub>10</sub>-NH<sub>3</sub></b> |
| 101.1               | <b>Q</b>                                                     | 353.2               | <b>ISLG-H<sub>2</sub>O</b>                       | 587.8 <sup>+2</sup> | <b>y<sub>10</sub>-NH<sub>3</sub><sup>+2</sup></b> | 821.5 | <b>y<sub>6</sub></b>                | 1116.6 | <b>LGAQGNluIT-28</b>                 |
| 101.1               | <b>GA-28</b>                                                 | 354.1               | <b>AQGN-NH<sub>3</sub></b>                       | 589.3               | <b>NIuI-28</b>                                    | 826.5 | <b>ISLGAQGNI-28</b>                 | 1120.6 | <b>y<sub>9</sub></b>                 |
| 101.1               | <b>K</b>                                                     | 354.7 <sup>+2</sup> | <b>y<sub>5</sub><sup>+2</sup></b>                | 590.3               | <b>b<sub>4</sub></b>                              | 828.4 | <b>GNluITA-H<sub>2</sub>O</b>       | 1126.6 | <b>LGAQGNluIT-H<sub>2</sub>O</b>     |
| 109.6 <sup>+2</sup> | <b>y<sub>2</sub><sup>+2</sup></b>                            | 362.2               | <b>IuI-28</b>                                    | 596.3 <sup>+2</sup> | <b>y<sub>10</sub><sup>+2</sup></b>                | 828.4 | <b>b<sub>7</sub>-H<sub>2</sub>O</b> | 1127.6 | <b>LGAQGNluIT-NH<sub>3</sub></b>     |
| 126.1               | <b>K</b>                                                     | 362.2               | <b>Iu-28</b>                                     | 599.4               | <b>ISLGAQG-28</b>                                 | 829.4 | <b>GNluITA-NH<sub>3</sub></b>       | 1130.6 | <b>SLGAQGNluI</b>                    |
| 129.1               | <b>Q</b>                                                     | 362.2               | <b>a<sub>2</sub></b>                             | 600.3               | <b>NIuI-NH<sub>3</sub></b>                        | 829.4 | <b>b<sub>7</sub>-NH<sub>3</sub></b> | 1130.6 | <b>ISLGAQGNlu</b>                    |

|                     |                                                  |                     |                                                  |                     |                                                   |                     |                                       |        |                                      |
|---------------------|--------------------------------------------------|---------------------|--------------------------------------------------|---------------------|---------------------------------------------------|---------------------|---------------------------------------|--------|--------------------------------------|
| 129.1               | <b>GA</b>                                        | 370.2               | <b>LGAQ</b>                                      | 600.3               | <b>SLGAQGN-28</b>                                 | 836.5               | <b>ISLGAQGNi-H<sub>2</sub>O</b>       | 1130.6 | <b>b<sub>10</sub></b>                |
| 129.1               | <b>K</b>                                         | 371.2               | <b>AQGN</b>                                      | 604.3               | <b>IuIT</b>                                       | 837.4               | <b>ISLGAQGNi-NH<sub>3</sub></b>       | 1144.6 | <b>LGAQGNiIuIT</b>                   |
| 130.1               | <b>y<sub>1</sub>-NH<sub>3</sub></b>              | 371.2               | <b>ISLG</b>                                      | 609.3               | <b>ISLGAQG-H<sub>2</sub>O</b>                     | 845.4               | <b>AQGNiIuI-28</b>                    | 1173.6 | <b>y<sub>10</sub>-H<sub>2</sub>O</b> |
| 143.1               | <b>LG-28</b>                                     | 385.2               | <b>QGNi-28</b>                                   | 610.3               | <b>SLGAQGN-H<sub>2</sub>O</b>                     | 846.4               | <b>GNIuITA</b>                        | 1174.6 | <b>y<sub>10</sub>-NH<sub>3</sub></b> |
| 144.1               | <b>GN-28</b>                                     | 390.2               | <b>IuI</b>                                       | 610.3               | <b>ISLGAQGN-NH<sub>3</sub></b>                    | 846.4               | <b>b<sub>7</sub></b>                  | 1187.6 | <b>LGAQGNiIuITA-28</b>               |
| 145.1               | <b>TA-28</b>                                     | 390.2               | <b>Iu</b>                                        | 611.3               | <b>SLGAQGN-NH<sub>3</sub></b>                     | 854.5               | <b>ISLGAQGNi</b>                      | 1191.6 | <b>y<sub>10</sub></b>                |
| 147.1               | <b>y<sub>1</sub></b>                             | 390.2               | <b>b<sub>2</sub></b>                             | 615.8 <sup>+2</sup> | <b>y<sub>11</sub>-H<sub>2</sub>O<sup>+2</sup></b> | 856.4               | <b>AQGNiIuI-NH<sub>3</sub></b>        | 1197.6 | <b>LGAQGNiIuITA-H<sub>2</sub>O</b>   |
| 151.1 <sup>+2</sup> | <b>y<sub>3</sub>-H<sub>2</sub>O<sup>+2</sup></b> | 396.2               | <b>QGNi-NH<sub>3</sub></b>                       | 616.3 <sup>+2</sup> | <b>y<sub>11</sub>-NH<sub>3</sub><sup>+2</sup></b> | 858.4               | <b>a<sub>8</sub>-NH<sub>3</sub></b>   | 1198.6 | <b>LGAQGNiIuITA-NH<sub>3</sub></b>   |
| 151.6 <sup>+2</sup> | <b>y<sub>3</sub>-NH<sub>3</sub><sup>+2</sup></b> | 399.2               | <b>LGAQGN-28</b>                                 | 617.3               | <b>NiIuI</b>                                      | 873.4               | <b>AQGNiIuI</b>                       | 1203.6 | <b>SLGAQGNiIuIT-28</b>               |
| 155.0               | <b>GN-NH<sub>3</sub></b>                         | 400.2               | <b>GAQGN-28</b>                                  | 619.3               | <b>a<sub>5</sub></b>                              | 875.4               | <b>QGNiIuIT-28</b>                    | 1213.6 | <b>SLGAQGNiIuIT-H<sub>2</sub>O</b>   |
| 155.1               | <b>TA-H<sub>2</sub>O</b>                         | 402.2 <sup>+2</sup> | <b>y<sub>6</sub>-H<sub>2</sub>O<sup>+2</sup></b> | 624.8 <sup>+2</sup> | <b>y<sub>11</sub><sup>+2</sup></b>                | 875.4               | <b>a<sub>8</sub></b>                  | 1214.6 | <b>SLGAQGNiIuIT-NH<sub>3</sub></b>   |
| 158.1               | <b>QG-28</b>                                     | 402.7 <sup>+2</sup> | <b>y<sub>6</sub>-NH<sub>3</sub><sup>+2</sup></b> | 626.4               | <b>LGAQGNi-28</b>                                 | 885.4               | <b>QGNiIuIT-H<sub>2</sub>O</b>        | 1215.6 | <b>LGAQGNiIuITA</b>                  |
| 160.1 <sup>+2</sup> | <b>y<sub>3</sub><sup>+2</sup></b>                | 410.2               | <b>LGAQGN-NH<sub>3</sub></b>                     | 627.3               | <b>ISLGAQGN</b>                                   | 885.4               | <b>b<sub>8</sub>-H<sub>2</sub>O</b>   | 1215.7 | <b>ISLGAQGNiIuI-28</b>               |
| 169.1               | <b>QG-NH<sub>3</sub></b>                         | 411.2               | <b>GAQGN-NH<sub>3</sub></b>                      | 628.3               | <b>SLGAQGN</b>                                    | 886.4               | <b>QGNiIuIT-NH<sub>3</sub></b>        | 1225.6 | <b>ISLGAQGNiIuI-H<sub>2</sub>O</b>   |
| 171.1               | <b>LG</b>                                        | 411.2 <sup>+2</sup> | <b>y<sub>6</sub><sup>+2</sup></b>                | 629.3               | <b>b<sub>5</sub>-H<sub>2</sub>O</b>               | 886.4               | <b>b<sub>8</sub>-NH<sub>3</sub></b>   | 1226.6 | <b>ISLGAQGNiIuI-NH<sub>3</sub></b>   |
| 172.1               | <b>GN</b>                                        | 413.2               | <b>QGNi</b>                                      | 637.3               | <b>LGAQGNi-NH<sub>3</sub></b>                     | 902.5               | <b>GAQGNiIuI-28</b>                   | 1230.6 | <b>y<sub>11</sub>-H<sub>2</sub>O</b> |
| 172.1               | <b>AQ-28</b>                                     | 414.3               | <b>y<sub>4</sub>-H<sub>2</sub>O</b>              | 646.3               | <b>GNIuI-28</b>                                   | 902.5               | <b>LGAQGNiIu-28</b>                   | 1231.6 | <b>SLGAQGNiIuIT</b>                  |
| 173.1               | <b>TA</b>                                        | 414.3               | <b>ISLGA-28</b>                                  | 647.3               | <b>b<sub>5</sub></b>                              | 903.4               | <b>QGNiIuIT</b>                       | 1231.6 | <b>y<sub>11</sub>-NH<sub>3</sub></b> |
| 173.1               | <b>SL-28</b>                                     | 415.3               | <b>y<sub>4</sub>-NH<sub>3</sub></b>              | 647.4               | <b>IuITA-28</b>                                   | 903.4               | <b>b<sub>8</sub></b>                  | 1243.7 | <b>ISLGAQGNiIuI</b>                  |
| 173.1               | <b>IS-28</b>                                     | 424.3               | <b>ISLGA-H<sub>2</sub>O</b>                      | 654.4               | <b>LGAQGNi</b>                                    | 910.5 <sup>+2</sup> | <b>MH-H<sub>2</sub>O<sup>+2</sup></b> | 1248.6 | <b>y<sub>11</sub></b>                |
| 183.1               | <b>AQ-NH<sub>3</sub></b>                         | 427.2               | <b>LGAQGN</b>                                    | 657.3               | <b>GNIuI-NH<sub>3</sub></b>                       | 911.0 <sup>+2</sup> | <b>MH-NH<sub>3</sub><sup>+2</sup></b> | 1274.7 | <b>SLGAQGNiIuITA-28</b>              |
| 183.1               | <b>SL-H<sub>2</sub>O</b>                         | 428.2               | <b>GAQGN</b>                                     | 657.3               | <b>IuITA-H<sub>2</sub>O</b>                       | 913.4               | <b>GAQGNiIuI-NH<sub>3</sub></b>       | 1284.6 | <b>SLGAQGNiIuITA-H<sub>2</sub>O</b>  |

|                     |                                                              |                     |                                                  |                     |                                                   |                     |                                     |        |                                      |
|---------------------|--------------------------------------------------------------|---------------------|--------------------------------------------------|---------------------|---------------------------------------------------|---------------------|-------------------------------------|--------|--------------------------------------|
| 183.1               | <b>IS-H<sub>2</sub>O</b>                                     | 429.2               | <b>SLGAQ-28</b>                                  | 661.3               | <b>QGNiU-28</b>                                   | 913.4               | <b>LGAQGNiU-NH<sub>3</sub></b>      | 1285.6 | <b>SLGAQGNiUITA-NH<sub>3</sub></b>   |
| 186.1               | <b>QG</b>                                                    | 432.3               | <b>y<sub>4</sub></b>                             | 672.3               | <b>QGNiU-NH<sub>3</sub></b>                       | 917.5               | <b>y<sub>7</sub>-H<sub>2</sub>O</b> | 1302.7 | <b>SLGAQGNiUITA</b>                  |
| 187.1               | <b>IT-28</b>                                                 | 439.2               | <b>SLGAQ-H<sub>2</sub>O</b>                      | 672.4 <sup>+2</sup> | <b>y<sub>12</sub>-H<sub>2</sub>O<sup>+2</sup></b> | 918.5               | <b>y<sub>7</sub>-NH<sub>3</sub></b> | 1316.7 | <b>ISLGAQGNiUIT-28</b>               |
| 197.1               | <b>IT-H<sub>2</sub>O</b>                                     | 440.2               | <b>SLGAQ-NH<sub>3</sub></b>                      | 672.9 <sup>+2</sup> | <b>y<sub>12</sub>-NH<sub>3</sub><sup>+2</sup></b> | 919.5 <sup>+2</sup> | <b>MH<sup>+2</sup></b>              | 1326.7 | <b>ISLGAQGNiUIT-H<sub>2</sub>O</b>   |
| 200.1               | <b>AQ</b>                                                    | 442.3               | <b>ISLGA</b>                                     | 674.3               | <b>GNiU</b>                                       | 930.5               | <b>GAQGNiU</b>                      | 1327.7 | <b>ISLGAQGNiUIT-NH<sub>3</sub></b>   |
| 200.1               | <b>NI-28</b>                                                 | 449.2               | <b>a<sub>3</sub></b>                             | 675.4               | <b>IuITA</b>                                      | 930.5               | <b>LGAQGNiU</b>                     | 1343.7 | <b>y<sub>12</sub>-H<sub>2</sub>O</b> |
| 201.1               | <b>y<sub>2</sub>-NH<sub>3</sub></b>                          | 456.3               | <b>AQGNi-28</b>                                  | 681.4 <sup>+2</sup> | <b>y<sub>12</sub><sup>+2</sup></b>                | 935.5               | <b>y<sub>7</sub></b>                | 1344.7 | <b>ISLGAQGNiUIT</b>                  |
| 201.1               | <b>SL</b>                                                    | 457.2               | <b>SLGAQ</b>                                     | 689.3               | <b>QGNiU</b>                                      | 946.5               | <b>AQGNiUIT-28</b>                  | 1344.7 | <b>y<sub>12</sub>-NH<sub>3</sub></b> |
| 201.1               | <b>IS</b>                                                    | 459.2               | <b>b<sub>3</sub>-H<sub>2</sub>O</b>              | 690.4               | <b>NiUIT-28</b>                                   | 946.5               | <b>QGNiUITA-28</b>                  | 1361.6 | <b>a<sub>11</sub>-NH<sub>3</sub></b> |
| 207.6 <sup>+2</sup> | <b>y<sub>4</sub><sup>-</sup>H<sub>2</sub>O<sup>+2</sup></b>  | 459.3 <sup>+2</sup> | <b>y<sub>7</sub>-H<sub>2</sub>O<sup>+2</sup></b> | 690.4               | <b>y<sub>5</sub>-H<sub>2</sub>O</b>               | 956.5               | <b>QGNiUITA-H<sub>2</sub>O</b>      | 1361.7 | <b>y<sub>12</sub></b>                |
| 208.1 <sup>+2</sup> | <b>y<sub>4</sub><sup>-</sup>-NH<sub>3</sub><sup>+2</sup></b> | 459.7 <sup>+2</sup> | <b>y<sub>7</sub>-NH<sub>3</sub><sup>+2</sup></b> | 690.4               | <b>a<sub>6</sub></b>                              | 956.5               | <b>AQGNiUIT-H<sub>2</sub>O</b>      | 1378.7 | <b>a<sub>11</sub></b>                |
| 211.1               | <b>NI-NH<sub>3</sub></b>                                     | 463.2               | <b>uIT-28</b>                                    | 691.4               | <b>y<sub>5</sub>-NH<sub>3</sub></b>               | 957.5               | <b>AQGNiUIT-NH<sub>3</sub></b>      | 1387.7 | <b>ISLGAQGNiUITA-28</b>              |
| 214.2               | <b>LGA-28</b>                                                | 467.2               | <b>AQGNi-NH<sub>3</sub></b>                      | 700.4               | <b>NiUIT-H<sub>2</sub>O</b>                       | 957.5               | <b>QGNiUITA-NH<sub>3</sub></b>      | 1388.7 | <b>b<sub>11</sub>-H<sub>2</sub>O</b> |
| 215.1               | <b>IT</b>                                                    | 468.4 <sup>+2</sup> | <b>y<sub>7</sub><sup>+2</sup></b>                | 700.4               | <b>b<sub>6</sub>-H<sub>2</sub>O</b>               | 972.5               | <b>a<sub>9</sub>-NH<sub>3</sub></b> | 1389.6 | <b>b<sub>11</sub>-NH<sub>3</sub></b> |
| 216.6 <sup>+2</sup> | <b>y<sub>4</sub><sup>+2</sup></b>                            | 473.2               | <b>uIT-H<sub>2</sub>O</b>                        | 701.3               | <b>NiUIT-NH<sub>3</sub></b>                       | 974.5               | <b>AQGNiUIT</b>                     | 1397.7 | <b>ISLGAQGNiUITA-H<sub>2</sub>O</b>  |
| 218.1               | <b>y<sub>2</sub></b>                                         | 475.3               | <b>IuI-28</b>                                    | 708.4               | <b>y<sub>5</sub></b>                              | 974.5               | <b>QGNiUITA</b>                     | 1398.7 | <b>ISLGAQGNiUITA-NH<sub>3</sub></b>  |
| 228.1               | <b>NI</b>                                                    | 476.2               | <b>NiU-28</b>                                    | 713.4               | <b>SLGAQGNi-28</b>                                | 974.5               | <b>y<sub>8</sub>-H<sub>2</sub>O</b> | 1406.7 | <b>b<sub>11</sub></b>                |
| 229.1               | <b>AQG-28</b>                                                | 477.2               | <b>b<sub>3</sub></b>                             | 713.4               | <b>ISLGAQGN-28</b>                                | 975.5               | <b>y<sub>8</sub>-NH<sub>3</sub></b> | 1415.7 | <b>ISLGAQGNiUITA</b>                 |
| 229.1               | <b>GAQ-28</b>                                                | 484.3               | <b>AQGNi</b>                                     | 715.9 <sup>+2</sup> | <b>y<sub>13</sub>-H<sub>2</sub>O<sup>+2</sup></b> | 989.5               | <b>SLGAQGNiU-28</b>                 | 1430.7 | <b>y<sub>13</sub>-H<sub>2</sub>O</b> |
| 230.1               | <b>SLG-28</b>                                                | 486.3               | <b>SLGAQG-28</b>                                 | 716.4 <sup>+2</sup> | <b>y<sub>13</sub>-NH<sub>3</sub><sup>+2</sup></b> | 989.5               | <b>a<sub>9</sub></b>                | 1431.7 | <b>y<sub>13</sub>-NH<sub>3</sub></b> |
| 240.1               | <b>GAQ-NH<sub>3</sub></b>                                    | 487.2               | <b>NiU-NH<sub>3</sub></b>                        | 718.4               | <b>NiUIT</b>                                      | 992.5               | <b>y<sub>8</sub></b>                | 1448.8 | <b>y<sub>13</sub></b>                |
| 240.1               | <b>AQG-NH<sub>3</sub></b>                                    | 487.8 <sup>+2</sup> | <b>y<sub>8</sub>-H<sub>2</sub>O<sup>+2</sup></b> | 718.4               | <b>b<sub>6</sub></b>                              | 999.5               | <b>SLGAQGNiU-H<sub>2</sub>O</b>     | 1474.7 | <b>a<sub>12</sub>-NH<sub>3</sub></b> |
| 240.1               | <b>SLG-H<sub>2</sub>O</b>                                    | 488.3 <sup>+2</sup> | <b>y<sub>8</sub>-NH<sub>3</sub><sup>+2</sup></b> | 723.4               | <b>SLGAQGNi-H<sub>2</sub>O</b>                    | 999.5               | <b>b<sub>9</sub>-H<sub>2</sub>O</b> | 1491.8 | <b>a<sub>12</sub></b>                |



|       |                                     |                     |                                                  |                     |                                                   |        |                                      |        |                                      |
|-------|-------------------------------------|---------------------|--------------------------------------------------|---------------------|---------------------------------------------------|--------|--------------------------------------|--------|--------------------------------------|
| 242.1 | <b>LGA</b>                          | 491.2               | uIT                                              | 723.4               | <b>ISLGAQGN-H<sub>2</sub>O</b>                    | 1000.5 | <b>SLGAQGNlu-NH<sub>3</sub></b>      | 1501.7 | <b>b<sub>12</sub>-H<sub>2</sub>O</b> |
| 257.1 | <b>GAQ</b>                          | 496.3               | <b>SLGAQG-H<sub>2</sub>O</b>                     | 724.4               | <b>SLGAQGNl-NH<sub>3</sub></b>                    | 1000.5 | <b>b<sub>9</sub>-NH<sub>3</sub></b>  | 1502.7 | <b>b<sub>12</sub>-NH<sub>3</sub></b> |
| 257.1 | <b>AQG</b>                          | 496.7 <sup>+2</sup> | <b>y<sub>8</sub><sup>+2</sup></b>                | 724.4               | <b>ISLGAQGN-NH<sub>3</sub></b>                    | 1003.5 | <b>GAQGNluIT-28</b>                  | 1519.7 | <b>b<sub>12</sub></b>                |
| 257.2 | <b>GNI-28</b>                       | 497.2               | <b>SLGAQG-NH<sub>3</sub></b>                     | 724.9 <sup>+2</sup> | <b>y<sub>13</sub><sup>+2</sup></b>                | 1013.5 | <b>GAQGNluIT-H<sub>2</sub>O</b>      | 1543.8 | <b>y<sub>14</sub>-H<sub>2</sub>O</b> |
| 258.1 | <b>SLG</b>                          | 503.3               | luI                                              | 732.4               | <b>AQGNlu-28</b>                                  | 1014.5 | <b>GAQGNluIT-NH<sub>3</sub></b>      | 1544.8 | <b>y<sub>14</sub>-NH<sub>3</sub></b> |
| 258.2 | <b>ITA-28</b>                       | 504.2               | Nlu                                              | 741.4               | <b>SLGAQGNl</b>                                   | 1015.5 | <b>LGAQGNluI-28</b>                  | 1561.8 | <b>y<sub>14</sub></b>                |
| 268.1 | <b>GNI-NH<sub>3</sub></b>           | 513.3               | <b>GAQGNl-28</b>                                 | 741.4               | <b>ISLGAQGN</b>                                   | 1017.5 | <b>SLGAQGNlu</b>                     | 1575.8 | <b>a<sub>13</sub>-NH<sub>3</sub></b> |
| 268.2 | <b>ITA-H<sub>2</sub>O</b>           | 513.3               | <b>LGAQGN-28</b>                                 | 743.3               | <b>AQGNlu-NH<sub>3</sub></b>                      | 1017.5 | <b>b<sub>9</sub></b>                 | 1592.8 | <b>a<sub>13</sub></b>                |
| 272.1 | <b>QGN-28</b>                       | 514.3               | <b>SLGAQG</b>                                    | 747.4               | <b>GNIluIT-28</b>                                 | 1017.5 | <b>AQGNluITA-28</b>                  | 1602.8 | <b>b<sub>13</sub>-H<sub>2</sub>O</b> |
| 283.1 | <b>QGN-NH<sub>3</sub></b>           | 524.2               | <b>GAQGNl-NH<sub>3</sub></b>                     | 757.4               | <b>GNIluIT-H<sub>2</sub>O</b>                     | 1026.5 | <b>LGAQGNluI-NH<sub>3</sub></b>      | 1603.8 | <b>b<sub>13</sub>-NH<sub>3</sub></b> |
| 285.2 | <b>GNI</b>                          | 524.2               | <b>LGAQGN-NH<sub>3</sub></b>                     | 758.4               | <b>GNIluIT-NH<sub>3</sub></b>                     | 1027.5 | <b>AQGNluITA-H<sub>2</sub>O</b>      | 1620.8 | <b>b<sub>13</sub></b>                |
| 286.2 | <b>GAQG-28</b>                      | 533.3               | <b>GNIlu-28</b>                                  | 760.3               | <b>AQGNlu</b>                                     | 1028.5 | <b>AQGNluITA-NH<sub>3</sub></b>      | 1646.8 | <b>a<sub>14</sub>-NH<sub>3</sub></b> |
| 286.2 | <b>ITA</b>                          | 534.3               | uITA-28                                          | 761.4               | <b>NluITA-28</b>                                  | 1031.5 | <b>GAQGNluIT</b>                     | 1663.8 | <b>a<sub>14</sub></b>                |
| 286.2 | <b>ISL-28</b>                       | 541.3               | <b>GAQGNl</b>                                    | 771.4               | <b>NluITA-H<sub>2</sub>O</b>                      | 1043.5 | <b>LGAQGNluI</b>                     | 1673.8 | <b>b<sub>14</sub>-H<sub>2</sub>O</b> |
| 296.2 | <b>ISL-H<sub>2</sub>O</b>           | 541.3               | <b>LGAQGN</b>                                    | 772.4               | <b>NluITA-NH<sub>3</sub></b>                      | 1045.5 | <b>AQGNluITA</b>                     | 1674.8 | <b>b<sub>14</sub>-NH<sub>3</sub></b> |
| 297.1 | <b>GAQG-NH<sub>3</sub></b>          | 542.3               | <b>ISLGAQ-28</b>                                 | 772.4 <sup>+2</sup> | <b>y<sub>14</sub>-H<sub>2</sub>O<sup>+2</sup></b> | 1074.5 | <b>GAQGNluITA-28</b>                 | 1691.8 | <b>b<sub>14</sub></b>                |
| 300.1 | <b>QGN</b>                          | 544.2               | <b>GNIlu-NH<sub>3</sub></b>                      | 772.9 <sup>+2</sup> | <b>y<sub>14</sub>-NH<sub>3</sub><sup>+2</sup></b> | 1084.5 | <b>GAQGNluITA-H<sub>2</sub>O</b>     | 1819.9 | <b>MH-H<sub>2</sub>O</b>             |
| 301.2 | <b>y<sub>3</sub>-H<sub>2</sub>O</b> | 544.3               | uITA-H <sub>2</sub> O                            | 774.4               | <b>QGNluI-28</b>                                  | 1085.5 | <b>GAQGNluITA-NH<sub>3</sub></b>     | 1820.9 | <b>MH-NH<sub>3</sub></b>             |
| 301.2 | <b>SLGA-28</b>                      | 551.8 <sup>+2</sup> | <b>y<sub>9</sub>-H<sub>2</sub>O<sup>+2</sup></b> | 775.4               | <b>GNIluIT</b>                                    | 1085.5 | <b>a<sub>10</sub>-NH<sub>3</sub></b> | 1837.9 | <b>MH</b>                            |
| 302.2 | <b>y<sub>3</sub>-NH<sub>3</sub></b> | 552.3 <sup>+2</sup> | <b>y<sub>9</sub>-NH<sub>3</sub><sup>+2</sup></b> | 781.4 <sup>+2</sup> | <b>y<sub>14</sub><sup>+2</sup></b>                | 1102.5 | <b>GAQGNluITA</b>                    |        |                                      |
| 311.2 | <b>SLGA-H<sub>2</sub>O</b>          | 552.3               | <b>ISLGAQ-H<sub>2</sub>O</b>                     | 785.4               | <b>QGNluI-NH<sub>3</sub></b>                      | 1102.6 | <b>SLGAQGNluI-28</b>                 |        |                                      |

# FNNVSLN<sub>2</sub>GTGSG<sub>2</sub>LQFTTK

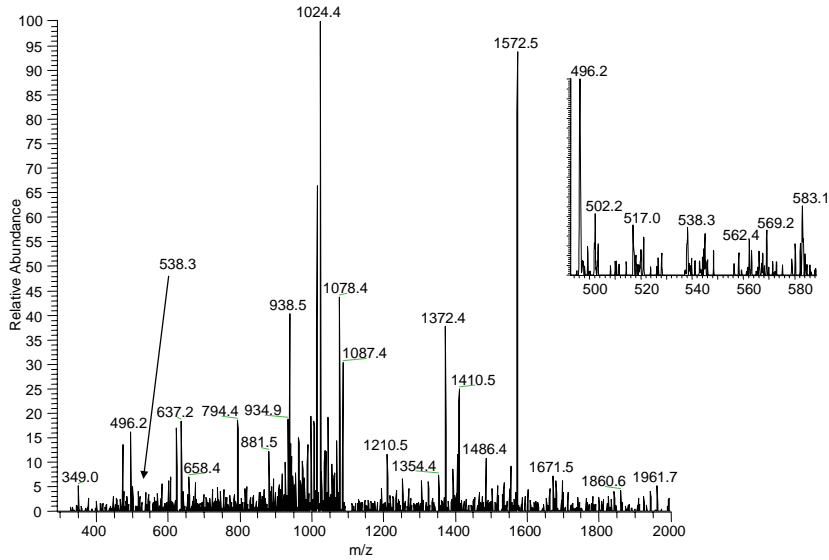

|                     |                                                  |                         |                                                  |           |                                     |       |                                              |        |                                                  |
|---------------------|--------------------------------------------------|-------------------------|--------------------------------------------------|-----------|-------------------------------------|-------|----------------------------------------------|--------|--------------------------------------------------|
| 60.0                | <b>S</b>                                         | 377.2                   | <b>QFT</b>                                       | 617.<br>3 | <b>SGLQFT-NH<sub>3</sub></b>        | 920.5 | <b>y<sub>9</sub>-H<sub>2</sub>O</b>          | 1307.6 | <b>SLuGTGSG<sub>2</sub>LQFT-T-H<sub>2</sub>O</b> |
| 65.6 <sup>+2</sup>  | <b>y<sub>1</sub>-NH<sub>3</sub><sup>+2</sup></b> | 386.2                   | <b>SGLQ</b>                                      | 618.<br>2 | <b>uGTGSG-H<sub>2</sub>O</b>        | 921.5 | <b>SLuGTGSGL-28</b>                          | 1308.5 | <b>NuVSLuGTGSG-NH<sub>3</sub></b>                |
| 72.1                | <b>V</b>                                         | 388.2                   | <b>TGSG<sub>2</sub>L-28</b>                      | 620.<br>3 | <b>b<sub>4</sub>-NH<sub>3</sub></b> | 921.5 | <b>y<sub>9</sub>-NH<sub>3</sub></b>          | 1308.6 | <b>SLuGTGSG<sub>2</sub>LQFT-T-NH<sub>3</sub></b> |
| 74.1                | <b>T</b>                                         | 388.7 <sup>+</sup><br>2 | <b>y<sub>7</sub>-H<sub>2</sub>O<sup>+2</sup></b> | 620.<br>3 | <b>GLQFTT-28</b>                    | 922.5 | <b>GTGSG<sub>2</sub>LQFTT-28</b>             | 1310.6 | <b>b<sub>10</sub>-H<sub>2</sub>O</b>             |
| 74.1 <sup>+2</sup>  | <b>y<sub>1</sub><sup>+2</sup></b>                | 389.2 <sup>+</sup><br>2 | <b>y<sub>7</sub>-NH<sub>3</sub><sup>+2</sup></b> | 624.<br>3 | <b>y<sub>5</sub></b>                | 931.4 | <b>SLuGTGSGL-H<sub>2</sub>O</b>              | 1311.6 | <b>b<sub>10</sub>-NH<sub>3</sub></b>             |
| 84.1                | <b>Q</b>                                         | 389.2                   | <b>LQF</b>                                       | 630.<br>3 | <b>GLQFTT-H<sub>2</sub>O</b>        | 932.4 | <b>GTGSG<sub>2</sub>LQFTT-H<sub>2</sub>O</b> | 1311.6 | <b>LuGTGSG<sub>2</sub>LQFT-T-28</b>              |
| 84.1                | <b>K</b>                                         | 390.2                   | <b>Lu</b>                                        | 631.<br>3 | <b>GLQFTT-NH<sub>3</sub></b>        | 933.4 | <b>GTGSG<sub>2</sub>LQFTT-NH<sub>3</sub></b> | 1321.6 | <b>LuGTGSG<sub>2</sub>LQFT-T-H<sub>2</sub>O</b>  |
| 86.1                | <b>L</b>                                         | 391.1                   | <b>Nu</b>                                        | 633.<br>3 | <b>VSLuG</b>                        | 935.4 | <b>VSLuGTGS<sub>2</sub></b>                  | 1322.6 | <b>LuGTGSG<sub>2</sub>LQFT-T-NH<sub>3</sub></b>  |
| 87.1                | <b>N</b>                                         | 397.7 <sup>+</sup><br>2 | <b>y<sub>7</sub><sup>+2</sup></b>                | 634.<br>3 | <b>SGLQFT</b>                       | 938.4 | <b>NuVSLu-28</b>                             | 1323.6 | <b>VSLuGTGSG<sub>2</sub>LQFT</b>                 |
| 101.1               | <b>Q</b>                                         | 398.2                   | <b>TGSG<sub>2</sub>L-H<sub>2</sub>O</b>          | 635.<br>3 | <b>SLuGT</b>                        | 938.5 | <b>y<sub>9</sub></b>                         | 1324.6 | <b>uVSLuGTGSG<sub>2</sub>L</b>                   |
| 101.1               | <b>K</b>                                         | 407.2                   | <b>uGT-28</b>                                    | 636.<br>2 | <b>uGTGSG</b>                       | 948.4 | <b>NuVSLu-H<sub>2</sub>O</b>                 | 1325.6 | <b>NuVSLuGTGSG</b>                               |
| 115.6 <sup>+2</sup> | <b>y<sub>2</sub>-H<sub>2</sub>O<sup>+2</sup></b> | 415.2                   | <b>GSG<sub>2</sub>LQ-28</b>                      | 637.<br>3 | <b>b<sub>4</sub></b>                | 949.4 | <b>NuVSLu-NH<sub>3</sub></b>                 | 1325.6 | <b>SLuGTGSG<sub>2</sub>LQFT-T</b>                |
| 116.1 <sup>+2</sup> | <b>y<sub>2</sub>-NH<sub>3</sub><sup>+2</sup></b> | 416.2                   | <b>TGSG<sub>2</sub>L</b>                         | 648.<br>3 | <b>GLQFTT</b>                       | 949.4 | <b>SLuGTGS<sub>2</sub>L</b>                  | 1328.6 | <b>b<sub>10</sub></b>                            |
| 117.1               | <b>SG-28</b>                                     | 417.2                   | <b>uGT-H<sub>2</sub>O</b>                        | 662.<br>3 | <b>NuVSL-28</b>                     | 950.5 | <b>GTGSG<sub>2</sub>LQFTT</b>                | 1339.6 | <b>LuGTGSG<sub>2</sub>LQFT-T</b>                 |

|                     |                               |                                 |                               |                     |                                  |                      |                                   |        |                                      |
|---------------------|-------------------------------|---------------------------------|-------------------------------|---------------------|----------------------------------|----------------------|-----------------------------------|--------|--------------------------------------|
| 117.1               | <b>GS-28</b>                  | 418.2                           | <b>GLQF-28</b>                | 663.3               | <b>TGSG LQF-28</b>               | 962.5                | <b>LuGTG SGLQ-28</b>              | 1354.6 | $y_{12}\text{-H}_2\text{O}$          |
| 120.1               | <b>F</b>                      | 419.2                           | <b>LuG-28</b>                 | 663.3               | <b>GSG LQFT-28</b>               | 965.5 <sup>+2</sup>  | $y_{16}^-\text{H}_2\text{O}^{+2}$ | 1355.6 | $y_{12}\text{-NH}_3$                 |
| 124.6 <sup>+2</sup> | $y_2^{+2}$                    | 425.2                           | <b>GSG LQ-H<sub>2</sub>O</b>  | 664.3               | <b>SLuGTG-28</b>                 | 966.0 <sup>+2</sup>  | $y_{16}^-\text{NH}_3^{+2}$        | 1370.6 | $a_{11}\text{-NH}_3$                 |
| 126.1               | <b>K</b>                      | 426.2                           | <b>GSG LQ-NH<sub>3</sub></b>  | 664.3               | <b>LuGTGS-28</b>                 | 966.4                | <b>NuVSLu</b>                     | 1372.7 | $y_{12}$                             |
| 127.1               | <b>SG-H<sub>2</sub>O</b>      | 429.2                           | <b>GLQF-NH<sub>3</sub></b>    | 672.3               | <b>NuVSL-H<sub>2</sub>O</b>      | 972.5                | <b>LuGTG SGLQ-H<sub>2</sub>O</b>  | 1387.6 | $a_{11}$                             |
| 127.1               | <b>GS-H<sub>2</sub>O</b>      | 432.2 <sup>+</sup> <sub>2</sub> | $y_8\text{-H}_2\text{O}^{+2}$ | 673.3               | <b>NuVSL-NH<sub>3</sub></b>      | 973.4                | <b>LuGTG SGLQ-NH<sub>3</sub></b>  | 1396.7 | <b>VSLuGTGSGLQ FT-28</b>             |
| 129.1               | <b>Q</b>                      | 432.7 <sup>+</sup> <sub>2</sub> | $y_8\text{-NH}_3^{+2}$        | 673.3               | <b>TGSG LQF-H<sub>2</sub>O</b>   | 974.5 <sup>+2</sup>  | $y_{16}^{+2}$                     | 1397.6 | $b_{11}\text{-H}_2\text{O}$          |
| 129.1               | <b>K</b>                      | 435.2                           | <b>uGT</b>                    | 673.3               | <b>GSG LQFT-H<sub>2</sub>O</b>   | 982.5                | <b>uVSLuG T-28</b>                | 1398.6 | $b_{11}\text{-NH}_3$                 |
| 130.1               | $y_1\text{-NH}_3$             | 435.2                           | <b>uVS-28</b>                 | 674.3               | <b>SLuGTG-H<sub>2</sub>O</b>     | 990.5                | <b>LuGTG SGLQ</b>                 | 1398.7 | <b>SLuGTGSGLQF TT-28</b>             |
| 131.1               | <b>TG-28</b>                  | 441.2 <sup>+</sup> <sub>2</sub> | $y_8^{+2}$                    | 674.3               | <b>LuGTGS-H<sub>2</sub>O</b>     | 992.4                | <b>uVSLuG T-H<sub>2</sub>O</b>    | 1406.7 | <b>VSLuGTGSGLQ FT-H<sub>2</sub>O</b> |
| 131.1               | <b>GT-28</b>                  | 443.2                           | <b>GSG LQ</b>                 | 674.3               | <b>GSG LQFT-NH<sub>3</sub></b>   | 995.5                | <b>NuVSLu G-28</b>                | 1407.7 | <b>VSLuGTGSGLQ FT-NH<sub>3</sub></b> |
| 141.1               | <b>GT-H<sub>2</sub>O</b>      | 445.2                           | <b>uVS-H<sub>2</sub>O</b>     | 674.3               | <b>TGSG LQF-NH<sub>3</sub></b>   | 996.5                | <b>uGTGS GLQF-28</b>              | 1408.7 | <b>SLuGTGSGLQF TT-H<sub>2</sub>O</b> |
| 141.1               | <b>TG-H<sub>2</sub>O</b>      | 445.2                           | <b>GTGSG L-28</b>             | 677.8 <sup>+2</sup> | $y_{12}\text{-H}_2\text{O}^{+2}$ | 1005.4               | <b>NuVSLu G-H<sub>2</sub>O</b>    | 1409.6 | <b>SLuGTGSGLQF TT-NH<sub>3</sub></b> |
| 143.1               | <b>GL-28</b>                  | 446.2                           | <b>GLQF</b>                   | 678.3 <sup>+2</sup> | $y_{12}\text{-NH}_3^{+2}$        | 1006.4               | <b>NuVSLu G-NH<sub>3</sub></b>    | 1410.7 | <b>NuVSLuGTGSG L-28</b>              |
| 145.1               | <b>SG</b>                     | 447.2                           | <b>LuG</b>                    | 679.3               | $a_5\text{-NH}_3$                | 1006.4               | <b>uGTGS GLQF-H<sub>2</sub>O</b>  | 1415.6 | $b_{11}$                             |
| 145.1               | <b>GS</b>                     | 449.2                           | <b>SLu-28</b>                 | 686.8 <sup>+2</sup> | $y_{12}^{+2}$                    | 1007.4               | <b>uGTGS GLQF-NH<sub>3</sub></b>  | 1420.6 | <b>NuVSLuGTGSG L-H<sub>2</sub>O</b>  |
| 147.1               | $y_1$                         | 450.2                           | <b>QFTT-28</b>                | 690.3               | <b>NuVSL</b>                     | 1010.5               | <b>uVSLuG T</b>                   | 1421.6 | <b>NuVSLuGTGSG L-NH<sub>3</sub></b>  |
| 159.1               | <b>TG</b>                     | 455.2                           | <b>GTGSG L-H<sub>2</sub>O</b> | 691.3               | <b>TGSG LQF</b>                  | 1020.5               | <b>VSLuGT GSGL-28</b>             | 1424.7 | <b>uVSLuGTGSGL Q-28</b>              |
| 159.1               | <b>GT</b>                     | 459.2                           | <b>SLu-H<sub>2</sub>O</b>     | 691.3               | <b>GSG LQFT</b>                  | 1021.5               | $y_{10}\text{-H}_2\text{O}$       | 1424.7 | <b>VSLuGTGSGLQ FT</b>                |
| 159.1               | <b>VS-28</b>                  | 460.2                           | <b>QFTT-H<sub>2</sub>O</b>    | 692.3               | <b>SLuGTG</b>                    | 1022.5 <sup>+2</sup> | $y_{17}^-\text{H}_2\text{O}^{+2}$ | 1426.7 | <b>SLuGTGSGLQF TT</b>                |
| 166.1 <sup>+2</sup> | $y_3\text{-H}_2\text{O}^{+2}$ | 460.8 <sup>+</sup> <sub>2</sub> | $y_9\text{-H}_2\text{O}^{+2}$ | 692.3               | <b>LuGTGS</b>                    | 1022.5               | $y_{10}\text{-NH}_3$              | 1427.6 | $a_{12}\text{-NH}_3$                 |
| 166.6 <sup>+2</sup> | $y_3\text{-NH}_3^{+2}$        | 461.2                           | <b>QFTT-NH<sub>3</sub></b>    | 696.3               | $a_5$                            | 1023.2               | $y_{17}^-\text{NH}_3^{+2}$        | 1434.7 | <b>uVSLuGTGSGL Q-H<sub>2</sub>O</b>  |
| 169.1               | <b>VS-H<sub>2</sub>O</b>      | 461.2 <sup>+</sup> <sub>2</sub> | $y_9\text{-NH}_3^{+2}$        | 706.3               | $b_5\text{-H}_2\text{O}$         | 1023.4               | <b>NuVSLu G</b>                   | 1435.6 | <b>uVSLuGTGSGL Q-NH<sub>3</sub></b>  |
| 171.1               | <b>GL</b>                     | 462.2                           | <b>NuV-28</b>                 | 706.4               | <b>VSLuGT-28</b>                 | 1024.5               | <b>uGTGS GLQF</b>                 | 1438.7 | <b>NuVSLuGTGSG L</b>                 |

|                     |                                     |                     |                                                   |                     |                                                   |                      |                                       |        |                                       |
|---------------------|-------------------------------------|---------------------|---------------------------------------------------|---------------------|---------------------------------------------------|----------------------|---------------------------------------|--------|---------------------------------------|
| 173.1               | <b>SL-28</b>                        | 462.3               | <b>LQFT-28</b>                                    | 707.3               | <b>b<sub>5</sub>-NH<sub>3</sub></b>               | 1030.5               | <b>VSLuGT GSGL-H<sub>2</sub>O</b>     | 1444.6 | <b>a<sub>12</sub></b>                 |
| 174.1               | <b>GSG-28</b>                       | 463.2               | <b>uVS</b>                                        | 707.4               | <b>SGLQFTT-28</b>                                 | 1031.5 <sup>+2</sup> | <b>y<sub>17</sub><sup>+2</sup></b>    | 1452.7 | <b>uVSLuGTGSGL Q</b>                  |
| 175.1               | <b>TT-28</b>                        | 464.2               | <b>uGTG-28</b>                                    | 716.3               | <b>VSLuGT-H<sub>2</sub>O</b>                      | 1039.5               | <b>uVSLuG TG-28</b>                   | 1454.6 | <b>b<sub>12</sub>-H<sub>2</sub>O</b>  |
| 175.1 <sup>+2</sup> | <b>y<sub>3</sub><sup>+2</sup></b>   | 469.8 <sup>+2</sup> | <b>y<sub>9</sub><sup>+2</sup></b>                 | 717.4               | <b>SGLQFTT-H<sub>2</sub>O</b>                     | 1039.5               | <b>y<sub>10</sub></b>                 | 1455.6 | <b>b<sub>12</sub>-NH<sub>3</sub></b>  |
| 183.1               | <b>SL-H<sub>2</sub>O</b>            | 472.3               | <b>LQFT-H<sub>2</sub>O</b>                        | 718.3               | <b>SGLQFTT-NH<sub>3</sub></b>                     | 1048.5               | <b>VSLuGT GSGL</b>                    | 1467.7 | <b>y<sub>13</sub>-H<sub>2</sub>O</b>  |
| 184.1               | <b>GSG-H<sub>2</sub>O</b>           | 473.2               | <b>NuV-NH<sub>3</sub></b>                         | 719.4               | <b>y<sub>6</sub>-H<sub>2</sub>O</b>               | 1049.5               | <b>uVSLuG TG-H<sub>2</sub>O</b>       | 1468.7 | <b>y<sub>13</sub>-NH<sub>3</sub></b>  |
| 185.1               | <b>TT-H<sub>2</sub>O</b>            | 473.2               | <b>GTGSG L</b>                                    | 720.4               | <b>GTGSG L F-28</b>                               | 1049.5               | <b>SLuGT GSGLQ-28</b>                 | 1472.6 | <b>b<sub>12</sub></b>                 |
| 187.1               | <b>VS</b>                           | 473.2               | <b>LQFT-NH<sub>3</sub></b>                        | 720.4               | <b>y<sub>6</sub>-NH<sub>3</sub></b>               | 1059.5               | <b>SLuGT GSGLQ-H<sub>2</sub>O</b>     | 1485.7 | <b>y<sub>13</sub></b>                 |
| 188.1               | <b>GTG-28</b>                       | 474.2               | <b>uGTG-H<sub>2</sub>O</b>                        | 721.3               | <b>uGTGSGL-28</b>                                 | 1060.5               | <b>SLuGT GSGLQ-NH<sub>3</sub></b>     | 1497.7 | <b>VSLuGTGSGLQ FTT-28</b>             |
| 198.1               | <b>GTG-H<sub>2</sub>O</b>           | 477.2               | <b>SLu</b>                                        | 721.3               | <b>LuGTGSGL-28</b>                                | 1067.5               | <b>uVSLuG TG</b>                      | 1507.7 | <b>VSLuGTGSGLQ FTT-H<sub>2</sub>O</b> |
| 201.1               | <b>SL</b>                           | 478.2               | <b>QFTT</b>                                       | 724.3               | <b>b<sub>5</sub></b>                              | 1068.5               | <b>a<sub>7</sub>-NH<sub>3</sub></b>   | 1508.7 | <b>VSLuGTGSGLQ FTT-NH<sub>3</sub></b> |
| 202.1               | <b>GSG</b>                          | 478.3               | <b>y<sub>4</sub>-H<sub>2</sub>O</b>               | 730.4               | <b>GTGSG L F-H<sub>2</sub>O</b>                   | 1077.5               | <b>SLuGT GSGLQ</b>                    | 1525.7 | <b>VSLuGTGSGLQ FTT</b>                |
| 203.1               | <b>TT</b>                           | 479.3               | <b>y<sub>4</sub>-NH<sub>3</sub></b>               | 731.3               | <b>uGTGSGL-H<sub>2</sub>O</b>                     | 1078.6               | <b>y<sub>11</sub>-H<sub>2</sub>O</b>  | 1538.7 | <b>NuVSLuGTGSGLQ-28</b>               |
| 214.2               | <b>LQ-28</b>                        | 490.2               | <b>NuV</b>                                        | 731.3               | <b>LuGTGSGL-H<sub>2</sub>O</b>                    | 1079.5               | <b>y<sub>11</sub>-NH<sub>3</sub></b>  | 1540.7 | <b>a<sub>13</sub>-NH<sub>3</sub></b>  |
| 216.1               | <b>GTG</b>                          | 490.3               | <b>LQFT</b>                                       | 731.3               | <b>GTGSG L F-NH<sub>3</sub></b>                   | 1085.5               | <b>a<sub>7</sub></b>                  | 1548.7 | <b>NuVSLuGTGSGLQ-H<sub>2</sub>O</b>   |
| 217.1               | <b>a<sub>2</sub>-NH<sub>3</sub></b> | 492.2               | <b>uGTG</b>                                       | 734.4               | <b>VSLuGT</b>                                     | 1095.5               | <b>b<sub>7</sub>-H<sub>2</sub>O</b>   | 1549.7 | <b>NuVSLuGTGSGLQ-NH<sub>3</sub></b>   |
| 218.1               | <b>TGS-28</b>                       | 493.2               | <b>a<sub>3</sub>-NH<sub>3</sub></b>               | 734.4 <sup>+2</sup> | <b>y<sub>13</sub>-H<sub>2</sub>O<sup>+2</sup></b> | 1096.0 <sup>+2</sup> | <b>MH-H<sub>2</sub>O<sup>+2</sup></b> | 1554.8 | <b>y<sub>14</sub>-H<sub>2</sub>O</b>  |
| 221.1               | <b>FT-28</b>                        | 496.3               | <b>y<sub>4</sub></b>                              | 734.9 <sup>+2</sup> | <b>y<sub>13</sub>-NH<sub>3</sub><sup>+2</sup></b> | 1096.5               | <b>b<sub>7</sub>-NH<sub>3</sub></b>   | 1555.7 | <b>y<sub>14</sub>-NH<sub>3</sub></b>  |
| 225.1               | <b>LQ-NH<sub>3</sub></b>            | 505.3               | <b>SGLQF-28</b>                                   | 735.4               | <b>SGLQFTT</b>                                    | 1096.5               | <b>NuVSLuGT-28</b>                    | 1557.7 | <b>a<sub>13</sub></b>                 |
| 228.1               | <b>TGS-H<sub>2</sub>O</b>           | 506.2               | <b>SLuG-28</b>                                    | 737.4               | <b>y<sub>6</sub></b>                              | 1096.5 <sup>+2</sup> | <b>MH-NH<sub>3</sub><sup>+2</sup></b> | 1566.7 | <b>NuVSLuGTGSGLQ</b>                  |
| 230.1               | <b>SGL-28</b>                       | 510.2               | <b>a<sub>3</sub></b>                              | 743.4 <sup>+2</sup> | <b>y<sub>13</sub><sup>+2</sup></b>                | 1096.6               | <b>y<sub>11</sub></b>                 | 1567.7 | <b>b<sub>13</sub>-H<sub>2</sub>O</b>  |
| 230.1               | <b>y<sub>2</sub>-H<sub>2</sub>O</b> | 511.3 <sup>+2</sup> | <b>y<sub>10</sub>-H<sub>2</sub>O<sup>+2</sup></b> | 748.4               | <b>GTGSG L F</b>                                  | 1097.5               | <b>uGTGSGLQFT-28</b>                  | 1568.7 | <b>b<sub>13</sub>-NH<sub>3</sub></b>  |
| 231.1               | <b>FT-H<sub>2</sub>O</b>            | 511.8 <sup>+2</sup> | <b>y<sub>10</sub>-NH<sub>3</sub><sup>+2</sup></b> | 749.3               | <b>uGTGSGL</b>                                    | 1105.0 <sup>+2</sup> | <b>MH<sup>+2</sup></b>                | 1571.7 | <b>uVSLuGTGSGL QF-28</b>              |
| 231.1               | <b>y<sub>2</sub>-NH<sub>3</sub></b> | 515.3               | <b>SGLQF-H<sub>2</sub>O</b>                       | 749.3               | <b>LuGTGSGL</b>                                   | 1106.5               | <b>NuVSLuGT-H<sub>2</sub>O</b>        | 1572.8 | <b>y<sub>14</sub></b>                 |

|                     |                                                  |                                 |                                                               |                     |                                                   |        |                                     |        |                                       |
|---------------------|--------------------------------------------------|---------------------------------|---------------------------------------------------------------|---------------------|---------------------------------------------------|--------|-------------------------------------|--------|---------------------------------------|
| 234.1               | <b>a<sub>2</sub></b>                             | 516.2                           | <b>SLuG-H<sub>2</sub>O</b>                                    | 751.3               | <b>SLuGTGS-28</b>                                 | 1107.5 | <b>NuVSLuGT-NH<sub>3</sub></b>      | 1581.7 | <b>uVSLuGTGSGLQF-H<sub>2</sub>O</b>   |
| 239.6 <sup>+2</sup> | <b>y<sub>4</sub>-H<sub>2</sub>O<sup>+2</sup></b> | 516.2                           | <b>SGLQF-NH<sub>3</sub></b>                                   | 761.3               | <b>SLuGTGS-H<sub>2</sub>O</b>                     | 1107.5 | <b>uGTGSGLQFT-H<sub>2</sub>O</b>    | 1582.7 | <b>uVSLuGTGSGLQF-NH<sub>3</sub></b>   |
| 240.1 <sup>+2</sup> | <b>y<sub>4</sub>-NH<sub>3</sub><sup>+2</sup></b> | 516.3                           | <b>TGSGLQ-28</b>                                              | 763.4               | <b>VSLuGTG-28</b>                                 | 1108.5 | <b>uGTGSGLQFT-NH<sub>3</sub></b>    | 1585.7 | <b>b<sub>13</sub></b>                 |
| 240.1               | <b>SGL-H<sub>2</sub>O</b>                        | 519.3                           | <b>GLQFT-28</b>                                               | 764.4               | <b>GSGQLQFT-28</b>                                | 1109.5 | <b>LuGTGSGLQF-28</b>                | 1599.7 | <b>uVSLuGTGSGLQF</b>                  |
| 242.1               | <b>LQ</b>                                        | 520.3                           | <b>LuGT-28</b>                                                | 764.4               | <b>TGSGLQFT-28</b>                                | 1113.5 | <b>b<sub>7</sub></b>                | 1653.8 | <b>y<sub>15</sub>-H<sub>2</sub>O</b>  |
| 245.1               | <b>b<sub>2</sub>-NH<sub>3</sub></b>              | 520.3 <sup>+</sup> <sub>2</sub> | <b>y<sub>10</sub><sup>+2</sup></b>                            | 773.4               | <b>VSLuGTG-H<sub>2</sub>O</b>                     | 1119.5 | <b>LuGTGSGLQF-H<sub>2</sub>O</b>    | 1654.8 | <b>y<sub>15</sub>-NH<sub>3</sub></b>  |
| 246.1               | <b>TGS</b>                                       | 521.2                           | <b>b<sub>3</sub>-NH<sub>3</sub></b>                           | 774.4               | <b>GSGQLQFT-H<sub>2</sub>O</b>                    | 1120.5 | <b>LuGTGSGLQF-NH<sub>3</sub></b>    | 1668.8 | <b>a<sub>14</sub>-NH<sub>3</sub></b>  |
| 248.1               | <b>QF-28</b>                                     | 526.3                           | <b>TGSGLQ-H<sub>2</sub>O</b>                                  | 774.4               | <b>TGSGLQFT-H<sub>2</sub>O</b>                    | 1124.5 | <b>NuVSLuGT</b>                     | 1671.8 | <b>y<sub>15</sub></b>                 |
| 248.2               | <b>y<sub>2</sub></b>                             | 527.2                           | <b>TGSGLQ-NH<sub>3</sub></b>                                  | 775.4               | <b>TGSGLQFT-NH<sub>3</sub></b>                    | 1125.5 | <b>a<sub>8</sub>-NH<sub>3</sub></b> | 1672.8 | <b>uVSLuGTGSGLQFT-28</b>              |
| 248.6 <sup>+2</sup> | <b>y<sub>4</sub><sup>+2</sup></b>                | 529.3                           | <b>GLQFT-H<sub>2</sub>O</b>                                   | 775.4               | <b>GSGQLQFT-NH<sub>3</sub></b>                    | 1125.5 | <b>uGTGSGLQFT</b>                   | 1682.8 | <b>uVSLuGTGSGLQFT-H<sub>2</sub>O</b>  |
| 249.1               | <b>FT</b>                                        | 530.2                           | <b>LuGT-H<sub>2</sub>O</b>                                    | 776.4               | <b>y<sub>7</sub>-H<sub>2</sub>O</b>               | 1126.5 | <b>uVSLuGTGS-28</b>                 | 1683.8 | <b>uVSLuGTGSGLQFT-NH<sub>3</sub></b>  |
| 258.1               | <b>SGL</b>                                       | 530.3                           | <b>GLQFT-NH<sub>3</sub></b>                                   | 777.4               | <b>y<sub>7</sub>-NH<sub>3</sub></b>               | 1136.5 | <b>uVSLuGTGS-H<sub>2</sub>O</b>     | 1685.8 | <b>a<sub>14</sub></b>                 |
| 259.1               | <b>QF-NH<sub>3</sub></b>                         | 533.3                           | <b>SGLQF</b>                                                  | 777.9 <sup>+2</sup> | <b>y<sub>14</sub>-H<sub>2</sub>O<sup>+2</sup></b> | 1137.5 | <b>LuGTGSGLQF</b>                   | 1685.8 | <b>NuVSLuGTGSGLQF-28</b>              |
| 262.1               | <b>b<sub>2</sub></b>                             | 534.2                           | <b>SLuG</b>                                                   | 778.4 <sup>+2</sup> | <b>y<sub>14</sub>-NH<sub>3</sub><sup>+2</sup></b> | 1142.5 | <b>a<sub>8</sub></b>                | 1695.8 | <b>b<sub>14</sub>-H<sub>2</sub>O</b>  |
| 271.2               | <b>GLQ-28</b>                                    | 538.2                           | <b>b<sub>3</sub></b>                                          | 779.3               | <b>SLuGTGS</b>                                    | 1148.6 | <b>VSLuGTGSGLQ-28</b>               | 1695.8 | <b>NuVSLuGTGSGLQF-H<sub>2</sub>O</b>  |
| 272.2               | <b>VSL-28</b>                                    | 539.1 <sup>2</sup> <sub>+</sub> | <b>y<sub>11</sub><sup>-</sup>-H<sub>2</sub>O<sup>+2</sup></b> | 786.9 <sup>+2</sup> | <b>y<sub>14</sub><sup>+2</sup></b>                | 1152.5 | <b>b<sub>8</sub>-H<sub>2</sub>O</b> | 1696.8 | <b>b<sub>14</sub>-NH<sub>3</sub></b>  |
| 275.1               | <b>TGSGL-28</b>                                  | 540.3 <sup>+</sup> <sub>2</sub> | <b>y<sub>11</sub><sup>-</sup>-NH<sub>3</sub><sup>+2</sup></b> | 791.4               | <b>VSLuGTG</b>                                    | 1153.5 | <b>b<sub>8</sub>-NH<sub>3</sub></b> | 1696.8 | <b>NuVSLuGTGSGLQF-NH<sub>3</sub></b>  |
| 275.1               | <b>GTGS-28</b>                                   | 544.3                           | <b>TGSGLQ</b>                                                 | 792.4               | <b>a<sub>6</sub>-NH<sub>3</sub></b>               | 1153.5 | <b>NuVSLuGTG-28</b>                 | 1700.8 | <b>uVSLuGTGSGLQFT</b>                 |
| 276.1               | <b>QF</b>                                        | 547.3                           | <b>GLQFT</b>                                                  | 792.4               | <b>TGSGLQFT</b>                                   | 1154.5 | <b>uVSLuGTGS</b>                    | 1713.8 | <b>b<sub>14</sub></b>                 |
| 282.1               | <b>GLQ-NH<sub>3</sub></b>                        | 548.3                           | <b>LuGT</b>                                                   | 792.4               | <b>GSGQLQFT</b>                                   | 1158.6 | <b>VSLuGTGSGLQ-H<sub>2</sub>O</b>   | 1713.8 | <b>NuVSLuGTGSGLQF</b>                 |
| 282.2               | <b>VSL-H<sub>2</sub>O</b>                        | 548.3                           | <b>VSLu-28</b>                                                | 794.4               | <b>y<sub>7</sub></b>                              | 1159.5 | <b>VSLuGTGSGLQ-NH<sub>3</sub></b>   | 1773.8 | <b>uVSLuGTGSGLQFTT-28</b>             |
| 285.1               | <b>GTGS-H<sub>2</sub>O</b>                       | 548.3                           | <b>uVSL-28</b>                                                | 808.4               | <b>SLuGTGS-28</b>                                 | 1163.5 | <b>NuVSLuGTG-H<sub>2</sub>O</b>     | 1783.8 | <b>uVSLuGTGSGLQFTT-H<sub>2</sub>O</b> |

|                     |                                                  |                                 |                                    |                        |                                                   |        |                                     |        |                                         |
|---------------------|--------------------------------------------------|---------------------------------|------------------------------------|------------------------|---------------------------------------------------|--------|-------------------------------------|--------|-----------------------------------------|
| 285.1               | <b>TGSG-H<sub>2</sub>O</b>                       | 548.8 <sup>+</sup> <sub>2</sub> | <b>y<sub>11</sub><sup>+2</sup></b> | 809.4                  | <b>a<sub>6</sub></b>                              | 1164.5 | <b>NuVSLuGTG-NH<sub>3</sub></b>     | 1784.8 | <b>uVSLuGTGSGLQFTT-NH<sub>3</sub></b>   |
| 287.2               | <b>GSGL-28</b>                                   | 549.3                           | <b>NuVS-28</b>                     | 818.4                  | <b>SLuGTGS G-H<sub>2</sub>O</b>                   | 1170.5 | <b>b<sub>8</sub></b>                | 1786.8 | <b>NuVSLuGTGSG LQFT-28</b>              |
| 297.2               | <b>GSGL-H<sub>2</sub>O</b>                       | 551.2                           | <b>uGTGS-28</b>                    | 819.4                  | <b>b<sub>6</sub>-H<sub>2</sub>O</b>               | 1176.6 | <b>VSLuGTGSGLQ</b>                  | 1796.8 | <b>NuVSLuGTGSG LQFT-H<sub>2</sub>O</b>  |
| 299.2               | <b>GLQ</b>                                       | 558.3                           | <b>VSLu-H<sub>2</sub>O</b>         | 820.4                  | <b>b<sub>6</sub>-NH<sub>3</sub></b>               | 1181.5 | <b>NuVSLuGTG</b>                    | 1797.8 | <b>NuVSLuGTGSG LQFT-NH<sub>3</sub></b>  |
| 300.2               | <b>VSL</b>                                       | 558.3                           | <b>uVSL-H<sub>2</sub>O</b>         | 821.4                  | <b>GTGSGLQ FT-28</b>                              | 1183.5 | <b>uVSLuGTGSG-28</b>                | 1801.8 | <b>uVSLuGTGSGLQFTT</b>                  |
| 303.1               | <b>TGSG</b>                                      | 559.2                           | <b>NuVS-H<sub>2</sub>O</b>         | 824.4                  | <b>uVSLu-28</b>                                   | 1193.5 | <b>uVSLuGTGSG-H<sub>2</sub>O</b>    | 1814.8 | <b>NuVSLuGTGSG LQFT</b>                 |
| 303.1               | <b>GTGS</b>                                      | 560.2                           | <b>NuVS-NH<sub>3</sub></b>         | 827.4201 <sup>+2</sup> | <b>y<sub>15</sub>-H<sub>2</sub>O<sup>+2</sup></b> | 1196.6 | <b>SLuGTGSGLQ F-28</b>              | 1815.8 | <b>a<sub>15</sub>-NH<sub>3</sub></b>    |
| 303.7 <sup>+2</sup> | <b>y<sub>5</sub>-H<sub>2</sub>O<sup>+2</sup></b> | 561.2                           | <b>uGTGS-H<sub>2</sub>O</b>        | 827.9121 <sup>+2</sup> | <b>y<sub>15</sub>-NH<sub>3</sub><sup>+2</sup></b> | 1198.6 | <b>uGTGSGLQFT T-28</b>              | 1832.9 | <b>a<sub>15</sub></b>                   |
| 304.2 <sup>+2</sup> | <b>y<sub>5</sub>-NH<sub>3</sub><sup>+2</sup></b> | 562.3                           | <b>GSGLQ F-28</b>                  | 831.4                  | <b>GTGSGLQ FT-H<sub>2</sub>O</b>                  | 1206.6 | <b>SLuGTGSGLQ F-H<sub>2</sub>O</b>  | 1842.8 | <b>b<sub>15</sub>-H<sub>2</sub>O</b>    |
| 306.1               | <b>uG-28</b>                                     | 563.3                           | <b>LQFTT-28</b>                    | 832.4                  | <b>GTGSGLQ FT-NH<sub>3</sub></b>                  | 1207.5 | <b>SLuGTGSGLQ F-NH<sub>3</sub></b>  | 1843.8 | <b>b<sub>15</sub>-NH<sub>3</sub></b>    |
| 312.7 <sup>+2</sup> | <b>y<sub>5</sub><sup>+2</sup></b>                | 572.3                           | <b>GSGLQ F-H<sub>2</sub>O</b>      | 834.4                  | <b>uVSLu-H<sub>2</sub>O</b>                       | 1208.5 | <b>uGTGSGLQFT T-H<sub>2</sub>O</b>  | 1860.8 | <b>b<sub>15</sub></b>                   |
| 315.2               | <b>GSGL</b>                                      | 573.3                           | <b>GSGLQ F-NH<sub>3</sub></b>      | 834.4                  | <b>LuGTGSG L-28</b>                               | 1209.5 | <b>uGTGSGLQFT T-NH<sub>3</sub></b>  | 1887.9 | <b>NuVSLuGTGSG LQFTT-28</b>             |
| 322.2               | <b>FTT-28</b>                                    | 573.3                           | <b>GTGSG LQ-28</b>                 | 836.4                  | <b>SLuGTGS G</b>                                  | 1210.6 | <b>LuGTGSGLQF T-28</b>              | 1897.9 | <b>NuVSLuGTGSG LQFTT-H<sub>2</sub>O</b> |
| 331.2               | <b>y<sub>3</sub>-H<sub>2</sub>O</b>              | 573.3                           | <b>LQFTT-H<sub>2</sub>O</b>        | 836.4254 <sup>+2</sup> | <b>y<sub>15</sub><sup>+2</sup></b>                | 1211.5 | <b>uVSLuGTGSG</b>                   | 1898.9 | <b>NuVSLuGTGSG LQFTT-NH<sub>3</sub></b> |
| 332.2               | <b>GTGSG-28</b>                                  | 574.3                           | <b>LQFTT-NH<sub>3</sub></b>        | 837.4                  | <b>b<sub>6</sub></b>                              | 1220.6 | <b>LuGTGSGLQF T-H<sub>2</sub>O</b>  | 1915.9 | <b>NuVSLuGTGSG LQFTT</b>                |
| 332.2               | <b>FTT-H<sub>2</sub>O</b>                        | 576.3                           | <b>VSLu</b>                        | 844.4                  | <b>LuGTGSG L-H<sub>2</sub>O</b>                   | 1221.6 | <b>LuGTGSGLQF T-NH<sub>3</sub></b>  | 1916.9 | <b>a<sub>16</sub>-NH<sub>3</sub></b>    |
| 332.2               | <b>y<sub>3</sub>-NH<sub>3</sub></b>              | 576.3                           | <b>uVSL</b>                        | 849.4                  | <b>uGTGSGLQ-28</b>                                | 1224.6 | <b>SLuGTGSGLQ F</b>                 | 1929.9 | <b>y<sub>16</sub>-H<sub>2</sub>O</b>    |
| 334.1               | <b>uG</b>                                        | 577.2                           | <b>NuVS</b>                        | 849.4                  | <b>GTGSGLQ FT</b>                                 | 1226.5 | <b>a<sub>9</sub>-NH<sub>3</sub></b> | 1930.9 | <b>y<sub>16</sub>-NH<sub>3</sub></b>    |
| 342.1               | <b>GTGSG-H<sub>2</sub>O</b>                      | 577.3                           | <b>LuGTG-28</b>                    | 850.4                  | <b>VSLuGTGS-28</b>                                | 1226.6 | <b>uGTGSGLQFT T</b>                 | 1933.9 | <b>a<sub>16</sub></b>                   |
| 348.2               | <b>uV-28</b>                                     | 579.2                           | <b>uGTGS</b>                       | 852.4                  | <b>uVSLu</b>                                      | 1238.6 | <b>LuGTGSGLQF T</b>                 | 1943.9 | <b>b<sub>16</sub>-H<sub>2</sub>O</b>    |

|                            |                                                  |       |                                     |           |                                       |            |                                            |        |                                      |
|----------------------------|--------------------------------------------------|-------|-------------------------------------|-----------|---------------------------------------|------------|--------------------------------------------|--------|--------------------------------------|
| 349.2                      | <b>QFT-28</b>                                    | 583.3 | <b>GTGSG<br/>LQ-H<sub>2</sub>O</b>  | 859.<br>4 | <b>uGTGSGL<br/>Q-H<sub>2</sub>O</b>   | 1240.<br>6 | <b>NuVSLu<br/>GTGS-<br/>28</b>             | 1944.9 | <b>b<sub>16</sub>-NH<sub>3</sub></b> |
| 349.2                      | <b>y<sub>3</sub></b>                             | 584.3 | <b>GTGSG<br/>LQ-NH<sub>3</sub></b>  | 860.<br>4 | <b>uGTGSGL<br/>Q-NH<sub>3</sub></b>   | 1243.<br>6 | <b>a<sub>9</sub></b>                       | 1947.9 | <b>y<sub>16</sub></b>                |
| 350.2                      | <b>FTT</b>                                       | 587.3 | <b>LuGTG-<br/>H<sub>2</sub>O</b>    | 860.<br>4 | <b>VSLuGTGS<br/>-H<sub>2</sub>O</b>   | 1250.<br>5 | <b>NuVSLu<br/>GTGS-<br/>H<sub>2</sub>O</b> | 1961.9 | <b>b<sub>16</sub></b>                |
| 358.2                      | <b>SGLQ-<br/>28</b>                              | 590.3 | <b>GSGQLQ<br/>F</b>                 | 862.<br>4 | <b>LuGTGSG<br/>L</b>                  | 1251.<br>5 | <b>NuVSLu<br/>GTGS-<br/>NH<sub>3</sub></b> | 2017.9 | <b>a<sub>17</sub>-NH<sub>3</sub></b> |
| 359.2                      | <b>QFT-<br/>H<sub>2</sub>O</b>                   | 591.3 | <b>LQFTT</b>                        | 863.<br>5 | <b>y<sub>8</sub>-H<sub>2</sub>O</b>   | 1253.<br>6 | <b>b<sub>9</sub>-H<sub>2</sub>O</b>        | 2035.0 | <b>a<sub>17</sub></b>                |
| 360.2                      | <b>GTGSG</b>                                     | 592.3 | <b>a<sub>4</sub>-NH<sub>3</sub></b> | 864.<br>4 | <b>y<sub>8</sub>-NH<sub>3</sub></b>   | 1254.<br>5 | <b>b<sub>9</sub>-NH<sub>3</sub></b>        | 2044.0 | <b>y<sub>17</sub>-H<sub>2</sub>O</b> |
| 360.2                      | <b>QFT-<br/>NH<sub>3</sub></b>                   | 601.3 | <b>GTGSG<br/>LQ</b>                 | 865.<br>4 | <b>TGSGQLQF<br/>TT-28</b>             | 1268.<br>5 | <b>NuVSLu<br/>GTGS</b>                     | 2044.9 | <b>b<sub>17</sub>-H<sub>2</sub>O</b> |
| 360.2<br>080 <sup>+2</sup> | <b>y<sub>6</sub>-H<sub>2</sub>O<sup>+2</sup></b> | 605.3 | <b>LuGTG</b>                        | 875.<br>4 | <b>TGSGQLQF<br/>TT-H<sub>2</sub>O</b> | 1271.<br>6 | <b>b<sub>9</sub></b>                       | 2045.0 | <b>y<sub>17</sub>-NH<sub>3</sub></b> |
| 360.7<br>000 <sup>+2</sup> | <b>y<sub>6</sub>-NH<sub>3</sub><sup>+2</sup></b> | 605.3 | <b>VSLuG-<br/>28</b>                | 876.<br>4 | <b>TGSGQLQF<br/>TT-NH<sub>3</sub></b> | 1283.<br>6 | <b>a<sub>10</sub>-NH<sub>3</sub></b>       | 2045.9 | <b>b<sub>17</sub>-NH<sub>3</sub></b> |
| 361.2                      | <b>LQF-28</b>                                    | 606.3 | <b>SGLQF<br/>T-28</b>               | 877.<br>4 | <b>uGTGSGL<br/>Q</b>                  | 1295.<br>6 | <b>VSLuGT<br/>GSGLQ<br/>F-28</b>           | 2062.0 | <b>y<sub>17</sub></b>                |
| 362.2                      | <b>Lu-28</b>                                     | 606.3 | <b>y<sub>5</sub>-H<sub>2</sub>O</b> | 878.<br>4 | <b>VSLuGTGS</b>                       | 1296.<br>6 | <b>uVSLuG<br/>TGSGL-<br/>28</b>            | 2062.9 | <b>b<sub>17</sub></b>                |
| 363.2                      | <b>Nu-28</b>                                     | 607.3 | <b>SLuGT-<br/>28</b>                | 881.<br>4 | <b>uVSLuG-28</b>                      | 1297.<br>6 | <b>NuVSLu<br/>GTGSG-<br/>28</b>            | 2191.0 | <b>MH-H<sub>2</sub>O</b>             |
| 368.2                      | <b>SGLQ-<br/>H<sub>2</sub>O</b>                  | 607.3 | <b>y<sub>5</sub>-NH<sub>3</sub></b> | 881.<br>5 | <b>y<sub>8</sub></b>                  | 1297.<br>6 | <b>SLuGT<br/>GSGLQ<br/>FT-28</b>           | 2192.0 | <b>MH-NH<sub>3</sub></b>             |
| 369.2                      | <b>SGLQ-<br/>NH<sub>3</sub></b>                  | 608.3 | <b>uGTGS<br/>G-28</b>               | 891.<br>4 | <b>uVSLuG-<br/>H<sub>2</sub>O</b>     | 1300.<br>6 | <b>a<sub>10</sub></b>                      | 2209.1 | <b>MH</b>                            |
| 369.2<br>132 <sup>+2</sup> | <b>y<sub>6</sub><sup>+2</sup></b>                | 609.3 | <b>a<sub>4</sub></b>                | 893.<br>4 | <b>TGSGQLQF<br/>TT</b>                | 1305.<br>6 | <b>VSLuGTGSGLQF-H<sub>2</sub>O</b>         |        |                                      |
| 372.2                      | <b>LQF-<br/>NH<sub>3</sub></b>                   | 615.3 | <b>VSLuG-<br/>H<sub>2</sub>O</b>    | 907.<br>4 | <b>VSLuGTGS<br/>G-28</b>              | 1306.<br>6 | <b>uVSLuGTGSGL-H<sub>2</sub>O</b>          |        |                                      |
| 374.1                      | <b>Nu-NH<sub>3</sub></b>                         | 616.3 | <b>SGLQF<br/>T-H<sub>2</sub>O</b>   | 909.<br>4 | <b>uVSLuG</b>                         | 1306.<br>6 | <b>VSLuGTGSGLQF-NH<sub>3</sub></b>         |        |                                      |
| 376.2                      | <b>uV</b>                                        | 617.3 | <b>SLuGT-<br/>H<sub>2</sub>O</b>    | 917.<br>4 | <b>VSLuGTGS<br/>G-H<sub>2</sub>O</b>  | 1307.<br>6 | <b>NuVSLuGTGSG-H<sub>2</sub>O</b>          |        |                                      |

# FNNVSLNGTGSGLQFTTK

## MS/MS on C13 isotope

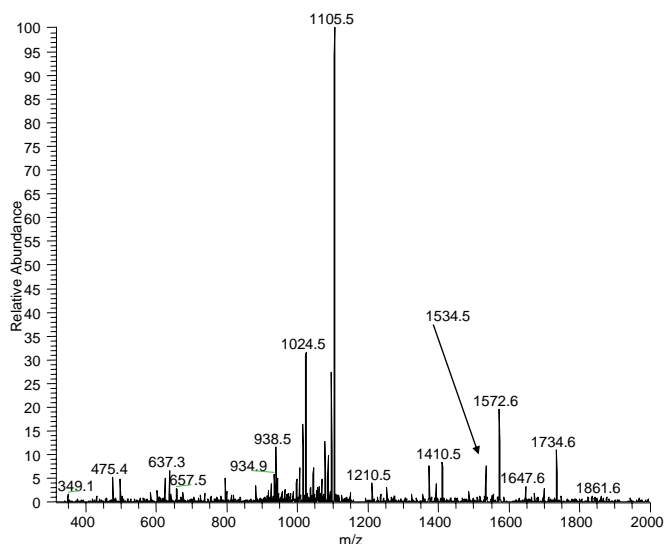

|                     |                                                |                     |                                                |       |                                  |                      |                                                 |        |                                   |
|---------------------|------------------------------------------------|---------------------|------------------------------------------------|-------|----------------------------------|----------------------|-------------------------------------------------|--------|-----------------------------------|
| 60.0                | S                                              | 388.7 <sup>+2</sup> | y <sub>7</sub> -H <sub>2</sub> O <sup>+2</sup> | 679.3 | a <sub>5</sub> -NH <sub>3</sub>  | 1022.5               | y <sub>10</sub> -NH <sub>3</sub>                | 1469.7 | SLvGTGSGLQFT-H <sub>2</sub> O     |
| 65.5 <sup>+2</sup>  | y <sub>1</sub> -NH <sub>3</sub> <sup>+2</sup>  | 389.2 <sup>+2</sup> | y <sub>7</sub> -NH <sub>3</sub> <sup>+2</sup>  | 682.3 | LvGT-28                          | 1024.5               | LvGTGSGL                                        | 1470.6 | NuVSLvGTGSG-NH <sub>3</sub>       |
| 72.1                | V                                              | 389.2               | LQF                                            | 690.3 | NuVSL                            | 1039.4               | vGTGSGL<br>Q                                    | 1470.6 | SLvGTGSGLQFT-NH <sub>3</sub>      |
| 74.1                | T                                              | 391.1               | Nu                                             | 691.3 | GSGGLQFT                         | 1039.5               | y <sub>10</sub>                                 | 1472.6 | b <sub>10</sub> -H <sub>2</sub> O |
| 74.1 <sup>+2</sup>  | y <sub>1</sub> <sup>+2</sup>                   | 397.7 <sup>+2</sup> | y <sub>7</sub> <sup>+2</sup>                   | 691.3 | TGSGLQF                          | 1040.5               | VSLvGTGS                                        | 1473.6 | b <sub>10</sub> -NH <sub>3</sub>  |
| 84.1                | Q                                              | 398.2               | TGSGL-<br>H <sub>2</sub> O                     | 692.3 | LvGT-H <sub>2</sub> O            | 1043.5               | uVSLvG-28                                       | 1473.7 | LvGTGSGLQFTT-28                   |
| 84.1                | K                                              | 415.2               | GSGGLQ-28                                      | 696.3 | SLvG                             | 1046.5 <sup>+2</sup> | y <sub>16</sub> -H <sub>2</sub> O <sup>+2</sup> | 1483.7 | LvGTGSGLQFTT-H <sub>2</sub> O     |
| 86.1                | L                                              | 416.2               | TGSGL                                          | 696.3 | a <sub>5</sub>                   | 1047.0 <sup>+2</sup> | y <sub>16</sub> -NH <sub>3</sub> <sup>+2</sup>  | 1484.7 | LvGTGSGLQFTT-NH <sub>3</sub>      |
| 87.1                | N                                              | 418.2               | GLQF-28                                        | 706.3 | b <sub>5</sub> -H <sub>2</sub> O | 1053.4               | uVSLvG-<br>H <sub>2</sub> O                     | 1485.7 | VSLvGTGSGLQF                      |
| 101.1               | Q                                              | 425.2               | GSGGLQ-<br>H <sub>2</sub> O                    | 707.3 | b <sub>5</sub> -NH <sub>3</sub>  | 1055.5 <sup>+2</sup> | y <sub>16</sub> <sup>+2</sup>                   | 1486.7 | uVSLvGTGSGL                       |
| 101.1               | K                                              | 426.2               | GSGGLQ-<br>NH <sub>3</sub>                     | 707.4 | SGLQFTT-28                       | 1069.5               | VSLvGTGS<br>G-28                                | 1487.6 | NuVSLvGTGSG                       |
| 115.6 <sup>+2</sup> | y <sub>2</sub> -H <sub>2</sub> O <sup>+2</sup> | 429.2               | GLQF-NH <sub>3</sub>                           | 710.3 | LvGT                             | 1071.5               | uVSLvG                                          | 1487.7 | SLvGTGSGLQFT                      |
| 116.1 <sup>+2</sup> | y <sub>2</sub> -NH <sub>3</sub> <sup>+2</sup>  | 432.2 <sup>+2</sup> | y <sub>8</sub> -H <sub>2</sub> O <sup>+2</sup> | 710.3 | VSLv-28                          | 1078.6               | y <sub>11</sub> -H <sub>2</sub> O               | 1490.6 | b <sub>10</sub>                   |
| 117.1               | SG-28                                          | 432.7 <sup>+2</sup> | y <sub>8</sub> -NH <sub>3</sub> <sup>+2</sup>  | 713.3 | vGTGS-28                         | 1079.5               | VSLvGTGS<br>G-H <sub>2</sub> O                  | 1501.7 | LvGTGSGLQFTT                      |



|                     |                                     |                     |                                                  |                     |                                                   |                      |                                                   |        |                                      |
|---------------------|-------------------------------------|---------------------|--------------------------------------------------|---------------------|---------------------------------------------------|----------------------|---------------------------------------------------|--------|--------------------------------------|
| 117.1               | <b>GS-28</b>                        | 435.2               | <b>uVS-28</b>                                    | 717.4               | <b>SGLQFTT-H<sub>2</sub>O</b>                     | 1079.5               | <b>y<sub>11</sub>-NH<sub>3</sub></b>              | 1516.7 | <b>y<sub>12</sub>-H<sub>2</sub>O</b> |
| 120.1               | <b>F</b>                            | 441.2 <sup>+2</sup> | <b>y<sub>8</sub><sup>+2</sup></b>                | 718.3               | <b>SGLQFTT-NH<sub>3</sub></b>                     | 1083.5               | <b>SLvGTGS<br/>GL-28</b>                          | 1517.7 | <b>y<sub>12</sub>-NH<sub>3</sub></b> |
| 124.6 <sup>+2</sup> | <b>y<sub>2</sub><sup>+2</sup></b>   | 443.2               | <b>GSSLQ</b>                                     | 719.4               | <b>y<sub>6</sub>-H<sub>2</sub>O</b>               | 1093.5               | <b>SLvGTGS<br/>GL-H<sub>2</sub>O</b>              | 1532.6 | <b>a<sub>11</sub>-NH<sub>3</sub></b> |
| 126.1               | <b>K</b>                            | 445.2               | <b>uVS-H<sub>2</sub>O</b>                        | 720.3               | <b>VSLv-H<sub>2</sub>O</b>                        | 1096.6               | <b>y<sub>11</sub></b>                             | 1534.7 | <b>y<sub>12</sub></b>                |
| 127.1               | <b>SG-H<sub>2</sub>O</b>            | 445.2               | <b>GTGSGL-<br/>28</b>                            | 720.4               | <b>GTGSGLQF-28</b>                                | 1097.5               | <b>VSLvGTGS<br/>G</b>                             | 1549.7 | <b>a<sub>11</sub></b>                |
| 127.1               | <b>GS-H<sub>2</sub>O</b>            | 446.2               | <b>GLQF</b>                                      | 720.4               | <b>y<sub>6</sub>-NH<sub>3</sub></b>               | 1100.5               | <b>NuVSLv-28</b>                                  | 1558.7 | <b>VSLvGTGSGLQFT-28</b>              |
| 129.1               | <b>Q</b>                            | 450.2               | <b>QFTT-28</b>                                   | 723.3               | <b>vGTGS-H<sub>2</sub>O</b>                       | 1103.5 <sup>+2</sup> | <b>y<sub>17</sub>-H<sub>2</sub>O<sup>+2</sup></b> | 1559.7 | <b>b<sub>11</sub>-H<sub>2</sub>O</b> |
| 129.1               | <b>K</b>                            | 455.2               | <b>GTGSGL-<br/>H<sub>2</sub>O</b>                | 724.3               | <b>b<sub>5</sub></b>                              | 1104.1 <sup>+2</sup> | <b>y<sub>17</sub>-NH<sub>3</sub><sup>+2</sup></b> | 1560.6 | <b>b<sub>11</sub>-NH<sub>3</sub></b> |
| 130.1               | <b>y<sub>1</sub>-NH<sub>3</sub></b> | 460.2               | <b>QFTT-H<sub>2</sub>O</b>                       | 730.4               | <b>GTGSGLQF-<br/>H<sub>2</sub>O</b>               | 1110.5               | <b>NuVSLv-<br/>H<sub>2</sub>O</b>                 | 1560.7 | <b>SLvGTGSGLQFTT-28</b>              |
| 131.1               | <b>TG-28</b>                        | 460.8 <sup>+2</sup> | <b>y<sub>9</sub>-H<sub>2</sub>O<sup>+2</sup></b> | 731.3               | <b>GTGSGLQF-<br/>NH<sub>3</sub></b>               | 1111.5               | <b>NuVSLv-<br/>NH<sub>3</sub></b>                 | 1568.7 | <b>VSLvGTGSGLQFT-H<sub>2</sub>O</b>  |
| 131.1               | <b>GT-28</b>                        | 461.2               | <b>QFTT-NH<sub>3</sub></b>                       | 735.4               | <b>SGLQFTT</b>                                    | 1111.5               | <b>SLvGTGS<br/>GL</b>                             | 1569.7 | <b>VSLvGTGSGLQFT-NH<sub>3</sub></b>  |
| 141.1               | <b>GT-H<sub>2</sub>O</b>            | 461.2 <sup>+2</sup> | <b>y<sub>9</sub>-NH<sub>3</sub><sup>+2</sup></b> | 737.4               | <b>y<sub>6</sub></b>                              | 1112.5 <sup>+2</sup> | <b>y<sub>17</sub><sup>+2</sup></b>                | 1570.7 | <b>SLvGTGSGLQFTT-H<sub>2</sub>O</b>  |
| 141.1               | <b>TG-H<sub>2</sub>O</b>            | 462.2               | <b>NuV-28</b>                                    | 738.3               | <b>VSLv</b>                                       | 1124.5               | <b>LvGTGSGL<br/>Q-28</b>                          | 1571.7 | <b>SLvGTGSGLQFTT-NH<sub>3</sub></b>  |
| 143.1               | <b>GL-28</b>                        | 462.3               | <b>LQFT-28</b>                                   | 739.3               | <b>LvGTG-28</b>                                   | 1128.5               | <b>NuVSLv</b>                                     | 1572.7 | <b>NuVSLvGTGSGL-28</b>               |
| 145.1               | <b>SG</b>                           | 463.2               | <b>uVS</b>                                       | 741.3               | <b>vGTGS</b>                                      | 1134.5               | <b>LvGTGSGL<br/>Q-H<sub>2</sub>O</b>              | 1577.7 | <b>b<sub>11</sub></b>                |
| 145.1               | <b>GS</b>                           | 468.2               | <b>vG-28</b>                                     | 748.4               | <b>GTGSGLQF</b>                                   | 1135.5               | <b>LvGTGSGL<br/>Q-NH<sub>3</sub></b>              | 1582.7 | <b>NuVSLvGTGSGL-H<sub>2</sub>O</b>   |
| 147.1               | <b>y<sub>1</sub></b>                | 469.8 <sup>+2</sup> | <b>y<sub>9</sub><sup>+2</sup></b>                | 749.3               | <b>LvGTG-H<sub>2</sub>O</b>                       | 1144.5               | <b>uVSLvGT-<br/>28</b>                            | 1583.7 | <b>NuVSLvGTGSGL-NH<sub>3</sub></b>   |
| 159.1               | <b>TG</b>                           | 472.3               | <b>LQFT-H<sub>2</sub>O</b>                       | 758.9 <sup>+2</sup> | <b>y<sub>12</sub>-H<sub>2</sub>O<sup>+2</sup></b> | 1152.5               | <b>LvGTGSGL<br/>Q</b>                             | 1586.7 | <b>uVSLvGTGSGLQ-28</b>               |
| 159.1               | <b>GT</b>                           | 473.2               | <b>NuV-NH<sub>3</sub></b>                        | 759.4 <sup>+2</sup> | <b>y<sub>12</sub>-NH<sub>3</sub><sup>+2</sup></b> | 1154.5               | <b>uVSLvGT-<br/>H<sub>2</sub>O</b>                | 1586.7 | <b>VSLvGTGSGLQFT</b>                 |
| 159.1               | <b>VS-28</b>                        | 473.2               | <b>GTGSGL</b>                                    | 764.4               | <b>GSSLQFTT-28</b>                                | 1157.5               | <b>NuVSLvG-<br/>28</b>                            | 1588.7 | <b>SLvGTGSGLQFTT</b>                 |

|                     |                                                  |                     |                                                   |                     |                                     |                      |                                       |        |                                      |
|---------------------|--------------------------------------------------|---------------------|---------------------------------------------------|---------------------|-------------------------------------|----------------------|---------------------------------------|--------|--------------------------------------|
| 166.1 <sup>+2</sup> | <b>y<sub>3</sub>-H<sub>2</sub>O<sup>+2</sup></b> | 473.2               | <b>LQFT-NH<sub>3</sub></b>                        | 764.4               | <b>TGSGQLQFT-28</b>                 | 1158.5               | <b>vGTGSGL QF-28</b>                  | 1589.7 | <b>a<sub>12</sub>-NH<sub>3</sub></b> |
| 166.6 <sup>+2</sup> | <b>y<sub>3</sub>-NH<sub>3</sub><sup>+2</sup></b> | 478.2               | <b>QFTT</b>                                       | 767.3               | <b>LvGTG</b>                        | 1167.5               | <b>NuVSLvG-H<sub>2</sub>O</b>         | 1596.7 | <b>uVSLvGTGSGLQ-H<sub>2</sub>O</b>   |
| 169.1               | <b>VS-H<sub>2</sub>O</b>                         | 478.3               | <b>y<sub>4</sub>-H<sub>2</sub>O</b>               | 767.4               | <b>VSLvG-28</b>                     | 1168.5               | <b>NuVSLvG-NH<sub>3</sub></b>         | 1597.7 | <b>uVSLvGTGSGLQ-NH<sub>3</sub></b>   |
| 171.1               | <b>GL</b>                                        | 479.3               | <b>y<sub>4</sub>-NH<sub>3</sub></b>               | 767.9 <sup>+2</sup> | <b>y<sub>12</sub><sup>+2</sup></b>  | 1168.5               | <b>vGTGSGL QF-H<sub>2</sub>O</b>      | 1600.7 | <b>NuVSLvGTGSGL</b>                  |
| 173.1               | <b>SL-28</b>                                     | 490.2               | <b>NuV</b>                                        | 769.3               | <b>SLvGT-28</b>                     | 1169.5               | <b>vGTGSGL QF-NH<sub>3</sub></b>      | 1606.7 | <b>a<sub>12</sub></b>                |
| 174.1               | <b>GSG-28</b>                                    | 490.3               | <b>LQFT</b>                                       | 770.3               | <b>vGTGS-28</b>                     | 1172.5               | <b>uVSLvGT</b>                        | 1614.7 | <b>uVSLvGTGSGLQ</b>                  |
| 175.1               | <b>TT-28</b>                                     | 493.2               | <b>a<sub>3</sub>-NH<sub>3</sub></b>               | 774.4               | <b>GSGLQFTT-H<sub>2</sub>O</b>      | 1177.1 <sup>+2</sup> | <b>MH-H<sub>2</sub>O<sup>+2</sup></b> | 1616.7 | <b>b<sub>12</sub>-H<sub>2</sub>O</b> |
| 175.1 <sup>+2</sup> | <b>y<sub>3</sub><sup>+2</sup></b>                | 496.2               | <b>vG</b>                                         | 774.4               | <b>TGSGQLQFT-H<sub>2</sub>O</b>     | 1177.5 <sup>+2</sup> | <b>MH-NH<sub>3</sub><sup>+2</sup></b> | 1617.7 | <b>b<sub>12</sub>-NH<sub>3</sub></b> |
| 183.1               | <b>SL-H<sub>2</sub>O</b>                         | 496.3               | <b>y<sub>4</sub></b>                              | 775.4               | <b>TGSGQLQFT-NH<sub>3</sub></b>     | 1182.6               | <b>VSLvGTGS GL-28</b>                 | 1629.8 | <b>y<sub>13</sub>-H<sub>2</sub>O</b> |
| 184.1               | <b>GSG-H<sub>2</sub>O</b>                        | 505.3               | <b>SGLQF-28</b>                                   | 775.4               | <b>GSGLQFTT-NH<sub>3</sub></b>      | 1185.5               | <b>NuVSLvG</b>                        | 1630.8 | <b>y<sub>13</sub>-NH<sub>3</sub></b> |
| 185.1               | <b>TT-H<sub>2</sub>O</b>                         | 510.2               | <b>a<sub>3</sub></b>                              | 776.4               | <b>y<sub>7</sub>-H<sub>2</sub>O</b> | 1186.1 <sup>+2</sup> | <b>MH<sup>+2</sup></b>                | 1634.7 | <b>b<sub>12</sub></b>                |
| 187.1               | <b>VS</b>                                        | 511.3 <sup>+2</sup> | <b>y<sub>10</sub>-H<sub>2</sub>O<sup>+2</sup></b> | 777.4               | <b>VSLvG-H<sub>2</sub>O</b>         | 1186.5               | <b>vGTGSGL QF</b>                     | 1647.8 | <b>y<sub>13</sub></b>                |
| 188.1               | <b>GTG-28</b>                                    | 511.8 <sup>+2</sup> | <b>y<sub>10</sub>-NH<sub>3</sub><sup>+2</sup></b> | 777.4               | <b>y<sub>7</sub>-NH<sub>3</sub></b> | 1192.6               | <b>VSLvGTGS GL-H<sub>2</sub>O</b>     | 1659.8 | <b>VSLvGTGSGLQFTT-28</b>             |
| 198.1               | <b>GTG-H<sub>2</sub>O</b>                        | 515.3               | <b>SGLQF-H<sub>2</sub>O</b>                       | 779.3               | <b>SLvGT-H<sub>2</sub>O</b>         | 1201.5               | <b>uVSLvGTG -28</b>                   | 1669.8 | <b>VSLvGTGSGLQFTT-H<sub>2</sub>O</b> |
| 201.1               | <b>SL</b>                                        | 516.2               | <b>SGLQF-NH<sub>3</sub></b>                       | 780.3               | <b>vGTGS-28</b>                     | 1210.6               | <b>VSLvGTGS GL</b>                    | 1670.8 | <b>VSLvGTGSGLQFTT-NH<sub>3</sub></b> |
| 202.1               | <b>GSG</b>                                       | 516.3               | <b>TGSGQLQ-28</b>                                 | 792.4               | <b>a<sub>6</sub>-NH<sub>3</sub></b> | 1211.5               | <b>uVSLvGTG -H<sub>2</sub>O</b>       | 1687.8 | <b>VSLvGTGSGLQFTT</b>                |
| 203.1               | <b>TT</b>                                        | 519.3               | <b>GLQFT-28</b>                                   | 792.4               | <b>TGSGQLQFT</b>                    | 1211.6               | <b>SLvGTGS GLQ-28</b>                 | 1700.8 | <b>NuVSLvGTGSGLQ-28</b>              |
| 214.2               | <b>LQ-28</b>                                     | 520.3 <sup>+2</sup> | <b>y<sub>10</sub><sup>+2</sup></b>                | 792.4               | <b>GSGLQFTT</b>                     | 1221.5               | <b>SLvGTGS GLQ-H<sub>2</sub>O</b>     | 1702.8 | <b>a<sub>13</sub>-NH<sub>3</sub></b> |
| 216.1               | <b>GTG</b>                                       | 521.2               | <b>b<sub>3</sub>-NH<sub>3</sub></b>               | 794.4               | <b>y<sub>7</sub></b>                | 1222.5               | <b>SLvGTGS GLQ-NH<sub>3</sub></b>     | 1710.8 | <b>NuVSLvGTGSGLQ-H<sub>2</sub>O</b>  |
| 217.1               | <b>a<sub>2</sub>-NH<sub>3</sub></b>              | 524.2               | <b>Lv-28</b>                                      | 795.4               | <b>VSLvG</b>                        | 1229.5               | <b>uVSLvGTG</b>                       | 1711.7 | <b>NuVSLvGTGSGLQ-NH<sub>3</sub></b>  |
| 218.1               | <b>TGS-28</b>                                    | 526.3               | <b>TGSGQLQ-H<sub>2</sub>O</b>                     | 797.3               | <b>SLvGT</b>                        | 1230.5               | <b>a<sub>7</sub>-NH<sub>3</sub></b>   | 1716.8 | <b>y<sub>14</sub>-H<sub>2</sub>O</b> |
| 221.1               | <b>FT-28</b>                                     | 527.2               | <b>TGSGQLQ-NH<sub>3</sub></b>                     | 798.3               | <b>vGTGS</b>                        | 1239.6               | <b>SLvGTGS GLQ</b>                    | 1717.8 | <b>y<sub>14</sub>-NH<sub>3</sub></b> |

|                     |                                                |                     |                                                 |                     |                                                 |        |                                  |        |                                   |
|---------------------|------------------------------------------------|---------------------|-------------------------------------------------|---------------------|-------------------------------------------------|--------|----------------------------------|--------|-----------------------------------|
| 225.1               | LQ-NH <sub>3</sub>                             | 529.3               | GLQFT-H <sub>2</sub> O                          | 809.4               | a <sub>6</sub>                                  | 1247.6 | a <sub>7</sub>                   | 1719.8 | a <sub>13</sub>                   |
| 228.1               | TGS-H <sub>2</sub> O                           | 530.3               | GLQFT-NH <sub>3</sub>                           | 815.4 <sup>+2</sup> | y <sub>13</sub> -H <sub>2</sub> O <sup>+2</sup> | 1257.5 | b <sub>7</sub> -H <sub>2</sub> O | 1728.8 | NuVSLvGTGSLQ                      |
| 230.1               | SGL-28                                         | 533.3               | SGLQF                                           | 815.9 <sup>+2</sup> | y <sub>13</sub> -NH <sub>3</sub> <sup>+2</sup>  | 1258.5 | b <sub>7</sub> -NH <sub>3</sub>  | 1729.8 | b <sub>13</sub> -H <sub>2</sub> O |
| 230.1               | y <sub>2</sub> -H <sub>2</sub> O               | 538.2               | b <sub>3</sub>                                  | 819.4               | b <sub>6</sub> -H <sub>2</sub> O                | 1258.6 | NuVSLvGT-28                      | 1730.7 | b <sub>13</sub> -NH <sub>3</sub>  |
| 231.1               | FT-H <sub>2</sub> O                            | 539.8 <sup>+2</sup> | y <sub>11</sub> -H <sub>2</sub> O <sup>+2</sup> | 820.4               | b <sub>6</sub> -NH <sub>3</sub>                 | 1259.6 | vGTGSLQFT-28                     | 1733.8 | uVSLvGTGSLQF-28                   |
| 231.1               | y <sub>2</sub> -NH <sub>3</sub>                | 540.3 <sup>+2</sup> | y <sub>11</sub> -NH <sub>3</sub> <sup>+2</sup>  | 821.4               | GTGSLQFT-28                                     | 1268.5 | NuVSLvGT-H <sub>2</sub> O        | 1734.8 | y <sub>14</sub>                   |
| 234.1               | a <sub>2</sub>                                 | 544.3               | TGSLQ                                           | 824.4 <sup>+2</sup> | y <sub>13</sub> <sup>+2</sup>                   | 1269.5 | NuVSLvGT-NH <sub>3</sub>         | 1743.8 | uVSLvGTGSLQF-H <sub>2</sub> O     |
| 239.6 <sup>+2</sup> | y <sub>4</sub> -H <sub>2</sub> O <sup>+2</sup> | 547.3               | GLQFT                                           | 826.4               | SLvGTG-28                                       | 1269.5 | vGTGSLQFT-H <sub>2</sub> O       | 1744.8 | uVSLvGTGSLQF-NH <sub>3</sub>      |
| 240.1 <sup>+2</sup> | y <sub>4</sub> -NH <sub>3</sub> <sup>+2</sup>  | 548.3               | uVSL-28                                         | 826.4               | LvGTGS-28                                       | 1270.5 | vGTGSLQFT-NH <sub>3</sub>        | 1747.8 | b <sub>13</sub>                   |
| 240.1               | SGL-H <sub>2</sub> O                           | 548.8 <sup>+2</sup> | y <sub>11</sub> <sup>+2</sup>                   | 831.4               | GTGSLQFT-H <sub>2</sub> O                       | 1271.6 | LvGTGSLQF-28                     | 1761.8 | uVSLvGTGSLQF                      |
| 242.1               | LQ                                             | 549.3               | NuVS-28                                         | 832.4               | GTGSLQFT-NH <sub>3</sub>                        | 1275.5 | b <sub>7</sub>                   | 1815.9 | y <sub>15</sub> -H <sub>2</sub> O |
| 245.1               | b <sub>2</sub> -NH <sub>3</sub>                | 552.2               | Lv                                              | 836.4               | SLvGTG-H <sub>2</sub> O                         | 1281.6 | LvGTGSLQF-H <sub>2</sub> O       | 1816.9 | y <sub>15</sub> -NH <sub>3</sub>  |
| 246.1               | TGS                                            | 558.3               | uVSL-H <sub>2</sub> O                           | 836.4               | LvGTGS-H <sub>2</sub> O                         | 1282.6 | LvGTGSLQF-NH <sub>3</sub>        | 1830.8 | a <sub>14</sub> -NH <sub>3</sub>  |
| 248.1               | QF-28                                          | 559.2               | NuVS-H <sub>2</sub> O                           | 837.4               | b <sub>6</sub>                                  | 1286.5 | NuVSLvGT                         | 1833.9 | y <sub>15</sub>                   |
| 248.2               | y <sub>2</sub>                                 | 560.2               | NuVS-NH <sub>3</sub>                            | 849.4               | GTGSLQFT                                        | 1287.5 | a <sub>8</sub> -NH <sub>3</sub>  | 1834.8 | uVSLvGTGSLQFT-28                  |
| 248.6 <sup>+2</sup> | y <sub>4</sub> <sup>+2</sup>                   | 562.3               | GSLQF-28                                        | 854.4               | SLvGTG                                          | 1287.6 | vGTGSLQFT                        | 1844.8 | uVSLvGTGSLQFT-H <sub>2</sub> O    |
| 249.1               | FT                                             | 563.3               | LQFTT-28                                        | 854.4               | LvGTGS                                          | 1288.6 | uVSLvGTGS-28                     | 1845.8 | uVSLvGTGSLQFT-NH <sub>3</sub>     |
| 258.1               | SGL                                            | 569.2               | vGT-28                                          | 858.9 <sup>+2</sup> | y <sub>14</sub> -H <sub>2</sub> O <sup>+2</sup> | 1298.5 | uVSLvGTGS-H <sub>2</sub> O       | 1847.8 | a <sub>14</sub>                   |
| 259.1               | QF-NH <sub>3</sub>                             | 572.3               | GSLQF-H <sub>2</sub> O                          | 859.4 <sup>+2</sup> | y <sub>14</sub> -NH <sub>3</sub> <sup>+2</sup>  | 1299.6 | LvGTGSLQF                        | 1847.8 | NuVSLvGTGSLQF-28                  |
| 262.1               | b <sub>2</sub>                                 | 573.3               | GSLQF-NH <sub>3</sub>                           | 863.5               | y <sub>8</sub> -H <sub>2</sub> O                | 1304.6 | a <sub>8</sub>                   | 1857.8 | NuVSLvGTGSLQF-H <sub>2</sub> O    |

|                     |                               |       |                              |                     |                                  |        |                                    |        |                                      |
|---------------------|-------------------------------|-------|------------------------------|---------------------|----------------------------------|--------|------------------------------------|--------|--------------------------------------|
| 271.2               | <b>GLQ-28</b>                 | 573.3 | <b>GTGSLQ-28</b>             | 864.4               | $y_8\text{-NH}_3$                | 1310.6 | <b>VSLvGTGS GLQ-28</b>             | 1857.8 | $b_{14}\text{-H}_2\text{O}$          |
| 272.2               | <b>VSL-28</b>                 | 573.3 | <b>LQFTT-H<sub>2</sub>O</b>  | 865.4               | <b>TGSLQFTT-28</b>               | 1314.6 | $b_8\text{-H}_2\text{O}$           | 1858.8 | $b_{14}\text{-NH}_3$                 |
| 275.1               | <b>TGSG-28</b>                | 574.3 | <b>LQFTT-NH<sub>3</sub></b>  | 867.9 <sup>+2</sup> | $y_{14}^{+2}$                    | 1315.5 | $b_8\text{-NH}_3$                  | 1858.8 | <b>NuVSLvGTGSLQF-NH<sub>3</sub></b>  |
| 275.1               | <b>GTGS-28</b>                | 576.3 | <b>uVSL</b>                  | 868.4               | <b>VSLvGT-28</b>                 | 1315.6 | <b>NuVSLvGT G-28</b>               | 1862.8 | <b>uVSLvGTGSLQFT</b>                 |
| 276.1               | <b>QF</b>                     | 577.2 | <b>NuVS</b>                  | 875.4               | <b>TGSLQFTT-H<sub>2</sub>O</b>   | 1316.6 | <b>uVSLvGTGS S</b>                 | 1875.8 | <b>NuVSLvGTGSLQF</b>                 |
| 282.1               | <b>GLQ-NH<sub>3</sub></b>     | 579.2 | <b>vGT-H<sub>2</sub>O</b>    | 876.4               | <b>TGSLQFTT-NH<sub>3</sub></b>   | 1320.6 | <b>VSLvGTGS GLQ-H<sub>2</sub>O</b> | 1875.8 | $b_{14}$                             |
| 282.2               | <b>VSL-H<sub>2</sub>O</b>     | 581.3 | <b>LvG-28</b>                | 878.4               | <b>VSLvGT-H<sub>2</sub>O</b>     | 1321.6 | <b>VSLvGTGS GLQ-NH<sub>3</sub></b> | 1935.9 | <b>uVSLvGTGSLQFTT-28</b>             |
| 285.1               | <b>TGSG-H<sub>2</sub>O</b>    | 583.3 | <b>GTGSLQ-H<sub>2</sub>O</b> | 881.5               | $y_8$                            | 1325.6 | <b>NuVSLvGT G-H<sub>2</sub>O</b>   | 1945.9 | <b>uVSLvGTGSLQFTT-H<sub>2</sub>O</b> |
| 285.1               | <b>GTGS-H<sub>2</sub>O</b>    | 584.3 | <b>GTGSLQ-NH<sub>3</sub></b> | 883.4               | <b>vGTGSL-28</b>                 | 1326.5 | <b>NuVSLvGT G-NH<sub>3</sub></b>   | 1946.9 | <b>uVSLvGTGSLQFTT-NH<sub>3</sub></b> |
| 287.2               | <b>GSGL-28</b>                | 590.3 | <b>GSGLQF</b>                | 883.4               | <b>LvGTGSG-28</b>                | 1332.6 | $b_8$                              | 1948.9 | <b>NuVSLvGTGSLQFT-28</b>             |
| 297.2               | <b>GSGL-H<sub>2</sub>O</b>    | 591.3 | <b>LQFTT</b>                 | 893.4               | <b>vGTGSL-H<sub>2</sub>O</b>     | 1338.6 | <b>VSLvGTGS GLQ</b>                | 1958.9 | <b>NuVSLvGTGSLQFT-H<sub>2</sub>O</b> |
| 299.2               | <b>GLQ</b>                    | 592.3 | $a_4\text{-NH}_3$            | 893.4               | <b>LvGTGSG-H<sub>2</sub>O</b>    | 1343.6 | <b>NuVSLvGT G</b>                  | 1959.9 | <b>NuVSLvGTGSLQFT-NH<sub>3</sub></b> |
| 300.2               | <b>VSL</b>                    | 597.2 | <b>vGT</b>                   | 893.4               | <b>TGSLQFTT</b>                  | 1345.6 | <b>uVSLvGTGS SG-28</b>             | 1963.9 | <b>uVSLvGTGSLQFTT</b>                |
| 303.1               | <b>TGSG</b>                   | 601.3 | <b>GTGSLQ</b>                | 896.4               | <b>VSLvGT</b>                    | 1355.6 | <b>uVSLvGTGS SG-H<sub>2</sub>O</b> | 1976.9 | <b>NuVSLvGTGSLQFT</b>                |
| 303.1               | <b>GTGS</b>                   | 606.3 | <b>SGLQFT-28</b>             | 908.5 <sup>+2</sup> | $y_{15}\text{-H}_2\text{O}^{+2}$ | 1358.6 | <b>SLvGTGS GLQF-28</b>             | 1977.9 | $a_{15}\text{-NH}_3$                 |
| 303.7 <sup>+2</sup> | $y_5\text{-H}_2\text{O}^{+2}$ | 606.3 | $y_5\text{-H}_2\text{O}$     | 908.9 <sup>+2</sup> | $y_{15}\text{-NH}_3^{+2}$        | 1360.6 | <b>vGTGSL QFTT-28</b>              | 1994.9 | $a_{15}$                             |
| 304.2 <sup>+2</sup> | $y_5\text{-NH}_3^{+2}$        | 607.3 | $y_5\text{-NH}_3$            | 911.4               | <b>vGTGSL</b>                    | 1368.6 | <b>SLvGTGS GLQF-H<sub>2</sub>O</b> | 2004.9 | $b_{15}\text{-H}_2\text{O}$          |
| 312.7 <sup>+2</sup> | $y_5^{+2}$                    | 609.3 | <b>LvG</b>                   | 911.4               | <b>LvGTGSG</b>                   | 1369.6 | <b>SLvGTGS GLQF-NH<sub>3</sub></b> | 2005.9 | $b_{15}\text{-NH}_3$                 |

|                     |                                                  |       |                                     |                     |                                      |        |                                        |        |                                             |
|---------------------|--------------------------------------------------|-------|-------------------------------------|---------------------|--------------------------------------|--------|----------------------------------------|--------|---------------------------------------------|
| 315.2               | <b>GSGL</b>                                      | 609.3 | <b>a<sub>4</sub></b>                | 913.4               | <b>SLvGTGS-28</b>                    | 1370.6 | <b>vGTGSGL<br/>QFTT-H<sub>2</sub>O</b> | 2022.9 | <b>b<sub>15</sub></b>                       |
| 322.2               | <b>FTT-28</b>                                    | 611.3 | <b>SLv-28</b>                       | 917.5 <sup>+2</sup> | <b>y<sub>15</sub><sup>+2</sup></b>   | 1371.6 | <b>vGTGSGL<br/>QFTT-NH<sub>3</sub></b> | 2049.9 | <b>NuVSLvGTGSGLQFTT-<br/>28</b>             |
| 331.2               | <b>y<sub>3</sub>-H<sub>2</sub>O</b>              | 616.3 | <b>SGLQFT-<br/>H<sub>2</sub>O</b>   | 920.5               | <b>y<sub>9</sub>-H<sub>2</sub>O</b>  | 1372.6 | <b>LvGTGSGL<br/>QFT-28</b>             | 2059.9 | <b>NuVSLvGTGSGLQFTT-<br/>H<sub>2</sub>O</b> |
| 332.2               | <b>GTGSG-<br/>28</b>                             | 617.3 | <b>SGLQFT-<br/>NH<sub>3</sub></b>   | 921.5               | <b>y<sub>9</sub>-NH<sub>3</sub></b>  | 1373.6 | <b>uVSLvGTG<br/>SG</b>                 | 2060.9 | <b>NuVSLvGTGSGLQFTT-<br/>NH<sub>3</sub></b> |
| 332.2               | <b>FTT-<br/>H<sub>2</sub>O</b>                   | 620.3 | <b>b<sub>4</sub>-NH<sub>3</sub></b> | 922.5               | <b>GTGSLQFTT-<br/>28</b>             | 1382.6 | <b>LvGTGSGL<br/>QFT-H<sub>2</sub>O</b> | 2077.9 | <b>NuVSLvGTGSGLQFTT</b>                     |
| 332.2               | <b>y<sub>3</sub>-NH<sub>3</sub></b>              | 620.3 | <b>GLQFTT-<br/>28</b>               | 923.4               | <b>SLvGTGS-H<sub>2</sub>O</b>        | 1383.6 | <b>LvGTGSGL<br/>QFT-NH<sub>3</sub></b> | 2078.9 | <b>a<sub>16</sub>-NH<sub>3</sub></b>        |
| 342.1               | <b>GTGSG-<br/>H<sub>2</sub>O</b>                 | 621.3 | <b>SLv-H<sub>2</sub>O</b>           | 925.4               | <b>VSLvGTG-28</b>                    | 1386.6 | <b>SLvGTGS<br/>GLQF</b>                | 2092.0 | <b>y<sub>16</sub>-H<sub>2</sub>O</b>        |
| 348.2               | <b>uV-28</b>                                     | 624.3 | <b>y<sub>5</sub></b>                | 932.4               | <b>GTGSLQFTT-<br/>H<sub>2</sub>O</b> | 1388.6 | <b>a<sub>9</sub>-NH<sub>3</sub></b>    | 2093.0 | <b>y<sub>16</sub>-NH<sub>3</sub></b>        |
| 349.2               | <b>QFT-28</b>                                    | 626.3 | <b>vGTG-28</b>                      | 933.4               | <b>GTGSLQFTT-<br/>NH<sub>3</sub></b> | 1388.6 | <b>vGTGSGL<br/>QFTT</b>                | 2096.0 | <b>a<sub>16</sub></b>                       |
| 349.2               | <b>y<sub>3</sub></b>                             | 630.3 | <b>GLQFTT-<br/>H<sub>2</sub>O</b>   | 935.4               | <b>VSLvGTG-H<sub>2</sub>O</b>        | 1400.6 | <b>LvGTGSGL<br/>QFT</b>                | 2105.9 | <b>b<sub>16</sub>-H<sub>2</sub>O</b>        |
| 350.2               | <b>FTT</b>                                       | 631.3 | <b>GLQFTT-<br/>NH<sub>3</sub></b>   | 938.5               | <b>y<sub>9</sub></b>                 | 1402.6 | <b>NuVSLvGT<br/>GS-28</b>              | 2106.9 | <b>b<sub>16</sub>-NH<sub>3</sub></b>        |
| 358.2               | <b>SGLQ-<br/>28</b>                              | 634.3 | <b>SGLQFT</b>                       | 941.4               | <b>SLvGTGS</b>                       | 1405.6 | <b>a<sub>9</sub></b>                   | 2110.0 | <b>y<sub>16</sub></b>                       |
| 359.2               | <b>QFT-<br/>H<sub>2</sub>O</b>                   | 636.2 | <b>vGTG-H<sub>2</sub>O</b>          | 950.5               | <b>GTGSLQFTT</b>                     | 1412.6 | <b>NuVSLvGT<br/>GS-H<sub>2</sub>O</b>  | 2124.0 | <b>b<sub>16</sub></b>                       |
| 360.2               | <b>GTGSG</b>                                     | 637.3 | <b>b<sub>4</sub></b>                | 953.4               | <b>VSLvGTG</b>                       | 1413.6 | <b>NuVSLvGT<br/>GS-NH<sub>3</sub></b>  | 2180.0 | <b>a<sub>17</sub>-NH<sub>3</sub></b>        |
| 360.2               | <b>QFT-<br/>NH<sub>3</sub></b>                   | 639.3 | <b>SLv</b>                          | 970.4               | <b>SLvGTGSG-28</b>                   | 1415.6 | <b>b<sub>9</sub>-H<sub>2</sub>O</b>    | 2197.0 | <b>a<sub>17</sub></b>                       |
| 360.2 <sup>+2</sup> | <b>y<sub>6</sub>-H<sub>2</sub>O<sup>+2</sup></b> | 648.3 | <b>GLQFTT</b>                       | 980.4               | <b>SLvGTGSG-<br/>H<sub>2</sub>O</b>  | 1416.6 | <b>b<sub>9</sub>-NH<sub>3</sub></b>    | 2206.0 | <b>y<sub>17</sub>-H<sub>2</sub>O</b>        |
| 360.7 <sup>+2</sup> | <b>y<sub>6</sub>-NH<sub>3</sub><sup>+2</sup></b> | 654.2 | <b>vGTG</b>                         | 986.4               | <b>uVSLv-28</b>                      | 1430.6 | <b>NuVSLvGT<br/>GS</b>                 | 2207.0 | <b>b<sub>17</sub>-H<sub>2</sub>O</b>        |
| 361.2               | <b>LQF-28</b>                                    | 662.3 | <b>NuVSL-28</b>                     | 996.4               | <b>uVSLv-H<sub>2</sub>O</b>          | 1433.6 | <b>b<sub>9</sub></b>                   | 2207.0 | <b>y<sub>17</sub>-NH<sub>3</sub></b>        |
| 363.2               | <b>Nu-28</b>                                     | 663.3 | <b>GSLQFT-<br/>28</b>               | 996.5               | <b>LvGTGSGL-28</b>                   | 1445.6 | <b>a<sub>10</sub>-NH<sub>3</sub></b>   | 2208.0 | <b>b<sub>17</sub>-NH<sub>3</sub></b>        |
| 368.2               | <b>SGLQ-<br/>H<sub>2</sub>O</b>                  | 663.3 | <b>TGSLQF-<br/>28</b>               | 998.4               | <b>SLvGTGSG</b>                      | 1457.7 | <b>VSLvGTGS<br/>GLQF-28</b>            | 2224.0 | <b>y<sub>17</sub></b>                       |

|                     |                                   |       |                               |        |                                      |        |                                     |        |                          |
|---------------------|-----------------------------------|-------|-------------------------------|--------|--------------------------------------|--------|-------------------------------------|--------|--------------------------|
| 369.2               | <b>SGLQ-NH<sub>3</sub></b>        | 668.3 | <b>SLvG-28</b>                | 1006.5 | <b>LvGTGSGL-H<sub>2</sub>O</b>       | 1458.7 | <b>uVSLvGTG SGL-28</b>              | 2225.0 | <b>b<sub>17</sub></b>    |
| 369.2 <sup>+2</sup> | <b>y<sub>6</sub><sup>+2</sup></b> | 672.3 | <b>NuVSL-H<sub>2</sub>O</b>   | 1011.4 | <b>vGTGSGLQ-28</b>                   | 1459.6 | <b>NuVSLvGT GSG-28</b>              | 2353.1 | <b>MH-H<sub>2</sub>O</b> |
| 372.2               | <b>LQF-NH<sub>3</sub></b>         | 673.3 | <b>NuVSL-NH<sub>3</sub></b>   | 1012.5 | <b>VSLvGTGS-28</b>                   | 1459.7 | <b>SLvGTGS GLQFT-28</b>             | 2354.1 | <b>MH-NH<sub>3</sub></b> |
| 374.1               | <b>Nu-NH<sub>3</sub></b>          | 673.3 | <b>TGSQLQF-H<sub>2</sub>O</b> | 1014.4 | <b>uVSLv</b>                         | 1462.6 | <b>a<sub>10</sub></b>               | 2371.1 | <b>MH</b>                |
| 376.2               | <b>uV</b>                         | 673.3 | <b>GSQLQFT-H<sub>2</sub>O</b> | 1021.4 | <b>vGTGSGLQ-H<sub>2</sub>O</b>       | 1467.7 | <b>VSLvGTGS GLQF-H<sub>2</sub>O</b> |        |                          |
| 377.2               | <b>QFT</b>                        | 674.3 | <b>TGSQLQF-NH<sub>3</sub></b> | 1021.5 | <b>y<sub>10</sub>-H<sub>2</sub>O</b> | 1468.7 | <b>uVSLvGTG SGL-H<sub>2</sub>O</b>  |        |                          |
| 386.2               | <b>SGLQ</b>                       | 674.3 | <b>GSQLQFT-NH<sub>3</sub></b> | 1022.4 | <b>vGTGSGLQ-NH<sub>3</sub></b>       | 1468.7 | <b>VSLvGTGS GLQF-NH<sub>3</sub></b> |        |                          |
| 388.2               | <b>TGSQL-28</b>                   | 678.3 | <b>SLvG-H<sub>2</sub>O</b>    | 1022.5 | <b>VSLvGTGS-H<sub>2</sub>O</b>       | 1469.6 | <b>NuVSLvGT GSG-H<sub>2</sub>O</b>  |        |                          |

## FEGTLNISGK

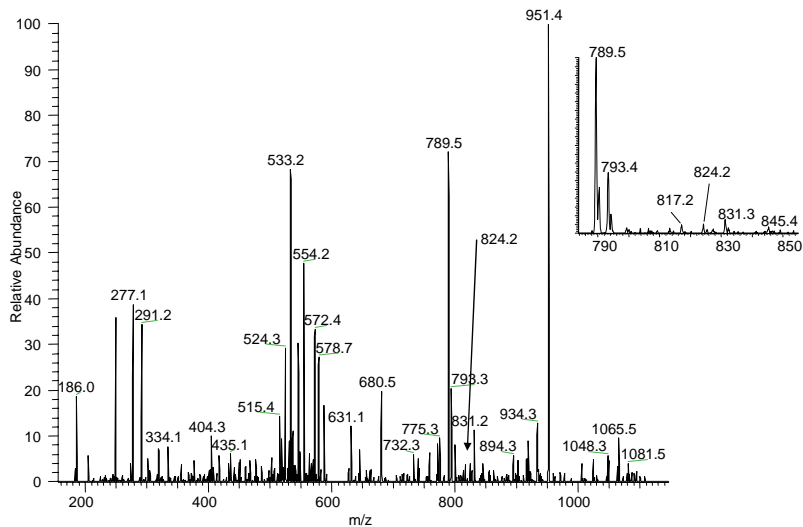

|                    |                                                              |                     |                                   |                     |                                                 |                     |                                       |       |                                     |
|--------------------|--------------------------------------------------------------|---------------------|-----------------------------------|---------------------|-------------------------------------------------|---------------------|---------------------------------------|-------|-------------------------------------|
| 60.0               | <b>S</b>                                                     | 201.1               | <b>IS</b>                         | 397.2 <sup>+2</sup> | <b>y<sub>6</sub><sup>+2</sup></b>               | 586.3               | <b>TLuI-H<sub>2</sub>O</b>            | 796.4 | <b>a<sub>6</sub></b>                |
| 65.6 <sup>+2</sup> | <b>y<sub>1</sub><sup>-</sup>-NH<sub>3</sub><sup>+2</sup></b> | 202.6 <sup>+2</sup> | <b>y<sub>4</sub><sup>+2</sup></b> | 401.2               | <b>EGTL</b>                                     | 590.3               | <b>LuIS</b>                           | 805.4 | <b>GTLuISG</b>                      |
| 74.1               | <b>T</b>                                                     | 204.1               | <b>y<sub>2</sub></b>              | 404.3               | <b>y<sub>4</sub></b>                            | 604.3               | <b>TLuI</b>                           | 806.4 | <b>b<sub>6</sub>-H<sub>2</sub>O</b> |
| 74.1 <sup>+2</sup> | <b>y<sub>1</sub><sup>+2</sup></b>                            | 215.1               | <b>TL</b>                         | 407.2               | <b>a<sub>4</sub></b>                            | 605.3 <sup>+2</sup> | <b>MH-H<sub>2</sub>O<sup>+2</sup></b> | 824.4 | <b>b<sub>6</sub></b>                |
| 84.1               | <b>K</b>                                                     | 230.1               | <b>ISG-28</b>                     | 417.2               | <b>b<sub>4</sub><sup>-</sup>-H<sub>2</sub>O</b> | 605.8 <sup>+2</sup> | <b>MH-NH<sub>3</sub><sup>+2</sup></b> | 849.4 | <b>EGTLuIS-28</b>                   |

|                        |                                                            |                     |                                                            |                     |                                                            |                     |                                  |        |                                  |
|------------------------|------------------------------------------------------------|---------------------|------------------------------------------------------------|---------------------|------------------------------------------------------------|---------------------|----------------------------------|--------|----------------------------------|
| 86.1                   | L                                                          | 240.1               | ISG-H <sub>2</sub> O                                       | 435.2               | b <sub>4</sub>                                             | 614.3 <sup>+2</sup> | MH <sup>+2</sup>                 | 859.4  | EGTLuIS-H <sub>2</sub> O         |
| 86.1                   | I                                                          | 244.2               | GTL-28                                                     | 438.7 <sup>+2</sup> | y <sub>7</sub> <sup>-</sup> H <sub>2</sub> O <sup>+2</sup> | 619.3               | LulSG-28                         | 876.5  | y <sub>7</sub> -H <sub>2</sub> O |
| 94.1 <sup>+2</sup>     | y <sub>2</sub> <sup>-</sup> NH <sub>3</sub> <sup>+2</sup>  | 249.1               | a <sub>2</sub>                                             | 439.2 <sup>+2</sup> | y <sub>7</sub> <sup>-</sup> NH <sub>3</sub> <sup>+2</sup>  | 629.3               | LulSG-H <sub>2</sub> O           | 877.4  | EGTLuIS                          |
| 101.1                  | K                                                          | 254.1               | GTL-H <sub>2</sub> O                                       | 447.7 <sup>+2</sup> | y <sub>7</sub> <sup>+2</sup>                               | 633.3               | GTLul-28                         | 877.5  | y <sub>7</sub> -NH <sub>3</sub>  |
| 102.1                  | E                                                          | 258.1               | ISG                                                        | 449.2               | ulS-28                                                     | 643.3               | GTLul-H <sub>2</sub> O           | 894.5  | y <sub>7</sub>                   |
| 102.6 <sup>+2</sup>    | y <sub>2</sub> <sup>+2</sup>                               | 259.1               | b <sub>2</sub> <sup>-</sup> H <sub>2</sub> O               | 459.2               | ulS-H <sub>2</sub> O                                       | 647.3               | LulSG                            | 906.4  | EGTLulSG-28                      |
| 117.1                  | SG-28                                                      | 260.1               | EGT-28                                                     | 463.2               | TLu-28                                                     | 649.3               | EGTLu-28                         | 909.5  | a <sub>7</sub>                   |
| 120.1                  | F                                                          | 270.1               | EGT-H <sub>2</sub> O                                       | 467.3 <sup>+2</sup> | y <sub>8</sub> <sup>-</sup> H <sub>2</sub> O <sup>+2</sup> | 659.3               | EGTLu-H <sub>2</sub> O           | 916.4  | EGTLulSG-H <sub>2</sub> O        |
| 126.1                  | K                                                          | 272.2               | GTL                                                        | 467.7 <sup>+2</sup> | y <sub>8</sub> <sup>-</sup> NH <sub>3</sub> <sup>+2</sup>  | 661.3               | GTLul                            | 919.4  | b <sub>7</sub> -H <sub>2</sub> O |
| 127.1                  | SG-H <sub>2</sub> O                                        | 273.2               | y <sub>3</sub> <sup>-</sup> H <sub>2</sub> O               | 473.2               | TLu-H <sub>2</sub> O                                       | 662.3               | y <sub>5</sub> -H <sub>2</sub> O | 933.5  | y <sub>8</sub> -H <sub>2</sub> O |
| 129.1                  | K                                                          | 274.1               | y <sub>3</sub> -NH <sub>3</sub>                            | 475.3               | Lul-28                                                     | 663.3               | y <sub>5</sub> -NH <sub>3</sub>  | 934.4  | EGTLulSG                         |
| 130.1                  | y <sub>1</sub> <sup>-</sup> NH <sub>3</sub>                | 277.1               | b <sub>2</sub>                                             | 476.3 <sup>+2</sup> | y <sub>8</sub> <sup>+2</sup>                               | 663.4               | TLulS-28                         | 934.5  | y <sub>8</sub> -NH <sub>3</sub>  |
| 131.1                  | GT-28                                                      | 288.1               | EGT                                                        | 477.2               | ulS                                                        | 673.3               | TLulS-H <sub>2</sub> O           | 937.5  | b <sub>7</sub>                   |
| 137.0815 <sup>+2</sup> | y <sub>3</sub> <sup>-</sup> H <sub>2</sub> O <sup>+2</sup> | 291.2               | y <sub>3</sub>                                             | 491.2               | TLu                                                        | 677.3               | EGTLu                            | 951.5  | y <sub>8</sub>                   |
| 137.6 <sup>+2</sup>    | y <sub>3</sub> <sup>-</sup> NH <sub>3</sub> <sup>+2</sup>  | 306.1               | a <sub>3</sub>                                             | 503.3               | Lul                                                        | 680.3               | y <sub>5</sub>                   | 996.5  | a <sub>8</sub>                   |
| 141.1                  | GT-H <sub>2</sub> O                                        | 316.1               | b <sub>3</sub> <sup>-</sup> H <sub>2</sub> O               | 506.2               | ulSG-28                                                    | 691.4               | TLulS                            | 1006.5 | b <sub>8</sub> -H <sub>2</sub> O |
| 145.1                  | SG                                                         | 331.7 <sup>+2</sup> | y <sub>5</sub> <sup>-</sup> H <sub>2</sub> O <sup>+2</sup> | 516.2               | ulSG-H <sub>2</sub> O                                      | 720.4               | TLulSG-28                        | 1024.5 | b <sub>8</sub>                   |
| 146.1 <sup>+2</sup>    | y <sub>3</sub> <sup>+2</sup>                               | 332.2 <sup>+2</sup> | y <sub>5</sub> <sup>-</sup> NH <sub>3</sub> <sup>+2</sup>  | 520.3               | GTLu-28                                                    | 720.4               | GTLulS-28                        | 1053.5 | a <sub>9</sub>                   |
| 147.1                  | y <sub>1</sub>                                             | 334.1               | b <sub>3</sub>                                             | 520.3               | a <sub>5</sub>                                             | 730.4               | TLulSG-H <sub>2</sub> O          | 1062.5 | y <sub>9</sub> -H <sub>2</sub> O |
| 159.1                  | EG-28                                                      | 340.7 <sup>+2</sup> | y <sub>5</sub> <sup>+2</sup>                               | 530.2               | GTLu-H <sub>2</sub> O                                      | 730.4               | GTLulS-H <sub>2</sub> O          | 1063.5 | b <sub>9</sub> -H <sub>2</sub> O |
| 159.1                  | GT                                                         | 362.2               | ul-28                                                      | 530.3               | b <sub>5</sub> <sup>-</sup> H <sub>2</sub> O               | 748.4               | TLulSG                           | 1063.5 | y <sub>9</sub> -NH <sub>3</sub>  |
| 169.1                  | EG-H <sub>2</sub> O                                        | 362.2               | Lu-28                                                      | 531.8               | y <sub>9</sub> <sup>-</sup> H <sub>2</sub> O <sup>+2</sup> | 748.4               | GTLulS                           | 1080.5 | y <sub>9</sub>                   |
| 173.1                  | IS-28                                                      | 373.2               | EGTL-28                                                    | 532.3 <sup>+2</sup> | y <sub>9</sub> <sup>-</sup> NH <sub>3</sub> <sup>+2</sup>  | 762.4               | EGTLul-28                        | 1081.5 | b <sub>9</sub>                   |
| 183.1                  | IS-H <sub>2</sub> O                                        | 383.2               | EGTL-H <sub>2</sub> O                                      | 534.2               | ulSG                                                       | 772.4               | EGTLul-H <sub>2</sub> O          | 1209.6 | MH-H <sub>2</sub> O              |
| 187.1                  | EG                                                         | 386.2               | y <sub>4</sub> <sup>-</sup> H <sub>2</sub> O               | 540.8 <sup>+2</sup> | y <sub>9</sub> <sup>+2</sup>                               | 775.4               | y <sub>6</sub> -H <sub>2</sub> O | 1210.6 | MH-NH <sub>3</sub>               |
| 187.1                  | y <sub>2</sub> <sup>-</sup> NH <sub>3</sub>                | 387.2               | y <sub>4</sub> -NH <sub>3</sub>                            | 548.3               | GTLu                                                       | 776.4               | y <sub>6</sub> -NH <sub>3</sub>  | 1227.6 | MH                               |
| 187.1                  | TL-28                                                      | 388.2 <sup>+2</sup> | y <sub>6</sub> <sup>-</sup> H <sub>2</sub> O <sup>+2</sup> | 548.3               | b <sub>5</sub>                                             | 777.4               | GTLulSG-28                       |        |                                  |

|                     |                                                                  |                     |                                                                  |       |                                 |       |                                    |
|---------------------|------------------------------------------------------------------|---------------------|------------------------------------------------------------------|-------|---------------------------------|-------|------------------------------------|
| 193.6 <sup>+2</sup> | <b>y<sub>4</sub><sup>-</sup><br/>H<sub>2</sub>O<sup>+2</sup></b> | 388.7 <sup>+2</sup> | <b>y<sub>6</sub><sup>-</sup><br/>NH<sub>3</sub><sup>+2</sup></b> | 562.3 | <b>LvIS-<br/>28</b>             | 787.4 | <b>GTLvISG-<br/>H<sub>2</sub>O</b> |
| 194.1 <sup>+2</sup> | <b>y<sub>4</sub><sup>-</sup><br/>NH<sub>3</sub><sup>+2</sup></b> | 390.2               | <b>Lu</b>                                                        | 572.3 | <b>LvIS-<br/>H<sub>2</sub>O</b> | 790.4 | <b>EGTLvI</b>                      |
| 197.1               | <b>TL-<br/>H<sub>2</sub>O</b>                                    | 390.2               | <b>vl</b>                                                        | 576.3 | <b>TLvI-<br/>28</b>             | 793.4 | <b>y<sub>6</sub></b>               |

## FEGTLNISGK

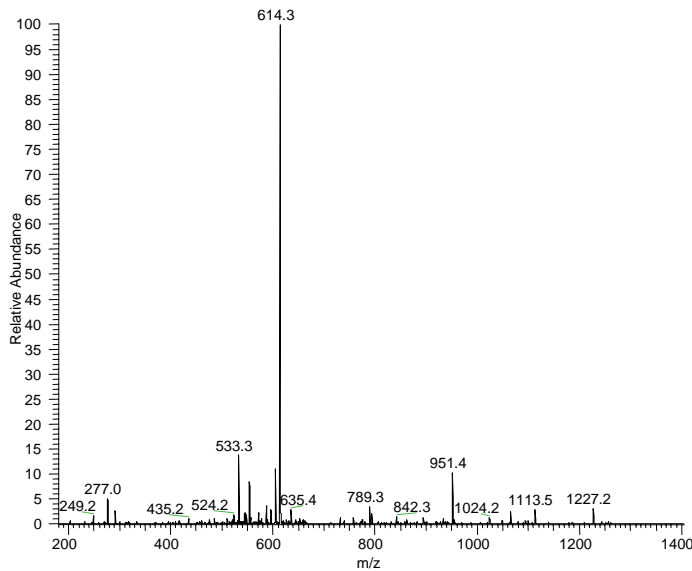

|                     |                                                                  |                     |                                     |                     |                                                                  |       |                                  |        |                                     |
|---------------------|------------------------------------------------------------------|---------------------|-------------------------------------|---------------------|------------------------------------------------------------------|-------|----------------------------------|--------|-------------------------------------|
| 60.0                | <b>S</b>                                                         | 201.1               | <b>IS</b>                           | 469.7 <sup>+2</sup> | <b>y<sub>6</sub><sup>-</sup><br/>NH<sub>3</sub><sup>+2</sup></b> | 724.4 | <b>LvIS-28</b>                   | 958.4  | <b>a<sub>6</sub></b>                |
| 65.6 <sup>+2</sup>  | <b>y<sub>1</sub><sup>-</sup><br/>NH<sub>3</sub><sup>+2</sup></b> | 202.6 <sup>+2</sup> | <b>y<sub>4</sub><sup>+2</sup></b>   | 478.3 <sup>+2</sup> | <b>y<sub>6</sub><sup>+2</sup></b>                                | 734.3 | <b>LvIS-H<sub>2</sub>O</b>       | 967.4  | <b>GTLvISG</b>                      |
| 74.1                | <b>T</b>                                                         | 204.1               | <b>y<sub>2</sub></b>                | 519.7 <sup>+2</sup> | <b>y<sub>7</sub><sup>-</sup><br/>H<sub>2</sub>O<sup>+2</sup></b> | 738.4 | <b>TLvI-28</b>                   | 968.4  | <b>b<sub>6</sub>-H<sub>2</sub>O</b> |
| 74.1 <sup>+2</sup>  | <b>y<sub>1</sub><sup>+2</sup></b>                                | 215.1               | <b>TL</b>                           | 520.3 <sup>+2</sup> | <b>y<sub>7</sub><sup>-</sup><br/>NH<sub>3</sub><sup>+2</sup></b> | 748.4 | <b>TLvI-H<sub>2</sub>O</b>       | 986.4  | <b>b<sub>6</sub></b>                |
| 84.1                | <b>K</b>                                                         | 230.1               | <b>ISG-28</b>                       | 520.3               | <b>a<sub>5</sub></b>                                             | 752.4 | <b>LvIS</b>                      | 1011.5 | <b>EGTLvIS-<br/>28</b>              |
| 86.1                | <b>L</b>                                                         | 240.1               | <b>ISG-<br/>H<sub>2</sub>O</b>      | 524.2               | <b>vl-28</b>                                                     | 766.4 | <b>TLvI</b>                      | 1021.5 | <b>EGTLvIS-<br/>H<sub>2</sub>O</b>  |
| 86.1                | <b>I</b>                                                         | 244.2               | <b>GTL-<br/>28</b>                  | 524.2               | <b>Lv-28</b>                                                     | 781.4 | <b>LvISG-28</b>                  | 1038.5 | <b>y<sub>7</sub>-H<sub>2</sub>O</b> |
| 94.1 <sup>+2</sup>  | <b>y<sub>2</sub><sup>-</sup><br/>NH<sub>3</sub><sup>+2</sup></b> | 249.1               | <b>a<sub>2</sub></b>                | 528.8 <sup>+2</sup> | <b>y<sub>7</sub><sup>+2</sup></b>                                | 791.4 | <b>LvISG-<br/>H<sub>2</sub>O</b> | 1039.5 | <b>EGTLvIS</b>                      |
| 101.1               | <b>K</b>                                                         | 254.1               | <b>GTL-<br/>H<sub>2</sub>O</b>      | 530.3               | <b>b<sub>5</sub><sup>-</sup><br/>H<sub>2</sub>O</b>              | 795.4 | <b>GTLvI-28</b>                  | 1039.5 | <b>y<sub>7</sub>-NH<sub>3</sub></b> |
| 102.1               | <b>E</b>                                                         | 258.1               | <b>ISG</b>                          | 548.3               | <b>b<sub>5</sub></b>                                             | 805.4 | <b>GTLvI-<br/>H<sub>2</sub>O</b> | 1056.5 | <b>y<sub>7</sub></b>                |
| 102.6 <sup>+2</sup> | <b>y<sub>2</sub><sup>+2</sup></b>                                | 259.1               | <b>b<sub>2</sub>-H<sub>2</sub>O</b> | 548.3 <sup>+2</sup> | <b>y<sub>8</sub><sup>-</sup><br/>H<sub>2</sub>O<sup>+2</sup></b> | 809.4 | <b>LvISG</b>                     | 1068.5 | <b>EGTLvISG-<br/>28</b>             |
| 117.1               | <b>SG-28</b>                                                     | 260.1               | <b>EGT-<br/>28</b>                  | 548.8 <sup>+2</sup> | <b>y<sub>8</sub><sup>-</sup><br/>NH<sub>3</sub><sup>+2</sup></b> | 811.4 | <b>EGTLv-<br/>28</b>             | 1071.5 | <b>a<sub>7</sub></b>                |
| 120.1               | <b>F</b>                                                         | 270.1               | <b>EGT-<br/>H<sub>2</sub>O</b>      | 552.2               | <b>vl</b>                                                        | 821.3 | <b>EGTLv-<br/>H<sub>2</sub>O</b> | 1078.5 | <b>EGTLvISG-<br/>H<sub>2</sub>O</b> |
| 126.1               | <b>K</b>                                                         | 272.2               | <b>GTL</b>                          | 552.2               | <b>Lv</b>                                                        | 823.4 | <b>GTLvI</b>                     | 1081.5 | <b>b<sub>7</sub>-H<sub>2</sub>O</b> |



|                        |                                                              |                     |                                                              |                     |                                                              |       |                                     |        |                                     |
|------------------------|--------------------------------------------------------------|---------------------|--------------------------------------------------------------|---------------------|--------------------------------------------------------------|-------|-------------------------------------|--------|-------------------------------------|
| 127.1                  | <b>SG-H<sub>2</sub>O</b>                                     | 273.2               | <b>y<sub>3</sub>-H<sub>2</sub>O</b>                          | 557.3 <sup>+2</sup> | <b>y<sub>8</sub><sup>+2</sup></b>                            | 824.4 | <b>y<sub>5</sub>-H<sub>2</sub>O</b> | 1095.5 | <b>y<sub>8</sub>-H<sub>2</sub>O</b> |
| 129.1                  | <b>K</b>                                                     | 274.1               | <b>y<sub>3</sub>-NH<sub>3</sub></b>                          | 611.3               | <b>vis-28</b>                                                | 825.4 | <b>y<sub>5</sub>-NH<sub>3</sub></b> | 1096.5 | <b>EGTLvisG</b>                     |
| 130.1                  | <b>y<sub>1</sub><sup>-</sup>-NH<sub>3</sub></b>              | 277.1               | <b>b<sub>2</sub></b>                                         | 612.8 <sup>+2</sup> | <b>y<sub>9</sub><sup>-</sup>-H<sub>2</sub>O<sup>+2</sup></b> | 825.4 | <b>TLvis-28</b>                     | 1096.5 | <b>y<sub>8</sub>-NH<sub>3</sub></b> |
| 131.1                  | <b>GT-28</b>                                                 | 288.1               | <b>EGT</b>                                                   | 613.3 <sup>+2</sup> | <b>y<sub>9</sub><sup>-</sup>-NH<sub>3</sub><sup>+2</sup></b> | 835.4 | <b>TLvis-H<sub>2</sub>O</b>         | 1099.5 | <b>b<sub>7</sub></b>                |
| 137.1 <sup>+2</sup>    | <b>y<sub>3</sub><sup>-</sup>-H<sub>2</sub>O<sup>+2</sup></b> | 291.2               | <b>y<sub>3</sub></b>                                         | 621.3               | <b>vis-H<sub>2</sub>O</b>                                    | 839.4 | <b>EGTLv</b>                        | 1113.6 | <b>y<sub>8</sub></b>                |
| 137.6 <sup>+2</sup>    | <b>y<sub>3</sub><sup>-</sup>-NH<sub>3</sub><sup>+2</sup></b> | 306.1               | <b>a<sub>3</sub></b>                                         | 621.8 <sup>+2</sup> | <b>y<sub>9</sub><sup>+2</sup></b>                            | 842.4 | <b>y<sub>5</sub></b>                | 1158.5 | <b>a<sub>8</sub></b>                |
| 141.1                  | <b>GT-H<sub>2</sub>O</b>                                     | 316.1               | <b>b<sub>3</sub>-H<sub>2</sub>O</b>                          | 625.3               | <b>TLv-28</b>                                                | 853.4 | <b>TLvis</b>                        | 1168.5 | <b>b<sub>8</sub>-H<sub>2</sub>O</b> |
| 145.1                  | <b>SG</b>                                                    | 334.1               | <b>b<sub>3</sub></b>                                         | 635.3               | <b>TLv-H<sub>2</sub>O</b>                                    | 882.4 | <b>TLvisG-28</b>                    | 1186.5 | <b>b<sub>8</sub></b>                |
| 146.0868 <sup>+2</sup> | <b>y<sub>3</sub><sup>+2</sup></b>                            | 373.2               | <b>EGTL-28</b>                                               | 637.3               | <b>Lvl-28</b>                                                | 882.4 | <b>GTLvis-28</b>                    | 1215.6 | <b>a<sub>9</sub></b>                |
| 147.1                  | <b>y<sub>1</sub></b>                                         | 383.2               | <b>EGTL-H<sub>2</sub>O</b>                                   | 639.3               | <b>vis</b>                                                   | 892.4 | <b>TLvisG-H<sub>2</sub>O</b>        | 1224.6 | <b>y<sub>9</sub>-H<sub>2</sub>O</b> |
| 159.1                  | <b>EG-28</b>                                                 | 386.2               | <b>y<sub>4</sub>-H<sub>2</sub>O</b>                          | 653.3               | <b>TLv</b>                                                   | 892.4 | <b>GTLvis-H<sub>2</sub>O</b>        | 1225.5 | <b>b<sub>9</sub>-H<sub>2</sub>O</b> |
| 159.1                  | <b>GT</b>                                                    | 387.2               | <b>y<sub>4</sub>-NH<sub>3</sub></b>                          | 665.3               | <b>Lvl</b>                                                   | 910.4 | <b>TLvisG</b>                       | 1225.6 | <b>y<sub>9</sub>-NH<sub>3</sub></b> |
| 169.1                  | <b>EG-H<sub>2</sub>O</b>                                     | 401.2               | <b>EGTL</b>                                                  | 668.3               | <b>visG-28</b>                                               | 910.4 | <b>GTLvis</b>                       | 1242.6 | <b>y<sub>9</sub></b>                |
| 173.1                  | <b>IS-28</b>                                                 | 404.3               | <b>y<sub>4</sub></b>                                         | 678.3               | <b>visG-H<sub>2</sub>O</b>                                   | 924.4 | <b>EGTLvl-28</b>                    | 1243.6 | <b>b<sub>9</sub></b>                |
| 183.1                  | <b>IS-H<sub>2</sub>O</b>                                     | 407.2               | <b>a<sub>4</sub></b>                                         | 682.3               | <b>GTLv-28</b>                                               | 934.4 | <b>EGTLvl-H<sub>2</sub>O</b>        | 1371.7 | <b>MH-H<sub>2</sub>O</b>            |
| 187.1                  | <b>EG</b>                                                    | 412.7 <sup>+2</sup> | <b>y<sub>5</sub><sup>-</sup>-H<sub>2</sub>O<sup>+2</sup></b> | 686.3 <sup>+2</sup> | <b>MH-H<sub>2</sub>O<sup>+2</sup></b>                        | 937.5 | <b>y<sub>6</sub>-H<sub>2</sub>O</b> | 1372.6 | <b>MH-NH<sub>3</sub></b>            |
| 187.1                  | <b>y<sub>2</sub><sup>-</sup>-NH<sub>3</sub></b>              | 413.2 <sup>+2</sup> | <b>y<sub>5</sub><sup>-</sup>-NH<sub>3</sub><sup>+2</sup></b> | 686.8 <sup>+2</sup> | <b>MH-NH<sub>3</sub><sup>+2</sup></b>                        | 938.5 | <b>y<sub>6</sub>-NH<sub>3</sub></b> | 1389.7 | <b>MH</b>                           |
| 187.1                  | <b>TL-28</b>                                                 | 417.2               | <b>b<sub>4</sub>-H<sub>2</sub>O</b>                          | 692.3               | <b>GTLv-H<sub>2</sub>O</b>                                   | 939.5 | <b>GTLvisG-28</b>                   |        |                                     |
| 193.6 <sup>+2</sup>    | <b>y<sub>4</sub><sup>-</sup>-H<sub>2</sub>O<sup>+2</sup></b> | 421.7 <sup>+2</sup> | <b>y<sub>5</sub><sup>+2</sup></b>                            | 695.3 <sup>+2</sup> | <b>MH<sup>+2</sup></b>                                       | 949.4 | <b>GTLvisG-H<sub>2</sub>O</b>       |        |                                     |
| 194.1 <sup>+2</sup>    | <b>y<sub>4</sub><sup>-</sup>-NH<sub>3</sub><sup>+2</sup></b> | 435.2               | <b>b<sub>4</sub></b>                                         | 696.3               | <b>visG</b>                                                  | 952.4 | <b>EGTLvl</b>                       |        |                                     |
| 197.1                  | <b>TL-H<sub>2</sub>O</b>                                     | 469.2 <sup>+2</sup> | <b>y<sub>6</sub><sup>-</sup>-H<sub>2</sub>O<sup>+2</sup></b> | 710.3               | <b>GTLv</b>                                                  | 955.5 | <b>y<sub>6</sub></b>                |        |                                     |

# VNISMVLPK

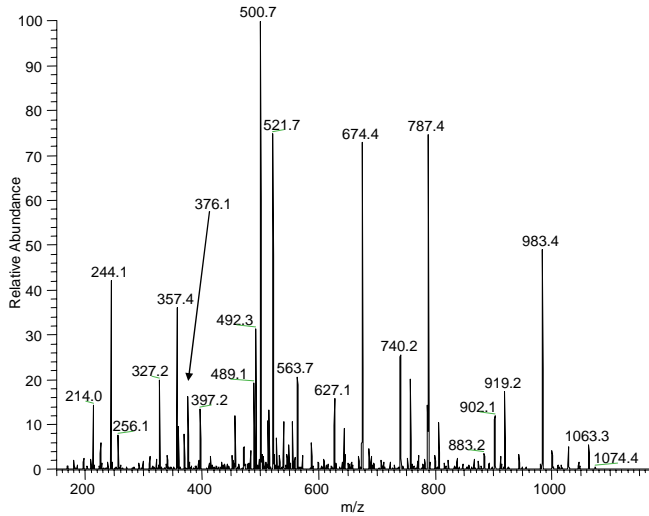

|                     |                                                              |                     |                                                              |                     |                                                              |                     |                                                  |       |                                     |
|---------------------|--------------------------------------------------------------|---------------------|--------------------------------------------------------------|---------------------|--------------------------------------------------------------|---------------------|--------------------------------------------------|-------|-------------------------------------|
| 60.0                | <b>S</b>                                                     | 203.1               | <b>MV-28</b>                                                 | 357.2               | <b>y<sub>3</sub></b>                                         | 523.8 <sup>+2</sup> | <b>y<sub>8</sub>-NH<sub>3</sub><sup>+2</sup></b> | 707.3 | <b>b<sub>5</sub></b>                |
| 65.6 <sup>+2</sup>  | <b>y<sub>1</sub><sup>-</sup>-NH<sub>3</sub><sup>+2</sup></b> | 211.1               | <b>LP</b>                                                    | 362.2               | <b>ul-28</b>                                                 | 526.3               | <b>ISMVL-H<sub>2</sub>O</b>                      | 707.3 | <b>uISMV</b>                        |
| 70.1                | <b>P</b>                                                     | 213.2               | <b>VL</b>                                                    | 376.2               | <b>b<sub>2</sub></b>                                         | 528.3               | <b>SMVLP</b>                                     | 769.5 | <b>y<sub>7</sub>-H<sub>2</sub>O</b> |
| 72.1                | <b>V</b>                                                     | 219.1               | <b>SM</b>                                                    | 385.2 <sup>+2</sup> | <b>y<sub>7</sub><sup>-</sup>-H<sub>2</sub>O<sup>+2</sup></b> | 532.3 <sup>+2</sup> | <b>y<sub>8</sub><sup>+2</sup></b>                | 770.4 | <b>y<sub>7</sub>-NH<sub>3</sub></b> |
| 74.1 <sup>+2</sup>  | <b>y<sub>1</sub><sup>+2</sup></b>                            | 220.2 <sup>+2</sup> | <b>y<sub>4</sub><sup>-</sup>-NH<sub>3</sub><sup>+2</sup></b> | 385.7 <sup>+2</sup> | <b>y<sub>7</sub><sup>-</sup>-NH<sub>3</sub><sup>+2</sup></b> | 544.3               | <b>ISMVL</b>                                     | 778.4 | <b>a<sub>6</sub></b>                |
| 84.1                | <b>K</b>                                                     | 227.1               | <b>y<sub>2</sub>-NH<sub>3</sub></b>                          | 390.2               | <b>ul</b>                                                    | 548.3               | <b>a<sub>4</sub></b>                             | 787.5 | <b>y<sub>7</sub></b>                |
| 86.1                | <b>I</b>                                                     | 228.7 <sup>+2</sup> | <b>y<sub>4</sub><sup>+2</sup></b>                            | 394.2 <sup>+2</sup> | <b>y<sub>7</sub><sup>+2</sup></b>                            | 558.3               | <b>b<sub>4</sub>-H<sub>2</sub>O</b>              | 788.4 | <b>b<sub>6</sub>-H<sub>2</sub>O</b> |
| 86.1                | <b>L</b>                                                     | 231.1               | <b>MV</b>                                                    | 403.2               | <b>SMVL-28</b>                                               | 570.3               | <b>y<sub>5</sub>-NH<sub>3</sub></b>              | 792.4 | <b>uISMVL-28</b>                    |
| 101.1               | <b>K</b>                                                     | 244.2               | <b>y<sub>2</sub></b>                                         | 403.2               | <b>ISMV-28</b>                                               | 572.8 <sup>+2</sup> | <b>MH-H<sub>2</sub>O<sup>+2</sup></b>            | 802.4 | <b>uISMVL-H<sub>2</sub>O</b>        |
| 104.1               | <b>M</b>                                                     | 282.2               | <b>VLP-28</b>                                                | 413.2               | <b>SMVL-H<sub>2</sub>O</b>                                   | 573.3 <sup>+2</sup> | <b>MH-NH<sub>3</sub><sup>+2</sup></b>            | 806.4 | <b>b<sub>6</sub></b>                |
| 114.1 <sup>+2</sup> | <b>y<sub>2</sub><sup>-</sup>-NH<sub>3</sub><sup>+2</sup></b> | 285.7 <sup>+2</sup> | <b>y<sub>5</sub><sup>-</sup>-NH<sub>3</sub><sup>+2</sup></b> | 413.2               | <b>ISMV-H<sub>2</sub>O</b>                                   | 576.3               | <b>b<sub>4</sub></b>                             | 820.4 | <b>uISMVL</b>                       |
| 122.6 <sup>+2</sup> | <b>y<sub>2</sub><sup>+2</sup></b>                            | 290.2               | <b>SMV-28</b>                                                | 413.3               | <b>MVLP-28</b>                                               | 580.3               | <b>uISM-28</b>                                   | 889.5 | <b>uISMVLP-28</b>                   |
| 126.1               | <b>P</b>                                                     | 294.2 <sup>+2</sup> | <b>y<sub>5</sub><sup>+2</sup></b>                            | 431.2               | <b>SMVL</b>                                                  | 581.8 <sup>+2</sup> | <b>MH<sup>+2</sup></b>                           | 891.5 | <b>a<sub>7</sub></b>                |
| 126.1               | <b>K</b>                                                     | 300.1               | <b>SMV-H<sub>2</sub>O</b>                                    | 431.2               | <b>ISMV</b>                                                  | 587.4               | <b>y<sub>5</sub></b>                             | 899.5 | <b>uISMVLP-H<sub>2</sub>O</b>       |
| 129.1               | <b>K</b>                                                     | 304.2               | <b>ISM-28</b>                                                | 439.3               | <b>y<sub>4</sub>-NH<sub>3</sub></b>                          | 590.2               | <b>uISM-H<sub>2</sub>O</b>                       | 901.5 | <b>b<sub>7</sub>-H<sub>2</sub>O</b> |
| 130.1               | <b>y<sub>1</sub>-NH<sub>3</sub></b>                          | 310.2               | <b>VLP</b>                                                   | 441.3               | <b>MVLP</b>                                                  | 608.3               | <b>uISM</b>                                      | 917.5 | <b>uISMVLP</b>                      |
| 147.1               | <b>y<sub>1</sub></b>                                         | 314.2               | <b>ISM-H<sub>2</sub>O</b>                                    | 449.2               | <b>uIS-28</b>                                                | 613.4               | <b>ISMVLP-28</b>                                 | 919.5 | <b>b<sub>7</sub></b>                |
| 170.6 <sup>+2</sup> | <b>y<sub>3</sub><sup>-</sup>-NH<sub>3</sub><sup>+2</sup></b> | 316.2               | <b>MVL-28</b>                                                | 456.3               | <b>y<sub>4</sub></b>                                         | 623.4               | <b>ISMVLP-H<sub>2</sub>O</b>                     | 988.5 | <b>a<sub>8</sub></b>                |
| 173.1               | <b>IS-28</b>                                                 | 318.1               | <b>SMV</b>                                                   | 459.2               | <b>uIS-H<sub>2</sub>O</b>                                    | 641.4               | <b>ISMVLP</b>                                    | 998.5 | <b>b<sub>8</sub>-H<sub>2</sub>O</b> |

|                     |                                   |                     |                                                                  |                     |                                                                  |       |                                     |        |                                     |
|---------------------|-----------------------------------|---------------------|------------------------------------------------------------------|---------------------|------------------------------------------------------------------|-------|-------------------------------------|--------|-------------------------------------|
| 179.1 <sup>+2</sup> | <b>y<sub>3</sub><sup>+2</sup></b> | 328.7 <sup>+2</sup> | <b>y<sub>6</sub><sup>-</sup><br/>H<sub>2</sub>O<sup>+2</sup></b> | 461.3               | <b>a<sub>3</sub></b>                                             | 656.4 | <b>y<sub>6</sub>-H<sub>2</sub>O</b> | 1016.5 | <b>b<sub>8</sub></b>                |
| 183.1               | <b>IS-H<sub>2</sub>O</b>          | 329.2 <sup>+2</sup> | <b>y<sub>6</sub><sup>-</sup><br/>NH<sub>3</sub><sup>+2</sup></b> | 477.2               | <b>uIS</b>                                                       | 657.4 | <b>y<sub>6</sub>-NH<sub>3</sub></b> | 1045.6 | <b>y<sub>8</sub>-H<sub>2</sub>O</b> |
| 183.1               | <b>LP-28</b>                      | 332.2               | <b>ISM</b>                                                       | 489.3               | <b>b<sub>3</sub></b>                                             | 674.4 | <b>y<sub>6</sub></b>                | 1046.5 | <b>y<sub>8</sub>-NH<sub>3</sub></b> |
| 185.2               | <b>VL-28</b>                      | 337.7 <sup>+2</sup> | <b>y<sub>6</sub><sup>+2</sup></b>                                | 500.3               | <b>SMVLP-<br/>28</b>                                             | 679.3 | <b>a<sub>5</sub></b>                | 1063.6 | <b>y<sub>8</sub></b>                |
| 191.1               | <b>SM-28</b>                      | 340.2               | <b>y<sub>3</sub>-NH<sub>3</sub></b>                              | 510.3               | <b>SMVLP-<br/>H<sub>2</sub>O</b>                                 | 679.3 | <b>uISMV-<br/>28</b>                | 1144.6 | <b>MH-H<sub>2</sub>O</b>            |
| 201.1               | <b>SM-<br/>H<sub>2</sub>O</b>     | 344.2               | <b>MVL</b>                                                       | 516.3               | <b>ISMVL-<br/>28</b>                                             | 689.3 | <b>b<sub>5</sub>-H<sub>2</sub>O</b> | 1145.6 | <b>MH-NH<sub>3</sub></b>            |
| 201.1               | <b>IS</b>                         | 348.2               | <b>a<sub>2</sub></b>                                             | 523.3 <sup>+2</sup> | <b>y<sub>8</sub><sup>-</sup><br/>H<sub>2</sub>O<sup>+2</sup></b> | 689.3 | <b>uISMV-<br/>H<sub>2</sub>O</b>    | 1162.6 | <b>MH</b>                           |

## VNISMVLPK

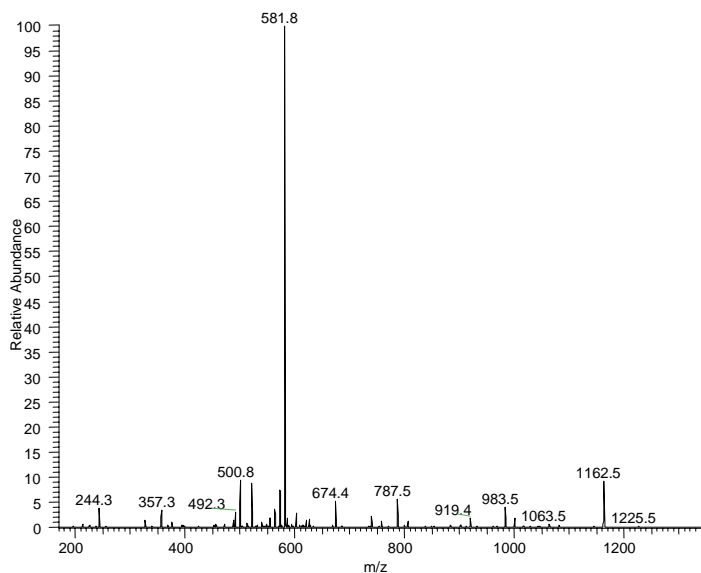

|                    |                                                                  |                     |                                                                  |                     |                                                                  |                     |                                                  |       |                                     |
|--------------------|------------------------------------------------------------------|---------------------|------------------------------------------------------------------|---------------------|------------------------------------------------------------------|---------------------|--------------------------------------------------|-------|-------------------------------------|
| 60.0               | <b>S</b>                                                         | 203.1               | <b>MV-28</b>                                                     | 385.2 <sup>+2</sup> | <b>y<sub>7</sub><sup>-</sup><br/>H<sub>2</sub>O<sup>+2</sup></b> | 604.8 <sup>+2</sup> | <b>y<sub>8</sub>-NH<sub>3</sub><sup>+2</sup></b> | 841.4 | <b>a<sub>5</sub></b>                |
| 65.5 <sup>+2</sup> | <b>y<sub>1</sub><sup>-</sup><br/>NH<sub>3</sub><sup>+2</sup></b> | 211.1               | <b>LP</b>                                                        | 385.7 <sup>+2</sup> | <b>y<sub>7</sub><sup>-</sup><br/>NH<sub>3</sub><sup>+2</sup></b> | 611.3               | <b>vIS-28</b>                                    | 851.4 | <b>b<sub>5</sub>-H<sub>2</sub>O</b> |
| 70.1               | <b>P</b>                                                         | 213.2               | <b>VL</b>                                                        | 394.2 <sup>+2</sup> | <b>y<sub>7</sub><sup>+2</sup></b>                                | 613.3 <sup>+2</sup> | <b>y<sub>8</sub><sup>+2</sup></b>                | 851.4 | <b>vISMV-<br/>H<sub>2</sub>O</b>    |
| 72.1               | <b>V</b>                                                         | 219.1               | <b>SM</b>                                                        | 403.2               | <b>ISMV-<br/>28</b>                                              | 613.4               | <b>ISMVLP-<br/>28</b>                            | 869.4 | <b>vISMV</b>                        |
| 74.1 <sup>+2</sup> | <b>y<sub>1</sub><sup>+2</sup></b>                                | 220.2 <sup>+2</sup> | <b>y<sub>4</sub><sup>-</sup><br/>NH<sub>3</sub><sup>+2</sup></b> | 403.2               | <b>SMVL-<br/>28</b>                                              | 621.3               | <b>vIS-H<sub>2</sub>O</b>                        | 869.4 | <b>b<sub>5</sub></b>                |
| 84.1               | <b>K</b>                                                         | 227.1               | <b>y<sub>2</sub>-NH<sub>3</sub></b>                              | 413.2               | <b>ISMV-<br/>H<sub>2</sub>O</b>                                  | 623.3               | <b>a<sub>3</sub></b>                             | 940.5 | <b>a<sub>6</sub></b>                |
| 86.1               | <b>I</b>                                                         | 228.7 <sup>+2</sup> | <b>y<sub>4</sub><sup>+2</sup></b>                                | 413.2               | <b>SMVL-<br/>H<sub>2</sub>O</b>                                  | 623.4               | <b>ISMVLP-<br/>H<sub>2</sub>O</b>                | 950.4 | <b>b<sub>6</sub>-H<sub>2</sub>O</b> |
| 86.1               | <b>L</b>                                                         | 231.1               | <b>MV</b>                                                        | 413.3               | <b>MVLP-<br/>28</b>                                              | 639.3               | <b>vIS</b>                                       | 954.5 | <b>vISMVL-<br/>28</b>               |
| 101.1              | <b>K</b>                                                         | 244.2               | <b>y<sub>2</sub></b>                                             | 431.2               | <b>ISMV</b>                                                      | 641.4               | <b>ISMVLP</b>                                    | 964.5 | <b>vISMVL-<br/>H<sub>2</sub>O</b>   |
| 104.1              | <b>M</b>                                                         | 282.2               | <b>VLP-28</b>                                                    | 431.2               | <b>SMVL</b>                                                      | 651.3               | <b>b<sub>3</sub></b>                             | 968.4 | <b>b<sub>6</sub></b>                |

|                     |                                                              |                     |                                                              |                     |                                                              |                     |                                       |        |                                     |
|---------------------|--------------------------------------------------------------|---------------------|--------------------------------------------------------------|---------------------|--------------------------------------------------------------|---------------------|---------------------------------------|--------|-------------------------------------|
| 114.1 <sup>+2</sup> | <b>y<sub>2</sub><sup>-</sup>-NH<sub>3</sub><sup>+2</sup></b> | 285.7 <sup>+2</sup> | <b>y<sub>5</sub><sup>-</sup>-NH<sub>3</sub><sup>+2</sup></b> | 439.3               | <b>y<sub>4</sub>-NH<sub>3</sub></b>                          | 653.8 <sup>+2</sup> | <b>MH-H<sub>2</sub>O<sup>+2</sup></b> | 982.5  | <b>vISMVL</b>                       |
| 122.6 <sup>+2</sup> | <b>y<sub>2</sub><sup>+2</sup></b>                            | 290.2               | <b>SMV-28</b>                                                | 441.3               | <b>MVLP</b>                                                  | 654.3 <sup>+2</sup> | <b>MH-NH<sub>3</sub><sup>+2</sup></b> | 1051.5 | <b>vISMVLP-28</b>                   |
| 126.1               | <b>P</b>                                                     | 294.2 <sup>+2</sup> | <b>y<sub>5</sub><sup>+2</sup></b>                            | 456.3               | <b>y<sub>4</sub></b>                                         | 656.4               | <b>y<sub>6</sub>-H<sub>2</sub>O</b>   | 1053.5 | <b>a<sub>7</sub></b>                |
| 126.1               | <b>K</b>                                                     | 300.1               | <b>SMV-H<sub>2</sub>O</b>                                    | 500.3               | <b>SMVLP-28</b>                                              | 657.4               | <b>y<sub>6</sub>-NH<sub>3</sub></b>   | 1061.5 | <b>vISMVLP-H<sub>2</sub>O</b>       |
| 129.1               | <b>K</b>                                                     | 304.2               | <b>ISM-28</b>                                                | 510.2               | <b>a<sub>2</sub></b>                                         | 662.9 <sup>+2</sup> | <b>MH<sup>+2</sup></b>                | 1063.5 | <b>b<sub>7</sub>-H<sub>2</sub>O</b> |
| 130.1               | <b>y<sub>1</sub>-NH<sub>3</sub></b>                          | 310.2               | <b>VLP</b>                                                   | 510.3               | <b>SMVLP-H<sub>2</sub>O</b>                                  | 674.4               | <b>y<sub>6</sub></b>                  | 1079.5 | <b>vISMVLP</b>                      |
| 147.1               | <b>y<sub>1</sub></b>                                         | 314.2               | <b>ISM-H<sub>2</sub>O</b>                                    | 516.3               | <b>ISMVL-28</b>                                              | 710.3               | <b>a<sub>4</sub></b>                  | 1081.5 | <b>b<sub>7</sub></b>                |
| 170.6 <sup>+2</sup> | <b>y<sub>3</sub><sup>-</sup>-NH<sub>3</sub><sup>+2</sup></b> | 316.2               | <b>MVL-28</b>                                                | 524.2               | <b>vl-28</b>                                                 | 720.3               | <b>b<sub>4</sub>-H<sub>2</sub>O</b>   | 1150.6 | <b>a<sub>8</sub></b>                |
| 173.1               | <b>IS-28</b>                                                 | 318.1               | <b>SMV</b>                                                   | 526.3               | <b>ISMVL-H<sub>2</sub>O</b>                                  | 738.3               | <b>b<sub>4</sub></b>                  | 1160.6 | <b>b<sub>8</sub>-H<sub>2</sub>O</b> |
| 179.1 <sup>+2</sup> | <b>y<sub>3</sub><sup>+2</sup></b>                            | 328.7 <sup>+2</sup> | <b>y<sub>6</sub><sup>-</sup>-H<sub>2</sub>O<sup>+2</sup></b> | 528.3               | <b>SMVLP</b>                                                 | 742.3               | <b>vISM-28</b>                        | 1178.6 | <b>b<sub>8</sub></b>                |
| 183.1               | <b>IS-H<sub>2</sub>O</b>                                     | 329.2 <sup>+2</sup> | <b>y<sub>6</sub><sup>-</sup>-NH<sub>3</sub><sup>+2</sup></b> | 538.2               | <b>b<sub>2</sub></b>                                         | 752.3               | <b>vISM-H<sub>2</sub>O</b>            | 1207.6 | <b>y<sub>8</sub>-H<sub>2</sub>O</b> |
| 183.1               | <b>LP-28</b>                                                 | 332.2               | <b>ISM</b>                                                   | 544.3               | <b>ISMVL</b>                                                 | 769.5               | <b>y<sub>7</sub>-H<sub>2</sub>O</b>   | 1208.6 | <b>y<sub>8</sub>-NH<sub>3</sub></b> |
| 185.2               | <b>VL-28</b>                                                 | 337.7 <sup>+2</sup> | <b>y<sub>6</sub><sup>+2</sup></b>                            | 552.2               | <b>vl</b>                                                    | 770.3               | <b>vISM</b>                           | 1225.6 | <b>y<sub>8</sub></b>                |
| 191.1               | <b>SM-28</b>                                                 | 340.2               | <b>y<sub>3</sub>-NH<sub>3</sub></b>                          | 570.3               | <b>y<sub>5</sub>-NH<sub>3</sub></b>                          | 770.4               | <b>y<sub>7</sub>-NH<sub>3</sub></b>   | 1306.7 | <b>MH-H<sub>2</sub>O</b>            |
| 201.1               | <b>SM-H<sub>2</sub>O</b>                                     | 344.2               | <b>MVL</b>                                                   | 587.4               | <b>y<sub>5</sub></b>                                         | 787.5               | <b>y<sub>7</sub></b>                  | 1307.7 | <b>MH-NH<sub>3</sub></b>            |
| 201.1               | <b>IS</b>                                                    | 357.2               | <b>y<sub>3</sub></b>                                         | 604.3 <sup>+2</sup> | <b>y<sub>8</sub><sup>-</sup>-H<sub>2</sub>O<sup>+2</sup></b> | 841.4               | <b>vISMV-28</b>                       | 1324.7 | <b>MH</b>                           |

## YFNVSTGSSLR

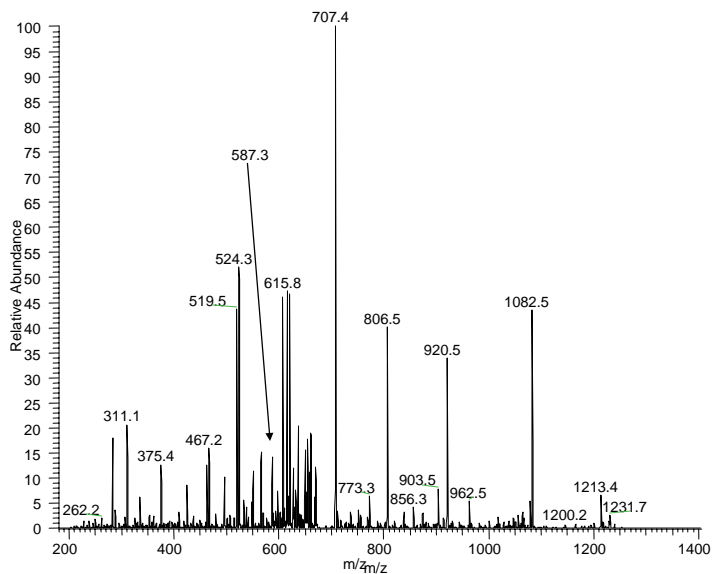

|      |          |                     |                                                              |       |                                     |       |                            |       |                               |
|------|----------|---------------------|--------------------------------------------------------------|-------|-------------------------------------|-------|----------------------------|-------|-------------------------------|
| 60.0 | <b>S</b> | 222.6 <sup>+2</sup> | <b>y<sub>4</sub><sup>-</sup>-H<sub>2</sub>O<sup>+2</sup></b> | 358.2 | <b>y<sub>3</sub>-NH<sub>3</sub></b> | 582.3 | <b>FuVS-28</b>             | 806.4 | <b>y<sub>8</sub></b>          |
| 70.1 | <b>R</b> | 223.1 <sup>+2</sup> | <b>y<sub>4</sub><sup>-</sup>-NH<sub>3</sub><sup>+2</sup></b> | 375.2 | <b>y<sub>3</sub></b>                | 587.2 | <b>b<sub>3</sub></b>       | 827.4 | <b>FuVSTGS-28</b>             |
| 72.1 | <b>V</b> | 228.1               | <b>TGS-H<sub>2</sub>O</b>                                    | 376.2 | <b>uV</b>                           | 592.3 | <b>FuVS-H<sub>2</sub>O</b> | 837.4 | <b>FuVSTGS-H<sub>2</sub>O</b> |

|                     |                                               |                     |                                                |                     |                                                |                     |                                                 |        |                                   |
|---------------------|-----------------------------------------------|---------------------|------------------------------------------------|---------------------|------------------------------------------------|---------------------|-------------------------------------------------|--------|-----------------------------------|
| 74.1                | T                                             | 228.1               | STG-H <sub>2</sub> O                           | 392.2               | STGSS-28                                       | 593.3               | uVSTG-28                                        | 846.4  | a <sub>6</sub>                    |
| 79.6 <sup>+2</sup>  | y <sub>1</sub> -NH <sub>3</sub> <sup>+2</sup> | 231.6 <sup>+2</sup> | y <sub>4</sub> <sup>+2</sup>                   | 394.7 <sup>+2</sup> | y <sub>8</sub> -H <sub>2</sub> O <sup>+2</sup> | 602.3               | y <sub>6</sub> -H <sub>2</sub> O                | 855.4  | FuVSTGS                           |
| 86.1                | L                                             | 232.1               | GSS                                            | 395.2 <sup>+2</sup> | y <sub>8</sub> -NH <sub>3</sub> <sup>+2</sup>  | 603.3               | uVSTG-H <sub>2</sub> O                          | 856.4  | b <sub>6</sub> -H <sub>2</sub> O  |
| 87.1                | R                                             | 246.1               | STG                                            | 396.2               | Fu-28                                          | 603.3               | y <sub>6</sub> -NH <sub>3</sub>                 | 874.4  | b <sub>6</sub>                    |
| 88.1 <sup>+2</sup>  | y <sub>1</sub> <sup>+2</sup>                  | 246.1               | TGS                                            | 402.2               | STGSS-H <sub>2</sub> O                         | 604.3               | VSTGSSL-28                                      | 880.4  | uVSTGSSL-28                       |
| 100.1               | R                                             | 251.1 <sup>+2</sup> | y <sub>5</sub> -H <sub>2</sub> O <sup>+2</sup> | 403.7 <sup>+2</sup> | y <sub>8</sub> <sup>+2</sup>                   | 606.3 <sup>+2</sup> | y <sub>10</sub> -H <sub>2</sub> O <sup>+2</sup> | 890.4  | uVSTGSSL-H <sub>2</sub> O         |
| 112.1               | R                                             | 251.6 <sup>+2</sup> | y <sub>5</sub> -NH <sub>3</sub> <sup>+2</sup>  | 404.2               | VSTGS-28                                       | 606.8 <sup>+2</sup> | y <sub>10</sub> -NH <sub>3</sub> <sup>+2</sup>  | 903.4  | a <sub>7</sub>                    |
| 117.1               | GS-28                                         | 260.2 <sup>+2</sup> | y <sub>5</sub> <sup>+2</sup>                   | 414.2               | VSTGS-H <sub>2</sub> O                         | 610.3               | FuVS                                            | 908.4  | uVSTGSSL                          |
| 120.1               | F                                             | 260.2               | SSL-28                                         | 418.2               | TGSSL-28                                       | 614.3               | VSTGSSL-H <sub>2</sub> O                        | 913.4  | b <sub>7</sub> -H <sub>2</sub> O  |
| 127.1               | GS-H <sub>2</sub> O                           | 260.2               | VST-28                                         | 420.2               | STGSS                                          | 615. <sup>+2</sup>  | y <sub>10</sub> <sup>+2</sup>                   | 914.4  | FuVSTGSS-28                       |
| 131.1               | TG-28                                         | 270.1               | SSL-H <sub>2</sub> O                           | 424.2               | Fu                                             | 620.3               | y <sub>6</sub>                                  | 924.4  | FuVSTGSS-H <sub>2</sub> O         |
| 136.1               | Y                                             | 270.1               | VST-H <sub>2</sub> O                           | 428.2               | TGSSL-H <sub>2</sub> O                         | 621.3               | uVSTG                                           | 931.4  | b <sub>7</sub>                    |
| 136.1 <sup>+2</sup> | y <sub>2</sub> -NH <sub>3</sub> <sup>+2</sup> | 271.2               | y <sub>2</sub> -NH <sub>3</sub>                | 432.2               | VSTGS                                          | 632.3               | VSTGSSL                                         | 942.4  | FuVSTGSS                          |
| 141.1               | TG-H <sub>2</sub> O                           | 283.1               | a <sub>2</sub>                                 | 435.2               | uVS-28                                         | 658.3               | a <sub>4</sub>                                  | 990.4  | a <sub>8</sub>                    |
| 144.6 <sup>+2</sup> | y <sub>2</sub> <sup>+2</sup>                  | 288.2               | SSL                                            | 444.3               | y <sub>4</sub> -H <sub>2</sub> O               | 680.3               | uVSTGS-28                                       | 1000.4 | b <sub>8</sub> -H <sub>2</sub> O  |
| 145.1               | GS                                            | 288.2               | VST                                            | 445.2               | uVS-H <sub>2</sub> O                           | 683.3               | FuVST-28                                        | 1018.4 | b <sub>8</sub>                    |
| 147.1               | SS-28                                         | 288.2               | y <sub>2</sub>                                 | 445.2               | y <sub>4</sub> -NH <sub>3</sub>                | 686.3               | b <sub>4</sub>                                  | 1027.5 | FuVSTGSSL-28                      |
| 157.1               | SS-H <sub>2</sub> O                           | 301.7 <sup>+2</sup> | y <sub>6</sub> -H <sub>2</sub> O <sup>+2</sup> | 446.2               | TGSSL                                          | 687.8 <sup>+2</sup> | MH-H <sub>2</sub> O <sup>+2</sup>               | 1037.5 | FuVSTGSSL-H <sub>2</sub> O        |
| 158.1               | y <sub>1</sub> -NH <sub>3</sub>               | 302.2 <sup>+2</sup> | y <sub>6</sub> -NH <sub>3</sub> <sup>+2</sup>  | 462.3               | y <sub>4</sub>                                 | 688.3 <sup>+2</sup> | MH-NH <sub>3</sub> <sup>+2</sup>                | 1055.5 | FuVSTGSSL                         |
| 159.1               | TG                                            | 305.1               | TGSS-28                                        | 463.2               | uVS                                            | 689.4               | y <sub>7</sub> -H <sub>2</sub> O                | 1064.5 | y <sub>9</sub> -H <sub>2</sub> O  |
| 159.1               | VS-28                                         | 305.1               | STGS-28                                        | 491.2               | VSTGSS-28                                      | 690.3               | uVSTGS-H <sub>2</sub> O                         | 1065.5 | y <sub>9</sub> -NH <sub>3</sub>   |
| 161.1               | ST-28                                         | 310.7 <sup>+2</sup> | y <sub>6</sub> <sup>+2</sup>                   | 495.2               | FuV-28                                         | 690.3               | y <sub>7</sub> -NH <sub>3</sub>                 | 1077.5 | a <sub>9</sub>                    |
| 169.1               | VS-H <sub>2</sub> O                           | 311.1               | b <sub>2</sub>                                 | 501.2               | VSTGSS-H <sub>2</sub> O                        | 693.3               | FuVST-H <sub>2</sub> O                          | 1082.5 | y <sub>9</sub>                    |
| 171.1               | ST-H <sub>2</sub> O                           | 315.1               | TGSS-H <sub>2</sub> O                          | 501.3               | y <sub>5</sub> -H <sub>2</sub> O               | 696.8 <sup>+2</sup> | MH <sup>+2</sup>                                | 1087.5 | b <sub>9</sub> -H <sub>2</sub> O  |
| 173.1               | SL-28                                         | 315.1               | STGS-H <sub>2</sub> O                          | 502.3               | y <sub>5</sub> -NH <sub>3</sub>                | 707.4               | y <sub>7</sub>                                  | 1105.5 | b <sub>9</sub>                    |
| 175.1               | SS                                            | 317.2               | GSSL-28                                        | 505.3               | STGSSL-28                                      | 708.3               | uVSTGS                                          | 1190.6 | a <sub>10</sub>                   |
| 175.1               | y <sub>1</sub>                                | 317.2               | VSTG-28                                        | 515.2               | STGSSL-H <sub>2</sub> O                        | 711.3               | FuVST                                           | 1200.5 | b <sub>10</sub> -H <sub>2</sub> O |

|                        |                                                              |                     |                                                              |                     |                                                  |       |                                     |        |                                      |
|------------------------|--------------------------------------------------------------|---------------------|--------------------------------------------------------------|---------------------|--------------------------------------------------|-------|-------------------------------------|--------|--------------------------------------|
| 179.1159 <sup>+2</sup> | <b>Y<sub>3</sub><sup>-</sup>-H<sub>2</sub>O<sup>+2</sup></b> | 327.2               | <b>GSSL-H<sub>2</sub>O</b>                                   | 519.2               | <b>VSTGSS</b>                                    | 740.3 | <b>FuVSTG-28</b>                    | 1211.6 | <b>y<sub>10</sub>-H<sub>2</sub>O</b> |
| 179.6079 <sup>+2</sup> | <b>Y<sub>3</sub><sup>-</sup>-NH<sub>3</sub><sup>+2</sup></b> | 327.2               | <b>VSTG-H<sub>2</sub>O</b>                                   | 519.3               | <b>y<sub>5</sub></b>                             | 745.3 | <b>a<sub>5</sub></b>                | 1212.6 | <b>y<sub>10</sub>-NH<sub>3</sub></b> |
| 183.1                  | <b>SL-H<sub>2</sub>O</b>                                     | 333.1               | <b>STGS</b>                                                  | 523.2               | <b>FuV</b>                                       | 750.3 | <b>FuVSTG-H<sub>2</sub>O</b>        | 1218.6 | <b>b<sub>10</sub></b>                |
| 187.1                  | <b>VS</b>                                                    | 333.1               | <b>TGSS</b>                                                  | 532.8 <sup>+2</sup> | <b>y<sub>9</sub>-H<sub>2</sub>O<sup>+2</sup></b> | 755.3 | <b>b<sub>5</sub>-H<sub>2</sub>O</b> | 1229.6 | <b>y<sub>10</sub></b>                |
| 188.1 <sup>+2</sup>    | <b>y<sub>3</sub><sup>+2</sup></b>                            | 345.2               | <b>GSSL</b>                                                  | 533.3               | <b>STGSSL</b>                                    | 767.3 | <b>uVSTGSS-28</b>                   | 1374.7 | <b>MH-H<sub>2</sub>O</b>             |
| 189.1                  | <b>ST</b>                                                    | 345.2               | <b>VSTG</b>                                                  | 533.3 <sup>+2</sup> | <b>y<sub>9</sub>-NH<sub>3</sub><sup>+2</sup></b> | 768.3 | <b>FuVSTG</b>                       | 1375.6 | <b>MH-NH<sub>3</sub></b>             |
| 201.1                  | <b>SL</b>                                                    | 345.2 <sup>+2</sup> | <b>y<sub>7</sub><sup>-</sup>-H<sub>2</sub>O<sup>+2</sup></b> | 536.3               | <b>uVST-28</b>                                   | 773.3 | <b>b<sub>5</sub></b>                | 1392.7 | <b>MH</b>                            |
| 204.1                  | <b>GSS-28</b>                                                | 345.7 <sup>+2</sup> | <b>y<sub>7</sub><sup>-</sup>-NH<sub>3</sub><sup>+2</sup></b> | 541.8 <sup>+2</sup> | <b>y<sub>9</sub><sup>+2</sup></b>                | 777.3 | <b>uVSTGSS-H<sub>2</sub>O</b>       |        |                                      |
| 214.1                  | <b>GSS-H<sub>2</sub>O</b>                                    | 348.2               | <b>uV-28</b>                                                 | 546.2               | <b>uVST-H<sub>2</sub>O</b>                       | 788.4 | <b>y<sub>8</sub>-H<sub>2</sub>O</b> |        |                                      |
| 218.1                  | <b>STG-28</b>                                                | 354.2 <sup>+2</sup> | <b>y<sub>7</sub><sup>+2</sup></b>                            | 559.2               | <b>a<sub>3</sub></b>                             | 789.4 | <b>y<sub>8</sub>-NH<sub>3</sub></b> |        |                                      |
| 218.1                  | <b>TGS-28</b>                                                | 357.2               | <b>y<sub>3</sub><sup>-</sup>-H<sub>2</sub>O</b>              | 564.3               | <b>uVST</b>                                      | 795.3 | <b>uVSTGSS</b>                      |        |                                      |

## YFNVSTGSSLR

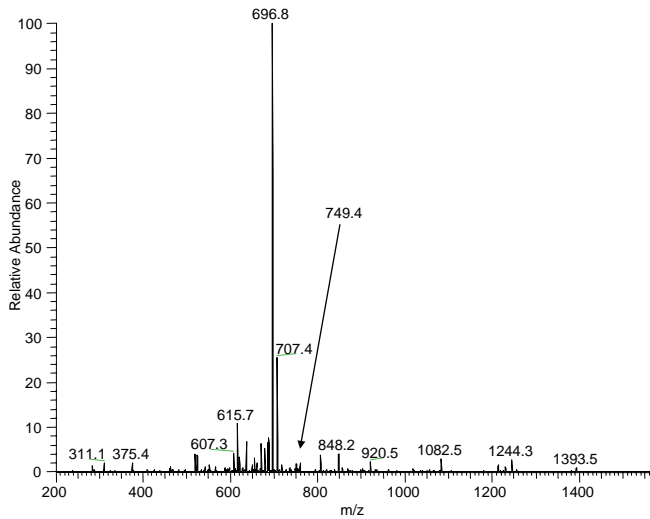

|                    |                                                              |                     |                                                              |                     |                                                  |                     |                                                   |        |                                     |
|--------------------|--------------------------------------------------------------|---------------------|--------------------------------------------------------------|---------------------|--------------------------------------------------|---------------------|---------------------------------------------------|--------|-------------------------------------|
| 60.0               | <b>S</b>                                                     | 222.6 <sup>+2</sup> | <b>Y<sub>4</sub><sup>-</sup>-H<sub>2</sub>O<sup>+2</sup></b> | 375.2               | <b>y<sub>3</sub></b>                             | 657.3               | <b>FvV-28</b>                                     | 957.4  | <b>vVSTGSS</b>                      |
| 70.1               | <b>R</b>                                                     | 223.1 <sup>+2</sup> | <b>Y<sub>4</sub><sup>-</sup>-NH<sub>3</sub><sup>+2</sup></b> | 392.2               | <b>STGSS-28</b>                                  | 685.3               | <b>FvV</b>                                        | 989.4  | <b>FvVSTGS-28</b>                   |
| 72.1               | <b>V</b>                                                     | 228.1               | <b>STG-H<sub>2</sub>O</b>                                    | 394.7 <sup>+2</sup> | <b>y<sub>8</sub>-H<sub>2</sub>O<sup>+2</sup></b> | 687.3 <sup>+2</sup> | <b>y<sub>10</sub>-H<sub>2</sub>O<sup>+2</sup></b> | 999.4  | <b>FvVSTGS-H<sub>2</sub>O</b>       |
| 74.1               | <b>T</b>                                                     | 228.1               | <b>TGS-H<sub>2</sub>O</b>                                    | 395.2 <sup>+2</sup> | <b>y<sub>8</sub>-NH<sub>3</sub><sup>+2</sup></b> | 687.8 <sup>+2</sup> | <b>y<sub>10</sub>-NH<sub>3</sub><sup>+2</sup></b> | 1008.4 | <b>a<sub>6</sub></b>                |
| 79.6 <sup>+2</sup> | <b>y<sub>1</sub><sup>-</sup>-NH<sub>3</sub><sup>+2</sup></b> | 231.6 <sup>+2</sup> | <b>y<sub>4</sub><sup>+2</sup></b>                            | 402.2               | <b>STGSS-H<sub>2</sub>O</b>                      | 689.4               | <b>y<sub>7</sub>-H<sub>2</sub>O</b>               | 1017.4 | <b>FvVSTGS</b>                      |
| 86.1               | <b>L</b>                                                     | 232.1               | <b>GSS</b>                                                   | 403.7 <sup>+2</sup> | <b>y<sub>8</sub><sup>+2</sup></b>                | 690.3               | <b>y<sub>7</sub>-NH<sub>3</sub></b>               | 1018.4 | <b>b<sub>6</sub>-H<sub>2</sub>O</b> |

|                     |                                           |                        |                                           |       |                           |                     |                                   |        |                            |
|---------------------|-------------------------------------------|------------------------|-------------------------------------------|-------|---------------------------|---------------------|-----------------------------------|--------|----------------------------|
| 87.1                | R                                         | 246.1                  | STG                                       | 404.2 | VSTGS-28                  | 696.3 <sup>+2</sup> | $y_{10}^{+2}$                     | 1036.4 | $b_6$                      |
| 88.1 <sup>+2</sup>  | $y_1^{+2}$                                | 246.1                  | TGS                                       | 414.2 | VSTGS-H <sub>2</sub> O    | 698.3               | vVST-28                           | 1042.5 | vVSTGSSL-28                |
| 100.1               | R                                         | 251.1 <sup>+2</sup>    | $y_5^-$<br>H <sub>2</sub> O <sup>+2</sup> | 418.2 | TGSSL-28                  | 707.4               | $y_7$                             | 1052.5 | vVSTGSSL-H <sub>2</sub> O  |
| 112.1               | R                                         | 251.6346 <sup>+2</sup> | $y_5^-$<br>NH <sub>3</sub> <sup>+2</sup>  | 420.2 | STGSS                     | 708.3               | vVST-H <sub>2</sub> O             | 1065.5 | $a_7$                      |
| 117.1               | GS-28                                     | 260.1479 <sup>+2</sup> | $y_5^{+2}$                                | 428.2 | TGSSL-H <sub>2</sub> O    | 721.3               | $a_3$                             | 1070.5 | vVSTGSSL                   |
| 120.1               | F                                         | 260.2                  | VST-28                                    | 432.2 | VSTGS                     | 726.3               | vVST                              | 1075.4 | $b_7$ -H <sub>2</sub> O    |
| 127.1               | GS-H <sub>2</sub> O                       | 260.2                  | SSL-28                                    | 444.3 | $y_4$ -H <sub>2</sub> O   | 744.3               | FvVS-28                           | 1076.5 | FvVSTGSS-28                |
| 131.1               | TG-28                                     | 270.1                  | VST-H <sub>2</sub> O                      | 445.2 | $y_4$ -NH <sub>3</sub>    | 749.3               | $b_3$                             | 1086.4 | FvVSTGSS-H <sub>2</sub> O  |
| 136.1               | Y                                         | 270.1                  | SSL-H <sub>2</sub> O                      | 446.2 | TGSSL                     | 754.3               | FvVS-H <sub>2</sub> O             | 1093.5 | $b_7$                      |
| 136.1 <sup>+2</sup> | $y_2^-$<br>NH <sub>3</sub> <sup>+2</sup>  | 271.2                  | $y_2^-$ -NH <sub>3</sub>                  | 462.3 | $y_4$                     | 755.3               | vVSTG-28                          | 1104.5 | FvVSTGSS                   |
| 141.1               | TG-H <sub>2</sub> O                       | 283.1                  | $a_2$                                     | 491.2 | VSTGSS-28                 | 765.3               | vVSTG-H <sub>2</sub> O            | 1152.5 | $a_8$                      |
| 144.6 <sup>+2</sup> | $y_2^{+2}$                                | 288.2                  | VST                                       | 501.2 | VSTGSS-H <sub>2</sub> O   | 768.9 <sup>+2</sup> | MH-H <sub>2</sub> O <sup>+2</sup> | 1162.5 | $b_8$ -H <sub>2</sub> O    |
| 145.1               | GS                                        | 288.2                  | SSL                                       | 501.3 | $y_5^-$ -H <sub>2</sub> O | 769.4 <sup>+2</sup> | MH-NH <sub>3</sub> <sup>+2</sup>  | 1180.5 | $b_8$                      |
| 147.1               | SS-28                                     | 288.2                  | $y_2$                                     | 502.3 | $y_5^-$ -NH <sub>3</sub>  | 772.3               | FvVS                              | 1189.5 | FvVSTGSSL-28               |
| 157.1               | SS-H <sub>2</sub> O                       | 301.6665 <sup>+2</sup> | $y_6^-$<br>H <sub>2</sub> O <sup>+2</sup> | 505.3 | STGSSL-28                 | 777.9 <sup>+2</sup> | MH <sup>+2</sup>                  | 1199.5 | FvVSTGSSL-H <sub>2</sub> O |
| 158.1               | $y_1^-$<br>NH <sub>3</sub>                | 302.1585 <sup>+2</sup> | $y_6^-$<br>NH <sub>3</sub> <sup>+2</sup>  | 510.2 | vV-28                     | 783.3               | vVSTG                             | 1217.5 | FvVSTGSSL                  |
| 159.1               | TG                                        | 305.1                  | STGS-28                                   | 515.2 | STGSSL-H <sub>2</sub> O   | 788.4               | $y_8$ -H <sub>2</sub> O           | 1226.6 | $y_9$ -H <sub>2</sub> O    |
| 159.1               | VS-28                                     | 305.1                  | TGSS-28                                   | 519.2 | VSTGSS                    | 789.4               | $y_8$ -NH <sub>3</sub>            | 1227.6 | $y_9$ -NH <sub>3</sub>     |
| 161.1               | ST-28                                     | 310.6717 <sup>+2</sup> | $y_6^{+2}$                                | 519.3 | $y_5$                     | 806.4               | $y_8$                             | 1239.5 | $a_9$                      |
| 169.1               | VS-H <sub>2</sub> O                       | 311.1                  | $b_2$                                     | 533.3 | STGSSL                    | 820.4               | $a_4$                             | 1244.6 | $y_9$                      |
| 171.1               | ST-H <sub>2</sub> O                       | 315.1                  | STGS-H <sub>2</sub> O                     | 538.2 | vV                        | 842.4               | vVSTGS-28                         | 1249.5 | $b_9$ -H <sub>2</sub> O    |
| 173.1               | SL-28                                     | 315.1                  | TGSS-H <sub>2</sub> O                     | 558.2 | Fv-28                     | 845.4               | FvVST-28                          | 1267.5 | $b_9$                      |
| 175.1               | SS                                        | 317.2                  | VSTG-28                                   | 586.2 | Fv                        | 848.4               | $b_4$                             | 1352.6 | $a_{10}$                   |
| 175.1               | $y_1$                                     | 317.2                  | GSSL-28                                   | 597.3 | vVS-28                    | 852.3               | vVSTGS-H <sub>2</sub> O           | 1362.6 | $b_{10}$ -H <sub>2</sub> O |
| 179.1 <sup>+2</sup> | $y_3^-$<br>H <sub>2</sub> O <sup>+2</sup> | 327.2                  | VSTG-H <sub>2</sub> O                     | 602.3 | $y_6^-$ -H <sub>2</sub> O | 855.4               | FvVST-H <sub>2</sub> O            | 1373.6 | $y_{10}$ -H <sub>2</sub> O |
| 179.6 <sup>+2</sup> | $y_3^-$<br>NH <sub>3</sub> <sup>+2</sup>  | 327.2                  | GSSL-H <sub>2</sub> O                     | 603.3 | $y_6^-$ -NH <sub>3</sub>  | 870.4               | vVSTGS                            | 1374.6 | $y_{10}$ -NH <sub>3</sub>  |
| 183.1               | SL-H <sub>2</sub> O                       | 333.1                  | STGS                                      | 604.3 | VSTGSSL-28                | 873.4               | FvVST                             | 1380.6 | $b_{10}$                   |

|                     |                                   |                        |                                                              |                     |                                                  |       |                                     |        |                          |
|---------------------|-----------------------------------|------------------------|--------------------------------------------------------------|---------------------|--------------------------------------------------|-------|-------------------------------------|--------|--------------------------|
| 187.1               | <b>VS</b>                         | 333.1                  | <b>TGSS</b>                                                  | 607.2               | <b>vVS-H<sub>2</sub>O</b>                        | 902.4 | <b>FvVSTG-28</b>                    | 1391.7 | <b>y<sub>10</sub></b>    |
| 188.1 <sup>+2</sup> | <b>y<sub>3</sub><sup>+2</sup></b> | 345.2                  | <b>VSTG</b>                                                  | 613.8 <sup>+2</sup> | <b>y<sub>9</sub>-H<sub>2</sub>O<sup>+2</sup></b> | 907.4 | <b>a<sub>5</sub></b>                | 1536.7 | <b>MH-H<sub>2</sub>O</b> |
| 189.1               | <b>ST</b>                         | 345.2                  | <b>GSSL</b>                                                  | 614.3 <sup>+2</sup> | <b>y<sub>9</sub>-NH<sub>3</sub><sup>+2</sup></b> | 912.4 | <b>FvVSTG-H<sub>2</sub>O</b>        | 1537.7 | <b>MH-NH<sub>3</sub></b> |
| 201.1               | <b>SL</b>                         | 345.1825 <sup>+2</sup> | <b>y<sub>7</sub><sup>-</sup>-H<sub>2</sub>O<sup>+2</sup></b> | 614.3               | <b>VSTGSSL-H<sub>2</sub>O</b>                    | 917.4 | <b>b<sub>5</sub>-H<sub>2</sub>O</b> | 1554.7 | <b>MH</b>                |
| 204.1               | <b>GSS-28</b>                     | 345.6745 <sup>+2</sup> | <b>y<sub>7</sub><sup>-</sup>-NH<sub>3</sub><sup>+2</sup></b> | 620.3               | <b>y<sub>6</sub></b>                             | 929.4 | <b>vVSTGSS-28</b>                   |        |                          |
| 214.1               | <b>GSS-H<sub>2</sub>O</b>         | 354.1878 <sup>+2</sup> | <b>y<sub>7</sub><sup>+2</sup></b>                            | 622.8 <sup>+2</sup> | <b>y<sub>9</sub><sup>+2</sup></b>                | 930.4 | <b>FvVSTG</b>                       |        |                          |
| 218.1               | <b>STG-28</b>                     | 357.2                  | <b>y<sub>3</sub><sup>-</sup>-H<sub>2</sub>O</b>              | 625.3               | <b>vVS</b>                                       | 935.4 | <b>b<sub>5</sub></b>                |        |                          |
| 218.1               | <b>TGS-28</b>                     | 358.2                  | <b>y<sub>3</sub>-NH<sub>3</sub></b>                          | 632.3               | <b>VSTGSSL</b>                                   | 939.4 | <b>vVSTGSS-H<sub>2</sub>O</b>       |        |                          |

## DTTFNVER

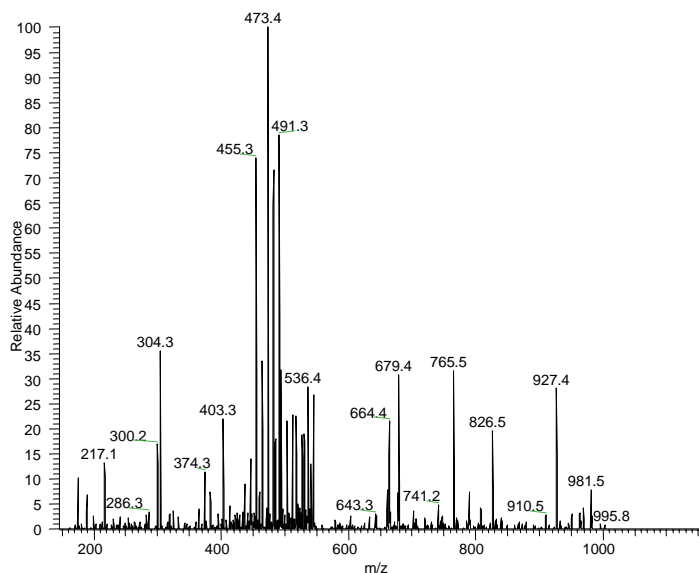

|                    |                                                              |                     |                                     |                     |                                                              |                     |                                       |       |                                     |
|--------------------|--------------------------------------------------------------|---------------------|-------------------------------------|---------------------|--------------------------------------------------------------|---------------------|---------------------------------------|-------|-------------------------------------|
| 70.1               | <b>R</b>                                                     | 202.1 <sup>+2</sup> | <b>y<sub>3</sub><sup>+2</sup></b>   | 386.2               | <b>y<sub>3</sub>-NH<sub>3</sub></b>                          | 525.2               | <b>TFu</b>                            | 741.3 | <b>b<sub>5</sub></b>                |
| 72.1               | <b>V</b>                                                     | 203.1               | <b>TT</b>                           | 396.2               | <b>Fu-28</b>                                                 | 563.3 <sup>+2</sup> | <b>MH-H<sub>2</sub>O<sup>+2</sup></b> | 753.3 | <b>TFuVE</b>                        |
| 74.1               | <b>T</b>                                                     | 211.1               | <b>VE-H<sub>2</sub>O</b>            | 403.2               | <b>y<sub>3</sub></b>                                         | 563.8 <sup>+2</sup> | <b>MH-NH<sub>3</sub><sup>+2</sup></b> | 808.4 | <b>y<sub>5</sub>-H<sub>2</sub>O</b> |
| 79.6 <sup>+2</sup> | <b>y<sub>1</sub><sup>-</sup>-NH<sub>3</sub><sup>+2</sup></b> | 217.1               | <b>b<sub>2</sub></b>                | 404.7 <sup>+2</sup> | <b>y<sub>5</sub><sup>-</sup>-H<sub>2</sub>O<sup>+2</sup></b> | 572.3 <sup>+2</sup> | <b>MH<sup>+2</sup></b>                | 809.4 | <b>y<sub>5</sub>-NH<sub>3</sub></b> |
| 87.1               | <b>R</b>                                                     | 221.1               | <b>TF-28</b>                        | 405.2 <sup>+2</sup> | <b>y<sub>5</sub><sup>-</sup>-NH<sub>3</sub><sup>+2</sup></b> | 596.3               | <b>TFuV-28</b>                        | 812.4 | <b>a<sub>6</sub></b>                |
| 88.0               | <b>D</b>                                                     | 229.1               | <b>VE</b>                           | 413.7 <sup>+2</sup> | <b>y<sub>5</sub><sup>+2</sup></b>                            | 598.3               | <b>TTFu-28</b>                        | 822.4 | <b>b<sub>6</sub>-H<sub>2</sub>O</b> |
| 88.1 <sup>+2</sup> | <b>y<sub>1</sub><sup>+2</sup></b>                            | 231.1               | <b>TF-H<sub>2</sub>O</b>            | 424.2               | <b>Fu</b>                                                    | 606.3               | <b>TFuV-H<sub>2</sub>O</b>            | 826.4 | <b>TTFuVE-28</b>                    |
| 100.1              | <b>R</b>                                                     | 249.1               | <b>TF</b>                           | 437.2               | <b>a<sub>4</sub></b>                                         | 608.3               | <b>TTFu-H<sub>2</sub>O</b>            | 826.4 | <b>y<sub>5</sub></b>                |
| 102.1              | <b>E</b>                                                     | 286.2               | <b>y<sub>2</sub>-H<sub>2</sub>O</b> | 447.2               | <b>b<sub>4</sub>-H<sub>2</sub>O</b>                          | 624.3               | <b>TFuV</b>                           | 836.4 | <b>TTFuVE-H<sub>2</sub>O</b>        |



|                     |                               |                     |                               |                     |                               |       |                          |        |                          |
|---------------------|-------------------------------|---------------------|-------------------------------|---------------------|-------------------------------|-------|--------------------------|--------|--------------------------|
| 112.1               | R                             | 287.1               | $y_2\text{-NH}_3$             | 455.2 <sup>+2</sup> | $y_6\text{-H}_2\text{O}^{+2}$ | 624.3 | FuVE-28                  | 840.4  | $b_6$                    |
| 120.1               | F                             | 290.1               | $a_3$                         | 455.7 <sup>+2</sup> | $y_6\text{-NH}_3^{+2}$        | 626.3 | TTFu                     | 854.4  | TTFuVE                   |
| 143.6 <sup>+2</sup> | $y_2\text{-H}_2\text{O}^{+2}$ | 300.1               | $b_3\text{-H}_2\text{O}$      | 464.2 <sup>+2</sup> | $y_6^{+2}$                    | 634.3 | FuVE-H <sub>2</sub> O    | 909.4  | $y_6\text{-H}_2\text{O}$ |
| 144.1 <sup>+2</sup> | $y_2\text{-NH}_3^{+2}$        | 304.2               | $y_2$                         | 465.2               | $b_4$                         | 652.3 | FuVE                     | 910.4  | $y_6\text{-NH}_3$        |
| 152.6 <sup>+2</sup> | $y_2^{+2}$                    | 318.1               | $b_3$                         | 477.2               | uVE-28                        | 661.3 | $y_4\text{-H}_2\text{O}$ | 927.4  | $y_6$                    |
| 158.1               | $y_1\text{-NH}_3$             | 322.2               | TTF-28                        | 487.2               | uVE-H <sub>2</sub> O          | 662.3 | $y_4\text{-NH}_3$        | 941.4  | $a_7$                    |
| 175.1               | TT-28                         | 331.2 <sup>+2</sup> | $y_4\text{-H}_2\text{O}^{+2}$ | 495.2               | FuV-28                        | 679.3 | $y_4$                    | 951.4  | $b_7\text{-H}_2\text{O}$ |
| 175.1               | $y_1$                         | 331.7 <sup>+2</sup> | $y_4\text{-NH}_3^{+2}$        | 497.2               | TFu-28                        | 697.3 | TTFuV-28                 | 969.4  | $b_7$                    |
| 185.1               | TT-H <sub>2</sub> O           | 332.2               | TTF-H <sub>2</sub> O          | 505.2               | uVE                           | 707.3 | TTFuV-H <sub>2</sub> O   | 1010.5 | $y_7\text{-H}_2\text{O}$ |
| 189.1               | $a_2$                         | 340.2 <sup>+2</sup> | $y_4^{+2}$                    | 505.7 <sup>+2</sup> | $y_7\text{-H}_2\text{O}^{+2}$ | 713.3 | $a_5$                    | 1011.5 | $y_7\text{-NH}_3$        |
| 193.1 <sup>+2</sup> | $y_3\text{-H}_2\text{O}^{+2}$ | 348.2               | uV-28                         | 506.2 <sup>+2</sup> | $y_7\text{-NH}_3^{+2}$        | 723.3 | $b_5\text{-H}_2\text{O}$ | 1028.5 | $y_7$                    |
| 193.6 <sup>+2</sup> | $y_3\text{-NH}_3^{+2}$        | 350.2               | TTF                           | 507.2               | TFu-H <sub>2</sub> O          | 725.3 | TTFuV                    | 1125.5 | MH-H <sub>2</sub> O      |
| 199.1               | $b_2\text{-H}_2\text{O}$      | 376.2               | uV                            | 514.8 <sup>+2</sup> | $y_7^{+2}$                    | 725.3 | TFuVE-28                 | 1126.5 | MH-NH <sub>3</sub>       |
| 201.1               | VE-28                         | 385.2               | $y_3\text{-H}_2\text{O}$      | 523.2               | FuV                           | 735.3 | TFuVE-H <sub>2</sub> O   | 1143.5 | MH                       |

## DLTLNATGGNITLLQVEGTDGMIGK MS/MS on C13 isotope

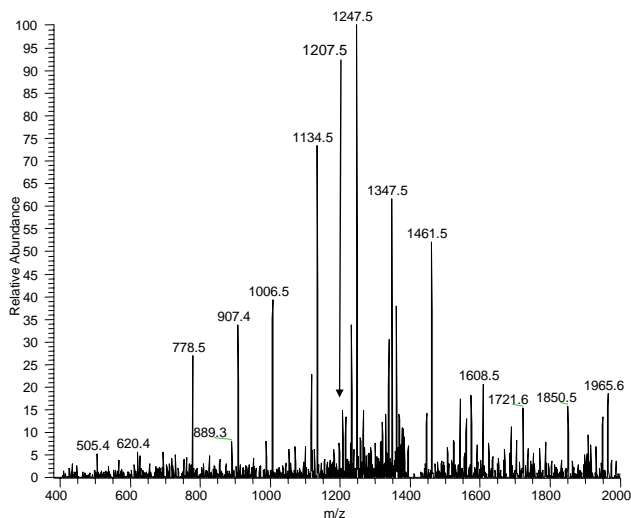

|                    |                        |                     |                                  |       |                                   |                      |                           |        |                                |
|--------------------|------------------------|---------------------|----------------------------------|-------|-----------------------------------|----------------------|---------------------------|--------|--------------------------------|
| 65.6 <sup>+2</sup> | $y_1\text{-NH}_3^{+2}$ | 494.7 <sup>+2</sup> | $y_{10}\text{-H}_2\text{O}^{+2}$ | 838.4 | LLQVE<br>GTD-<br>H <sub>2</sub> O | 1255.1 <sup>+2</sup> | $y_{22}\text{-NH}_3^{+2}$ | 1777.9 | LuATG<br>GuITLL<br>QVEG-<br>28 |
|--------------------|------------------------|---------------------|----------------------------------|-------|-----------------------------------|----------------------|---------------------------|--------|--------------------------------|

|                     |                                                  |                     |                                                               |       |                                           |                      |                                             |        |                                                        |
|---------------------|--------------------------------------------------|---------------------|---------------------------------------------------------------|-------|-------------------------------------------|----------------------|---------------------------------------------|--------|--------------------------------------------------------|
| 72.1                | <b>V</b>                                         | 495.2 <sup>+2</sup> | <b>y<sub>10</sub><sup>-</sup>-NH<sub>3</sub><sup>+2</sup></b> | 839.3 | <b>uATGG<br/>u</b>                        | 1258.6               | <b>ITLLQV<br/>EGTDG<br/>M</b>               | 1787.9 | <b>LuATG<br/>GuITLL<br/>QVEG-<br/>H<sub>2</sub>O</b>   |
| 74.1                | <b>T</b>                                         | 497.2               | <b>QVEGT-<br/>H<sub>2</sub>O</b>                              | 839.4 | <b>LLQVE<br/>GTD-<br/>NH<sub>3</sub></b>  | 1258.6               | <b>TLLQVE<br/>GTDGM<br/>I</b>               | 1788.9 | <b>LuATG<br/>GuITLL<br/>QVEG-<br/>NH<sub>3</sub></b>   |
| 74.1 <sup>+2</sup>  | <b>y<sub>1</sub><sup>+2</sup></b>                | 498.2               | <b>QVEGT-<br/>NH<sub>3</sub></b>                              | 842.4 | <b>VEGTD<br/>GMIG-<br/>H<sub>2</sub>O</b> | 1260.7               | <b>TGGuIT<br/>LLQVE-<br/>28</b>             | 1790.9 | <b>GGuITL<br/>LQVEG<br/>TDGMI<br/>G-28</b>             |
| 84.1                | <b>Q</b>                                         | 499.3               | <b>LQVEG-<br/>28</b>                                          | 842.5 | <b>TLLQVE<br/>GT</b>                      | 1260.7               | <b>GuITLL<br/>QVEGT-<br/>28</b>             | 1792.9 | <b>ATGGuI<br/>TLLQVE<br/>GTDGM<br/>-28</b>             |
| 84.1                | <b>K</b>                                         | 500.2               | <b>TDGMI-<br/>H<sub>2</sub>O</b>                              | 845.5 | <b>uITLLQ</b>                             | 1261.6               | <b>LuATG<br/>GuITL-<br/>H<sub>2</sub>O</b>  | 1793.9 | <b>uATGG<br/>uITLLQ<br/>VEGT</b>                       |
| 86.1                | <b>L</b>                                         | 502.2               | <b>VEGTD</b>                                                  | 854.5 | <b>ITLLQV<br/>EG</b>                      | 1261.6               | <b>uATGG<br/>uITLL-<br/>H<sub>2</sub>O</b>  | 1800.9 | <b>GGuITL<br/>LQVEG<br/>TDGMI<br/>G-H<sub>2</sub>O</b> |
| 86.1                | <b>I</b>                                         | 503.8 <sup>+2</sup> | <b>y<sub>10</sub><sup>+2</sup></b>                            | 856.4 | <b>LLQVE<br/>GTD</b>                      | 1261.6               | <b>LTLuAT<br/>GGuI-<br/>H<sub>2</sub>O</b>  | 1801.9 | <b>GGuITL<br/>LQVEG<br/>TDGMI<br/>G-NH<sub>3</sub></b> |
| 87.1                | <b>GG-28</b>                                     | 504.2               | <b>GGuI</b>                                                   | 860.4 | <b>VEGTD<br/>GMIG</b>                     | 1263.6               | <b>b<sub>10</sub>-H<sub>2</sub>O</b>        | 1802.8 | <b>ATGGuI<br/>TLLQVE<br/>GTDGM<br/>-H<sub>2</sub>O</b> |
| 88.0                | <b>D</b>                                         | 505.3               | <b>y<sub>5</sub></b>                                          | 862.5 | <b>ATGGuI<br/>TL-28</b>                   | 1263.6 <sup>+2</sup> | <b>y<sub>22</sub><sup>+2</sup></b>          | 1803.8 | <b>ATGGuI<br/>TLLQVE<br/>GTDGM<br/>-NH<sub>3</sub></b> |
| 94.1 <sup>+2</sup>  | <b>y<sub>2</sub>-NH<sub>3</sub><sup>+2</sup></b> | 506.2               | <b>uATG</b>                                                   | 862.5 | <b>LTLuAT<br/>GG-28</b>                   | 1267.6               | <b>TLuATG<br/>GuIT</b>                      | 1804.9 | <b>a<sub>15</sub>-NH<sub>3</sub></b>                   |
| 101.1               | <b>Q</b>                                         | 509.3               | <b>LQVEG-<br/>H<sub>2</sub>O</b>                              | 863.4 | <b>a<sub>7</sub></b>                      | 1270.7               | <b>TGGuIT<br/>LLQVE-<br/>H<sub>2</sub>O</b> | 1805.9 | <b>LuATG<br/>GuITLL<br/>QVEG</b>                       |
| 101.1               | <b>K</b>                                         | 510.3               | <b>LQVEG-<br/>NH<sub>3</sub></b>                              | 872.4 | <b>ATGGuI<br/>TL-H<sub>2</sub>O</b>       | 1270.7               | <b>GuITLL<br/>QVEGT-<br/>H<sub>2</sub>O</b> | 1806.0 | <b>LTLuAT<br/>GGuITL<br/>LQV-28</b>                    |
| 102.1               | <b>E</b>                                         | 515.2               | <b>QVEGT</b>                                                  | 872.4 | <b>LTLuAT<br/>GG-H<sub>2</sub>O</b>       | 1271.6               | <b>GuITLL<br/>QVEGT-<br/>NH<sub>3</sub></b> | 1816.0 | <b>LTLuAT<br/>GGuITL<br/>LQV-<br/>H<sub>2</sub>O</b>   |
| 102.6 <sup>+2</sup> | <b>y<sub>2</sub><sup>+2</sup></b>                | 518.2               | <b>TDGMI</b>                                                  | 873.4 | <b>b<sub>7</sub>-H<sub>2</sub>O</b>       | 1271.6               | <b>TGGuIT<br/>LLQVE-<br/>NH<sub>3</sub></b> | 1816.9 | <b>LTLuAT<br/>GGuITL<br/>LQV-<br/>NH<sub>3</sub></b>   |
| 104.1               | <b>M</b>                                         | 520.3               | <b>GuIT-28</b>                                                | 874.5 | <b>GuITLL<br/>Q-28</b>                    | 1279.6               | <b>uATGG<br/>uITLL</b>                      | 1818.9 | <b>GGuITL<br/>LQVEG<br/>TDGMI<br/>G</b>                |
| 115.1               | <b>GG</b>                                        | 527.3               | <b>LQVEG</b>                                                  | 884.5 | <b>GuITLL<br/>Q-H<sub>2</sub>O</b>        | 1279.6               | <b>LuATG<br/>GuITL</b>                      | 1820.9 | <b>ATGGuI<br/>TLLQVE<br/>GTDGM</b>                     |

|                     |                                                  |       |                               |       |                                     |                      |                                                               |        |                                            |
|---------------------|--------------------------------------------------|-------|-------------------------------|-------|-------------------------------------|----------------------|---------------------------------------------------------------|--------|--------------------------------------------|
| 126.1               | <b>K</b>                                         | 527.4 | <b>TLLQV-28</b>               | 885.5 | <b>GuITLL Q-NH<sub>3</sub></b>      | 1279.6               | <b>LTLuAT GGul</b>                                            | 1821.9 | <b>TLuATG GuITLL QVE-28</b>                |
| 129.1               | <b>Q</b>                                         | 530.2 | <b>GuIT-H<sub>2</sub>O</b>    | 885.5 | <b>LLQVE GTDG-28</b>                | 1281.6               | <b>b<sub>10</sub></b>                                         | 1821.9 | <b>a<sub>15</sub></b>                      |
| 129.1               | <b>K</b>                                         | 531.2 | <b>VEGTD G-28</b>             | 889.4 | <b>y<sub>9</sub>-H<sub>2</sub>O</b> | 1287.7               | <b>TLLQVE GTDGM IG-28</b>                                     | 1831.9 | <b>TLuATG GuITLL QVE-H<sub>2</sub>O</b>    |
| 130.1               | <b>y<sub>1</sub>-NH<sub>3</sub></b>              | 534.3 | <b>LuAT-28</b>                | 890.4 | <b>y<sub>9</sub>-NH<sub>3</sub></b> | 1288.7               | <b>GuITLL QVEGT</b>                                           | 1831.9 | <b>b<sub>15</sub>-H<sub>2</sub>O</b>       |
| 131.1               | <b>GT-28</b>                                     | 534.3 | <b>TLuA-28</b>                | 890.4 | <b>ATGGul TL</b>                    | 1288.7               | <b>TGGuIT LLQVE</b>                                           | 1832.9 | <b>TLuATG GuITLL QVE-NH<sub>3</sub></b>    |
| 131.1               | <b>TG-28</b>                                     | 535.2 | <b>uATGG-28</b>               | 890.4 | <b>LTLuAT GG</b>                    | 1297.6               | <b>TLLQVE GTDGM IG-H<sub>2</sub>O</b>                         | 1832.9 | <b>b<sub>15</sub>-NH<sub>3</sub></b>       |
| 141.1               | <b>GT-H<sub>2</sub>O</b>                         | 535.2 | <b>ATGGu-28</b>               | 891.4 | <b>b<sub>7</sub></b>                | 1298.6               | <b>TLLQVE GTDGM IG-NH<sub>3</sub></b>                         | 1832.9 | <b>y<sub>16</sub>-H<sub>2</sub>O</b>       |
| 141.1               | <b>TG-H<sub>2</sub>O</b>                         | 537.3 | <b>TLLQV-H<sub>2</sub>O</b>   | 895.5 | <b>LLQVE GTDG-H<sub>2</sub>O</b>    | 1305.2 <sup>+2</sup> | <b>y<sub>23</sub><sup>-</sup> H<sub>2</sub>O<sup>+2</sup></b> | 1833.9 | <b>y<sub>16</sub>-NH<sub>3</sub></b>       |
| 143.1               | <b>IG-28</b>                                     | 538.3 | <b>TLLQV-NH<sub>3</sub></b>   | 896.4 | <b>LLQVE GTDG-NH<sub>3</sub></b>    | 1305.6 <sup>+2</sup> | <b>y<sub>23</sub><sup>-</sup> NH<sub>3</sub><sup>+2</sup></b> | 1834.0 | <b>LTLuAT GGulTL LQV</b>                   |
| 145.1               | <b>DG-28</b>                                     | 541.2 | <b>VEGTD G-H<sub>2</sub>O</b> | 902.5 | <b>GuITLL Q</b>                     | 1314.2 <sup>+2</sup> | <b>y<sub>23</sub><sup>+2</sup></b>                            | 1834.9 | <b>TGGuIT LLQVE GTDGM I-28</b>             |
| 145.1               | <b>AT-28</b>                                     | 541.4 | <b>ITLLQ-28</b>               | 903.4 | <b>QVEGT DGMI-28</b>                | 1315.7               | <b>TLLQVE GTDGM IG</b>                                        | 1844.9 | <b>TGGuIT LLQVE GTDGM I-H<sub>2</sub>O</b> |
| 147.1               | <b>y<sub>1</sub></b>                             | 544.3 | <b>TLuA-H<sub>2</sub>O</b>    | 903.4 | <b>LQVEG TDGM-28</b>                | 1317.7               | <b>TGGuIT LLQVE G-28</b>                                      | 1845.9 | <b>TGGuIT LLQVE GTDGM I-NH<sub>3</sub></b> |
| 150.6 <sup>+2</sup> | <b>y<sub>3</sub>-NH<sub>3</sub><sup>+2</sup></b> | 544.3 | <b>LuAT-H<sub>2</sub>O</b>    | 904.5 | <b>TGGuIT LL-28</b>                 | 1317.7               | <b>GGuITL LQVEG T-28</b>                                      | 1849.9 | <b>TLuATG GuITLL QVE</b>                   |
| 155.0               | <b>DG-H<sub>2</sub>O</b>                         | 545.2 | <b>uATGG-H<sub>2</sub>O</b>   | 907.4 | <b>y<sub>9</sub></b>                | 1318.7               | <b>uITLLQ VEGTD-28</b>                                        | 1849.9 | <b>b<sub>15</sub></b>                      |
| 155.1               | <b>AT-H<sub>2</sub>O</b>                         | 545.2 | <b>ATGGu-H<sub>2</sub>O</b>   | 913.4 | <b>QVEGT DGMI-H<sub>2</sub>O</b>    | 1327.7               | <b>TGGuIT LLQVE G-H<sub>2</sub>O</b>                          | 1850.9 | <b>y<sub>16</sub></b>                      |
| 159.1               | <b>GT</b>                                        | 547.3 | <b>TDGMI G-28</b>             | 913.4 | <b>LQVEG TDGM-H<sub>2</sub>O</b>    | 1327.7               | <b>GGuITL LQVEG T-H<sub>2</sub>O</b>                          | 1862.9 | <b>TGGuIT LLQVE GTDGM I</b>                |
| 159.1               | <b>EG-28</b>                                     | 547.3 | <b>GTDGM I-28</b>             | 913.5 | <b>LLQVE GTDG</b>                   | 1328.7               | <b>TGGuIT LLQVE G-NH<sub>3</sub></b>                          | 1879.0 | <b>TLuATG GuITLL QVEG-28</b>               |

|                     |                                     |                     |                                                                   |                     |                                                                   |        |                                               |        |                                                         |
|---------------------|-------------------------------------|---------------------|-------------------------------------------------------------------|---------------------|-------------------------------------------------------------------|--------|-----------------------------------------------|--------|---------------------------------------------------------|
| 159.1               | <b>TG</b>                           | 548.3               | <b>GuIT</b>                                                       | 914.4               | <b>QVEGT<br/>DGMI-<br/>NH<sub>3</sub></b>                         | 1328.7 | <b>GGuITL<br/>LQVEG<br/>T-NH<sub>3</sub></b>  | 1879.0 | <b>LuATG<br/>GuITLL<br/>QVEGT-<br/>28</b>               |
| 159.1 <sup>+2</sup> | <b>y<sub>3</sub><sup>+2</sup></b>   | 551.4               | <b>ITLLQ-<br/>H<sub>2</sub>O</b>                                  | 914.4               | <b>LQVEG<br/>TDGM-<br/>NH<sub>3</sub></b>                         | 1328.7 | <b>uITLLQ<br/>VEGTD-<br/>H<sub>2</sub>O</b>   | 1880.9 | <b>uATGG<br/>uITLLQ<br/>VEGTD-<br/>28</b>               |
| 161.1               | <b>GM-28</b>                        | 552.3               | <b>ITLLQ-<br/>NH<sub>3</sub></b>                                  | 914.5               | <b>TGGuIT<br/>LL-H<sub>2</sub>O</b>                               | 1329.6 | <b>uITLLQ<br/>VEGTD-<br/>NH<sub>3</sub></b>   | 1888.9 | <b>LuATG<br/>GuITLL<br/>QVEGT-<br/>H<sub>2</sub>O</b>   |
| 169.1               | <b>EG-H<sub>2</sub>O</b>            | 555.4               | <b>LLQVE-<br/>28</b>                                              | 916.5               | <b>uITLLQ<br/>V-28</b>                                            | 1331.7 | <b>ATGGuI<br/>TLLQVE<br/>-28</b>              | 1888.9 | <b>TLuATG<br/>GuITLL<br/>QVEG-<br/>H<sub>2</sub>O</b>   |
| 171.1               | <b>IG</b>                           | 555.4               | <b>TLLQV</b>                                                      | 917.0 <sup>+2</sup> | <b>y<sub>16</sub><sup>-</sup><br/>H<sub>2</sub>O<sup>+2</sup></b> | 1341.7 | <b>ATGGuI<br/>TLLQVE<br/>-H<sub>2</sub>O</b>  | 1889.9 | <b>LuATG<br/>GuITLL<br/>QVEGT-<br/>NH<sub>3</sub></b>   |
| 173.1               | <b>DG</b>                           | 557.2               | <b>GTDGM<br/>I-H<sub>2</sub>O</b>                                 | 917.5 <sup>+2</sup> | <b>y<sub>16</sub><sup>-</sup><br/>NH<sub>3</sub><sup>+2</sup></b> | 1342.7 | <b>ATGGuI<br/>TLLQVE<br/>-NH<sub>3</sub></b>  | 1889.9 | <b>TLuATG<br/>GuITLL<br/>QVEG-<br/>NH<sub>3</sub></b>   |
| 173.1               | <b>AT</b>                           | 557.2               | <b>TDGMI<br/>G-H<sub>2</sub>O</b>                                 | 920.5               | <b>a<sub>8</sub></b>                                              | 1342.7 | <b>y<sub>13</sub>-H<sub>2</sub>O</b>          | 1890.0 | <b>y<sub>17</sub>-H<sub>2</sub>O</b>                    |
| 187.1               | <b>EG</b>                           | 558.8 <sup>+2</sup> | <b>y<sub>11</sub><sup>-</sup><br/>H<sub>2</sub>O<sup>+2</sup></b> | 924.4               | <b>uATGG<br/>ul-28</b>                                            | 1343.7 | <b>y<sub>13</sub>-NH<sub>3</sub></b>          | 1890.9 | <b>uATGG<br/>uITLLQ<br/>VEGTD-<br/>H<sub>2</sub>O</b>   |
| 187.1               | <b>y<sub>2</sub>-NH<sub>3</sub></b> | 559.2               | <b>VEGTD<br/>G</b>                                                | 924.4               | <b>LuATG<br/>Gu-28</b>                                            | 1343.7 | <b>ITLLQV<br/>EGTDG<br/>MI-28</b>             | 1890.9 | <b>y<sub>17</sub>-NH<sub>3</sub></b>                    |
| 187.1               | <b>IT-28</b>                        | 559.3 <sup>+2</sup> | <b>y<sub>11</sub><sup>-</sup><br/>NH<sub>3</sub><sup>+2</sup></b> | 926.0 <sup>+2</sup> | <b>y<sub>16</sub><sup>+2</sup></b>                                | 1345.7 | <b>GGuITL<br/>LQVEG<br/>T</b>                 | 1891.9 | <b>uATGG<br/>uITLLQ<br/>VEGTD-<br/>NH<sub>3</sub></b>   |
| 187.1               | <b>TL-28</b>                        | 562.3               | <b>LuAT</b>                                                       | 926.5               | <b>uITLLQ<br/>V-H<sub>2</sub>O</b>                                | 1345.7 | <b>TGGuIT<br/>LLQVE<br/>G</b>                 | 1891.9 | <b>TGGuIT<br/>LLQVE<br/>GTDGM<br/>IG-28</b>             |
| 187.1               | <b>LT-28</b>                        | 562.3               | <b>TLuA</b>                                                       | 927.5               | <b>uITLLQ<br/>V-NH<sub>3</sub></b>                                | 1346.7 | <b>uITLLQ<br/>VEGTD</b>                       | 1901.9 | <b>TGGuIT<br/>LLQVE<br/>GTDGM<br/>IG-H<sub>2</sub>O</b> |
| 188.1               | <b>TGG-28</b>                       | 563.2               | <b>EGTDG<br/>M-28</b>                                             | 927.6               | <b>ITLLQV<br/>EGT-28</b>                                          | 1352.7 | <b>TLuATG<br/>GuITL-<br/>28</b>               | 1902.9 | <b>TGGuIT<br/>LLQVE<br/>GTDGM<br/>IG-NH<sub>3</sub></b> |
| 189.1               | <b>GM</b>                           | 563.2               | <b>ATGGu</b>                                                      | 929.5               | <b>TLLQVE<br/>GTD-28</b>                                          | 1352.7 | <b>LTLuAT<br/>GGuIT-<br/>28</b>               | 1904.0 | <b>a<sub>16</sub>-NH<sub>3</sub></b>                    |
| 189.1               | <b>TD-28</b>                        | 563.2               | <b>uATGG</b>                                                      | 930.4               | <b>b<sub>8</sub>-H<sub>2</sub>O</b>                               | 1353.7 | <b>ITLLQV<br/>EGTDG<br/>MI-H<sub>2</sub>O</b> | 1905.9 | <b>ATGGuI<br/>TLLQVE<br/>GTDGM<br/>I-28</b>             |

|       |                                     |                     |                                    |                        |                                                               |                      |                                                               |        |                                            |
|-------|-------------------------------------|---------------------|------------------------------------|------------------------|---------------------------------------------------------------|----------------------|---------------------------------------------------------------|--------|--------------------------------------------|
| 197.1 | <b>IT-H<sub>2</sub>O</b>            | 565.3               | <b>LLQVE-H<sub>2</sub>O</b>        | 931.4                  | <b>LQVEG TDGM</b>                                             | 1354.7               | <b>ITLLQV EGTDG MI-NH<sub>3</sub></b>                         | 1906.9 | <b>LuATG GuITLL QVEGT</b>                  |
| 197.1 | <b>LT-H<sub>2</sub>O</b>            | 566.3               | <b>LLQVE-NH<sub>3</sub></b>        | 931.4                  | <b>QVEGT DGMI</b>                                             | 1359.7               | <b>ATGGuITLLQVE</b>                                           | 1906.9 | <b>TLuATG GuITLL QVEG</b>                  |
| 197.1 | <b>TL-H<sub>2</sub>O</b>            | 567.8 <sup>+2</sup> | <b>y<sub>11</sub><sup>+2</sup></b> | 931.5                  | <b>GGuITL LQ-28</b>                                           | 1360.7               | <b>y<sub>13</sub></b>                                         | 1908.0 | <b>y<sub>17</sub></b>                      |
| 198.1 | <b>TGG-H<sub>2</sub>O</b>           | 569.4               | <b>ITLLQ</b>                       | 932.5                  | <b>TGGuITLL</b>                                               | 1361.7 <sup>+2</sup> | <b>y<sub>24</sub><sup>-</sup> H<sub>2</sub>O<sup>+2</sup></b> | 1908.9 | <b>uATGG uITLLQ VEGTD</b>                  |
| 199.1 | <b>TD-H<sub>2</sub>O</b>            | 573.2               | <b>EGTDG M-H<sub>2</sub>O</b>      | 934.4                  | <b>uATGG ul-H<sub>2</sub>O</b>                                | 1362.2 <sup>+2</sup> | <b>y<sub>24</sub><sup>-</sup> NH<sub>3</sub><sup>+2</sup></b> | 1915.9 | <b>ATGGuITLLQVE GTDGM I-H<sub>2</sub>O</b> |
| 199.2 | <b>LL-28</b>                        | 575.2               | <b>GTDGM I</b>                     | 934.4                  | <b>LuATG Gu-H<sub>2</sub>O</b>                                | 1362.7               | <b>TLuATG GuITL-H<sub>2</sub>O</b>                            | 1916.9 | <b>ATGGuITLLQVE GTDGM I-NH<sub>3</sub></b> |
| 200.1 | <b>QV-28</b>                        | 575.2               | <b>TDGMI G</b>                     | 937.5                  | <b>ITLLQV EGT-H<sub>2</sub>O</b>                              | 1362.7               | <b>LTLuATGGuIT-H<sub>2</sub>O</b>                             | 1919.9 | <b>TGGuITLLQVE GTDGM IG</b>                |
| 201.1 | <b>VE-28</b>                        | 576.3               | <b>uITL-28</b>                     | 938.5                  | <b>ITLLQV EGT-NH<sub>3</sub></b>                              | 1364.7               | <b>LuATG GuITLL-28</b>                                        | 1921.0 | <b>a<sub>16</sub></b>                      |
| 201.1 | <b>a<sub>2</sub></b>                | 576.3               | <b>LTLu-28</b>                     | 939.5                  | <b>TLLQVE GTD-H<sub>2</sub>O</b>                              | 1366.7               | <b>a<sub>11</sub></b>                                         | 1931.0 | <b>b<sub>16</sub>-H<sub>2</sub>O</b>       |
| 202.1 | <b>ATG-28</b>                       | 577.3               | <b>GGuIT-28</b>                    | 940.5                  | <b>TLLQVE GTD-NH<sub>3</sub></b>                              | 1370.7 <sup>+2</sup> | <b>y<sub>24</sub><sup>+2</sup></b>                            | 1932.0 | <b>b<sub>16</sub>-NH<sub>3</sub></b>       |
| 204.1 | <b>y<sub>2</sub></b>                | 577.3               | <b>TGGuIT-28</b>                   | 941.5                  | <b>GGuITL LQ-H<sub>2</sub>O</b>                               | 1371.7               | <b>ITLLQV EGTDG MI</b>                                        | 1933.9 | <b>ATGGuITLLQVE GTDGM I</b>                |
| 211.1 | <b>VE-H<sub>2</sub>O</b>            | 583.3               | <b>LLQVE</b>                       | 942.5                  | <b>GGuITL LQ-NH<sub>3</sub></b>                               | 1374.7               | <b>LuATG GuITLL-H<sub>2</sub>O</b>                            | 1935.0 | <b>LTLuATGGuITL LQVE-28</b>                |
| 211.1 | <b>b<sub>2</sub>-H<sub>2</sub>O</b> | 586.3               | <b>uITL-H<sub>2</sub>O</b>         | 944.5                  | <b>uITLLQ V</b>                                               | 1375.7               | <b>GuITLL QVEGT D-28</b>                                      | 1937.9 | <b>uATGG uITLLQ VEGTD G-28</b>             |
| 211.1 | <b>QV-NH<sub>3</sub></b>            | 586.3               | <b>LTLu-H<sub>2</sub>O</b>         | 945.479 <sup>g+2</sup> | <b>y<sub>17</sub><sup>-</sup> H<sub>2</sub>O<sup>+2</sup></b> | 1375.7               | <b>uITLLQ VEGTD G-28</b>                                      | 1945.0 | <b>LTLuATGGuITL LQVE-H<sub>2</sub>O</b>    |
| 212.1 | <b>ATG-H<sub>2</sub>O</b>           | 587.3               | <b>GGuIT-H<sub>2</sub>O</b>        | 945.971 <sup>g+2</sup> | <b>y<sub>17</sub><sup>-</sup> NH<sub>3</sub><sup>+2</sup></b> | 1376.6               | <b>b<sub>11</sub>-H<sub>2</sub>O</b>                          | 1946.0 | <b>LTLuATGGuITL LQVE-NH<sub>3</sub></b>    |
| 214.2 | <b>LQ-28</b>                        | 587.3               | <b>TGGuIT-H<sub>2</sub>O</b>       | 948.5                  | <b>b<sub>8</sub></b>                                          | 1379.7               | <b>uATGG uITLLQ-28</b>                                        | 1947.0 | <b>y<sub>18</sub>-H<sub>2</sub>O</b>       |
| 215.1 | <b>IT</b>                           | 591.2               | <b>EGTDG M</b>                     | 952.4                  | <b>uATGG ul</b>                                               | 1380.7               | <b>TLuATG GuITL</b>                                           | 1947.9 | <b>uATGG uITLLQ VEGTD G-H<sub>2</sub>O</b> |

|                            |                                                  |       |                                     |                     |                                                   |        |                                       |        |                                              |
|----------------------------|--------------------------------------------------|-------|-------------------------------------|---------------------|---------------------------------------------------|--------|---------------------------------------|--------|----------------------------------------------|
| 215.1                      | <b>TL</b>                                        | 591.3 | <b>LuATG-28</b>                     | 952.4               | <b>LuATG Gu</b>                                   | 1380.7 | <b>LTLuAT GGuIT</b>                   | 1948.0 | <b>y<sub>18</sub>-NH<sub>3</sub></b>         |
| 215.1                      | <b>LT</b>                                        | 600.3 | <b>LQVEG T-28</b>                   | 954.5 <sup>+2</sup> | <b>y<sub>17</sub><sup>+2</sup></b>                | 1385.7 | <b>GuITLL QVEGT D-H<sub>2</sub>O</b>  | 1948.9 | <b>uATGG uITLLQ VEGTD G-NH<sub>3</sub></b>   |
| 216.1                      | <b>TGG</b>                                       | 601.3 | <b>LuATG-H<sub>2</sub>O</b>         | 955.5               | <b>ITLLQV EGT</b>                                 | 1385.7 | <b>uITLLQ VEGTD G-H<sub>2</sub>O</b>  | 1949.0 | <b>b<sub>16</sub></b>                        |
| 216.119<br>8 <sup>+2</sup> | <b>y<sub>4</sub>-NH<sub>3</sub><sup>+2</sup></b> | 602.3 | <b>QVEGT D-28</b>                   | 957.5               | <b>TLLQVE GTD</b>                                 | 1386.7 | <b>GuITLL QVEGT D-NH<sub>3</sub></b>  | 1963.0 | <b>ATGGuI TLLQVE GTDGM IG-28</b>             |
| 217.1                      | <b>TD</b>                                        | 602.3 | <b>y<sub>6</sub>-H<sub>2</sub>O</b> | 959.5               | <b>GGuITL LQ</b>                                  | 1386.7 | <b>uITLLQ VEGTD G-NH<sub>3</sub></b>  | 1963.0 | <b>LTLuAT GGuITL LQVE</b>                    |
| 217.1                      | <b>MI-28</b>                                     | 603.3 | <b>y<sub>6</sub>-NH<sub>3</sub></b> | 960.4               | <b>QVEGT DGMIG-28</b>                             | 1388.7 | <b>ATGGuI TLLQVE G-28</b>             | 1965.0 | <b>y<sub>18</sub></b>                        |
| 224.6 <sup>+2</sup>        | <b>y<sub>4</sub><sup>+2</sup></b>                | 604.3 | <b>GTDGM IG-28</b>                  | 970.4               | <b>QVEGT DGMIG-H<sub>2</sub>O</b>                 | 1389.7 | <b>uATGG uITLLQ-H<sub>2</sub>O</b>    | 1965.9 | <b>uATGG uITLLQ VEGTD G</b>                  |
| 225.1                      | <b>LQ-NH<sub>3</sub></b>                         | 604.3 | <b>uITL</b>                         | 971.4               | <b>QVEGT DGMIG-NH<sub>3</sub></b>                 | 1390.7 | <b>uATGG uITLLQ-NH<sub>3</sub></b>    | 1973.0 | <b>ATGGuI TLLQVE GTDGM IG-H<sub>2</sub>O</b> |
| 227.2                      | <b>LL</b>                                        | 604.3 | <b>LTLu</b>                         | 973.6               | <b>GuITLL QV-28</b>                               | 1392.7 | <b>LuATG GuITLL</b>                   | 1973.9 | <b>ATGGuI TLLQVE GTDGM IG-NH<sub>3</sub></b> |
| 228.1                      | <b>QV</b>                                        | 605.3 | <b>GGuIT</b>                        | 974.0 <sup>+2</sup> | <b>y<sub>18</sub>-H<sub>2</sub>O<sup>+2</sup></b> | 1394.7 | <b>b<sub>11</sub></b>                 | 1980.0 | <b>TLuATG GuITLL QVEGT-28</b>                |
| 229.1                      | <b>VE</b>                                        | 605.3 | <b>TGGuI</b>                        | 974.5 <sup>+2</sup> | <b>y<sub>18</sub>-NH<sub>3</sub><sup>+2</sup></b> | 1398.7 | <b>ATGGuI TLLQVE G-H<sub>2</sub>O</b> | 1990.0 | <b>TLuATG GuITLL QVEGT-H<sub>2</sub>O</b>    |
| 229.1                      | <b>b<sub>2</sub></b>                             | 610.3 | <b>LQVEG T-H<sub>2</sub>O</b>       | 975.5               | <b>ATGGuI TLL-28</b>                              | 1399.7 | <b>ATGGuI TLLQVE G-NH<sub>3</sub></b> | 1991.0 | <b>ATGGuI TLLQVE GTDGM IG</b>                |
| 230.1                      | <b>ATG</b>                                       | 611.3 | <b>LQVEG T-NH<sub>3</sub></b>       | 977.5               | <b>a<sub>9</sub></b>                              | 1400.7 | <b>ITLLQV EGTDG MIG-28</b>            | 1991.0 | <b>TLuATG GuITLL QVEGT-NH<sub>3</sub></b>    |
| 242.1                      | <b>LQ</b>                                        | 612.3 | <b>QVEGT D-H<sub>2</sub>O</b>       | 983.0 <sup>+2</sup> | <b>y<sub>18</sub><sup>+2</sup></b>                | 1403.7 | <b>GuITLL QVEGT D</b>                 | 1992.0 | <b>LTLuAT GGuITL LQVEG-28</b>                |
| 244.6 <sup>+2</sup>        | <b>y<sub>5</sub>-NH<sub>3</sub><sup>+2</sup></b> | 612.4 | <b>LLQVE G-28</b>                   | 983.5               | <b>GuITLL QV-H<sub>2</sub>O</b>                   | 1403.7 | <b>uITLLQ VEGTD G</b>                 | 1994.0 | <b>LuATG GuITLL QVEGT D-28</b>               |

|                     |                                   |                     |                                                                   |        |                                            |                      |                                                     |        |                                                         |
|---------------------|-----------------------------------|---------------------|-------------------------------------------------------------------|--------|--------------------------------------------|----------------------|-----------------------------------------------------|--------|---------------------------------------------------------|
| 245.1               | <b>MI</b>                         | 613.2               | <b>QVEGT<br/>D-NH<sub>3</sub></b>                                 | 984.5  | <b>GuITLL<br/>QV-NH<sub>3</sub></b>        | 1407.7               | <b>uATGG<br/>uITLLQ</b>                             | 2002.0 | <b>LTLuAT<br/>GGuITL<br/>LQVEG-<br/>H<sub>2</sub>O</b>  |
| 246.1               | <b>TDG-28</b>                     | 614.3               | <b>GTDGM<br/>IG-H<sub>2</sub>O</b>                                | 985.5  | <b>ATGGul<br/>TLL-<br/>H<sub>2</sub>O</b>  | 1410.7               | <b>ITLLQV<br/>EGTDG<br/>MIG-<br/>H<sub>2</sub>O</b> | 2003.0 | <b>LTLuAT<br/>GGuITL<br/>LQVEG-<br/>NH<sub>3</sub></b>  |
| 246.1               | <b>GTD-28</b>                     | 615.3 <sup>+2</sup> | <b>y<sub>12</sub><sup>-</sup><br/>H<sub>2</sub>O<sup>+2</sup></b> | 986.5  | <b>TLLQVE<br/>GTDG-<br/>28</b>             | 1411.7               | <b>ITLLQV<br/>EGTDG<br/>MIG-<br/>NH<sub>3</sub></b> | 2004.0 | <b>LuATG<br/>GuITLL<br/>QVEGT<br/>D-H<sub>2</sub>O</b>  |
| 253.1 <sup>+2</sup> | <b>y<sub>5</sub><sup>+2</sup></b> | 615.8 <sup>+2</sup> | <b>y<sub>12</sub><sup>-</sup><br/>NH<sub>3</sub><sup>+2</sup></b> | 987.5  | <b>b<sub>9</sub>-H<sub>2</sub>O</b>        | 1416.7               | <b>ATGGul<br/>TLLQVE<br/>G</b>                      | 2004.9 | <b>LuATG<br/>GuITLL<br/>QVEGT<br/>D-NH<sub>3</sub></b>  |
| 256.1               | <b>GTD-<br/>H<sub>2</sub>O</b>    | 619.3               | <b>LuATG</b>                                                      | 988.4  | <b>QVEGT<br/>DGMIG</b>                     | 1418.7               | <b>TGGuIT<br/>LLQVE<br/>GT-28</b>                   | 2008.0 | <b>TLuATG<br/>GuITLL<br/>QVEGT</b>                      |
| 256.1               | <b>TDG-<br/>H<sub>2</sub>O</b>    | 620.3               | <b>y<sub>6</sub></b>                                              | 988.5  | <b>y<sub>10</sub>-H<sub>2</sub>O</b>       | 1419.2 <sup>+2</sup> | <b>MH-<br/>H<sub>2</sub>O<sup>+2</sup></b>          | 2020.0 | <b>LTLuAT<br/>GGuITL<br/>LQVEG</b>                      |
| 258.1               | <b>VEG-28</b>                     | 622.4               | <b>LLQVE<br/>G-H<sub>2</sub>O</b>                                 | 989.5  | <b>y<sub>10</sub>-NH<sub>3</sub></b>       | 1419.7 <sup>+2</sup> | <b>MH-<br/>NH<sub>3</sub><sup>+2</sup></b>          | 2022.0 | <b>LuATG<br/>GuITLL<br/>QVEGT<br/>D</b>                 |
| 259.1               | <b>ATGG-<br/>28</b>               | 623.3               | <b>LLQVE<br/>G-NH<sub>3</sub></b>                                 | 996.5  | <b>TLLQVE<br/>GTDG-<br/>H<sub>2</sub>O</b> | 1428.2 <sup>+2</sup> | <b>MH<sup>+2</sup></b>                              | 2033.0 | <b>a<sub>17</sub>-NH<sub>3</sub></b>                    |
| 260.1               | <b>EGT-28</b>                     | 624.3 <sup>+2</sup> | <b>y<sub>12</sub><sup>+2</sup></b>                                | 997.5  | <b>TLLQVE<br/>GTDG-<br/>NH<sub>3</sub></b> | 1428.7               | <b>TGGuIT<br/>LLQVE<br/>GT-H<sub>2</sub>O</b>       | 2048.0 | <b>y<sub>19</sub>-H<sub>2</sub>O</b>                    |
| 268.1               | <b>VEG-<br/>H<sub>2</sub>O</b>    | 628.3               | <b>LQVEG<br/>T</b>                                                | 1001.6 | <b>GuITLL<br/>QV</b>                       | 1428.7               | <b>ITLLQV<br/>EGTDG<br/>MIG</b>                     | 2049.0 | <b>y<sub>19</sub>-NH<sub>3</sub></b>                    |
| 269.1               | <b>ATGG-<br/>H<sub>2</sub>O</b>   | 630.3               | <b>QVEGT<br/>D</b>                                                | 1003.5 | <b>ATGGul<br/>TLL</b>                      | 1429.7               | <b>TGGuIT<br/>LLQVE<br/>GT-NH<sub>3</sub></b>       | 2050.0 | <b>a<sub>17</sub></b>                                   |
| 270.1               | <b>EGT-<br/>H<sub>2</sub>O</b>    | 632.3               | <b>GTDGM<br/>IG</b>                                               | 1005.5 | <b>b<sub>9</sub></b>                       | 1432.7               | <b>GGuITL<br/>LQVEG<br/>TD-28</b>                   | 2051.0 | <b>LuATG<br/>GuITLL<br/>QVEGT<br/>DG-28</b>             |
| 274.1               | <b>TDG</b>                        | 633.3               | <b>GuITL-<br/>28</b>                                              | 1006.5 | <b>y<sub>10</sub></b>                      | 1432.7               | <b>GuITLL<br/>QVEGT<br/>DG-28</b>                   | 2060.0 | <b>b<sub>17</sub>-H<sub>2</sub>O</b>                    |
| 274.1               | <b>GTD</b>                        | 635.3               | <b>TLuAT-<br/>28</b>                                              | 1014.5 | <b>TLLQVE<br/>GTDG</b>                     | 1442.7               | <b>GuITLL<br/>QVEGT<br/>DG-H<sub>2</sub>O</b>       | 2061.0 | <b>LuATG<br/>GuITLL<br/>QVEGT<br/>DG-H<sub>2</sub>O</b> |
| 274.2               | <b>GMI-28</b>                     | 640.4               | <b>LLQVE<br/>G</b>                                                | 1016.5 | <b>LLQVE<br/>GTDGM<br/>-28</b>             | 1442.7               | <b>GGuITL<br/>LQVEG<br/>TD-H<sub>2</sub>O</b>       | 2061.0 | <b>b<sub>17</sub>-NH<sub>3</sub></b>                    |
| 274.2               | <b>MIG-28</b>                     | 640.4               | <b>ITLLQV-<br/>28</b>                                             | 1016.5 | <b>LQVEG<br/>TDGMI-<br/>28</b>             | 1443.7               | <b>GuITLL<br/>QVEGT<br/>DG-NH<sub>3</sub></b>       | 2062.0 | <b>LuATG<br/>GuITLL<br/>QVEGT<br/>DG-NH<sub>3</sub></b> |

|                     |                                                  |       |                                   |                      |                                                   |        |                                               |        |                                                         |
|---------------------|--------------------------------------------------|-------|-----------------------------------|----------------------|---------------------------------------------------|--------|-----------------------------------------------|--------|---------------------------------------------------------|
| 276.1               | <b>DGM-28</b>                                    | 643.3 | <b>GuITL-H<sub>2</sub>O</b>       | 1024.5 <sup>+2</sup> | <b>y<sub>19</sub>-H<sub>2</sub>O<sup>+2</sup></b> | 1443.7 | <b>GGuITL<br/>LQVEG<br/>TD-NH<sub>3</sub></b> | 2066.0 | <b>y<sub>19</sub></b>                                   |
| 286.1               | <b>DGM-H<sub>2</sub>O</b>                        | 645.3 | <b>TLuAT-H<sub>2</sub>O</b>       | 1025.0 <sup>+2</sup> | <b>y<sub>19</sub>-NH<sub>3</sub><sup>+2</sup></b> | 1443.8 | <b>y<sub>14</sub>-H<sub>2</sub>O</b>          | 2069.0 | <b>uATGG<br/>uITLLQ<br/>VEGTD<br/>GM-28</b>             |
| 286.1               | <b>VEG</b>                                       | 647.4 | <b>LTLuA-28</b>                   | 1025.5               | <b>TLuATG<br/>Gu-28</b>                           | 1444.7 | <b>y<sub>14</sub>-NH<sub>3</sub></b>          | 2078.0 | <b>b<sub>17</sub></b>                                   |
| 287.1               | <b>ATGG</b>                                      | 648.3 | <b>ATGGul-28</b>                  | 1025.5               | <b>uATGG<br/>uIT-28</b>                           | 1446.7 | <b>TGGuIT<br/>LLQVE<br/>GT</b>                | 2078.9 | <b>uATGG<br/>uITLLQ<br/>VEGTD<br/>GM-H<sub>2</sub>O</b> |
| 288.1               | <b>EGT</b>                                       | 648.3 | <b>LuATG<br/>G-28</b>             | 1026.5               | <b>LQVEG<br/>TDGMI-<br/>H<sub>2</sub>O</b>        | 1460.7 | <b>GuITLL<br/>QVEGT<br/>DG</b>                | 2079.0 | <b>LuATG<br/>GuITLL<br/>QVEGT<br/>DG</b>                |
| 300.2               | <b>y<sub>3</sub>-NH<sub>3</sub></b>              | 650.4 | <b>ITLLQV-<br/>H<sub>2</sub>O</b> | 1026.5               | <b>LLQVE<br/>GTDGM<br/>-H<sub>2</sub>O</b>        | 1460.7 | <b>GGuITL<br/>LQVEG<br/>TD</b>                | 2079.9 | <b>uATGG<br/>uITLLQ<br/>VEGTD<br/>GM-NH<sub>3</sub></b> |
| 300.2               | <b>ITL-28</b>                                    | 651.4 | <b>ITLLQV-<br/>NH<sub>3</sub></b> | 1027.5               | <b>LQVEG<br/>TDGMI-<br/>NH<sub>3</sub></b>        | 1461.8 | <b>y<sub>14</sub></b>                         | 2090.0 | <b>a<sub>18</sub>-NH<sub>3</sub></b>                    |
| 300.2               | <b>TLL-28</b>                                    | 656.4 | <b>TLLQVE<br/>-28</b>             | 1027.5               | <b>LLQVE<br/>GTDGM<br/>-NH<sub>3</sub></b>        | 1465.8 | <b>TLuATG<br/>GuITLL-<br/>28</b>              | 2093.1 | <b>LTLuAT<br/>GGuITL<br/>LQVEG<br/>T-28</b>             |
| 300.2               | <b>LTL-28</b>                                    | 657.3 | <b>LTLuA-<br/>H<sub>2</sub>O</b>  | 1030.6               | <b>GGuITL<br/>LQV-28</b>                          | 1465.8 | <b>LTLuAT<br/>GGuITL<br/>-28</b>              | 2095.0 | <b>TLuATG<br/>GuITLL<br/>QVEGT<br/>D-28</b>             |
| 301.6 <sup>+2</sup> | <b>y<sub>6</sub>-H<sub>2</sub>O<sup>+2</sup></b> | 658.3 | <b>ATGGul<br/>-H<sub>2</sub>O</b> | 1032.6               | <b>TGGuIT<br/>LLQ-28</b>                          | 1467.7 | <b>a<sub>12</sub></b>                         | 2097.0 | <b>uATGG<br/>uITLLQ<br/>VEGTD<br/>GM</b>                |
| 302.1 <sup>+2</sup> | <b>y<sub>6</sub>-NH<sub>3</sub><sup>+2</sup></b> | 658.3 | <b>LuATG<br/>G-H<sub>2</sub>O</b> | 1033.5 <sup>+2</sup> | <b>y<sub>19</sub><sup>+2</sup></b>                | 1475.7 | <b>TLuATG<br/>GuITLL-<br/>H<sub>2</sub>O</b>  | 2103.1 | <b>LTLuAT<br/>GGuITL<br/>LQVEG<br/>T-H<sub>2</sub>O</b> |
| 302.2               | <b>GMI</b>                                       | 659.3 | <b>QVEGT<br/>DG-28</b>            | 1035.4               | <b>uATGG<br/>uIT-H<sub>2</sub>O</b>               | 1475.7 | <b>LTLuAT<br/>GGuITL<br/>-H<sub>2</sub>O</b>  | 2104.1 | <b>LTLuAT<br/>GGuITL<br/>LQVEG<br/>T-NH<sub>3</sub></b> |
| 302.2               | <b>MIG</b>                                       | 661.3 | <b>GuITL</b>                      | 1035.4               | <b>TLuATG<br/>Gu-H<sub>2</sub>O</b>               | 1477.7 | <b>b<sub>12</sub>-H<sub>2</sub>O</b>          | 2105.0 | <b>TLuATG<br/>GuITLL<br/>QVEGT<br/>D-H<sub>2</sub>O</b> |
| 302.2               | <b>a<sub>3</sub></b>                             | 662.3 | <b>VEGTD<br/>GM-28</b>            | 1037.5               | <b>LuATG<br/>Gul-28</b>                           | 1478.8 | <b>uATGG<br/>uITLLQ<br/>V-28</b>              | 2106.0 | <b>TLuATG<br/>GuITLL<br/>QVEGT<br/>D-NH<sub>3</sub></b> |
| 303.1               | <b>GTDG-<br/>28</b>                              | 663.3 | <b>TLuAT</b>                      | 1040.6               | <b>GGuITL<br/>LQV-<br/>H<sub>2</sub>O</b>         | 1488.7 | <b>uATGG<br/>uITLLQ<br/>V-H<sub>2</sub>O</b>  | 2107.1 | <b>a<sub>18</sub></b>                                   |



|                     |                                     |                     |                                                                   |                      |                                                                   |        |                                                     |        |                                                               |
|---------------------|-------------------------------------|---------------------|-------------------------------------------------------------------|----------------------|-------------------------------------------------------------------|--------|-----------------------------------------------------|--------|---------------------------------------------------------------|
| 304.1               | <b>DGM</b>                          | 666.4               | <b>TLLQVE<br/>-H<sub>2</sub>O</b>                                 | 1041.5               | <b>GGuITL<br/>LQV-<br/>NH<sub>3</sub></b>                         | 1489.7 | <b>uATGG<br/>uITLLQ<br/>V-NH<sub>3</sub></b>        | 2117.0 | <b>b<sub>18</sub>-H<sub>2</sub>O</b>                          |
| 306.1               | <b>Gu-28</b>                        | 667.4               | <b>TLLQVE<br/>-NH<sub>3</sub></b>                                 | 1042.5               | <b>TGGuIT<br/>LLQ-<br/>H<sub>2</sub>O</b>                         | 1489.7 | <b>GGuITL<br/>LQVEG<br/>TDG-28</b>                  | 2118.0 | <b>b<sub>18</sub>-NH<sub>3</sub></b>                          |
| 310.2               | <b>ITL-H<sub>2</sub>O</b>           | 668.4               | <b>ITLLQV</b>                                                     | 1042.6               | <b>ITLLQV<br/>EGTD-<br/>28</b>                                    | 1489.8 | <b>ATGGuI<br/>TLLQVE<br/>GT-28</b>                  | 2119.1 | <b>y<sub>20</sub>-H<sub>2</sub>O</b>                          |
| 310.2               | <b>TLL-<br/>H<sub>2</sub>O</b>      | 669.3               | <b>QVEGT<br/>DG-H<sub>2</sub>O</b>                                | 1043.5               | <b>TGGuIT<br/>LLQ-<br/>NH<sub>3</sub></b>                         | 1492.8 | <b>LuATG<br/>GuITLL<br/>Q-28</b>                    | 2120.0 | <b>y<sub>20</sub>-NH<sub>3</sub></b>                          |
| 310.2               | <b>LTL-<br/>H<sub>2</sub>O</b>      | 670.3               | <b>QVEGT<br/>DG-NH<sub>3</sub></b>                                | 1044.5               | <b>LLQVE<br/>GTDGM</b>                                            | 1493.8 | <b>TLuATG<br/>GuITLL</b>                            | 2121.1 | <b>LTLuAT<br/>GGuITL<br/>LQVEG<br/>T</b>                      |
| 310.7 <sup>+2</sup> | <b>y<sub>6</sub><sup>+2</sup></b>   | 671.9 <sup>+2</sup> | <b>y<sub>13</sub><sup>-</sup><br/>H<sub>2</sub>O<sup>+2</sup></b> | 1044.5               | <b>LQVEG<br/>TDGMI</b>                                            | 1493.8 | <b>LTLuAT<br/>GGuITL</b>                            | 2123.0 | <b>TLuATG<br/>GuITLL<br/>QVEGT<br/>D</b>                      |
| 312.2               | <b>b<sub>3</sub>-H<sub>2</sub>O</b> | 672.3               | <b>VEGTD<br/>GM-H<sub>2</sub>O</b>                                | 1045.6               | <b>uITLLQ<br/>VE-28</b>                                           | 1495.7 | <b>b<sub>12</sub></b>                               | 2135.1 | <b>b<sub>18</sub></b>                                         |
| 313.1               | <b>GTDG-<br/>H<sub>2</sub>O</b>     | 672.4 <sup>+2</sup> | <b>y<sub>13</sub><sup>-</sup><br/>NH<sub>3</sub><sup>+2</sup></b> | 1047.5               | <b>LuATG<br/>GuI-H<sub>2</sub>O</b>                               | 1499.7 | <b>GGuITL<br/>LQVEG<br/>TDG-<br/>H<sub>2</sub>O</b> | 2137.1 | <b>y<sub>20</sub></b>                                         |
| 313.2               | <b>LQV-28</b>                       | 675.4               | <b>LTLuA</b>                                                      | 1052.6               | <b>ITLLQV<br/>EGTD-<br/>H<sub>2</sub>O</b>                        | 1499.8 | <b>ATGGuI<br/>TLLQVE<br/>GT-H<sub>2</sub>O</b>      | 2152.1 | <b>TLuATG<br/>GuITLL<br/>QVEGT<br/>DG-28</b>                  |
| 317.2               | <b>y<sub>3</sub></b>                | 676.3               | <b>EGTDG<br/>MI-28</b>                                            | 1053.5               | <b>uATGG<br/>uIT</b>                                              | 1500.7 | <b>GGuITL<br/>LQVEG<br/>TDG-<br/>NH<sub>3</sub></b> | 2162.0 | <b>TLuATG<br/>GuITLL<br/>QVEGT<br/>DG-H<sub>2</sub>O</b>      |
| 320.1               | <b>uA-28</b>                        | 676.3               | <b>ATGGuI</b>                                                     | 1053.5               | <b>TLuATG<br/>Gu</b>                                              | 1500.7 | <b>ATGGuI<br/>TLLQVE<br/>GT-NH<sub>3</sub></b>      | 2163.0 | <b>TLuATG<br/>GuITLL<br/>QVEGT<br/>DG-NH<sub>3</sub></b>      |
| 324.2               | <b>LQV-<br/>NH<sub>3</sub></b>      | 676.3               | <b>LuATG<br/>G</b>                                                | 1053.5               | <b>ITLLQV<br/>EGTD-<br/>NH<sub>3</sub></b>                        | 1502.8 | <b>LuATG<br/>GuITLL<br/>Q-H<sub>2</sub>O</b>        | 2180.0 | <b>TLuATG<br/>GuITLL<br/>QVEGT<br/>DG</b>                     |
| 327.2               | <b>LLQ-28</b>                       | 678.3               | <b>TGGuIT<br/>-28</b>                                             | 1055.6               | <b>uITLLQ<br/>VE-H<sub>2</sub>O</b>                               | 1503.7 | <b>LuATG<br/>GuITLL<br/>Q-NH<sub>3</sub></b>        | 2182.0 | <b>uATGG<br/>uITLLQ<br/>VEGTD<br/>GMI-28</b>                  |
| 328.2               | <b>TLL</b>                          | 680.9 <sup>+2</sup> | <b>y<sub>13</sub><sup>+2</sup></b>                                | 1056.5               | <b>uITLLQ<br/>VE-NH<sub>3</sub></b>                               | 1506.7 | <b>uITLLQ<br/>VEGTD<br/>GM-28</b>                   | 2182.0 | <b>LuATG<br/>GuITLL<br/>QVEGT<br/>DGM-28</b>                  |
| 328.2               | <b>ITL</b>                          | 684.4               | <b>TLLQVE</b>                                                     | 1058.6               | <b>GGuITL<br/>LQV</b>                                             | 1506.8 | <b>uATGG<br/>uITLLQ<br/>V</b>                       | 2191.1 | <b>a<sub>19</sub>-NH<sub>3</sub></b>                          |
| 328.2               | <b>LTL</b>                          | 686.3               | <b>EGTDG<br/>MI-H<sub>2</sub>O</b>                                | 1060.0 <sup>+2</sup> | <b>y<sub>20</sub><sup>-</sup><br/>H<sub>2</sub>O<sup>+2</sup></b> | 1516.7 | <b>uITLLQ<br/>VEGTD<br/>GM-H<sub>2</sub>O</b>       | 2192.0 | <b>uATGG<br/>uITLLQ<br/>VEGTD<br/>GMI-<br/>H<sub>2</sub>O</b> |

|                     |                                                  |       |                                     |                      |                                                                   |        |                                                     |        |                                                               |
|---------------------|--------------------------------------------------|-------|-------------------------------------|----------------------|-------------------------------------------------------------------|--------|-----------------------------------------------------|--------|---------------------------------------------------------------|
| 329.2               | <b>QVE-28</b>                                    | 687.3 | <b>QVEGT<br/>DG</b>                 | 1060.5 <sup>+2</sup> | <b>y<sub>20</sub><sup>-</sup><br/>NH<sub>3</sub><sup>+2</sup></b> | 1517.7 | <b>uITLLQ<br/>VEGTD<br/>GM-NH<sub>3</sub></b>       | 2192.0 | <b>LuATG<br/>GuITLL<br/>QVEGT<br/>DGM-<br/>H<sub>2</sub>O</b> |
| 330.2               | <b>b<sub>3</sub></b>                             | 688.3 | <b>TGGuIT<br/>-H<sub>2</sub>O</b>   | 1060.6               | <b>TGGuIT<br/>LLQ</b>                                             | 1517.7 | <b>GGuITL<br/>LQVEG<br/>TDG</b>                     | 2193.0 | <b>uATGG<br/>uITLLQ<br/>VEGTD<br/>GMI-<br/>NH<sub>3</sub></b> |
| 331.1               | <b>GTDG</b>                                      | 689.4 | <b>uITLL-<br/>28</b>                | 1065.5               | <b>LuATG<br/>Gul</b>                                              | 1517.8 | <b>ATGGul<br/>TLLQVE<br/>GT</b>                     | 2193.0 | <b>LuATG<br/>GuITLL<br/>QVEGT<br/>DGM-<br/>NH<sub>3</sub></b> |
| 331.2               | <b>GMIG-<br/>28</b>                              | 690.3 | <b>VEGTD<br/>GM</b>                 | 1069.0 <sup>+2</sup> | <b>y<sub>20</sub><sup>+2</sup></b>                                | 1520.8 | <b>LuATG<br/>GuITLL<br/>Q</b>                       | 2208.1 | <b>a<sub>19</sub></b>                                         |
| 334.1               | <b>Gu</b>                                        | 690.4 | <b>GGuITL<br/>-28</b>               | 1070.6               | <b>ITLLQV<br/>EGTD</b>                                            | 1533.8 | <b>TGGuIT<br/>LLQVE<br/>GTD-28</b>                  | 2208.1 | <b>LTLuAT<br/>GGuITL<br/>LQVEG<br/>TD-28</b>                  |
| 338.2               | <b>LLQ-<br/>NH<sub>3</sub></b>                   | 691.4 | <b>a<sub>5</sub></b>                | 1073.5               | <b>LQVEG<br/>TDGMI<br/>G-28</b>                                   | 1534.7 | <b>uITLLQ<br/>VEGTD<br/>GM</b>                      | 2210.0 | <b>uATGG<br/>uITLLQ<br/>VEGTD<br/>GMI</b>                     |
| 339.2               | <b>QVE-<br/>H<sub>2</sub>O</b>                   | 692.3 | <b>TLuATG<br/>-28</b>               | 1073.6               | <b>uITLLQ<br/>VE</b>                                              | 1543.7 | <b>TGGuIT<br/>LLQVE<br/>GTD-<br/>H<sub>2</sub>O</b> | 2210.0 | <b>LuATG<br/>GuITLL<br/>QVEGT<br/>DGM</b>                     |
| 340.2               | <b>QVE-<br/>NH<sub>3</sub></b>                   | 699.4 | <b>uITLL-<br/>H<sub>2</sub>O</b>    | 1083.5               | <b>LQVEG<br/>TDGMI<br/>G-H<sub>2</sub>O</b>                       | 1544.7 | <b>TGGuIT<br/>LLQVE<br/>GTD-<br/>NH<sub>3</sub></b> | 2218.1 | <b>b<sub>19</sub>-H<sub>2</sub>O</b>                          |
| 341.2               | <b>LQV</b>                                       | 700.4 | <b>GGuITL<br/>-H<sub>2</sub>O</b>   | 1084.5               | <b>LQVEG<br/>TDGMI<br/>G-NH<sub>3</sub></b>                       | 1556.8 | <b>y<sub>15</sub>-H<sub>2</sub>O</b>                | 2218.1 | <b>LTLuAT<br/>GGuITL<br/>LQVEG<br/>TD-H<sub>2</sub>O</b>      |
| 348.1               | <b>uA</b>                                        | 701.3 | <b>b<sub>5</sub>-H<sub>2</sub>O</b> | 1099.6               | <b>ITLLQV<br/>EGTDG-<br/>28</b>                                   | 1557.8 | <b>y<sub>15</sub>-NH<sub>3</sub></b>                | 2219.1 | <b>b<sub>19</sub>-NH<sub>3</sub></b>                          |
| 352.2 <sup>+2</sup> | <b>y<sub>7</sub>-H<sub>2</sub>O<sup>+2</sup></b> | 702.3 | <b>TLuATG<br/>-H<sub>2</sub>O</b>   | 1101.5               | <b>LQVEG<br/>TDGMI<br/>G</b>                                      | 1561.8 | <b>TGGuIT<br/>LLQVE<br/>GTD</b>                     | 2219.1 | <b>LTLuAT<br/>GGuITL<br/>LQVEG<br/>TD-NH<sub>3</sub></b>      |
| 352.7 <sup>+2</sup> | <b>y<sub>7</sub>-NH<sub>3</sub><sup>+2</sup></b> | 703.3 | <b>y<sub>7</sub>-H<sub>2</sub>O</b> | 1102.6               | <b>GuITLL<br/>QVE-28</b>                                          | 1563.8 | <b>GuITLL<br/>QVEGT<br/>DGM-28</b>                  | 2236.1 | <b>LTLuAT<br/>GGuITL<br/>LQVEG<br/>TD</b>                     |
| 355.2               | <b>LLQ</b>                                       | 704.3 | <b>EGTDG<br/>MI</b>                 | 1102.6               | <b>uITLLQ<br/>VEG-28</b>                                          | 1573.7 | <b>GuITLL<br/>QVEGT<br/>DGM-<br/>H<sub>2</sub>O</b> | 2236.1 | <b>b<sub>19</sub></b>                                         |
| 357.2               | <b>QVE</b>                                       | 704.3 | <b>y<sub>7</sub>-NH<sub>3</sub></b> | 1103.6               | <b>ATGGul<br/>TLLQ-<br/>28</b>                                    | 1574.7 | <b>GuITLL<br/>QVEGT<br/>DGM-<br/>NH<sub>3</sub></b> | 2239.1 | <b>uATGG<br/>uITLLQ<br/>VEGTD<br/>GMIG-<br/>28</b>            |

|                     |                                                  |                     |                                                        |        |                                             |        |                                                      |        |                                                                |
|---------------------|--------------------------------------------------|---------------------|--------------------------------------------------------|--------|---------------------------------------------|--------|------------------------------------------------------|--------|----------------------------------------------------------------|
| 359.2               | <b>GMIG</b>                                      | 706.3               | <b>TGGuIT</b>                                          | 1109.6 | <b>ITLLQV<br/>EGTDG-<br/>H<sub>2</sub>O</b> | 1574.8 | <b>y<sub>15</sub></b>                                | 2249.0 | <b>uATGG<br/>uITLLQ<br/>VEGTD<br/>GMIG-<br/>H<sub>2</sub>O</b> |
| 359.2               | <b>VEGT-<br/>28</b>                              | 713.4               | <b>TLLQVE<br/>G-28</b>                                 | 1110.6 | <b>ITLLQV<br/>EGTDG-<br/>NH<sub>3</sub></b> | 1578.8 | <b>LTLuAT<br/>GGuITL<br/>L-28</b>                    | 2250.0 | <b>uATGG<br/>uITLLQ<br/>VEGTD<br/>GMIG-<br/>NH<sub>3</sub></b> |
| 361.2 <sup>+2</sup> | <b>y<sub>7</sub><sup>+2</sup></b>                | 713.4               | <b>LLQVE<br/>GT-28</b>                                 | 1112.6 | <b>GuITLL<br/>QVE-<br/>H<sub>2</sub>O</b>   | 1580.8 | <b>a<sub>13</sub></b>                                | 2265.1 | <b>LTLuAT<br/>GGuITL<br/>LQVEG<br/>TDG-28</b>                  |
| 362.2               | <b>ul-28</b>                                     | 715.4               | <b>LQVEG<br/>TD-28</b>                                 | 1112.6 | <b>uITLLQ<br/>VEG-<br/>H<sub>2</sub>O</b>   | 1588.8 | <b>LTLuAT<br/>GGuITL<br/>L-H<sub>2</sub>O</b>        | 2267.1 | <b>uATGG<br/>uITLLQ<br/>VEGTD<br/>GMIG</b>                     |
| 362.2               | <b>Lu-28</b>                                     | 717.4               | <b>uITLL</b>                                           | 1113.6 | <b>GuITLL<br/>QVE-<br/>NH<sub>3</sub></b>   | 1590.8 | <b>b<sub>13</sub>-H<sub>2</sub>O</b>                 | 2275.1 | <b>LTLuAT<br/>GGuITL<br/>LQVEG<br/>TDG-<br/>H<sub>2</sub>O</b> |
| 363.2               | <b>GGu-28</b>                                    | 718.4               | <b>GGuITL</b>                                          | 1113.6 | <b>uITLLQ<br/>VEG-<br/>NH<sub>3</sub></b>   | 1590.8 | <b>TGGuIT<br/>LLQVE<br/>GTDG-<br/>28</b>             | 2276.1 | <b>LTLuAT<br/>GGuITL<br/>LQVEG<br/>TDG-<br/>NH<sub>3</sub></b> |
| 369.2               | <b>VEGT-<br/>H<sub>2</sub>O</b>                  | 719.3               | <b>b<sub>5</sub></b>                                   | 1113.6 | <b>ATGGuI<br/>TLLQ-<br/>H<sub>2</sub>O</b>  | 1591.8 | <b>GuITLL<br/>QVEGT<br/>DGM</b>                      | 2283.1 | <b>TLuATG<br/>GuITLL<br/>QVEGT<br/>DGM-28</b>                  |
| 375.2               | <b>EGTD-<br/>28</b>                              | 720.3               | <b>TLuATG</b>                                          | 1114.6 | <b>ATGGuI<br/>TLLQ-<br/>NH<sub>3</sub></b>  | 1591.8 | <b>LuATG<br/>GuITLL<br/>QV-28</b>                    | 2293.1 | <b>TLuATG<br/>GuITLL<br/>QVEGT<br/>DGM-<br/>H<sub>2</sub>O</b> |
| 377.1               | <b>TDGM-<br/>28</b>                              | 721.4               | <b>y<sub>7</sub></b>                                   | 1116.5 | <b>y<sub>11</sub>-H<sub>2</sub>O</b>        | 1593.8 | <b>TLuATG<br/>GuITLL<br/>Q-28</b>                    | 2293.1 | <b>LTLuAT<br/>GGuITL<br/>LQVEG<br/>TDG</b>                     |
| 380.7 <sup>+2</sup> | <b>y<sub>8</sub>-H<sub>2</sub>O<sup>+2</sup></b> | 722.4 <sup>+2</sup> | <b>y<sub>14</sub>-<br/>H<sub>2</sub>O<sup>+2</sup></b> | 1117.5 | <b>y<sub>11</sub>-NH<sub>3</sub></b>        | 1600.8 | <b>TGGuIT<br/>LLQVE<br/>GTDG-<br/>H<sub>2</sub>O</b> | 2294.1 | <b>TLuATG<br/>GuITLL<br/>QVEGT<br/>DGM-<br/>NH<sub>3</sub></b> |
| 381.2 <sup>+2</sup> | <b>y<sub>8</sub>-NH<sub>3</sub><sup>+2</sup></b> | 722.9 <sup>+2</sup> | <b>y<sub>14</sub>-<br/>NH<sub>3</sub><sup>+2</sup></b> | 1117.6 | <b>TLLQVE<br/>GTDGM<br/>-28</b>             | 1601.8 | <b>TGGuIT<br/>LLQVE<br/>GTDG-<br/>NH<sub>3</sub></b> | 2295.1 | <b>LuATG<br/>GuITLL<br/>QVEGT<br/>DGMI-<br/>28</b>             |
| 385.1               | <b>EGTD-<br/>H<sub>2</sub>O</b>                  | 723.4               | <b>TLLQVE<br/>G-H<sub>2</sub>O</b>                     | 1127.5 | <b>TLLQVE<br/>GTDGM<br/>-H<sub>2</sub>O</b> | 1601.8 | <b>LuATG<br/>GuITLL<br/>QV-H<sub>2</sub>O</b>        | 2305.1 | <b>LuATG<br/>GuITLL<br/>QVEGT<br/>DGMI-<br/>H<sub>2</sub>O</b> |

|                     |                                   |                     |                                    |        |                                     |        |                                         |        |                                                |
|---------------------|-----------------------------------|---------------------|------------------------------------|--------|-------------------------------------|--------|-----------------------------------------|--------|------------------------------------------------|
| 386.2               | <b>QVEG-28</b>                    | 723.4               | <b>LLQVE GT-H<sub>2</sub>O</b>     | 1127.6 | <b>ITLLQV EGTGDG</b>                | 1602.8 | <b>LuATG GuITLL QV-NH<sub>3</sub></b>   | 2306.1 | <b>LuATG GuITLL QVEGT DGMI-NH<sub>3</sub></b>  |
| 387.1               | <b>TDGM-H<sub>2</sub>O</b>        | 724.4               | <b>TLLQVE G-NH<sub>3</sub></b>     | 1128.5 | <b>TLLQVE GTDGM -NH<sub>3</sub></b> | 1603.8 | <b>TLuATG GuITLL Q-H<sub>2</sub>O</b>   | 2306.1 | <b>a<sub>20</sub>-NH<sub>3</sub></b>           |
| 387.2               | <b>VEGT</b>                       | 724.4               | <b>LLQVE GT-NH<sub>3</sub></b>     | 1129.6 | <b>LLQVE GTDGM I-28</b>             | 1604.8 | <b>TLuATG GuITLL Q-NH<sub>3</sub></b>   | 2311.1 | <b>TLuATG GuITLL QVEGT DGM</b>                 |
| 389.2               | <b>DGMI-28</b>                    | 725.3               | <b>LQVEG TD-H<sub>2</sub>O</b>     | 1130.6 | <b>GuITLL QVE</b>                   | 1604.8 | <b>ATGGuI TLLQVE GTD-28</b>             | 2323.1 | <b>LuATG GuITLL QVEGT DGMI</b>                 |
| 389.7 <sup>+2</sup> | <b>y<sub>8</sub><sup>+2</sup></b> | 726.3               | <b>LQVEG TD-NH<sub>3</sub></b>     | 1130.6 | <b>uITLLQ VEG</b>                   | 1606.8 | <b>LTLuAT GGuITL L</b>                  | 2323.1 | <b>a<sub>20</sub></b>                          |
| 390.2               | <b>ul</b>                         | 731.4 <sup>+2</sup> | <b>y<sub>14</sub><sup>+2</sup></b> | 1131.6 | <b>ATGGuI TLLQ</b>                  | 1607.8 | <b>uATGG uITLLQ VE-28</b>               | 2333.1 | <b>b<sub>20</sub>-H<sub>2</sub>O</b>           |
| 390.2               | <b>Lu</b>                         | 733.3               | <b>EGTDG MIG-28</b>                | 1131.6 | <b>TGGuIT LLQV-28</b>               | 1608.8 | <b>b<sub>13</sub></b>                   | 2334.1 | <b>b<sub>20</sub>-NH<sub>3</sub></b>           |
| 391.1               | <b>GGu</b>                        | 741.4               | <b>TLLQVE G</b>                    | 1134.5 | <b>y<sub>11</sub></b>               | 1614.8 | <b>ATGGuI TLLQVE GTD-H<sub>2</sub>O</b> | 2351.1 | <b>b<sub>20</sub></b>                          |
| 396.2               | <b>QVEG-H<sub>2</sub>O</b>        | 741.4               | <b>LLQVE GT</b>                    | 1138.5 | <b>TLuATG GuI-28</b>                | 1615.8 | <b>ATGGuI TLLQVE GTD-NH<sub>3</sub></b> | 2352.1 | <b>LuATG GuITLL QVEGT DGMIG-28</b>             |
| 397.2               | <b>QVEG-NH<sub>3</sub></b>        | 743.3               | <b>EGTDG MIG-H<sub>2</sub>O</b>    | 1138.5 | <b>uATGG uITL-28</b>                | 1617.8 | <b>uATGG uITLLQ VE-H<sub>2</sub>O</b>   | 2362.1 | <b>LuATG GuITLL QVEGT DGMIG-H<sub>2</sub>O</b> |
| 399.2               | <b>DGMI-H<sub>2</sub>O</b>        | 743.4               | <b>LQVEG TD</b>                    | 1138.5 | <b>LuATG GuIT-28</b>                | 1618.8 | <b>uATGG uITLLQ VE-NH<sub>3</sub></b>   | 2363.1 | <b>LuATG GuITLL QVEGT DGMIG-NH<sub>3</sub></b> |
| 403.1               | <b>EGTD</b>                       | 746.4               | <b>GuITLL-28</b>                   | 1138.5 | <b>LTLuAT GGu-28</b>                | 1618.8 | <b>TGGuIT LLQVE GTDG</b>                | 2363.1 | <b>a<sub>21</sub>-NH<sub>3</sub></b>           |
| 405.1               | <b>TDGM</b>                       | 748.4               | <b>LTLuAT -28</b>                  | 1139.6 | <b>LLQVE GTDGM I-H<sub>2</sub>O</b> | 1619.8 | <b>uITLLQ VEGTD GMI-28</b>              | 2380.1 | <b>LuATG GuITLL QVEGT DGMIG</b>                |
| 413.3               | <b>ITLL-28</b>                    | 749.4               | <b>ATGGuI T-28</b>                 | 1140.6 | <b>LLQVE GTDGM I-NH<sub>3</sub></b> | 1619.8 | <b>LuATG GuITLL QV</b>                  | 2380.2 | <b>a<sub>21</sub></b>                          |
| 414.2               | <b>QVEG</b>                       | 749.4               | <b>TLuATG G-28</b>                 | 1141.6 | <b>TGGuIT LLQV-H<sub>2</sub>O</b>   | 1620.8 | <b>GGuITL LQVEG TDGM-28</b>             | 2390.1 | <b>b<sub>21</sub>-H<sub>2</sub>O</b>           |

|       |                                     |       |                                     |        |                                  |        |                                        |        |                                             |
|-------|-------------------------------------|-------|-------------------------------------|--------|----------------------------------|--------|----------------------------------------|--------|---------------------------------------------|
| 415.3 | <b>a<sub>4</sub></b>                | 756.4 | <b>GuITLL-H<sub>2</sub>O</b>        | 1142.6 | <b>TGGuITLLQV-NH<sub>3</sub></b> | 1621.8 | <b>TLuATGGuITLLQ</b>                   | 2391.1 | <b>b<sub>21</sub>-NH<sub>3</sub></b>        |
| 417.2 | <b>DGMI</b>                         | 758.4 | <b>LTLuAT-H<sub>2</sub>O</b>        | 1145.6 | <b>TLLQVEGTDGM</b>               | 1629.8 | <b>uITLLQVEGTDGMI-H<sub>2</sub>O</b>   | 2395.2 | <b>y<sub>21</sub>-H<sub>2</sub>O</b>        |
| 419.2 | <b>Gul-28</b>                       | 759.4 | <b>ATGGulT-H<sub>2</sub>O</b>       | 1148.5 | <b>uATGGuITL-H<sub>2</sub>O</b>  | 1630.8 | <b>GGuITLLQVEGTDGM-H<sub>2</sub>O</b>  | 2396.1 | <b>y<sub>21</sub>-NH<sub>3</sub></b>        |
| 421.2 | <b>uAT-28</b>                       | 759.4 | <b>TLuATGG-H<sub>2</sub>O</b>       | 1148.5 | <b>LuATGGuIT-H<sub>2</sub>O</b>  | 1630.8 | <b>uITLLQVEGTDGMI-NH<sub>3</sub></b>   | 2396.2 | <b>LTLuATGGuITLLQVEGTDGM-28</b>             |
| 423.3 | <b>ITLL-H<sub>2</sub>O</b>          | 760.4 | <b>y<sub>8</sub>-H<sub>2</sub>O</b> | 1148.5 | <b>TLuATGGul-H<sub>2</sub>O</b>  | 1631.7 | <b>GGuITLLQVEGTDGM-NH<sub>3</sub></b>  | 2396.2 | <b>TLuATGGuITLLQVEGTDGMI-28</b>             |
| 425.2 | <b>b<sub>4</sub>-H<sub>2</sub>O</b> | 761.3 | <b>EGTDGMIG</b>                     | 1148.5 | <b>LTLuATGGu-H<sub>2</sub>O</b>  | 1632.8 | <b>ATGGulTLLQVEGTD</b>                 | 2406.2 | <b>TLuATGGuITLLQVEGTDGMI-H<sub>2</sub>O</b> |
| 426.3 | <b>LLQV-28</b>                      | 761.3 | <b>y<sub>8</sub>-NH<sub>3</sub></b> | 1157.6 | <b>LLQVEGTDGMI</b>               | 1635.8 | <b>uATGGuITLLQVE</b>                   | 2406.2 | <b>LTLuATGGuITLLQVEGTDGM-H<sub>2</sub>O</b> |
| 428.3 | <b>TLLQ-28</b>                      | 762.4 | <b>a<sub>6</sub></b>                | 1159.6 | <b>GuITLLQVEG-28</b>             | 1647.8 | <b>uITLLQVEGTDGMI</b>                  | 2407.1 | <b>LTLuATGGuITLLQVEGTDGM-NH<sub>3</sub></b> |
| 431.2 | <b>uAT-H<sub>2</sub>O</b>           | 769.5 | <b>ITLLQVE-28</b>                   | 1159.6 | <b>GGuITLLQVE-28</b>             | 1648.8 | <b>GGuITLLQVEGTDGM</b>                 | 2407.1 | <b>TLuATGGuITLLQVEGTDGMI-NH<sub>3</sub></b> |
| 431.2 | <b>y<sub>4</sub>-NH<sub>3</sub></b> | 772.4 | <b>b<sub>6</sub>-H<sub>2</sub>O</b> | 1159.6 | <b>TGGuITLLQV</b>                | 1661.8 | <b>ATGGulTLLQVEGTDG-28</b>             | 2408.2 | <b>b<sub>21</sub></b>                       |
| 432.2 | <b>EGTDG-28</b>                     | 772.4 | <b>LQVEGTDG-28</b>                  | 1166.5 | <b>uATGGuITL</b>                 | 1664.8 | <b>uATGGuITLLQVEG-28</b>               | 2413.2 | <b>y<sub>21</sub></b>                       |
| 433.2 | <b>LuA-28</b>                       | 774.4 | <b>GuITLL</b>                       | 1166.5 | <b>LuATGGuIT</b>                 | 1671.8 | <b>ATGGulTLLQVEGTDG-H<sub>2</sub>O</b> | 2424.2 | <b>LTLuATGGuITLLQVEGTDGM</b>                |
| 434.2 | <b>GTDGM-28</b>                     | 775.4 | <b>VEGTDGMI-28</b>                  | 1166.5 | <b>TLuATGGul</b>                 | 1672.8 | <b>ATGGulTLLQVEGTDG-NH<sub>3</sub></b> | 2424.2 | <b>TLuATGGuITLLQVEGTDGMI</b>                |
| 437.3 | <b>LLQV-NH<sub>3</sub></b>          | 776.4 | <b>LTLuAT</b>                       | 1166.5 | <b>LTLuATGGu</b>                 | 1674.8 | <b>uATGGuITLLQVEG-H<sub>2</sub>O</b>   | 2453.2 | <b>TLuATGGuITLLQVEGTDGMIG-</b>              |

|                     |                                                |                     |                                                                |                      |                                                                |        |                                              |        |                                                         |
|---------------------|------------------------------------------------|---------------------|----------------------------------------------------------------|----------------------|----------------------------------------------------------------|--------|----------------------------------------------|--------|---------------------------------------------------------|
|                     |                                                |                     |                                                                |                      |                                                                |        |                                              |        | 28                                                      |
| 438.3               | TLLQ-H <sub>2</sub> O                          | 777.4               | ATGGul<br>T                                                    | 1169.6               | GuITLL<br>QVEG-<br>H <sub>2</sub> O                            | 1675.8 | uATGG<br>uITLLQ<br>VEG-<br>NH <sub>3</sub>   | 2463.2 | TLuATG<br>GuITLL<br>QVEGT<br>DGMIG-<br>H <sub>2</sub> O |
| 439.3               | TLLQ-NH <sub>3</sub>                           | 777.4               | TLuATG<br>G                                                    | 1169.6               | GGuITL<br>LQVE-<br>H <sub>2</sub> O                            | 1676.8 | GuITLL<br>QVEGT<br>DGMI-<br>28               | 2464.2 | TLuATG<br>GuITLL<br>QVEGT<br>DGMIG-<br>NH <sub>3</sub>  |
| 441.3               | ITLL                                           | 778.4               | y <sub>8</sub>                                                 | 1170.6               | GGuITL<br>LQVE-<br>NH <sub>3</sub>                             | 1676.8 | uITLLQ<br>VEGTD<br>GMIG-<br>28               | 2481.2 | TLuATG<br>GuITLL<br>QVEGT<br>DGMIG                      |
| 442.2               | EGTDG-H <sub>2</sub> O                         | 778.9 <sup>+2</sup> | y <sub>15</sub> <sup>-</sup><br>H <sub>2</sub> O <sup>+2</sup> | 1170.6               | GuITLL<br>QVEG-<br>NH <sub>3</sub>                             | 1686.8 | GuITLL<br>QVEGT<br>DGMI-<br>H <sub>2</sub> O | 2494.2 | a <sub>22</sub> -NH <sub>3</sub>                        |
| 442.3               | LQVE-28                                        | 779.4 <sup>+2</sup> | y <sub>15</sub> <sup>-</sup><br>NH <sub>3</sub> <sup>+2</sup>  | 1186.6               | LLQVE<br>GTDGM<br>IG-28                                        | 1686.8 | uITLLQ<br>VEGTD<br>GMIG-<br>H <sub>2</sub> O | 2508.2 | y <sub>22</sub> -H <sub>2</sub> O                       |
| 443.3               | b <sub>4</sub>                                 | 779.5               | ITLLQV<br>E-H <sub>2</sub> O                                   | 1187.6               | GGuITL<br>LQVE                                                 | 1687.8 | GuITLL<br>QVEGT<br>DGMI-<br>NH <sub>3</sub>  | 2509.2 | y <sub>22</sub> -NH <sub>3</sub>                        |
| 444.2               | GTDGM-H <sub>2</sub> O                         | 780.5               | ITLLQV<br>E-NH <sub>3</sub>                                    | 1187.6               | GuITLL<br>QVEG                                                 | 1687.8 | uITLLQ<br>VEGTD<br>GMIG-<br>NH <sub>3</sub>  | 2509.3 | LTLuAT<br>GGuITL<br>LQVEG<br>TDGMI-<br>28               |
| 445.2 <sup>+2</sup> | y <sub>9</sub> -H <sub>2</sub> O <sup>+2</sup> | 782.4               | LQVEG<br>TDG-<br>H <sub>2</sub> O                              | 1196.6               | LLQVE<br>GTDGM<br>IG-H <sub>2</sub> O                          | 1689.8 | ATGGul<br>TLLQVE<br>GTDG                     | 2511.2 | a <sub>22</sub>                                         |
| 445.7 <sup>+2</sup> | y <sub>9</sub> -NH <sub>3</sub> <sup>+2</sup>  | 783.4               | LQVEG<br>TDG-<br>NH <sub>3</sub>                               | 1197.6               | LLQVE<br>GTDGM<br>IG-NH <sub>3</sub>                           | 1692.8 | uATGG<br>uITLLQ<br>VEG                       | 2519.2 | LTLuAT<br>GGuITL<br>LQVEG<br>TDGMI-<br>H <sub>2</sub> O |
| 446.2               | DGMIG-28                                       | 785.3               | VEGTD<br>GMI-<br>H <sub>2</sub> O                              | 1198.1 <sup>+2</sup> | y <sub>21</sub> <sup>-</sup><br>H <sub>2</sub> O <sup>+2</sup> | 1692.9 | TLuATG<br>GuITLL<br>QV-28                    | 2520.2 | LTLuAT<br>GGuITL<br>LQVEG<br>TDGMI-<br>NH <sub>3</sub>  |
| 447.2               | Gul                                            | 787.9 <sup>+2</sup> | y <sub>15</sub> <sup>+2</sup>                                  | 1198.6 <sup>+2</sup> | y <sub>21</sub> <sup>-</sup><br>NH <sub>3</sub> <sup>+2</sup>  | 1693.9 | a <sub>14</sub>                              | 2521.2 | b <sub>22</sub> -H <sub>2</sub> O                       |
| 448.3               | y <sub>4</sub>                                 | 790.3               | QVEGT<br>DGM-28                                                | 1202.7               | ATGGul<br>TLLQV-<br>28                                         | 1702.9 | TLuATG<br>GuITLL<br>QV-H <sub>2</sub> O      | 2522.2 | b <sub>22</sub> -NH <sub>3</sub>                        |
| 449.2               | uAT                                            | 790.4               | b <sub>6</sub>                                                 | 1203.6               | uITLLQ<br>VEGT-<br>28                                          | 1703.9 | TLuATG<br>GuITLL<br>QV-NH <sub>3</sub>       | 2526.2 | y <sub>22</sub>                                         |

|                     |                              |       |                            |                      |                                   |        |                                      |        |                                                          |
|---------------------|------------------------------|-------|----------------------------|----------------------|-----------------------------------|--------|--------------------------------------|--------|----------------------------------------------------------|
| 452.3               | LQVE-H <sub>2</sub> O        | 791.4 | TGGuIT L-28                | 1207.1 <sup>+2</sup> | y <sub>21</sub> <sup>+2</sup>     | 1703.9 | b <sub>14</sub> -H <sub>2</sub> O    | 2537.3 | LTLuAT<br>GGuITL<br>LQVEG<br>TDGMI                       |
| 453.2               | LQVE-NH <sub>3</sub>         | 797.5 | ITLLQV E                   | 1212.6               | ATGGuITLLQV-H <sub>2</sub> O      | 1704.8 | GuITLL QVEGT DGMIG                   | 2539.2 | b <sub>22</sub>                                          |
| 454.2 <sup>+2</sup> | y <sub>9</sub> <sup>+2</sup> | 800.3 | QVEGT DGM-H <sub>2</sub> O | 1213.6               | ATGGuITLLQV-NH <sub>3</sub>       | 1704.8 | uITLLQ VEGTD GMIG                    | 2566.3 | LTLuAT<br>GGuITL<br>LQVEG<br>TDGMI<br>G-28               |
| 454.3               | LLQV                         | 800.4 | LQVEG TDG                  | 1213.6               | uITLLQ VEGT-H <sub>2</sub> O      | 1706.9 | LTLuAT GGuITL LQ-28                  | 2576.3 | LTLuAT<br>GGuITL<br>LQVEG<br>TDGMI<br>G-H <sub>2</sub> O |
| 456.2               | DGMIG-H <sub>2</sub> O       | 801.3 | QVEGT DGM-NH <sub>3</sub>  | 1214.6               | LLQVE GTDGM IG                    | 1716.9 | LTLuAT GGuITL LQ-H <sub>2</sub> O    | 2577.2 | LTLuAT<br>GGuITL<br>LQVEG<br>TDGMI<br>G-NH <sub>3</sub>  |
| 456.3               | TLLQ                         | 801.4 | TGGuIT L-H <sub>2</sub> O  | 1214.6               | uITLLQ VEGT-NH <sub>3</sub>       | 1717.9 | LTLuAT GGuITL LQ-NH <sub>3</sub>     | 2594.3 | LTLuAT<br>GGuITL<br>LQVEG<br>TDGMI<br>G                  |
| 460.2               | EGTDG                        | 803.4 | VEGTD GMI                  | 1216.6               | GGuITL LQVEG-28                   | 1720.9 | LuATG GuITLL QVE-28                  | 2607.3 | a <sub>23</sub> -NH <sub>3</sub>                         |
| 461.2               | LuA                          | 803.5 | GGuITL L-28                | 1226.6               | GGuITL LQVEG-H <sub>2</sub> O     | 1720.9 | TLuATG GuITLL QV                     | 2609.3 | y <sub>23</sub> -H <sub>2</sub> O                        |
| 462.2               | GTDGM                        | 805.4 | LTLuAT G-28                | 1227.6               | GGuITL LQVEG-NH <sub>3</sub>      | 1721.8 | TGGuIT LLQVE GTDGM -28               | 2610.3 | y <sub>23</sub> -NH <sub>3</sub>                         |
| 463.2               | uIT-28                       | 811.3 | uATGG u-28                 | 1229.6               | y <sub>12</sub> -H <sub>2</sub> O | 1721.9 | b <sub>14</sub>                      | 2624.3 | a <sub>23</sub>                                          |
| 463.2               | TLu-28                       | 813.4 | GGuITL L-H <sub>2</sub> O  | 1230.6               | y <sub>12</sub> -NH <sub>3</sub>  | 1730.9 | LuATG GuITLL QVE-H <sub>2</sub> O    | 2627.3 | y <sub>23</sub>                                          |
| 464.2               | TGGu-28                      | 814.5 | TLLQVE GT-28               | 1230.6               | TLLQVE GTDGM I-28                 | 1731.8 | TGGuIT LLQVE GTDGM -H <sub>2</sub> O | 2634.3 | b <sub>23</sub> -H <sub>2</sub> O                        |
| 470.3               | LQVE                         | 815.4 | LTLuAT G-H <sub>2</sub> O  | 1230.6               | ITLLQV EGTDM-28                   | 1731.9 | LuATG GuITLL QVE-NH <sub>3</sub>     | 2635.3 | b <sub>23</sub> -NH <sub>3</sub>                         |
| 473.2               | uIT-H <sub>2</sub> O         | 817.5 | uITLLQ-28                  | 1230.7               | ATGGuITLLQV                       | 1732.8 | TGGuIT LLQVE GTDGM -NH <sub>3</sub>  | 2652.3 | b <sub>23</sub>                                          |
| 473.2               | TLu-H <sub>2</sub> O         | 818.3 | QVEGT DGM                  | 1231.6               | uITLLQ VEGT                       | 1733.9 | GuITLL QVEGT DGMIG-                  | 2664.3 | a <sub>24</sub> -NH <sub>3</sub>                         |

|       |                                     |       |                                 |                      |                                                   |        |                                          |        |                                      |
|-------|-------------------------------------|-------|---------------------------------|----------------------|---------------------------------------------------|--------|------------------------------------------|--------|--------------------------------------|
|       |                                     |       |                                 |                      |                                                   |        | <b>28</b>                                |        |                                      |
| 474.2 | <b>TGGu-H<sub>2</sub>O</b>          | 819.4 | <b>TGGuITL</b>                  | 1239.6               | <b>TLuATG GuIT-28</b>                             | 1733.9 | <b>GGuITL LQVEG TDGMI-28</b>             | 2681.3 | <b>a<sub>24</sub></b>                |
| 474.2 | <b>DGMIG</b>                        | 821.3 | <b>uATGG u-H<sub>2</sub>O</b>   | 1240.6               | <b>ITLLQV EGTDM M-H<sub>2</sub>O</b>              | 1734.9 | <b>LTLuAT GGuITL LQ</b>                  | 2691.3 | <b>b<sub>24</sub>-H<sub>2</sub>O</b> |
| 474.2 | <b>VEGTD-28</b>                     | 824.5 | <b>TLLQVE GT-H<sub>2</sub>O</b> | 1240.6               | <b>TLLQVE GTDGM I-H<sub>2</sub>O</b>              | 1743.8 | <b>GuITLL QVEGT DGMIG-H<sub>2</sub>O</b> | 2692.3 | <b>b<sub>24</sub>-NH<sub>3</sub></b> |
| 476.2 | <b>GGuI-28</b>                      | 825.4 | <b>TLLQVE GT-NH<sub>3</sub></b> | 1241.6               | <b>TLLQVE GTDGM I-NH<sub>3</sub></b>              | 1743.8 | <b>GGuITL LQVEG TDGMI-H<sub>2</sub>O</b> | 2709.3 | <b>b<sub>24</sub></b>                |
| 478.2 | <b>uATG-28</b>                      | 826.5 | <b>ITLLQV EG-28</b>             | 1241.6               | <b>ITLLQV EGTDM M-NH<sub>3</sub></b>              | 1744.8 | <b>GGuITL LQVEG TDGMI-NH<sub>3</sub></b> | 2722.4 | <b>y<sub>24</sub>-H<sub>2</sub>O</b> |
| 484.2 | <b>VEGTD-H<sub>2</sub>O</b>         | 827.5 | <b>uITLLQ-H<sub>2</sub>O</b>    | 1244.6               | <b>GGuITL LQVEG</b>                               | 1744.8 | <b>GuITLL QVEGT DGMIG-NH<sub>3</sub></b> | 2723.4 | <b>y<sub>24</sub>-NH<sub>3</sub></b> |
| 487.3 | <b>QVEGT-28</b>                     | 828.4 | <b>uITLLQ-NH<sub>3</sub></b>    | 1247.6               | <b>y<sub>12</sub></b>                             | 1748.9 | <b>LuATG GuITLL QVE</b>                  | 2740.4 | <b>y<sub>24</sub></b>                |
| 488.2 | <b>uATG-H<sub>2</sub>O</b>          | 828.4 | <b>LLQVE GTD-28</b>             | 1249.6               | <b>TLuATG GuIT-H<sub>2</sub>O</b>                 | 1749.8 | <b>TGGuIT LLQVE GTDGM</b>                | 2837.4 | <b>MH-H<sub>2</sub>O</b>             |
| 488.3 | <b>y<sub>5</sub>-NH<sub>3</sub></b> | 831.4 | <b>GGuITL L</b>                 | 1251.6               | <b>uATGG uITLL-28</b>                             | 1761.9 | <b>GuITLL QVEGT DGMIG</b>                | 2838.4 | <b>MH-NH<sub>3</sub></b>             |
| 490.2 | <b>TDGMI-28</b>                     | 832.4 | <b>VEGTD GMIG-28</b>            | 1251.6               | <b>LuATG GuITL-28</b>                             | 1761.9 | <b>GGuITL LQVEG TDGMI</b>                | 2855.4 | <b>MH</b>                            |
| 491.2 | <b>uIT</b>                          | 833.4 | <b>LTLuAT G</b>                 | 1251.6               | <b>LTLuAT GGul-28</b>                             | 1765.9 | <b>uATGGuITLLQVEGT-28</b>                |        |                                      |
| 491.2 | <b>TLu</b>                          | 836.5 | <b>ITLLQV EG-H<sub>2</sub>O</b> | 1253.6               | <b>a<sub>10</sub></b>                             | 1775.9 | <b>uATGGuITLLQVEGT-H<sub>2</sub>O</b>    |        |                                      |
| 492.2 | <b>TGGu</b>                         | 837.5 | <b>ITLLQV EG-NH<sub>3</sub></b> | 1254.6 <sup>+2</sup> | <b>y<sub>22</sub>-H<sub>2</sub>O<sup>+2</sup></b> | 1776.8 | <b>uATGGuITLLQVEGT-NH<sub>3</sub></b>    |        |                                      |



# DLTLNATGGNITLLQVEGTDGMIGK

## MS/MS on C13 isotope

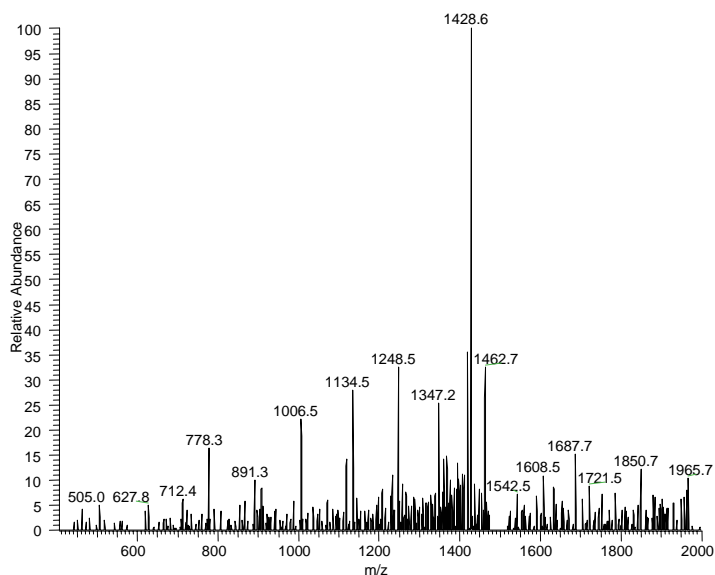

|                    |                                                  |       |                                   |       |                                           |        |                                              |        |                                                |
|--------------------|--------------------------------------------------|-------|-----------------------------------|-------|-------------------------------------------|--------|----------------------------------------------|--------|------------------------------------------------|
| 65.6 <sup>+2</sup> | <b>y<sub>1</sub>-NH<sub>3</sub><sup>+2</sup></b> | 515.2 | <b>QVEGT</b>                      | 889.4 | <b>y<sub>9</sub>-H<sub>2</sub>O</b>       | 1310.6 | <b>TLvATG<br/>GuI-H<sub>2</sub>O</b>         | 1865.9 | <b>b<sub>14</sub>-H<sub>2</sub>O</b>           |
| 72.1               | <b>V</b>                                         | 518.2 | <b>TDGMI</b>                      | 890.4 | <b>y<sub>9</sub>-NH<sub>3</sub></b>       | 1310.6 | <b>LTLvAT<br/>GGu-<br/>H<sub>2</sub>O</b>    | 1865.9 | <b>TLvATG<br/>GuITLL<br/>QV-NH<sub>3</sub></b> |
| 74.1               | <b>T</b>                                         | 520.3 | <b>GuIT-28</b>                    | 890.4 | <b>ATGGuI<br/>TL</b>                      | 1315.7 | <b>TLLQVE<br/>GTDGM<br/>IG</b>               | 1869.0 | <b>LTLvAT<br/>GGuITL<br/>LQ-28</b>             |
| 74.1 <sup>+2</sup> | <b>y<sub>1</sub><sup>+2</sup></b>                | 524.2 | <b>Lv-28</b>                      | 895.5 | <b>LLQVE<br/>GTDG-<br/>H<sub>2</sub>O</b> | 1317.7 | <b>TGGuIT<br/>LLQVE<br/>G-28</b>             | 1878.9 | <b>LTLvAT<br/>GGuITL<br/>LQ-H<sub>2</sub>O</b> |
| 84.1               | <b>Q</b>                                         | 527.3 | <b>LQVEG</b>                      | 896.4 | <b>LLQVE<br/>GTDG-<br/>NH<sub>3</sub></b> | 1317.7 | <b>GGuITL<br/>LQVEG<br/>T-28</b>             | 1879.9 | <b>LTLvAT<br/>GGuITL<br/>LQ-NH<sub>3</sub></b> |
| 84.1               | <b>K</b>                                         | 527.4 | <b>TLLQV-<br/>28</b>              | 902.5 | <b>GuITLL<br/>Q</b>                       | 1318.7 | <b>uITLLQ<br/>VEGTD-<br/>28</b>              | 1882.9 | <b>TLvATG<br/>GuITLL<br/>QV</b>                |
| 86.1               | <b>L</b>                                         | 530.2 | <b>GuIT-<br/>H<sub>2</sub>O</b>   | 903.4 | <b>QVEGT<br/>DGMI-<br/>28</b>             | 1327.7 | <b>GGuITL<br/>LQVEG<br/>T-H<sub>2</sub>O</b> | 1882.9 | <b>LvATG<br/>GuITLL<br/>QVE-28</b>             |
| 86.1               | <b>I</b>                                         | 531.2 | <b>VEGTD<br/>G-28</b>             | 903.4 | <b>LQVEG<br/>TDGM-<br/>28</b>             | 1327.7 | <b>TGGuIT<br/>LLQVE<br/>G-H<sub>2</sub>O</b> | 1883.9 | <b>b<sub>14</sub></b>                          |
| 87.1               | <b>GG-28</b>                                     | 535.2 | <b>ATGGu-<br/>28</b>              | 904.5 | <b>TGGuIT<br/>LL-28</b>                   | 1328.6 | <b>vATGG<br/>uITL</b>                        | 1890.0 | <b>y<sub>17</sub>-H<sub>2</sub>O</b>           |
| 88.0               | <b>D</b>                                         | 537.3 | <b>TLLQV-<br/>H<sub>2</sub>O</b>  | 907.4 | <b>y<sub>9</sub></b>                      | 1328.6 | <b>LvATG<br/>GuIT</b>                        | 1890.9 | <b>y<sub>17</sub>-NH<sub>3</sub></b>           |
| 94.1 <sup>+2</sup> | <b>y<sub>2</sub>-NH<sub>3</sub><sup>+2</sup></b> | 538.3 | <b>TLLQV-<br/>NH<sub>3</sub></b>  | 910.5 | <b>LTLvAT<br/>-28</b>                     | 1328.6 | <b>TLvATG<br/>GuI</b>                        | 1891.9 | <b>TGGuIT<br/>LLQVE<br/>GTDGM<br/>IG-28</b>    |
| 101.1              | <b>Q</b>                                         | 541.2 | <b>VEGTD<br/>G-H<sub>2</sub>O</b> | 911.4 | <b>TLvATG<br/>G-28</b>                    | 1328.6 | <b>LTLvAT<br/>GGu</b>                        | 1892.9 | <b>LvATG<br/>GuITLL<br/>QVE-</b>               |

|                     |                                     |                     |                                                                   |                            |                                                                   |                      |                                                                   |        |                                                         |
|---------------------|-------------------------------------|---------------------|-------------------------------------------------------------------|----------------------------|-------------------------------------------------------------------|----------------------|-------------------------------------------------------------------|--------|---------------------------------------------------------|
|                     |                                     |                     |                                                                   |                            |                                                                   |                      |                                                                   |        | H <sub>2</sub> O                                        |
| 101.1               | <b>K</b>                            | 541.4               | <b>ITLLQ-28</b>                                                   | 913.4                      | <b>QVEGT<br/>DGMI-<br/>H<sub>2</sub>O</b>                         | 1328.7               | <b>TGGuIT<br/>LLQVE<br/>G-NH<sub>3</sub></b>                      | 1893.9 | <b>LvATG<br/>GuITLL<br/>QVE-<br/>NH<sub>3</sub></b>     |
| 102.1               | <b>E</b>                            | 545.2               | <b>ATGGu-<br/>H<sub>2</sub>O</b>                                  | 913.4                      | <b>LQVEG<br/>TDGM-<br/>H<sub>2</sub>O</b>                         | 1328.7               | <b>GGuITL<br/>LQVEG<br/>T-NH<sub>3</sub></b>                      | 1897.0 | <b>LTLvAT<br/>GGuITL<br/>LQ</b>                         |
| 102.6 <sup>+2</sup> | <b>y<sub>2</sub><sup>+2</sup></b>   | 547.3               | <b>GTDGM<br/>I-28</b>                                             | 913.5                      | <b>LLQVE<br/>GTDG</b>                                             | 1328.7               | <b>uITLLQ<br/>VEGTD-<br/>H<sub>2</sub>O</b>                       | 1901.9 | <b>TGGuIT<br/>LLQVE<br/>GTDGM<br/>IG-H<sub>2</sub>O</b> |
| 104.1               | <b>M</b>                            | 547.3               | <b>TDGMI<br/>G-28</b>                                             | 914.4                      | <b>QVEGT<br/>DGMI-<br/>NH<sub>3</sub></b>                         | 1329.6               | <b>uITLLQ<br/>VEGTD-<br/>NH<sub>3</sub></b>                       | 1902.9 | <b>TGGuIT<br/>LLQVE<br/>GTDGM<br/>IG-NH<sub>3</sub></b> |
| 115.1               | <b>GG</b>                           | 548.3               | <b>GuIT</b>                                                       | 914.4                      | <b>LQVEG<br/>TDGM-<br/>NH<sub>3</sub></b>                         | 1331.7               | <b>ATGGuI<br/>TLLQVE<br/>-28</b>                                  | 1905.9 | <b>ATGGuI<br/>TLLQVE<br/>GTDGM<br/>I-28</b>             |
| 126.1               | <b>K</b>                            | 551.4               | <b>ITLLQ-<br/>H<sub>2</sub>O</b>                                  | 914.5                      | <b>TGGuIT<br/>LL-H<sub>2</sub>O</b>                               | 1335.7 <sup>+2</sup> | <b>y<sub>22</sub><sup>-</sup><br/>H<sub>2</sub>O<sup>+2</sup></b> | 1908.0 | <b>y<sub>17</sub></b>                                   |
| 129.1               | <b>Q</b>                            | 552.2               | <b>Lv</b>                                                         | 916.5                      | <b>uITLLQ<br/>V-28</b>                                            | 1336.1 <sup>+2</sup> | <b>y<sub>22</sub><sup>-</sup><br/>NH<sub>3</sub><sup>+2</sup></b> | 1910.9 | <b>LvATG<br/>GuITLL<br/>QVE</b>                         |
| 129.1               | <b>K</b>                            | 552.3               | <b>ITLLQ-<br/>NH<sub>3</sub></b>                                  | 916.969<br>1 <sup>+2</sup> | <b>y<sub>16</sub><sup>-</sup><br/>H<sub>2</sub>O<sup>+2</sup></b> | 1341.7               | <b>ATGGuI<br/>TLLQVE<br/>-H<sub>2</sub>O</b>                      | 1915.9 | <b>ATGGuI<br/>TLLQVE<br/>GTDGM<br/>I-H<sub>2</sub>O</b> |
| 130.1               | <b>y<sub>1</sub>-NH<sub>3</sub></b> | 555.4               | <b>TLLQV</b>                                                      | 917.461<br>1 <sup>+2</sup> | <b>y<sub>16</sub><sup>-</sup><br/>NH<sub>3</sub><sup>+2</sup></b> | 1342.7               | <b>ATGGuI<br/>TLLQVE<br/>-NH<sub>3</sub></b>                      | 1916.9 | <b>ATGGuI<br/>TLLQVE<br/>GTDGM<br/>I-NH<sub>3</sub></b> |
| 131.1               | <b>GT-28</b>                        | 555.4               | <b>LLQVE-<br/>28</b>                                              | 920.4                      | <b>LTLvAT<br/>-H<sub>2</sub>O</b>                                 | 1342.7               | <b>y<sub>13</sub>-H<sub>2</sub>O</b>                              | 1919.9 | <b>TGGuIT<br/>LLQVE<br/>GTDGM<br/>IG</b>                |
| 131.1               | <b>TG-28</b>                        | 557.2               | <b>TDGMI<br/>G-H<sub>2</sub>O</b>                                 | 921.4                      | <b>TLvATG<br/>G-H<sub>2</sub>O</b>                                | 1343.7               | <b>y<sub>13</sub>-NH<sub>3</sub></b>                              | 1927.9 | <b>vATGG<br/>uITLLQ<br/>VEGT-<br/>28</b>                |
| 141.1               | <b>GT-H<sub>2</sub>O</b>            | 557.2               | <b>GTDGM<br/>I-H<sub>2</sub>O</b>                                 | 924.4                      | <b>a<sub>6</sub></b>                                              | 1343.7               | <b>ITLLQV<br/>EGTDG<br/>MI-28</b>                                 | 1933.9 | <b>ATGGuI<br/>TLLQVE<br/>GTDGM<br/>I</b>                |
| 141.1               | <b>TG-H<sub>2</sub>O</b>            | 558.8 <sup>+2</sup> | <b>y<sub>11</sub><sup>-</sup><br/>H<sub>2</sub>O<sup>+2</sup></b> | 925.974<br>4 <sup>+2</sup> | <b>y<sub>16</sub><sup>+2</sup></b>                                | 1344.7 <sup>+2</sup> | <b>y<sub>22</sub><sup>+2</sup></b>                                | 1937.9 | <b>vATGG<br/>uITLLQ<br/>VEGT-<br/>H<sub>2</sub>O</b>    |
| 143.1               | <b>IG-28</b>                        | 559.2               | <b>VEGTD<br/>G</b>                                                | 926.5                      | <b>uITLLQ<br/>V-H<sub>2</sub>O</b>                                | 1345.7               | <b>TGGuIT<br/>LLQVE<br/>G</b>                                     | 1938.9 | <b>vATGG<br/>uITLLQ<br/>VEGT-<br/>NH<sub>3</sub></b>    |

|                     |                                                  |                     |                                                               |       |                                     |                      |                                                               |        |                                             |
|---------------------|--------------------------------------------------|---------------------|---------------------------------------------------------------|-------|-------------------------------------|----------------------|---------------------------------------------------------------|--------|---------------------------------------------|
| 145.1               | <b>DG-28</b>                                     | 559.3 <sup>+2</sup> | <b>y<sub>11</sub><sup>-</sup>-NH<sub>3</sub><sup>+2</sup></b> | 927.5 | <b>uITLLQ V-NH<sub>3</sub></b>      | 1345.7               | <b>GGuITL LQVEGT</b>                                          | 1940.0 | <b>LvATG GuITLL QVEG-28</b>                 |
| 145.1               | <b>AT-28</b>                                     | 563.2               | <b>EGTDG M-28</b>                                             | 927.6 | <b>ITLLQV EGT-28</b>                | 1346.7               | <b>uITLLQ VEGTD</b>                                           | 1947.0 | <b>y<sub>18</sub>-H<sub>2</sub>O</b>        |
| 147.1               | <b>y<sub>1</sub></b>                             | 563.2               | <b>ATGGu</b>                                                  | 929.5 | <b>TLLQVE GTD-28</b>                | 1353.7               | <b>ITLLQV EGTDG MI-H<sub>2</sub>O</b>                         | 1948.0 | <b>y<sub>18</sub>-NH<sub>3</sub></b>        |
| 150.6 <sup>+2</sup> | <b>y<sub>3</sub>-NH<sub>3</sub><sup>+2</sup></b> | 565.3               | <b>LLQVE-H<sub>2</sub>O</b>                                   | 931.4 | <b>QVEGT DGMI</b>                   | 1354.7               | <b>ITLLQV EGTDG MI-NH<sub>3</sub></b>                         | 1949.9 | <b>LvATG GuITLL QVEG-H<sub>2</sub>O</b>     |
| 155.0               | <b>DG-H<sub>2</sub>O</b>                         | 566.3               | <b>LLQVE-NH<sub>3</sub></b>                                   | 931.4 | <b>LQVEG TDGM</b>                   | 1359.7               | <b>ATGGuITLLQVE</b>                                           | 1950.9 | <b>LvATG GuITLL QVEG-NH<sub>3</sub></b>     |
| 155.1               | <b>AT-H<sub>2</sub>O</b>                         | 567.8 <sup>+2</sup> | <b>y<sub>11</sub><sup>+2</sup></b>                            | 931.5 | <b>GGuITL LQ-28</b>                 | 1360.7               | <b>y<sub>13</sub></b>                                         | 1955.9 | <b>vATGG uITLLQ VEGT</b>                    |
| 159.1               | <b>GT</b>                                        | 569.4               | <b>ITLLQ</b>                                                  | 932.5 | <b>TGGuITLL</b>                     | 1371.7               | <b>ITLLQV EGTDG MI</b>                                        | 1963.0 | <b>ATGGuITLLQVE GTDGM IG-28</b>             |
| 159.1               | <b>TG</b>                                        | 573.2               | <b>EGTDG M-H<sub>2</sub>O</b>                                 | 934.4 | <b>b<sub>6</sub>-H<sub>2</sub>O</b> | 1375.7               | <b>GuITLL QVEGT D-28</b>                                      | 1965.0 | <b>y<sub>18</sub></b>                       |
| 159.1               | <b>EG-28</b>                                     | 575.2               | <b>GTDGM I</b>                                                | 937.5 | <b>ITLLQV EGT-H<sub>2</sub>O</b>    | 1375.7               | <b>uITLLQ VEGTD G-28</b>                                      | 1967.0 | <b>a<sub>15</sub>-NH<sub>3</sub></b>        |
| 159.1 <sup>+2</sup> | <b>y<sub>3</sub><sup>+2</sup></b>                | 575.2               | <b>TDGMI G</b>                                                | 938.5 | <b>LTLvAT</b>                       | 1385.7               | <b>GuITLL QVEGT D-H<sub>2</sub>O</b>                          | 1968.0 | <b>LvATG GuITLL QVEG</b>                    |
| 161.1               | <b>GM-28</b>                                     | 576.3               | <b>uITL-28</b>                                                | 938.5 | <b>ITLLQV EGT-NH<sub>3</sub></b>    | 1385.7               | <b>uITLLQ VEGTD G-H<sub>2</sub>O</b>                          | 1968.0 | <b>LTLvAT GGuITL LQV-28</b>                 |
| 169.1               | <b>EG-H<sub>2</sub>O</b>                         | 577.3               | <b>GGuIT-28</b>                                               | 939.4 | <b>TLvATG G</b>                     | 1386.2 <sup>+2</sup> | <b>y<sub>23</sub><sup>-</sup>-H<sub>2</sub>O<sup>+2</sup></b> | 1973.0 | <b>ATGGuITLLQVE GTDGM IG-H<sub>2</sub>O</b> |
| 171.1               | <b>IG</b>                                        | 577.3               | <b>TGGuIT-28</b>                                              | 939.5 | <b>TLLQVE GTD-H<sub>2</sub>O</b>    | 1386.7               | <b>GuITLL QVEGT D-NH<sub>3</sub></b>                          | 1973.9 | <b>ATGGuITLLQVE GTDGM IG-NH<sub>3</sub></b> |
| 173.1               | <b>DG</b>                                        | 583.2               | <b>vAT-28</b>                                                 | 940.5 | <b>TLLQVE GTD-NH<sub>3</sub></b>    | 1386.7               | <b>uITLLQ VEGTD G-NH<sub>3</sub></b>                          | 1978.0 | <b>LTLvAT GGuITL LQV-H<sub>2</sub>O</b>     |
| 173.1               | <b>AT</b>                                        | 583.3               | <b>LLQVE</b>                                                  | 941.5 | <b>GGuITL LQ-H<sub>2</sub>O</b>     | 1386.7 <sup>+2</sup> | <b>y<sub>23</sub><sup>-</sup>-NH<sub>3</sub><sup>+2</sup></b> | 1979.0 | <b>LTLvAT GGuITL LQV-NH<sub>3</sub></b>     |
| 187.1               | <b>EG</b>                                        | 586.3               | <b>uITL-H<sub>2</sub>O</b>                                    | 942.5 | <b>GGuITL LQ-NH<sub>3</sub></b>     | 1388.7               | <b>ATGGuITLLQVE G-28</b>                                      | 1984.0 | <b>a<sub>15</sub></b>                       |

|       |                           |       |                                     |                            |                                            |                      |                                                     |        |                                                       |
|-------|---------------------------|-------|-------------------------------------|----------------------------|--------------------------------------------|----------------------|-----------------------------------------------------|--------|-------------------------------------------------------|
| 187.1 | $y_2\text{-NH}_3$         | 587.3 | <b>GGuIT-H<sub>2</sub>O</b>         | 944.5                      | <b>uITLLQV</b>                             | 1395.2 <sup>+2</sup> | $y_{23}^{+2}$                                       | 1984.0 | <b>TLvATG<br/>GuITLL<br/>QVE-28</b>                   |
| 187.1 | <b>IT-28</b>              | 587.3 | <b>TGGuI-H<sub>2</sub>O</b>         | 945.479<br>9 <sup>+2</sup> | $y_{17}\text{-H}_2\text{O}^{+2}$           | 1398.7               | <b>ATGGuI<br/>TLLQVE<br/>G-H<sub>2</sub>O</b>       | 1991.0 | <b>ATGGuI<br/>TLLQVE<br/>GTDGM<br/>IG</b>             |
| 187.1 | <b>TL-28</b>              | 591.2 | <b>EGTDGM</b>                       | 945.971<br>9 <sup>+2</sup> | $y_{17}\text{-NH}_3^{+2}$                  | 1399.7               | <b>ATGGuI<br/>TLLQVE<br/>G-NH<sub>3</sub></b>       | 1994.0 | <b>TLvATG<br/>GuITLL<br/>QVE-<br/>H<sub>2</sub>O</b>  |
| 187.1 | <b>LT-28</b>              | 593.2 | <b>vAT-H<sub>2</sub>O</b>           | 952.4                      | <b>b<sub>6</sub></b>                       | 1400.7               | <b>ITLLQV<br/>EGTDG<br/>MIG-28</b>                  | 1994.0 | <b>b<sub>15</sub>-H<sub>2</sub>O</b>                  |
| 188.1 | <b>TGG-28</b>             | 595.3 | <b>LvA-28</b>                       | 954.485<br>2 <sup>+2</sup> | $y_{17}^{+2}$                              | 1401.6               | <b>TLvATG<br/>GuIT-28</b>                           | 1995.0 | <b>TLvATG<br/>GuITLL<br/>QVE-<br/>NH<sub>3</sub></b>  |
| 189.1 | <b>GM</b>                 | 600.3 | <b>LQVEGT-28</b>                    | 955.5                      | <b>ITLLQV<br/>EGT</b>                      | 1403.7               | <b>GuITLL<br/>QVEGT<br/>D</b>                       | 1995.0 | <b>b<sub>15</sub>-NH<sub>3</sub></b>                  |
| 189.1 | <b>TD-28</b>              | 602.3 | <b>QVEGTD-28</b>                    | 957.5                      | <b>TLLQVE<br/>GTD</b>                      | 1403.7               | <b>uITLLQ<br/>VEGTD<br/>G</b>                       | 1996.0 | <b>LTLvAT<br/>GGuITL<br/>LQV</b>                      |
| 197.1 | <b>IT-H<sub>2</sub>O</b>  | 602.3 | <b>y<sub>6</sub>-H<sub>2</sub>O</b> | 959.5                      | <b>GGuITL<br/>LQ</b>                       | 1410.7               | <b>ITLLQV<br/>EGTDG<br/>MIG-<br/>H<sub>2</sub>O</b> | 2012.0 | <b>TLvATG<br/>GuITLL<br/>QVE</b>                      |
| 197.1 | <b>LT-H<sub>2</sub>O</b>  | 603.3 | <b>y<sub>6</sub>-NH<sub>3</sub></b> | 960.4                      | <b>QVEGT<br/>DGMIG-<br/>28</b>             | 1411.6               | <b>TLvATG<br/>GuIT-<br/>H<sub>2</sub>O</b>          | 2012.0 | <b>b<sub>15</sub></b>                                 |
| 197.1 | <b>TL-H<sub>2</sub>O</b>  | 604.3 | <b>GTDGMIG-28</b>                   | 967.5                      | <b>LTLvAT<br/>G-28</b>                     | 1411.7               | <b>ITLLQV<br/>EGTDG<br/>MIG-<br/>NH<sub>3</sub></b> | 2041.0 | <b>LvATG<br/>GuITLL<br/>QVEGT-<br/>28</b>             |
| 198.1 | <b>TGG-H<sub>2</sub>O</b> | 604.3 | <b>uITL</b>                         | 970.4                      | <b>QVEGT<br/>DGMIG-<br/>H<sub>2</sub>O</b> | 1413.7               | <b>vATGG<br/>uITLL-<br/>28</b>                      | 2041.0 | <b>TLvATG<br/>GuITLL<br/>QVEG-<br/>28</b>             |
| 199.1 | <b>TD-H<sub>2</sub>O</b>  | 605.3 | <b>GGuIT</b>                        | 971.4                      | <b>QVEGT<br/>DGMIG-<br/>NH<sub>3</sub></b> | 1413.7               | <b>LvATG<br/>GuITL-<br/>28</b>                      | 2042.9 | <b>vATGG<br/>uITLLQ<br/>VEGTD-<br/>28</b>             |
| 199.2 | <b>LL-28</b>              | 605.3 | <b>TGGuI</b>                        | 973.4                      | <b>vATGG<br/>u-28</b>                      | 1413.7               | <b>LTLvAT<br/>GGuI-28</b>                           | 2048.0 | <b>y<sub>19</sub>-H<sub>2</sub>O</b>                  |
| 200.1 | <b>QV-28</b>              | 610.3 | <b>LQVEGT-H<sub>2</sub>O</b>        | 973.6                      | <b>GuITLL<br/>QV-28</b>                    | 1415.6               | <b>a<sub>10</sub></b>                               | 2049.0 | <b>y<sub>19</sub>-NH<sub>3</sub></b>                  |
| 201.1 | <b>a<sub>2</sub></b>      | 611.2 | <b>vAT</b>                          | 973.990<br>6 <sup>+2</sup> | $y_{18}\text{-H}_2\text{O}^{+2}$           | 1416.7               | <b>ATGGuI<br/>TLLQVE<br/>G</b>                      | 2051.0 | <b>LvATG<br/>GuITLL<br/>QVEGT-<br/>H<sub>2</sub>O</b> |
| 201.1 | <b>VE-28</b>              | 611.3 | <b>LQVEGT-NH<sub>3</sub></b>        | 974.482<br>6 <sup>+2</sup> | $y_{18}\text{-NH}_3^{+2}$                  | 1418.7               | <b>TGGuIT<br/>LLQVE<br/>GT-28</b>                   | 2051.0 | <b>TLvATG<br/>GuITLL<br/>QVEG-<br/>H<sub>2</sub>O</b> |
| 202.1 | <b>ATG-28</b>             | 612.3 | <b>QVEGTD-H<sub>2</sub>O</b>        | 975.5                      | <b>ATGGuI<br/>TLL-28</b>                   | 1423.7               | <b>vATGG<br/>uITLL-<br/>H<sub>2</sub>O</b>          | 2052.0 | <b>LvATG<br/>GuITLL<br/>QVEGT-<br/>NH<sub>3</sub></b> |

|                            |                                                  |                            |                                                                   |                     |                                            |                      |                                                                   |        |                                                        |
|----------------------------|--------------------------------------------------|----------------------------|-------------------------------------------------------------------|---------------------|--------------------------------------------|----------------------|-------------------------------------------------------------------|--------|--------------------------------------------------------|
| 204.1                      | <b>y<sub>2</sub></b>                             | 612.4                      | <b>LLQVE<br/>G-28</b>                                             | 977.5               | <b>LTLvAT<br/>G-H<sub>2</sub>O</b>         | 1423.7               | <b>LvATG<br/>GuITL-<br/>H<sub>2</sub>O</b>                        | 2052.0 | <b>TLvATG<br/>GuITLL<br/>QVEG-<br/>NH<sub>3</sub></b>  |
| 211.1                      | <b>b<sub>2</sub>-H<sub>2</sub>O</b>              | 613.2                      | <b>QVEGT<br/>D-NH<sub>3</sub></b>                                 | 983.0 <sup>+2</sup> | <b>y<sub>18</sub><sup>+2</sup></b>         | 1423.7               | <b>LTLvAT<br/>GGul-<br/>H<sub>2</sub>O</b>                        | 2052.9 | <b>vATGG<br/>uITLLQ<br/>VEGTD-<br/>H<sub>2</sub>O</b>  |
| 211.1                      | <b>VE-H<sub>2</sub>O</b>                         | 614.3                      | <b>GTDGM<br/>IG-H<sub>2</sub>O</b>                                | 983.4               | <b>vATGG<br/>u-H<sub>2</sub>O</b>          | 1425.6               | <b>b<sub>10</sub>-H<sub>2</sub>O</b>                              | 2053.9 | <b>vATGG<br/>uITLLQ<br/>VEGTD-<br/>NH<sub>3</sub></b>  |
| 211.1                      | <b>QV-NH<sub>3</sub></b>                         | 615.3 <sup>+2</sup>        | <b>y<sub>12</sub><sup>-</sup><br/>H<sub>2</sub>O<sup>+2</sup></b> | 983.5               | <b>GuITLL<br/>QV-H<sub>2</sub>O</b>        | 1428.7               | <b>TGGuIT<br/>LLQVE<br/>GT-H<sub>2</sub>O</b>                     | 2066.0 | <b>a<sub>16</sub>-NH<sub>3</sub></b>                   |
| 212.1                      | <b>ATG-<br/>H<sub>2</sub>O</b>                   | 615.8 <sup>+2</sup>        | <b>y<sub>12</sub><sup>-</sup><br/>NH<sub>3</sub><sup>+2</sup></b> | 984.5               | <b>GuITLL<br/>QV-NH<sub>3</sub></b>        | 1428.7               | <b>ITLLQV<br/>EGTDG<br/>MIG</b>                                   | 2066.0 | <b>y<sub>19</sub></b>                                  |
| 214.2                      | <b>LQ-28</b>                                     | 620.3                      | <b>y<sub>6</sub></b>                                              | 985.5               | <b>ATGGul<br/>TLL-<br/>H<sub>2</sub>O</b>  | 1429.6               | <b>TLvATG<br/>GuIT</b>                                            | 2069.0 | <b>LvATG<br/>GuITLL<br/>QVEGT</b>                      |
| 215.1                      | <b>IT</b>                                        | 622.4                      | <b>LLQVE<br/>G-H<sub>2</sub>O</b>                                 | 986.5               | <b>TLLQVE<br/>GTDG-<br/>28</b>             | 1429.7               | <b>TGGuIT<br/>LLQVE<br/>GT-NH<sub>3</sub></b>                     | 2069.0 | <b>TLvATG<br/>GuITLL<br/>QVEG</b>                      |
| 215.1                      | <b>TL</b>                                        | 623.3                      | <b>LvA</b>                                                        | 988.4               | <b>QVEGT<br/>DGMIG</b>                     | 1432.7               | <b>GGuITL<br/>LQVEG<br/>TD-28</b>                                 | 2070.9 | <b>vATGG<br/>uITLLQ<br/>VEGTD</b>                      |
| 215.1                      | <b>LT</b>                                        | 623.3                      | <b>LLQVE<br/>G-NH<sub>3</sub></b>                                 | 988.5               | <b>y<sub>10</sub>-H<sub>2</sub>O</b>       | 1432.7               | <b>GuITLL<br/>QVEGT<br/>DG-28</b>                                 | 2083.1 | <b>a<sub>16</sub></b>                                  |
| 216.1                      | <b>TGG</b>                                       | 624.318<br>6 <sup>+2</sup> | <b>y<sub>12</sub><sup>+2</sup></b>                                | 989.5               | <b>y<sub>10</sub>-NH<sub>3</sub></b>       | 1441.7               | <b>vATGG<br/>uITLL</b>                                            | 2093.0 | <b>b<sub>16</sub>-H<sub>2</sub>O</b>                   |
| 216.119<br>8 <sup>+2</sup> | <b>y<sub>4</sub>-NH<sub>3</sub><sup>+2</sup></b> | 625.3                      | <b>TLv-28</b>                                                     | 995.5               | <b>LTLvAT<br/>G</b>                        | 1441.7               | <b>LvATG<br/>GuITL</b>                                            | 2094.0 | <b>b<sub>16</sub>-NH<sub>3</sub></b>                   |
| 217.1                      | <b>TD</b>                                        | 628.3                      | <b>LQVEG<br/>T</b>                                                | 996.5               | <b>TLLQVE<br/>GTDG-<br/>H<sub>2</sub>O</b> | 1441.7               | <b>LTLvAT<br/>GGul</b>                                            | 2097.1 | <b>LTLvAT<br/>GGuITL<br/>LQVE-<br/>28</b>              |
| 217.1                      | <b>MI-28</b>                                     | 630.3                      | <b>QVEGT<br/>D</b>                                                | 997.5               | <b>TLLQVE<br/>GTDG-<br/>NH<sub>3</sub></b> | 1442.7               | <b>GGuITL<br/>LQVEG<br/>TD-H<sub>2</sub>O</b>                     | 2100.0 | <b>vATGG<br/>uITLLQ<br/>VEGTD<br/>G-28</b>             |
| 224.6 <sup>+2</sup>        | <b>y<sub>4</sub><sup>+2</sup></b>                | 632.3                      | <b>GTDGM<br/>IG</b>                                               | 1001.4              | <b>vATGG<br/>u</b>                         | 1442.7               | <b>GuITLL<br/>QVEGT<br/>DG-H<sub>2</sub>O</b>                     | 2107.1 | <b>LTLvAT<br/>GGuITL<br/>LQVE-<br/>H<sub>2</sub>O</b>  |
| 225.1                      | <b>LQ-NH<sub>3</sub></b>                         | 633.3                      | <b>GuITL-<br/>28</b>                                              | 1001.6              | <b>GuITLL<br/>QV</b>                       | 1442.7 <sup>+2</sup> | <b>y<sub>24</sub><sup>-</sup><br/>H<sub>2</sub>O<sup>+2</sup></b> | 2108.0 | <b>LTLvAT<br/>GGuITL<br/>LQVE-<br/>NH<sub>3</sub></b>  |
| 227.2                      | <b>LL</b>                                        | 635.3                      | <b>TLv-H<sub>2</sub>O</b>                                         | 1003.5              | <b>ATGGul<br/>TLL</b>                      | 1443.2 <sup>+2</sup> | <b>y<sub>24</sub><sup>-</sup><br/>NH<sub>3</sub><sup>+2</sup></b> | 2110.0 | <b>vATGG<br/>uITLLQ<br/>VEGTD<br/>G-H<sub>2</sub>O</b> |
| 228.1                      | <b>QV</b>                                        | 640.3                      | <b>vATG-<br/>28</b>                                               | 1006.5              | <b>y<sub>10</sub></b>                      | 1443.6               | <b>b<sub>10</sub></b>                                             | 2110.9 | <b>vATGG<br/>uITLLQ<br/>VEGTD<br/>G-NH<sub>3</sub></b> |

|                     |                                                  |       |                                   |                      |                                                        |                      |                                                     |        |                                                        |
|---------------------|--------------------------------------------------|-------|-----------------------------------|----------------------|--------------------------------------------------------|----------------------|-----------------------------------------------------|--------|--------------------------------------------------------|
| 229.1               | <b>b<sub>2</sub></b>                             | 640.4 | <b>LLQVE<br/>G</b>                | 1014.5               | <b>TLLQVE<br/>GTDG</b>                                 | 1443.7               | <b>GGuITL<br/>LQVEG<br/>TD-NH<sub>3</sub></b>       | 2111.0 | <b>b<sub>16</sub></b>                                  |
| 229.1               | <b>VE</b>                                        | 640.4 | <b>ITLLQV-<br/>28</b>             | 1016.5               | <b>LQVEG<br/>TDGMI-<br/>28</b>                         | 1443.7               | <b>GuITLL<br/>QVEGT<br/>DG-NH<sub>3</sub></b>       | 2119.1 | <b>y<sub>20</sub>-H<sub>2</sub>O</b>                   |
| 230.1               | <b>ATG</b>                                       | 643.3 | <b>GuITL-<br/>H<sub>2</sub>O</b>  | 1016.5               | <b>LLQVE<br/>GTDGM<br/>-28</b>                         | 1443.8               | <b>y<sub>14</sub>-H<sub>2</sub>O</b>                | 2120.0 | <b>y<sub>20</sub>-NH<sub>3</sub></b>                   |
| 242.1               | <b>LQ</b>                                        | 648.3 | <b>ATGGuI<br/>-28</b>             | 1024.5               | <b>LTLvAT<br/>GG-28</b>                                | 1444.7               | <b>y<sub>14</sub>-NH<sub>3</sub></b>                | 2125.1 | <b>LTLvAT<br/>GGuITL<br/>LQVE</b>                      |
| 244.6 <sup>+2</sup> | <b>y<sub>5</sub>-NH<sub>3</sub><sup>+2</sup></b> | 650.3 | <b>vATG-<br/>H<sub>2</sub>O</b>   | 1024.5 <sup>+2</sup> | <b>y<sub>19</sub>-<br/>H<sub>2</sub>O<sup>+2</sup></b> | 1446.7               | <b>TGGuIT<br/>LLQVE<br/>GT</b>                      | 2128.0 | <b>vATGG<br/>uITLLQ<br/>VEGTD<br/>G</b>                |
| 245.1               | <b>MI</b>                                        | 650.4 | <b>ITLLQV-<br/>H<sub>2</sub>O</b> | 1025.0 <sup>+2</sup> | <b>y<sub>19</sub>-<br/>NH<sub>3</sub><sup>+2</sup></b> | 1451.7 <sup>+2</sup> | <b>y<sub>24</sub><sup>+2</sup></b>                  | 2137.1 | <b>y<sub>20</sub></b>                                  |
| 246.1               | <b>TDG-28</b>                                    | 651.4 | <b>ITLLQV-<br/>NH<sub>3</sub></b> | 1025.5               | <b>a<sub>7</sub></b>                                   | 1460.7               | <b>GGuITL<br/>LQVEG<br/>TD</b>                      | 2142.1 | <b>TLvATG<br/>GuITLL<br/>QVEGT-<br/>28</b>             |
| 246.1               | <b>GTD-28</b>                                    | 653.3 | <b>TLv</b>                        | 1026.5               | <b>LLQVE<br/>GTDGM<br/>-H<sub>2</sub>O</b>             | 1460.7               | <b>GuITLL<br/>QVEGT<br/>DG</b>                      | 2152.0 | <b>TLvATG<br/>GuITLL<br/>QVEGT-<br/>H<sub>2</sub>O</b> |
| 253.1 <sup>+2</sup> | <b>y<sub>5</sub><sup>+2</sup></b>                | 656.4 | <b>TLLQVE<br/>-28</b>             | 1026.5               | <b>LQVEG<br/>TDGMI-<br/>H<sub>2</sub>O</b>             | 1461.8               | <b>y<sub>14</sub></b>                               | 2153.0 | <b>TLvATG<br/>GuITLL<br/>QVEGT-<br/>NH<sub>3</sub></b> |
| 256.1               | <b>TDG-<br/>H<sub>2</sub>O</b>                   | 658.3 | <b>ATGGuI<br/>-H<sub>2</sub>O</b> | 1027.5               | <b>LLQVE<br/>GTDGM<br/>-NH<sub>3</sub></b>             | 1489.7               | <b>GGuITL<br/>LQVEG<br/>TDG-28</b>                  | 2154.1 | <b>LTLvAT<br/>GGuITL<br/>LQVEG-<br/>28</b>             |
| 256.1               | <b>GTD-<br/>H<sub>2</sub>O</b>                   | 659.3 | <b>QVEGT<br/>DG-28</b>            | 1027.5               | <b>LQVEG<br/>TDGMI-<br/>NH<sub>3</sub></b>             | 1489.8               | <b>ATGGuI<br/>TLLQVE<br/>GT-28</b>                  | 2156.0 | <b>LvATG<br/>GuITLL<br/>QVEGT<br/>D-28</b>             |
| 258.1               | <b>VEG-28</b>                                    | 661.3 | <b>GuITL</b>                      | 1030.6               | <b>GGuITL<br/>LQV-28</b>                               | 1499.7               | <b>GGuITL<br/>LQVEG<br/>TDG-<br/>H<sub>2</sub>O</b> | 2164.1 | <b>LTLvAT<br/>GGuITL<br/>LQVEG-<br/>H<sub>2</sub>O</b> |
| 259.1               | <b>ATGG-<br/>28</b>                              | 662.3 | <b>VEGTD<br/>GM-28</b>            | 1032.6               | <b>TGGuIT<br/>LLQ-28</b>                               | 1499.8               | <b>ATGGuI<br/>TLLQVE<br/>GT-H<sub>2</sub>O</b>      | 2165.1 | <b>LTLvAT<br/>GGuITL<br/>LQVEG-<br/>NH<sub>3</sub></b> |
| 260.1               | <b>EGT-28</b>                                    | 666.4 | <b>TLLQVE<br/>-H<sub>2</sub>O</b> | 1033.5 <sup>+2</sup> | <b>y<sub>19</sub><sup>+2</sup></b>                     | 1500.2 <sup>+2</sup> | <b>MH-<br/>H<sub>2</sub>O<sup>+2</sup></b>          | 2166.0 | <b>LvATG<br/>GuITLL<br/>QVEGT<br/>D-H<sub>2</sub>O</b> |
| 268.1               | <b>VEG-<br/>H<sub>2</sub>O</b>                   | 667.4 | <b>TLLQVE<br/>-NH<sub>3</sub></b> | 1034.5               | <b>LTLvAT<br/>GG-H<sub>2</sub>O</b>                    | 1500.7               | <b>GGuITL<br/>LQVEG<br/>TDG-<br/>NH<sub>3</sub></b> | 2167.0 | <b>LvATG<br/>GuITLL<br/>QVEGT<br/>D-NH<sub>3</sub></b> |
| 269.1               | <b>ATGG-<br/>H<sub>2</sub>O</b>                  | 668.3 | <b>vATG</b>                       | 1035.5               | <b>b<sub>7</sub>-H<sub>2</sub>O</b>                    | 1500.7 <sup>+2</sup> | <b>MH-<br/>NH<sub>3</sub><sup>+2</sup></b>          | 2170.0 | <b>TLvATG<br/>GuITLL<br/>QVEGT</b>                     |

|                     |                                                  |                            |                                                   |                      |                                                   |                      |                                       |        |                                             |
|---------------------|--------------------------------------------------|----------------------------|---------------------------------------------------|----------------------|---------------------------------------------------|----------------------|---------------------------------------|--------|---------------------------------------------|
| 270.1               | <b>EGT-H<sub>2</sub>O</b>                        | 668.4                      | <b>ITLLQV</b>                                     | 1040.6               | <b>GGuITL LQV-H<sub>2</sub>O</b>                  | 1500.7               | <b>ATGGuITLLQVE GT-NH<sub>3</sub></b> | 2182.1 | <b>LTLvAT GGuITL LQVEG</b>                  |
| 274.1               | <b>GTD</b>                                       | 669.3                      | <b>QVEGT DG-H<sub>2</sub>O</b>                    | 1041.5               | <b>GGuITL LQV-NH<sub>3</sub></b>                  | 1506.7               | <b>uITLLQ VEGTD GM-28</b>             | 2184.0 | <b>LvATG GuITLL QVEGT D</b>                 |
| 274.1               | <b>TDG</b>                                       | 670.3                      | <b>QVEGT DG-NH<sub>3</sub></b>                    | 1042.5               | <b>TGGuIT LLQ-H<sub>2</sub>O</b>                  | 1509.2 <sup>+2</sup> | <b>MH<sup>+2</sup></b>                | 2195.1 | <b>a<sub>17</sub>-NH<sub>3</sub></b>        |
| 274.2               | <b>MIG-28</b>                                    | 671.855<br>4 <sup>+2</sup> | <b>y<sub>13</sub>-H<sub>2</sub>O<sup>+2</sup></b> | 1042.6               | <b>ITLLQV EGTD-28</b>                             | 1514.7               | <b>TLvATG GuITL-28</b>                | 2212.1 | <b>a<sub>17</sub></b>                       |
| 274.2               | <b>GMI-28</b>                                    | 672.3                      | <b>VEGTD GM-H<sub>2</sub>O</b>                    | 1043.5               | <b>TGGuIT LLQ-NH<sub>3</sub></b>                  | 1514.7               | <b>LTLvAT GGuIT-28</b>                | 2213.1 | <b>LvATG GuITLL QVEGT DG-28</b>             |
| 276.1               | <b>DGM-28</b>                                    | 672.347<br>4 <sup>+2</sup> | <b>y<sub>13</sub>-NH<sub>3</sub><sup>+2</sup></b> | 1044.5               | <b>LLQVE GTDGM</b>                                | 1516.7               | <b>uITLLQ VEGTD GM-H<sub>2</sub>O</b> | 2222.1 | <b>b<sub>17</sub>-H<sub>2</sub>O</b>        |
| 286.1               | <b>DGM-H<sub>2</sub>O</b>                        | 676.3                      | <b>EGTDG MI-28</b>                                | 1044.5               | <b>LQVEG TDGMI</b>                                | 1517.7               | <b>uITLLQ VEGTD GM-NH<sub>3</sub></b> | 2223.0 | <b>LvATG GuITLL QVEGT DG-H<sub>2</sub>O</b> |
| 286.1               | <b>VEG</b>                                       | 676.3                      | <b>ATGGuIT</b>                                    | 1045.6               | <b>uITLLQ VE-28</b>                               | 1517.7               | <b>GGuITL LQVEG TDG</b>               | 2223.1 | <b>b<sub>17</sub>-NH<sub>3</sub></b>        |
| 287.1               | <b>ATGG</b>                                      | 678.3                      | <b>TGGuIT -28</b>                                 | 1052.5               | <b>LTLvAT GG</b>                                  | 1517.8               | <b>ATGGuITLLQVE GT</b>                | 2224.0 | <b>LvATG GuITLL QVEGT DG-NH<sub>3</sub></b> |
| 288.1               | <b>EGT</b>                                       | 680.860<br>7 <sup>+2</sup> | <b>y<sub>13</sub><sup>+2</sup></b>                | 1052.6               | <b>ITLLQV EGTD-H<sub>2</sub>O</b>                 | 1524.7               | <b>TLvATG GuITL-H<sub>2</sub>O</b>    | 2231.0 | <b>vATGG uITLLQ VEGTD GM-28</b>             |
| 300.2               | <b>y<sub>3</sub>-NH<sub>3</sub></b>              | 684.4                      | <b>TLLQVE</b>                                     | 1053.5               | <b>b<sub>7</sub></b>                              | 1524.7               | <b>LTLvAT GGuIT-H<sub>2</sub>O</b>    | 2240.1 | <b>b<sub>17</sub></b>                       |
| 300.2               | <b>ITL-28</b>                                    | 686.3                      | <b>EGTDG MI-H<sub>2</sub>O</b>                    | 1053.5               | <b>ITLLQV EGTD-NH<sub>3</sub></b>                 | 1526.8               | <b>LvATG GuITLL-28</b>                | 2241.0 | <b>vATGG uITLLQ VEGTD GM-H<sub>2</sub>O</b> |
| 300.2               | <b>TLL-28</b>                                    | 687.3                      | <b>QVEGT DG</b>                                   | 1055.6               | <b>uITLLQ VE-H<sub>2</sub>O</b>                   | 1528.7               | <b>a<sub>11</sub></b>                 | 2241.1 | <b>LvATG GuITLL QVEGT DG</b>                |
| 300.2               | <b>LTL-28</b>                                    | 688.3                      | <b>TGGuIT -H<sub>2</sub>O</b>                     | 1056.5               | <b>uITLLQ VE-NH<sub>3</sub></b>                   | 1533.8               | <b>TGGuIT LLQVE GTD-28</b>            | 2242.0 | <b>vATGG uITLLQ VEGTD GM-NH<sub>3</sub></b> |
| 301.7 <sup>+2</sup> | <b>y<sub>6</sub>-H<sub>2</sub>O<sup>+2</sup></b> | 689.4                      | <b>uITLL-28</b>                                   | 1058.6               | <b>GGuITL LQV</b>                                 | 1534.7               | <b>uITLLQ VEGTD GM</b>                | 2252.1 | <b>a<sub>18</sub>-NH<sub>3</sub></b>        |
| 302.1 <sup>+2</sup> | <b>y<sub>6</sub>-NH<sub>3</sub><sup>+2</sup></b> | 690.3                      | <b>VEGTD GM</b>                                   | 1060.0 <sup>+2</sup> | <b>y<sub>20</sub>-H<sub>2</sub>O<sup>+2</sup></b> | 1536.8               | <b>LvATG GuITLL-H<sub>2</sub>O</b>    | 2255.1 | <b>LTLvAT GGuITL LQVEG T-28</b>             |

|                     |                                     |       |                                     |                      |                                                   |        |                                                     |        |                                                          |
|---------------------|-------------------------------------|-------|-------------------------------------|----------------------|---------------------------------------------------|--------|-----------------------------------------------------|--------|----------------------------------------------------------|
| 302.2               | <b>GMI</b>                          | 690.4 | <b>GGuITL-28</b>                    | 1060.5 <sup>+2</sup> | <b>y<sub>20</sub>-NH<sub>3</sub><sup>+2</sup></b> | 1538.7 | <b>b<sub>11</sub>-H<sub>2</sub>O</b>                | 2257.1 | <b>TLvATG<br/>GuITLL<br/>QVEGT<br/>D-28</b>              |
| 302.2               | <b>MIG</b>                          | 696.3 | <b>TLvA-28</b>                      | 1060.6               | <b>TGGuITLLQ</b>                                  | 1541.7 | <b>vATGG<br/>uITLLQ-28</b>                          | 2259.0 | <b>vATGG<br/>uITLLQ<br/>VEGTD<br/>GM</b>                 |
| 302.2               | <b>a<sub>3</sub></b>                | 696.3 | <b>LvAT-28</b>                      | 1069.0 <sup>+2</sup> | <b>y<sub>20</sub><sup>+2</sup></b>                | 1542.7 | <b>TLvATG<br/>GuITL</b>                             | 2265.1 | <b>LTLvAT<br/>GGuITL<br/>LQVEG<br/>T-H<sub>2</sub>O</b>  |
| 303.1               | <b>GTDG-28</b>                      | 697.3 | <b>vATGG-28</b>                     | 1070.6               | <b>ITLLQV<br/>EGTD</b>                            | 1542.7 | <b>LTLvAT<br/>GGuIT</b>                             | 2266.1 | <b>LTLvAT<br/>GGuITL<br/>LQVEG<br/>T-NH<sub>3</sub></b>  |
| 304.1               | <b>DGM</b>                          | 699.4 | <b>uITLL-H<sub>2</sub>O</b>         | 1073.5               | <b>LQVEG<br/>TDGMI<br/>G-28</b>                   | 1543.7 | <b>TGGuIT<br/>LLQVE<br/>GTD-<br/>H<sub>2</sub>O</b> | 2267.1 | <b>TLvATG<br/>GuITLL<br/>QVEGT<br/>D-H<sub>2</sub>O</b>  |
| 306.1               | <b>Gu-28</b>                        | 700.4 | <b>GGuITL-H<sub>2</sub>O</b>        | 1073.6               | <b>uITLLQ<br/>VE</b>                              | 1544.7 | <b>TGGuIT<br/>LLQVE<br/>GTD-<br/>NH<sub>3</sub></b> | 2268.1 | <b>TLvATG<br/>GuITLL<br/>QVEGT<br/>D-NH<sub>3</sub></b>  |
| 310.2               | <b>TLL-H<sub>2</sub>O</b>           | 703.3 | <b>y<sub>7</sub>-H<sub>2</sub>O</b> | 1082.5               | <b>a<sub>8</sub></b>                              | 1551.7 | <b>vATGG<br/>uITLLQ-<br/>H<sub>2</sub>O</b>         | 2269.1 | <b>a<sub>18</sub></b>                                    |
| 310.2               | <b>ITL-H<sub>2</sub>O</b>           | 704.3 | <b>EGTDG<br/>MI</b>                 | 1083.5               | <b>LQVEG<br/>TDGMI<br/>G-H<sub>2</sub>O</b>       | 1552.7 | <b>vATGG<br/>uITLLQ-<br/>NH<sub>3</sub></b>         | 2279.1 | <b>b<sub>18</sub>-H<sub>2</sub>O</b>                     |
| 310.2               | <b>LTL-H<sub>2</sub>O</b>           | 704.3 | <b>y<sub>7</sub>-NH<sub>3</sub></b> | 1084.5               | <b>LQVEG<br/>TDGMI<br/>G-NH<sub>3</sub></b>       | 1554.8 | <b>LvATG<br/>GuITLL</b>                             | 2280.1 | <b>b<sub>18</sub>-NH<sub>3</sub></b>                     |
| 310.7 <sup>+2</sup> | <b>y<sub>6</sub><sup>+2</sup></b>   | 706.3 | <b>TLvA-<br/>H<sub>2</sub>O</b>     | 1086.5               | <b>vATGG<br/>ul-28</b>                            | 1556.7 | <b>b<sub>11</sub></b>                               | 2283.1 | <b>LTLvAT<br/>GGuITL<br/>LQVEG<br/>T</b>                 |
| 312.2               | <b>b<sub>3</sub>-H<sub>2</sub>O</b> | 706.3 | <b>LvAT-<br/>H<sub>2</sub>O</b>     | 1086.5               | <b>LvATG<br/>Gu-28</b>                            | 1556.8 | <b>y<sub>15</sub>-H<sub>2</sub>O</b>                | 2285.1 | <b>TLvATG<br/>GuITLL<br/>QVEGT<br/>D</b>                 |
| 313.1               | <b>GTDG-<br/>H<sub>2</sub>O</b>     | 706.3 | <b>TGGuIT</b>                       | 1092.5               | <b>b<sub>8</sub>-H<sub>2</sub>O</b>               | 1557.8 | <b>y<sub>15</sub>-NH<sub>3</sub></b>                | 2297.1 | <b>b<sub>18</sub></b>                                    |
| 313.2               | <b>LQV-28</b>                       | 707.3 | <b>vATGG-<br/>H<sub>2</sub>O</b>    | 1096.5               | <b>vATGG<br/>ul-H<sub>2</sub>O</b>                | 1561.8 | <b>TGGuIT<br/>LLQVE<br/>GTD</b>                     | 2314.1 | <b>TLvATG<br/>GuITLL<br/>QVEGT<br/>DG-28</b>             |
| 317.2               | <b>y<sub>3</sub></b>                | 713.4 | <b>TLLQVE<br/>G-28</b>              | 1096.5               | <b>LvATG<br/>Gu-H<sub>2</sub>O</b>                | 1563.8 | <b>GuITLL<br/>QVEGT<br/>DGM-28</b>                  | 2324.1 | <b>TLvATG<br/>GuITLL<br/>QVEGT<br/>DG-H<sub>2</sub>O</b> |
| 324.2               | <b>LQV-<br/>NH<sub>3</sub></b>      | 713.4 | <b>LLQVE<br/>GT-28</b>              | 1099.6               | <b>ITLLQV<br/>EGTDG-<br/>28</b>                   | 1569.7 | <b>vATGG<br/>uITLLQ</b>                             | 2325.1 | <b>TLvATG<br/>GuITLL<br/>QVEGT<br/>DG-NH<sub>3</sub></b> |



|                            |                                                  |                            |                                                   |        |                                    |        |                                        |        |                                              |
|----------------------------|--------------------------------------------------|----------------------------|---------------------------------------------------|--------|------------------------------------|--------|----------------------------------------|--------|----------------------------------------------|
| 327.2                      | <b>LLQ-28</b>                                    | 715.4                      | <b>LQVEG TD-28</b>                                | 1101.5 | <b>LQVEG TDGMI G</b>               | 1573.7 | <b>GuITLL QVEGT DGM-H<sub>2</sub>O</b> | 2342.1 | <b>TLvATG GuITLL QVEGT DG</b>                |
| 328.2                      | <b>ITL</b>                                       | 717.4                      | <b>uITLL</b>                                      | 1102.6 | <b>GuITLL QVE-28</b>               | 1574.7 | <b>GuITLL QVEGT DGM-NH<sub>3</sub></b> | 2344.1 | <b>vATGG uITLLQ VEGTD GMI-28</b>             |
| 328.2                      | <b>TLL</b>                                       | 718.4                      | <b>GGuITL</b>                                     | 1102.6 | <b>uITLLQ VEG-28</b>               | 1574.8 | <b>y<sub>15</sub></b>                  | 2344.1 | <b>LvATG GuITLL QVEGT DGM-28</b>             |
| 328.2                      | <b>LTL</b>                                       | 721.4                      | <b>y<sub>7</sub></b>                              | 1103.6 | <b>ATGGuITLLQ-28</b>               | 1590.8 | <b>TGGuITLLQVE GTDG-28</b>             | 2353.1 | <b>a<sub>19</sub>-NH<sub>3</sub></b>         |
| 329.2                      | <b>QVE-28</b>                                    | 722.379<br>2 <sup>+2</sup> | <b>y<sub>14</sub>-H<sub>2</sub>O<sup>+2</sup></b> | 1109.6 | <b>ITLLQV EGTDG-H<sub>2</sub>O</b> | 1591.8 | <b>GuITLL QVEGT DGM</b>                | 2354.1 | <b>vATGG uITLLQ VEGTD GMI-H<sub>2</sub>O</b> |
| 330.2                      | <b>b<sub>3</sub></b>                             | 722.871<br>2 <sup>+2</sup> | <b>y<sub>14</sub>-NH<sub>3</sub><sup>+2</sup></b> | 1110.5 | <b>b<sub>8</sub></b>               | 1600.8 | <b>TGGuITLLQVE GTDG-H<sub>2</sub>O</b> | 2354.1 | <b>LvATG GuITLL QVEGT DGM-H<sub>2</sub>O</b> |
| 331.1                      | <b>GTDG</b>                                      | 723.4                      | <b>LLQVE GT-H<sub>2</sub>O</b>                    | 1110.6 | <b>ITLLQV EGTDG-NH<sub>3</sub></b> | 1601.8 | <b>TGGuITLLQVE GTDG-NH<sub>3</sub></b> | 2355.1 | <b>vATGG uITLLQ VEGTD GMI-NH<sub>3</sub></b> |
| 331.2                      | <b>GMIG-28</b>                                   | 723.4                      | <b>TLLQVE G-H<sub>2</sub>O</b>                    | 1112.6 | <b>GuITLL QVE-H<sub>2</sub>O</b>   | 1604.8 | <b>ATGGuITLLQVE GTD-28</b>             | 2355.1 | <b>LvATG GuITLL QVEGT DGM-NH<sub>3</sub></b> |
| 334.1                      | <b>Gu</b>                                        | 724.3                      | <b>TLvA</b>                                       | 1112.6 | <b>uITLLQ VEG-H<sub>2</sub>O</b>   | 1614.8 | <b>ATGGuITLLQVE GTD-H<sub>2</sub>O</b> | 2370.2 | <b>a<sub>19</sub></b>                        |
| 338.2                      | <b>LLQ-NH<sub>3</sub></b>                        | 724.3                      | <b>LvAT</b>                                       | 1113.6 | <b>GuITLL QVE-NH<sub>3</sub></b>   | 1615.8 | <b>ATGGuITLLQVE GTD-NH<sub>3</sub></b> | 2370.2 | <b>LTLvATGGuITLLQVEG TD-28</b>               |
| 339.2                      | <b>QVE-H<sub>2</sub>O</b>                        | 724.4                      | <b>TLLQVE G-NH<sub>3</sub></b>                    | 1113.6 | <b>uITLLQ VEG-NH<sub>3</sub></b>   | 1618.8 | <b>TGGuITLLQVE GTDG</b>                | 2372.1 | <b>vATGG uITLLQ VEGTD GMI</b>                |
| 340.2                      | <b>QVE-NH<sub>3</sub></b>                        | 724.4                      | <b>LLQVE GT-NH<sub>3</sub></b>                    | 1113.6 | <b>ATGGuITLLQ-H<sub>2</sub>O</b>   | 1619.8 | <b>uITLLQ VEGTD GMI-28</b>             | 2372.1 | <b>LvATG GuITLL QVEGT DGM</b>                |
| 341.2                      | <b>LQV</b>                                       | 725.3                      | <b>vATGG</b>                                      | 1114.5 | <b>vATGG uI</b>                    | 1620.8 | <b>GGuITLLQVEG TDGM-28</b>             | 2380.2 | <b>b<sub>19</sub>-H<sub>2</sub>O</b>         |
| 352.175<br>8 <sup>+2</sup> | <b>y<sub>7</sub>-H<sub>2</sub>O<sup>+2</sup></b> | 725.3                      | <b>LQVEG TD-H<sub>2</sub>O</b>                    | 1114.5 | <b>LvATG Gu</b>                    | 1627.8 | <b>TLvATG GuITLL-28</b>                | 2380.2 | <b>LTLvATGGuITLLQVEG TD-H<sub>2</sub>O</b>   |

|                     |                                                  |                            |                                          |        |                                             |        |                                                      |        |                                                                |
|---------------------|--------------------------------------------------|----------------------------|------------------------------------------|--------|---------------------------------------------|--------|------------------------------------------------------|--------|----------------------------------------------------------------|
| 352.7 <sup>+2</sup> | <b>y<sub>7</sub>-NH<sub>3</sub><sup>+2</sup></b> | 726.3                      | <b>LQVEG<br/>TD-NH<sub>3</sub></b>       | 1114.6 | <b>ATGGul<br/>TLLQ-<br/>NH<sub>3</sub></b>  | 1627.8 | <b>LTLvAT<br/>GGuITL<br/>-28</b>                     | 2381.1 | <b>b<sub>19</sub>-NH<sub>3</sub></b>                           |
| 355.2               | <b>LLQ</b>                                       | 731.384<br>5 <sup>+2</sup> | <b>y<sub>14</sub><sup>+2</sup></b>       | 1116.5 | <b>y<sub>11</sub>-H<sub>2</sub>O</b>        | 1629.8 | <b>a<sub>12</sub></b>                                | 2381.1 | <b>LTLvAT<br/>GGuITL<br/>LQVEG<br/>TD-NH<sub>3</sub></b>       |
| 357.2               | <b>QVE</b>                                       | 733.3                      | <b>EGTDG<br/>MIG-28</b>                  | 1117.5 | <b>y<sub>11</sub>-NH<sub>3</sub></b>        | 1629.8 | <b>uITLLQ<br/>VEGTD<br/>GMI-<br/>H<sub>2</sub>O</b>  | 2398.2 | <b>b<sub>19</sub></b>                                          |
| 359.2               | <b>GMIG</b>                                      | 738.4                      | <b>LTLv-28</b>                           | 1117.6 | <b>TLLQVE<br/>GTDGM<br/>-28</b>             | 1630.8 | <b>GGuITL<br/>LQVEG<br/>TDGM-<br/>H<sub>2</sub>O</b> | 2398.2 | <b>LTLvAT<br/>GGuITL<br/>LQVEG<br/>TD</b>                      |
| 359.2               | <b>VEGT-<br/>28</b>                              | 741.4                      | <b>LLQVE<br/>GT</b>                      | 1127.5 | <b>TLLQVE<br/>GTDGM<br/>-H<sub>2</sub>O</b> | 1630.8 | <b>uITLLQ<br/>VEGTD<br/>GMI-<br/>NH<sub>3</sub></b>  | 2401.1 | <b>vATGG<br/>uITLLQ<br/>VEGTD<br/>GMIG-<br/>28</b>             |
| 361.2 <sup>+2</sup> | <b>y<sub>7</sub><sup>+2</sup></b>                | 741.4                      | <b>TLLQVE<br/>G</b>                      | 1127.6 | <b>ITLLQV<br/>EGTDG</b>                     | 1631.7 | <b>GGuITL<br/>LQVEG<br/>TDGM-<br/>NH<sub>3</sub></b> | 2411.1 | <b>vATGG<br/>uITLLQ<br/>VEGTD<br/>GMIG-<br/>H<sub>2</sub>O</b> |
| 362.2               | <b>ul-28</b>                                     | 743.3                      | <b>EGTDG<br/>MIG-<br/>H<sub>2</sub>O</b> | 1128.5 | <b>TLLQVE<br/>GTDGM<br/>-NH<sub>3</sub></b> | 1632.8 | <b>ATGGul<br/>TLLQVE<br/>GTD</b>                     | 2412.1 | <b>vATGG<br/>uITLLQ<br/>VEGTD<br/>GMIG-<br/>NH<sub>3</sub></b> |
| 363.2               | <b>GGu-28</b>                                    | 743.4                      | <b>LQVEG<br/>TD</b>                      | 1129.6 | <b>LLQVE<br/>GTDGM<br/>I-28</b>             | 1637.8 | <b>TLvATG<br/>GuITLL-<br/>H<sub>2</sub>O</b>         | 2427.2 | <b>LTLvAT<br/>GGuITL<br/>LQVEG<br/>TDG-28</b>                  |
| 369.2               | <b>VEGT-<br/>H<sub>2</sub>O</b>                  | 746.4                      | <b>GuITLL-<br/>28</b>                    | 1130.6 | <b>GuITLL<br/>QVE</b>                       | 1637.8 | <b>LTLvAT<br/>GGuITL<br/>-H<sub>2</sub>O</b>         | 2429.1 | <b>vATGG<br/>uITLLQ<br/>VEGTD<br/>GMIG</b>                     |
| 375.2               | <b>EGTD-<br/>28</b>                              | 748.4                      | <b>LTLv-<br/>H<sub>2</sub>O</b>          | 1130.6 | <b>uITLLQ<br/>VEG</b>                       | 1639.7 | <b>b<sub>12</sub>-H<sub>2</sub>O</b>                 | 2437.2 | <b>LTLvAT<br/>GGuITL<br/>LQVEG<br/>TDG-<br/>H<sub>2</sub>O</b> |
| 377.1               | <b>TDGM-<br/>28</b>                              | 749.4                      | <b>ATGGul<br/>T-28</b>                   | 1131.6 | <b>ATGGul<br/>TLLQ</b>                      | 1640.8 | <b>vATGG<br/>uITLLQ<br/>V-28</b>                     | 2438.2 | <b>LTLvAT<br/>GGuITL<br/>LQVEG<br/>TDG-<br/>NH<sub>3</sub></b> |
| 380.7 <sup>+2</sup> | <b>y<sub>8</sub>-H<sub>2</sub>O<sup>+2</sup></b> | 753.4                      | <b>LvATG-<br/>28</b>                     | 1131.6 | <b>TGGuIT<br/>LLQV-<br/>28</b>              | 1647.8 | <b>uITLLQ<br/>VEGTD<br/>GMI</b>                      | 2445.1 | <b>TLvATG<br/>GuITLL<br/>QVEGT<br/>DGM-28</b>                  |
| 381.2 <sup>+2</sup> | <b>y<sub>8</sub>-NH<sub>3</sub><sup>+2</sup></b> | 756.4                      | <b>GuITLL-<br/>H<sub>2</sub>O</b>        | 1134.5 | <b>y<sub>11</sub></b>                       | 1648.8 | <b>GGuITL<br/>LQVEG<br/>TDGM</b>                     | 2455.1 | <b>TLvATG<br/>GuITLL<br/>QVEGT<br/>DGM-<br/>H<sub>2</sub>O</b> |

|                     |                                   |                            |                                                               |        |                                     |        |                                          |        |                                                |
|---------------------|-----------------------------------|----------------------------|---------------------------------------------------------------|--------|-------------------------------------|--------|------------------------------------------|--------|------------------------------------------------|
| 385.1               | <b>EGTD-H<sub>2</sub>O</b>        | 759.4                      | <b>ATGGul T-H<sub>2</sub>O</b>                                | 1139.5 | <b>a<sub>9</sub></b>                | 1650.8 | <b>vATGG ulTLLQ V-H<sub>2</sub>O</b>     | 2455.2 | <b>LTLvAT GGuITL LQVEG TDG</b>                 |
| 386.2               | <b>QVEG-28</b>                    | 760.4                      | <b>y<sub>8</sub>-H<sub>2</sub>O</b>                           | 1139.6 | <b>LLQVE GTDGM I-H<sub>2</sub>O</b> | 1651.8 | <b>vATGG ulTLLQ V-NH<sub>3</sub></b>     | 2456.1 | <b>TLvATG GuITLL QVEGT DGM-NH<sub>3</sub></b>  |
| 387.1               | <b>TDGM-H<sub>2</sub>O</b>        | 761.3                      | <b>EGTDG MIG</b>                                              | 1140.6 | <b>LLQVE GTDGM I-NH<sub>3</sub></b> | 1654.8 | <b>LvATG GuITLL Q-28</b>                 | 2457.2 | <b>LvATG GuITLL QVEGT DGMI-28</b>              |
| 387.2               | <b>VEGT</b>                       | 761.3                      | <b>y<sub>8</sub>-NH<sub>3</sub></b>                           | 1141.6 | <b>TGGulT LLQV-H<sub>2</sub>O</b>   | 1655.8 | <b>TLvATG GuITLL</b>                     | 2467.2 | <b>LvATG GuITLL QVEGT DGMI-H<sub>2</sub>O</b>  |
| 389.2               | <b>DGMI-28</b>                    | 763.3                      | <b>LvATG-H<sub>2</sub>O</b>                                   | 1142.6 | <b>TGGulT LLQV-NH<sub>3</sub></b>   | 1655.8 | <b>LTLvAT GGuITL</b>                     | 2468.1 | <b>LvATG GuITLL QVEGT DGMI-NH<sub>3</sub></b>  |
| 389.7 <sup>+2</sup> | <b>y<sub>8</sub><sup>+2</sup></b> | 766.4                      | <b>LTLv</b>                                                   | 1145.6 | <b>TLLQVE GTDGM</b>                 | 1657.8 | <b>b<sub>12</sub></b>                    | 2468.2 | <b>a<sub>20</sub>-NH<sub>3</sub></b>           |
| 390.2               | <b>ul</b>                         | 769.5                      | <b>ITLLQV E-28</b>                                            | 1149.5 | <b>b<sub>9</sub>-H<sub>2</sub>O</b> | 1661.8 | <b>ATGGul TLLQVE GTDG-28</b>             | 2473.1 | <b>TLvATG GuITLL QVEGT DGM</b>                 |
| 391.1               | <b>GGu</b>                        | 772.4                      | <b>LQVEG TDG-28</b>                                           | 1157.6 | <b>LLQVE GTDGM I</b>                | 1664.8 | <b>LvATG GuITLL Q-H<sub>2</sub>O</b>     | 2485.2 | <b>LvATG GuITLL QVEGT DGMI</b>                 |
| 396.2               | <b>QVEG-H<sub>2</sub>O</b>        | 774.4                      | <b>GuITLL</b>                                                 | 1159.6 | <b>TGGulT LLQV</b>                  | 1665.8 | <b>LvATG GuITLL Q-NH<sub>3</sub></b>     | 2485.2 | <b>a<sub>20</sub></b>                          |
| 397.2               | <b>QVEG-NH<sub>3</sub></b>        | 775.4                      | <b>VEGTD GMI-28</b>                                           | 1159.6 | <b>GGuITL LQVE-28</b>               | 1668.8 | <b>vATGG ulTLLQ V</b>                    | 2495.2 | <b>b<sub>20</sub>-H<sub>2</sub>O</b>           |
| 399.2               | <b>DGMI-H<sub>2</sub>O</b>        | 777.4                      | <b>ATGGul T</b>                                               | 1159.6 | <b>GuITLL QVEG-28</b>               | 1671.8 | <b>ATGGul TLLQVE GTDG-H<sub>2</sub>O</b> | 2496.2 | <b>b<sub>20</sub>-NH<sub>3</sub></b>           |
| 403.1               | <b>EGTD</b>                       | 778.4                      | <b>y<sub>8</sub></b>                                          | 1167.5 | <b>b<sub>9</sub></b>                | 1672.8 | <b>ATGGul TLLQVE GTDG-NH<sub>3</sub></b> | 2513.2 | <b>b<sub>20</sub></b>                          |
| 405.1               | <b>TDGM</b>                       | 778.921<br>3 <sup>+2</sup> | <b>y<sub>15</sub><sup>-</sup> H<sub>2</sub>O<sup>+2</sup></b> | 1169.6 | <b>GGuITL LQVE-H<sub>2</sub>O</b>   | 1676.8 | <b>GuITLL QVEGT DGMI-28</b>              | 2514.2 | <b>LvATG GuITLL QVEGT DGMIG-28</b>             |
| 413.3               | <b>ITLL-28</b>                    | 779.413<br>3 <sup>+2</sup> | <b>y<sub>15</sub><sup>-</sup> NH<sub>3</sub><sup>+2</sup></b> | 1169.6 | <b>GuITLL QVEG-H<sub>2</sub>O</b>   | 1676.8 | <b>ulTLLQ VEGTD GMIG-28</b>              | 2524.2 | <b>LvATG GuITLL QVEGT DGMIG-H<sub>2</sub>O</b> |

|       |                                     |                            |                                          |        |                                              |        |                                                       |        |                                                                  |
|-------|-------------------------------------|----------------------------|------------------------------------------|--------|----------------------------------------------|--------|-------------------------------------------------------|--------|------------------------------------------------------------------|
| 414.2 | <b>QVEG</b>                         | 779.5                      | <b>ITLLQV<br/>E-H<sub>2</sub>O</b>       | 1170.6 | <b>GGuITL<br/>LQVE-<br/>NH<sub>3</sub></b>   | 1682.8 | <b>LvATG<br/>GuITLL<br/>Q</b>                         | 2525.2 | <b>LvATG<br/>GuITLL<br/>QVEGT<br/>DGMIG-<br/>NH<sub>3</sub></b>  |
| 415.3 | <b>a<sub>4</sub></b>                | 780.5                      | <b>ITLLQV<br/>E-NH<sub>3</sub></b>       | 1170.6 | <b>GuITLL<br/>QVEG-<br/>NH<sub>3</sub></b>   | 1686.8 | <b>GuITLL<br/>QVEGT<br/>DGMIG-<br/>H<sub>2</sub>O</b> | 2525.2 | <b>a<sub>21</sub>-NH<sub>3</sub></b>                             |
| 417.2 | <b>DGMI</b>                         | 781.3                      | <b>LvATG</b>                             | 1186.6 | <b>LLQVE<br/>GTDGM<br/>IG-28</b>             | 1686.8 | <b>uITLLQ<br/>VEGTD<br/>GMIG-<br/>H<sub>2</sub>O</b>  | 2542.2 | <b>LvATG<br/>GuITLL<br/>QVEGT<br/>DGMIG</b>                      |
| 419.2 | <b>Gul-28</b>                       | 782.4                      | <b>LQVEG<br/>TDG-<br/>H<sub>2</sub>O</b> | 1187.5 | <b>vATGG<br/>uIT-28</b>                      | 1687.8 | <b>GuITLL<br/>QVEGT<br/>DGMIG-<br/>NH<sub>3</sub></b> | 2542.2 | <b>a<sub>21</sub></b>                                            |
| 423.3 | <b>ITLL-<br/>H<sub>2</sub>O</b>     | 783.4                      | <b>LQVEG<br/>TDG-<br/>NH<sub>3</sub></b> | 1187.5 | <b>TLvATG<br/>Gu-28</b>                      | 1687.8 | <b>uITLLQ<br/>VEGTD<br/>GMIG-<br/>NH<sub>3</sub></b>  | 2552.2 | <b>b<sub>21</sub>-H<sub>2</sub>O</b>                             |
| 425.2 | <b>b<sub>4</sub>-H<sub>2</sub>O</b> | 785.3                      | <b>VEGTD<br/>GMI-<br/>H<sub>2</sub>O</b> | 1187.6 | <b>GGuITL<br/>LQVE</b>                       | 1689.8 | <b>ATGGul<br/>TLLQVE<br/>GTDG</b>                     | 2553.2 | <b>b<sub>21</sub>-NH<sub>3</sub></b>                             |
| 426.3 | <b>LLQV-<br/>28</b>                 | 787.926<br>5 <sup>+2</sup> | <b>y<sub>15</sub><sup>+2</sup></b>       | 1187.6 | <b>GuITLL<br/>QVEG</b>                       | 1704.8 | <b>GuITLL<br/>QVEGT<br/>DGMIG</b>                     | 2557.2 | <b>y<sub>21</sub>-H<sub>2</sub>O</b>                             |
| 428.3 | <b>TLLQ-<br/>28</b>                 | 790.3                      | <b>QVEGT<br/>DGM-28</b>                  | 1196.6 | <b>LLQVE<br/>GTDGM<br/>IG-H<sub>2</sub>O</b> | 1704.8 | <b>uITLLQ<br/>VEGTD<br/>GMIG</b>                      | 2558.2 | <b>y<sub>21</sub>-NH<sub>3</sub></b>                             |
| 431.2 | <b>y<sub>4</sub>-NH<sub>3</sub></b> | 791.4                      | <b>TGGuIT<br/>L-28</b>                   | 1197.5 | <b>vATGG<br/>uIT-H<sub>2</sub>O</b>          | 1721.8 | <b>TGGuIT<br/>LLQVE<br/>GTDGM<br/>-28</b>             | 2558.2 | <b>LTLvAT<br/>GGuITL<br/>LQVEG<br/>TDGM-<br/>28</b>              |
| 432.2 | <b>EGTDG-<br/>28</b>                | 797.4                      | <b>TLvAT-<br/>28</b>                     | 1197.5 | <b>TLvATG<br/>Gu-H<sub>2</sub>O</b>          | 1731.8 | <b>TGGuIT<br/>LLQVE<br/>GTDGM<br/>-H<sub>2</sub>O</b> | 2558.2 | <b>TLvATG<br/>GuITLL<br/>QVEGT<br/>DGMIG-<br/>28</b>             |
| 434.2 | <b>GTDGM<br/>-28</b>                | 797.5                      | <b>ITLLQV<br/>E</b>                      | 1197.6 | <b>LLQVE<br/>GTDGM<br/>IG-NH<sub>3</sub></b> | 1732.8 | <b>TGGuIT<br/>LLQVE<br/>GTDGM<br/>-NH<sub>3</sub></b> | 2568.2 | <b>TLvATG<br/>GuITLL<br/>QVEGT<br/>DGMIG-<br/>H<sub>2</sub>O</b> |
| 437.3 | <b>LLQV-<br/>NH<sub>3</sub></b>     | 800.3                      | <b>QVEGT<br/>DGM-<br/>H<sub>2</sub>O</b> | 1199.6 | <b>LvATG<br/>Gul-28</b>                      | 1733.9 | <b>GGuITL<br/>LQVEG<br/>TDGMIG-<br/>28</b>            | 2568.2 | <b>LTLvAT<br/>GGuITL<br/>LQVEG<br/>TDGM-<br/>H<sub>2</sub>O</b>  |
| 438.3 | <b>TLLQ-<br/>H<sub>2</sub>O</b>     | 800.4                      | <b>LQVEG<br/>TDG</b>                     | 1202.7 | <b>ATGGul<br/>TLLQV-<br/>28</b>              | 1733.9 | <b>GuITLL<br/>QVEGT<br/>DGMIG-<br/>28</b>             | 2569.2 | <b>LTLvAT<br/>GGuITL<br/>LQVEG<br/>TDGM-<br/>NH<sub>3</sub></b>  |
| 439.3 | <b>TLLQ-<br/>NH<sub>3</sub></b>     | 801.3                      | <b>QVEGT<br/>DGM-<br/>NH<sub>3</sub></b> | 1203.6 | <b>uITLLQ<br/>VEGT-<br/>28</b>               | 1740.9 | <b>LTLvAT<br/>GGuITL<br/>L-28</b>                     | 2569.2 | <b>TLvATG<br/>GuITLL<br/>QVEGT<br/>DGMIG-<br/>NH<sub>3</sub></b> |

|                     |                                                  |       |                                     |        |                                             |        |                                                       |        |                                                                  |
|---------------------|--------------------------------------------------|-------|-------------------------------------|--------|---------------------------------------------|--------|-------------------------------------------------------|--------|------------------------------------------------------------------|
| 441.3               | <b>ITLL</b>                                      | 801.4 | <b>TGGuIT<br/>L-H<sub>2</sub>O</b>  | 1209.5 | <b>LvATG<br/>GuI-H<sub>2</sub>O</b>         | 1742.8 | <b>a<sub>13</sub></b>                                 | 2570.2 | <b>b<sub>21</sub></b>                                            |
| 442.2               | <b>EGTDG-<br/>H<sub>2</sub>O</b>                 | 803.4 | <b>VEGTD<br/>GMI</b>                | 1212.6 | <b>ATGGuI<br/>TLLQV-<br/>H<sub>2</sub>O</b> | 1743.8 | <b>GGuITL<br/>LQVEG<br/>TDGMI-<br/>H<sub>2</sub>O</b> | 2575.2 | <b>y<sub>21</sub></b>                                            |
| 442.3               | <b>LQVE-<br/>28</b>                              | 803.5 | <b>GGuITL<br/>L-28</b>              | 1213.6 | <b>ATGGuI<br/>TLLQV-<br/>NH<sub>3</sub></b> | 1743.8 | <b>GuITLL<br/>QVEGT<br/>DGMIG-<br/>H<sub>2</sub>O</b> | 2586.2 | <b>TLvATG<br/>GuITLL<br/>QVEGT<br/>DGMIG</b>                     |
| 443.3               | <b>b<sub>4</sub></b>                             | 807.4 | <b>TLvAT-<br/>H<sub>2</sub>O</b>    | 1213.6 | <b>uITLLQ<br/>VEGT-<br/>H<sub>2</sub>O</b>  | 1744.8 | <b>GGuITL<br/>LQVEG<br/>TDGMI-<br/>NH<sub>3</sub></b> | 2586.2 | <b>LTLvAT<br/>GGuITL<br/>LQVEG<br/>TDGM</b>                      |
| 444.2               | <b>GTDGM<br/>-H<sub>2</sub>O</b>                 | 809.4 | <b>LTLvA-<br/>28</b>                | 1214.6 | <b>LLQVE<br/>GTDGM<br/>IG</b>               | 1744.8 | <b>GuITLL<br/>QVEGT<br/>DGMIG-<br/>NH<sub>3</sub></b> | 2615.2 | <b>TLvATG<br/>GuITLL<br/>QVEGT<br/>DGMIG-<br/>28</b>             |
| 445.2 <sup>+2</sup> | <b>y<sub>9</sub>-H<sub>2</sub>O<sup>+2</sup></b> | 810.4 | <b>LvATG<br/>G-28</b>               | 1214.6 | <b>uITLLQ<br/>VEGT-<br/>NH<sub>3</sub></b>  | 1749.8 | <b>TGGuIT<br/>LLQVE<br/>GTDGM</b>                     | 2625.2 | <b>TLvATG<br/>GuITLL<br/>QVEGT<br/>DGMIG-<br/>H<sub>2</sub>O</b> |
| 445.7 <sup>+2</sup> | <b>y<sub>9</sub>-NH<sub>3</sub><sup>+2</sup></b> | 813.4 | <b>GGuITL<br/>L-H<sub>2</sub>O</b>  | 1215.5 | <b>vATGG<br/>uIT</b>                        | 1750.9 | <b>LTLvAT<br/>GGuITL<br/>L-H<sub>2</sub>O</b>         | 2626.2 | <b>TLvATG<br/>GuITLL<br/>QVEGT<br/>DGMIG-<br/>NH<sub>3</sub></b> |
| 446.2               | <b>DGMIG-<br/>28</b>                             | 814.5 | <b>TLLQVE<br/>GT-28</b>             | 1215.5 | <b>TLvATG<br/>Gu</b>                        | 1752.8 | <b>b<sub>13</sub>-H<sub>2</sub>O</b>                  | 2643.2 | <b>TLvATG<br/>GuITLL<br/>QVEGT<br/>DGMIG</b>                     |
| 447.2               | <b>GuI</b>                                       | 817.5 | <b>uITLLQ-<br/>28</b>               | 1216.6 | <b>GGuITL<br/>LQVEG-<br/>28</b>             | 1753.9 | <b>LvATG<br/>GuITLL<br/>QV-28</b>                     | 2656.2 | <b>a<sub>22</sub>-NH<sub>3</sub></b>                             |
| 448.3               | <b>y<sub>4</sub></b>                             | 818.3 | <b>QVEGT<br/>DGM</b>                | 1226.6 | <b>GGuITL<br/>LQVEG-<br/>H<sub>2</sub>O</b> | 1755.9 | <b>TLvATG<br/>GuITLL<br/>Q-28</b>                     | 2670.3 | <b>y<sub>22</sub>-H<sub>2</sub>O</b>                             |
| 452.3               | <b>LQVE-<br/>H<sub>2</sub>O</b>                  | 819.4 | <b>LTLvA-<br/>H<sub>2</sub>O</b>    | 1227.5 | <b>LvATG<br/>GuI</b>                        | 1761.9 | <b>GGuITL<br/>LQVEG<br/>TDGMI</b>                     | 2671.3 | <b>y<sub>22</sub>-NH<sub>3</sub></b>                             |
| 453.2               | <b>LQVE-<br/>NH<sub>3</sub></b>                  | 819.4 | <b>TGGuIT<br/>L</b>                 | 1227.6 | <b>GGuITL<br/>LQVEG-<br/>NH<sub>3</sub></b> | 1761.9 | <b>GuITLL<br/>QVEGT<br/>DGMIG</b>                     | 2671.3 | <b>LTLvAT<br/>GGuITL<br/>LQVEG<br/>TDGMI-<br/>28</b>             |
| 454.2 <sup>+2</sup> | <b>y<sub>9</sub><sup>+2</sup></b>                | 820.4 | <b>LvATG<br/>G-H<sub>2</sub>O</b>   | 1229.6 | <b>y<sub>12</sub>-H<sub>2</sub>O</b>        | 1763.9 | <b>LvATG<br/>GuITLL<br/>QV-H<sub>2</sub>O</b>         | 2673.3 | <b>a<sub>22</sub></b>                                            |
| 454.3               | <b>LLQV</b>                                      | 824.5 | <b>TLLQVE<br/>GT-H<sub>2</sub>O</b> | 1230.6 | <b>y<sub>12</sub>-NH<sub>3</sub></b>        | 1764.9 | <b>LvATG<br/>GuITLL<br/>QV-NH<sub>3</sub></b>         | 2681.3 | <b>LTLvAT<br/>GGuITL<br/>LQVEG<br/>TDGMI-<br/>H<sub>2</sub>O</b> |

|       |                            |       |                                   |        |                                       |        |                                                |        |                                                          |
|-------|----------------------------|-------|-----------------------------------|--------|---------------------------------------|--------|------------------------------------------------|--------|----------------------------------------------------------|
| 456.2 | DGMIG-H <sub>2</sub> O     | 825.4 | TLvAT                             | 1230.6 | TLLQVE<br>GTDGM<br>I-28               | 1765.9 | TLvATG<br>GuITLL<br>Q-H <sub>2</sub> O         | 2682.3 | LTLvAT<br>GGuITL<br>LQVEG<br>TDGMI-<br>NH <sub>3</sub>   |
| 456.3 | TLLQ                       | 825.4 | TLLQVE<br>GT-NH <sub>3</sub>      | 1230.6 | ITLLQV<br>EGTDG<br>M-28               | 1766.8 | TLvATG<br>GuITLL<br>Q-NH <sub>3</sub>          | 2683.2 | b <sub>22</sub> -H <sub>2</sub> O                        |
| 460.2 | EGTDG                      | 826.5 | ITLLQV<br>EG-28                   | 1230.7 | ATGGuI<br>TLLQV                       | 1768.9 | LTLvAT<br>GGuITL<br>L                          | 2684.2 | b <sub>22</sub> -NH <sub>3</sub>                         |
| 462.2 | GTDGM                      | 827.5 | uITLLQ-<br>H <sub>2</sub> O       | 1231.6 | uITLLQ<br>VEGT                        | 1769.9 | vATGG<br>uITLLQ<br>VE-28                       | 2688.3 | y <sub>22</sub>                                          |
| 463.2 | uIT-28                     | 828.4 | uITLLQ-<br>NH <sub>3</sub>        | 1240.6 | ITLLQV<br>EGTDG<br>M-H <sub>2</sub> O | 1770.8 | b <sub>13</sub>                                | 2699.3 | LTLvAT<br>GGuITL<br>LQVEG<br>TDGMI                       |
| 464.2 | TGGu-<br>28                | 828.4 | LLQVE<br>GTD-28                   | 1240.6 | TLLQVE<br>GTDGM<br>I-H <sub>2</sub> O | 1779.8 | vATGG<br>uITLLQ<br>VE-H <sub>2</sub> O         | 2701.2 | b <sub>22</sub>                                          |
| 470.3 | LQVE                       | 831.4 | GGuITL<br>L                       | 1241.6 | TLLQVE<br>GTDGM<br>I-NH <sub>3</sub>  | 1780.8 | vATGG<br>uITLLQ<br>VE-NH <sub>3</sub>          | 2728.3 | LTLvAT<br>GGuITL<br>LQVEG<br>TDGMI<br>G-28               |
| 473.2 | uIT-H <sub>2</sub> O       | 832.4 | VEGTD<br>GMIG-<br>28              | 1241.6 | ITLLQV<br>EGTDG<br>M-NH <sub>3</sub>  | 1781.9 | LvATG<br>GuITLL<br>QV                          | 2738.3 | LTLvAT<br>GGuITL<br>LQVEG<br>TDGMI<br>G-H <sub>2</sub> O |
| 474.2 | TGGu-<br>H <sub>2</sub> O  | 836.5 | ITLLQV<br>EG-H <sub>2</sub> O     | 1244.6 | GGuITL<br>LQVEG                       | 1783.9 | TLvATG<br>GuITLL<br>Q                          | 2739.3 | LTLvAT<br>GGuITL<br>LQVEG<br>TDGMI<br>G-NH <sub>3</sub>  |
| 474.2 | DGMIG                      | 837.4 | LTLvA                             | 1247.6 | y <sub>12</sub>                       | 1790.9 | GGuITL<br>LQVEG<br>TDGMI<br>G-28               | 2756.3 | LTLvAT<br>GGuITL<br>LQVEG<br>TDGMI<br>G                  |
| 474.2 | VEGTD-<br>28               | 837.5 | ITLLQV<br>EG-NH <sub>3</sub>      | 1258.6 | TLLQVE<br>GTDGM<br>I                  | 1792.9 | ATGGuI<br>TLLQVE<br>GTDGM<br>-28               | 2769.3 | a <sub>23</sub> -NH <sub>3</sub>                         |
| 476.2 | GGuI-28                    | 838.4 | LvATG<br>G                        | 1258.6 | ITLLQV<br>EGTDG<br>M                  | 1797.8 | vATGG<br>uITLLQ<br>VE                          | 2771.3 | y <sub>23</sub> -H <sub>2</sub> O                        |
| 482.2 | vA-28                      | 838.4 | LLQVE<br>GTD-<br>H <sub>2</sub> O | 1260.7 | TGGuIT<br>LLQVE-<br>28                | 1800.9 | GGuITL<br>LQVEG<br>TDGMI<br>G-H <sub>2</sub> O | 2772.3 | y <sub>23</sub> -NH <sub>3</sub>                         |
| 484.2 | VEGTD-<br>H <sub>2</sub> O | 839.4 | LLQVE<br>GTD-<br>NH <sub>3</sub>  | 1260.7 | GuITLL<br>QVEGT-<br>28                | 1801.9 | GGuITL<br>LQVEG<br>TDGMI<br>G-NH <sub>3</sub>  | 2786.3 | a <sub>23</sub>                                          |

|                     |                                                               |       |                                     |                      |                                                               |        |                                            |        |                                      |
|---------------------|---------------------------------------------------------------|-------|-------------------------------------|----------------------|---------------------------------------------------------------|--------|--------------------------------------------|--------|--------------------------------------|
| 487.3               | <b>QVEGT-28</b>                                               | 842.4 | <b>VEGTD GMIG-H<sub>2</sub>O</b>    | 1270.7               | <b>TGGuIT LLQVE-H<sub>2</sub>O</b>                            | 1802.8 | <b>ATGGuIT LLQVE GTDGM-H<sub>2</sub>O</b>  | 2789.3 | <b>y<sub>23</sub></b>                |
| 488.3               | <b>y<sub>5</sub>-NH<sub>3</sub></b>                           | 842.5 | <b>TLLQVE GT</b>                    | 1270.7               | <b>GuITLL QVEGT-H<sub>2</sub>O</b>                            | 1803.8 | <b>ATGGuIT LLQVE GTDGM-NH<sub>3</sub></b>  | 2796.3 | <b>b<sub>23</sub>-H<sub>2</sub>O</b> |
| 490.2               | <b>TDGMI-28</b>                                               | 845.5 | <b>uITLLQ</b>                       | 1271.6               | <b>TGGuIT LLQVE-NH<sub>3</sub></b>                            | 1818.9 | <b>GGuITL LQVEG TDGMI G</b>                | 2797.3 | <b>b<sub>23</sub>-NH<sub>3</sub></b> |
| 491.2               | <b>uIT</b>                                                    | 853.4 | <b>a<sub>5</sub></b>                | 1271.6               | <b>GuITLL QVEGT-NH<sub>3</sub></b>                            | 1820.9 | <b>ATGGuIT LLQVE GTDGM</b>                 | 2814.3 | <b>b<sub>23</sub></b>                |
| 492.2               | <b>TGGu</b>                                                   | 854.4 | <b>TLvATG-28</b>                    | 1279.1 <sup>+2</sup> | <b>y<sub>21</sub><sup>-</sup>-H<sub>2</sub>O<sup>+2</sup></b> | 1826.9 | <b>vATGG uITLLQ VEG-28</b>                 | 2826.3 | <b>a<sub>24</sub>-NH<sub>3</sub></b> |
| 494.7 <sup>+2</sup> | <b>y<sub>10</sub><sup>-</sup>-H<sub>2</sub>O<sup>+2</sup></b> | 854.5 | <b>ITLLQVEG</b>                     | 1279.6 <sup>+2</sup> | <b>y<sub>21</sub><sup>-</sup>-NH<sub>3</sub><sup>+2</sup></b> | 1832.9 | <b>y<sub>16</sub>-H<sub>2</sub>O</b>       | 2843.4 | <b>a<sub>24</sub></b>                |
| 495.2 <sup>+2</sup> | <b>y<sub>10</sub><sup>-</sup>-NH<sub>3</sub><sup>+2</sup></b> | 856.4 | <b>LLQVE GTD</b>                    | 1287.7               | <b>TLLQVE GTDGM IG-28</b>                                     | 1833.9 | <b>y<sub>16</sub>-NH<sub>3</sub></b>       | 2853.3 | <b>b<sub>24</sub>-H<sub>2</sub>O</b> |
| 497.2               | <b>QVEGT-H<sub>2</sub>O</b>                                   | 860.4 | <b>VEGTD GMIG</b>                   | 1288.1 <sup>+2</sup> | <b>y<sub>21</sub><sup>+2</sup></b>                            | 1834.9 | <b>TGGuIT LLQVE GTDGM I-28</b>             | 2854.3 | <b>b<sub>24</sub>-NH<sub>3</sub></b> |
| 498.2               | <b>QVEGT-NH<sub>3</sub></b>                                   | 862.5 | <b>ATGGuIT TL-28</b>                | 1288.7               | <b>TGGuIT LLQVE</b>                                           | 1836.9 | <b>vATGG uITLLQ VEG-H<sub>2</sub>O</b>     | 2871.4 | <b>b<sub>24</sub></b>                |
| 499.3               | <b>LQVEG-28</b>                                               | 863.4 | <b>b<sub>5</sub>-H<sub>2</sub>O</b> | 1288.7               | <b>GuITLL QVEGT</b>                                           | 1837.8 | <b>vATGG uITLLQ VEG-NH<sub>3</sub></b>     | 2884.4 | <b>y<sub>24</sub>-H<sub>2</sub>O</b> |
| 500.2               | <b>TDGMI-H<sub>2</sub>O</b>                                   | 864.4 | <b>TLvATG-H<sub>2</sub>O</b>        | 1297.6               | <b>TLLQVE GTDGM IG-H<sub>2</sub>O</b>                         | 1844.9 | <b>TGGuIT LLQVE GTDGM I-H<sub>2</sub>O</b> | 2885.4 | <b>y<sub>24</sub>-NH<sub>3</sub></b> |
| 502.2               | <b>VEGTD</b>                                                  | 872.4 | <b>ATGGuIT TL-H<sub>2</sub>O</b>    | 1298.6               | <b>TLLQVE GTDGM IG-NH<sub>3</sub></b>                         | 1845.9 | <b>TGGuIT LLQVE GTDGM I-NH<sub>3</sub></b> | 2902.4 | <b>y<sub>24</sub></b>                |
| 503.7 <sup>+2</sup> | <b>y<sub>10</sub><sup>+2</sup></b>                            | 874.5 | <b>GuITLL Q-28</b>                  | 1300.6               | <b>vATGG uITL-28</b>                                          | 1850.9 | <b>y<sub>16</sub></b>                      | 2999.5 | <b>MH-H<sub>2</sub>O</b>             |
| 504.2               | <b>GGuIT</b>                                                  | 881.4 | <b>b<sub>5</sub></b>                | 1300.6               | <b>LvATG GuIT-28</b>                                          | 1854.9 | <b>vATGG uITLLQ VEG</b>                    | 3000.4 | <b>MH-NH<sub>3</sub></b>             |
| 505.3               | <b>y<sub>5</sub></b>                                          | 882.4 | <b>TLvATG</b>                       | 1300.6               | <b>TLvATG GuIT-28</b>                                         | 1854.9 | <b>TLvATG GuITLL QV-28</b>                 | 3017.5 | <b>MH</b>                            |
| 509.3               | <b>LQVEG-H<sub>2</sub>O</b>                                   | 884.5 | <b>GuITLL Q-H<sub>2</sub>O</b>      | 1300.6               | <b>LTLvAT GGU-28</b>                                          | 1855.9 | <b>a<sub>14</sub></b>                      |        |                                      |
| 510.2               | <b>vA</b>                                                     | 885.5 | <b>GuITLL Q-NH<sub>3</sub></b>      | 1310.6               | <b>vATGG uITL-H<sub>2</sub>O</b>                              | 1862.9 | <b>TGGuITLLQVEGTDGMI</b>                   |        |                                      |

|       |                       |       |                  |        |                                |        |                                 |
|-------|-----------------------|-------|------------------|--------|--------------------------------|--------|---------------------------------|
| 510.3 | LQVEG-NH <sub>3</sub> | 885.5 | LLQVE<br>GTDG-28 | 1310.6 | LvATG<br>GuIT-H <sub>2</sub> O | 1864.9 | TLvATGGuITLLQV-H <sub>2</sub> O |
|-------|-----------------------|-------|------------------|--------|--------------------------------|--------|---------------------------------|

# KNITFEGGNITFGSR

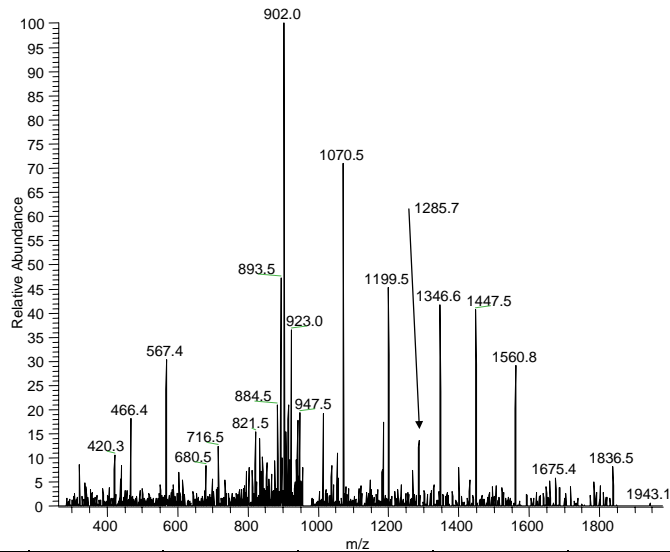

|                    |                                               |                     |                                                |                     |                                                                |                     |                                                                |        |                                     |
|--------------------|-----------------------------------------------|---------------------|------------------------------------------------|---------------------|----------------------------------------------------------------|---------------------|----------------------------------------------------------------|--------|-------------------------------------|
| 60.0               | S                                             | 361.2 <sup>+2</sup> | a <sub>5</sub> -NH <sub>3</sub> <sup>+2</sup>  | 587.3               | ITFEGG<br>-H <sub>2</sub> O                                    | 814.9 <sup>+2</sup> | b <sub>12</sub> <sup>-</sup><br>H <sub>2</sub> O <sup>+2</sup> | 1129.5 | uITFEG<br>Gu-28                     |
| 70.1               | R                                             | 362.2               | ul-28                                          | 591.3 <sup>+2</sup> | y <sub>10</sub> <sup>-</sup><br>H <sub>2</sub> O <sup>+2</sup> | 815.4 <sup>+2</sup> | b <sub>12</sub> <sup>-</sup><br>NH <sub>3</sub> <sup>+2</sup>  | 1129.5 | TFEGG<br>uITF                       |
| 74.1               | T                                             | 362.2               | ITF                                            | 591.3               | a <sub>4</sub>                                                 | 821.4               | GuITFG<br>S-H <sub>2</sub> O                                   | 1139.5 | uITFEG<br>Gu-H <sub>2</sub> O       |
| 79.6 <sup>+2</sup> | y <sub>1</sub> -NH <sub>3</sub> <sup>+2</sup> | 363.2               | GGu-28                                         | 591.8 <sup>+2</sup> | y <sub>10</sub> <sup>-</sup><br>NH <sub>3</sub> <sup>+2</sup>  | 823.9 <sup>+2</sup> | b <sub>12</sub> <sup>+2</sup>                                  | 1144.5 | FEGGuI<br>TFGS-<br>28               |
| 84.1               | K                                             | 363.2               | FEGG-<br>28                                    | 600.3 <sup>+2</sup> | y <sub>10</sub> <sup>+2</sup>                                  | 824.4               | uITFEG                                                         | 1154.5 | FEGGuI<br>TFGS-<br>H <sub>2</sub> O |
| 86.1               | I                                             | 365.2               | TFGS-<br>28                                    | 601.3               | b <sub>4</sub> -H <sub>2</sub> O                               | 829.9 <sup>+2</sup> | a <sub>13</sub> <sup>-</sup><br>NH <sub>3</sub> <sup>+2</sup>  | 1157.5 | uITFEG<br>Gu                        |
| 87.1               | GG-28                                         | 369.1 <sup>+2</sup> | a <sub>5</sub> <sup>+2</sup>                   | 602.3               | b <sub>4</sub> -NH <sub>3</sub>                                | 838.4 <sup>+2</sup> | a <sub>13</sub> <sup>+2</sup>                                  | 1158.5 | TFEGG<br>uITFG-<br>28               |
| 87.1               | R                                             | 373.2               | FEGG-<br>H <sub>2</sub> O                      | 605.3               | GGuIT                                                          | 839.4               | GuITFG<br>S                                                    | 1168.5 | TFEGG<br>uITFG-<br>H <sub>2</sub> O |
| 88.1 <sup>+2</sup> | y <sub>1</sub> <sup>+2</sup>                  | 374.7 <sup>+2</sup> | b <sub>5</sub> -H <sub>2</sub> O <sup>+2</sup> | 605.3               | EGGuI-<br>28                                                   | 843.4 <sup>+2</sup> | b <sub>13</sub> <sup>-</sup><br>H <sub>2</sub> O <sup>+2</sup> | 1172.5 | FEGGuI<br>TFGS                      |
| 100.1              | R                                             | 375.2               | TFGS-<br>H <sub>2</sub> O                      | 605.3               | ITFEGG                                                         | 843.9 <sup>+2</sup> | b <sub>13</sub> <sup>-</sup><br>NH <sub>3</sub> <sup>+2</sup>  | 1181.5 | y <sub>10</sub> -H <sub>2</sub> O   |
| 101.1              | K                                             | 375.2 <sup>+2</sup> | b <sub>5</sub> -NH <sub>3</sub> <sup>+2</sup>  | 610.3               | uITF-28                                                        | 850.4               | a <sub>6</sub> -NH <sub>3</sub>                                | 1182.5 | y <sub>10</sub> -NH <sub>3</sub>    |
| 102.1              | E                                             | 377.2               | a <sub>2</sub>                                 | 615.3               | EGGuI-<br>H <sub>2</sub> O                                     | 852.4 <sup>+2</sup> | b <sub>13</sub> <sup>+2</sup>                                  | 1186.5 | TFEGG<br>uITFG                      |
| 112.1              | R                                             | 378.2               | TFE                                            | 619.3               | b <sub>4</sub>                                                 | 853.4               | FEGGuI<br>T-28                                                 | 1199.6 | y <sub>10</sub>                     |
| 115.1              | GG                                            | 383.7 <sup>+2</sup> | b <sub>5</sub> <sup>+2</sup>                   | 620.3               | uITF-<br>H <sub>2</sub> O                                      | 853.4               | TFEGG<br>ul-28                                                 | 1214.6 | ITFEGG<br>uITF-28                   |



|                     |                                                  |                     |                                                  |                     |                                                              |                     |                                                              |        |                                                 |
|---------------------|--------------------------------------------------|---------------------|--------------------------------------------------|---------------------|--------------------------------------------------------------|---------------------|--------------------------------------------------------------|--------|-------------------------------------------------|
| 117.1               | <b>GS-28</b>                                     | 388.2               | <b>b<sub>2</sub>-NH<sub>3</sub></b>              | 620.8 <sup>+2</sup> | <b>a<sub>9</sub>-NH<sub>3</sub><sup>+2</sup></b>             | 853.4               | <b>EGGuIT F-28</b>                                           | 1224.6 | <b>ITFEGG uITF-H<sub>2</sub>O</b>               |
| 120.1               | <b>F</b>                                         | 390.2               | <b>ul</b>                                        | 629.3 <sup>+2</sup> | <b>a<sub>9</sub><sup>+2</sup></b>                            | 853.4               | <b>uITFEG G-28</b>                                           | 1240.6 | <b>a<sub>9</sub>-NH<sub>3</sub></b>             |
| 122.6 <sup>+2</sup> | <b>y<sub>2</sub>-H<sub>2</sub>O<sup>+2</sup></b> | 391.1               | <b>GGu</b>                                       | 633.3               | <b>EGGuI</b>                                                 | 853.4               | <b>ITFEGG u-28</b>                                           | 1242.6 | <b>uITFEG Gul-28</b>                            |
| 123.1 <sup>+2</sup> | <b>y<sub>2</sub>-NH<sub>3</sub><sup>+2</sup></b> | 391.2               | <b>FEGG</b>                                      | 634.3 <sup>+2</sup> | <b>b<sub>9</sub>-H<sub>2</sub>O<sup>+2</sup></b>             | 861.4 <sup>+2</sup> | <b>b<sub>13</sub>+H<sub>2</sub>O<sup>+2</sup></b>            | 1242.6 | <b>ITFEGG uITF</b>                              |
| 126.1               | <b>K</b>                                         | 391.2               | <b>ITFG-28</b>                                   | 634.8 <sup>+2</sup> | <b>b<sub>9</sub>-NH<sub>3</sub><sup>+2</sup></b>             | 863.4               | <b>FEGGuI T-H<sub>2</sub>O</b>                               | 1245.6 | <b>TFEGG uITFGS-28</b>                          |
| 127.1               | <b>GS-H<sub>2</sub>O</b>                         | 393.2               | <b>TFGS</b>                                      | 638.3               | <b>uITF</b>                                                  | 863.4               | <b>EGGuIT F-H<sub>2</sub>O</b>                               | 1252.6 | <b>uITFEG Gul-H<sub>2</sub>O</b>                |
| 129.1               | <b>K</b>                                         | 401.2               | <b>ITFG-H<sub>2</sub>O</b>                       | 639.3               | <b>FEGGu-28</b>                                              | 863.4               | <b>uITFEG G-H<sub>2</sub>O</b>                               | 1255.5 | <b>TFEGG uITFGS-H<sub>2</sub>O</b>              |
| 131.6 <sup>+2</sup> | <b>y<sub>2</sub><sup>+2</sup></b>                | 405.2               | <b>b<sub>2</sub></b>                             | 643.3 <sup>+2</sup> | <b>b<sub>9</sub><sup>+2</sup></b>                            | 863.4               | <b>TFEGG ul-H<sub>2</sub>O</b>                               | 1257.6 | <b>a<sub>9</sub></b>                            |
| 145.1               | <b>GS</b>                                        | 407.2               | <b>TFEG-28</b>                                   | 649.2               | <b>FEGGu-H<sub>2</sub>O</b>                                  | 863.4               | <b>ITFEGG u-H<sub>2</sub>O</b>                               | 1267.6 | <b>b<sub>9</sub>-H<sub>2</sub>O</b>             |
| 151.1 <sup>+2</sup> | <b>y<sub>3</sub>-H<sub>2</sub>O<sup>+2</sup></b> | 417.2               | <b>TFEG-H<sub>2</sub>O</b>                       | 649.7 <sup>+3</sup> | <b>MH-H<sub>2</sub>O<sup>+3</sup></b>                        | 867.4               | <b>a<sub>6</sub></b>                                         | 1268.6 | <b>b<sub>9</sub>-NH<sub>3</sub></b>             |
| 151.6 <sup>+2</sup> | <b>y<sub>3</sub>-NH<sub>3</sub><sup>+2</sup></b> | 419.2               | <b>Gul-28</b>                                    | 650.0 <sup>+3</sup> | <b>MH-NH<sub>3</sub><sup>+3</sup></b>                        | 868.4               | <b>GGuITF GS-28</b>                                          | 1270.6 | <b>uITFEG Gul</b>                               |
| 158.1               | <b>y<sub>1</sub>-NH<sub>3</sub></b>              | 419.2               | <b>ITFG</b>                                      | 655.7 <sup>+3</sup> | <b>MH<sup>+3</sup></b>                                       | 873.4 <sup>+2</sup> | <b>a<sub>14</sub><sup>-</sup>NH<sub>3</sub><sup>+2</sup></b> | 1271.6 | <b>ITFEGG uITFG-28</b>                          |
| 159.1               | <b>EG-28</b>                                     | 425.7 <sup>+2</sup> | <b>a<sub>6</sub>-NH<sub>3</sub><sup>+2</sup></b> | 662.4               | <b>y<sub>6</sub>-H<sub>2</sub>O</b>                          | 877.4               | <b>b<sub>6</sub>-H<sub>2</sub>O</b>                          | 1273.6 | <b>TFEGG uITFGS</b>                             |
| 160.1 <sup>+2</sup> | <b>y<sub>3</sub><sup>+2</sup></b>                | 434.2 <sup>+2</sup> | <b>a<sub>6</sub><sup>+2</sup></b>                | 663.3               | <b>y<sub>6</sub>-NH<sub>3</sub></b>                          | 878.4               | <b>GGuITF GS-H<sub>2</sub>O</b>                              | 1281.6 | <b>ITFEGG uITFG-H<sub>2</sub>O</b>              |
| 169.1               | <b>EG-H<sub>2</sub>O</b>                         | 435.2               | <b>TFEG</b>                                      | 664.8 <sup>+2</sup> | <b>y<sub>11</sub><sup>-</sup>H<sub>2</sub>O<sup>+2</sup></b> | 878.4               | <b>b<sub>6</sub>-NH<sub>3</sub></b>                          | 1285.6 | <b>b<sub>9</sub></b>                            |
| 175.1               | <b>y<sub>1</sub></b>                             | 439.2 <sup>+2</sup> | <b>b<sub>6</sub>-H<sub>2</sub>O<sup>+2</sup></b> | 665.3 <sup>+2</sup> | <b>y<sub>11</sub><sup>-</sup>NH<sub>3</sub><sup>+2</sup></b> | 881.4               | <b>FEGGuI T</b>                                              | 1299.6 | <b>ITFEGG uITFG</b>                             |
| 177.1               | <b>FG-28</b>                                     | 439.7 <sup>+2</sup> | <b>b<sub>6</sub>-NH<sub>3</sub><sup>+2</sup></b> | 667.3+2             | <b>FEGGu</b>                                                 | 881.4               | <b>uITFEG G</b>                                              | 1328.6 | <b>y<sub>11</sub>-H<sub>2</sub>O</b>            |
| 180.6 <sup>+2</sup> | <b>a<sub>2</sub>-NH<sub>3</sub><sup>+2</sup></b> | 447.2               | <b>Gul</b>                                       | 667.3               | <b>uITFG-28</b>                                              | 881.4               | <b>EGGuIT F</b>                                              | 1329.6 | <b>y<sub>11</sub>-NH<sub>3</sub></b>            |
| 187.1               | <b>EG</b>                                        | 448.2 <sup>+2</sup> | <b>b<sub>6</sub><sup>+2</sup></b>                | 667.3               | <b>GulTF-28</b>                                              | 881.4               | <b>TFEGG ul</b>                                              | 1343.6 | <b>uITFEG GuIT-28</b>                           |
| 187.1               | <b>IT-28</b>                                     | 448.2               | <b>y<sub>4</sub>-H<sub>2</sub>O</b>              | 673.8 <sup>+2</sup> | <b>y<sub>11</sub><sup>+2</sup></b>                           | 881.4               | <b>ITFEGG u</b>                                              | 1346.6 | <b>y<sub>11</sub></b>                           |
| 189.1 <sup>+2</sup> | <b>a<sub>2</sub><sup>+2</sup></b>                | 449.2               | <b>y<sub>4</sub>-NH<sub>3</sub></b>              | 677.3               | <b>uITFG-H<sub>2</sub>O</b>                                  | 881.9 <sup>+2</sup> | <b>a<sub>14</sub><sup>+2</sup></b>                           | 1353.6 | <b>uITFEG GuIT-H<sub>2</sub>O</b>               |
| 194.6 <sup>+2</sup> | <b>b<sub>2</sub>-NH<sub>3</sub><sup>+2</sup></b> | 454.2 <sup>+2</sup> | <b>a<sub>7</sub>-NH<sub>3</sub><sup>+2</sup></b> | 677.3               | <b>GulTF-H<sub>2</sub>O</b>                                  | 886.9 <sup>+2</sup> | <b>b<sub>14</sub><sup>-</sup>H<sub>2</sub>O<sup>+2</sup></b> | 1353.6 | <b>a<sub>10</sub><sup>-</sup>NH<sub>3</sub></b> |
| 197.1               | <b>IT-H<sub>2</sub>O</b>                         | 462.7 <sup>+2</sup> | <b>a<sub>7</sub><sup>+2</sup></b>                | 677.3 <sup>+2</sup> | <b>a<sub>10</sub><sup>-</sup>NH<sub>3</sub><sup>+2</sup></b> | 887.4 <sup>+2</sup> | <b>b<sub>14</sub><sup>-</sup>NH<sub>3</sub><sup>+2</sup></b> | 1358.6 | <b>ITFEGG uITFGS-28</b>                         |
| 203.1 <sup>+2</sup> | <b>b<sub>2</sub><sup>+2</sup></b>                | 463.2               | <b>uIT-28</b>                                    | 680.4               | <b>y<sub>6</sub></b>                                         | 895.4               | <b>b<sub>6</sub></b>                                         | 1368.6 | <b>ITFEGG uITFGS-H<sub>2</sub>O</b>             |

|                     |                                                  |                     |                                                  |                     |                                                              |                     |                                                              |        |                                      |
|---------------------|--------------------------------------------------|---------------------|--------------------------------------------------|---------------------|--------------------------------------------------------------|---------------------|--------------------------------------------------------------|--------|--------------------------------------|
| 205.1               | <b>FG</b>                                        | 463.3               | <b>ITFE-28</b>                                   | 685.8 <sup>+2</sup> | <b>a<sub>10</sub><sup>+2</sup></b>                           | 895.9 <sup>+2</sup> | <b>b<sub>14</sub><sup>+2</sup></b>                           | 1370.7 | <b>a<sub>10</sub></b>                |
| 215.1               | <b>IT</b>                                        | 464.2               | <b>TFEGG-28</b>                                  | 690.8 <sup>+2</sup> | <b>b<sub>10</sub>-H<sub>2</sub>O<sup>+2</sup></b>            | 896.4               | <b>GGuITFGS</b>                                              | 1371.6 | <b>uITFEGGuIT</b>                    |
| 216.1               | <b>EGG-28</b>                                    | 466.2               | <b>y<sub>4</sub></b>                             | 691.3 <sup>+2</sup> | <b>b<sub>10</sub>-NH<sub>3</sub><sup>+2</sup></b>            | 904.9 <sup>+2</sup> | <b>b<sub>14</sub>+H<sub>2</sub>O<sup>+2</sup></b>            | 1380.7 | <b>b<sub>10</sub>-H<sub>2</sub>O</b> |
| 221.1               | <b>TF-28</b>                                     | 467.7 <sup>+2</sup> | <b>b<sub>7</sub>-H<sub>2</sub>O<sup>+2</sup></b> | 695.3               | <b>uITFG</b>                                                 | 907.4               | <b>a<sub>7</sub>-NH<sub>3</sub></b>                          | 1381.6 | <b>b<sub>10</sub>-NH<sub>3</sub></b> |
| 224.6 <sup>+2</sup> | <b>y<sub>4</sub>-H<sub>2</sub>O<sup>+2</sup></b> | 468.2 <sup>+2</sup> | <b>b<sub>7</sub>-NH<sub>3</sub><sup>+2</sup></b> | 695.3               | <b>GuITF</b>                                                 | 909.9 <sup>+2</sup> | <b>y<sub>14</sub><sup>-</sup>H<sub>2</sub>O<sup>+2</sup></b> | 1386.6 | <b>ITFEGGuITFGS</b>                  |
| 225.1 <sup>+2</sup> | <b>y<sub>4</sub>-NH<sub>3</sub><sup>+2</sup></b> | 469.7 <sup>+2</sup> | <b>y<sub>7</sub>-H<sub>2</sub>O<sup>+2</sup></b> | 699.8 <sup>+2</sup> | <b>b<sub>10</sub><sup>+2</sup></b>                           | 910.4               | <b>EGGuITFG-28</b>                                           | 1398.7 | <b>b<sub>10</sub></b>                |
| 226.1               | <b>EGG-H<sub>2</sub>O</b>                        | 470.2 <sup>+2</sup> | <b>y<sub>7</sub>-NH<sub>3</sub><sup>+2</sup></b> | 706.3               | <b>EGGuIT-28</b>                                             | 910.4 <sup>+2</sup> | <b>y<sub>14</sub><sup>-</sup>NH<sub>3</sub><sup>+2</sup></b> | 1429.7 | <b>y<sub>12</sub>-H<sub>2</sub>O</b> |
| 231.1               | <b>TF-H<sub>2</sub>O</b>                         | 473.2               | <b>uIT-H<sub>2</sub>O</b>                        | 715.3 <sup>+2</sup> | <b>y<sub>12</sub><sup>-</sup>H<sub>2</sub>O<sup>+2</sup></b> | 918.9 <sup>+2</sup> | <b>y<sub>14</sub><sup>+2</sup></b>                           | 1430.6 | <b>y<sub>12</sub>-NH<sub>3</sub></b> |
| 233.6 <sup>+2</sup> | <b>y<sub>4</sub><sup>+2</sup></b>                | 473.2               | <b>ITFE-H<sub>2</sub>O</b>                       | 715.8 <sup>+2</sup> | <b>y<sub>12</sub><sup>-</sup>NH<sub>3</sub><sup>+2</sup></b> | 920.4               | <b>EGGuITFG-H<sub>2</sub>O</b>                               | 1447.7 | <b>y<sub>12</sub></b>                |
| 237.1 <sup>+2</sup> | <b>a<sub>3</sub>-NH<sub>3</sub><sup>+2</sup></b> | 473.3               | <b>a<sub>3</sub>-NH<sub>3</sub></b>              | 716.3               | <b>EGGuIT-H<sub>2</sub>O</b>                                 | 924.5               | <b>a<sub>7</sub></b>                                         | 1454.7 | <b>a<sub>11</sub>-NH<sub>3</sub></b> |
| 244.1               | <b>EGG</b>                                       | 474.2               | <b>TFEGG-H<sub>2</sub>O</b>                      | 721.4               | <b>a<sub>5</sub>-NH<sub>3</sub></b>                          | 934.5               | <b>b<sub>7</sub>-H<sub>2</sub>O</b>                          | 1471.7 | <b>a<sub>11</sub></b>                |
| 244.1               | <b>y<sub>2</sub>-H<sub>2</sub>O</b>              | 476.2               | <b>GGuIT-28</b>                                  | 724.3 <sup>+2</sup> | <b>y<sub>12</sub><sup>+2</sup></b>                           | 935.4               | <b>b<sub>7</sub>-NH<sub>3</sub></b>                          | 1481.7 | <b>b<sub>11</sub>-H<sub>2</sub>O</b> |
| 245.1               | <b>y<sub>2</sub>-NH<sub>3</sub></b>              | 476.7 <sup>+2</sup> | <b>b<sub>7</sub><sup>+2</sup></b>                | 724.4               | <b>GuITFG-28</b>                                             | 938.4               | <b>EGGuITFG</b>                                              | 1482.7 | <b>b<sub>11</sub>-NH<sub>3</sub></b> |
| 245.7 <sup>+2</sup> | <b>a<sub>3</sub><sup>+2</sup></b>                | 478.3               | <b>ITFGS-28</b>                                  | 724.4               | <b>GGuITF-28</b>                                             | 938.5               | <b>y<sub>7</sub>-H<sub>2</sub>O</b>                          | 1490.7 | <b>uITFEGGuITF-28</b>                |
| 249.1               | <b>TF</b>                                        | 478.7 <sup>+2</sup> | <b>y<sub>7</sub><sup>+2</sup></b>                | 727.9 <sup>+2</sup> | <b>a<sub>11</sub>-NH<sub>3</sub><sup>+2</sup></b>            | 939.4               | <b>y<sub>7</sub>-NH<sub>3</sub></b>                          | 1499.7 | <b>b<sub>11</sub></b>                |
| 249.1               | <b>FE-28</b>                                     | 482.7 <sup>+2</sup> | <b>a<sub>8</sub>-NH<sub>3</sub><sup>+2</sup></b> | 734.3               | <b>EGGuIT</b>                                                | 952.5               | <b>b<sub>7</sub></b>                                         | 1500.7 | <b>uITFEGGuITF-H<sub>2</sub>O</b>    |
| 251.1 <sup>+2</sup> | <b>b<sub>3</sub>-NH<sub>3</sub><sup>+2</sup></b> | 488.3               | <b>ITFGS-H<sub>2</sub>O</b>                      | 734.3               | <b>GuITFG-H<sub>2</sub>O</b>                                 | 954.4               | <b>TFEGGuIT-28</b>                                           | 1518.7 | <b>uITFEGGuITF</b>                   |
| 259.1               | <b>FE-H<sub>2</sub>O</b>                         | 490.3               | <b>a<sub>3</sub></b>                             | 734.3               | <b>GGuITF-H<sub>2</sub>O</b>                                 | 956.5               | <b>y<sub>7</sub></b>                                         | 1542.7 | <b>y<sub>13</sub>-H<sub>2</sub>O</b> |
| 259.7 <sup>+2</sup> | <b>b<sub>3</sub><sup>+2</sup></b>                | 491.2               | <b>uIT</b>                                       | 736.4 <sup>+2</sup> | <b>a<sub>11</sub><sup>+2</sup></b>                           | 964.4               | <b>TFEGGuIT-H<sub>2</sub>O</b>                               | 1543.7 | <b>y<sub>13</sub>-NH<sub>3</sub></b> |
| 262.2               | <b>y<sub>2</sub></b>                             | 491.3 <sup>+2</sup> | <b>a<sub>8</sub><sup>+2</sup></b>                | 738.4               | <b>a<sub>5</sub></b>                                         | 964.5               | <b>a<sub>8</sub>-NH<sub>3</sub></b>                          | 1547.7 | <b>uITFEGGuITFG-28</b>               |
| 264.1               | <b>FGS-28</b>                                    | 491.3               | <b>ITFE</b>                                      | 739.4               | <b>uITFE-28</b>                                              | 966.5               | <b>ITFEGGuIT-28</b>                                          | 1557.7 | <b>uITFEGGuITFG-H<sub>2</sub>O</b>   |
| 274.1               | <b>FGS-H<sub>2</sub>O</b>                        | 492.2               | <b>EGGu-28</b>                                   | 740.3               | <b>TFEGGu-28</b>                                             | 974.0 <sup>+2</sup> | <b>MH-H<sub>2</sub>O<sup>+2</sup></b>                        | 1560.8 | <b>y<sub>13</sub></b>                |
| 275.1 <sup>+2</sup> | <b>y<sub>5</sub>-H<sub>2</sub>O<sup>+2</sup></b> | 492.2               | <b>TFEGG</b>                                     | 741.4 <sup>+2</sup> | <b>b<sub>11</sub>-H<sub>2</sub>O<sup>+2</sup></b>            | 974.5 <sup>+2</sup> | <b>MH-NH<sub>3</sub><sup>+2</sup></b>                        | 1575.7 | <b>uITFEGGuITFG</b>                  |
| 275.6 <sup>+2</sup> | <b>y<sub>5</sub>-NH<sub>3</sub><sup>+2</sup></b> | 496.2 <sup>+2</sup> | <b>b<sub>8</sub>-H<sub>2</sub>O<sup>+2</sup></b> | 741.9 <sup>+2</sup> | <b>b<sub>11</sub>-NH<sub>3</sub><sup>+2</sup></b>            | 976.5               | <b>ITFEGGuIT-H<sub>2</sub>O</b>                              | 1601.8 | <b>a<sub>12</sub>-NH<sub>3</sub></b> |
| 277.1               | <b>FE</b>                                        | 496.7 <sup>+2</sup> | <b>b<sub>8</sub>-NH<sub>3</sub><sup>+2</sup></b> | 748.4               | <b>b<sub>5</sub>-H<sub>2</sub>O</b>                          | 981.5               | <b>a<sub>8</sub></b>                                         | 1618.8 | <b>a<sub>12</sub></b>                |
| 278.1               | <b>TFG-28</b>                                    | 498.2 <sup>+2</sup> | <b>y<sub>8</sub>-H<sub>2</sub>O<sup>+2</sup></b> | 749.3               | <b>uITFE-H<sub>2</sub>O</b>                                  | 982.4               | <b>TFEGGuIT</b>                                              | 1628.8 | <b>b<sub>12</sub>-H<sub>2</sub>O</b> |
| 284.2 <sup>+2</sup> | <b>y<sub>5</sub><sup>+2</sup></b>                | 498.7 <sup>+2</sup> | <b>y<sub>8</sub>-NH<sub>3</sub><sup>+2</sup></b> | 749.4               | <b>b<sub>5</sub>-NH<sub>3</sub></b>                          | 983.0 <sup>+2</sup> | <b>MH<sup>+2</sup></b>                                       | 1629.8 | <b>b<sub>12</sub>-NH<sub>3</sub></b> |

|                     |                                                  |                            |                                                  |                     |                                                                   |        |                                           |        |                                               |
|---------------------|--------------------------------------------------|----------------------------|--------------------------------------------------|---------------------|-------------------------------------------------------------------|--------|-------------------------------------------|--------|-----------------------------------------------|
| 287.7 <sup>+2</sup> | <b>a<sub>4</sub>-NH<sub>3</sub><sup>+2</sup></b> | 501.3                      | <b>b<sub>3</sub>-NH<sub>3</sub></b>              | 750.3               | <b>TFEGG<br/>u-H<sub>2</sub>O</b>                                 | 991.5  | <b>b<sub>8</sub>-H<sub>2</sub>O</b>       | 1634.7 | <b>uITFEG<br/>GuITFG<br/>S-28</b>             |
| 288.1               | <b>TFG-<br/>H<sub>2</sub>O</b>                   | 502.2                      | <b>EGGu-<br/>H<sub>2</sub>O</b>                  | 750.4 <sup>+2</sup> | <b>b<sub>11</sub><sup>+2</sup></b>                                | 992.5  | <b>b<sub>8</sub>-NH<sub>3</sub></b>       | 1644.7 | <b>uITFEG<br/>GuITFG<br/>S-H<sub>2</sub>O</b> |
| 292.1               | <b>FGS</b>                                       | 504.2                      | <b>GGul</b>                                      | 752.3               | <b>GuITFG</b>                                                     | 994.5  | <b>ITFEGG<br/>ul</b>                      | 1646.8 | <b>b<sub>12</sub></b>                         |
| 296.2 <sup>+2</sup> | <b>a<sub>4</sub><sup>+2</sup></b>                | 505.3 <sup>+2</sup>        | <b>b<sub>8</sub><sup>+2</sup></b>                | 752.3               | <b>FEGGuI<br/>-28</b>                                             | 995.5  | <b>y<sub>8</sub>-H<sub>2</sub>O</b>       | 1658.8 | <b>a<sub>13</sub>-NH<sub>3</sub></b>          |
| 301.2               | <b>y<sub>3</sub>-H<sub>2</sub>O</b>              | 506.3                      | <b>ITFGS</b>                                     | 752.3               | <b>GGuITF</b>                                                     | 996.5  | <b>y<sub>8</sub>-NH<sub>3</sub></b>       | 1662.7 | <b>uITFEG<br/>GuITFG<br/>S</b>                |
| 301.2 <sup>+2</sup> | <b>b<sub>4</sub>-H<sub>2</sub>O<sup>+2</sup></b> | 507.248<br>5 <sup>+2</sup> | <b>y<sub>8</sub><sup>+2</sup></b>                | 754.4               | <b>uITFGS-<br/>28</b>                                             | 997.4  | <b>EGGuIT<br/>FGS-28</b>                  | 1675.8 | <b>a<sub>13</sub></b>                         |
| 301.7 <sup>+2</sup> | <b>b<sub>4</sub>-NH<sub>3</sub><sup>+2</sup></b> | 518.3                      | <b>b<sub>3</sub></b>                             | 762.3               | <b>FEGGuI<br/>-H<sub>2</sub>O</b>                                 | 1000.5 | <b>FEGGuI<br/>TF-28</b>                   | 1685.8 | <b>b<sub>13</sub>-H<sub>2</sub>O</b>          |
| 302.1               | <b>y<sub>3</sub>-NH<sub>3</sub></b>              | 520.2                      | <b>EGGu</b>                                      | 764.3               | <b>uITFGS-<br/>H<sub>2</sub>O</b>                                 | 1007.4 | <b>EGGuIT<br/>FGS-<br/>H<sub>2</sub>O</b> | 1686.8 | <b>b<sub>13</sub>-NH<sub>3</sub></b>          |
| 306.1               | <b>Gu-28</b>                                     | 520.3                      | <b>GuIT-28</b>                                   | 766.4               | <b>b<sub>5</sub></b>                                              | 1009.5 | <b>b<sub>8</sub></b>                      | 1703.8 | <b>b<sub>13</sub></b>                         |
| 306.1               | <b>TFG</b>                                       | 520.3                      | <b>ITFEG-<br/>28</b>                             | 767.3               | <b>uITFE</b>                                                      | 1010.4 | <b>FEGGuI<br/>TF-H<sub>2</sub>O</b>       | 1721.8 | <b>b<sub>13</sub>+H<sub>2</sub>O</b>          |
| 306.1               | <b>FEG-28</b>                                    | 526.8 <sup>+2</sup>        | <b>y<sub>9</sub>-H<sub>2</sub>O<sup>+2</sup></b> | 768.3               | <b>TFEGG<br/>u</b>                                                | 1013.5 | <b>y<sub>8</sub></b>                      | 1745.8 | <b>a<sub>14</sub>-NH<sub>3</sub></b>          |
| 310.2 <sup>+2</sup> | <b>b<sub>4</sub><sup>+2</sup></b>                | 527.3 <sup>+2</sup>        | <b>y<sub>9</sub>-NH<sub>3</sub><sup>+2</sup></b> | 771.9 <sup>+2</sup> | <b>y<sub>13</sub><sup>-</sup><br/>H<sub>2</sub>O<sup>+2</sup></b> | 1025.4 | <b>EGGuIT<br/>FGS</b>                     | 1762.8 | <b>a<sub>14</sub></b>                         |
| 316.1               | <b>FEG-<br/>H<sub>2</sub>O</b>                   | 530.2                      | <b>GuIT-<br/>H<sub>2</sub>O</b>                  | 772.4 <sup>+2</sup> | <b>y<sub>13</sub><sup>-</sup><br/>NH<sub>3</sub><sup>+2</sup></b> | 1028.5 | <b>FEGGuI<br/>TF</b>                      | 1772.8 | <b>b<sub>14</sub>-H<sub>2</sub>O</b>          |
| 319.2               | <b>y<sub>3</sub></b>                             | 530.3                      | <b>ITFEG-<br/>H<sub>2</sub>O</b>                 | 780.3               | <b>FEGGuI</b>                                                     | 1052.5 | <b>y<sub>9</sub>-H<sub>2</sub>O</b>       | 1773.8 | <b>b<sub>14</sub>-NH<sub>3</sub></b>          |
| 331.7 <sup>+2</sup> | <b>y<sub>6</sub>-H<sub>2</sub>O<sup>+2</sup></b> | 535.8 <sup>+2</sup>        | <b>y<sub>9</sub><sup>+2</sup></b>                | 780.9 <sup>+2</sup> | <b>y<sub>13</sub><sup>+2</sup></b>                                | 1053.5 | <b>y<sub>9</sub>-NH<sub>3</sub></b>       | 1790.8 | <b>b<sub>14</sub></b>                         |
| 332.2 <sup>+2</sup> | <b>y<sub>6</sub>-NH<sub>3</sub><sup>+2</sup></b> | 548.3                      | <b>GuIT</b>                                      | 781.4               | <b>GGuITF<br/>G-28</b>                                            | 1057.5 | <b>FEGGuI<br/>TFG-28</b>                  | 1808.8 | <b>b<sub>14</sub>+H<sub>2</sub>O</b>          |
| 334.1               | <b>Gu</b>                                        | 548.3                      | <b>ITFEG</b>                                     | 782.4               | <b>uITFGS</b>                                                     | 1067.5 | <b>FEGGuI<br/>TFG-<br/>H<sub>2</sub>O</b> | 1818.8 | <b>y<sub>14</sub>-H<sub>2</sub>O</b>          |
| 334.1               | <b>FEG</b>                                       | 549.3                      | <b>y<sub>5</sub>-H<sub>2</sub>O</b>              | 791.4               | <b>GGuITF<br/>G-H<sub>2</sub>O</b>                                | 1067.5 | <b>ITFEGG<br/>uIT-28</b>                  | 1819.8 | <b>y<sub>14</sub>-NH<sub>3</sub></b>          |
| 334.2               | <b>ITF-28</b>                                    | 550.3                      | <b>y<sub>5</sub>-NH<sub>3</sub></b>              | 796.4               | <b>uITFEG-<br/>28</b>                                             | 1070.5 | <b>y<sub>9</sub></b>                      | 1836.8 | <b>y<sub>14</sub></b>                         |
| 340.7 <sup>+2</sup> | <b>y<sub>6</sub><sup>+2</sup></b>                | 567.3                      | <b>y<sub>5</sub></b>                             | 801.4 <sup>+2</sup> | <b>a<sub>12</sub><sup>-</sup><br/>NH<sub>3</sub><sup>+2</sup></b> | 1077.5 | <b>ITFEGG<br/>uIT-H<sub>2</sub>O</b>      | 1946.9 | <b>MH-H<sub>2</sub>O</b>                      |
| 344.2               | <b>ITF-H<sub>2</sub>O</b>                        | 574.3                      | <b>a<sub>4</sub>-NH<sub>3</sub></b>              | 806.4               | <b>uITFEG-<br/>H<sub>2</sub>O</b>                                 | 1085.5 | <b>FEGGuI<br/>TFG</b>                     | 1947.9 | <b>MH-NH<sub>3</sub></b>                      |
| 350.2               | <b>TFE-28</b>                                    | 577.3                      | <b>GGuIT-<br/>28</b>                             | 809.4               | <b>GGuITF<br/>G</b>                                               | 1095.5 | <b>ITFEGG<br/>uIT</b>                     | 1964.9 | <b>MH</b>                                     |
| 360.2               | <b>TFE-<br/>H<sub>2</sub>O</b>                   | 577.3                      | <b>ITFEGG<br/>-28</b>                            | 809.9 <sup>+2</sup> | <b>a<sub>12</sub><sup>+2</sup></b>                                | 1101.5 | <b>TFEGGuITF-28</b>                       |        |                                               |
| 360.2               | <b>a<sub>2</sub>-NH<sub>3</sub></b>              | 587.3                      | <b>GGuIT-<br/>H<sub>2</sub>O</b>                 | 811.4               | <b>GuITFG<br/>S-28</b>                                            | 1111.5 | <b>TFEGGuITF-H<sub>2</sub>O</b>           |        |                                               |

# KNITFEGGNITFGSR MS/MS on C13 isotope

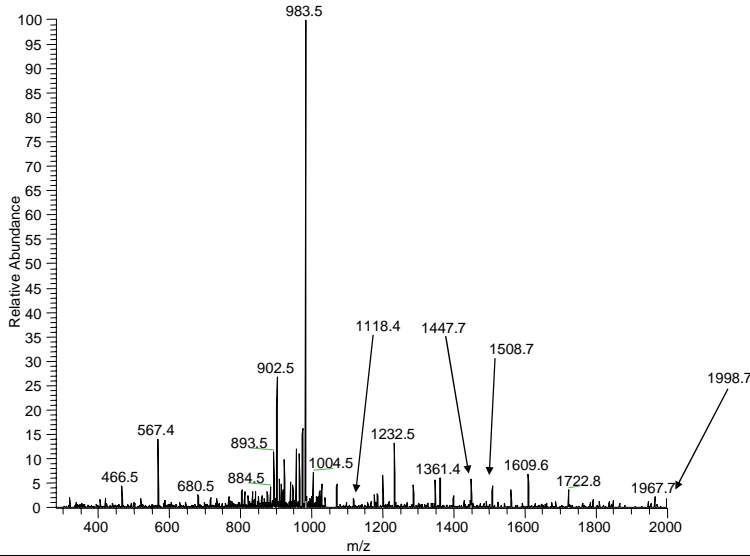

|                    |                                                  |                     |                                                  |                      |                                                              |                     |                                                              |        |                                      |
|--------------------|--------------------------------------------------|---------------------|--------------------------------------------------|----------------------|--------------------------------------------------------------|---------------------|--------------------------------------------------------------|--------|--------------------------------------|
| 60.0               | <b>S</b>                                         | 365.2               | <b>TFGS-28</b>                                   | 653.3                | <b>vIT</b>                                                   | 907.4               | <b>a<sub>7</sub>-NH<sub>3</sub></b>                          | 1291.5 | <b>uITFEG Gv-28</b>                  |
| 70.1               | <b>R</b>                                         | 369.7 <sup>+2</sup> | <b>a<sub>5</sub><sup>+2</sup></b>                | 654.2                | <b>EGGv-28</b>                                               | 910.9 <sup>+2</sup> | <b>a<sub>13</sub><sup>-</sup>NH<sub>3</sub><sup>+2</sup></b> | 1291.6 | <b>TFEGG vITF</b>                    |
| 74.1               | <b>T</b>                                         | 373.2               | <b>FEGG-H<sub>2</sub>O</b>                       | 662.4                | <b>y<sub>6</sub>-H<sub>2</sub>O</b>                          | 912.3               | <b>TFEGG v-H<sub>2</sub>O</b>                                | 1301.5 | <b>uITFEG Gv-H<sub>2</sub>O</b>      |
| 79.6 <sup>+2</sup> | <b>y<sub>1</sub>-NH<sub>3</sub><sup>+2</sup></b> | 374.7 <sup>+2</sup> | <b>b<sub>5</sub>-H<sub>2</sub>O<sup>+2</sup></b> | 663.3                | <b>y<sub>6</sub>-NH<sub>3</sub></b>                          | 914.4               | <b>GvITFG</b>                                                | 1306.6 | <b>FEGGvI TFGS-28</b>                |
| 84.1               | <b>K</b>                                         | 375.2               | <b>TFGS-H<sub>2</sub>O</b>                       | 664.2                | <b>EGGv-H<sub>2</sub>O</b>                                   | 914.4               | <b>GGvITF</b>                                                | 1316.6 | <b>FEGGvI TFGS-H<sub>2</sub>O</b>    |
| 86.1               | <b>I</b>                                         | 375.2 <sup>+2</sup> | <b>b<sub>5</sub>-NH<sub>3</sub><sup>+2</sup></b> | 666.3                | <b>GGvI</b>                                                  | 914.4               | <b>FEGGvI -28</b>                                            | 1319.5 | <b>uITFEG Gv</b>                     |
| 87.1               | <b>GG-28</b>                                     | 377.2               | <b>a<sub>2</sub></b>                             | 672.3 <sup>+2</sup>  | <b>y<sub>10</sub><sup>-</sup>H<sub>2</sub>O<sup>+2</sup></b> | 916.4               | <b>vITFGS-28</b>                                             | 1320.6 | <b>TFEGG vITFG-28</b>                |
| 87.1               | <b>R</b>                                         | 378.2               | <b>TFE</b>                                       | 672.8 <sup>+2</sup>  | <b>y<sub>10</sub><sup>-</sup>NH<sub>3</sub><sup>+2</sup></b> | 919.4 <sup>+2</sup> | <b>a<sub>13</sub><sup>+2</sup></b>                           | 1330.6 | <b>TFEGG vITFG-H<sub>2</sub>O</b>    |
| 88.1 <sup>+2</sup> | <b>y<sub>1</sub><sup>+2</sup></b>                | 383.7 <sup>+2</sup> | <b>b<sub>5</sub><sup>+2</sup></b>                | 680.4                | <b>y<sub>6</sub></b>                                         | 924.4               | <b>FEGGvI -H<sub>2</sub>O</b>                                | 1334.6 | <b>FEGGvI TFGS</b>                   |
| 100.1              | <b>R</b>                                         | 388.2               | <b>b<sub>2</sub>-NH<sub>3</sub></b>              | 681.30 <sup>+2</sup> | <b>y<sub>10</sub><sup>+2</sup></b>                           | 924.4 <sup>+2</sup> | <b>b<sub>13</sub><sup>-</sup>H<sub>2</sub>O<sup>+2</sup></b> | 1343.6 | <b>y<sub>10</sub>-H<sub>2</sub>O</b> |
| 101.1              | <b>K</b>                                         | 390.2               | <b>uI</b>                                        | 682.2                | <b>EGGv</b>                                                  | 924.5               | <b>a<sub>7</sub></b>                                         | 1344.6 | <b>y<sub>10</sub>-NH<sub>3</sub></b> |
| 102.1              | <b>E</b>                                         | 391.2               | <b>FEGG</b>                                      | 682.3                | <b>GvIT-28</b>                                               | 924.9 <sup>+2</sup> | <b>b<sub>13</sub><sup>-</sup>NH<sub>3</sub><sup>+2</sup></b> | 1348.6 | <b>TFEGG vITFG</b>                   |
| 112.1              | <b>R</b>                                         | 391.2               | <b>ITFG-28</b>                                   | 692.3                | <b>GvIT-H<sub>2</sub>O</b>                                   | 926.4               | <b>vITFGS-H<sub>2</sub>O</b>                                 | 1361.6 | <b>y<sub>10</sub></b>                |
| 115.1              | <b>GG</b>                                        | 393.2               | <b>TFGS</b>                                      | 701.8 <sup>+2</sup>  | <b>a<sub>9</sub>-NH<sub>3</sub><sup>+2</sup></b>             | 930.4               | <b>TFEGG v</b>                                               | 1376.6 | <b>ITFEGG vITF-28</b>                |
| 117.1              | <b>GS-28</b>                                     | 401.2               | <b>ITFG-H<sub>2</sub>O</b>                       | 703.7 <sup>+3</sup>  | <b>MH-H<sub>2</sub>O<sup>+3</sup></b>                        | 933.4 <sup>+2</sup> | <b>b<sub>13</sub><sup>+2</sup></b>                           | 1386.6 | <b>ITFEGG vITF-H<sub>2</sub>O</b>    |
| 120.1              | <b>F</b>                                         | 405.2               | <b>b<sub>2</sub></b>                             | 704.0 <sup>+3</sup>  | <b>MH-</b>                                                   | 934.5               | <b>b<sub>7</sub>-H<sub>2</sub>O</b>                          | 1402.6 | <b>a<sub>9</sub>-NH<sub>3</sub></b>  |

|                     |                                      |                     |                                                  |                     |                                                              |                      |                                                              |        |                                      |
|---------------------|--------------------------------------|---------------------|--------------------------------------------------|---------------------|--------------------------------------------------------------|----------------------|--------------------------------------------------------------|--------|--------------------------------------|
|                     |                                      |                     |                                                  |                     | $\text{NH}_3^{+3}$                                           |                      |                                                              |        |                                      |
| 122.6 <sup>+2</sup> | $\text{y}_2\text{-H}_2\text{O}^{+2}$ | 407.2               | <b>TFEG-28</b>                                   | 709.7 <sup>+3</sup> | <b>MH<sup>+3</sup></b>                                       | 935.4                | <b>b<sub>7</sub>-NH<sub>3</sub></b>                          | 1404.6 | <b>uITFEG GvI-28</b>                 |
| 123.1 <sup>+2</sup> | $\text{y}_2\text{-NH}_3^{+2}$        | 417.2               | <b>TFEG-H<sub>2</sub>O</b>                       | 710.3               | <b>GvIT</b>                                                  | 942.4                | <b>FEGGvI</b>                                                | 1404.6 | <b>ITFEGG vITF</b>                   |
| 126.1               | <b>K</b>                             | 419.2               | <b>ITFG</b>                                      | 710.3 <sup>+2</sup> | <b>a<sub>9</sub><sup>+2</sup></b>                            | 942.4 <sup>+2</sup>  | <b>b<sub>13</sub>+H<sub>2</sub>O<sup>+2</sup></b>            | 1407.6 | <b>TFEGG vITFGS-28</b>               |
| 127.1               | <b>GS-H<sub>2</sub>O</b>             | 425.7 <sup>+2</sup> | <b>a<sub>6</sub>-NH<sub>3</sub><sup>+2</sup></b> | 715.3 <sup>+2</sup> | <b>b<sub>9</sub>-H<sub>2</sub>O<sup>+2</sup></b>             | 943.4                | <b>GGvITF G-28</b>                                           | 1414.6 | <b>uITFEG GvI-H<sub>2</sub>O</b>     |
| 129.1               | <b>K</b>                             | 434.3 <sup>+2</sup> | <b>a<sub>6</sub><sup>+2</sup></b>                | 715.8 <sup>+2</sup> | <b>b<sub>9</sub>-NH<sub>3</sub><sup>+2</sup></b>             | 944.4                | <b>vITFGS</b>                                                | 1417.6 | <b>TFEGG vITFGS-H<sub>2</sub>O</b>   |
| 131.6 <sup>+2</sup> | <b>y<sub>2</sub><sup>+2</sup></b>    | 435.2               | <b>TFEG</b>                                      | 721.4               | <b>a<sub>5</sub>-NH<sub>3</sub></b>                          | 952.5                | <b>b<sub>7</sub></b>                                         | 1419.6 | <b>a<sub>9</sub></b>                 |
| 145.1               | <b>GS</b>                            | 439.2 <sup>+2</sup> | <b>b<sub>6</sub>-H<sub>2</sub>O<sup>+2</sup></b> | 724.3 <sup>+2</sup> | <b>b<sub>9</sub><sup>+2</sup></b>                            | 953.4                | <b>GGvITF G-H<sub>2</sub>O</b>                               | 1429.6 | <b>b<sub>9</sub>-H<sub>2</sub>O</b>  |
| 151.1 <sup>+2</sup> | $\text{y}_3\text{-H}_2\text{O}^{+2}$ | 439.7 <sup>+2</sup> | <b>b<sub>6</sub>-NH<sub>3</sub><sup>+2</sup></b> | 738.4               | <b>a<sub>5</sub></b>                                         | 954.4 <sup>+2</sup>  | <b>a<sub>14</sub><sup>-</sup>NH<sub>3</sub><sup>+2</sup></b> | 1430.6 | <b>b<sub>9</sub>-NH<sub>3</sub></b>  |
| 151.6 <sup>+2</sup> | $\text{y}_3\text{-NH}_3^{+2}$        | 448.2 <sup>+2</sup> | <b>b<sub>6</sub><sup>+2</sup></b>                | 739.3               | <b>GGvIT-28</b>                                              | 963.0 <sup>+2</sup>  | <b>a<sub>14</sub><sup>+2</sup></b>                           | 1432.6 | <b>uITFEG GvI</b>                    |
| 158.1               | <b>y<sub>1</sub>-NH<sub>3</sub></b>  | 448.2               | <b>y<sub>4</sub>-H<sub>2</sub>O</b>              | 739.4               | <b>uITFE-28</b>                                              | 964.5                | <b>a<sub>8</sub>-NH<sub>3</sub></b>                          | 1433.7 | <b>ITFEGG vITFG-28</b>               |
| 159.1               | <b>EG-28</b>                         | 449.2               | <b>y<sub>4</sub>-NH<sub>3</sub></b>              | 745.8 <sup>+2</sup> | <b>y<sub>11</sub><sup>-</sup>H<sub>2</sub>O<sup>+2</sup></b> | 967.9 <sup>+2</sup>  | <b>b<sub>14</sub><sup>-</sup>H<sub>2</sub>O<sup>+2</sup></b> | 1435.6 | <b>TFEGG vITFGS</b>                  |
| 160.1 <sup>+2</sup> | <b>y<sub>3</sub><sup>+2</sup></b>    | 454.2 <sup>+2</sup> | <b>a<sub>7</sub>-NH<sub>3</sub><sup>+2</sup></b> | 746.3 <sup>+2</sup> | <b>y<sub>11</sub><sup>-</sup>NH<sub>3</sub><sup>+2</sup></b> | 968.4 <sup>+2</sup>  | <b>b<sub>14</sub><sup>-</sup>NH<sub>3</sub><sup>+2</sup></b> | 1443.7 | <b>ITFEGG vITFG-H<sub>2</sub>O</b>   |
| 169.1               | <b>EG-H<sub>2</sub>O</b>             | 462.7 <sup>+2</sup> | <b>a<sub>7</sub><sup>+2</sup></b>                | 748.4               | <b>b<sub>5</sub>-H<sub>2</sub>O</b>                          | 971.4                | <b>GGvITF G</b>                                              | 1447.6 | <b>b<sub>9</sub></b>                 |
| 175.1               | <b>y<sub>1</sub></b>                 | 463.2               | <b>uIT-28</b>                                    | 749.3               | <b>GGvIT-H<sub>2</sub>O</b>                                  | 973.4                | <b>GvITFG S-28</b>                                           | 1461.7 | <b>ITFEGG vITFG</b>                  |
| 177.1               | <b>FG-28</b>                         | 463.3               | <b>ITFE-28</b>                                   | 749.3               | <b>uITFE-H<sub>2</sub>O</b>                                  | 977.0 <sup>+2</sup>  | <b>b<sub>14</sub><sup>+2</sup></b>                           | 1490.7 | <b>y<sub>11</sub>-H<sub>2</sub>O</b> |
| 180.6 <sup>+2</sup> | $\text{a}_2\text{-NH}_3^{+2}$        | 464.2               | <b>TFEGG-28</b>                                  | 749.4               | <b>b<sub>5</sub>-NH<sub>3</sub></b>                          | 981.5                | <b>a<sub>8</sub></b>                                         | 1491.6 | <b>y<sub>11</sub>-NH<sub>3</sub></b> |
| 187.1               | <b>EG</b>                            | 466.2               | <b>y<sub>4</sub></b>                             | 754.8 <sup>+2</sup> | <b>y<sub>11</sub><sup>+2</sup></b>                           | 983.4                | <b>GvITFG S-H<sub>2</sub>O</b>                               | 1505.7 | <b>uITFEG GvIT-28</b>                |
| 187.1               | <b>IT-28</b>                         | 467.7 <sup>+2</sup> | <b>b<sub>7</sub>-H<sub>2</sub>O<sup>+2</sup></b> | 758.4 <sup>+2</sup> | <b>a<sub>10</sub><sup>-</sup>NH<sub>3</sub><sup>+2</sup></b> | 986.0 <sup>+2</sup>  | <b>b<sub>14</sub><sup>+2</sup>+H<sub>2</sub>O</b>            | 1508.7 | <b>y<sub>11</sub></b>                |
| 189.1 <sup>+2</sup> | <b>a<sub>2</sub><sup>+2</sup></b>    | 468.2               | <b>Gv-28</b>                                     | 766.4               | <b>b<sub>5</sub></b>                                         | 991.0 <sup>+2</sup>  | <b>y<sub>14</sub><sup>-</sup>H<sub>2</sub>O<sup>+2</sup></b> | 1515.7 | <b>uITFEG GvIT-H<sub>2</sub>O</b>    |
| 194.6 <sup>+2</sup> | $\text{b}_2\text{-NH}_3^{+2}$        | 468.2 <sup>+2</sup> | <b>b<sub>7</sub>-NH<sub>3</sub><sup>+2</sup></b> | 766.9 <sup>+2</sup> | <b>a<sub>10</sub><sup>+2</sup></b>                           | 991.4 <sup>+2</sup>  | <b>y<sub>14</sub><sup>-</sup>NH<sub>3</sub><sup>+2</sup></b> | 1515.7 | <b>a<sub>10</sub>-NH<sub>3</sub></b> |
| 197.1               | <b>IT-H<sub>2</sub>O</b>             | 473.2               | <b>uIT-H<sub>2</sub>O</b>                        | 767.3               | <b>GGvIT</b>                                                 | 991.5                | <b>b<sub>8</sub>-H<sub>2</sub>O</b>                          | 1520.7 | <b>ITFEGG vITFGS-28</b>              |
| 203.1 <sup>+2</sup> | <b>b<sub>2</sub><sup>+2</sup></b>    | 473.2               | <b>ITFE-H<sub>2</sub>O</b>                       | 767.3               | <b>EGGvI-28</b>                                              | 992.5                | <b>b<sub>8</sub>-NH<sub>3</sub></b>                          | 1530.7 | <b>ITFEGG vITFGS-H<sub>2</sub>O</b>  |
| 205.1               | <b>FG</b>                            | 473.3               | <b>a<sub>3</sub>-NH<sub>3</sub></b>              | 767.3               | <b>uITFE</b>                                                 | 1000.0 <sup>+2</sup> | <b>y<sub>14</sub><sup>+2</sup></b>                           | 1532.7 | <b>a<sub>10</sub></b>                |
| 215.1               | <b>IT</b>                            | 474.2               | <b>TFEGG-H<sub>2</sub>O</b>                      | 771.9 <sup>+2</sup> | <b>b<sub>10</sub><sup>-</sup>H<sub>2</sub>O<sup>+2</sup></b> | 1001.4               | <b>GvITFG S</b>                                              | 1533.7 | <b>uITFEG GvIT</b>                   |
| 216.1               | <b>EGG-28</b>                        | 476.7 <sup>+2</sup> | <b>b<sub>7</sub><sup>+2</sup></b>                | 772.4 <sup>+2</sup> | <b>b<sub>10</sub><sup>-</sup></b>                            | 1009.5               | <b>b<sub>8</sub></b>                                         | 1542.7 | <b>b<sub>10</sub>-H<sub>2</sub>O</b> |

|                        |                                                  |                     |                                                  |                     |                                                   |                      |                                       |        |                                      |
|------------------------|--------------------------------------------------|---------------------|--------------------------------------------------|---------------------|---------------------------------------------------|----------------------|---------------------------------------|--------|--------------------------------------|
|                        |                                                  |                     |                                                  |                     | $\text{NH}_3^{+2}$                                |                      |                                       |        |                                      |
| 221.1                  | <b>TF-28</b>                                     | 478.3               | <b>ITFGS-28</b>                                  | 772.4               | <b>vITF-28</b>                                    | 1015.4               | <b>TFEGG vl-28</b>                    | 1543.7 | <b>b<sub>10</sub>-NH<sub>3</sub></b> |
| 224.6 <sup>+2</sup>    | <b>y<sub>4</sub>-H<sub>2</sub>O<sup>+2</sup></b> | 482.7 <sup>+2</sup> | <b>a<sub>8</sub>-NH<sub>3</sub><sup>+2</sup></b> | 777.3               | <b>EGGvl-H<sub>2</sub>O</b>                       | 1015.4               | <b>FEGGvl T-28</b>                    | 1548.7 | <b>ITFEGG vITFGS</b>                 |
| 225.1 <sup>+2</sup>    | <b>y<sub>4</sub>-NH<sub>3</sub><sup>+2</sup></b> | 488.3               | <b>ITFGS-H<sub>2</sub>O</b>                      | 780.7 <sup>+2</sup> | <b>b<sub>10</sub><sup>+2</sup></b>                | 1015.4               | <b>EGGvIT F-28</b>                    | 1560.7 | <b>b<sub>10</sub></b>                |
| 226.1                  | <b>EGG-H<sub>2</sub>O</b>                        | 490.3               | <b>a<sub>3</sub></b>                             | 782.3               | <b>vITF-H<sub>2</sub>O</b>                        | 1015.4               | <b>ITFEGG v-28</b>                    | 1591.7 | <b>y<sub>12</sub>-H<sub>2</sub>O</b> |
| 231.1                  | <b>TF-H<sub>2</sub>O</b>                         | 491.2               | <b>uIT</b>                                       | 795.3               | <b>EGGvl</b>                                      | 1025.4               | <b>TFEGG vl-H<sub>2</sub>O</b>        | 1592.7 | <b>y<sub>12</sub>-NH<sub>3</sub></b> |
| 233.6 <sup>+2</sup>    | <b>y<sub>4</sub><sup>+2</sup></b>                | 491.3 <sup>+2</sup> | <b>a<sub>8</sub><sup>+2</sup></b>                | 796.4 <sup>+2</sup> | <b>y<sub>12</sub>-H<sub>2</sub>O<sup>+2</sup></b> | 1025.4               | <b>FEGGvl T-H<sub>2</sub>O</b>        | 1609.7 | <b>y<sub>12</sub></b>                |
| 237.1 <sup>+2</sup>    | <b>a<sub>3</sub>-NH<sub>3</sub><sup>+2</sup></b> | 491.3               | <b>ITFE</b>                                      | 796.4               | <b>uITFEG-28</b>                                  | 1025.4               | <b>ITFEGG v-H<sub>2</sub>O</b>        | 1616.7 | <b>a<sub>11</sub>-NH<sub>3</sub></b> |
| 244.1                  | <b>EGG</b>                                       | 492.2               | <b>TFEGG</b>                                     | 796.9 <sup>+2</sup> | <b>y<sub>12</sub>-NH<sub>3</sub><sup>+2</sup></b> | 1025.4               | <b>EGGvIT F-H<sub>2</sub>O</b>        | 1633.8 | <b>a<sub>11</sub></b>                |
| 244.1                  | <b>y<sub>2</sub>-H<sub>2</sub>O</b>              | 496.2               | <b>Gv</b>                                        | 800.4               | <b>vITF</b>                                       | 1030.5               | <b>GGvITF GS-28</b>                   | 1643.8 | <b>b<sub>11</sub>-H<sub>2</sub>O</b> |
| 245.1                  | <b>y<sub>2</sub>-NH<sub>3</sub></b>              | 496.2 <sup>+2</sup> | <b>b<sub>8</sub>-H<sub>2</sub>O<sup>+2</sup></b> | 801.3               | <b>FEGGv-28</b>                                   | 1040.4               | <b>GGvITF GS-H<sub>2</sub>O</b>       | 1644.7 | <b>b<sub>11</sub>-NH<sub>3</sub></b> |
| 245.7 <sup>+2</sup>    | <b>a<sub>3</sub><sup>+2</sup></b>                | 496.7 <sup>+2</sup> | <b>b<sub>8</sub>-NH<sub>3</sub><sup>+2</sup></b> | 805.4 <sup>+2</sup> | <b>y<sub>12</sub><sup>+2</sup></b>                | 1043.4               | <b>ITFEGG v</b>                       | 1652.7 | <b>uITFEG GvITF-28</b>               |
| 249.1                  | <b>TF</b>                                        | 501.3               | <b>b<sub>3</sub>-NH<sub>3</sub></b>              | 806.4               | <b>uITFEG-H<sub>2</sub>O</b>                      | 1043.4               | <b>EGGvIT F</b>                       | 1661.8 | <b>b<sub>11</sub></b>                |
| 249.1                  | <b>FE-28</b>                                     | 505.3 <sup>+2</sup> | <b>b<sub>8</sub><sup>+2</sup></b>                | 808.9 <sup>+2</sup> | <b>a<sub>11</sub>-NH<sub>3</sub><sup>+2</sup></b> | 1043.4               | <b>FEGGvl T</b>                       | 1662.7 | <b>uITFEG GvITF-H<sub>2</sub>O</b>   |
| 251.1314 <sup>+2</sup> | <b>b<sub>3</sub>-NH<sub>3</sub><sup>+2</sup></b> | 506.3               | <b>ITFGS</b>                                     | 811.3               | <b>FEGGv-H<sub>2</sub>O</b>                       | 1043.4               | <b>TFEGG vl</b>                       | 1680.7 | <b>uITFEG GvITF</b>                  |
| 259.1                  | <b>FE-H<sub>2</sub>O</b>                         | 518.3               | <b>b<sub>3</sub></b>                             | 817.4 <sup>+2</sup> | <b>a<sub>11</sub><sup>+2</sup></b>                | 1055.0 <sup>+2</sup> | <b>MH-H<sub>2</sub>O<sup>+2</sup></b> | 1704.8 | <b>y<sub>13</sub>-H<sub>2</sub>O</b> |
| 259.7 <sup>+2</sup>    | <b>b<sub>3</sub><sup>+2</sup></b>                | 520.3               | <b>ITFEG-28</b>                                  | 822.4 <sup>+2</sup> | <b>b<sub>11</sub>-H<sub>2</sub>O<sup>+2</sup></b> | 1055.5 <sup>+2</sup> | <b>MH-NH<sub>3</sub><sup>+2</sup></b> | 1705.8 | <b>y<sub>13</sub>-NH<sub>3</sub></b> |
| 262.2                  | <b>y<sub>2</sub></b>                             | 524.2               | <b>vl-28</b>                                     | 822.9 <sup>+2</sup> | <b>b<sub>11</sub>-NH<sub>3</sub><sup>+2</sup></b> | 1058.5               | <b>GGvITF GS</b>                      | 1709.8 | <b>uITFEG GvITFG-28</b>              |
| 264.1                  | <b>FGS-28</b>                                    | 525.2               | <b>GGv-28</b>                                    | 824.4               | <b>uITFEG</b>                                     | 1064.0 <sup>+2</sup> | <b>MH<sup>+2</sup></b>                | 1719.7 | <b>uITFEG GvITFG-H<sub>2</sub>O</b>  |
| 274.1                  | <b>FGS-H<sub>2</sub>O</b>                        | 530.3               | <b>ITFEG-H<sub>2</sub>O</b>                      | 829.3               | <b>FEGGv</b>                                      | 1072.5               | <b>EGGvIT FG-28</b>                   | 1722.8 | <b>y<sub>13</sub></b>                |
| 275.1 <sup>+2</sup>    | <b>y<sub>5</sub>-H<sub>2</sub>O<sup>+2</sup></b> | 548.3               | <b>ITFEG</b>                                     | 829.4               | <b>vITFG-28</b>                                   | 1082.5               | <b>EGGvIT FG-H<sub>2</sub>O</b>       | 1737.8 | <b>uITFEG GvITFG</b>                 |
| 275.6 <sup>+2</sup>    | <b>y<sub>5</sub>-NH<sub>3</sub><sup>+2</sup></b> | 549.3               | <b>y<sub>5</sub>-H<sub>2</sub>O</b>              | 829.4               | <b>GvITF-28</b>                                   | 1100.5               | <b>EGGvIT FG</b>                      | 1763.8 | <b>a<sub>12</sub>-NH<sub>3</sub></b> |
| 277.1                  | <b>FE</b>                                        | 550.3               | <b>y<sub>5</sub>-NH<sub>3</sub></b>              | 831.4 <sup>+2</sup> | <b>b<sub>11</sub><sup>+2</sup></b>                | 1100.5               | <b>y<sub>7</sub>-H<sub>2</sub>O</b>   | 1780.8 | <b>a<sub>12</sub></b>                |
| 278.1                  | <b>TFG-28</b>                                    | 550.8 <sup>+2</sup> | <b>y<sub>7</sub>-H<sub>2</sub>O<sup>+2</sup></b> | 839.4               | <b>vITFG-H<sub>2</sub>O</b>                       | 1101.5               | <b>y<sub>7</sub>-NH<sub>3</sub></b>   | 1790.8 | <b>b<sub>12</sub>-H<sub>2</sub>O</b> |
| 284.2 <sup>+2</sup>    | <b>y<sub>5</sub><sup>+2</sup></b>                | 551.3 <sup>+2</sup> | <b>y<sub>7</sub>-NH<sub>3</sub><sup>+2</sup></b> | 839.4               | <b>GvITF-H<sub>2</sub>O</b>                       | 1116.5               | <b>TFEGG vIT-28</b>                   | 1791.8 | <b>b<sub>12</sub>-NH<sub>3</sub></b> |

|                     |                                                  |                     |                                                  |                     |                                                                    |        |                                           |        |                                               |
|---------------------|--------------------------------------------------|---------------------|--------------------------------------------------|---------------------|--------------------------------------------------------------------|--------|-------------------------------------------|--------|-----------------------------------------------|
| 287.7 <sup>+2</sup> | <b>a<sub>4</sub>-NH<sub>3</sub><sup>+2</sup></b> | 552.2 <sup>+2</sup> | <b>vl</b>                                        | 850.4               | <b>a<sub>6</sub>-NH<sub>3</sub></b>                                | 1118.5 | <b>y<sub>7</sub></b>                      | 1796.8 | <b>uITFEG<br/>GvITFG<br/>S-28</b>             |
| 288.1               | <b>TFG-<br/>H<sub>2</sub>O</b>                   | 553.2               | <b>GGv</b>                                       | 852.9 <sup>+2</sup> | <b>y<sub>13</sub><sup>-</sup>-<br/>H<sub>2</sub>O<sup>+2</sup></b> | 1126.5 | <b>TFEGG<br/>vIT-H<sub>2</sub>O</b>       | 1806.8 | <b>uITFEG<br/>GvITFG<br/>S-H<sub>2</sub>O</b> |
| 292.1               | <b>FGS</b>                                       | 559.8 <sup>+2</sup> | <b>y<sub>7</sub><sup>+2</sup></b>                | 853.4 <sup>+2</sup> | <b>y<sub>13</sub><sup>-</sup>-<br/>NH<sub>3</sub><sup>+2</sup></b> | 1128.5 | <b>ITFEGG<br/>vl-28</b>                   | 1808.8 | <b>b<sub>12</sub></b>                         |
| 296.2 <sup>+2</sup> | <b>a<sub>4</sub><sup>+2</sup></b>                | 567.3               | <b>y<sub>5</sub></b>                             | 853.4               | <b>uITFEG<br/>G-28</b>                                             | 1138.5 | <b>ITFEGG<br/>vl-H<sub>2</sub>O</b>       | 1820.8 | <b>a<sub>13</sub>-NH<sub>3</sub></b>          |
| 301.2               | <b>y<sub>3</sub>-H<sub>2</sub>O</b>              | 574.3               | <b>a<sub>4</sub>-NH<sub>3</sub></b>              | 857.4               | <b>vITFG</b>                                                       | 1144.5 | <b>TFEGG<br/>vIT</b>                      | 1824.8 | <b>uITFEG<br/>GvITFG<br/>S</b>                |
| 301.2 <sup>+2</sup> | <b>b<sub>4</sub>-H<sub>2</sub>O<sup>+2</sup></b> | 577.3               | <b>ITFEGG<br/>-28</b>                            | 857.4               | <b>GvITF</b>                                                       | 1156.5 | <b>ITFEGG<br/>vl</b>                      | 1837.9 | <b>a<sub>13</sub></b>                         |
| 301.7 <sup>+2</sup> | <b>b<sub>4</sub>-NH<sub>3</sub><sup>+2</sup></b> | 579.3 <sup>+2</sup> | <b>y<sub>8</sub>-H<sub>2</sub>O<sup>+2</sup></b> | 861.9 <sup>+2</sup> | <b>y<sub>13</sub><sup>+2</sup></b>                                 | 1157.5 | <b>y<sub>8</sub>-H<sub>2</sub>O</b>       | 1847.8 | <b>b<sub>13</sub>-H<sub>2</sub>O</b>          |
| 302.1               | <b>y<sub>3</sub>-NH<sub>3</sub></b>              | 579.8 <sup>+2</sup> | <b>y<sub>8</sub>-NH<sub>3</sub><sup>+2</sup></b> | 863.4               | <b>uITFEG<br/>G-H<sub>2</sub>O</b>                                 | 1158.5 | <b>y<sub>8</sub>-NH<sub>3</sub></b>       | 1848.8 | <b>b<sub>13</sub>-NH<sub>3</sub></b>          |
| 306.1               | <b>TFG</b>                                       | 581.3               | <b>Gvl-28</b>                                    | 867.4               | <b>a<sub>6</sub></b>                                               | 1159.5 | <b>EGGvIT<br/>FGS-28</b>                  | 1865.9 | <b>b<sub>13</sub></b>                         |
| 306.1               | <b>FEG-28</b>                                    | 587.3               | <b>ITFEGG<br/>-H<sub>2</sub>O</b>                | 868.4               | <b>EGGvIT<br/>-28</b>                                              | 1162.5 | <b>FEGGvl<br/>TF-28</b>                   | 1883.9 | <b>b<sub>13</sub>+H<sub>2</sub>O</b>          |
| 310.2 <sup>+2</sup> | <b>b<sub>4</sub><sup>+2</sup></b>                | 588.3 <sup>+2</sup> | <b>y<sub>8</sub><sup>+2</sup></b>                | 877.4               | <b>b<sub>6</sub>-H<sub>2</sub>O</b>                                | 1169.5 | <b>EGGvIT<br/>FGS-<br/>H<sub>2</sub>O</b> | 1907.9 | <b>a<sub>14</sub>-NH<sub>3</sub></b>          |
| 316.1               | <b>FEG-<br/>H<sub>2</sub>O</b>                   | 591.3               | <b>a<sub>4</sub></b>                             | 878.4               | <b>EGGvIT<br/>-H<sub>2</sub>O</b>                                  | 1172.5 | <b>FEGGvl<br/>TF-H<sub>2</sub>O</b>       | 1924.9 | <b>a<sub>14</sub></b>                         |
| 319.2               | <b>y<sub>3</sub></b>                             | 601.3               | <b>b<sub>4</sub>-H<sub>2</sub>O</b>              | 878.4               | <b>b<sub>6</sub>-NH<sub>3</sub></b>                                | 1175.5 | <b>y<sub>8</sub></b>                      | 1934.9 | <b>b<sub>14</sub>-H<sub>2</sub>O</b>          |
| 331.7 <sup>+2</sup> | <b>y<sub>6</sub>-H<sub>2</sub>O<sup>+2</sup></b> | 602.3               | <b>b<sub>4</sub>-NH<sub>3</sub></b>              | 881.4               | <b>uITFEG<br/>G</b>                                                | 1187.5 | <b>EGGvIT<br/>FGS</b>                     | 1935.9 | <b>b<sub>14</sub>-NH<sub>3</sub></b>          |
| 332.2 <sup>+2</sup> | <b>y<sub>6</sub>-NH<sub>3</sub><sup>+2</sup></b> | 605.3               | <b>ITFEGG</b>                                    | 882.4 <sup>+2</sup> | <b>a<sub>12</sub><sup>-</sup>-<br/>NH<sub>3</sub><sup>+2</sup></b> | 1190.5 | <b>FEGGvl<br/>TF</b>                      | 1952.9 | <b>b<sub>14</sub></b>                         |
| 334.1               | <b>FEG</b>                                       | 607.8 <sup>+2</sup> | <b>y<sub>9</sub>-H<sub>2</sub>O<sup>+2</sup></b> | 886.4               | <b>GvITFG-<br/>28</b>                                              | 1214.6 | <b>y<sub>9</sub>-H<sub>2</sub>O</b>       | 1970.9 | <b>b<sub>14</sub>+H<sub>2</sub>O</b>          |
| 334.2               | <b>ITF-28</b>                                    | 608.3 <sup>+2</sup> | <b>y<sub>9</sub>-NH<sub>3</sub><sup>+2</sup></b> | 886.4               | <b>GGvITF-<br/>28</b>                                              | 1215.5 | <b>y<sub>9</sub>-NH<sub>3</sub></b>       | 1980.9 | <b>y<sub>14</sub>-H<sub>2</sub>O</b>          |
| 340.7 <sup>+2</sup> | <b>y<sub>6</sub><sup>+2</sup></b>                | 609.3               | <b>Gvl</b>                                       | 890.9 <sup>+2</sup> | <b>a<sub>12</sub><sup>+2</sup></b>                                 | 1219.5 | <b>FEGGvl<br/>TFG-28</b>                  | 1981.9 | <b>y<sub>14</sub>-NH<sub>3</sub></b>          |
| 344.2               | <b>ITF-H<sub>2</sub>O</b>                        | 610.3               | <b>uITF-28</b>                                   | 895.4               | <b>b<sub>6</sub></b>                                               | 1229.5 | <b>FEGGvl<br/>TFG-<br/>H<sub>2</sub>O</b> | 1998.9 | <b>y<sub>14</sub></b>                         |
| 350.2               | <b>TFE-28</b>                                    | 616.8 <sup>+2</sup> | <b>y<sub>9</sub><sup>+2</sup></b>                | 895.9 <sup>+2</sup> | <b>b<sub>12</sub><sup>-</sup>-<br/>H<sub>2</sub>O<sup>+2</sup></b> | 1229.6 | <b>ITFEGG<br/>vIT-28</b>                  | 2109.0 | <b>MH-H<sub>2</sub>O</b>                      |
| 360.2               | <b>TFE-<br/>H<sub>2</sub>O</b>                   | 619.3               | <b>b<sub>4</sub></b>                             | 896.4               | <b>EGGvIT</b>                                                      | 1232.6 | <b>y<sub>9</sub></b>                      | 2110.0 | <b>MH-NH<sub>3</sub></b>                      |
| 360.2               | <b>a<sub>2</sub>-NH<sub>3</sub></b>              | 620.3               | <b>uITF-<br/>H<sub>2</sub>O</b>                  | 896.4               | <b>GvITFG-<br/>H<sub>2</sub>O</b>                                  | 1239.6 | <b>ITFEGG<br/>vIT-H<sub>2</sub>O</b>      | 2127.0 | <b>MH</b>                                     |
| 361.2 <sup>+2</sup> | <b>a<sub>5</sub>-NH<sub>3</sub><sup>+2</sup></b> | 625.3               | <b>vIT-28</b>                                    | 896.4               | <b>GGvITF-<br/>H<sub>2</sub>O</b>                                  | 1247.5 | <b>FEGGvITFG</b>                          |        |                                               |
| 362.2               | <b>ul-28</b>                                     | 635.3               | <b>vIT-H<sub>2</sub>O</b>                        | 896.4 <sup>+2</sup> | <b>b<sub>12</sub><sup>-</sup>-<br/>NH<sub>3</sub><sup>+2</sup></b> | 1257.6 | <b>ITFEGG<br/>vIT</b>                     |        |                                               |
| 362.2               | <b>ITF</b>                                       | 638.3               | <b>GGvl-28</b>                                   | 902.4               | <b>TFEGG<br/>v-28</b>                                              | 1263.6 | <b>TFEGGvITF-28</b>                       |        |                                               |
| 363.2               | <b>FEGG-<br/>28</b>                              | 638.3               | <b>uITF</b>                                      | 904.9 <sup>+2</sup> | <b>b<sub>12</sub><sup>+2</sup></b>                                 | 1273.5 | <b>TFEGGvITF-H<sub>2</sub>O</b>           |        |                                               |

# AITNFTFNVGGLFDNK

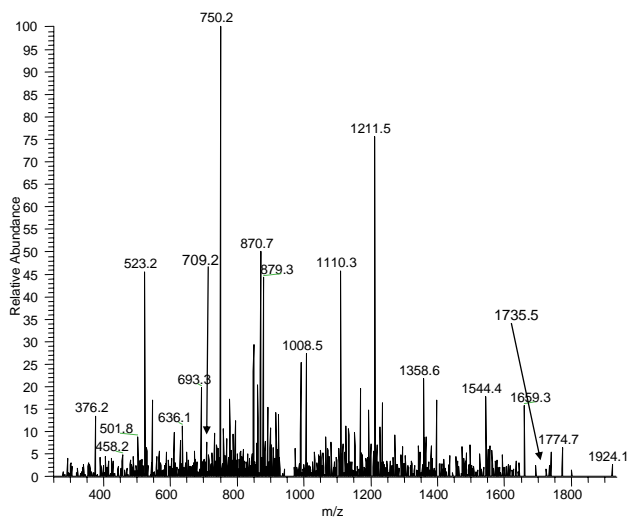

|                     |                                                  |                     |                                                  |                     |                                                        |                            |                                                        |        |                                            |
|---------------------|--------------------------------------------------|---------------------|--------------------------------------------------|---------------------|--------------------------------------------------------|----------------------------|--------------------------------------------------------|--------|--------------------------------------------|
| 65.6 <sup>+2</sup>  | <b>y<sub>1</sub>-NH<sub>3</sub><sup>+2</sup></b> | 361.2               | <b>FNV</b>                                       | 597.3 <sup>+2</sup> | <b>y<sub>11</sub>-H<sub>2</sub>O<sup>+2</sup></b>      | 868.412<br>3 <sup>+2</sup> | <b>y<sub>14</sub><sup>+2</sup></b>                     | 1195.6 | <b>TuFTFN<br/>VGGL-<br/>H<sub>2</sub>O</b> |
| 72.1                | <b>V</b>                                         | 363.2               | <b>TFN</b>                                       | 597.8 <sup>+2</sup> | <b>y<sub>11</sub>-<br/>NH<sub>3</sub><sup>+2</sup></b> | 869.4                      | <b>TuFTFN<br/>-H<sub>2</sub>O</b>                      | 1195.6 | <b>ITuFTF<br/>NVGG-<br/>H<sub>2</sub>O</b> |
| 74.1                | <b>T</b>                                         | 366.7 <sup>+2</sup> | <b>y<sub>7</sub>-H<sub>2</sub>O<sup>+2</sup></b> | 598.3               | <b>TuFT-28</b>                                         | 870.4                      | <b>TuFTFN<br/>-NH<sub>3</sub></b>                      | 1196.5 | <b>TuFTFN<br/>VGGL-<br/>NH<sub>3</sub></b> |
| 74.1 <sup>+2</sup>  | <b>y<sub>1</sub><sup>+2</sup></b>                | 367.2 <sup>+2</sup> | <b>y<sub>7</sub>-NH<sub>3</sub><sup>+2</sup></b> | 604.3               | <b>GGLFD<br/>N</b>                                     | 885.4                      | <b>uFTFN</b>                                           | 1196.5 | <b>ITuFTF<br/>NVGG-<br/>NH<sub>3</sub></b> |
| 84.1                | <b>K</b>                                         | 368.2               | <b>FTF-28</b>                                    | 606.3 <sup>+2</sup> | <b>y<sub>11</sub><sup>+2</sup></b>                     | 886.4                      | <b>ITuFTF</b>                                          | 1199.6 | <b>a<sub>10</sub></b>                      |
| 86.1                | <b>I</b>                                         | 375.2               | <b>GGLF</b>                                      | 608.3               | <b>TuFT-<br/>H<sub>2</sub>O</b>                        | 887.4                      | <b>TuFTFN</b>                                          | 1209.6 | <b>b<sub>10</sub>-H<sub>2</sub>O</b>       |
| 86.1                | <b>L</b>                                         | 375.7 <sup>+2</sup> | <b>y<sub>7</sub><sup>+2</sup></b>                | 609.3               | <b>FTFN</b>                                            | 914.4                      | <b>uFTFN<br/>G-28</b>                                  | 1210.6 | <b>b<sub>10</sub>-NH<sub>3</sub></b>       |
| 87.1                | <b>GG-28</b>                                     | 376.2               | <b>y<sub>3</sub></b>                             | 610.3               | <b>ITuF-28</b>                                         | 915.949<br>1 <sup>+2</sup> | <b>y<sub>15</sub>-<br/>H<sub>2</sub>O<sup>+2</sup></b> | 1211.6 | <b>y<sub>11</sub></b>                      |
| 87.1                | <b>N</b>                                         | 376.2               | <b>LFD</b>                                       | 618.3               | <b>y<sub>5</sub>-H<sub>2</sub>O</b>                    | 916.441<br>1 <sup>+2</sup> | <b>y<sub>15</sub>-<br/>NH<sub>3</sub><sup>+2</sup></b> | 1212.6 | <b>FTFN<br/>GGLFD<br/>N</b>                |
| 88.0                | <b>D</b>                                         | 377.1               | <b>FDN</b>                                       | 619.3               | <b>y<sub>5</sub>-NH<sub>3</sub></b>                    | 923.5                      | <b>TFNVG<br/>GLFD-<br/>28</b>                          | 1213.6 | <b>TuFTFN<br/>VGGL</b>                     |
| 101.1               | <b>K</b>                                         | 378.2               | <b>Tu</b>                                        | 620.3               | <b>ITuF-<br/>H<sub>2</sub>O</b>                        | 924.4                      | <b>uFTFN<br/>G-H<sub>2</sub>O</b>                      | 1213.6 | <b>ITuFTF<br/>NVGG</b>                     |
| 115.1               | <b>GG</b>                                        | 378.2               | <b>FTF-<br/>H<sub>2</sub>O</b>                   | 626.3               | <b>TuFT</b>                                            | 924.954<br>3 <sup>+2</sup> | <b>y<sub>15</sub><sup>+2</sup></b>                     | 1227.6 | <b>b<sub>10</sub></b>                      |
| 120.1               | <b>F</b>                                         | 390.2               | <b>FNVG-<br/>28</b>                              | 636.3               | <b>y<sub>5</sub></b>                                   | 925.4                      | <b>uFTFN<br/>G-NH<sub>3</sub></b>                      | 1231.6 | <b>uFTFN<br/>GGLF-<br/>28</b>              |
| 122.6 <sup>+2</sup> | <b>y<sub>2</sub>-NH<sub>3</sub><sup>+2</sup></b> | 396.2               | <b>uF-28</b>                                     | 638.3               | <b>ITuF</b>                                            | 929.5                      | <b>a<sub>7</sub></b>                                   | 1239.6 | <b>a<sub>11</sub>-NH<sub>3</sub></b>       |



|                     |                                                  |                     |                                                  |                     |                                                        |                            |                                            |        |                                             |
|---------------------|--------------------------------------------------|---------------------|--------------------------------------------------|---------------------|--------------------------------------------------------|----------------------------|--------------------------------------------|--------|---------------------------------------------|
| 126.1               | <b>K</b>                                         | 396.2               | <b>FTF</b>                                       | 638.3               | <b>FTFNV<br/>G-28</b>                                  | 933.4                      | <b>TFNVG<br/>GLFD-<br/>H<sub>2</sub>O</b>  | 1241.6 | <b>uFTFNV<br/>GGLF-<br/>H<sub>2</sub>O</b>  |
| 129.1               | <b>VG-28</b>                                     | 401.2               | <b>FNVG-<br/>NH<sub>3</sub></b>                  | 644.3               | <b>uFTF-28</b>                                         | 934.4                      | <b>TFNVG<br/>GLFD-<br/>NH<sub>3</sub></b>  | 1242.6 | <b>uFTFNV<br/>GGLF-<br/>NH<sub>3</sub></b>  |
| 129.1               | <b>K</b>                                         | 405.2               | <b>GLFD-<br/>28</b>                              | 648.3               | <b>FTFNV<br/>G-H<sub>2</sub>O</b>                      | 936.5                      | <b>FNVGG<br/>LFDN-<br/>28</b>              | 1256.6 | <b>a<sub>11</sub></b>                       |
| 130.1               | <b>y<sub>1</sub>-NH<sub>3</sub></b>              | 413.3               | <b>NVGGL-<br/>28</b>                             | 649.3               | <b>FTFNV<br/>G-NH<sub>3</sub></b>                      | 939.4                      | <b>b<sub>7</sub>-H<sub>2</sub>O</b>        | 1259.6 | <b>uFTFNV<br/>GGLF</b>                      |
| 131.1 <sup>+2</sup> | <b>y<sub>2</sub><sup>+2</sup></b>                | 415.2               | <b>GLFD-<br/>H<sub>2</sub>O</b>                  | 654.3               | <b>uFTF-<br/>H<sub>2</sub>O</b>                        | 942.4                      | <b>uFTFNV<br/>G</b>                        | 1266.6 | <b>b<sub>11</sub>-H<sub>2</sub>O</b>        |
| 143.1               | <b>GL-28</b>                                     | 416.2 <sup>+2</sup> | <b>y<sub>8</sub>-H<sub>2</sub>O<sup>+2</sup></b> | 661.4               | <b>TFNVG<br/>GL-28</b>                                 | 945.5                      | <b>y<sub>9</sub>-H<sub>2</sub>O</b>        | 1267.6 | <b>b<sub>11</sub>-NH<sub>3</sub></b>        |
| 147.1               | <b>y<sub>1</sub></b>                             | 416.7 <sup>+2</sup> | <b>y<sub>8</sub>-NH<sub>3</sub><sup>+2</sup></b> | 666.3               | <b>FTFNV<br/>G</b>                                     | 946.4                      | <b>FNVGG<br/>LFDN-<br/>H<sub>2</sub>O</b>  | 1284.6 | <b>b<sub>11</sub></b>                       |
| 157.1               | <b>VG</b>                                        | 418.2               | <b>FNVG</b>                                      | 670.8 <sup>+2</sup> | <b>y<sub>12</sub>-<br/>H<sub>2</sub>O<sup>+2</sup></b> | 946.5                      | <b>y<sub>9</sub>-NH<sub>3</sub></b>        | 1298.7 | <b>ITuFTF<br/>NVGGL-<br/>28</b>             |
| 157.1               | <b>a<sub>2</sub></b>                             | 424.2               | <b>uF</b>                                        | 671.3 <sup>+2</sup> | <b>y<sub>12</sub>-<br/>NH<sub>3</sub><sup>+2</sup></b> | 947.4                      | <b>FNVGG<br/>LFDN-<br/>NH<sub>3</sub></b>  | 1308.6 | <b>ITuFTF<br/>NVGGL-<br/>H<sub>2</sub>O</b> |
| 171.1               | <b>GL</b>                                        | 424.2               | <b>NVGGL-<br/>NH<sub>3</sub></b>                 | 671.4               | <b>TFNVG<br/>GL-H<sub>2</sub>O</b>                     | 951.5                      | <b>TFNVG<br/>GLFD</b>                      | 1309.6 | <b>ITuFTF<br/>NVGGL-<br/>NH<sub>3</sub></b> |
| 179.6 <sup>+2</sup> | <b>y<sub>3</sub>-H<sub>2</sub>O<sup>+2</sup></b> | 425.2 <sup>+2</sup> | <b>y<sub>8</sub><sup>+2</sup></b>                | 672.3               | <b>uFTF</b>                                            | 951.467<br>6 <sup>+2</sup> | <b>MH-<br/>H<sub>2</sub>O<sup>+2</sup></b> | 1326.7 | <b>ITuFTF<br/>NVGGL</b>                     |
| 180.1 <sup>+2</sup> | <b>y<sub>3</sub>-NH<sub>3</sub><sup>+2</sup></b> | 433.2               | <b>GLFD</b>                                      | 672.3               | <b>TFNVG<br/>GL-NH<sub>3</sub></b>                     | 951.959<br>6 <sup>+2</sup> | <b>MH-<br/>NH<sub>3</sub><sup>+2</sup></b> | 1332.6 | <b>TuFTFN<br/>VGGLF-<br/>28</b>             |
| 185.1               | <b>b<sub>2</sub></b>                             | 434.2               | <b>TFNV-<br/>28</b>                              | 675.3               | <b>VGGLF<br/>DN-28</b>                                 | 955.5                      | <b>FTFNV<br/>GGLF-<br/>28</b>              | 1340.7 | <b>y<sub>12</sub>-H<sub>2</sub>O</b>        |
| 186.1               | <b>VGG-28</b>                                    | 441.2               | <b>NVGGL</b>                                     | 675.3               | <b>NVGGL<br/>FD-28</b>                                 | 957.5                      | <b>b<sub>7</sub></b>                       | 1341.6 | <b>y<sub>12</sub>-NH<sub>3</sub></b>        |
| 186.1               | <b>NV-28</b>                                     | 444.2               | <b>TFNV-<br/>H<sub>2</sub>O</b>                  | 675.3               | <b>y<sub>6</sub>-H<sub>2</sub>O</b>                    | 958.5                      | <b>TuFTFN<br/>V-28</b>                     | 1342.6 | <b>TuFTFN<br/>VGGLF-<br/>H<sub>2</sub>O</b> |
| 187.1               | <b>IT-28</b>                                     | 445.2               | <b>TFNV-<br/>NH<sub>3</sub></b>                  | 676.3               | <b>y<sub>6</sub>-NH<sub>3</sub></b>                    | 960.472<br>9 <sup>+2</sup> | <b>MH<sup>+2</sup></b>                     | 1343.6 | <b>TuFTFN<br/>VGGLF-<br/>NH<sub>3</sub></b> |
| 188.6 <sup>+2</sup> | <b>y<sub>3</sub><sup>+2</sup></b>                | 446.3               | <b>VGGLF-<br/>28</b>                             | 679.8 <sup>2+</sup> | <b>y<sub>12</sub><sup>+2</sup></b>                     | 963.5                      | <b>y<sub>9</sub></b>                       | 1346.6 | <b>uFTFNV<br/>GGLFD-<br/>28</b>             |
| 197.1               | <b>NV-NH<sub>3</sub></b>                         | 447.2               | <b>FNVGG-<br/>28</b>                             | 681.3               | <b>a<sub>5</sub></b>                                   | 964.5                      | <b>FNVGG<br/>LFDN</b>                      | 1352.7 | <b>a<sub>12</sub>-NH<sub>3</sub></b>        |
| 197.1               | <b>IT-H<sub>2</sub>O</b>                         | 458.2               | <b>FNVGG-<br/>NH<sub>3</sub></b>                 | 685.3               | <b>NVGGL<br/>FD-H<sub>2</sub>O</b>                     | 965.5                      | <b>FTFNV<br/>GGLF-<br/>H<sub>2</sub>O</b>  | 1356.6 | <b>uFTFNV<br/>GGLFD-<br/>H<sub>2</sub>O</b> |
| 200.1               | <b>GGL-28</b>                                    | 462.2               | <b>GGLFD-<br/>28</b>                             | 685.3               | <b>VGGLF<br/>DN-H<sub>2</sub>O</b>                     | 966.5                      | <b>FTFNV<br/>GGLF-<br/>NH<sub>3</sub></b>  | 1357.6 | <b>uFTFNV<br/>GGLFD-<br/>NH<sub>3</sub></b> |
| 202.1               | <b>DN-28</b>                                     | 462.2               | <b>LFDN-<br/>28</b>                              | 686.3               | <b>NVGGL<br/>FD-NH<sub>3</sub></b>                     | 968.4                      | <b>TuFTFN<br/>V-H<sub>2</sub>O</b>         | 1358.7 | <b>y<sub>12</sub></b>                       |

|       |                                     |                     |                                                  |       |                                     |        |                                     |        |                                      |
|-------|-------------------------------------|---------------------|--------------------------------------------------|-------|-------------------------------------|--------|-------------------------------------|--------|--------------------------------------|
| 212.1 | <b>DN-H<sub>2</sub>O</b>            | 462.2               | <b>TFNV</b>                                      | 686.3 | <b>VGGLF DN-NH<sub>3</sub></b>      | 969.4  | <b>TuFTFN V-NH<sub>3</sub></b>      | 1360.6 | <b>TuFTFN VGGLF</b>                  |
| 213.1 | <b>DN-NH<sub>3</sub></b>            | 463.2               | <b>ITu-28</b>                                    | 689.4 | <b>TFNVG GL</b>                     | 971.4  | <b>uFTFNV GG-28</b>                 | 1369.7 | <b>a<sub>12</sub></b>                |
| 214.1 | <b>VGG</b>                          | 472.2               | <b>GGLFD-H<sub>2</sub>O</b>                      | 691.3 | <b>b<sub>5</sub>-H<sub>2</sub>O</b> | 972.5  | <b>ITuFTF N-28</b>                  | 1374.6 | <b>uFTFNV GGLFD</b>                  |
| 214.1 | <b>NV</b>                           | 472.2               | <b>LFDN-H<sub>2</sub>O</b>                       | 693.4 | <b>y<sub>6</sub></b>                | 981.4  | <b>uFTFNV GG-H<sub>2</sub>O</b>     | 1379.7 | <b>b<sub>12</sub>-H<sub>2</sub>O</b> |
| 215.1 | <b>IT</b>                           | 473.2               | <b>LFDN-NH<sub>3</sub></b>                       | 695.4 | <b>FTFNV GG-28</b>                  | 982.4  | <b>uFTFNV GG-NH<sub>3</sub></b>     | 1380.7 | <b>b<sub>12</sub>-NH<sub>3</sub></b> |
| 221.1 | <b>TF-28</b>                        | 473.2               | <b>ITu-H<sub>2</sub>O</b>                        | 703.3 | <b>NVGGL FD</b>                     | 982.5  | <b>ITuFTF N-H<sub>2</sub>O</b>      | 1397.7 | <b>b<sub>12</sub></b>                |
| 221.1 | <b>FT-28</b>                        | 473.2 <sup>+2</sup> | <b>y<sub>9</sub>-H<sub>2</sub>O<sup>+2</sup></b> | 703.3 | <b>VGGLF DN</b>                     | 983.4  | <b>ITuFTF N-NH<sub>3</sub></b>      | 1445.7 | <b>ITuFTF NVGGL F-28</b>             |
| 228.1 | <b>GGL</b>                          | 473.7 <sup>+2</sup> | <b>y<sub>9</sub>-NH<sub>3</sub><sup>+2</sup></b> | 705.3 | <b>FTFNV GG-H<sub>2</sub>O</b>      | 983.5  | <b>FTFNV GGLF</b>                   | 1447.7 | <b>TuFTFN VGGLF D-28</b>             |
| 230.1 | <b>DN</b>                           | 474.3               | <b>VGGLF</b>                                     | 706.3 | <b>FTFNV GG-NH<sub>3</sub></b>      | 986.4  | <b>TuFTFN V</b>                     | 1455.7 | <b>ITuFTF NVGGL F-H<sub>2</sub>O</b> |
| 231.1 | <b>TF-H<sub>2</sub>O</b>            | 475.2               | <b>FNVGG</b>                                     | 707.4 | <b>FNVGG LF-28</b>                  | 999.4  | <b>uFTFNV GG</b>                    | 1456.7 | <b>ITuFTF NVGGL F-NH<sub>3</sub></b> |
| 231.1 | <b>FT-H<sub>2</sub>O</b>            | 482.2               | <b>FTFN-28</b>                                   | 709.3 | <b>b<sub>5</sub></b>                | 1000.5 | <b>ITuFTF N</b>                     | 1457.7 | <b>TuFTFN VGGLF D-H<sub>2</sub>O</b> |
| 233.2 | <b>LF-28</b>                        | 482.3 <sup>+2</sup> | <b>y<sub>9</sub><sup>+2</sup></b>                | 711.4 | <b>ITuFT-28</b>                     | 1015.5 | <b>TuFTFN VG-28</b>                 | 1458.6 | <b>TuFTFN VGGLF D-NH<sub>3</sub></b> |
| 234.1 | <b>FN-28</b>                        | 490.2               | <b>GGLFD</b>                                     | 718.4 | <b>FNVGG LF-NH<sub>3</sub></b>      | 1025.5 | <b>TuFTFN VG-H<sub>2</sub>O</b>     | 1460.7 | <b>uFTFNV GGLFD N-28</b>             |
| 235.1 | <b>FD-28</b>                        | 490.2               | <b>LFDN</b>                                      | 721.3 | <b>ITuFT-H<sub>2</sub>O</b>         | 1026.4 | <b>TuFTFN VG-NH<sub>3</sub></b>     | 1470.7 | <b>uFTFNV GGLFD N-H<sub>2</sub>O</b> |
| 243.1 | <b>NVG-28</b>                       | 491.2               | <b>ITu</b>                                       | 723.3 | <b>FTFNV GG</b>                     | 1026.5 | <b>a<sub>8</sub>-NH<sub>3</sub></b> | 1471.6 | <b>uFTFNV GGLFD N-NH<sub>3</sub></b> |
| 244.1 | <b>y<sub>2</sub>-NH<sub>3</sub></b> | 491.3               | <b>TFNVG-28</b>                                  | 732.4 | <b>y<sub>7</sub>-H<sub>2</sub>O</b> | 1037.5 | <b>TFNVG GLFDN-28</b>               | 1473.7 | <b>ITuFTF NVGGL F</b>                |
| 245.1 | <b>FN-NH<sub>3</sub></b>            | 492.2               | <b>FTFN-H<sub>2</sub>O</b>                       | 733.4 | <b>y<sub>7</sub>-NH<sub>3</sub></b> | 1043.5 | <b>TuFTFN VG</b>                    | 1475.7 | <b>TuFTFN VGGLF D</b>                |
| 245.1 | <b>FD-H<sub>2</sub>O</b>            | 493.2               | <b>FTFN-NH<sub>3</sub></b>                       | 735.4 | <b>FNVGG LF</b>                     | 1043.5 | <b>a<sub>8</sub></b>                | 1488.7 | <b>uFTFNV GGLFD N</b>                |
| 249.1 | <b>TF</b>                           | 497.2               | <b>TuF-28</b>                                    | 739.4 | <b>ITuFT</b>                        | 1047.5 | <b>TFNVG GLFDN-H<sub>2</sub>O</b>   | 1499.7 | <b>a<sub>13</sub>-NH<sub>3</sub></b> |
| 249.1 | <b>FT</b>                           | 497.2               | <b>uFT-28</b>                                    | 745.3 | <b>TuFTF-28</b>                     | 1048.5 | <b>TFNVG GLFDN-NH<sub>3</sub></b>   | 1516.8 | <b>a<sub>13</sub></b>                |

|                     |                                                  |                     |                                                   |                     |                                                   |        |                                      |        |                                        |
|---------------------|--------------------------------------------------|---------------------|---------------------------------------------------|---------------------|---------------------------------------------------|--------|--------------------------------------|--------|----------------------------------------|
| 253.1 <sup>+2</sup> | <b>y<sub>4</sub>-H<sub>2</sub>O<sup>+2</sup></b> | 501.2               | <b>TFNVG-H<sub>2</sub>O</b>                       | 750.4               | <b>y<sub>7</sub></b>                              | 1053.5 | <b>b<sub>8</sub>-H<sub>2</sub>O</b>  | 1526.8 | <b>b<sub>13</sub>-H<sub>2</sub>O</b>   |
| 253.6 <sup>+2</sup> | <b>y<sub>4</sub>-NH<sub>3</sub><sup>+2</sup></b> | 502.2               | <b>TFNVG-NH<sub>3</sub></b>                       | 755.3               | <b>TuFTF-H<sub>2</sub>O</b>                       | 1054.5 | <b>b<sub>8</sub>-NH<sub>3</sub></b>  | 1527.7 | <b>b<sub>13</sub>-NH<sub>3</sub></b>   |
| 254.1               | <b>NVG-NH<sub>3</sub></b>                        | 505.2               | <b>y<sub>4</sub>-H<sub>2</sub>O</b>               | 758.3               | <b>uFTFN-28</b>                                   | 1065.5 | <b>TFNVG GLFDN</b>                   | 1544.8 | <b>b<sub>13</sub></b>                  |
| 258.2               | <b>a<sub>3</sub></b>                             | 506.2               | <b>y<sub>4</sub>-NH<sub>3</sub></b>               | 768.3               | <b>uFTFN-H<sub>2</sub>O</b>                       | 1070.5 | <b>FTFNV GGLFD-28</b>                | 1560.8 | <b>ITuFTF NVGGL FD-28</b>              |
| 261.2               | <b>y<sub>2</sub></b>                             | 507.2               | <b>TuF-H<sub>2</sub>O</b>                         | 769.3               | <b>uFTFN-NH<sub>3</sub></b>                       | 1071.5 | <b>b<sub>8</sub></b>                 | 1561.7 | <b>TuFTFN VGGLF DN-28</b>              |
| 261.2               | <b>LF</b>                                        | 507.2               | <b>uFT-H<sub>2</sub>O</b>                         | 773.3               | <b>TuFTF</b>                                      | 1071.5 | <b>ITuFTF NV-28</b>                  | 1570.7 | <b>ITuFTF NVGGL FD-H<sub>2</sub>O</b>  |
| 262.1               | <b>FN</b>                                        | 510.2               | <b>FTFN</b>                                       | 782.4               | <b>a<sub>6</sub></b>                              | 1072.5 | <b>TuFTFN VGG-28</b>                 | 1571.7 | <b>TuFTFN VGGLF DN-H<sub>2</sub>O</b>  |
| 262.1 <sup>+2</sup> | <b>y<sub>4</sub><sup>+2</sup></b>                | 519.3               | <b>GLFDN-28</b>                                   | 786.3               | <b>uFTFN</b>                                      | 1080.5 | <b>FTFNV GGLFD-H<sub>2</sub>O</b>    | 1571.7 | <b>ITuFTF NVGGL FD-NH<sub>3</sub></b>  |
| 263.1               | <b>FD</b>                                        | 519.3               | <b>TFNVG</b>                                      | 789.4               | <b>NVGGL FDN-28</b>                               | 1081.5 | <b>FTFNV GGLFD-NH<sub>3</sub></b>    | 1572.7 | <b>TuFTFN VGGLF DN-NH<sub>3</sub></b>  |
| 268.2               | <b>b<sub>3</sub>-H<sub>2</sub>O</b>              | 523.3               | <b>y<sub>4</sub></b>                              | 792.4               | <b>b<sub>6</sub>-H<sub>2</sub>O</b>               | 1081.5 | <b>ITuFTF NV-H<sub>2</sub>O</b>      | 1588.8 | <b>ITuFTF NVGGL FD</b>                 |
| 271.1               | <b>NVG</b>                                       | 525.2               | <b>TuF</b>                                        | 799.4               | <b>NVGGL FDN-H<sub>2</sub>O</b>                   | 1082.5 | <b>TuFTFN VGG-H<sub>2</sub>O</b>     | 1589.7 | <b>TuFTFN VGGLF DN</b>                 |
| 286.2               | <b>b<sub>3</sub></b>                             | 525.2               | <b>uFT</b>                                        | 800.4               | <b>NVGGL FDN-NH<sub>3</sub></b>                   | 1082.5 | <b>ITuFTF NV-NH<sub>3</sub></b>      | 1614.8 | <b>a<sub>14</sub>-NH<sub>3</sub></b>   |
| 290.2               | <b>GLF-28</b>                                    | 529.2               | <b>GLFDN-H<sub>2</sub>O</b>                       | 808.4               | <b>TFNVG GLF-28</b>                               | 1083.5 | <b>TuFTFN VGG-NH<sub>3</sub></b>     | 1616.8 | <b>y<sub>13</sub>-H<sub>2</sub>O</b>   |
| 299.2               | <b>VGGL-28</b>                                   | 530.2               | <b>GLFDN-NH<sub>3</sub></b>                       | 808.4               | <b>FTFNV GGL-28</b>                               | 1084.5 | <b>uFTFNV GGL-28</b>                 | 1617.7 | <b>y<sub>13</sub>-NH<sub>3</sub></b>   |
| 300.2               | <b>NVGG-28</b>                                   | 534.3               | <b>a<sub>4</sub></b>                              | 808.9 <sup>+2</sup> | <b>y<sub>13</sub>-H<sub>2</sub>O<sup>+2</sup></b> | 1092.5 | <b>y<sub>10</sub>-H<sub>2</sub>O</b> | 1631.8 | <b>a<sub>14</sub></b>                  |
| 309.7 <sup>+2</sup> | <b>y<sub>5</sub>-H<sub>2</sub>O<sup>+2</sup></b> | 544.3               | <b>b<sub>4</sub>-H<sub>2</sub>O</b>               | 809.4 <sup>+2</sup> | <b>y<sub>13</sub>-NH<sub>3</sub><sup>+2</sup></b> | 1093.5 | <b>y<sub>10</sub>-NH<sub>3</sub></b> | 1634.8 | <b>y<sub>13</sub></b>                  |
| 310.2 <sup>+2</sup> | <b>y<sub>5</sub>-NH<sub>3</sub><sup>+2</sup></b> | 546.8 <sup>+2</sup> | <b>y<sub>10</sub>-H<sub>2</sub>O<sup>+2</sup></b> | 810.4               | <b>b<sub>6</sub></b>                              | 1094.5 | <b>uFTFNV GGL-H<sub>2</sub>O</b>     | 1641.8 | <b>b<sub>14</sub>-H<sub>2</sub>O</b>   |
| 311.1               | <b>NVGG-NH<sub>3</sub></b>                       | 547.3               | <b>GLFDN</b>                                      | 817.4               | <b>NVGGL FDN</b>                                  | 1095.5 | <b>uFTFNV GGL-NH<sub>3</sub></b>     | 1642.8 | <b>b<sub>14</sub>-NH<sub>3</sub></b>   |
| 318.2               | <b>GLF</b>                                       | 547.3 <sup>+2</sup> | <b>y<sub>10</sub>-NH<sub>3</sub><sup>+2</sup></b> | 817.9 <sup>+2</sup> | <b>y<sub>13</sub><sup>+2</sup></b>                | 1098.5 | <b>FTFNV GGLFD</b>                   | 1659.8 | <b>b<sub>14</sub></b>                  |
| 318.7 <sup>+2</sup> | <b>y<sub>5</sub><sup>+2</sup></b>                | 548.3               | <b>TFNVG G-28</b>                                 | 818.4               | <b>TFNVG GLF-H<sub>2</sub>O</b>                   | 1099.5 | <b>ITuFTF NV</b>                     | 1674.8 | <b>ITuFTF NVGGL FDN-28</b>             |
| 327.2               | <b>VGGL</b>                                      | 555.8 <sup>+2</sup> | <b>y<sub>10</sub><sup>+2</sup></b>                | 818.4               | <b>FTFNV GGL-H<sub>2</sub>O</b>                   | 1100.5 | <b>TuFTFN VGG</b>                    | 1684.8 | <b>ITuFTF NVGGL FDN-H<sub>2</sub>O</b> |

|                     |                                                  |       |                                   |                     |                                                        |        |                                           |        |                                                     |
|---------------------|--------------------------------------------------|-------|-----------------------------------|---------------------|--------------------------------------------------------|--------|-------------------------------------------|--------|-----------------------------------------------------|
| 328.2               | <b>NVGG</b>                                      | 558.3 | <b>TFNVG<br/>G-H<sub>2</sub>O</b> | 819.4               | <b>FTFNV<br/>GGL-<br/>NH<sub>3</sub></b>               | 1110.6 | <b>y<sub>10</sub></b>                     | 1685.8 | <b>ITuFTF<br/>NVGGL<br/>FDN-<br/>NH<sub>3</sub></b> |
| 333.2               | <b>FNV-28</b>                                    | 559.3 | <b>TFNVG<br/>G-NH<sub>3</sub></b> | 819.4               | <b>TFNVG<br/>GLF-<br/>NH<sub>3</sub></b>               | 1112.5 | <b>uFTFNV<br/>GGL</b>                     | 1702.8 | <b>ITuFTF<br/>NVGGL<br/>FDN</b>                     |
| 335.2               | <b>TFN-28</b>                                    | 560.3 | <b>FNVGG<br/>L-28</b>             | 822.4               | <b>FNVGG<br/>LFD-28</b>                                | 1125.5 | <b>a<sub>9</sub>-NH<sub>3</sub></b>       | 1717.8 | <b>y<sub>14</sub>-H<sub>2</sub>O</b>                |
| 338.2 <sup>+2</sup> | <b>y<sub>6</sub>-H<sub>2</sub>O<sup>+2</sup></b> | 560.3 | <b>NVGGL<br/>F-28</b>             | 831.4               | <b>y<sub>8</sub>-H<sub>2</sub>O</b>                    | 1128.6 | <b>ITuFTF<br/>NVG-28</b>                  | 1718.8 | <b>y<sub>14</sub>-NH<sub>3</sub></b>                |
| 338.7 <sup>+2</sup> | <b>y<sub>6</sub>-NH<sub>3</sub><sup>+2</sup></b> | 561.3 | <b>VGGLF<br/>D-28</b>             | 832.4               | <b>FNVGG<br/>LFD-<br/>H<sub>2</sub>O</b>               | 1138.5 | <b>ITuFTF<br/>NVG-<br/>H<sub>2</sub>O</b> | 1728.8 | <b>a<sub>15</sub>-NH<sub>3</sub></b>                |
| 344.2               | <b>FNV-<br/>NH<sub>3</sub></b>                   | 562.3 | <b>b<sub>4</sub></b>              | 832.4               | <b>y<sub>8</sub>-NH<sub>3</sub></b>                    | 1139.5 | <b>ITuFTF<br/>NVG-<br/>NH<sub>3</sub></b> | 1735.8 | <b>y<sub>14</sub></b>                               |
| 345.2               | <b>TFN-<br/>H<sub>2</sub>O</b>                   | 571.3 | <b>VGGLF<br/>D-H<sub>2</sub>O</b> | 833.4               | <b>FNVGG<br/>LFD-<br/>NH<sub>3</sub></b>               | 1142.6 | <b>a<sub>9</sub></b>                      | 1745.8 | <b>a<sub>15</sub></b>                               |
| 346.1               | <b>TFN-<br/>NH<sub>3</sub></b>                   | 571.3 | <b>FNVGG<br/>L-NH<sub>3</sub></b> | 836.4               | <b>TFNVG<br/>GLF</b>                                   | 1152.6 | <b>b<sub>9</sub>-H<sub>2</sub>O</b>       | 1755.8 | <b>b<sub>15</sub>-H<sub>2</sub>O</b>                |
| 347.2 <sup>+2</sup> | <b>y<sub>6</sub><sup>+2</sup></b>                | 571.3 | <b>NVGGL<br/>F-NH<sub>3</sub></b> | 836.4               | <b>FTFNV<br/>GGL</b>                                   | 1153.5 | <b>b<sub>9</sub>-NH<sub>3</sub></b>       | 1756.8 | <b>b<sub>15</sub>-NH<sub>3</sub></b>                |
| 347.2               | <b>GGLF-<br/>28</b>                              | 576.3 | <b>GGLFD<br/>N-28</b>             | 849.4               | <b>y<sub>8</sub></b>                                   | 1156.6 | <b>ITuFTF<br/>NVG</b>                     | 1773.8 | <b>b<sub>15</sub></b>                               |
| 348.2               | <b>LFD-28</b>                                    | 576.3 | <b>TFNVG<br/>G</b>                | 850.4               | <b>FNVGG<br/>LFD</b>                                   | 1170.6 | <b>b<sub>9</sub></b>                      | 1830.9 | <b>y<sub>15</sub>-H<sub>2</sub>O</b>                |
| 349.2               | <b>FDN-28</b>                                    | 581.3 | <b>FTFNV-<br/>28</b>              | 857.4               | <b>uFTFNV<br/>-28</b>                                  | 1182.6 | <b>a<sub>10</sub>-NH<sub>3</sub></b>      | 1831.9 | <b>y<sub>15</sub>-NH<sub>3</sub></b>                |
| 350.2               | <b>Tu-28</b>                                     | 586.3 | <b>GGLFD<br/>N-H<sub>2</sub>O</b> | 858.4               | <b>ITuFTF-<br/>28</b>                                  | 1184.6 | <b>FTFNV<br/>GGLFD<br/>N-28</b>           | 1848.9 | <b>y<sub>15</sub></b>                               |
| 358.2               | <b>y<sub>3</sub>-H<sub>2</sub>O</b>              | 587.2 | <b>GGLFD<br/>N-NH<sub>3</sub></b> | 859.4               | <b>TuFTFN<br/>-28</b>                                  | 1185.6 | <b>TuFTFN<br/>VGGL-<br/>28</b>            | 1901.9 | <b>MH-H<sub>2</sub>O</b>                            |
| 358.2               | <b>LFD-<br/>H<sub>2</sub>O</b>                   | 588.3 | <b>FNVGG<br/>L</b>                | 859.4 <sup>+2</sup> | <b>y<sub>14</sub>-<br/>H<sub>2</sub>O<sup>+2</sup></b> | 1185.6 | <b>ITuFTF<br/>NVGG-<br/>28</b>            | 1902.9 | <b>MH-NH<sub>3</sub></b>                            |
| 359.1               | <b>FDN-<br/>H<sub>2</sub>O</b>                   | 588.3 | <b>NVGGL<br/>F</b>                | 859.9 <sup>+2</sup> | <b>y<sub>14</sub>-<br/>NH<sub>3</sub><sup>+2</sup></b> | 1193.6 | <b>y<sub>11</sub>-H<sub>2</sub>O</b>      | 1919.9 | <b>MH</b>                                           |
| 359.2               | <b>y<sub>3</sub>-NH<sub>3</sub></b>              | 589.3 | <b>VGGLF<br/>D</b>                | 867.4               | <b>uFTFNV<br/>-H<sub>2</sub>O</b>                      | 1194.6 | <b>FTFNVGGLFDN-<br/>H<sub>2</sub>O</b>    |        |                                                     |
| 360.1               | <b>FDN-<br/>NH<sub>3</sub></b>                   | 591.3 | <b>FTFNV-<br/>H<sub>2</sub>O</b>  | 868.4               | <b>uFTFNV<br/>-NH<sub>3</sub></b>                      | 1194.6 | <b>y<sub>11</sub>-NH<sub>3</sub></b>      |        |                                                     |
| 360.1               | <b>Tu-H<sub>2</sub>O</b>                         | 592.3 | <b>FTFNV-<br/>NH<sub>3</sub></b>  | 868.4               | <b>ITuFTF-<br/>H<sub>2</sub>O</b>                      | 1195.5 | <b>FTFNVGGLFDN-<br/>NH<sub>3</sub></b>    |        |                                                     |

# AITNFTFNVGGLFDNK MS/MS on C13 isotope

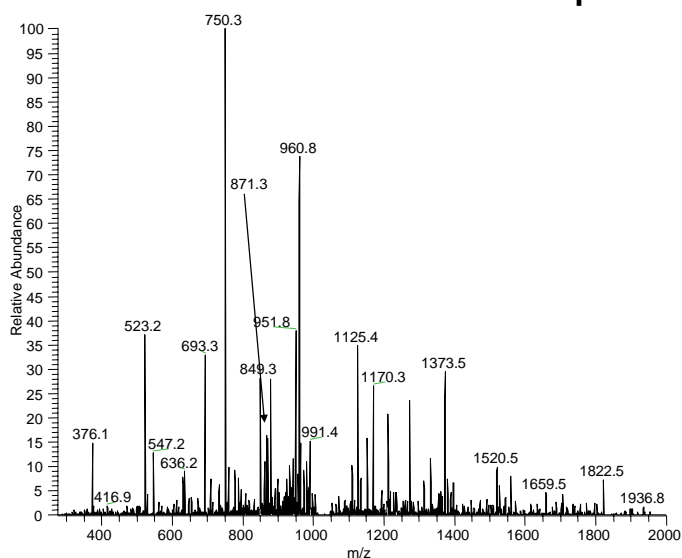

|                     |                                                  |                     |                                                  |                     |                                                        |                      |                                                        |        |                                            |
|---------------------|--------------------------------------------------|---------------------|--------------------------------------------------|---------------------|--------------------------------------------------------|----------------------|--------------------------------------------------------|--------|--------------------------------------------|
| 65.6 <sup>+2</sup>  | <b>y<sub>1</sub>-NH<sub>3</sub><sup>+2</sup></b> | 366.7 <sup>+2</sup> | <b>y<sub>7</sub>-H<sub>2</sub>O<sup>+2</sup></b> | 649.3               | <b>FTFNV<br/>G-NH<sub>3</sub></b>                      | 949.4 <sup>+2</sup>  | <b>y<sub>14</sub><sup>+2</sup></b>                     | 1341.6 | <b>y<sub>12</sub>-NH<sub>3</sub></b>       |
| 72.1                | <b>V</b>                                         | 367.2 <sup>+2</sup> | <b>y<sub>7</sub>-NH<sub>3</sub><sup>+2</sup></b> | 653.3               | <b>ITv</b>                                             | 951.5                | <b>TFNVG<br/>GLFD</b>                                  | 1344.6 | <b>a<sub>10</sub>-NH<sub>3</sub></b>       |
| 74.1                | <b>T</b>                                         | 368.2               | <b>FTF-28</b>                                    | 659.3               | <b>vFT-28</b>                                          | 954.4                | <b>b<sub>6</sub>-H<sub>2</sub>O</b>                    | 1347.6 | <b>TvFTFN<br/>VGGL-<br/>28</b>             |
| 74.1 <sup>+2</sup>  | <b>y<sub>1</sub><sup>+2</sup></b>                | 375.2               | <b>GGLF</b>                                      | 659.3               | <b>TvF-28</b>                                          | 955.5                | <b>FTFNV<br/>GGLF-<br/>28</b>                          | 1347.6 | <b>ITvFTF<br/>NVGG-<br/>28</b>             |
| 84.1                | <b>K</b>                                         | 375.7 <sup>+2</sup> | <b>y<sub>7</sub><sup>+2</sup></b>                | 661.4               | <b>TFNVG<br/>GL-28</b>                                 | 963.5                | <b>y<sub>9</sub></b>                                   | 1357.6 | <b>TvFTFN<br/>VGGL-<br/>H<sub>2</sub>O</b> |
| 86.1                | <b>I</b>                                         | 376.2               | <b>y<sub>3</sub></b>                             | 666.3               | <b>FTFNV<br/>G</b>                                     | 964.5                | <b>FNVGG<br/>LFDN</b>                                  | 1357.6 | <b>ITvFTF<br/>NVGG-<br/>H<sub>2</sub>O</b> |
| 86.1                | <b>L</b>                                         | 376.2               | <b>LFD</b>                                       | 669.3               | <b>vFT-<br/>H<sub>2</sub>O</b>                         | 965.5                | <b>FTFNV<br/>GGLF-<br/>H<sub>2</sub>O</b>              | 1358.6 | <b>TvFTFN<br/>VGGL-<br/>NH<sub>3</sub></b> |
| 87.1                | <b>GG-28</b>                                     | 377.1               | <b>FDN</b>                                       | 669.3               | <b>TvF-<br/>H<sub>2</sub>O</b>                         | 966.5                | <b>FTFNV<br/>GGLF-<br/>NH<sub>3</sub></b>              | 1358.6 | <b>ITvFTF<br/>NVGG-<br/>NH<sub>3</sub></b> |
| 87.1                | <b>N</b>                                         | 378.2               | <b>FTF-<br/>H<sub>2</sub>O</b>                   | 670.8 <sup>+2</sup> | <b>y<sub>12</sub>-<br/>H<sub>2</sub>O<sup>+2</sup></b> | 972.4                | <b>b<sub>6</sub></b>                                   | 1358.7 | <b>y<sub>12</sub></b>                      |
| 88.0                | <b>D</b>                                         | 390.2               | <b>FNVG-<br/>28</b>                              | 671.3 <sup>+2</sup> | <b>y<sub>12</sub>-<br/>NH<sub>3</sub><sup>+2</sup></b> | 983.5                | <b>FTFNV<br/>GGLF</b>                                  | 1361.6 | <b>a<sub>10</sub></b>                      |
| 101.1               | <b>K</b>                                         | 396.2               | <b>FTF</b>                                       | 671.4               | <b>TFNVG<br/>GL-H<sub>2</sub>O</b>                     | 997.0 <sup>+2</sup>  | <b>y<sub>15</sub>-<br/>H<sub>2</sub>O<sup>+2</sup></b> | 1371.6 | <b>b<sub>10</sub>-H<sub>2</sub>O</b>       |
| 115.1               | <b>GG</b>                                        | 401.2               | <b>FNVG-<br/>NH<sub>3</sub></b>                  | 672.3               | <b>TFNVG<br/>GL-NH<sub>3</sub></b>                     | 997.5 <sup>+2</sup>  | <b>y<sub>15</sub>-<br/>NH<sub>3</sub><sup>+2</sup></b> | 1372.6 | <b>b<sub>10</sub>-NH<sub>3</sub></b>       |
| 120.1               | <b>F</b>                                         | 405.2               | <b>GLFD-<br/>28</b>                              | 675.3               | <b>VGGLF<br/>DN-28</b>                                 | 1006.0 <sup>+2</sup> | <b>y<sub>15</sub><sup>+2</sup></b>                     | 1375.6 | <b>TvFTFN<br/>VGGL</b>                     |
| 122.6 <sup>+2</sup> | <b>y<sub>2</sub>-NH<sub>3</sub><sup>+2</sup></b> | 413.3               | <b>NVGG-<br/>28</b>                              | 675.3               | <b>NVGG-<br/>FD-28</b>                                 | 1019.5               | <b>vFTFNV<br/>-28</b>                                  | 1375.6 | <b>ITvFTF<br/>NVGG</b>                     |
| 126.1               | <b>K</b>                                         | 415.2               | <b>GLFD-<br/>H<sub>2</sub>O</b>                  | 675.3               | <b>y<sub>6</sub>-H<sub>2</sub>O</b>                    | 1020.5               | <b>ITvFTF-<br/>28</b>                                  | 1389.6 | <b>b<sub>10</sub></b>                      |

|                     |                                                  |                     |                                                  |                     |                                     |                      |                                       |        |                                      |
|---------------------|--------------------------------------------------|---------------------|--------------------------------------------------|---------------------|-------------------------------------|----------------------|---------------------------------------|--------|--------------------------------------|
| 129.1               | <b>VG-28</b>                                     | 416.2 <sup>+2</sup> | <b>y<sub>8</sub>-H<sub>2</sub>O<sup>+2</sup></b> | 676.3               | <b>y<sub>6</sub>-NH<sub>3</sub></b> | 1021.4               | <b>TvFTFN-28</b>                      | 1393.7 | <b>vFTFNV GGLF-28</b>                |
| 129.1               | <b>K</b>                                         | 416.7 <sup>+2</sup> | <b>y<sub>8</sub>-NH<sub>3</sub><sup>+2</sup></b> | 679.8 <sup>+2</sup> | <b>y<sub>12</sub><sup>+2</sup></b>  | 1029.4               | <b>vFTFNV-H<sub>2</sub>O</b>          | 1401.6 | <b>a<sub>11</sub>-NH<sub>3</sub></b> |
| 130.1               | <b>y<sub>1</sub>-NH<sub>3</sub></b>              | 418.2               | <b>FNVG</b>                                      | 685.3               | <b>NVGGL FD-H<sub>2</sub>O</b>      | 1030.4               | <b>vFTFNV-NH<sub>3</sub></b>          | 1403.6 | <b>vFTFNV GGLF-H<sub>2</sub>O</b>    |
| 131.1 <sup>+2</sup> | <b>y<sub>2</sub><sup>+2</sup></b>                | 424.2               | <b>NVGGL-NH<sub>3</sub></b>                      | 685.3               | <b>VGGLF DN-H<sub>2</sub>O</b>      | 1030.5               | <b>ITvFTF-H<sub>2</sub>O</b>          | 1404.6 | <b>vFTFNV GGLF-NH<sub>3</sub></b>    |
| 143.1               | <b>GL-28</b>                                     | 425.2 <sup>+2</sup> | <b>y<sub>8</sub><sup>+2</sup></b>                | 686.3               | <b>VGGLF DN-NH<sub>3</sub></b>      | 1031.4               | <b>TvFTFN-H<sub>2</sub>O</b>          | 1418.7 | <b>a<sub>11</sub></b>                |
| 147.1               | <b>y<sub>1</sub></b>                             | 433.2               | <b>GLFD</b>                                      | 686.3               | <b>NVGGL FD-NH<sub>3</sub></b>      | 1032.4               | <b>TvFTFN-NH<sub>3</sub></b>          | 1421.6 | <b>vFTFNV GGLF</b>                   |
| 157.1               | <b>VG</b>                                        | 434.2               | <b>TFNV-28</b>                                   | 687.3               | <b>TvF</b>                          | 1032.5 <sup>+2</sup> | <b>MH-H<sub>2</sub>O<sup>+2</sup></b> | 1428.7 | <b>b<sub>11</sub>-H<sub>2</sub>O</b> |
| 157.1               | <b>a<sub>2</sub></b>                             | 441.2               | <b>NVGGL</b>                                     | 687.3               | <b>vFT</b>                          | 1033.0 <sup>+2</sup> | <b>MH-NH<sub>3</sub><sup>+2</sup></b> | 1429.6 | <b>b<sub>11</sub>-NH<sub>3</sub></b> |
| 171.1               | <b>GL</b>                                        | 444.2               | <b>TFNV-H<sub>2</sub>O</b>                       | 689.4               | <b>TFNVG GL</b>                     | 1037.5               | <b>TFNVG GLFDN-28</b>                 | 1446.7 | <b>b<sub>11</sub></b>                |
| 179.6 <sup>+2</sup> | <b>y<sub>3</sub>-H<sub>2</sub>O<sup>+2</sup></b> | 445.2               | <b>TFNV-NH<sub>3</sub></b>                       | 693.4               | <b>y<sub>6</sub></b>                | 1041.5 <sup>+2</sup> | <b>MH<sup>+2</sup></b>                | 1460.7 | <b>ITvFTF NVGGL-28</b>               |
| 180.1 <sup>+2</sup> | <b>y<sub>3</sub>-NH<sub>3</sub><sup>+2</sup></b> | 446.3               | <b>VGGLF-28</b>                                  | 695.4               | <b>FTFNV GG-28</b>                  | 1047.5               | <b>vFTFNV</b>                         | 1470.7 | <b>ITvFTF NVGGL-H<sub>2</sub>O</b>   |
| 185.1               | <b>b<sub>2</sub></b>                             | 447.2               | <b>FNVGG-28</b>                                  | 696.3               | <b>a<sub>4</sub></b>                | 1047.5               | <b>TFNVG GLFDN-H<sub>2</sub>O</b>     | 1471.7 | <b>ITvFTF NVGGL-NH<sub>3</sub></b>   |
| 186.1               | <b>VGG-28</b>                                    | 458.2               | <b>FNVGG-NH<sub>3</sub></b>                      | 703.3               | <b>NVGGL FD</b>                     | 1048.5               | <b>ITvFTF</b>                         | 1488.7 | <b>ITvFTF NVGGL</b>                  |
| 186.1               | <b>NV-28</b>                                     | 462.2               | <b>GGLFD-28</b>                                  | 703.3               | <b>VGGLF DN</b>                     | 1048.5               | <b>TFNVG GLFDN-NH<sub>3</sub></b>     | 1494.7 | <b>TvFTFN VGGLF-28</b>               |
| 187.1               | <b>IT-28</b>                                     | 462.2               | <b>LFDN-28</b>                                   | 705.3               | <b>FTFNV GG-H<sub>2</sub>O</b>      | 1049.4               | <b>TvFTFN</b>                         | 1504.7 | <b>TvFTFN VGGLF-H<sub>2</sub>O</b>   |
| 188.6 <sup>+2</sup> | <b>y<sub>3</sub><sup>+2</sup></b>                | 462.2               | <b>TFNV</b>                                      | 706.3               | <b>b<sub>4</sub>-H<sub>2</sub>O</b> | 1065.5               | <b>TFNVG GLFDN</b>                    | 1505.7 | <b>TvFTFN VGGLF-NH<sub>3</sub></b>   |
| 197.1               | <b>NV-NH<sub>3</sub></b>                         | 472.2               | <b>GGLFD-H<sub>2</sub>O</b>                      | 706.3               | <b>FTFNV GG-NH<sub>3</sub></b>      | 1070.5               | <b>FTFNV GGLFD-28</b>                 | 1508.7 | <b>vFTFNV GGLFD-28</b>               |
| 197.1               | <b>IT-H<sub>2</sub>O</b>                         | 472.2               | <b>LFDN-H<sub>2</sub>O</b>                       | 707.4               | <b>FNVGG LF-28</b>                  | 1076.5               | <b>vFTFNV G-28</b>                    | 1514.7 | <b>a<sub>12</sub>-NH<sub>3</sub></b> |
| 200.1               | <b>GGL-28</b>                                    | 473.2               | <b>LFDN-NH<sub>3</sub></b>                       | 718.4               | <b>FNVGG LF-NH<sub>3</sub></b>      | 1080.5               | <b>FTFNV GGLFD-H<sub>2</sub>O</b>     | 1518.7 | <b>vFTFNV GGLFD-H<sub>2</sub>O</b>   |
| 202.1               | <b>DN-28</b>                                     | 473.2 <sup>+2</sup> | <b>y<sub>9</sub>-H<sub>2</sub>O<sup>+2</sup></b> | 723.3               | <b>FTFNV GG</b>                     | 1081.5               | <b>FTFNV GGLFD-NH<sub>3</sub></b>     | 1519.6 | <b>vFTFNV GGLFD-NH<sub>3</sub></b>   |
| 212.1               | <b>DN-H<sub>2</sub>O</b>                         | 473.7 <sup>+2</sup> | <b>y<sub>9</sub>-NH<sub>3</sub><sup>+2</sup></b> | 724.3               | <b>b<sub>4</sub></b>                | 1086.5               | <b>vFTFNV G-H<sub>2</sub>O</b>        | 1522.7 | <b>TvFTFN VGGLF</b>                  |

|                     |                                                  |                     |                                     |       |                                          |        |                                      |        |                                              |
|---------------------|--------------------------------------------------|---------------------|-------------------------------------|-------|------------------------------------------|--------|--------------------------------------|--------|----------------------------------------------|
| 213.1               | <b>DN-NH<sub>3</sub></b>                         | 474.3               | <b>VGGLF</b>                        | 732.4 | <b>y<sub>7</sub>-H<sub>2</sub>O</b>      | 1087.4 | <b>vFTFNV<br/>G-NH<sub>3</sub></b>   | 1531.8 | <b>a<sub>12</sub></b>                        |
| 214.1               | <b>VGG</b>                                       | 475.2               | <b>FNVGG</b>                        | 733.4 | <b>y<sub>7</sub>-NH<sub>3</sub></b>      | 1091.5 | <b>a<sub>7</sub></b>                 | 1536.7 | <b>vFTFNV<br/>GGLFD</b>                      |
| 214.1               | <b>NV</b>                                        | 482.2               | <b>FTFN-<br/>28</b>                 | 735.4 | <b>FNVGG<br/>LF</b>                      | 1092.5 | <b>y<sub>10</sub>-H<sub>2</sub>O</b> | 1541.7 | <b>b<sub>12</sub>-H<sub>2</sub>O</b>         |
| 215.1               | <b>IT</b>                                        | 482.3 <sup>+2</sup> | <b>y<sub>9</sub><sup>+2</sup></b>   | 750.4 | <b>y<sub>7</sub></b>                     | 1093.5 | <b>y<sub>10</sub>-NH<sub>3</sub></b> | 1542.7 | <b>b<sub>12</sub>-NH<sub>3</sub></b>         |
| 221.1               | <b>TF-28</b>                                     | 490.2               | <b>GGLFD</b>                        | 760.3 | <b>TvFT-28</b>                           | 1098.5 | <b>FTFNV<br/>GGLFD</b>               | 1559.7 | <b>b<sub>12</sub></b>                        |
| 221.1               | <b>FT-28</b>                                     | 490.2               | <b>LFDN</b>                         | 770.3 | <b>TvFT-<br/>H<sub>2</sub>O</b>          | 1101.5 | <b>b<sub>7</sub>-H<sub>2</sub>O</b>  | 1607.8 | <b>ITvFTF<br/>NVGGL<br/>F-28</b>             |
| 228.1               | <b>GGL</b>                                       | 491.3               | <b>TFNVG-<br/>28</b>                | 772.4 | <b>ITvF-28</b>                           | 1104.5 | <b>vFTFNV<br/>G</b>                  | 1609.7 | <b>TvFTFN<br/>VGGLF<br/>D-28</b>             |
| 230.1               | <b>DN</b>                                        | 492.2               | <b>FTFN-<br/>H<sub>2</sub>O</b>     | 782.3 | <b>ITvF-<br/>H<sub>2</sub>O</b>          | 1110.6 | <b>y<sub>10</sub></b>                | 1617.8 | <b>ITvFTF<br/>NVGGL<br/>F-H<sub>2</sub>O</b> |
| 231.1               | <b>TF-H<sub>2</sub>O</b>                         | 493.2               | <b>FTFN-<br/>NH<sub>3</sub></b>     | 788.3 | <b>TvFT</b>                              | 1119.5 | <b>b<sub>7</sub></b>                 | 1618.8 | <b>ITvFTF<br/>NVGGL<br/>F-NH<sub>3</sub></b> |
| 231.1               | <b>FT-H<sub>2</sub>O</b>                         | 501.2               | <b>TFNVG-<br/>H<sub>2</sub>O</b>    | 789.4 | <b>NVGGL<br/>FDN-28</b>                  | 1120.5 | <b>TvFTFN<br/>V-28</b>               | 1619.7 | <b>TvFTFN<br/>VGGLF<br/>D-H<sub>2</sub>O</b> |
| 233.2               | <b>LF-28</b>                                     | 502.2               | <b>TFNVG-<br/>NH<sub>3</sub></b>    | 799.4 | <b>NVGGL<br/>FDN-<br/>H<sub>2</sub>O</b> | 1130.5 | <b>TvFTFN<br/>V-H<sub>2</sub>O</b>   | 1620.7 | <b>TvFTFN<br/>VGGLF<br/>D-NH<sub>3</sub></b> |
| 234.1               | <b>FN-28</b>                                     | 505.2               | <b>y<sub>4</sub>-H<sub>2</sub>O</b> | 800.4 | <b>ITvF</b>                              | 1131.5 | <b>TvFTFN<br/>V-NH<sub>3</sub></b>   | 1622.7 | <b>vFTFNV<br/>GGLFD<br/>N-28</b>             |
| 235.1               | <b>FD-28</b>                                     | 506.2               | <b>y<sub>4</sub>-NH<sub>3</sub></b> | 800.4 | <b>NVGGL<br/>FDN-<br/>NH<sub>3</sub></b> | 1133.5 | <b>vFTFNV<br/>GG-28</b>              | 1632.7 | <b>vFTFNV<br/>GGLFD<br/>N-H<sub>2</sub>O</b> |
| 243.1               | <b>NVG-28</b>                                    | 510.2               | <b>FTFN</b>                         | 806.3 | <b>vFTF-28</b>                           | 1134.5 | <b>ITvFTF<br/>N-28</b>               | 1633.7 | <b>vFTFNV<br/>GGLFD<br/>N-NH<sub>3</sub></b> |
| 244.1               | <b>y<sub>2</sub>-NH<sub>3</sub></b>              | 512.2               | <b>Tv-28</b>                        | 808.4 | <b>TFNVG<br/>GLF-28</b>                  | 1143.5 | <b>vFTFNV<br/>GG-H<sub>2</sub>O</b>  | 1635.8 | <b>ITvFTF<br/>NVGGL<br/>F</b>                |
| 245.1               | <b>FN-NH<sub>3</sub></b>                         | 519.3               | <b>GLFDN-<br/>28</b>                | 808.4 | <b>FTFNV<br/>GGL-28</b>                  | 1144.5 | <b>vFTFNV<br/>GG-NH<sub>3</sub></b>  | 1637.7 | <b>TvFTFN<br/>VGGLF<br/>D</b>                |
| 245.1               | <b>FD-H<sub>2</sub>O</b>                         | 519.3               | <b>TFNVG</b>                        | 816.3 | <b>vFTF-<br/>H<sub>2</sub>O</b>          | 1144.5 | <b>ITvFTF<br/>N-H<sub>2</sub>O</b>   | 1650.7 | <b>vFTFNV<br/>GGLFD<br/>N</b>                |
| 249.1               | <b>TF</b>                                        | 522.2               | <b>Tv-H<sub>2</sub>O</b>            | 817.4 | <b>NVGGL<br/>FDN</b>                     | 1145.5 | <b>ITvFTF<br/>N-NH<sub>3</sub></b>   | 1661.8 | <b>a<sub>13</sub>-NH<sub>3</sub></b>         |
| 249.1               | <b>FT</b>                                        | 523.3               | <b>y<sub>4</sub></b>                | 818.4 | <b>TFNVG<br/>GLF-<br/>H<sub>2</sub>O</b> | 1148.5 | <b>TvFTFN<br/>V</b>                  | 1678.8 | <b>a<sub>13</sub></b>                        |
| 253.1 <sup>+2</sup> | <b>y<sub>4</sub>-H<sub>2</sub>O<sup>+2</sup></b> | 529.2               | <b>GLFDN-<br/>H<sub>2</sub>O</b>    | 818.4 | <b>FTFNV<br/>GGL-<br/>H<sub>2</sub>O</b> | 1161.5 | <b>vFTFNV<br/>GG</b>                 | 1688.8 | <b>b<sub>13</sub>-H<sub>2</sub>O</b>         |
| 253.6 <sup>+2</sup> | <b>y<sub>4</sub>-NH<sub>3</sub><sup>+2</sup></b> | 530.2               | <b>GLFDN-<br/>NH<sub>3</sub></b>    | 819.4 | <b>FTFNV<br/>GGL-<br/>NH<sub>3</sub></b> | 1162.5 | <b>ITvFTF<br/>N</b>                  | 1689.8 | <b>b<sub>13</sub>-NH<sub>3</sub></b>         |

|                     |                                                  |                     |                                                   |                      |                                                   |        |                                      |        |                                        |
|---------------------|--------------------------------------------------|---------------------|---------------------------------------------------|----------------------|---------------------------------------------------|--------|--------------------------------------|--------|----------------------------------------|
| 254.1               | <b>NVG-NH<sub>3</sub></b>                        | 540.2               | <b>Tv</b>                                         | 819.4                | <b>TFNVG GLF-NH<sub>3</sub></b>                   | 1177.5 | <b>TvFTFN VG-28</b>                  | 1706.8 | <b>b<sub>13</sub></b>                  |
| 258.2               | <b>a<sub>3</sub></b>                             | 546.8 <sup>+2</sup> | <b>y<sub>10</sub>-H<sub>2</sub>O<sup>+2</sup></b> | 822.4                | <b>FNVGG LFD-28</b>                               | 1184.6 | <b>FTFNV GGLFD N-28</b>              | 1722.8 | <b>ITvFTF NVGGL FD-28</b>              |
| 261.2               | <b>y<sub>2</sub></b>                             | 547.3               | <b>GLFDN</b>                                      | 831.4                | <b>y<sub>8</sub>-H<sub>2</sub>O</b>               | 1187.5 | <b>TvFTFN VG-H<sub>2</sub>O</b>      | 1723.8 | <b>TvFTFN VGGLF DN-28</b>              |
| 261.2               | <b>LF</b>                                        | 547.3 <sup>+2</sup> | <b>y<sub>10</sub>-NH<sub>3</sub><sup>+2</sup></b> | 832.4                | <b>FNVGG LFD-H<sub>2</sub>O</b>                   | 1188.5 | <b>TvFTFN VG-NH<sub>3</sub></b>      | 1732.8 | <b>ITvFTF NVGGL FD-H<sub>2</sub>O</b>  |
| 262.1               | <b>FN</b>                                        | 548.3               | <b>TFNVG G-28</b>                                 | 832.4                | <b>y<sub>8</sub>-NH<sub>3</sub></b>               | 1188.5 | <b>a<sub>8</sub>-NH<sub>3</sub></b>  | 1733.8 | <b>TvFTFN VGGLF DN-H<sub>2</sub>O</b>  |
| 262.1 <sup>+2</sup> | <b>y<sub>4</sub><sup>+2</sup></b>                | 555.8 <sup>+2</sup> | <b>y<sub>10</sub><sup>+2</sup></b>                | 833.4                | <b>FNVGG LFD-NH<sub>3</sub></b>                   | 1193.6 | <b>y<sub>11</sub>-H<sub>2</sub>O</b> | 1733.8 | <b>ITvFTF NVGGL FD-NH<sub>3</sub></b>  |
| 263.1               | <b>FD</b>                                        | 558.2               | <b>vF-28</b>                                      | 834.3                | <b>vFTF</b>                                       | 1194.6 | <b>FTFNV GGLFD N-H<sub>2</sub>O</b>  | 1734.7 | <b>TvFTFN VGGLF DN-NH<sub>3</sub></b>  |
| 268.2               | <b>b<sub>3</sub>-H<sub>2</sub>O</b>              | 558.3               | <b>TFNVG G-H<sub>2</sub>O</b>                     | 836.4                | <b>TFNVG GLF</b>                                  | 1194.6 | <b>y<sub>11</sub>-NH<sub>3</sub></b> | 1750.8 | <b>ITvFTF NVGGL FD</b>                 |
| 271.1               | <b>NVG</b>                                       | 559.3               | <b>TFNVG G-NH<sub>3</sub></b>                     | 836.4                | <b>FTFNV GGL</b>                                  | 1195.5 | <b>FTFNV GGLFD N-NH<sub>3</sub></b>  | 1751.8 | <b>TvFTFN VGGLF DN</b>                 |
| 286.2               | <b>b<sub>3</sub></b>                             | 560.3               | <b>FNVGG L-28</b>                                 | 843.4                | <b>a<sub>5</sub></b>                              | 1205.5 | <b>TvFTFN VG</b>                     | 1776.8 | <b>a<sub>14</sub>-NH<sub>3</sub></b>   |
| 290.2               | <b>GLF-28</b>                                    | 560.3               | <b>NVGGL F-28</b>                                 | 849.4                | <b>y<sub>8</sub></b>                              | 1205.6 | <b>a<sub>8</sub></b>                 | 1778.8 | <b>y<sub>13</sub>-H<sub>2</sub>O</b>   |
| 299.2               | <b>VGGL-28</b>                                   | 561.3               | <b>VGGLF D-28</b>                                 | 850.4                | <b>FNVGG LFD</b>                                  | 1211.6 | <b>y<sub>11</sub></b>                | 1779.8 | <b>y<sub>13</sub>-NH<sub>3</sub></b>   |
| 300.2               | <b>NVGG-28</b>                                   | 571.3               | <b>FNVGG L-NH<sub>3</sub></b>                     | 853.4                | <b>b<sub>5</sub>-H<sub>2</sub>O</b>               | 1212.6 | <b>FTFNV GGLFD N</b>                 | 1793.8 | <b>a<sub>14</sub></b>                  |
| 309.7 <sup>+2</sup> | <b>y<sub>5</sub>-H<sub>2</sub>O<sup>+2</sup></b> | 571.3               | <b>VGGLF D-H<sub>2</sub>O</b>                     | 871.4                | <b>b<sub>5</sub></b>                              | 1215.5 | <b>b<sub>8</sub>-H<sub>2</sub>O</b>  | 1796.8 | <b>y<sub>13</sub></b>                  |
| 310.2 <sup>+2</sup> | <b>y<sub>5</sub>-NH<sub>3</sub><sup>+2</sup></b> | 571.3               | <b>NVGGL F-NH<sub>3</sub></b>                     | 873.4                | <b>ITvFT-28</b>                                   | 1216.5 | <b>b<sub>8</sub>-NH<sub>3</sub></b>  | 1803.8 | <b>b<sub>14</sub>-H<sub>2</sub>O</b>   |
| 311.1               | <b>NVGG-NH<sub>3</sub></b>                       | 576.3               | <b>GGLFD N-28</b>                                 | 883.4                | <b>ITvFT-H<sub>2</sub>O</b>                       | 1233.6 | <b>b<sub>8</sub></b>                 | 1804.8 | <b>b<sub>14</sub>-NH<sub>3</sub></b>   |
| 318.2               | <b>GLF</b>                                       | 576.3               | <b>TFNVG G</b>                                    | 889.9 <sup>+2</sup>  | <b>y<sub>13</sub>-H<sub>2</sub>O<sup>+2</sup></b> | 1233.6 | <b>ITvFTF NV-28</b>                  | 1821.8 | <b>b<sub>14</sub></b>                  |
| 318.7 <sup>+2</sup> | <b>y<sub>5</sub><sup>+2</sup></b>                | 581.3               | <b>FTFNV-28</b>                                   | 890.40 <sup>+2</sup> | <b>y<sub>13</sub>-NH<sub>3</sub><sup>+2</sup></b> | 1234.5 | <b>TvFTFN VGG-28</b>                 | 1836.9 | <b>ITvFTF NVGGL FDN-28</b>             |
| 327.2               | <b>VGGL</b>                                      | 586.2               | <b>vF</b>                                         | 898.9 <sup>+2</sup>  | <b>y<sub>13</sub><sup>+2</sup></b>                | 1243.6 | <b>ITvFTF NV-H<sub>2</sub>O</b>      | 1846.8 | <b>ITvFTF NVGGL FDN-H<sub>2</sub>O</b> |
| 328.2               | <b>NVGG</b>                                      | 586.3               | <b>GGLFD N-H<sub>2</sub>O</b>                     | 901.4                | <b>ITvFT</b>                                      | 1244.5 | <b>TvFTFN VGG-H<sub>2</sub>O</b>     | 1847.8 | <b>ITvFTF NVGGL FDN-NH<sub>3</sub></b> |



|                     |                                                  |                     |                                                   |                     |                                                   |        |                                      |        |                                      |
|---------------------|--------------------------------------------------|---------------------|---------------------------------------------------|---------------------|---------------------------------------------------|--------|--------------------------------------|--------|--------------------------------------|
| 333.2               | <b>FNV-28</b>                                    | 587.2               | <b>GGLFD N-NH<sub>3</sub></b>                     | 907.4               | <b>TvFTF-28</b>                                   | 1244.6 | <b>ITvFTF NV-NH<sub>3</sub></b>      | 1864.8 | <b>ITvFTF NVGGL FDN</b>              |
| 335.2               | <b>TFN-28</b>                                    | 588.3               | <b>FNVGGL</b>                                     | 917.4               | <b>TvFTF-H<sub>2</sub>O</b>                       | 1245.5 | <b>TvFTFN VGG-NH<sub>3</sub></b>     | 1879.9 | <b>y<sub>14</sub>-H<sub>2</sub>O</b> |
| 338.2 <sup>+2</sup> | <b>y<sub>6</sub>-H<sub>2</sub>O<sup>+2</sup></b> | 588.3               | <b>NVGGL F</b>                                    | 920.4               | <b>vFTFN-28</b>                                   | 1246.6 | <b>vFTFN VGG-28</b>                  | 1880.8 | <b>y<sub>14</sub>-NH<sub>3</sub></b> |
| 338.7 <sup>+2</sup> | <b>y<sub>6</sub>-NH<sub>3</sub><sup>+2</sup></b> | 589.3               | <b>VGGLF D</b>                                    | 923.5               | <b>TFNVG GLFD-28</b>                              | 1256.6 | <b>vFTFN VGG-H<sub>2</sub>O</b>      | 1890.9 | <b>a<sub>15</sub>-NH<sub>3</sub></b> |
| 344.2               | <b>FNV-NH<sub>3</sub></b>                        | 591.3               | <b>FTFNV-H<sub>2</sub>O</b>                       | 930.4               | <b>vFTFN-H<sub>2</sub>O</b>                       | 1257.6 | <b>vFTFN VGG-NH<sub>3</sub></b>      | 1897.9 | <b>y<sub>14</sub></b>                |
| 345.2               | <b>TFN-H<sub>2</sub>O</b>                        | 592.3               | <b>FTFNV-NH<sub>3</sub></b>                       | 931.4               | <b>vFTFN-NH<sub>3</sub></b>                       | 1261.6 | <b>ITvFTF NV</b>                     | 1907.9 | <b>a<sub>15</sub></b>                |
| 346.1               | <b>TFN-NH<sub>3</sub></b>                        | 597.3 <sup>+2</sup> | <b>y<sub>11</sub>-H<sub>2</sub>O<sup>+2</sup></b> | 933.4               | <b>TFNVG GLFD-H<sub>2</sub>O</b>                  | 1262.5 | <b>TvFTFN VGG</b>                    | 1917.9 | <b>b<sub>15</sub>-H<sub>2</sub>O</b> |
| 347.2 <sup>+2</sup> | <b>y<sub>6</sub><sup>+2</sup></b>                | 597.8 <sup>+2</sup> | <b>y<sub>11</sub>-NH<sub>3</sub><sup>+2</sup></b> | 934.4               | <b>TFNVG GLFD-NH<sub>3</sub></b>                  | 1274.6 | <b>vFTFN VGG</b>                     | 1918.9 | <b>b<sub>15</sub>-NH<sub>3</sub></b> |
| 347.2               | <b>GGLF-28</b>                                   | 604.3               | <b>GGLFD N</b>                                    | 935.4               | <b>TvFTF</b>                                      | 1287.6 | <b>a<sub>9</sub>-NH<sub>3</sub></b>  | 1935.9 | <b>b<sub>15</sub></b>                |
| 348.2               | <b>LFD-28</b>                                    | 606.3 <sup>+2</sup> | <b>y<sub>11</sub><sup>+2</sup></b>                | 936.5               | <b>FNVGGL FDN-28</b>                              | 1290.6 | <b>ITvFTF NVG-28</b>                 | 1992.9 | <b>y<sub>15</sub>-H<sub>2</sub>O</b> |
| 349.2               | <b>FDN-28</b>                                    | 609.3               | <b>FTFN V</b>                                     | 940.4 <sup>+2</sup> | <b>y<sub>14</sub>-H<sub>2</sub>O<sup>+2</sup></b> | 1300.6 | <b>ITvFTF NVG-H<sub>2</sub>O</b>     | 1993.9 | <b>y<sub>15</sub>-NH<sub>3</sub></b> |
| 358.2               | <b>y<sub>3</sub>-H<sub>2</sub>O</b>              | 618.3               | <b>y<sub>5</sub>-H<sub>2</sub>O</b>               | 940.9 <sup>+2</sup> | <b>y<sub>14</sub>-NH<sub>3</sub><sup>+2</sup></b> | 1301.6 | <b>ITvFTF NVG-NH<sub>3</sub></b>     | 2011.0 | <b>y<sub>15</sub></b>                |
| 358.2               | <b>LFD-H<sub>2</sub>O</b>                        | 619.3               | <b>y<sub>5</sub>-NH<sub>3</sub></b>               | 944.4               | <b>a<sub>6</sub></b>                              | 1304.6 | <b>a<sub>9</sub></b>                 | 2064.0 | <b>MH-H<sub>2</sub>O</b>             |
| 359.1               | <b>FDN-H<sub>2</sub>O</b>                        | 625.3               | <b>ITv-28</b>                                     | 945.5               | <b>y<sub>9</sub>-H<sub>2</sub>O</b>               | 1314.6 | <b>b<sub>9</sub>-H<sub>2</sub>O</b>  | 2065.0 | <b>MH-NH<sub>3</sub></b>             |
| 359.2               | <b>y<sub>3</sub>-NH<sub>3</sub></b>              | 635.3               | <b>ITv-H<sub>2</sub>O</b>                         | 946.4               | <b>FNVGGL FDN-H<sub>2</sub>O</b>                  | 1315.6 | <b>b<sub>9</sub>-NH<sub>3</sub></b>  | 2082.0 | <b>MH</b>                            |
| 360.1               | <b>FDN-NH<sub>3</sub></b>                        | 636.3               | <b>y<sub>5</sub></b>                              | 946.5               | <b>y<sub>9</sub>-NH<sub>3</sub></b>               | 1318.6 | <b>ITvFTFN VGG</b>                   |        |                                      |
| 361.2               | <b>FNV</b>                                       | 638.3               | <b>FTFN V G-28</b>                                | 947.4               | <b>FNVGGL FDN-NH<sub>3</sub></b>                  | 1332.6 | <b>b<sub>9</sub></b>                 |        |                                      |
| 363.2               | <b>TFN</b>                                       | 648.3               | <b>FTFN V G-H<sub>2</sub>O</b>                    | 948.4               | <b>vFTFN</b>                                      | 1340.7 | <b>y<sub>12</sub>-H<sub>2</sub>O</b> |        |                                      |

# GNSNISI<sub>AK</sub>

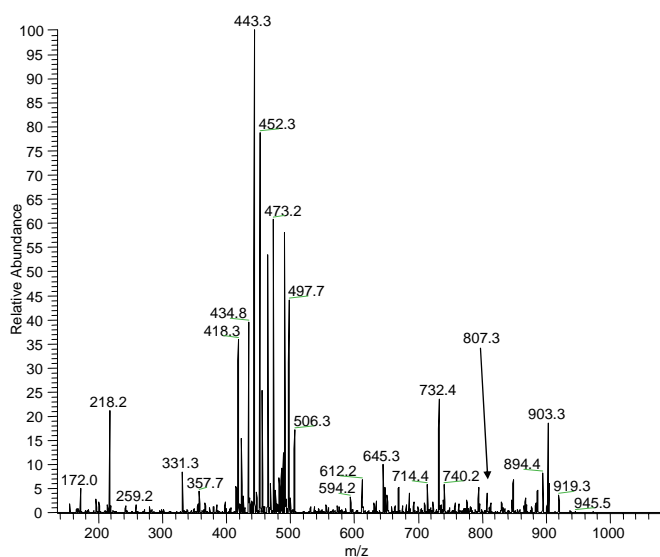

|                     |                                                  |                     |                                                  |                     |                                                  |       |                                     |       |                                     |
|---------------------|--------------------------------------------------|---------------------|--------------------------------------------------|---------------------|--------------------------------------------------|-------|-------------------------------------|-------|-------------------------------------|
| 60.0                | <b>S</b>                                         | 201.1               | <b>y<sub>2</sub>-NH<sub>3</sub></b>              | 404.2 <sup>+2</sup> | <b>y<sub>6</sub><sup>+2</sup></b>                | 563.3 | <b>NSul-28</b>                      | 774.4 | <b>NSulSI-NH<sub>3</sub></b>        |
| 65.6 <sup>+2</sup>  | <b>y<sub>1</sub>-NH<sub>3</sub><sup>+2</sup></b> | 202.1               | <b>NS</b>                                        | 418.3               | <b>y<sub>4</sub></b>                             | 564.3 | <b>SulS</b>                         | 789.4 | <b>y<sub>6</sub>-H<sub>2</sub>O</b> |
| 74.1 <sup>+2</sup>  | <b>y<sub>1</sub><sup>+2</sup></b>                | 209.6 <sup>+2</sup> | <b>y<sub>4</sub><sup>+2</sup></b>                | 438.7 <sup>+2</sup> | <b>y<sub>7</sub>-H<sub>2</sub>O<sup>+2</sup></b> | 572.3 | <b>ulSI-H<sub>2</sub>O</b>          | 790.4 | <b>y<sub>6</sub>-NH<sub>3</sub></b> |
| 84.1                | <b>K</b>                                         | 214.1               | <b>a<sub>3</sub>-NH<sub>3</sub></b>              | 439.2 <sup>+2</sup> | <b>y<sub>7</sub>-NH<sub>3</sub><sup>+2</sup></b> | 573.3 | <b>NSul-H<sub>2</sub>O</b>          | 791.4 | <b>NSulSI</b>                       |
| 86.1                | <b>I</b>                                         | 218.1               | <b>y<sub>2</sub></b>                             | 447.7 <sup>+2</sup> | <b>y<sub>7</sub><sup>+2</sup></b>                | 574.2 | <b>NSul-NH<sub>3</sub></b>          | 803.4 | <b>a<sub>7</sub>-NH<sub>3</sub></b> |
| 87.1                | <b>N</b>                                         | 231.1               | <b>a<sub>3</sub></b>                             | 449.2               | <b>ulS-28</b>                                    | 590.3 | <b>ulSI</b>                         | 807.4 | <b>y<sub>6</sub></b>                |
| 101.1 <sup>+2</sup> | <b>y<sub>2</sub>-NH<sub>3</sub><sup>+2</sup></b> | 241.1               | <b>b<sub>3</sub>-H<sub>2</sub>O</b>              | 449.2               | <b>Sul-28</b>                                    | 591.3 | <b>NSul</b>                         | 820.4 | <b>a<sub>7</sub></b>                |
| 101.1               | <b>K</b>                                         | 242.1               | <b>b<sub>3</sub>-NH<sub>3</sub></b>              | 450.2               | <b>NSu-28</b>                                    | 603.3 | <b>a<sub>5</sub>-NH<sub>3</sub></b> | 830.4 | <b>b<sub>7</sub>-H<sub>2</sub>O</b> |
| 109.6 <sup>+2</sup> | <b>y<sub>2</sub><sup>+2</sup></b>                | 244.2               | <b>SIA-28</b>                                    | 459.2               | <b>ulS-H<sub>2</sub>O</b>                        | 620.3 | <b>a<sub>5</sub></b>                | 831.4 | <b>b<sub>7</sub>-NH<sub>3</sub></b> |
| 126.1               | <b>K</b>                                         | 254.1               | <b>SIA-H<sub>2</sub>O</b>                        | 459.2               | <b>Sul-H<sub>2</sub>O</b>                        | 630.3 | <b>b<sub>5</sub>-H<sub>2</sub>O</b> | 834.4 | <b>NSulSIA-28</b>                   |
| 127.1               | <b>a<sub>2</sub>-NH<sub>3</sub></b>              | 257.2 <sup>+2</sup> | <b>y<sub>5</sub>-H<sub>2</sub>O<sup>+2</sup></b> | 460.2               | <b>NSu-H<sub>2</sub>O</b>                        | 631.3 | <b>b<sub>5</sub>-NH<sub>3</sub></b> | 844.4 | <b>NSulSIA-H<sub>2</sub>O</b>       |
| 129.1               | <b>K</b>                                         | 257.7 <sup>+2</sup> | <b>y<sub>5</sub>-NH<sub>3</sub><sup>+2</sup></b> | 461.2               | <b>NSu-NH<sub>3</sub></b>                        | 633.3 | <b>ulSIA-28</b>                     | 845.4 | <b>NSulSIA-NH<sub>3</sub></b>       |
| 130.1               | <b>y<sub>1</sub>-NH<sub>3</sub></b>              | 259.1               | <b>b<sub>3</sub></b>                             | 477.2               | <b>ulS</b>                                       | 643.3 | <b>ulSIA-H<sub>2</sub>O</b>         | 848.4 | <b>b<sub>7</sub></b>                |
| 144.1               | <b>a<sub>2</sub></b>                             | 266.2 <sup>+2</sup> | <b>y<sub>5</sub><sup>+2</sup></b>                | 477.2               | <b>Sul</b>                                       | 648.3 | <b>b<sub>5</sub></b>                | 862.4 | <b>NSulSIA</b>                      |
| 147.1               | <b>y<sub>1</sub></b>                             | 272.2               | <b>SIA</b>                                       | 478.2               | <b>NSu</b>                                       | 649.3 | <b>SulSI-28</b>                     | 874.4 | <b>a<sub>8</sub>-NH<sub>3</sub></b> |
| 155.0               | <b>b<sub>2</sub>-NH<sub>3</sub></b>              | 286.2               | <b>ISI-28</b>                                    | 490.2               | <b>a<sub>4</sub>-NH<sub>3</sub></b>              | 650.3 | <b>NSulS-28</b>                     | 876.5 | <b>y<sub>7</sub>-H<sub>2</sub>O</b> |
| 157.1               | <b>IA-28</b>                                     | 296.2               | <b>ISI-H<sub>2</sub>O</b>                        | 495.8 <sup>+2</sup> | <b>y<sub>8</sub>-H<sub>2</sub>O<sup>+2</sup></b> | 659.3 | <b>SulSI-H<sub>2</sub>O</b>         | 877.5 | <b>y<sub>7</sub>-NH<sub>3</sub></b> |
| 157.6 <sup>+2</sup> | <b>y<sub>3</sub>-NH<sub>3</sub><sup>+2</sup></b> | 314.2               | <b>y<sub>3</sub>-NH<sub>3</sub></b>              | 496.3 <sup>+2</sup> | <b>y<sub>8</sub>-NH<sub>3</sub><sup>+2</sup></b> | 660.3 | <b>NSulS-H<sub>2</sub>O</b>         | 891.4 | <b>a<sub>8</sub></b>                |
| 166.1 <sup>+2</sup> | <b>y<sub>3</sub><sup>+2</sup></b>                | 314.2               | <b>ISI</b>                                       | 504.8 <sup>+2</sup> | <b>y<sub>8</sub><sup>+2</sup></b>                | 661.3 | <b>NSulS-NH<sub>3</sub></b>         | 894.5 | <b>y<sub>7</sub></b>                |
| 172.1               | <b>b<sub>2</sub></b>                             | 331.2               | <b>y<sub>3</sub></b>                             | 507.2               | <b>a<sub>4</sub></b>                             | 661.3 | <b>ulSIA</b>                        | 901.4 | <b>b<sub>8</sub>-H<sub>2</sub>O</b> |
| 173.1               | <b>IS-28</b>                                     | 336.1               | <b>Su-28</b>                                     | 513.3               | <b>y<sub>5</sub>-H<sub>2</sub>O</b>              | 677.3 | <b>SulSI</b>                        | 902.4 | <b>b<sub>8</sub>-NH<sub>3</sub></b> |

|                     |                                                  |                     |                                                  |                     |                                       |       |                                     |        |                                     |
|---------------------|--------------------------------------------------|---------------------|--------------------------------------------------|---------------------|---------------------------------------|-------|-------------------------------------|--------|-------------------------------------|
| 173.1               | <b>SI-28</b>                                     | 346.1               | <b>Su-H<sub>2</sub>O</b>                         | 514.3               | <b>y<sub>5</sub>-NH<sub>3</sub></b>   | 678.3 | <b>NSuIS</b>                        | 919.4  | <b>b<sub>8</sub></b>                |
| 174.1               | <b>NS-28</b>                                     | 357.2               | <b>ISIA-28</b>                                   | 517.2               | <b>b<sub>4</sub>-H<sub>2</sub>O</b>   | 690.3 | <b>a<sub>6</sub>-NH<sub>3</sub></b> | 990.5  | <b>y<sub>8</sub>-H<sub>2</sub>O</b> |
| 183.1               | <b>SI-H<sub>2</sub>O</b>                         | 362.2               | <b>ul-28</b>                                     | 518.2               | <b>b<sub>4</sub>-NH<sub>3</sub></b>   | 707.3 | <b>a<sub>6</sub></b>                | 991.5  | <b>y<sub>8</sub>-NH<sub>3</sub></b> |
| 183.1               | <b>IS-H<sub>2</sub>O</b>                         | 364.1               | <b>Su</b>                                        | 524.3 <sup>+2</sup> | <b>MH-H<sub>2</sub>O<sup>+2</sup></b> | 717.3 | <b>b<sub>6</sub>-H<sub>2</sub>O</b> | 1008.5 | <b>y<sub>8</sub></b>                |
| 184.1               | <b>NS-H<sub>2</sub>O</b>                         | 367.2               | <b>ISIA-H<sub>2</sub>O</b>                       | 524.8 <sup>+2</sup> | <b>MH-NH<sub>3</sub><sup>+2</sup></b> | 718.3 | <b>b<sub>6</sub>-NH<sub>3</sub></b> | 1047.5 | <b>MH-H<sub>2</sub>O</b>            |
| 185.1               | <b>NS-NH<sub>3</sub></b>                         | 385.2               | <b>ISIA</b>                                      | 531.4               | <b>y<sub>5</sub></b>                  | 720.4 | <b>SuISIA-28</b>                    | 1048.5 | <b>MH-NH<sub>3</sub></b>            |
| 185.1               | <b>IA</b>                                        | 390.2               | <b>ul</b>                                        | 533.3 <sup>+2</sup> | <b>MH<sup>+2</sup></b>                | 730.4 | <b>SuISIA-H<sub>2</sub>O</b>        | 1065.5 | <b>MH</b>                           |
| 200.6 <sup>+2</sup> | <b>y<sub>4</sub>-H<sub>2</sub>O<sup>+2</sup></b> | 395.2 <sup>+2</sup> | <b>y<sub>6</sub>-H<sub>2</sub>O<sup>+2</sup></b> | 535.2               | <b>b<sub>4</sub></b>                  | 735.3 | <b>b<sub>6</sub></b>                |        |                                     |
| 201.1               | <b>IS</b>                                        | 395.7 <sup>+2</sup> | <b>y<sub>6</sub>-NH<sub>3</sub><sup>+2</sup></b> | 536.3               | <b>SuIS-28</b>                        | 748.4 | <b>SuISIA</b>                       |        |                                     |
| 201.1               | <b>SI</b>                                        | 400.3               | <b>y<sub>4</sub>-H<sub>2</sub>O</b>              | 546.2               | <b>SuIS-H<sub>2</sub>O</b>            | 763.4 | <b>NSuISI-28</b>                    |        |                                     |
| 201.1 <sup>+2</sup> | <b>y<sub>4</sub>-NH<sub>3</sub><sup>+2</sup></b> | 401.2               | <b>y<sub>4</sub>-NH<sub>3</sub></b>              | 562.3               | <b>uISI-28</b>                        | 773.4 | <b>NSuISI-H<sub>2</sub>O</b>        |        |                                     |

## NLSITTNSSSTYR

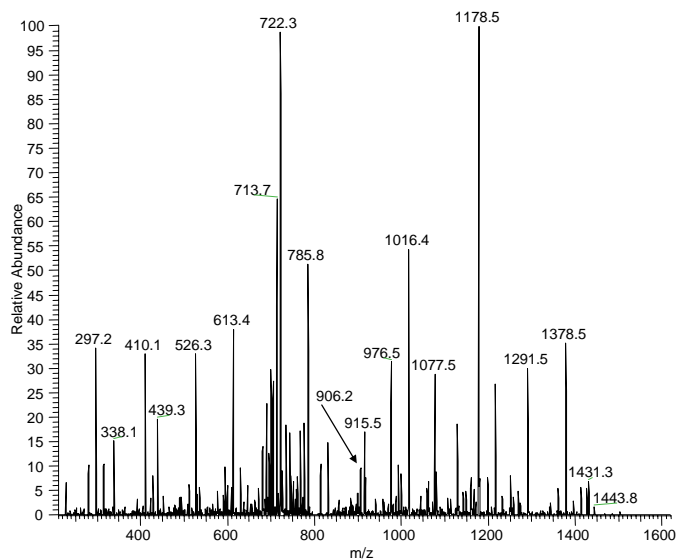

|                    |                                                  |                     |                                                  |       |                                     |                     |                                                               |        |                                     |
|--------------------|--------------------------------------------------|---------------------|--------------------------------------------------|-------|-------------------------------------|---------------------|---------------------------------------------------------------|--------|-------------------------------------|
| 60.0               | <b>S</b>                                         | 297.2               | <b>b<sub>3</sub>-H<sub>2</sub>O</b>              | 501.3 | <b>a<sub>5</sub></b>                | 712.3               | <b>TuSSST-28</b>                                              | 976.4  | <b>b<sub>8</sub>-NH<sub>3</sub></b> |
| 70.1               | <b>R</b>                                         | 298.1               | <b>b<sub>3</sub>-NH<sub>3</sub></b>              | 508.2 | <b>SSSTY-H<sub>2</sub>O</b>         | 712.3               | <b>TTuSSS-28</b>                                              | 986.4  | <b>TTuSSSTY-H<sub>2</sub>O</b>      |
| 74.1               | <b>T</b>                                         | 298.2 <sup>+2</sup> | <b>y<sub>5</sub>-H<sub>2</sub>O<sup>+2</sup></b> | 508.3 | <b>y<sub>4</sub>-H<sub>2</sub>O</b> | 722.3               | <b>TuSSST-H<sub>2</sub>O</b>                                  | 993.5  | <b>b<sub>8</sub></b>                |
| 79.6 <sup>+2</sup> | <b>y<sub>1</sub>-NH<sub>3</sub><sup>+2</sup></b> | 298.2               | <b>ITT-H<sub>2</sub>O</b>                        | 509.2 | <b>y<sub>4</sub>-NH<sub>3</sub></b> | 722.3               | <b>TTuSSS-H<sub>2</sub>O</b>                                  | 1004.4 | <b>TTuSSSTY</b>                     |
| 86.1               | <b>L</b>                                         | 298.6 <sup>+2</sup> | <b>y<sub>5</sub>-NH<sub>3</sub><sup>+2</sup></b> | 510.2 | <b>uSSS-28</b>                      | 737.4 <sup>+2</sup> | <b>y<sub>12</sub><sup>-</sup>-H<sub>2</sub>O<sup>+2</sup></b> | 1013.5 | <b>SITTuSSST-28</b>                 |
| 86.1               | <b>I</b>                                         | 302.2               | <b>SIT</b>                                       | 511.3 | <b>b<sub>5</sub>-H<sub>2</sub>O</b> | 737.9 <sup>+2</sup> | <b>y<sub>12</sub><sup>-</sup>-NH<sub>3</sub><sup>+2</sup></b> | 1023.4 | <b>SITTuSSST-H<sub>2</sub>O</b>     |
| 87.1               | <b>N</b>                                         | 307.2 <sup>+2</sup> | <b>y<sub>5</sub><sup>+2</sup></b>                | 512.3 | <b>b<sub>5</sub>-NH<sub>3</sub></b> | 738.4               | <b>SITTuS-28</b>                                              | 1025.5 | <b>LSITTuSSS-28</b>                 |

|                     |                                               |                     |                                                |                     |                                                |                     |                                   |        |                                   |
|---------------------|-----------------------------------------------|---------------------|------------------------------------------------|---------------------|------------------------------------------------|---------------------|-----------------------------------|--------|-----------------------------------|
| 87.1                | R                                             | 314.2               | LSI                                            | 516.3               | LSITT                                          | 738.4               | ITTuSS-28                         | 1035.5 | a <sub>9</sub> -NH <sub>3</sub>   |
| 88.1 <sup>+2</sup>  | y <sub>1</sub> <sup>+2</sup>                  | 315.2               | b <sub>3</sub>                                 | 520.2               | uSSS-H <sub>2</sub> O                          | 740.3               | TuSSST                            | 1035.5 | LSITTuSSS-H <sub>2</sub> O        |
| 100.1               | R                                             | 316.2               | ITT                                            | 524.2               | TuSS-28                                        | 740.3               | TTuSSS                            | 1041.5 | SITTuSSST                         |
| 112.1               | R                                             | 321.2               | y <sub>2</sub> -NH <sub>3</sub>                | 526.2               | SSSTY                                          | 746.4 <sup>+2</sup> | y <sub>12</sub> <sup>+2</sup>     | 1052.5 | a <sub>9</sub>                    |
| 136.1               | Y                                             | 324.2               | STY-28                                         | 526.3               | y <sub>4</sub>                                 | 748.3               | SITTuS-H <sub>2</sub> O           | 1053.5 | LSITTuSSS                         |
| 147.1               | SS-28                                         | 334.1               | STY-H <sub>2</sub> O                           | 529.3               | b <sub>5</sub>                                 | 748.3               | ITTuSS-H <sub>2</sub> O           | 1059.5 | y <sub>8</sub> -H <sub>2</sub> O  |
| 157.1               | SS-H <sub>2</sub> O                           | 335.2               | SSST-28                                        | 530.2 <sup>+2</sup> | y <sub>8</sub> -H <sub>2</sub> O <sup>+2</sup> | 764.4               | LSITTu-28                         | 1060.4 | y <sub>8</sub> -NH <sub>3</sub>   |
| 158.1               | y <sub>1</sub> -NH <sub>3</sub>               | 336.1               | uS-28                                          | 530.7 <sup>+2</sup> | y <sub>8</sub> -NH <sub>3</sub> <sup>+2</sup>  | 766.3               | SITTuS                            | 1062.5 | b <sub>9</sub> -H <sub>2</sub> O  |
| 161.1 <sup>+2</sup> | y <sub>2</sub> -NH <sub>3</sub> <sup>+2</sup> | 338.2               | y <sub>2</sub>                                 | 534.2               | TuSS-H <sub>2</sub> O                          | 766.3               | ITTuSS                            | 1063.5 | b <sub>9</sub> -NH <sub>3</sub>   |
| 161.1               | ST-28                                         | 341.7 <sup>+2</sup> | y <sub>6</sub> -H <sub>2</sub> O <sup>+2</sup> | 538.2               | uSSS                                           | 774.3               | uSSSTY-28                         | 1077.5 | y <sub>8</sub>                    |
| 169.6 <sup>+2</sup> | y <sub>2</sub> <sup>+2</sup>                  | 342.2 <sup>+2</sup> | y <sub>6</sub> -NH <sub>3</sub> <sup>+2</sup>  | 538.2               | TTuS-28                                        | 774.4               | LSITTu-H <sub>2</sub> O           | 1080.5 | b <sub>9</sub>                    |
| 171.1               | ST-H <sub>2</sub> O                           | 345.1               | SSST-H <sub>2</sub> O                          | 539.2 <sup>+2</sup> | y <sub>8</sub> <sup>+2</sup>                   | 784.3               | uSSSTY-H <sub>2</sub> O           | 1089.5 | ITTuSSSTY-28                      |
| 173.1               | LS-28                                         | 346.1               | uS-H <sub>2</sub> O                            | 548.2               | TTuS-H <sub>2</sub> O                          | 792.4               | LSITTu                            | 1099.5 | ITTuSSSTY-H <sub>2</sub> O        |
| 173.1               | SI-28                                         | 350.2               | Tu-28                                          | 552.2               | TuSS                                           | 794.4 <sup>+2</sup> | MH-H <sub>2</sub> O <sup>+2</sup> | 1117.5 | ITTuSSSTY                         |
| 175.1               | SS                                            | 350.7 <sup>+2</sup> | y <sub>6</sub> <sup>+2</sup>                   | 564.3               | ITTu-28                                        | 794.9 <sup>+2</sup> | MH-NH <sub>3</sub> <sup>+2</sup>  | 1122.5 | a <sub>10</sub> -NH <sub>3</sub>  |
| 175.1               | TT-28                                         | 352.2               | STY                                            | 566.2               | TTuS                                           | 802.3               | uSSSTY                            | 1126.5 | LSITTuSSST-28                     |
| 175.1               | y <sub>1</sub>                                | 360.1               | Tu-H <sub>2</sub> O                            | 574.3               | ITTu-H <sub>2</sub> O                          | 803.4 <sup>+2</sup> | MH <sup>+2</sup>                  | 1136.5 | LSITTuSSST-H <sub>2</sub> O       |
| 183.1               | a <sub>2</sub> -NH <sub>3</sub>               | 363.2               | SSST                                           | 580.8 <sup>+2</sup> | y <sub>9</sub> -H <sub>2</sub> O <sup>+2</sup> | 813.3               | TTuSSST-28                        | 1139.5 | a <sub>10</sub>                   |
| 183.1               | LS-H <sub>2</sub> O                           | 364.1               | uS                                             | 581.3 <sup>+2</sup> | y <sub>9</sub> -NH <sub>3</sub> <sup>+2</sup>  | 823.3               | TTuSSST-H <sub>2</sub> O          | 1149.5 | b <sub>10</sub> -H <sub>2</sub> O |
| 183.1               | SI-H <sub>2</sub> O                           | 375.2               | SITT-28                                        | 585.3               | a <sub>6</sub> -NH <sub>3</sub>                | 825.4               | SITTuS-28                         | 1150.5 | b <sub>10</sub> -NH <sub>3</sub>  |
| 185.1               | TT-H <sub>2</sub> O                           | 378.2               | Tu                                             | 589.8 <sup>+2</sup> | y <sub>9</sub> <sup>+2</sup>                   | 825.4               | ITTuSSS-28                        | 1154.5 | LSITTuSSST                        |
| 187.1               | IT-28                                         | 383.2               | a <sub>4</sub> -NH <sub>3</sub>                | 592.3               | ITTu                                           | 835.4               | SITTuS-S-H <sub>2</sub> O         | 1160.5 | y <sub>9</sub> -H <sub>2</sub> O  |
| 189.1               | ST                                            | 385.2               | SITT-H <sub>2</sub> O                          | 595.3               | y <sub>5</sub> -H <sub>2</sub> O               | 835.4               | ITTuSSS-H <sub>2</sub> O          | 1161.5 | y <sub>9</sub> -NH <sub>3</sub>   |
| 197.1               | IT-H <sub>2</sub> O                           | 387.3               | LSIT-28                                        | 596.3               | y <sub>5</sub> -NH <sub>3</sub>                | 841.3               | TTuSSST                           | 1167.5 | b <sub>10</sub>                   |
| 200.1               | a <sub>2</sub>                                | 397.2               | LSIT-H <sub>2</sub> O                          | 602.4               | a <sub>6</sub>                                 | 851.4               | LSITTuS-28                        | 1176.5 | SITTuSSSTY-28                     |
| 201.1               | SI                                            | 400.3               | a <sub>4</sub>                                 | 611.3               | uSSST-28                                       | 853.4               | SITTuS                            | 1178.5 | y <sub>9</sub>                    |

|                     |                                                |                     |                                                |                     |                                                 |       |                                  |        |                                   |
|---------------------|------------------------------------------------|---------------------|------------------------------------------------|---------------------|-------------------------------------------------|-------|----------------------------------|--------|-----------------------------------|
| 201.1               | LS                                             | 403.2               | SITT                                           | 611.3               | TuSSS-28                                        | 853.4 | ITTuSS S                         | 1186.5 | SITTuS Ssty-H <sub>2</sub> O      |
| 203.1               | TT                                             | 410.2               | b <sub>4</sub> -H <sub>2</sub> O               | 612.3               | b <sub>6</sub> -H <sub>2</sub> O                | 861.4 | LSITTu S-H <sub>2</sub> O        | 1204.5 | SITTuS Ssty                       |
| 211.1               | b <sub>2</sub> -NH <sub>3</sub>                | 411.2               | Ssty-28                                        | 613.3               | y <sub>5</sub>                                  | 861.4 | a <sub>7</sub> -NH <sub>3</sub>  | 1223.6 | a <sub>11</sub> -NH <sub>3</sub>  |
| 211.1 <sup>+2</sup> | y <sub>3</sub> -H <sub>2</sub> O <sup>+2</sup> | 411.2               | b <sub>4</sub> -NH <sub>3</sub>                | 613.3               | b <sub>6</sub> -NH <sub>3</sub>                 | 875.4 | TuSSST Y-28                      | 1240.6 | a <sub>11</sub>                   |
| 211.6 <sup>+2</sup> | y <sub>3</sub> -NH <sub>3</sub> <sup>+2</sup>  | 415.3               | LSIT                                           | 621.2               | uSSST-H <sub>2</sub> O                          | 878.4 | a <sub>7</sub>                   | 1250.6 | b <sub>11</sub> -H <sub>2</sub> O |
| 215.1               | IT                                             | 421.2               | Ssty-H <sub>2</sub> O                          | 621.2               | TuSSS-H <sub>2</sub> O                          | 879.4 | LSITTu S                         | 1251.6 | b <sub>11</sub> -NH <sub>3</sub>  |
| 220.1 <sup>+2</sup> | y <sub>3</sub> <sup>+2</sup>                   | 421.2               | y <sub>3</sub> -H <sub>2</sub> O               | 625.3               | TTuSS-28                                        | 885.3 | TuSSST Y-H <sub>2</sub> O        | 1268.6 | b <sub>11</sub>                   |
| 228.1               | b <sub>2</sub>                                 | 422.2               | y <sub>3</sub> -NH <sub>3</sub>                | 630.3               | b <sub>6</sub>                                  | 888.4 | b <sub>7</sub> -H <sub>2</sub> O | 1273.6 | y <sub>10</sub> -H <sub>2</sub> O |
| 234.1               | SSS-28                                         | 423.2               | uSS-28                                         | 635.3               | TTuSS-H <sub>2</sub> O                          | 889.4 | b <sub>7</sub> -NH <sub>3</sub>  | 1274.6 | y <sub>10</sub> -NH <sub>3</sub>  |
| 237.1               | TY-28                                          | 428.3               | b <sub>4</sub>                                 | 637.3 <sup>+2</sup> | y <sub>10</sub> -H <sub>2</sub> O <sup>+2</sup> | 903.4 | TuSSST Y                         | 1289.6 | LSITTu SSsty-28                   |
| 244.1               | SSS-H <sub>2</sub> O                           | 433.2               | uSS-H <sub>2</sub> O                           | 637.8 <sup>+2</sup> | y <sub>10</sub> -NH <sub>3</sub> <sup>+2</sup>  | 906.4 | b <sub>7</sub>                   | 1291.6 | y <sub>10</sub>                   |
| 247.1               | TY-H <sub>2</sub> O                            | 437.2               | TuS-28                                         | 639.2               | uSSST                                           | 912.4 | SITTuS SS-28                     | 1299.6 | LSITTu SSsty-H <sub>2</sub> O     |
| 248.1               | SST-28                                         | 439.2               | Ssty                                           | 639.2               | TuSSS                                           | 922.4 | SITTuS SS-H <sub>2</sub> O       | 1317.6 | LSITTu SSsty                      |
| 254.6 <sup>+2</sup> | y <sub>4</sub> -H <sub>2</sub> O <sup>+2</sup> | 439.2               | y <sub>3</sub>                                 | 646.3 <sup>2+</sup> | y <sub>10</sub> <sup>+2</sup>                   | 926.4 | ITTuSS ST-28                     | 1360.6 | y <sub>11</sub> -H <sub>2</sub> O |
| 255.1 <sup>+2</sup> | y <sub>4</sub> -NH <sub>3</sub> <sup>+2</sup>  | 447.2               | TuS-H <sub>2</sub> O                           | 651.3               | SITTu-28                                        | 936.4 | ITTuSS ST-H <sub>2</sub> O       | 1361.6 | y <sub>11</sub> -NH <sub>3</sub>  |
| 258.1               | SST-H <sub>2</sub> O                           | 451.2               | uSS                                            | 651.3               | ITTuS-28                                        | 938.5 | LSITTu SS-28                     | 1378.6 | y <sub>11</sub>                   |
| 262.1               | SSS                                            | 451.2               | TTu-28                                         | 653.3               | TTuSS                                           | 940.4 | SITTuS SS                        | 1386.6 | a <sub>12</sub> -NH <sub>3</sub>  |
| 263.6 <sup>+2</sup> | y <sub>4</sub> <sup>+2</sup>                   | 461.2               | TTu-H <sub>2</sub> O                           | 661.3               | ITTuS-H <sub>2</sub> O                          | 948.5 | LSITTu SS-H <sub>2</sub> O       | 1403.7 | a <sub>12</sub>                   |
| 265.1               | TY                                             | 465.2               | TuS                                            | 661.3               | SITTu-H <sub>2</sub> O                          | 948.5 | a <sub>8</sub> -NH <sub>3</sub>  | 1413.6 | b <sub>12</sub> -H <sub>2</sub> O |
| 270.1               | a <sub>3</sub> -NH <sub>3</sub>                | 479.2               | TTu                                            | 679.3               | SITTu                                           | 954.4 | ITTuSS ST                        | 1414.6 | b <sub>12</sub> -NH <sub>3</sub>  |
| 274.2               | SIT-28                                         | 479.7 <sup>+2</sup> | y <sub>7</sub> -H <sub>2</sub> O <sup>+2</sup> | 679.3               | ITTuS                                           | 958.4 | y <sub>7</sub> -H <sub>2</sub> O | 1431.6 | b <sub>12</sub>                   |
| 276.1               | SST                                            | 480.2 <sup>+2</sup> | y <sub>7</sub> -NH <sub>3</sub> <sup>+2</sup>  | 680.8 <sup>+2</sup> | y <sub>11</sub> -H <sub>2</sub> O <sup>+2</sup> | 959.4 | y <sub>7</sub> -NH <sub>3</sub>  | 1473.7 | y <sub>12</sub> -H <sub>2</sub> O |
| 284.2               | SIT-H <sub>2</sub> O                           | 484.3               | a <sub>5</sub> -NH <sub>3</sub>                | 681.3 <sup>+2</sup> | y <sub>11</sub> -NH <sub>3</sub> <sup>+2</sup>  | 965.5 | a <sub>8</sub>                   | 1474.7 | y <sub>12</sub> -NH <sub>3</sub>  |
| 286.2               | LSI-28                                         | 488.3               | LSITT-28                                       | 682.3               | y <sub>6</sub> -H <sub>2</sub> O                | 966.5 | LSITTu SS                        | 1491.7 | y <sub>12</sub>                   |
| 287.2               | a <sub>3</sub>                                 | 488.7 <sup>+2</sup> | y <sub>7</sub> <sup>+2</sup>                   | 683.3               | y <sub>6</sub> -NH <sub>3</sub>                 | 975.5 | b <sub>8</sub> -H <sub>2</sub> O | 1587.7 | MH-H <sub>2</sub> O               |
| 288.2               | ITT-28                                         | 498.2               | SSsty-28                                       | 689.8 <sup>+2</sup> | y <sub>11</sub> <sup>+2</sup>                   | 976.4 | TTuSSS TY-28                     | 1588.7 | MH-NH <sub>3</sub>                |
| 296.2               | LSI-H <sub>2</sub> O                           | 498.3               | LSITT-H <sub>2</sub> O                         | 700.3               | y <sub>6</sub>                                  | 976.4 | y <sub>7</sub>                   | 1605.8 | MH                                |

# NLSITTNSSSTYR

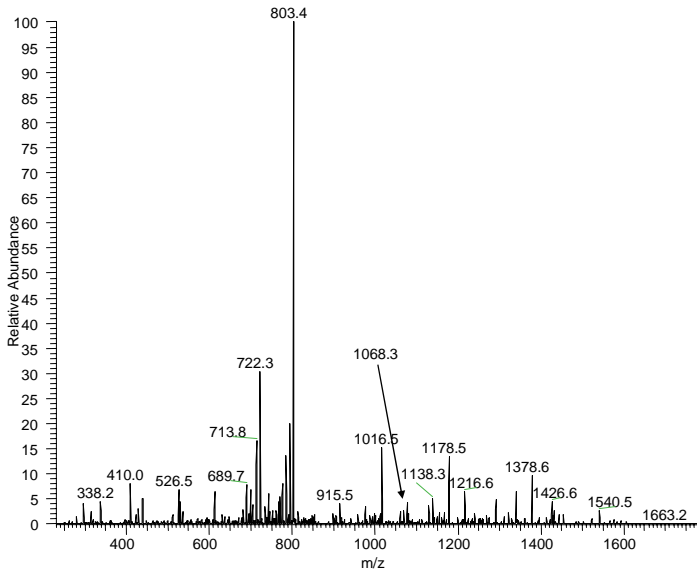

|                     |                                                  |                     |                                                  |                     |                                                  |                     |                                            |        |                                           |
|---------------------|--------------------------------------------------|---------------------|--------------------------------------------------|---------------------|--------------------------------------------------|---------------------|--------------------------------------------|--------|-------------------------------------------|
| 60.0                | <b>S</b>                                         | 297.2               | <b>b<sub>3</sub>-H<sub>2</sub>O</b>              | 569.7 <sup>+2</sup> | <b>y<sub>7</sub><sup>+2</sup></b>                | 827.4 <sup>+2</sup> | <b>y<sub>12</sub><sup>+2</sup></b>         | 1138.5 | <b>b<sub>8</sub>-NH<sub>3</sub></b>       |
| 70.1                | <b>R</b>                                         | 298.1               | <b>b<sub>3</sub>-NH<sub>3</sub></b>              | 585.2               | <b>vSS-28</b>                                    | 841.4               | <b>SITTv</b>                               | 1148.4 | <b>TTvSSS<br/>TY-H<sub>2</sub>O</b>       |
| 74.1                | <b>T</b>                                         | 298.2 <sup>+2</sup> | <b>y<sub>5</sub>-H<sub>2</sub>O<sup>+2</sup></b> | 585.3               | <b>a<sub>6</sub>-NH<sub>3</sub></b>              | 841.4               | <b>ITTvS</b>                               | 1155.5 | <b>b<sub>8</sub></b>                      |
| 79.6 <sup>+2</sup>  | <b>y<sub>1</sub>-NH<sub>3</sub><sup>+2</sup></b> | 298.2               | <b>ITT-H<sub>2</sub>O</b>                        | 595.2               | <b>vSS-<br/>H<sub>2</sub>O</b>                   | 874.4               | <b>TvSSST<br/>-28</b>                      | 1166.5 | <b>TTvSSS<br/>TY</b>                      |
| 86.1                | <b>L</b>                                         | 298.6 <sup>+2</sup> | <b>y<sub>5</sub>-NH<sub>3</sub><sup>+2</sup></b> | 595.3               | <b>y<sub>5</sub>-H<sub>2</sub>O</b>              | 874.4               | <b>TTvSSS<br/>-28</b>                      | 1175.5 | <b>SITTvS<br/>SST-28</b>                  |
| 86.1                | <b>I</b>                                         | 302.2               | <b>SIT</b>                                       | 596.3               | <b>y<sub>5</sub>-NH<sub>3</sub></b>              | 875.4 <sup>+2</sup> | <b>MH-<br/>H<sub>2</sub>O<sup>+2</sup></b> | 1185.5 | <b>SITTvS<br/>SST-<br/>H<sub>2</sub>O</b> |
| 87.1                | <b>N</b>                                         | 307.2 <sup>+2</sup> | <b>y<sub>5</sub><sup>+2</sup></b>                | 599.2               | <b>TvS-28</b>                                    | 875.9 <sup>+2</sup> | <b>MH-<br/>NH<sub>3</sub><sup>+2</sup></b> | 1187.6 | <b>LSITTv<br/>SSS-28</b>                  |
| 87.1                | <b>R</b>                                         | 314.2               | <b>LSI</b>                                       | 602.4               | <b>a<sub>6</sub></b>                             | 884.3               | <b>TvSSST<br/>-H<sub>2</sub>O</b>          | 1197.5 | <b>LSITTv<br/>SSS-<br/>H<sub>2</sub>O</b> |
| 88.1 <sup>+2</sup>  | <b>y<sub>1</sub><sup>+2</sup></b>                | 315.2               | <b>b<sub>3</sub></b>                             | 609.2               | <b>TvS-<br/>H<sub>2</sub>O</b>                   | 884.3               | <b>TTvSSS<br/>-H<sub>2</sub>O</b>          | 1197.5 | <b>a<sub>9</sub>-NH<sub>3</sub></b>       |
| 100.1               | <b>R</b>                                         | 316.2               | <b>ITT</b>                                       | 611.3 <sup>+2</sup> | <b>y<sub>8</sub>-H<sub>2</sub>O<sup>+2</sup></b> | 884.4 <sup>+2</sup> | <b>MH<sup>+2</sup></b>                     | 1203.5 | <b>SITTvS<br/>SST</b>                     |
| 112.1               | <b>R</b>                                         | 321.2               | <b>y<sub>2</sub>-NH<sub>3</sub></b>              | 611.8 <sup>+2</sup> | <b>y<sub>8</sub>-NH<sub>3</sub><sup>+2</sup></b> | 900.4               | <b>SITTvS-<br/>28</b>                      | 1214.6 | <b>a<sub>9</sub></b>                      |
| 136.1               | <b>Y</b>                                         | 324.2               | <b>STY-28</b>                                    | 612.3               | <b>b<sub>6</sub>-H<sub>2</sub>O</b>              | 900.4               | <b>ITTvSS-<br/>28</b>                      | 1215.5 | <b>LSITTv<br/>SSS</b>                     |
| 147.1               | <b>SS-28</b>                                     | 334.1               | <b>STY-<br/>H<sub>2</sub>O</b>                   | 613.2               | <b>vSS</b>                                       | 902.3               | <b>TvSSST</b>                              | 1221.5 | <b>y<sub>8</sub>-H<sub>2</sub>O</b>       |
| 157.1               | <b>SS-H<sub>2</sub>O</b>                         | 335.2               | <b>SSST-<br/>28</b>                              | 613.3               | <b>TTv-28</b>                                    | 902.3               | <b>TTvSSS</b>                              | 1222.5 | <b>y<sub>8</sub>-NH<sub>3</sub></b>       |
| 158.1               | <b>y<sub>1</sub>-NH<sub>3</sub></b>              | 338.2               | <b>y<sub>2</sub></b>                             | 613.3               | <b>y<sub>5</sub></b>                             | 910.4               | <b>SITTvS-<br/>H<sub>2</sub>O</b>          | 1224.5 | <b>b<sub>9</sub>-H<sub>2</sub>O</b>       |
| 161.1 <sup>+2</sup> | <b>y<sub>2</sub>-NH<sub>3</sub><sup>+2</sup></b> | 341.7 <sup>+2</sup> | <b>y<sub>6</sub>-H<sub>2</sub>O<sup>+2</sup></b> | 613.3               | <b>b<sub>6</sub>-NH<sub>3</sub></b>              | 910.4               | <b>ITTvSS-<br/>H<sub>2</sub>O</b>          | 1225.5 | <b>b<sub>9</sub>-NH<sub>3</sub></b>       |
| 161.1               | <b>ST-28</b>                                     | 342.2 <sup>+2</sup> | <b>y<sub>6</sub>-NH<sub>3</sub><sup>+2</sup></b> | 620.3 <sup>+2</sup> | <b>y<sub>8</sub><sup>+2</sup></b>                | 926.5               | <b>LSITTv-<br/>28</b>                      | 1239.5 | <b>y<sub>8</sub></b>                      |

|                     |                                                  |                     |                                     |                     |                                                        |        |                                     |        |                                            |
|---------------------|--------------------------------------------------|---------------------|-------------------------------------|---------------------|--------------------------------------------------------|--------|-------------------------------------|--------|--------------------------------------------|
| 169.6 <sup>+2</sup> | <b>y<sub>2</sub><sup>+2</sup></b>                | 345.1               | <b>SSST-H<sub>2</sub>O</b>          | 623.2               | <b>TTv-H<sub>2</sub>O</b>                              | 928.4  | <b>SITTvS</b>                       | 1242.6 | <b>b<sub>9</sub></b>                       |
| 171.1               | <b>ST-H<sub>2</sub>O</b>                         | 350.7 <sup>+2</sup> | <b>y<sub>6</sub><sup>+2</sup></b>   | 627.2               | <b>TvS</b>                                             | 928.4  | <b>ITTVSS</b>                       | 1251.5 | <b>ITTVSS<br/>STY-28</b>                   |
| 173.1               | <b>SI-28</b>                                     | 352.2               | <b>STY</b>                          | 630.3               | <b>b<sub>6</sub></b>                                   | 936.4  | <b>vSSSTY-28</b>                    | 1261.5 | <b>ITTVSS<br/>STY-<br/>H<sub>2</sub>O</b>  |
| 173.1               | <b>LS-28</b>                                     | 363.2               | <b>SSST</b>                         | 641.3               | <b>TTv</b>                                             | 936.4  | <b>LSITTv-<br/>H<sub>2</sub>O</b>   | 1279.5 | <b>ITTVSS<br/>STY</b>                      |
| 175.1               | <b>SS</b>                                        | 375.2               | <b>SITT-28</b>                      | 661.8 <sup>+2</sup> | <b>y<sub>9</sub>-H<sub>2</sub>O<sup>+2</sup></b>       | 946.4  | <b>vSSSTY-<br/>H<sub>2</sub>O</b>   | 1284.6 | <b>a<sub>10</sub>-NH<sub>3</sub></b>       |
| 175.1               | <b>TT-28</b>                                     | 383.2               | <b>a<sub>4</sub>-NH<sub>3</sub></b> | 662.3 <sup>+2</sup> | <b>y<sub>9</sub>-NH<sub>3</sub><sup>+2</sup></b>       | 954.5  | <b>LSITTv</b>                       | 1288.6 | <b>LSITTv<br/>SSST-<br/>28</b>             |
| 175.1               | <b>y<sub>1</sub></b>                             | 385.2               | <b>SITT-<br/>H<sub>2</sub>O</b>     | 670.8 <sup>+2</sup> | <b>y<sub>9</sub><sup>+2</sup></b>                      | 964.4  | <b>vSSSTY</b>                       | 1298.6 | <b>LSITTv<br/>SSST-<br/>H<sub>2</sub>O</b> |
| 183.1               | <b>a<sub>2</sub>-NH<sub>3</sub></b>              | 387.3               | <b>LSIT-28</b>                      | 672.3               | <b>vSSS-<br/>28</b>                                    | 975.4  | <b>TTvSSS<br/>T-28</b>              | 1301.6 | <b>a<sub>10</sub></b>                      |
| 183.1               | <b>LS-H<sub>2</sub>O</b>                         | 397.2               | <b>LSIT-<br/>H<sub>2</sub>O</b>     | 682.2               | <b>vSSS-<br/>H<sub>2</sub>O</b>                        | 985.4  | <b>TTvSSS<br/>T-H<sub>2</sub>O</b>  | 1311.6 | <b>b<sub>10</sub>-H<sub>2</sub>O</b>       |
| 183.1               | <b>SI-H<sub>2</sub>O</b>                         | 400.3               | <b>a<sub>4</sub></b>                | 682.3               | <b>y<sub>6</sub>-H<sub>2</sub>O</b>                    | 987.4  | <b>SITTvS<br/>S-28</b>              | 1312.6 | <b>b<sub>10</sub>-NH<sub>3</sub></b>       |
| 185.1               | <b>TT-H<sub>2</sub>O</b>                         | 403.2               | <b>SITT</b>                         | 683.3               | <b>y<sub>6</sub>-NH<sub>3</sub></b>                    | 987.4  | <b>ITTVSS<br/>S-28</b>              | 1316.6 | <b>LSITTv<br/>SSST</b>                     |
| 187.1               | <b>IT-28</b>                                     | 410.2               | <b>b<sub>4</sub>-H<sub>2</sub>O</b> | 686.3               | <b>TvSS-28</b>                                         | 997.4  | <b>SITTvS<br/>S-H<sub>2</sub>O</b>  | 1322.6 | <b>y<sub>9</sub>-H<sub>2</sub>O</b>        |
| 189.1               | <b>ST</b>                                        | 411.2               | <b>SSTY-<br/>28</b>                 | 696.3               | <b>TvSS-<br/>H<sub>2</sub>O</b>                        | 997.4  | <b>ITTVSS<br/>S-H<sub>2</sub>O</b>  | 1323.5 | <b>y<sub>9</sub>-NH<sub>3</sub></b>        |
| 197.1               | <b>IT-H<sub>2</sub>O</b>                         | 411.2               | <b>b<sub>4</sub>-NH<sub>3</sub></b> | 700.3               | <b>vSSS</b>                                            | 1003.4 | <b>TTvSSS<br/>T</b>                 | 1329.6 | <b>b<sub>10</sub></b>                      |
| 200.1               | <b>a<sub>2</sub></b>                             | 415.3               | <b>LSIT</b>                         | 700.3               | <b>TTvS-28</b>                                         | 1013.5 | <b>LSITTv<br/>S-28</b>              | 1338.6 | <b>SITTvS<br/>SSTY-<br/>28</b>             |
| 201.1               | <b>LS</b>                                        | 421.2               | <b>SSTY-<br/>H<sub>2</sub>O</b>     | 700.3               | <b>y<sub>6</sub></b>                                   | 1015.4 | <b>SITTvS<br/>S</b>                 | 1340.6 | <b>y<sub>9</sub></b>                       |
| 201.1               | <b>SI</b>                                        | 421.2               | <b>y<sub>3</sub>-H<sub>2</sub>O</b> | 710.3               | <b>TTvS-<br/>H<sub>2</sub>O</b>                        | 1015.4 | <b>ITTVSS<br/>S</b>                 | 1348.6 | <b>SITTvS<br/>SSTY-<br/>H<sub>2</sub>O</b> |
| 203.1               | <b>TT</b>                                        | 422.2               | <b>y<sub>3</sub>-NH<sub>3</sub></b> | 714.3               | <b>TvSS</b>                                            | 1023.5 | <b>LSITTv<br/>S-H<sub>2</sub>O</b>  | 1366.6 | <b>SITTvS<br/>SSTY</b>                     |
| 211.1               | <b>b<sub>2</sub>-NH<sub>3</sub></b>              | 428.3               | <b>b<sub>4</sub></b>                | 718.3 <sup>+2</sup> | <b>y<sub>10</sub>-<br/>H<sub>2</sub>O<sup>+2</sup></b> | 1023.5 | <b>a<sub>7</sub>-NH<sub>3</sub></b> | 1385.6 | <b>a<sub>11</sub>-NH<sub>3</sub></b>       |
| 211.1 <sup>+2</sup> | <b>y<sub>3</sub>-H<sub>2</sub>O<sup>+2</sup></b> | 439.2               | <b>SSTY</b>                         | 718.8 <sup>+2</sup> | <b>y<sub>10</sub>-<br/>NH<sub>3</sub><sup>+2</sup></b> | 1037.4 | <b>TvSSST<br/>Y-28</b>              | 1402.6 | <b>a<sub>11</sub></b>                      |
| 211.6 <sup>+2</sup> | <b>y<sub>3</sub>-NH<sub>3</sub><sup>+2</sup></b> | 439.2               | <b>y<sub>3</sub></b>                | 726.3               | <b>ITTV-28</b>                                         | 1040.5 | <b>a<sub>7</sub></b>                | 1412.6 | <b>b<sub>11</sub>-H<sub>2</sub>O</b>       |
| 215.1               | <b>IT</b>                                        | 484.3               | <b>a<sub>5</sub>-NH<sub>3</sub></b> | 727.3 <sup>+2</sup> | <b>y<sub>10</sub><sup>+2</sup></b>                     | 1041.5 | <b>LSITTv<br/>S</b>                 | 1413.6 | <b>b<sub>11</sub>-NH<sub>3</sub></b>       |
| 220.1 <sup>2+</sup> | <b>y<sub>3</sub><sup>+2</sup></b>                | 488.3               | <b>LSITT-<br/>28</b>                | 728.3               | <b>TTvS</b>                                            | 1047.4 | <b>TvSSST<br/>Y-H<sub>2</sub>O</b>  | 1430.6 | <b>b<sub>11</sub></b>                      |
| 228.1               | <b>b<sub>2</sub></b>                             | 498.2               | <b>vS-28</b>                        | 736.3               | <b>ITTV-<br/>H<sub>2</sub>O</b>                        | 1050.5 | <b>b<sub>7</sub>-H<sub>2</sub>O</b> | 1435.6 | <b>y<sub>10</sub>-H<sub>2</sub>O</b>       |
| 234.1               | <b>SSS-28</b>                                    | 498.2               | <b>SSSTY-<br/>28</b>                | 754.3               | <b>ITTV</b>                                            | 1051.5 | <b>b<sub>7</sub>-NH<sub>3</sub></b> | 1436.6 | <b>y<sub>10</sub>-NH<sub>3</sub></b>       |
| 237.1               | <b>TY-28</b>                                     | 498.3               | <b>LSITT-<br/>H<sub>2</sub>O</b>    | 761.8 <sup>+2</sup> | <b>y<sub>11</sub>-<br/>H<sub>2</sub>O<sup>+2</sup></b> | 1065.4 | <b>TvSSST<br/>Y</b>                 | 1451.7 | <b>LSITTv<br/>SSSTY-</b>                   |

|                     |                                                  |                     |                                                  |                     |                                                               |        |                                     |        |                                      |
|---------------------|--------------------------------------------------|---------------------|--------------------------------------------------|---------------------|---------------------------------------------------------------|--------|-------------------------------------|--------|--------------------------------------|
|                     |                                                  |                     |                                                  |                     |                                                               |        |                                     |        | <b>28</b>                            |
| 244.1               | <b>SSS-H<sub>2</sub>O</b>                        | 501.3               | <b>a<sub>5</sub></b>                             | 762.3 <sup>+2</sup> | <b>y<sub>11</sub><sup>-</sup>-NH<sub>3</sub><sup>+2</sup></b> | 1068.5 | <b>b<sub>7</sub></b>                | 1453.7 | <b>y<sub>10</sub></b>                |
| 247.1               | <b>TY-H<sub>2</sub>O</b>                         | 508.2               | <b>vS-H<sub>2</sub>O</b>                         | 770.9 <sup>+2</sup> | <b>y<sub>11</sub><sup>+2</sup></b>                            | 1074.5 | <b>SITTVS SS-28</b>                 | 1461.6 | <b>LSITTV SSSTY-H<sub>2</sub>O</b>   |
| 248.1               | <b>SST-28</b>                                    | 508.2               | <b>SSSTY-H<sub>2</sub>O</b>                      | 773.3               | <b>vSSST-28</b>                                               | 1084.5 | <b>SITTVS SS-H<sub>2</sub>O</b>     | 1479.7 | <b>LSITTV SSSTY</b>                  |
| 254.6 <sup>+2</sup> | <b>y<sub>4</sub>-H<sub>2</sub>O<sup>+2</sup></b> | 508.3               | <b>y<sub>4</sub>-H<sub>2</sub>O</b>              | 773.3               | <b>TvSSS-28</b>                                               | 1088.5 | <b>ITTVSS ST-28</b>                 | 1522.7 | <b>y<sub>11</sub>-H<sub>2</sub>O</b> |
| 255.1 <sup>+2</sup> | <b>y<sub>4</sub>-NH<sub>3</sub><sup>+2</sup></b> | 509.2               | <b>y<sub>4</sub>-NH<sub>3</sub></b>              | 783.3               | <b>vSSST-H<sub>2</sub>O</b>                                   | 1098.5 | <b>ITTVSS ST-H<sub>2</sub>O</b>     | 1523.7 | <b>y<sub>11</sub>-NH<sub>3</sub></b> |
| 258.1               | <b>SST-H<sub>2</sub>O</b>                        | 511.3               | <b>b<sub>5</sub>-H<sub>2</sub>O</b>              | 783.3               | <b>TvSSS-H<sub>2</sub>O</b>                                   | 1100.5 | <b>LSITTV SS-28</b>                 | 1540.7 | <b>y<sub>11</sub></b>                |
| 262.1               | <b>SSS</b>                                       | 512.2               | <b>Tv-28</b>                                     | 787.3               | <b>TTvSS-28</b>                                               | 1102.5 | <b>SITTVS SS</b>                    | 1548.7 | <b>a<sub>12</sub>-NH<sub>3</sub></b> |
| 263.6 <sup>+2</sup> | <b>y<sub>4</sub><sup>+2</sup></b>                | 512.3               | <b>b<sub>5</sub>-NH<sub>3</sub></b>              | 797.3               | <b>TTvSS-H<sub>2</sub>O</b>                                   | 1110.5 | <b>LSITTV SS-H<sub>2</sub>O</b>     | 1565.7 | <b>a<sub>12</sub></b>                |
| 265.1               | <b>TY</b>                                        | 516.3               | <b>LSITT</b>                                     | 801.3               | <b>vSSST</b>                                                  | 1110.5 | <b>a<sub>8</sub>-NH<sub>3</sub></b> | 1575.7 | <b>b<sub>12</sub>-H<sub>2</sub>O</b> |
| 270.1               | <b>a<sub>3</sub>-NH<sub>3</sub></b>              | 522.2               | <b>Tv-H<sub>2</sub>O</b>                         | 801.3               | <b>TvSSS</b>                                                  | 1116.5 | <b>ITTVSS ST</b>                    | 1576.7 | <b>b<sub>12</sub>-NH<sub>3</sub></b> |
| 274.2               | <b>SIT-28</b>                                    | 526.2               | <b>vS</b>                                        | 813.4               | <b>SITTV-28</b>                                               | 1120.5 | <b>y<sub>7</sub>-H<sub>2</sub>O</b> | 1593.7 | <b>b<sub>12</sub></b>                |
| 276.1               | <b>SST</b>                                       | 526.2               | <b>SSSTY</b>                                     | 813.4               | <b>ITTVS-28</b>                                               | 1121.4 | <b>y<sub>7</sub>-NH<sub>3</sub></b> | 1635.8 | <b>y<sub>12</sub>-H<sub>2</sub>O</b> |
| 284.2               | <b>SIT-H<sub>2</sub>O</b>                        | 526.3               | <b>y<sub>4</sub></b>                             | 815.3               | <b>TTvSS</b>                                                  | 1127.5 | <b>a<sub>8</sub></b>                | 1636.7 | <b>y<sub>12</sub>-NH<sub>3</sub></b> |
| 286.2               | <b>LSI-28</b>                                    | 529.3               | <b>b<sub>5</sub></b>                             | 818.4 <sup>+2</sup> | <b>y<sub>12</sub><sup>-</sup>-H<sub>2</sub>O<sup>+2</sup></b> | 1128.5 | <b>LSITTV SS</b>                    | 1653.8 | <b>y<sub>12</sub></b>                |
| 287.2               | <b>a<sub>3</sub></b>                             | 540.2               | <b>Tv</b>                                        | 818.9 <sup>+2</sup> | <b>y<sub>12</sub><sup>-</sup>-NH<sub>3</sub><sup>+2</sup></b> | 1137.5 | <b>b<sub>8</sub>-H<sub>2</sub>O</b> | 1749.8 | <b>MH-H<sub>2</sub>O</b>             |
| 288.2               | <b>ITT-28</b>                                    | 560.7 <sup>+2</sup> | <b>y<sub>7</sub>-H<sub>2</sub>O<sup>+2</sup></b> | 823.4               | <b>SITTV-H<sub>2</sub>O</b>                                   | 1138.5 | <b>TTvSSS TY-28</b>                 | 1750.8 | <b>MH-NH<sub>3</sub></b>             |
| 296.2               | <b>LSI-H<sub>2</sub>O</b>                        | 561.2 <sup>+2</sup> | <b>y<sub>7</sub>-NH<sub>3</sub><sup>+2</sup></b> | 823.4               | <b>ITTVS-H<sub>2</sub>O</b>                                   | 1138.5 | <b>y<sub>7</sub></b>                | 1767.8 | <b>MH</b>                            |



# NLSITTSSTYR

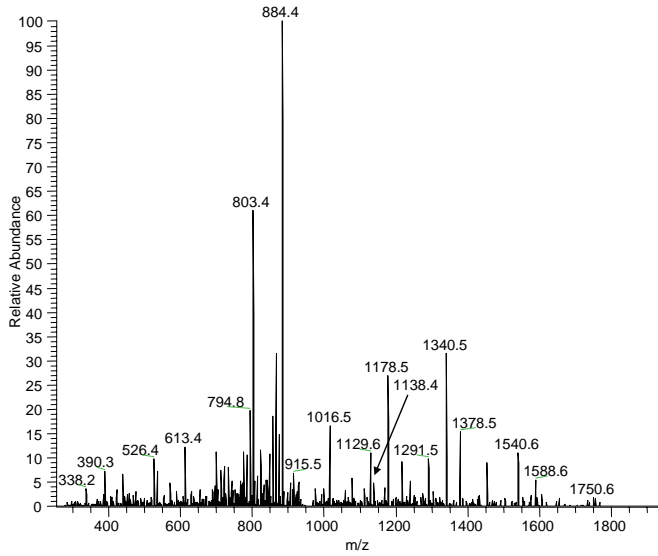

|                     |                                                  |                     |                                                  |                     |                                                  |                     |                                    |        |                                     |
|---------------------|--------------------------------------------------|---------------------|--------------------------------------------------|---------------------|--------------------------------------------------|---------------------|------------------------------------|--------|-------------------------------------|
| 60.0                | <b>S</b>                                         | 302.2               | <b>SIT</b>                                       | 596.3               | <b>y<sub>5</sub>-NH<sub>3</sub></b>              | 823.4               | <b>ITTVS-H<sub>2</sub>O</b>        | 1185.5 | <b>SITTVS SST-H<sub>2</sub>O</b>    |
| 70.1                | <b>R</b>                                         | 307.2 <sup>+2</sup> | <b>y<sub>5</sub><sup>+2</sup></b>                | 599.2               | <b>TvS-28</b>                                    | 827.4 <sup>+2</sup> | <b>y<sub>12</sub><sup>+2</sup></b> | 1187.6 | <b>LSITTV SSS-28</b>                |
| 74.1                | <b>T</b>                                         | 314.2               | <b>LSI</b>                                       | 609.2               | <b>TvS-H<sub>2</sub>O</b>                        | 841.4               | <b>SITTV</b>                       | 1197.5 | <b>LSITTV SSS-H<sub>2</sub>O</b>    |
| 79.6 <sup>+2</sup>  | <b>y<sub>1</sub>-NH<sub>3</sub><sup>+2</sup></b> | 316.2               | <b>ITT</b>                                       | 611.3 <sup>+2</sup> | <b>y<sub>8</sub>-H<sub>2</sub>O<sup>+2</sup></b> | 841.4               | <b>ITTVS</b>                       | 1202.6 | <b>a<sub>7</sub></b>                |
| 86.1                | <b>L</b>                                         | 321.2               | <b>y<sub>2</sub>-NH<sub>3</sub></b>              | 611.8 <sup>+2</sup> | <b>y<sub>8</sub>-NH<sub>3</sub><sup>+2</sup></b> | 874.4               | <b>TvSSST -28</b>                  | 1203.5 | <b>SITTVS SST</b>                   |
| 86.1                | <b>I</b>                                         | 324.2               | <b>STY-28</b>                                    | 613.2               | <b>vSS</b>                                       | 874.4               | <b>TTvSSS -28</b>                  | 1212.5 | <b>b<sub>7</sub>-H<sub>2</sub>O</b> |
| 87.1                | <b>R</b>                                         | 334.1               | <b>STY-H<sub>2</sub>O</b>                        | 613.3               | <b>TTv-28</b>                                    | 884.3               | <b>TvSSST -H<sub>2</sub>O</b>      | 1215.5 | <b>LSITTV SSS</b>                   |
| 88.1 <sup>+2</sup>  | <b>y<sub>1</sub><sup>+2</sup></b>                | 335.2               | <b>SSST-28</b>                                   | 613.3               | <b>y<sub>5</sub></b>                             | 884.3               | <b>TTvSSS -H<sub>2</sub>O</b>      | 1221.5 | <b>y<sub>8</sub>-H<sub>2</sub>O</b> |
| 100.1               | <b>R</b>                                         | 338.2               | <b>y<sub>2</sub></b>                             | 620.3 <sup>+2</sup> | <b>y<sub>8</sub><sup>+2</sup></b>                | 900.4               | <b>SITTVS-28</b>                   | 1222.5 | <b>y<sub>8</sub>-NH<sub>3</sub></b> |
| 112.1               | <b>R</b>                                         | 341.7 <sup>+2</sup> | <b>y<sub>6</sub>-H<sub>2</sub>O<sup>+2</sup></b> | 623.2               | <b>TTv-H<sub>2</sub>O</b>                        | 900.4               | <b>ITTVSS-28</b>                   | 1230.5 | <b>b<sub>7</sub></b>                |
| 136.1               | <b>Y</b>                                         | 342.2 <sup>+2</sup> | <b>y<sub>6</sub>-NH<sub>3</sub><sup>+2</sup></b> | 627.2               | <b>TvS</b>                                       | 902.3               | <b>TvSSST</b>                      | 1239.5 | <b>y<sub>8</sub></b>                |
| 147.1               | <b>SS-28</b>                                     | 345.1               | <b>SSST-H<sub>2</sub>O</b>                       | 641.3               | <b>TTv</b>                                       | 902.3               | <b>TTvSSS</b>                      | 1251.5 | <b>ITTVSS STY-28</b>                |
| 157.1               | <b>SS-H<sub>2</sub>O</b>                         | 350.7 <sup>+2</sup> | <b>y<sub>6</sub><sup>+2</sup></b>                | 661.8 <sup>+2</sup> | <b>y<sub>9</sub>-H<sub>2</sub>O<sup>+2</sup></b> | 910.4               | <b>SITTVS-H<sub>2</sub>O</b>       | 1261.5 | <b>ITTVSS STY-H<sub>2</sub>O</b>    |
| 158.1               | <b>y<sub>1</sub>-NH<sub>3</sub></b>              | 352.2               | <b>STY</b>                                       | 662.3 <sup>+2</sup> | <b>y<sub>9</sub>-NH<sub>3</sub><sup>+2</sup></b> | 910.4               | <b>ITTVSS-H<sub>2</sub>O</b>       | 1279.5 | <b>ITTVSS STY</b>                   |
| 161.1 <sup>+2</sup> | <b>y<sub>2</sub>-NH<sub>3</sub><sup>+2</sup></b> | 362.2               | <b>a<sub>2</sub></b>                             | 663.4               | <b>a<sub>5</sub></b>                             | 926.5               | <b>LSITTV-28</b>                   | 1288.6 | <b>LSITTV SSST-28</b>               |
| 161.1               | <b>ST-28</b>                                     | 363.2               | <b>SSST</b>                                      | 670.8 <sup>+2</sup> | <b>y<sub>9</sub><sup>+2</sup></b>                | 928.4               | <b>SITTVS</b>                      | 1289.6 | <b>a<sub>8</sub></b>                |

|                     |                                                  |       |                                     |                     |                                                        |                     |                                            |        |                                             |
|---------------------|--------------------------------------------------|-------|-------------------------------------|---------------------|--------------------------------------------------------|---------------------|--------------------------------------------|--------|---------------------------------------------|
| 169.6 <sup>+2</sup> | <b>y<sub>2</sub><sup>+2</sup></b>                | 375.2 | <b>SITT-28</b>                      | 672.3               | <b>vSSS-28</b>                                         | 928.4               | <b>ITTVSS</b>                              | 1298.6 | <b>LSITTv<br/>SSST-<br/>H<sub>2</sub>O</b>  |
| 171.1               | <b>ST-H<sub>2</sub>O</b>                         | 385.2 | <b>SITT-<br/>H<sub>2</sub>O</b>     | 673.3               | <b>b<sub>5</sub>-H<sub>2</sub>O</b>                    | 936.4               | <b>vSSSTY<br/>-28</b>                      | 1299.6 | <b>b<sub>8</sub>-H<sub>2</sub>O</b>         |
| 173.1               | <b>LS-28</b>                                     | 387.3 | <b>LSIT-28</b>                      | 682.2               | <b>vSSS-<br/>H<sub>2</sub>O</b>                        | 936.4               | <b>LSITTv-<br/>H<sub>2</sub>O</b>          | 1316.6 | <b>LSITTv<br/>SSST</b>                      |
| 173.1               | <b>SI-28</b>                                     | 390.2 | <b>b<sub>2</sub></b>                | 682.3               | <b>y<sub>6</sub>-H<sub>2</sub>O</b>                    | 946.4               | <b>vSSSTY<br/>-H<sub>2</sub>O</b>          | 1317.6 | <b>b<sub>8</sub></b>                        |
| 175.1               | <b>SS</b>                                        | 397.2 | <b>LSIT-<br/>H<sub>2</sub>O</b>     | 683.3               | <b>y<sub>6</sub>-NH<sub>3</sub></b>                    | 954.5               | <b>LSITTv</b>                              | 1322.6 | <b>y<sub>9</sub>-H<sub>2</sub>O</b>         |
| 175.1               | <b>TT-28</b>                                     | 403.2 | <b>SITT</b>                         | 686.3               | <b>TvSS-28</b>                                         | 956.4 <sup>+2</sup> | <b>MH-<br/>H<sub>2</sub>O<sup>+2</sup></b> | 1323.5 | <b>y<sub>9</sub>-NH<sub>3</sub></b>         |
| 175.1               | <b>y<sub>1</sub></b>                             | 411.2 | <b>SSTY-<br/>28</b>                 | 691.4               | <b>b<sub>5</sub></b>                                   | 956.9 <sup>+2</sup> | <b>MH-<br/>NH<sub>3</sub><sup>+2</sup></b> | 1338.6 | <b>SITTvS<br/>SSTY-<br/>28</b>              |
| 183.1               | <b>LS-H<sub>2</sub>O</b>                         | 415.3 | <b>LSIT</b>                         | 696.3               | <b>TvSS-<br/>H<sub>2</sub>O</b>                        | 964.4               | <b>vSSSTY</b>                              | 1340.6 | <b>y<sub>9</sub></b>                        |
| 183.1               | <b>SI-H<sub>2</sub>O</b>                         | 421.2 | <b>SSTY-<br/>H<sub>2</sub>O</b>     | 700.3               | <b>vSSS</b>                                            | 965.4 <sup>+2</sup> | <b>MH<sup>+2</sup></b>                     | 1348.6 | <b>SITTvS<br/>SSTY-<br/>H<sub>2</sub>O</b>  |
| 185.1               | <b>TT-H<sub>2</sub>O</b>                         | 421.2 | <b>y<sub>3</sub>-H<sub>2</sub>O</b> | 700.3               | <b>TTvS-28</b>                                         | 975.4               | <b>TTvSSS<br/>T-28</b>                     | 1366.6 | <b>SITTvS<br/>SSTY</b>                      |
| 187.1               | <b>IT-28</b>                                     | 422.2 | <b>y<sub>3</sub>-NH<sub>3</sub></b> | 700.3               | <b>y<sub>6</sub></b>                                   | 985.4               | <b>TTvSSS<br/>T-H<sub>2</sub>O</b>         | 1376.6 | <b>a<sub>9</sub></b>                        |
| 189.1               | <b>ST</b>                                        | 439.2 | <b>SSTY</b>                         | 710.3               | <b>TTvS-<br/>H<sub>2</sub>O</b>                        | 987.4               | <b>SITTvS<br/>S-28</b>                     | 1386.6 | <b>b<sub>9</sub>-H<sub>2</sub>O</b>         |
| 197.1               | <b>IT-H<sub>2</sub>O</b>                         | 439.2 | <b>y<sub>3</sub></b>                | 714.3               | <b>TvSS</b>                                            | 987.4               | <b>ITTVSS<br/>S-28</b>                     | 1404.6 | <b>b<sub>9</sub></b>                        |
| 201.1               | <b>SI</b>                                        | 449.2 | <b>a<sub>3</sub></b>                | 718.3 <sup>+2</sup> | <b>y<sub>10</sub>-<br/>H<sub>2</sub>O<sup>+2</sup></b> | 997.4               | <b>SITTvS<br/>S-H<sub>2</sub>O</b>         | 1435.6 | <b>y<sub>10</sub>-H<sub>2</sub>O</b>        |
| 201.1               | <b>LS</b>                                        | 459.2 | <b>b<sub>3</sub>-H<sub>2</sub>O</b> | 718.8 <sup>+2</sup> | <b>y<sub>10</sub>-<br/>NH<sub>3</sub><sup>+2</sup></b> | 997.4               | <b>ITTVSS<br/>S-H<sub>2</sub>O</b>         | 1436.6 | <b>y<sub>10</sub>-NH<sub>3</sub></b>        |
| 203.1               | <b>TT</b>                                        | 477.2 | <b>b<sub>3</sub></b>                | 726.3               | <b>ITTV-28</b>                                         | 1003.4              | <b>TTvSSS<br/>T</b>                        | 1451.7 | <b>LSITTv<br/>SSSTY-<br/>28</b>             |
| 211.1 <sup>+2</sup> | <b>y<sub>3</sub>-H<sub>2</sub>O<sup>+2</sup></b> | 488.3 | <b>LSITT-<br/>28</b>                | 727.3 <sup>+2</sup> | <b>y<sub>10</sub><sup>+2</sup></b>                     | 1013.5              | <b>LSITTv<br/>S-28</b>                     | 1453.7 | <b>y<sub>10</sub></b>                       |
| 211.6 <sup>+2</sup> | <b>y<sub>3</sub>-NH<sub>3</sub><sup>+2</sup></b> | 498.2 | <b>vS-28</b>                        | 728.3               | <b>TTvS</b>                                            | 1015.4              | <b>SITTvS<br/>S</b>                        | 1461.6 | <b>LSITTv<br/>SSSTY-<br/>H<sub>2</sub>O</b> |
| 215.1               | <b>IT</b>                                        | 498.2 | <b>SSSTY-<br/>28</b>                | 736.3               | <b>ITTV-<br/>H<sub>2</sub>O</b>                        | 1015.4              | <b>ITTVSS<br/>S</b>                        | 1463.6 | <b>a<sub>10</sub></b>                       |
| 220.1 <sup>+2</sup> | <b>y<sub>3</sub><sup>+2</sup></b>                | 498.3 | <b>LSITT-<br/>H<sub>2</sub>O</b>    | 754.3               | <b>ITTV</b>                                            | 1023.5              | <b>LSITTv<br/>S-H<sub>2</sub>O</b>         | 1473.6 | <b>b<sub>10</sub>-H<sub>2</sub>O</b>        |
| 234.1               | <b>SSS-28</b>                                    | 508.2 | <b>vS-H<sub>2</sub>O</b>            | 761.8 <sup>+2</sup> | <b>y<sub>11</sub>-<br/>H<sub>2</sub>O<sup>+2</sup></b> | 1037.4              | <b>TvSSST<br/>Y-28</b>                     | 1479.7 | <b>LSITTv<br/>SSSTY</b>                     |
| 237.1               | <b>TY-28</b>                                     | 508.2 | <b>SSSTY-<br/>H<sub>2</sub>O</b>    | 762.3 <sup>+2</sup> | <b>y<sub>11</sub>-<br/>NH<sub>3</sub><sup>+2</sup></b> | 1041.5              | <b>LSITTv<br/>S</b>                        | 1491.6 | <b>b<sub>10</sub></b>                       |
| 244.1               | <b>SSS-<br/>H<sub>2</sub>O</b>                   | 508.3 | <b>y<sub>4</sub>-H<sub>2</sub>O</b> | 764.4               | <b>a<sub>6</sub></b>                                   | 1047.4              | <b>TvSSST<br/>Y-H<sub>2</sub>O</b>         | 1522.7 | <b>y<sub>11</sub>-H<sub>2</sub>O</b>        |
| 247.1               | <b>TY-H<sub>2</sub>O</b>                         | 509.2 | <b>y<sub>4</sub>-NH<sub>3</sub></b> | 770.9 <sup>+2</sup> | <b>y<sub>11</sub><sup>+2</sup></b>                     | 1065.4              | <b>TvSSST<br/>Y</b>                        | 1523.7 | <b>y<sub>11</sub>-NH<sub>3</sub></b>        |
| 248.1               | <b>SST-28</b>                                    | 512.2 | <b>Tv-28</b>                        | 773.3               | <b>vSSST-<br/>28</b>                                   | 1074.5              | <b>SITTvS<br/>SS-28</b>                    | 1540.7 | <b>y<sub>11</sub></b>                       |

|                     |                                                  |                     |                                                  |                     |                                                   |        |                                     |        |                                      |
|---------------------|--------------------------------------------------|---------------------|--------------------------------------------------|---------------------|---------------------------------------------------|--------|-------------------------------------|--------|--------------------------------------|
| 254.6 <sup>+2</sup> | <b>y<sub>4</sub>-H<sub>2</sub>O<sup>+2</sup></b> | 516.3               | <b>LSITT</b>                                     | 773.3               | <b>TvSSS-28</b>                                   | 1084.5 | <b>SITTVS<br/>SS-H<sub>2</sub>O</b> | 1564.7 | <b>a<sub>11</sub></b>                |
| 255.1 <sup>+2</sup> | <b>y<sub>4</sub>-NH<sub>3</sub><sup>+2</sup></b> | 522.2               | <b>Tv-H<sub>2</sub>O</b>                         | 774.4               | <b>b<sub>6</sub>-H<sub>2</sub>O</b>               | 1088.5 | <b>ITTVSS<br/>ST-28</b>             | 1574.7 | <b>b<sub>11</sub>-H<sub>2</sub>O</b> |
| 258.1               | <b>SST-H<sub>2</sub>O</b>                        | 526.2               | <b>vS</b>                                        | 783.3               | <b>vSSST-H<sub>2</sub>O</b>                       | 1098.5 | <b>ITTVSS<br/>ST-H<sub>2</sub>O</b> | 1592.7 | <b>b<sub>11</sub></b>                |
| 262.1               | <b>SSS</b>                                       | 526.2               | <b>SSSTY</b>                                     | 783.3               | <b>TvSSS-H<sub>2</sub>O</b>                       | 1100.5 | <b>LSITTV<br/>SS-28</b>             | 1635.8 | <b>y<sub>12</sub>-H<sub>2</sub>O</b> |
| 263.6 <sup>+2</sup> | <b>y<sub>4</sub><sup>+2</sup></b>                | 526.3               | <b>y<sub>4</sub></b>                             | 787.3               | <b>TTvSS-28</b>                                   | 1102.5 | <b>SITTVS<br/>SS</b>                | 1636.7 | <b>y<sub>12</sub>-NH<sub>3</sub></b> |
| 265.1               | <b>TY</b>                                        | 540.2               | <b>Tv</b>                                        | 792.4               | <b>b<sub>6</sub></b>                              | 1110.5 | <b>LSITTV<br/>SS-H<sub>2</sub>O</b> | 1653.8 | <b>y<sub>12</sub></b>                |
| 274.2               | <b>SIT-28</b>                                    | 560.7 <sup>+2</sup> | <b>y<sub>7</sub>-H<sub>2</sub>O<sup>+2</sup></b> | 797.3               | <b>TTvSS-H<sub>2</sub>O</b>                       | 1116.5 | <b>ITTVSS<br/>ST</b>                | 1727.8 | <b>a<sub>12</sub></b>                |
| 276.1               | <b>SST</b>                                       | 561.2 <sup>+2</sup> | <b>y<sub>7</sub>-NH<sub>3</sub><sup>+2</sup></b> | 801.3               | <b>vSSST</b>                                      | 1120.5 | <b>y<sub>7</sub>-H<sub>2</sub>O</b> | 1737.7 | <b>b<sub>12</sub>-H<sub>2</sub>O</b> |
| 284.2               | <b>SIT-H<sub>2</sub>O</b>                        | 562.3               | <b>a<sub>4</sub></b>                             | 801.3               | <b>TvSSS</b>                                      | 1121.4 | <b>y<sub>7</sub>-NH<sub>3</sub></b> | 1755.8 | <b>b<sub>12</sub></b>                |
| 286.2               | <b>LSI-28</b>                                    | 569.7 <sup>+2</sup> | <b>y<sub>7</sub><sup>+2</sup></b>                | 813.4               | <b>SITTV-28</b>                                   | 1128.5 | <b>LSITTV<br/>SS</b>                | 1911.9 | <b>MH-H<sub>2</sub>O</b>             |
| 288.2               | <b>ITT-28</b>                                    | 572.3               | <b>b<sub>4</sub>-H<sub>2</sub>O</b>              | 813.4               | <b>ITTVS-28</b>                                   | 1138.5 | <b>TTvSSS<br/>TY-28</b>             | 1912.8 | <b>MH-NH<sub>3</sub></b>             |
| 296.2               | <b>LSI-H<sub>2</sub>O</b>                        | 585.2               | <b>vSS-28</b>                                    | 815.3               | <b>TTvSS</b>                                      | 1138.5 | <b>y<sub>7</sub></b>                | 1929.9 | <b>MH</b>                            |
| 298.2 <sup>+2</sup> | <b>y<sub>5</sub>-H<sub>2</sub>O<sup>+2</sup></b> | 590.3               | <b>b<sub>4</sub></b>                             | 818.4 <sup>+2</sup> | <b>y<sub>12</sub>-H<sub>2</sub>O<sup>+2</sup></b> | 1148.4 | <b>TTvSSSTY-H<sub>2</sub>O</b>      |        |                                      |
| 298.2               | <b>ITT-H<sub>2</sub>O</b>                        | 595.2               | <b>vSS-H<sub>2</sub>O</b>                        | 818.9 <sup>+2</sup> | <b>y<sub>12</sub>-NH<sub>3</sub><sup>+2</sup></b> | 1166.5 | <b>TTvSSS<br/>TY</b>                |        |                                      |
| 298.6 <sup>+2</sup> | <b>y<sub>5</sub>-NH<sub>3</sub><sup>+2</sup></b> | 595.3               | <b>y<sub>5</sub>-H<sub>2</sub>O</b>              | 823.4               | <b>SITTV-H<sub>2</sub>O</b>                       | 1175.5 | <b>SITTVSSST-28</b>                 |        |                                      |

## TIISGNITNK

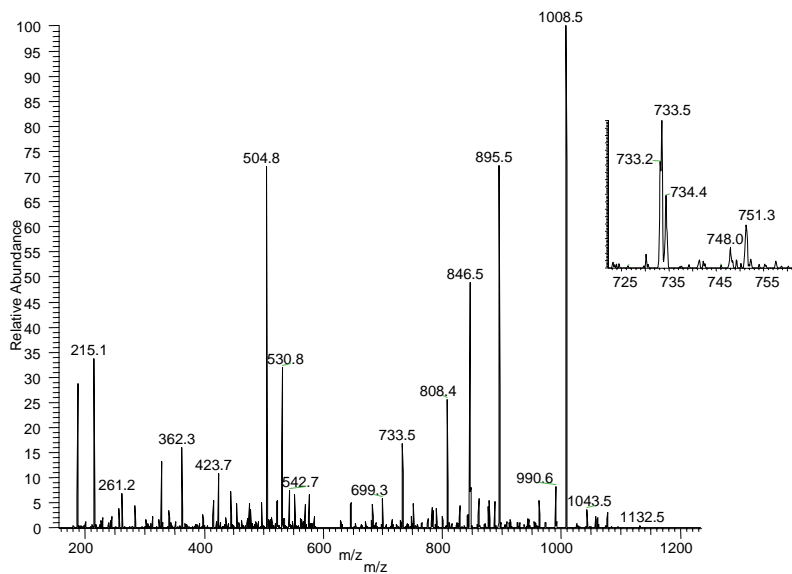

|                    |                                                  |                     |                                                  |                     |                                   |                     |                                       |       |                                     |
|--------------------|--------------------------------------------------|---------------------|--------------------------------------------------|---------------------|-----------------------------------|---------------------|---------------------------------------|-------|-------------------------------------|
| 60.0               | <b>S</b>                                         | 229.6 <sup>+2</sup> | <b>y<sub>4</sub>-NH<sub>3</sub><sup>+2</sup></b> | 404.7 <sup>+2</sup> | <b>y<sub>6</sub><sup>+2</sup></b> | 603.3 <sup>+2</sup> | <b>MH-NH<sub>3</sub><sup>+2</sup></b> | 833.5 | <b>IISGuIT-28</b>                   |
| 65.6 <sup>+2</sup> | <b>y<sub>1</sub>-NH<sub>3</sub><sup>+2</sup></b> | 230.1               | <b>ISG-28</b>                                    | 415.3               | <b>b<sub>4</sub></b>              | 605.3               | <b>uITN</b>                           | 834.4 | <b>ISGuITN-28</b>                   |
| 74.1               | <b>T</b>                                         | 238.2 <sup>+2</sup> | <b>y<sub>4</sub><sup>+2</sup></b>                | 419.2               | <b>Gul-28</b>                     | 607.3               | <b>SGuIT-</b>                         | 843.4 | <b>b<sub>7</sub>-H<sub>2</sub>O</b> |

|                     |                                                  |                     |                                                  |                     |                                                  |                     |                                     |        |                                     |
|---------------------|--------------------------------------------------|---------------------|--------------------------------------------------|---------------------|--------------------------------------------------|---------------------|-------------------------------------|--------|-------------------------------------|
|                     |                                                  |                     |                                                  |                     |                                                  |                     | <b>28</b>                           |        |                                     |
| 74.1 <sup>+2</sup>  | <b>y<sub>1</sub><sup>+2</sup></b>                | 240.1               | <b>ISG-H<sub>2</sub>O</b>                        | 421.2               | <b>SGu</b>                                       | 611.8 <sup>+2</sup> | <b>MH<sup>+2</sup></b>              | 843.4  | <b>IISGuIT-H<sub>2</sub>O</b>       |
| 84.1                | <b>K</b>                                         | 244.1               | <b>y<sub>2</sub>-NH<sub>3</sub></b>              | 439.2 <sup>+2</sup> | <b>y<sub>7</sub>-H<sub>2</sub>O<sup>+2</sup></b> | 617.3               | <b>SGuIT-H<sub>2</sub>O</b>         | 844.4  | <b>ISGuITN-H<sub>2</sub>O</b>       |
| 86.1                | <b>I</b>                                         | 258.1               | <b>ISG</b>                                       | 439.7 <sup>+2</sup> | <b>y<sub>7</sub>-NH<sub>3</sub><sup>+2</sup></b> | 619.3               | <b>IISGu-28</b>                     | 845.4  | <b>ISGuITN-NH<sub>3</sub></b>       |
| 87.1                | <b>N</b>                                         | 261.2               | <b>y<sub>2</sub></b>                             | 444.3               | <b>a<sub>5</sub></b>                             | 619.3               | <b>ISGuIT-28</b>                    | 861.5  | <b>IISGuIT</b>                      |
| 101.1               | <b>K</b>                                         | 286.2               | <b>IIS-28</b>                                    | 447.2               | <b>Gul</b>                                       | 629.3               | <b>IISGu-H<sub>2</sub>O</b>         | 861.5  | <b>b<sub>7</sub></b>                |
| 117.1               | <b>SG-28</b>                                     | 296.2               | <b>IIS-H<sub>2</sub>O</b>                        | 448.2 <sup>+2</sup> | <b>y<sub>7</sub><sup>+2</sup></b>                | 629.3               | <b>ISGuIT-H<sub>2</sub>O</b>        | 862.4  | <b>ISGuITN</b>                      |
| 122.6 <sup>+2</sup> | <b>y<sub>2</sub>-NH<sub>3</sub><sup>+2</sup></b> | 300.2               | <b>a<sub>3</sub></b>                             | 454.3               | <b>b<sub>5</sub>-H<sub>2</sub>O</b>              | 634.3               | <b>GulITN-28</b>                    | 877.4  | <b>y<sub>7</sub>-H<sub>2</sub>O</b> |
| 126.1               | <b>K</b>                                         | 301.2               | <b>ITN-28</b>                                    | 457.3               | <b>y<sub>4</sub>-H<sub>2</sub>O</b>              | 635.3               | <b>SGuIT</b>                        | 878.4  | <b>y<sub>7</sub>-NH<sub>3</sub></b> |
| 127.1               | <b>SG-H<sub>2</sub>O</b>                         | 306.1               | <b>Gu-28</b>                                     | 458.3               | <b>y<sub>4</sub>-NH<sub>3</sub></b>              | 644.3               | <b>GulITN-H<sub>2</sub>O</b>        | 895.4  | <b>y<sub>7</sub></b>                |
| 129.1               | <b>K</b>                                         | 310.2               | <b>b<sub>3</sub>-H<sub>2</sub>O</b>              | 463.2               | <b>ulIT-28</b>                                   | 645.3               | <b>GulITN-NH<sub>3</sub></b>        | 934.5  | <b>a<sub>8</sub></b>                |
| 130.1               | <b>y<sub>1</sub>-NH<sub>3</sub></b>              | 311.2               | <b>ITN-H<sub>2</sub>O</b>                        | 472.3               | <b>b<sub>5</sub></b>                             | 647.3               | <b>IISGu</b>                        | 944.5  | <b>b<sub>8</sub>-H<sub>2</sub>O</b> |
| 131.1 <sup>+2</sup> | <b>y<sub>2</sub><sup>+2</sup></b>                | 312.2               | <b>ITN-NH<sub>3</sub></b>                        | 473.2               | <b>ulIT-H<sub>2</sub>O</b>                       | 647.3               | <b>ISGuIT</b>                       | 947.5  | <b>IISGuITN-28</b>                  |
| 145.1               | <b>SG</b>                                        | 314.2               | <b>IIS</b>                                       | 475.3               | <b>y<sub>4</sub></b>                             | 662.3               | <b>GulITN</b>                       | 957.5  | <b>IISGuITN-H<sub>2</sub>O</b>      |
| 147.1               | <b>y<sub>1</sub></b>                             | 328.2               | <b>b<sub>3</sub></b>                             | 491.2               | <b>ulIT</b>                                      | 720.4               | <b>a<sub>6</sub></b>                | 958.5  | <b>IISGuITN-NH<sub>3</sub></b>      |
| 172.6 <sup>+2</sup> | <b>y<sub>3</sub>-H<sub>2</sub>O<sup>+2</sup></b> | 329.2               | <b>ITN</b>                                       | 495.8 <sup>+2</sup> | <b>y<sub>8</sub>-H<sub>2</sub>O<sup>+2</sup></b> | 720.4               | <b>ISGuIT-28</b>                    | 962.5  | <b>b<sub>8</sub></b>                |
| 173.1 <sup>+2</sup> | <b>y<sub>3</sub>-NH<sub>3</sub><sup>+2</sup></b> | 334.1               | <b>Gu</b>                                        | 496.3 <sup>+2</sup> | <b>y<sub>8</sub>-NH<sub>3</sub><sup>+2</sup></b> | 721.3               | <b>SGuITN-28</b>                    | 975.5  | <b>IISGuITN</b>                     |
| 173.1               | <b>IS-28</b>                                     | 343.2               | <b>IISG-28</b>                                   | 504.8 <sup>+2</sup> | <b>y<sub>8</sub><sup>+2</sup></b>                | 730.4               | <b>b<sub>6</sub>-H<sub>2</sub>O</b> | 990.5  | <b>y<sub>8</sub>-H<sub>2</sub>O</b> |
| 181.6 <sup>+2</sup> | <b>y<sub>3</sub><sup>+2</sup></b>                | 344.2               | <b>y<sub>3</sub>-H<sub>2</sub>O</b>              | 506.2               | <b>ISGu-28</b>                                   | 730.4               | <b>ISGuIT-H<sub>2</sub>O</b>        | 991.5  | <b>y<sub>8</sub>-NH<sub>3</sub></b> |
| 183.1               | <b>IS-H<sub>2</sub>O</b>                         | 345.2               | <b>y<sub>3</sub>-NH<sub>3</sub></b>              | 506.2               | <b>SGul-28</b>                                   | 731.3               | <b>SGuITN-H<sub>2</sub>O</b>        | 1008.5 | <b>y<sub>8</sub></b>                |
| 187.1               | <b>a<sub>2</sub></b>                             | 353.2               | <b>IISG-H<sub>2</sub>O</b>                       | 516.2               | <b>ISGu-H<sub>2</sub>O</b>                       | 732.3               | <b>SGuITN-NH<sub>3</sub></b>        | 1031.5 | <b>a<sub>9</sub>-NH<sub>3</sub></b> |
| 187.1               | <b>IT-28</b>                                     | 362.2               | <b>ul-28</b>                                     | 516.2               | <b>SGul-H<sub>2</sub>O</b>                       | 732.4               | <b>IISGuIT-28</b>                   | 1048.6 | <b>a<sub>9</sub></b>                |
| 188.1               | <b>TN-28</b>                                     | 362.2               | <b>y<sub>3</sub></b>                             | 520.3               | <b>GulIT-28</b>                                  | 733.4               | <b>y<sub>5</sub>-H<sub>2</sub>O</b> | 1058.5 | <b>b<sub>9</sub>-H<sub>2</sub>O</b> |
| 197.1               | <b>b<sub>2</sub>-H<sub>2</sub>O</b>              | 367.2 <sup>+2</sup> | <b>y<sub>5</sub>-H<sub>2</sub>O<sup>+2</sup></b> | 530.2               | <b>GulIT-H<sub>2</sub>O</b>                      | 734.4               | <b>y<sub>5</sub>-NH<sub>3</sub></b> | 1059.5 | <b>b<sub>9</sub>-NH<sub>3</sub></b> |
| 197.1               | <b>IT-H<sub>2</sub>O</b>                         | 367.7 <sup>+2</sup> | <b>y<sub>5</sub>-NH<sub>3</sub><sup>+2</sup></b> | 534.2               | <b>ISGu</b>                                      | 742.4               | <b>IISGuIT-H<sub>2</sub>O</b>       | 1076.5 | <b>b<sub>9</sub></b>                |
| 198.1               | <b>TN-H<sub>2</sub>O</b>                         | 371.2               | <b>IISG</b>                                      | 534.2               | <b>SGul</b>                                      | 748.4               | <b>b<sub>6</sub></b>                | 1103.6 | <b>y<sub>9</sub>-H<sub>2</sub>O</b> |
| 199.1               | <b>TN-NH<sub>3</sub></b>                         | 376.2 <sup>+2</sup> | <b>y<sub>5</sub><sup>+2</sup></b>                | 548.3               | <b>GulIT</b>                                     | 748.4               | <b>ISGuIT</b>                       | 1104.6 | <b>y<sub>9</sub>-NH<sub>3</sub></b> |
| 199.2               | <b>II-28</b>                                     | 387.3               | <b>a<sub>4</sub></b>                             | 552.3 <sup>+2</sup> | <b>y<sub>9</sub>-H<sub>2</sub>O<sup>+2</sup></b> | 749.3               | <b>SGuITN</b>                       | 1121.6 | <b>y<sub>9</sub></b>                |
| 201.1               | <b>IS</b>                                        | 390.2               | <b>ul</b>                                        | 552.8 <sup>+2</sup> | <b>y<sub>9</sub>-NH<sub>3</sub><sup>+2</sup></b> | 751.4               | <b>y<sub>5</sub></b>                | 1204.6 | <b>MH-H<sub>2</sub>O</b>            |
| 215.1               | <b>b<sub>2</sub></b>                             | 393.2               | <b>SGu-28</b>                                    | 561.3 <sup>+2</sup> | <b>y<sub>9</sub><sup>+2</sup></b>                | 760.4               | <b>IISGuIT</b>                      | 1205.6 | <b>MH-NH<sub>3</sub></b>            |
| 215.1               | <b>IT</b>                                        | 395.7 <sup>+2</sup> | <b>y<sub>6</sub>-H<sub>2</sub>O<sup>+2</sup></b> | 577.3               | <b>ulITN-28</b>                                  | 790.4               | <b>y<sub>6</sub>-H<sub>2</sub>O</b> | 1222.7 | <b>MH</b>                           |
| 216.1               | <b>TN</b>                                        | 396.2 <sup>+2</sup> | <b>y<sub>6</sub>-NH<sub>3</sub><sup>+2</sup></b> | 587.3               | <b>ulITN-H<sub>2</sub>O</b>                      | 791.4               | <b>y<sub>6</sub>-NH<sub>3</sub></b> |        |                                     |

|                     |                                                  |       |                                     |                     |                                       |       |                      |
|---------------------|--------------------------------------------------|-------|-------------------------------------|---------------------|---------------------------------------|-------|----------------------|
| 227.2               | <b>II</b>                                        | 397.2 | <b>b<sub>4</sub>-H<sub>2</sub>O</b> | 588.3               | <b>uITN-NH<sub>3</sub></b>            | 808.4 | <b>y<sub>6</sub></b> |
| 229.1 <sup>+2</sup> | <b>y<sub>4</sub>-H<sub>2</sub>O<sup>+2</sup></b> | 403.1 | <b>SGu-H<sub>2</sub>O</b>           | 602.8 <sup>+2</sup> | <b>MH-H<sub>2</sub>O<sup>+2</sup></b> | 833.5 | <b>a<sub>7</sub></b> |

# TISSGNITNK

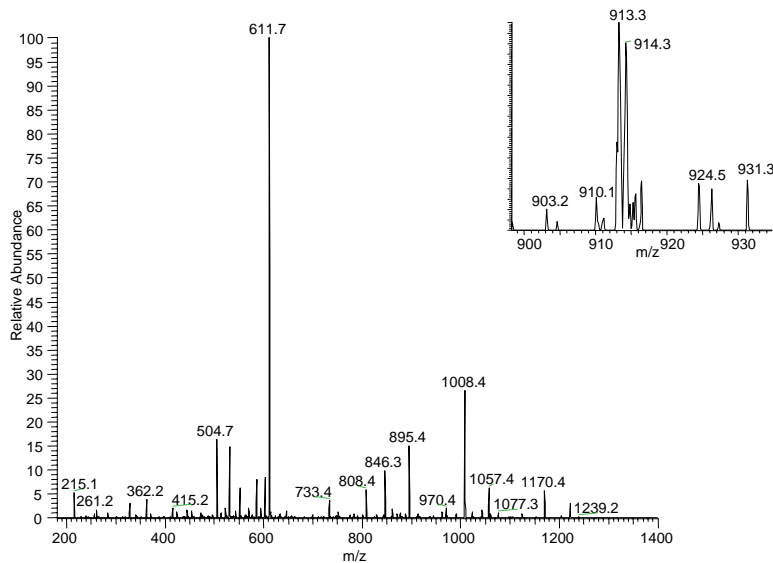

|                     |                                                  |                     |                                                  |                      |                                                  |       |                             |        |                                     |
|---------------------|--------------------------------------------------|---------------------|--------------------------------------------------|----------------------|--------------------------------------------------|-------|-----------------------------|--------|-------------------------------------|
| 60.0                | <b>S</b>                                         | 229.6 <sup>+2</sup> | <b>y<sub>4</sub>-NH<sub>3</sub><sup>+2</sup></b> | 476.7 <sup>+2</sup>  | <b>y<sub>6</sub>-H<sub>2</sub>O<sup>+2</sup></b> | 749.3 | <b>vITN-H<sub>2</sub>O</b>  | 995.5  | <b>a<sub>7</sub></b>                |
| 65.6 <sup>+2</sup>  | <b>y<sub>1</sub>-NH<sub>3</sub><sup>+2</sup></b> | 230.1               | <b>ISG-28</b>                                    | 477.21 <sup>+2</sup> | <b>y<sub>6</sub>-NH<sub>3</sub><sup>+2</sup></b> | 750.3 | <b>vITN-NH<sub>3</sub></b>  | 996.5  | <b>ISGvITN-28</b>                   |
| 74.1                | <b>T</b>                                         | 238.2 <sup>+2</sup> | <b>y<sub>4</sub><sup>+2</sup></b>                | 485.7 <sup>+2</sup>  | <b>y<sub>6</sub><sup>+2</sup></b>                | 767.3 | <b>vITN</b>                 | 1005.5 | <b>IISGvIT-H<sub>2</sub>O</b>       |
| 74.1 <sup>+2</sup>  | <b>y<sub>1</sub><sup>+2</sup></b>                | 240.1               | <b>ISG-H<sub>2</sub>O</b>                        | 496.2                | <b>Gv</b>                                        | 769.3 | <b>SGvIT-28</b>             | 1005.5 | <b>b<sub>7</sub>-H<sub>2</sub>O</b> |
| 84.1                | <b>K</b>                                         | 244.1               | <b>y<sub>2</sub>-NH<sub>3</sub></b>              | 520.2 <sup>+2</sup>  | <b>y<sub>7</sub>-H<sub>2</sub>O<sup>+2</sup></b> | 779.3 | <b>SGvIT-H<sub>2</sub>O</b> | 1006.5 | <b>ISGvITN-H<sub>2</sub>O</b>       |
| 86.1                | <b>I</b>                                         | 258.1               | <b>ISG</b>                                       | 520.7 <sup>+2</sup>  | <b>y<sub>7</sub>-NH<sub>3</sub><sup>+2</sup></b> | 781.4 | <b>ISGvl-28</b>             | 1007.4 | <b>ISGvITN-NH<sub>3</sub></b>       |
| 87.1                | <b>N</b>                                         | 261.2               | <b>y<sub>2</sub></b>                             | 524.2                | <b>vl-28</b>                                     | 781.4 | <b>IISGv-28</b>             | 1023.5 | <b>IISGvIT</b>                      |
| 101.1               | <b>K</b>                                         | 286.2               | <b>IIS-28</b>                                    | 529.3 <sup>+2</sup>  | <b>y<sub>7</sub><sup>+2</sup></b>                | 791.4 | <b>IISGv-H<sub>2</sub>O</b> | 1023.5 | <b>b<sub>7</sub></b>                |
| 117.1               | <b>SG-28</b>                                     | 296.2               | <b>IIS-H<sub>2</sub>O</b>                        | 552.2                | <b>vl</b>                                        | 791.4 | <b>ISGvl-H<sub>2</sub>O</b> | 1024.5 | <b>ISGvITN</b>                      |
| 122.6 <sup>+2</sup> | <b>y<sub>2</sub>-NH<sub>3</sub><sup>+2</sup></b> | 300.2               | <b>a<sub>3</sub></b>                             | 555.2                | <b>SGv-28</b>                                    | 796.4 | <b>GvITN-28</b>             | 1039.5 | <b>y<sub>7</sub>-H<sub>2</sub>O</b> |
| 126.1               | <b>K</b>                                         | 301.2               | <b>ITN-28</b>                                    | 565.2                | <b>SGv-H<sub>2</sub>O</b>                        | 797.3 | <b>SGvIT</b>                | 1040.5 | <b>y<sub>7</sub>-NH<sub>3</sub></b> |
| 127.1               | <b>SG-H<sub>2</sub>O</b>                         | 310.2               | <b>b<sub>3</sub>-H<sub>2</sub>O</b>              | 576.8 <sup>+2</sup>  | <b>y<sub>8</sub>-H<sub>2</sub>O<sup>+2</sup></b> | 806.3 | <b>GvITN-H<sub>2</sub>O</b> | 1057.5 | <b>y<sub>7</sub></b>                |
| 129.1               | <b>K</b>                                         | 311.2               | <b>ITN-H<sub>2</sub>O</b>                        | 577.3 <sup>+2</sup>  | <b>y<sub>8</sub>-NH<sub>3</sub><sup>+2</sup></b> | 807.3 | <b>GvITN-NH<sub>3</sub></b> | 1096.6 | <b>a<sub>8</sub></b>                |
| 130.1               | <b>y<sub>1</sub>-NH<sub>3</sub></b>              | 312.2               | <b>ITN-NH<sub>3</sub></b>                        | 581.3                | <b>Gvl-28</b>                                    | 809.4 | <b>ISGvl</b>                | 1106.5 | <b>b<sub>8</sub>-H<sub>2</sub>O</b> |
| 131.1 <sup>+2</sup> | <b>y<sub>2</sub><sup>+2</sup></b>                | 314.2               | <b>IIS</b>                                       | 583.2                | <b>SGv</b>                                       | 809.4 | <b>IISGv</b>                | 1109.6 | <b>IISGvIT N-28</b>                 |

|                     |                                                  |                     |                                                  |                     |                                                  |       |                                     |        |                                     |
|---------------------|--------------------------------------------------|---------------------|--------------------------------------------------|---------------------|--------------------------------------------------|-------|-------------------------------------|--------|-------------------------------------|
| 145.1               | <b>SG</b>                                        | 328.2               | <b>b<sub>3</sub></b>                             | 585.8 <sup>+2</sup> | <b>y<sub>8</sub><sup>+2</sup></b>                | 824.4 | <b>GvITN</b>                        | 1119.5 | <b>IISGvIT<br/>N-H<sub>2</sub>O</b> |
| 147.1               | <b>y<sub>1</sub></b>                             | 329.2               | <b>ITN</b>                                       | 609.3               | <b>Gvl</b>                                       | 882.4 | <b>ISGvIT-<br/>28</b>               | 1120.5 | <b>IISGvIT<br/>N-NH<sub>3</sub></b> |
| 172.6 <sup>+2</sup> | <b>y<sub>3</sub>-H<sub>2</sub>O<sup>+2</sup></b> | 343.2               | <b>IISG-28</b>                                   | 625.3               | <b>vIT-28</b>                                    | 882.4 | <b>a<sub>6</sub></b>                | 1124.6 | <b>b<sub>8</sub></b>                |
| 173.1 <sup>+2</sup> | <b>y<sub>3</sub>-NH<sub>3</sub><sup>+2</sup></b> | 344.2               | <b>y<sub>3</sub>-H<sub>2</sub>O</b>              | 633.3 <sup>+2</sup> | <b>y<sub>9</sub>-H<sub>2</sub>O<sup>+2</sup></b> | 883.4 | <b>SGvITN-<br/>28</b>               | 1137.6 | <b>IISGvIT<br/>N</b>                |
| 173.1               | <b>IS-28</b>                                     | 345.2               | <b>y<sub>3</sub>-NH<sub>3</sub></b>              | 633.8 <sup>+2</sup> | <b>y<sub>9</sub>-NH<sub>3</sub><sup>+2</sup></b> | 892.4 | <b>ISGvIT-<br/>H<sub>2</sub>O</b>   | 1152.6 | <b>y<sub>8</sub>-H<sub>2</sub>O</b> |
| 181.6 <sup>+2</sup> | <b>y<sub>3</sub><sup>+2</sup></b>                | 353.2               | <b>IISG-<br/>H<sub>2</sub>O</b>                  | 635.3               | <b>vIT-H<sub>2</sub>O</b>                        | 892.4 | <b>b<sub>6</sub>-H<sub>2</sub>O</b> | 1153.5 | <b>y<sub>8</sub>-NH<sub>3</sub></b> |
| 183.1               | <b>IS-H<sub>2</sub>O</b>                         | 362.2               | <b>y<sub>3</sub></b>                             | 642.3 <sup>+2</sup> | <b>y<sub>9</sub><sup>+2</sup></b>                | 893.4 | <b>SGvITN-<br/>H<sub>2</sub>O</b>   | 1170.6 | <b>y<sub>8</sub></b>                |
| 187.1               | <b>IT-28</b>                                     | 371.2               | <b>IISG</b>                                      | 653.3               | <b>vIT</b>                                       | 894.4 | <b>SGvITN-<br/>NH<sub>3</sub></b>   | 1193.6 | <b>a<sub>9</sub>-NH<sub>3</sub></b> |
| 187.1               | <b>a<sub>2</sub></b>                             | 387.3               | <b>a<sub>4</sub></b>                             | 668.3               | <b>ISGv-28</b>                                   | 894.5 | <b>IISGvl-<br/>28</b>               | 1210.6 | <b>a<sub>9</sub></b>                |
| 188.1               | <b>TN-28</b>                                     | 397.2               | <b>b<sub>4</sub>-H<sub>2</sub>O</b>              | 668.3               | <b>SGvl-28</b>                                   | 895.4 | <b>y<sub>5</sub>-H<sub>2</sub>O</b> | 1220.6 | <b>b<sub>9</sub>-H<sub>2</sub>O</b> |
| 197.1               | <b>IT-H<sub>2</sub>O</b>                         | 415.3               | <b>b<sub>4</sub></b>                             | 678.3               | <b>ISGv-<br/>H<sub>2</sub>O</b>                  | 896.4 | <b>y<sub>5</sub>-NH<sub>3</sub></b> | 1221.6 | <b>b<sub>9</sub>-NH<sub>3</sub></b> |
| 197.1               | <b>b<sub>2</sub>-H<sub>2</sub>O</b>              | 444.3               | <b>a<sub>5</sub></b>                             | 678.3               | <b>SGvl-<br/>H<sub>2</sub>O</b>                  | 904.5 | <b>IISGvl-<br/>H<sub>2</sub>O</b>   | 1238.6 | <b>b<sub>9</sub></b>                |
| 198.1               | <b>TN-H<sub>2</sub>O</b>                         | 448.2 <sup>+2</sup> | <b>y<sub>5</sub>-H<sub>2</sub>O<sup>+2</sup></b> | 682.3               | <b>GvIT-28</b>                                   | 910.4 | <b>ISGvIT</b>                       | 1265.6 | <b>y<sub>9</sub>-H<sub>2</sub>O</b> |
| 199.1               | <b>TN-NH<sub>3</sub></b>                         | 448.7 <sup>+2</sup> | <b>y<sub>5</sub>-NH<sub>3</sub><sup>+2</sup></b> | 683.8 <sup>+2</sup> | <b>MH-<br/>H<sub>2</sub>O<sup>+2</sup></b>       | 910.4 | <b>b<sub>6</sub></b>                | 1266.6 | <b>y<sub>9</sub>-NH<sub>3</sub></b> |
| 199.2               | <b>II-28</b>                                     | 454.3               | <b>b<sub>5</sub>-H<sub>2</sub>O</b>              | 684.3 <sup>+2</sup> | <b>MH-<br/>NH<sub>3</sub><sup>+2</sup></b>       | 911.4 | <b>SGvITN</b>                       | 1283.7 | <b>y<sub>9</sub></b>                |
| 201.1               | <b>IS</b>                                        | 457.2 <sup>+2</sup> | <b>y<sub>5</sub><sup>+2</sup></b>                | 692.3               | <b>GvIT-<br/>H<sub>2</sub>O</b>                  | 913.4 | <b>y<sub>5</sub></b>                | 1366.7 | <b>MH-H<sub>2</sub>O</b>            |
| 215.1               | <b>IT</b>                                        | 457.3               | <b>y<sub>4</sub>-H<sub>2</sub>O</b>              | 692.9 <sup>+2</sup> | <b>MH<sup>+2</sup></b>                           | 922.5 | <b>IISGvl</b>                       | 1367.7 | <b>MH-NH<sub>3</sub></b>            |
| 215.1               | <b>b<sub>2</sub></b>                             | 458.3               | <b>y<sub>4</sub>-NH<sub>3</sub></b>              | 696.3               | <b>ISGv</b>                                      | 952.4 | <b>y<sub>6</sub>-H<sub>2</sub>O</b> | 1384.7 | <b>MH</b>                           |
| 216.1               | <b>TN</b>                                        | 468.2               | <b>Gv-28</b>                                     | 696.3               | <b>SGvl</b>                                      | 953.4 | <b>y<sub>6</sub>-NH<sub>3</sub></b> |        |                                     |
| 227.2               | <b>II</b>                                        | 472.3               | <b>b<sub>5</sub></b>                             | 710.3               | <b>GvIT</b>                                      | 970.5 | <b>y<sub>6</sub></b>                |        |                                     |
| 229.1 <sup>+2</sup> | <b>y<sub>4</sub>-H<sub>2</sub>O<sup>+2</sup></b> | 475.3               | <b>y<sub>4</sub></b>                             | 739.3               | <b>vITN-28</b>                                   | 995.5 | <b>IISGvIT-<br/>28</b>              |        |                                     |

# NGDLNITNEGS DTEMQIGGDVVSQK

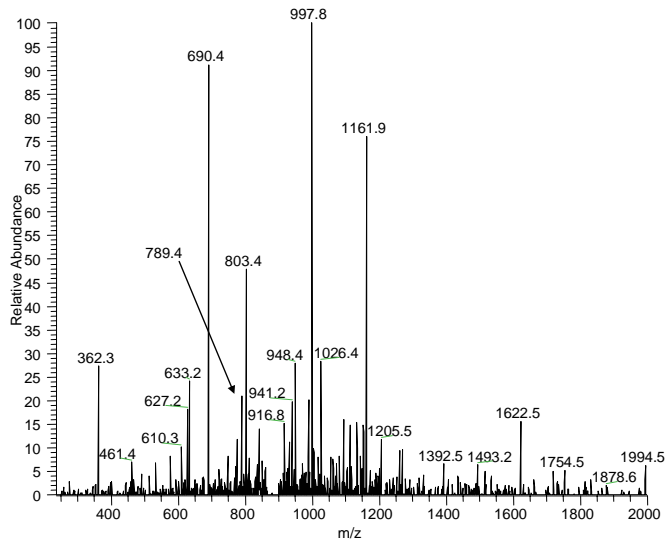

|                    |                                               |                     |                                               |                     |                                  |        |                                       |        |                                               |
|--------------------|-----------------------------------------------|---------------------|-----------------------------------------------|---------------------|----------------------------------|--------|---------------------------------------|--------|-----------------------------------------------|
| 60.0               | <b>S</b>                                      | 457.7 <sup>+2</sup> | y <sub>9</sub> -NH <sub>3</sub> <sup>+2</sup> | 773.3               | uITNEG<br>-H <sub>2</sub> O      | 1115.5 | SDTEM<br>QIGGD<br>V-H <sub>2</sub> O  | 1593.7 | TNEGS<br>DTEMQI<br>GGDVS-<br>28               |
| 65.6 <sup>+2</sup> | y <sub>1</sub> -NH <sub>3</sub> <sup>+2</sup> | 458.2               | ITNE                                          | 774.3               | uITNEG<br>-NH <sub>3</sub>       | 1115.5 | b <sub>9</sub> -H <sub>2</sub> O      | 1594.7 | a <sub>14</sub>                               |
| 72.1               | <b>V</b>                                      | 459.2               | DTEM-<br>H <sub>2</sub> O                     | 775.3               | DTEMQI<br>G                      | 1116.5 | DTEMQI<br>GGDVS-<br>NH <sub>3</sub>   | 1595.7 | uITNEG<br>SDTEM<br>QI                         |
| 74.1               | <b>T</b>                                      | 459.2               | GDVVSQ-<br>28                                 | 776.4 <sup>+2</sup> | y <sub>15</sub> <sup>+2</sup>    | 1116.5 | SDTEM<br>QIGGD<br>V-NH <sub>3</sub>   | 1595.7 | LuITNE<br>GSDTE<br>MQ                         |
| 74.1 <sup>+2</sup> | y <sub>1</sub> <sup>+2</sup>                  | 459.2               | MQIGG-<br>28                                  | 776.4               | GDLuIT                           | 1116.5 | b <sub>9</sub> -NH <sub>3</sub>       | 1603.7 | TNEGS<br>DTEMQI<br>GGDVS-<br>H <sub>2</sub> O |
| 84.1               | <b>Q</b>                                      | 461.2               | TNEGS-<br>28                                  | 777.3               | SDTEM<br>QI-28                   | 1118.5 | TEMQIG<br>GDVVSQ-<br>28               | 1604.6 | TNEGS<br>DTEMQI<br>GGDVS-<br>NH <sub>3</sub>  |
| 84.1               | <b>K</b>                                      | 461.3               | y <sub>4</sub>                                | 785.4               | QIGGD<br>VSQ                     | 1128.5 | TEMQIG<br>GDVVSQ-<br>H <sub>2</sub> O | 1604.7 | b <sub>14</sub> -H <sub>2</sub> O             |
| 86.1               | <b>L</b>                                      | 462.2               | EGSDT-<br>28                                  | 785.4               | y <sub>8</sub> -H <sub>2</sub> O | 1129.5 | TEMQIG<br>GDVVSQ-<br>NH <sub>3</sub>  | 1605.6 | b <sub>14</sub> -NH <sub>3</sub>              |
| 86.1               | <b>I</b>                                      | 462.2               | GSDTE-<br>28                                  | 786.4               | y <sub>8</sub> -NH <sub>3</sub>  | 1133.5 | DTEMQI<br>GGDVS                       | 1611.7 | GDLuIT<br>NEGSD<br>TEM-28                     |
| 87.1               | <b>N</b>                                      | 462.2               | TEMQ-<br>28                                   | 787.3               | SDTEM<br>QI-H <sub>2</sub> O     | 1133.5 | SDTEM<br>QIGGD<br>V                   | 1619.7 | ITNEGS<br>DTEMQI<br>GGDV-<br>28               |

|                            |                                                  |                            |                                   |       |                                          |                      |                                                                   |        |                                                       |
|----------------------------|--------------------------------------------------|----------------------------|-----------------------------------|-------|------------------------------------------|----------------------|-------------------------------------------------------------------|--------|-------------------------------------------------------|
| 87.1                       | <b>GG-28</b>                                     | 463.2                      | <b>uIT-28</b>                     | 788.3 | <b>SDTEM<br/>QI-NH<sub>3</sub></b>       | 1133.5               | <b>b<sub>9</sub></b>                                              | 1620.7 | <b>NEGSD<br/>TEMQIG<br/>GDVSQ-<br/>28</b>             |
| 88.0                       | <b>D</b>                                         | 466.245<br>8 <sup>+2</sup> | <b>y<sub>9</sub><sup>+2</sup></b> | 788.4 | <b>MQIGG<br/>DVS</b>                     | 1134.0 <sup>+2</sup> | <b>y<sub>20</sub><sup>-</sup><br/>H<sub>2</sub>O<sup>+2</sup></b> | 1621.7 | <b>GDLuIT<br/>NEGSD<br/>TEM-<br/>H<sub>2</sub>O</b>   |
| 101.1                      | <b>Q</b>                                         | 469.2                      | <b>GDVSQ-<br/>H<sub>2</sub>O</b>  | 789.4 | <b>b<sub>6</sub></b>                     | 1134.5               | <b>NEGSD<br/>TEMQIG<br/>-28</b>                                   | 1621.7 | <b>TNEGS<br/>DTEMQI<br/>GGDVS</b>                     |
| 101.1                      | <b>K</b>                                         | 470.2                      | <b>GDVSQ-<br/>NH<sub>3</sub></b>  | 790.4 | <b>ITNEGS<br/>DT-28</b>                  | 1134.5 <sup>+2</sup> | <b>y<sub>20</sub><sup>-</sup><br/>NH<sub>3</sub><sup>+2</sup></b> | 1622.6 | <b>GDLuIT<br/>NEGSD<br/>TEM-<br/>NH<sub>3</sub></b>   |
| 102.1                      | <b>E</b>                                         | 470.2                      | <b>MQIGG-<br/>NH<sub>3</sub></b>  | 791.3 | <b>uITNEG</b>                            | 1135.5               | <b>GDLuIT<br/>NEGS-<br/>28</b>                                    | 1622.7 | <b>b<sub>14</sub></b>                                 |
| 104.1                      | <b>M</b>                                         | 471.2                      | <b>TNEGS-<br/>H<sub>2</sub>O</b>  | 800.3 | <b>ITNEGS<br/>DT-H<sub>2</sub>O</b>      | 1143.0 <sup>+2</sup> | <b>y<sub>20</sub><sup>+2</sup></b>                                | 1624.7 | <b>uITNEG<br/>SDTEM<br/>QIG-28</b>                    |
| 115.1                      | <b>GG</b>                                        | 471.2                      | <b>QIGGD</b>                      | 801.3 | <b>ITNEGS<br/>DT-NH<sub>3</sub></b>      | 1144.5               | <b>NEGSD<br/>TEMQIG<br/>-H<sub>2</sub>O</b>                       | 1629.7 | <b>ITNEGS<br/>DTEMQI<br/>GGDV-<br/>H<sub>2</sub>O</b> |
| 117.1                      | <b>GS-28</b>                                     | 472.2                      | <b>GSDTE-<br/>H<sub>2</sub>O</b>  | 802.4 | <b>EMQIG<br/>GDV-28</b>                  | 1145.4               | <b>NEGSD<br/>TEMQIG<br/>-NH<sub>3</sub></b>                       | 1630.7 | <b>NEGSD<br/>TEMQIG<br/>GDVSQ-<br/>H<sub>2</sub>O</b> |
| 126.1                      | <b>K</b>                                         | 472.2                      | <b>EGSDT-<br/>H<sub>2</sub>O</b>  | 803.4 | <b>y<sub>8</sub></b>                     | 1145.5               | <b>GDLuIT<br/>NEGS-<br/>H<sub>2</sub>O</b>                        | 1630.7 | <b>ITNEGS<br/>DTEMQI<br/>GGDV-<br/>NH<sub>3</sub></b> |
| 127.1                      | <b>a<sub>2</sub>-NH<sub>3</sub></b>              | 472.2                      | <b>TNEGS-<br/>NH<sub>3</sub></b>  | 804.4 | <b>DTEMQI<br/>GG-28</b>                  | 1145.5               | <b>a<sub>10</sub>-NH<sub>3</sub></b>                              | 1631.6 | <b>NEGSD<br/>TEMQIG<br/>GDVSQ-<br/>NH<sub>3</sub></b> |
| 127.1                      | <b>GS-H<sub>2</sub>O</b>                         | 472.2                      | <b>TEMQ-<br/>H<sub>2</sub>O</b>   | 804.4 | <b>TEMQIG<br/>GD-28</b>                  | 1146.5               | <b>GDLuIT<br/>NEGS-<br/>NH<sub>3</sub></b>                        | 1634.7 | <b>uITNEG<br/>SDTEM<br/>QIG-<br/>H<sub>2</sub>O</b>   |
| 129.1                      | <b>Q</b>                                         | 473.2                      | <b>TEMQ-<br/>NH<sub>3</sub></b>   | 805.3 | <b>SDTEM<br/>QI</b>                      | 1146.5               | <b>TEMQIG<br/>GDVSQ</b>                                           | 1635.7 | <b>uITNEG<br/>SDTEM<br/>QIG-<br/>NH<sub>3</sub></b>   |
| 129.1                      | <b>K</b>                                         | 473.2                      | <b>uIT-H<sub>2</sub>O</b>         | 805.4 | <b>DLuITN-<br/>28</b>                    | 1162.5               | <b>NEGSD<br/>TEMQIG</b>                                           | 1639.7 | <b>GDLuIT<br/>NEGSD<br/>TEM</b>                       |
| 129.576<br>1 <sup>+2</sup> | <b>y<sub>2</sub>-NH<sub>3</sub><sup>+2</sup></b> | 474.2                      | <b>EMQI-<br/>28</b>               | 806.3 | <b>TNEGS<br/>DTE-28</b>                  | 1162.5               | <b>GSDTE<br/>MQIGG<br/>DV-28</b>                                  | 1647.7 | <b>ITNEGS<br/>DTEMQI<br/>GGDV</b>                     |
| 130.1                      | <b>y<sub>1</sub>-NH<sub>3</sub></b>              | 475.2                      | <b>NEGSD-<br/>28</b>              | 812.4 | <b>EMQIG<br/>GDV-<br/>H<sub>2</sub>O</b> | 1162.5               | <b>a<sub>10</sub></b>                                             | 1648.7 | <b>NEGSD<br/>TEMQIG<br/>GDVSQ</b>                     |
| 138.1 <sup>+2</sup>        | <b>y<sub>2</sub><sup>+2</sup></b>                | 475.3                      | <b>Lul-28</b>                     | 813.3 | <b>EMQIG<br/>GDV-<br/>NH<sub>3</sub></b> | 1163.5               | <b>GDLuIT<br/>NEGS</b>                                            | 1652.7 | <b>uITNEG<br/>SDTEM<br/>QIG</b>                       |



|                     |                                                  |       |                                  |                     |                                                        |        |                                              |        |                                                      |
|---------------------|--------------------------------------------------|-------|----------------------------------|---------------------|--------------------------------------------------------|--------|----------------------------------------------|--------|------------------------------------------------------|
| 143.1               | <b>IG-28</b>                                     | 477.2 | <b>DTEM</b>                      | 814.3               | <b>DTEMQI<br/>GG-H<sub>2</sub>O</b>                    | 1172.5 | <b>GSDTE<br/>MQIGG<br/>DV-H<sub>2</sub>O</b> | 1662.7 | <b>y<sub>16</sub>-H<sub>2</sub>O</b>                 |
| 144.1               | <b>a<sub>2</sub></b>                             | 477.2 | <b>DLu-28</b>                    | 814.3               | <b>TEMQIG<br/>GD-H<sub>2</sub>O</b>                    | 1172.5 | <b>b<sub>10</sub>-H<sub>2</sub>O</b>         | 1663.7 | <b>y<sub>16</sub>-NH<sub>3</sub></b>                 |
| 145.1               | <b>GS</b>                                        | 484.2 | <b>EMQI-<br/>H<sub>2</sub>O</b>  | 815.3               | <b>TEMQIG<br/>GD-NH<sub>3</sub></b>                    | 1173.5 | <b>GSDTE<br/>MQIGG<br/>DV-NH<sub>3</sub></b> | 1680.7 | <b>y<sub>16</sub></b>                                |
| 145.1               | <b>GD-28</b>                                     | 485.2 | <b>NEGSD-<br/>H<sub>2</sub>O</b> | 815.3               | <b>DTEMQI<br/>GG-NH<sub>3</sub></b>                    | 1173.5 | <b>b<sub>10</sub>-NH<sub>3</sub></b>         | 1680.8 | <b>LuITNE<br/>GSDTE<br/>MQI-28</b>                   |
| 147.1               | <b>y<sub>1</sub></b>                             | 485.2 | <b>EMQI-<br/>NH<sub>3</sub></b>  | 815.4               | <b>DLuITN-<br/>H<sub>2</sub>O</b>                      | 1173.6 | <b>y<sub>11</sub>-H<sub>2</sub>O</b>         | 1681.7 | <b>uITNEG<br/>SDTEM<br/>QIGG-<br/>28</b>             |
| 155.0               | <b>b<sub>2</sub>-NH<sub>3</sub></b>              | 486.1 | <b>NEGSD-<br/>NH<sub>3</sub></b> | 816.3               | <b>TNEGS<br/>DTE-<br/>H<sub>2</sub>O</b>               | 1174.5 | <b>y<sub>11</sub>-NH<sub>3</sub></b>         | 1682.7 | <b>DLuITN<br/>EGSDT<br/>EMQ-28</b>                   |
| 155.0               | <b>GD-H<sub>2</sub>O</b>                         | 487.2 | <b>DLu-<br/>H<sub>2</sub>O</b>   | 816.4               | <b>DLuITN-<br/>NH<sub>3</sub></b>                      | 1178.5 | <b>ITNEGS<br/>DTEMQ-<br/>28</b>              | 1690.7 | <b>LuITNE<br/>GSDTE<br/>MQI-<br/>H<sub>2</sub>O</b>  |
| 159.1               | <b>EG-28</b>                                     | 487.2 | <b>GDVSQ</b>                     | 817.3               | <b>TNEGS<br/>DTE-<br/>NH<sub>3</sub></b>               | 1178.5 | <b>TNEGS<br/>DTEMQI<br/>-28</b>              | 1691.7 | <b>uITNEG<br/>SDTEM<br/>QIGG-<br/>H<sub>2</sub>O</b> |
| 159.1               | <b>VS-28</b>                                     | 487.2 | <b>MQIGG</b>                     | 818.4               | <b>ITNEGS<br/>DT</b>                                   | 1179.5 | <b>LuITNE<br/>GSDT-<br/>28</b>               | 1691.7 | <b>LuITNE<br/>GSDTE<br/>MQI-<br/>NH<sub>3</sub></b>  |
| 169.1               | <b>EG-H<sub>2</sub>O</b>                         | 487.3 | <b>ITNEG-<br/>28</b>             | 819.4               | <b>LuITNE-<br/>28</b>                                  | 1188.5 | <b>ITNEGS<br/>DTEMQ-<br/>H<sub>2</sub>O</b>  | 1692.7 | <b>uITNEG<br/>SDTEM<br/>QIGG-<br/>NH<sub>3</sub></b> |
| 169.1               | <b>VS-H<sub>2</sub>O</b>                         | 489.2 | <b>TNEGS</b>                     | 829.4               | <b>LuITNE-<br/>H<sub>2</sub>O</b>                      | 1188.5 | <b>TNEGS<br/>DTEMQI<br/>-H<sub>2</sub>O</b>  | 1692.7 | <b>DLuITN<br/>EGSDT<br/>EMQ-<br/>H<sub>2</sub>O</b>  |
| 171.1               | <b>IG</b>                                        | 490.2 | <b>GSDTE</b>                     | 830.4               | <b>EMQIG<br/>GDV</b>                                   | 1189.5 | <b>TNEGS<br/>DTEMQI<br/>-NH<sub>3</sub></b>  | 1693.7 | <b>DLuITN<br/>EGSDT<br/>EMQ-<br/>NH<sub>3</sub></b>  |
| 172.1               | <b>b<sub>2</sub></b>                             | 490.2 | <b>EGSDT</b>                     | 830.4               | <b>LuITNE-<br/>NH<sub>3</sub></b>                      | 1189.5 | <b>ITNEGS<br/>DTEMQ-<br/>NH<sub>3</sub></b>  | 1706.8 | <b>ITNEGS<br/>DTEMQI<br/>GGDVS-<br/>28</b>           |
| 172.6 <sup>+2</sup> | <b>y<sub>3</sub>-H<sub>2</sub>O<sup>+2</sup></b> | 490.2 | <b>TEMQ</b>                      | 831.9 <sup>+2</sup> | <b>y<sub>16</sub>-<br/>H<sub>2</sub>O<sup>+2</sup></b> | 1189.5 | <b>LuITNE<br/>GSDT-<br/>H<sub>2</sub>O</b>   | 1708.7 | <b>a<sub>15</sub>-NH<sub>3</sub></b>                 |
| 173.1               | <b>GD</b>                                        | 491.2 | <b>uIT</b>                       | 832.4               | <b>TEMQIG<br/>GD</b>                                   | 1190.5 | <b>GSDTE<br/>MQIGG<br/>DV</b>                | 1708.8 | <b>LuITNE<br/>GSDTE<br/>MQI</b>                      |
| 173.1 <sup>+2</sup> | <b>y<sub>3</sub>-NH<sub>3</sub><sup>+2</sup></b> | 497.2 | <b>ITNEG-<br/>H<sub>2</sub>O</b> | 832.4               | <b>DTEMQI<br/>GG</b>                                   | 1190.5 | <b>LuITNE<br/>GSDT-<br/>NH<sub>3</sub></b>   | 1709.7 | <b>uITNEG<br/>SDTEM<br/>QIGG</b>                     |
| 175.1               | <b>SD-28</b>                                     | 498.2 | <b>ITNEG-<br/>NH<sub>3</sub></b> | 832.4 <sup>+2</sup> | <b>y<sub>16</sub>-<br/>NH<sub>3</sub><sup>+2</sup></b> | 1190.5 | <b>b<sub>10</sub></b>                        | 1710.7 | <b>DLuITN<br/>EGSDT<br/>EMQ</b>                      |

|                     |                              |                            |                                                                |                     |                                   |                      |                                                               |        |                                                |
|---------------------|------------------------------|----------------------------|----------------------------------------------------------------|---------------------|-----------------------------------|----------------------|---------------------------------------------------------------|--------|------------------------------------------------|
| 181.6 <sup>+2</sup> | y <sub>3</sub> <sup>+2</sup> | 501.3                      | IGGDVS-28                                                      | 833.4               | DLuITN                            | 1190.6 <sup>+2</sup> | y <sub>21</sub> <sup>-</sup> H <sub>2</sub> O <sup>+2</sup>   | 1716.7 | ITNEGS<br>DTEMQI<br>GGDVS-<br>H <sub>2</sub> O |
| 185.1               | SD-H <sub>2</sub> O          | 502.2                      | EMQI                                                           | 834.3               | TNEGS<br>DTE                      | 1191.0 <sup>+2</sup> | y <sub>21</sub> <sup>-</sup><br>NH <sub>3</sub> <sup>+2</sup> | 1717.7 | ITNEGS<br>DTEMQI<br>GGDVS-<br>NH <sub>3</sub>  |
| 187.1               | EG                           | 503.2                      | NEGSD                                                          | 834.4               | GSDTE<br>MQI-28                   | 1191.5               | NEGSD<br>TEMQIG<br>G-28                                       | 1721.7 | TNEGS<br>DTEMQI<br>GGDVS<br>Q-28               |
| 187.1               | VS                           | 503.3                      | Lul                                                            | 834.4               | SDTEM<br>QIG-28                   | 1191.6               | y <sub>11</sub>                                               | 1725.7 | a <sub>15</sub>                                |
| 187.1               | DV-28                        | 505.2                      | DLu                                                            | 836.3               | NEGSD<br>TEM-28                   | 1192.5               | EGSDT<br>EMQIG<br>GD-28                                       | 1731.7 | TNEGS<br>DTEMQI<br>GGDVS<br>Q-H <sub>2</sub> O |
| 187.1               | IT-28                        | 511.3                      | IGGDVS<br>-H <sub>2</sub> O                                    | 840.9 <sup>+2</sup> | y <sub>16</sub> <sup>+2</sup>     | 1192.5               | SDTEM<br>QIGGD<br>VS-28                                       | 1732.7 | TNEGS<br>DTEMQI<br>GGDVS<br>Q-NH <sub>3</sub>  |
| 188.1               | SQ-28                        | 515.2                      | ITNEG                                                          | 844.4               | GSDTE<br>MQI-<br>H <sub>2</sub> O | 1193.5               | DLuITN<br>EGSD-<br>28                                         | 1734.7 | ITNEGS<br>DTEMQI<br>GGDVS                      |
| 188.1               | TN-28                        | 516.2                      | GGDVS<br>Q-28                                                  | 844.4               | SDTEM<br>QIG-<br>H <sub>2</sub> O | 1195.5               | uITNEG<br>SDTE-<br>28                                         | 1735.7 | b <sub>15</sub> -H <sub>2</sub> O              |
| 189.1               | DT-28                        | 522.8 <sup>+2</sup>        | y <sub>10</sub> <sup>-</sup><br>H <sub>2</sub> O <sup>+2</sup> | 845.3               | GSDTE<br>MQI-<br>NH <sub>3</sub>  | 1199.6 <sup>+2</sup> | y <sub>21</sub> <sup>+2</sup>                                 | 1736.7 | b <sub>15</sub> -NH <sub>3</sub>               |
| 197.1               | DV-H <sub>2</sub> O          | 523.3 <sup>+2</sup>        | y <sub>10</sub> <sup>-</sup><br>NH <sub>3</sub> <sup>+2</sup>  | 845.3               | SDTEM<br>QIG-<br>NH <sub>3</sub>  | 1201.5               | NEGSD<br>TEMQIG<br>G-H <sub>2</sub> O                         | 1737.8 | LuiTNE<br>GSDTE<br>MQIG-<br>28                 |
| 197.1               | IT-H <sub>2</sub> O          | 526.2                      | GGDVS<br>Q-H <sub>2</sub> O                                    | 845.4               | a <sub>7</sub> -NH <sub>3</sub>   | 1202.5               | EGSDT<br>EMQIG<br>GD-H <sub>2</sub> O                         | 1739.7 | GDLuIT<br>NEGSD<br>TEMQ-<br>28                 |
| 198.1               | SQ-H <sub>2</sub> O          | 527.2                      | GGDVS<br>Q-NH <sub>3</sub>                                     | 846.3               | NEGSD<br>TEM-<br>H <sub>2</sub> O | 1202.5               | NEGSD<br>TEMQIG<br>G-NH <sub>3</sub>                          | 1747.8 | LuiTNE<br>GSDTE<br>MQIG-<br>H <sub>2</sub> O   |
| 198.1               | TN-H <sub>2</sub> O          | 529.3                      | IGGDVS                                                         | 847.3               | NEGSD<br>TEM-<br>NH <sub>3</sub>  | 1202.5               | SDTEM<br>QIGGD<br>VS-H <sub>2</sub> O                         | 1748.8 | LuiTNE<br>GSDTE<br>MQIG-<br>NH <sub>3</sub>    |
| 199.1               | SQ-NH <sub>3</sub>           | 531.3                      | EMQIG-<br>28                                                   | 847.4               | LuiTNE                            | 1203.4               | EGSDT<br>EMQIG<br>GD-NH <sub>3</sub>                          | 1749.7 | GDLuIT<br>NEGSD<br>TEMQ-<br>H <sub>2</sub> O   |
| 199.1               | DT-H <sub>2</sub> O          | 531.766<br>0 <sup>+2</sup> | y <sub>10</sub> <sup>+2</sup>                                  | 850.3               | EGSDT<br>EMQ-28                   | 1203.5               | SDTEM<br>QIGGD<br>VS-NH <sub>3</sub>                          | 1749.7 | TNEGS<br>DTEMQI<br>GGDVS<br>Q                  |
| 199.1               | TN-NH <sub>3</sub>           | 534.2                      | GDLu-<br>28                                                    | 850.4               | uITNEG<br>S-28                    | 1203.5               | DLuITN<br>EGSD-<br>H <sub>2</sub> O                           | 1750.7 | GDLuIT<br>NEGSD<br>TEMQ-                       |

|                            |                                                  |       |                                     |       |                                     |        |                                      |        |                                          |
|----------------------------|--------------------------------------------------|-------|-------------------------------------|-------|-------------------------------------|--------|--------------------------------------|--------|------------------------------------------|
|                            |                                                  |       |                                     |       |                                     |        |                                      |        | <b>NH<sub>3</sub></b>                    |
| 200.1                      | <b>IGG-28</b>                                    | 536.2 | <b>SDTEM-28</b>                     | 860.3 | <b>EGSDT EMQ-H<sub>2</sub>O</b>     | 1204.5 | <b>DLuITN EGSD-NH<sub>3</sub></b>    | 1753.7 | <b>b<sub>15</sub></b>                    |
| 201.1                      | <b>DL-28</b>                                     | 541.2 | <b>EMQIG-H<sub>2</sub>O</b>         | 860.4 | <b>uITNEG S-H<sub>2</sub>O</b>      | 1205.5 | <b>uITNEG SDTE-H<sub>2</sub>O</b>    | 1765.8 | <b>LuITNE GSDTE MQIG</b>                 |
| 202.1                      | <b>GGD-28</b>                                    | 542.2 | <b>EMQIG-NH<sub>3</sub></b>         | 861.3 | <b>EGSDT EMQ-NH<sub>3</sub></b>     | 1206.5 | <b>uITNEG SDTE-NH<sub>3</sub></b>    | 1767.7 | <b>GDLuIT NEGSD TEMQ</b>                 |
| 203.1                      | <b>SD</b>                                        | 542.3 | <b>QIGGD V-28</b>                   | 861.3 | <b>uITNEG S-NH<sub>3</sub></b>      | 1206.5 | <b>ITNEGS DTEMQ</b>                  | 1776.8 | <b>y<sub>17</sub>-H<sub>2</sub>O</b>     |
| 203.1                      | <b>TE-28</b>                                     | 544.2 | <b>GDLu-H<sub>2</sub>O</b>          | 862.4 | <b>GSDTE MQI</b>                    | 1206.5 | <b>TNEGS DTEMQI</b>                  | 1777.8 | <b>y<sub>17</sub>-NH<sub>3</sub></b>     |
| 211.1                      | <b>DL-H<sub>2</sub>O</b>                         | 544.2 | <b>GGDVS Q</b>                      | 862.4 | <b>SDTEM QIG</b>                    | 1207.5 | <b>LuITNE GSDT</b>                   | 1794.8 | <b>y<sub>17</sub></b>                    |
| 212.1                      | <b>GGD-H<sub>2</sub>O</b>                        | 546.2 | <b>SDTEM-H<sub>2</sub>O</b>         | 862.4 | <b>a<sub>7</sub></b>                | 1219.5 | <b>NEGSD TEMQIG G</b>                | 1794.8 | <b>LuITNE GSDTE MQIGG-28</b>             |
| 213.1                      | <b>TE-H<sub>2</sub>O</b>                         | 552.3 | <b>QIGGD V-H<sub>2</sub>O</b>       | 862.4 | <b>GDLuIT N-28</b>                  | 1220.5 | <b>EGSDT EMQIG GD</b>                | 1795.8 | <b>DLuITN EGSDT EMQI-28</b>              |
| 214.2                      | <b>QI-28</b>                                     | 553.3 | <b>QIGGD V-NH<sub>3</sub></b>       | 864.3 | <b>NEGSD TEM</b>                    | 1220.5 | <b>SDTEM QIGGD VS</b>                | 1796.7 | <b>uITNEG SDTEM QIGGD-28</b>             |
| 215.1                      | <b>DV</b>                                        | 558.3 | <b>y<sub>5</sub>-H<sub>2</sub>O</b> | 872.4 | <b>b<sub>7</sub>-H<sub>2</sub>O</b> | 1221.5 | <b>DLuITN EGSD</b>                   | 1804.8 | <b>LuITNE GSDTE MQIGG-H<sub>2</sub>O</b> |
| 215.1                      | <b>IT</b>                                        | 559.3 | <b>EMQIG</b>                        | 872.4 | <b>GDLuIT N-H<sub>2</sub>O</b>      | 1223.5 | <b>uITNEG SDTE</b>                   | 1805.8 | <b>DLuITN EGSDT EMQI-H<sub>2</sub>O</b>  |
| 216.1                      | <b>SQ</b>                                        | 559.3 | <b>y<sub>5</sub>-NH<sub>3</sub></b> | 873.4 | <b>b<sub>7</sub>-NH<sub>3</sub></b> | 1232.5 | <b>a<sub>11</sub>-NH<sub>3</sub></b> | 1805.8 | <b>LuITNE GSDTE MQIGG-NH<sub>3</sub></b> |
| 216.1                      | <b>NE-28</b>                                     | 562.2 | <b>GDLu</b>                         | 873.4 | <b>GDLuIT N-NH<sub>3</sub></b>      | 1233.5 | <b>DTEMQI GGDVS Q-28</b>             | 1806.7 | <b>uITNEG SDTEM QIGGD-H<sub>2</sub>O</b> |
| 216.1                      | <b>TN</b>                                        | 564.2 | <b>SDTEM</b>                        | 876.4 | <b>LuITNE G-28</b>                  | 1235.5 | <b>TNEGS DTEMQI G-28</b>             | 1806.8 | <b>DLuITN EGSDT EMQI-NH<sub>3</sub></b>  |
| 217.1                      | <b>DT</b>                                        | 570.3 | <b>QIGGD V</b>                      | 878.3 | <b>EGSDT EMQ</b>                    | 1243.5 | <b>DTEMQI GGDVS Q-H<sub>2</sub>O</b> | 1807.7 | <b>uITNEG SDTEM QIGGD-NH<sub>3</sub></b> |
| 222.134<br>3 <sup>+2</sup> | <b>y<sub>4</sub>-H<sub>2</sub>O<sup>+2</sup></b> | 574.3 | <b>MQIGG D-28</b>                   | 878.4 | <b>uITNEG S</b>                     | 1244.5 | <b>DTEMQI GGDVS Q-NH<sub>3</sub></b> | 1822.8 | <b>LuITNE GSDTE MQIGG</b>                |

|                            |                                                  |       |                                   |                     |                                                                   |                             |                                                                   |        |                                                         |
|----------------------------|--------------------------------------------------|-------|-----------------------------------|---------------------|-------------------------------------------------------------------|-----------------------------|-------------------------------------------------------------------|--------|---------------------------------------------------------|
| 222.6 <sup>+2</sup>        | <b>y<sub>4</sub>-NH<sub>3</sub><sup>+2</sup></b> | 574.3 | <b>ITNEGS<br/>-28</b>             | 886.4               | <b>LuITNE<br/>G-H<sub>2</sub>O</b>                                | 1245.5                      | <b>TNEGS<br/>DTEMQI<br/>G-H<sub>2</sub>O</b>                      | 1823.8 | <b>DLuITN<br/>EGSDT<br/>EMQI</b>                        |
| 225.1                      | <b>QI-NH<sub>3</sub></b>                         | 575.3 | <b>TEMQI-<br/>28</b>              | 887.4               | <b>LuITNE<br/>G-NH<sub>3</sub></b>                                | 1246.5                      | <b>TNEGS<br/>DTEMQI<br/>G-NH<sub>3</sub></b>                      | 1824.7 | <b>uITNEG<br/>SDTEM<br/>QIGGD</b>                       |
| 226.1                      | <b>NE-H<sub>2</sub>O</b>                         | 576.2 | <b>NEGSD<br/>T-28</b>             | 888.4               | <b>MQIGG<br/>DVSQ-<br/>28</b>                                     | 1248.05<br>81 <sup>+2</sup> | <b>y<sub>22</sub><sup>-</sup><br/>H<sub>2</sub>O<sup>+2</sup></b> | 1834.8 | <b>ITNEGS<br/>DTEMQI<br/>GGDVS<br/>Q-28</b>             |
| 227.1                      | <b>NE-NH<sub>3</sub></b>                         | 576.2 | <b>TNEGS<br/>D-28</b>             | 888.9 <sup>+2</sup> | <b>y<sub>17</sub><sup>-</sup><br/>H<sub>2</sub>O<sup>+2</sup></b> | 1248.55<br>01 <sup>+2</sup> | <b>y<sub>22</sub><sup>-</sup><br/>NH<sub>3</sub><sup>+2</sup></b> | 1836.7 | <b>a<sub>16</sub><sup>-</sup>-NH<sub>3</sub></b>        |
| 228.1                      | <b>IGG</b>                                       | 576.3 | <b>y<sub>5</sub></b>              | 889.4 <sup>+2</sup> | <b>y<sub>17</sub><sup>-</sup><br/>NH<sub>3</sub><sup>+2</sup></b> | 1249.5                      | <b>GSDTE<br/>MQIGG<br/>DVS-28</b>                                 | 1844.8 | <b>ITNEGS<br/>DTEMQI<br/>GGDVS<br/>Q-H<sub>2</sub>O</b> |
| 229.1                      | <b>DL</b>                                        | 576.3 | <b>LuIT-28</b>                    | 889.4               | <b>EMQIG<br/>GDVS-<br/>28</b>                                     | 1249.6                      | <b>a<sub>11</sub></b>                                             | 1845.8 | <b>ITNEGS<br/>DTEMQI<br/>GGDVS<br/>Q-NH<sub>3</sub></b> |
| 230.1                      | <b>GGD</b>                                       | 577.2 | <b>DTEMQ-<br/>28</b>              | 890.4               | <b>GDLuIT<br/>N</b>                                               | 1250.5                      | <b>GDLuIT<br/>NEGSD-<br/>28</b>                                   | 1852.8 | <b>GDLuIT<br/>NEGSD<br/>TEMQI-<br/>28</b>               |
| 231.1                      | <b>TE</b>                                        | 577.3 | <b>uITN-28</b>                    | 890.4               | <b>b<sub>7</sub></b>                                              | 1257.1 <sup>+2</sup>        | <b>y<sub>22</sub><sup>+2</sup></b>                                | 1852.8 | <b>DLuITN<br/>EGSDT<br/>EMQIG-<br/>28</b>               |
| 231.139<br>6 <sup>+2</sup> | <b>y<sub>4</sub><sup>+2</sup></b>                | 584.2 | <b>MQIGG<br/>D-H<sub>2</sub>O</b> | 891.4               | <b>GSDTE<br/>MQIG-<br/>28</b>                                     | 1259.5                      | <b>GSDTE<br/>MQIGG<br/>DVS-<br/>H<sub>2</sub>O</b>                | 1853.8 | <b>a<sub>16</sub></b>                                   |
| 232.1                      | <b>GSD-28</b>                                    | 584.3 | <b>ITNEGS<br/>-H<sub>2</sub>O</b> | 891.4               | <b>SDTEM<br/>QIGG-<br/>28</b>                                     | 1259.5                      | <b>b<sub>11</sub>-H<sub>2</sub>O</b>                              | 1862.8 | <b>GDLuIT<br/>NEGSD<br/>TEMQI-<br/>H<sub>2</sub>O</b>   |
| 232.1                      | <b>MQ-28</b>                                     | 585.2 | <b>MQIGG<br/>D-NH<sub>3</sub></b> | 897.9 <sup>+2</sup> | <b>y<sub>17</sub><sup>+2</sup></b>                                | 1260.5                      | <b>GSDTE<br/>MQIGG<br/>DVS-<br/>NH<sub>3</sub></b>                | 1862.8 | <b>DLuITN<br/>EGSDT<br/>EMQIG-<br/>H<sub>2</sub>O</b>   |
| 233.1                      | <b>EM-28</b>                                     | 585.3 | <b>ITNEGS<br/>-NH<sub>3</sub></b> | 898.4               | <b>MQIGG<br/>DVSQ-<br/>H<sub>2</sub>O</b>                         | 1260.5                      | <b>b<sub>11</sub>-NH<sub>3</sub></b>                              | 1862.8 | <b>ITNEGS<br/>DTEMQI<br/>GGDVS<br/>Q</b>                |
| 242.1                      | <b>GSD-<br/>H<sub>2</sub>O</b>                   | 585.3 | <b>TEMQI-<br/>H<sub>2</sub>O</b>  | 899.4               | <b>MQIGG<br/>DVSQ-<br/>NH<sub>3</sub></b>                         | 1260.5                      | <b>GDLuIT<br/>NEGSD-<br/>H<sub>2</sub>O</b>                       | 1863.8 | <b>b<sub>16</sub>-H<sub>2</sub>O</b>                    |
| 242.1                      | <b>a<sub>3</sub>-NH<sub>3</sub></b>              | 586.2 | <b>NEGSD<br/>T-H<sub>2</sub>O</b> | 899.4               | <b>EMQIG<br/>GDVS-<br/>H<sub>2</sub>O</b>                         | 1261.5                      | <b>GDLuIT<br/>NEGSD-<br/>NH<sub>3</sub></b>                       | 1863.8 | <b>GDLuIT<br/>NEGSD<br/>TEMQI-<br/>NH<sub>3</sub></b>   |
| 242.1                      | <b>QI</b>                                        | 586.2 | <b>TNEGS<br/>D-H<sub>2</sub>O</b> | 900.4               | <b>EMQIG<br/>GDVS-<br/>NH<sub>3</sub></b>                         | 1261.5                      | <b>DTEMQI<br/>GGDVS<br/>Q</b>                                     | 1863.8 | <b>DLuITN<br/>EGSDT<br/>EMQIG-<br/>NH<sub>3</sub></b>   |
| 243.1                      | <b>EM-H<sub>2</sub>O</b>                         | 586.3 | <b>TEMQI-<br/>NH<sub>3</sub></b>  | 901.4               | <b>GSDTE<br/>MQIG-<br/>H<sub>2</sub>O</b>                         | 1263.5                      | <b>TNEGS<br/>DTEMQI<br/>G</b>                                     | 1864.7 | <b>b<sub>16</sub><sup>-</sup>-NH<sub>3</sub></b>        |

|       |                                     |                     |                                                               |       |                                     |                         |                                                               |        |                                            |
|-------|-------------------------------------|---------------------|---------------------------------------------------------------|-------|-------------------------------------|-------------------------|---------------------------------------------------------------|--------|--------------------------------------------|
| 243.1 | <b>MQ-NH<sub>3</sub></b>            | 586.3               | <b>LuIT-H<sub>2</sub>O</b>                                    | 901.4 | <b>SDTEM QIGG-H<sub>2</sub>O</b>    | 1274.6                  | <b>y<sub>12</sub>-H<sub>2</sub>O</b>                          | 1877.8 | <b>y<sub>18</sub>-H<sub>2</sub>O</b>       |
| 244.1 | <b>NE</b>                           | 587.2               | <b>NEGSD T-NH<sub>3</sub></b>                                 | 902.4 | <b>GSDTE MQIG-NH<sub>3</sub></b>    | 1275.6                  | <b>y<sub>12</sub>-NH<sub>3</sub></b>                          | 1878.8 | <b>y<sub>18</sub>-NH<sub>3</sub></b>       |
| 244.1 | <b>GDV-28</b>                       | 587.2               | <b>TNEGS D-NH<sub>3</sub></b>                                 | 902.4 | <b>SDTEM QIGG-NH<sub>3</sub></b>    | 1276.6 <sup>+2</sup>    | <b>y<sub>23</sub><sup>-</sup>-H<sub>2</sub>O<sup>+2</sup></b> | 1880.8 | <b>GDLuIT NEGSD TEMQI</b>                  |
| 246.1 | <b>EGS-28</b>                       | 587.2               | <b>DTEMQ-H<sub>2</sub>O</b>                                   | 903.4 | <b>TEMQIG GDV-28</b>                | 1277.1 <sup>+2</sup>    | <b>y<sub>23</sub><sup>-</sup>-NH<sub>3</sub><sup>+2</sup></b> | 1880.8 | <b>DLuITN EGSdT EMQIG</b>                  |
| 254.1 | <b>GDV-H<sub>2</sub>O</b>           | 587.3               | <b>uITN-H<sub>2</sub>O</b>                                    | 904.4 | <b>LuITNE G</b>                     | 1277.5                  | <b>GSDTE MQIGG DVS</b>                                        | 1881.8 | <b>b<sub>16</sub></b>                      |
| 256.1 | <b>EGS-H<sub>2</sub>O</b>           | 587.3 <sup>+2</sup> | <b>y<sub>11</sub><sup>-</sup>-H<sub>2</sub>O<sup>+2</sup></b> | 913.4 | <b>TEMQIG GDV-H<sub>2</sub>O</b>    | 1277.5                  | <b>b<sub>11</sub></b>                                         | 1895.8 | <b>uITNEG SDTEM QIGGD V-28</b>             |
| 258.1 | <b>GDL-28</b>                       | 587.8 <sup>+2</sup> | <b>y<sub>11</sub><sup>-</sup>-NH<sub>3</sub><sup>+2</sup></b> | 913.5 | <b>y<sub>9</sub>-H<sub>2</sub>O</b> | 1278.5                  | <b>GDLuIT NEGSD</b>                                           | 1895.8 | <b>y<sub>18</sub></b>                      |
| 258.1 | <b>y<sub>2</sub>-NH<sub>3</sub></b> | 588.2               | <b>DTEMQ-NH<sub>3</sub></b>                                   | 914.4 | <b>TEMQIG GDV-NH<sub>3</sub></b>    | 1285.5741 <sup>+2</sup> | <b>y<sub>23</sub><sup>+2</sup></b>                            | 1905.8 | <b>uITNEG SDTEM QIGGD V-H<sub>2</sub>O</b> |
| 259.1 | <b>a<sub>3</sub></b>                | 588.3               | <b>uITN-NH<sub>3</sub></b>                                    | 914.5 | <b>y<sub>9</sub>-NH<sub>3</sub></b> | 1291.5                  | <b>EGSDT EMQIG GDV-28</b>                                     | 1906.8 | <b>uITNEG SDTEM QIGGD V-NH<sub>3</sub></b> |
| 260.1 | <b>GSD</b>                          | 588.3               | <b>EMQIG G-28</b>                                             | 916.4 | <b>MQIGG DVSQ</b>                   | 1291.6                  | <b>ITNEGS DTEMQI -28</b>                                      | 1909.8 | <b>GDLuIT NEGSD TEMQIG -28</b>             |
| 260.1 | <b>MQ</b>                           | 590.3               | <b>DLuI-28</b>                                                | 917.4 | <b>EMQIG GDVS</b>                   | 1292.5                  | <b>TNEGS DTEMQI GG-28</b>                                     | 1909.8 | <b>DLuITN EGSdT EMQIG G-28</b>             |
| 261.1 | <b>EM</b>                           | 591.2               | <b>EGSDT E-28</b>                                             | 919.4 | <b>GSDTE MQIG</b>                   | 1292.6                  | <b>y<sub>12</sub></b>                                         | 1909.8 | <b>LuITNE GSDTE MQIGG D-28</b>             |
| 268.1 | <b>GDL-H<sub>2</sub>O</b>           | 593.2               | <b>GSDTE M-28</b>                                             | 919.4 | <b>DTEMQI GGD-28</b>                | 1294.6                  | <b>DLuITN EGSdT-28</b>                                        | 1919.8 | <b>GDLuIT NEGSD TEMQIG -H<sub>2</sub>O</b> |
| 269.1 | <b>b<sub>3</sub>-H<sub>2</sub>O</b> | 596.3 <sup>+2</sup> | <b>y<sub>11</sub><sup>+2</sup></b>                            | 919.4 | <b>SDTEM QIGG</b>                   | 1301.5                  | <b>EGSDT EMQIG GDV-H<sub>2</sub>O</b>                         | 1919.8 | <b>LuITNE GSDTE MQIGG D-H<sub>2</sub>O</b> |
| 270.1 | <b>b<sub>3</sub>-NH<sub>3</sub></b> | 598.3               | <b>EMQIG G-H<sub>2</sub>O</b>                                 | 919.4 | <b>ITNEGS DTE-28</b>                | 1301.6                  | <b>ITNEGS DTEMQI -H<sub>2</sub>O</b>                          | 1919.8 | <b>DLuITN EGSdT EMQIG G-H<sub>2</sub>O</b> |
| 271.2 | <b>QIG-28</b>                       | 599.2               | <b>EMQIG G-NH<sub>3</sub></b>                                 | 929.4 | <b>DTEMQI GGD-H<sub>2</sub>O</b>    | 1302.5                  | <b>EGSDT EMQIG GDV-NH<sub>3</sub></b>                         | 1920.8 | <b>GDLuIT NEGSD TEMQIG -NH<sub>3</sub></b> |

|                     |                                                  |       |                                     |                     |                                                   |        |                                       |        |                                             |
|---------------------|--------------------------------------------------|-------|-------------------------------------|---------------------|---------------------------------------------------|--------|---------------------------------------|--------|---------------------------------------------|
| 272.1               | <b>GDV</b>                                       | 600.3 | <b>DLuI-H<sub>2</sub>O</b>          | 929.4               | <b>ITNEGS DTE-H<sub>2</sub>O</b>                  | 1302.5 | <b>TNEGS DTEMQI GG-H<sub>2</sub>O</b> | 1920.8 | <b>LuITNE GSDTE MQIGG D-NH<sub>3</sub></b>  |
| 273.1               | <b>NEG-28</b>                                    | 601.2 | <b>EGSDT E-H<sub>2</sub>O</b>       | 930.4               | <b>DTEMQI GGD-NH<sub>3</sub></b>                  | 1302.6 | <b>ITNEGS DTEMQI -NH<sub>3</sub></b>  | 1920.8 | <b>DLuITN EGSDT EMQIG G-NH<sub>3</sub></b>  |
| 274.1               | <b>EGS</b>                                       | 602.3 | <b>MQIGG D</b>                      | 930.4               | <b>ITNEGS DTE-NH<sub>3</sub></b>                  | 1303.5 | <b>TNEGS DTEMQI GG-NH<sub>3</sub></b> | 1923.8 | <b>uITNEG SDTEM QIGGD V</b>                 |
| 274.1               | <b>DVS-28</b>                                    | 602.3 | <b>ITNEGS</b>                       | 931.4               | <b>TEMQIG GDV</b>                                 | 1304.5 | <b>DLuITN EGSDT-H<sub>2</sub>O</b>    | 1937.8 | <b>GDLuIT NEGSD TEMQIG</b>                  |
| 275.2               | <b>y<sub>2</sub></b>                             | 603.2 | <b>GSDTE M-H<sub>2</sub>O</b>       | 931.5               | <b>y<sub>9</sub></b>                              | 1305.5 | <b>DLuITN EGSDT-NH<sub>3</sub></b>    | 1937.8 | <b>DLuITN EGSDT EMQIG G</b>                 |
| 276.1               | <b>SDT-28</b>                                    | 603.3 | <b>TEMQI</b>                        | 934.4               | <b>DLuITN E-28</b>                                | 1306.5 | <b>NEGSD TEMQIG GD-28</b>             | 1937.8 | <b>LuITNE GSDTE MQIGG D</b>                 |
| 279.7 <sup>+2</sup> | <b>y<sub>5</sub>-H<sub>2</sub>O<sup>+2</sup></b> | 604.2 | <b>NEGSD T</b>                      | 937.4               | <b>TNEGS DTEM-28</b>                              | 1308.6 | <b>LuITNE GSDTE-28</b>                | 1949.8 | <b>a<sub>17</sub>-NH<sub>3</sub></b>        |
| 280.1 <sup>+2</sup> | <b>y<sub>5</sub>-NH<sub>3</sub><sup>+2</sup></b> | 604.2 | <b>TNEGS D</b>                      | 939.4 <sup>+2</sup> | <b>y<sub>18</sub>-H<sub>2</sub>O<sup>+2</sup></b> | 1316.5 | <b>NEGSD TEMQIG GD-H<sub>2</sub>O</b> | 1966.9 | <b>a<sub>17</sub></b>                       |
| 282.1               | <b>QIG-NH<sub>3</sub></b>                        | 604.3 | <b>LuIT</b>                         | 939.9 <sup>+2</sup> | <b>y<sub>18</sub>-NH<sub>3</sub><sup>+2</sup></b> | 1317.5 | <b>NEGSD TEMQIG GD-NH<sub>3</sub></b> | 1966.9 | <b>GDLuIT NEGSD TEMQIG G-28</b>             |
| 283.1               | <b>NEG-H<sub>2</sub>O</b>                        | 605.2 | <b>DTEMQ</b>                        | 944.4               | <b>DLuITN E-H<sub>2</sub>O</b>                    | 1318.6 | <b>LuITNE GSDTE-H<sub>2</sub>O</b>    | 1976.8 | <b>b<sub>17</sub>-H<sub>2</sub>O</b>        |
| 284.1               | <b>NEG-NH<sub>3</sub></b>                        | 605.3 | <b>uITN</b>                         | 945.4               | <b>DLuITN E-NH<sub>3</sub></b>                    | 1319.5 | <b>EGSDT EMQIG GDV</b>                | 1976.8 | <b>GDLuIT NEGSD TEMQIG G-H<sub>2</sub>O</b> |
| 284.1               | <b>DVS-H<sub>2</sub>O</b>                        | 615.3 | <b>y<sub>6</sub>-H<sub>2</sub>O</b> | 947.3               | <b>TNEGS DTEM-H<sub>2</sub>O</b>                  | 1319.5 | <b>LuITNE GSDTE-NH<sub>3</sub></b>    | 1977.8 | <b>b<sub>17</sub>-NH<sub>3</sub></b>        |
| 286.1               | <b>SDT-H<sub>2</sub>O</b>                        | 616.3 | <b>EMQIG G</b>                      | 947.4               | <b>DTEMQI GGD</b>                                 | 1319.6 | <b>ITNEGS DTEMQI</b>                  | 1977.8 | <b>GDLuIT NEGSD TEMQIG G-NH<sub>3</sub></b> |
| 286.1               | <b>GDL</b>                                       | 616.3 | <b>y<sub>6</sub>-NH<sub>3</sub></b> | 947.4               | <b>ITNEGS DTE</b>                                 | 1320.5 | <b>TNEGS DTEMQI GG</b>                | 1982.8 | <b>uITNEG SDTEM QIGGD VS-28</b>             |
| 287.1               | <b>b<sub>3</sub></b>                             | 618.3 | <b>DLuI</b>                         | 948.3               | <b>TNEGS DTEM-NH<sub>3</sub></b>                  | 1320.6 | <b>SDTEM QIGGD VSQ-28</b>             | 1990.9 | <b>y<sub>19</sub>-H<sub>2</sub>O</b>        |
| 287.2               | <b>VSQ-28</b>                                    | 619.2 | <b>EGSDT E</b>                      | 948.4               | <b>GSDTE MQIGG-28</b>                             | 1322.6 | <b>DLuITN EGSDT</b>                   | 1991.9 | <b>y<sub>19</sub>-NH<sub>3</sub></b>        |

|                            |                                                |                     |                                                     |                     |                                     |                      |                                            |        |                                                 |
|----------------------------|------------------------------------------------|---------------------|-----------------------------------------------------|---------------------|-------------------------------------|----------------------|--------------------------------------------|--------|-------------------------------------------------|
| 288.653<br>0 <sup>+2</sup> | y <sub>5</sub> <sup>+2</sup>                   | 621.2               | GSDTE<br>M                                          | 948.4 <sup>+2</sup> | y <sub>18</sub> <sup>+2</sup>       | 1326.5               | uITNEG<br>SDTEM-<br>28                     | 1992.8 | uITNEG<br>SDTEM<br>QIGGD<br>VS-H <sub>2</sub> O |
| 297.2                      | VSQ-<br>H <sub>2</sub> O                       | 629.3               | IGGDVS<br>Q-28                                      | 958.4               | GSDTE<br>MQIGG-<br>H <sub>2</sub> O | 1330.6               | SDTEM<br>QIGGD<br>VSQ-<br>H <sub>2</sub> O | 1993.8 | uITNEG<br>SDTEM<br>QIGGD<br>VS-NH <sub>3</sub>  |
| 298.1                      | VSQ-<br>NH <sub>3</sub>                        | 629.3               | QIGGD<br>VS-28                                      | 959.4               | GSDTE<br>MQIGG-<br>NH <sub>3</sub>  | 1331.5               | SDTEM<br>QIGGD<br>VSQ-<br>NH <sub>3</sub>  | 1994.8 | b <sub>17</sub>                                 |
| 299.2                      | QIG                                            | 631.3               | a <sub>5</sub> -NH <sub>3</sub>                     | 959.4               | a <sub>8</sub> -NH <sub>3</sub>     | 1333.6 <sup>+2</sup> | MH-<br>H <sub>2</sub> O <sup>+2</sup>      | 1994.8 | GDLuIT<br>NEGSD<br>TEMQIG<br>G                  |
| 301.1                      | NEG                                            | 632.3               | TEMQIG<br>-28                                       | 962.4               | DLuITN<br>E                         | 1334.1 <sup>+2</sup> | MH-<br>NH <sub>3</sub> <sup>+2</sup>       | 2006.8 | a <sub>18</sub> -NH <sub>3</sub>                |
| 301.2                      | GGDV-<br>28                                    | 633.3               | y <sub>6</sub>                                      | 963.4               | EGSDT<br>EMQI-<br>28                | 1334.5               | NEGSD<br>TEMQIG<br>GD                      | 2008.9 | LuITNE<br>GSDTE<br>MQIGG<br>DV-28               |
| 301.2                      | ITN-28                                         | 637.8 <sup>+2</sup> | y <sub>12</sub> -<br>H <sub>2</sub> O <sup>+2</sup> | 963.5               | LuITNE<br>GS-28                     | 1336.5               | uITNEG<br>SDTEM-<br>H <sub>2</sub> O       | 2008.9 | y <sub>19</sub>                                 |
| 302.1                      | DVS                                            | 638.3 <sup>+2</sup> | y <sub>12</sub> -<br>NH <sub>3</sub> <sup>+2</sup>  | 964.4               | NEGSD<br>TEMQ-<br>28                | 1336.6               | LuITNE<br>GSDTE                            | 2010.8 | uITNEG<br>SDTEM<br>QIGGD<br>VS                  |
| 304.1                      | SDT                                            | 639.3               | IGGDVS<br>Q-H <sub>2</sub> O                        | 965.4               | TNEGS<br>DTEM                       | 1337.5               | uITNEG<br>SDTEM-<br>NH <sub>3</sub>        | 2018.9 | LuITNE<br>GSDTE<br>MQIGG<br>DV-H <sub>2</sub> O |
| 308.2 <sup>+2</sup>        | y <sub>6</sub> -H <sub>2</sub> O <sup>+2</sup> | 639.3               | QIGGD<br>VS-H <sub>2</sub> O                        | 965.4               | uITNEG<br>SD-28                     | 1342.6 <sup>+2</sup> | MH <sup>+2</sup>                           | 2019.9 | LuITNE<br>GSDTE<br>MQIGG<br>DV-NH <sub>3</sub>  |
| 308.7 <sup>+2</sup>        | y <sub>6</sub> -NH <sub>3</sub> <sup>+2</sup>  | 640.3               | IGGDVS<br>Q-NH <sub>3</sub>                         | 973.4               | EGSDT<br>EMQI-<br>H <sub>2</sub> O  | 1347.6               | a <sub>12</sub> -NH <sub>3</sub>           | 2023.9 | a <sub>18</sub>                                 |
| 311.1                      | GGDV-<br>H <sub>2</sub> O                      | 640.3               | QIGGD<br>VS-NH <sub>3</sub>                         | 973.4               | LuITNE<br>GS-H <sub>2</sub> O       | 1348.6               | SDTEM<br>QIGGD<br>VSQ                      | 2024.9 | DLuITN<br>EGSDT<br>EMQIG<br>GD-28               |
| 311.2                      | ITN-H <sub>2</sub> O                           | 642.3               | TEMQIG<br>-H <sub>2</sub> O                         | 974.4               | NEGSD<br>TEMQ-<br>H <sub>2</sub> O  | 1348.6               | ITNEGS<br>DTEMQI<br>G-28                   | 2033.9 | b <sub>18</sub> -H <sub>2</sub> O               |
| 312.2                      | ITN-NH <sub>3</sub>                            | 643.3               | TEMQIG<br>-NH <sub>3</sub>                          | 974.4               | EGSDT<br>EMQI-<br>NH <sub>3</sub>   | 1351.6               | GDLuIT<br>NEGSD<br>T-28                    | 2034.8 | b <sub>18</sub> -NH <sub>3</sub>                |
| 315.2                      | VSQ                                            | 646.8 <sup>+2</sup> | y <sub>12</sub> <sup>+2</sup>                       | 974.4               | LuITNE<br>GS-NH <sub>3</sub>        | 1354.5               | uITNEG<br>SDTEM                            | 2034.8 | DLuITN<br>EGSDT<br>EMQIG<br>GD-H <sub>2</sub> O |

|                     |                                                  |       |                                     |                     |                                                   |        |                                        |        |                                              |
|---------------------|--------------------------------------------------|-------|-------------------------------------|---------------------|---------------------------------------------------|--------|----------------------------------------|--------|----------------------------------------------|
| 315.2               | <b>IGGD-28</b>                                   | 647.3 | <b>GDLuI-28</b>                     | 975.3               | <b>NEGSD TEMQ-NH<sub>3</sub></b>                  | 1358.6 | <b>ITNEGS DTEMQI G-H<sub>2</sub>O</b>  | 2035.8 | <b>DLuITN EGSDT EMQIG GD-NH<sub>3</sub></b>  |
| 317.1               | <b>TNE-28</b>                                    | 648.3 | <b>a<sub>5</sub></b>                | 975.4               | <b>uITNEG SD-H<sub>2</sub>O</b>                   | 1359.6 | <b>ITNEGS DTEMQI G-NH<sub>3</sub></b>  | 2036.9 | <b>LuITNE GSDTE MQIGG DV</b>                 |
| 317.2 <sup>+2</sup> | <b>y<sub>6</sub><sup>+2</sup></b>                | 657.3 | <b>GDLuI-H<sub>2</sub>O</b>         | 976.4               | <b>uITNEG SD-NH<sub>3</sub></b>                   | 1361.6 | <b>GDLuIT NEGSD T-H<sub>2</sub>O</b>   | 2051.9 | <b>b<sub>18</sub></b>                        |
| 318.1               | <b>DTE-28</b>                                    | 657.3 | <b>IGGDVS Q</b>                     | 976.4               | <b>GSDTE MQIGG</b>                                | 1362.6 | <b>GDLuIT NEGSD T-NH<sub>3</sub></b>   | 2052.9 | <b>DLuITN EGSDT EMQIG GD</b>                 |
| 325.2               | <b>IGGD-H<sub>2</sub>O</b>                       | 657.3 | <b>QIGGD VS</b>                     | 976.5               | <b>a<sub>8</sub></b>                              | 1364.6 | <b>a<sub>12</sub></b>                  | 2063.9 | <b>a<sub>19</sub>-NH<sub>3</sub></b>         |
| 327.1               | <b>TNE-H<sub>2</sub>O</b>                        | 658.3 | <b>b<sub>5</sub>-H<sub>2</sub>O</b> | 986.4               | <b>b<sub>8</sub>-H<sub>2</sub>O</b>               | 1374.6 | <b>b<sub>12</sub>-H<sub>2</sub>O</b>   | 2080.9 | <b>a<sub>19</sub></b>                        |
| 328.1               | <b>DTE-H<sub>2</sub>O</b>                        | 659.3 | <b>b<sub>5</sub>-NH<sub>3</sub></b> | 987.4               | <b>b<sub>8</sub>-NH<sub>3</sub></b>               | 1375.5 | <b>b<sub>12</sub>-NH<sub>3</sub></b>   | 2081.9 | <b>GDLuIT NEGSD TEMQIG GD-28</b>             |
| 328.1               | <b>TNE-NH<sub>3</sub></b>                        | 660.3 | <b>TEMQIG</b>                       | 990.5               | <b>TEMQIG GDVS-28</b>                             | 1376.6 | <b>ITNEGS DTEMQI G</b>                 | 2090.9 | <b>b<sub>19</sub>-H<sub>2</sub>O</b>         |
| 328.2               | <b>QIGG-28</b>                                   | 664.3 | <b>SDTEM Q-28</b>                   | 991.4               | <b>EGSDT EMQI</b>                                 | 1377.6 | <b>GSDTE MQIGG DVSQ-28</b>             | 2091.9 | <b>b<sub>19</sub>-NH<sub>3</sub></b>         |
| 329.1               | <b>GGDV</b>                                      | 672.3 | <b>y<sub>7</sub>-H<sub>2</sub>O</b> | 991.5               | <b>DLuITN EG-28</b>                               | 1378.6 | <b>EGSDT EMQIG GDVS-28</b>             | 2091.9 | <b>GDLuIT NEGSD TEMQIG GD-H<sub>2</sub>O</b> |
| 329.2               | <b>ITN</b>                                       | 673.3 | <b>y<sub>7</sub>-NH<sub>3</sub></b> | 991.5               | <b>GDLuIT NE-28</b>                               | 1379.6 | <b>GDLuIT NEGSD T</b>                  | 2092.8 | <b>GDLuIT NEGSD TEMQIG GD-NH<sub>3</sub></b> |
| 331.2               | <b>GDVS-28</b>                                   | 673.3 | <b>MQIGG DV-28</b>                  | 991.5               | <b>LuITNE GS</b>                                  | 1387.6 | <b>GSDTE MQIGG DVSQ-H<sub>2</sub>O</b> | 2095.9 | <b>LuITNE GSDTE MQIGG DVS-28</b>             |
| 333.1               | <b>GSDT-28</b>                                   | 674.2 | <b>SDTEM Q-H<sub>2</sub>O</b>       | 992.4               | <b>NEGSD TEMQ</b>                                 | 1388.6 | <b>GSDTE MQIGG DVSQ-NH<sub>3</sub></b> | 2105.9 | <b>LuITNE GSDTE MQIGG DVS-H<sub>2</sub>O</b> |
| 334.1               | <b>TEM-28</b>                                    | 675.2 | <b>SDTEM Q-NH<sub>3</sub></b>       | 993.4               | <b>uITNEG SD</b>                                  | 1388.6 | <b>EGSDT EMQIG GDVS-H<sub>2</sub>O</b> | 2106.9 | <b>LuITNE GSDTE MQIGG DVS-NH<sub>3</sub></b> |
| 336.7 <sup>+2</sup> | <b>y<sub>7</sub>-H<sub>2</sub>O<sup>+2</sup></b> | 675.3 | <b>GDLuI</b>                        | 996.0 <sup>+2</sup> | <b>y<sub>19</sub>-H<sub>2</sub>O<sup>+2</sup></b> | 1389.5 | <b>EGSDT EMQIG GDVS-NH<sub>3</sub></b> | 2108.9 | <b>b<sub>19</sub></b>                        |



|                     |                                                  |       |                                    |                      |                                                   |        |                                                     |        |                                                                |
|---------------------|--------------------------------------------------|-------|------------------------------------|----------------------|---------------------------------------------------|--------|-----------------------------------------------------|--------|----------------------------------------------------------------|
| 337.2 <sup>+2</sup> | <b>y<sub>7</sub>-NH<sub>3</sub><sup>+2</sup></b> | 676.3 | <b>b<sub>5</sub></b>               | 996.5 <sup>+2</sup>  | <b>y<sub>19</sub>-NH<sub>3</sub><sup>+2</sup></b> | 1389.6 | <b>y<sub>13</sub>-H<sub>2</sub>O</b>                | 2109.9 | <b>GDLuIT<br/>NEGSD<br/>TEMQIG<br/>GD</b>                      |
| 339.2               | <b>QIGG-NH<sub>3</sub></b>                       | 677.3 | <b>TNEGS<br/>DT-28</b>             | 1000.4               | <b>TEMQIG<br/>GDVS-<br/>H<sub>2</sub>O</b>        | 1390.6 | <b>y<sub>13</sub>-NH<sub>3</sub></b>                | 2110.9 | <b>uITNEG<br/>SDTEM<br/>QIGGD<br/>VSQ-28</b>                   |
| 341.1               | <b>GDVS-<br/>H<sub>2</sub>O</b>                  | 683.3 | <b>MQIGG<br/>DV-H<sub>2</sub>O</b> | 1001.4               | <b>TEMQIG<br/>GDVS-<br/>NH<sub>3</sub></b>        | 1392.6 | <b>b<sub>12</sub></b>                               | 2120.9 | <b>uITNEG<br/>SDTEM<br/>QIGGD<br/>VSQ-<br/>H<sub>2</sub>O</b>  |
| 343.1               | <b>GSDT-<br/>H<sub>2</sub>O</b>                  | 684.3 | <b>MQIGG<br/>DV-NH<sub>3</sub></b> | 1001.4               | <b>DLuITN<br/>EG-H<sub>2</sub>O</b>               | 1405.6 | <b>GSDTE<br/>MQIGG<br/>DVSQ</b>                     | 2121.9 | <b>uITNEG<br/>SDTEM<br/>QIGGD<br/>VSQ-<br/>NH<sub>3</sub></b>  |
| 343.2               | <b>IGGD</b>                                      | 687.3 | <b>TNEGS<br/>DT-H<sub>2</sub>O</b> | 1001.4               | <b>GDLuIT<br/>NE-H<sub>2</sub>O</b>               | 1405.6 | <b>NEGSD<br/>TEMQIG<br/>GDV-28</b>                  | 2123.9 | <b>LuITNE<br/>GSDTE<br/>MQIGG<br/>DVS</b>                      |
| 344.1               | <b>TEM-<br/>H<sub>2</sub>O</b>                   | 688.2 | <b>TNEGS<br/>DT-NH<sub>3</sub></b> | 1002.4               | <b>DLuITN<br/>EG-NH<sub>3</sub></b>               | 1405.6 | <b>ITNEGS<br/>DTEMQI<br/>GG-28</b>                  | 2123.9 | <b>DLuITN<br/>EGSDT<br/>EMQIG<br/>GDV-28</b>                   |
| 344.2               | <b>y<sub>3</sub>-H<sub>2</sub>O</b>              | 689.3 | <b>ITNEGS<br/>D-28</b>             | 1002.4               | <b>GDLuIT<br/>NE-NH<sub>3</sub></b>               | 1406.6 | <b>EGSDT<br/>EMQIG<br/>GDVS</b>                     | 2133.9 | <b>DLuITN<br/>EGSDT<br/>EMQIG<br/>GDV-<br/>H<sub>2</sub>O</b>  |
| 345.1               | <b>TNE</b>                                       | 689.3 | <b>TEMQIG<br/>G-28</b>             | 1004.5               | <b>b<sub>8</sub></b>                              | 1407.6 | <b>TNEGS<br/>DTEMQI<br/>GGD-28</b>                  | 2134.9 | <b>DLuITN<br/>EGSDT<br/>EMQIG<br/>GDV-<br/>NH<sub>3</sub></b>  |
| 345.2               | <b>y<sub>3</sub>-NH<sub>3</sub></b>              | 690.3 | <b>DTEMQI<br/>-28</b>              | 1005.0 <sup>+2</sup> | <b>y<sub>19</sub><sup>+2</sup></b>                | 1407.6 | <b>y<sub>13</sub></b>                               | 2138.9 | <b>uITNEG<br/>SDTEM<br/>QIGGD<br/>VSQ</b>                      |
| 345.2               | <b>MQI-28</b>                                    | 690.3 | <b>y<sub>7</sub></b>               | 1006.4               | <b>SDTEM<br/>QIGGD-<br/>28</b>                    | 1415.6 | <b>NEGSD<br/>TEMQIG<br/>GDV-<br/>H<sub>2</sub>O</b> | 2151.9 | <b>DLuITN<br/>EGSDT<br/>EMQIG<br/>GDV</b>                      |
| 345.7 <sup>+2</sup> | <b>y<sub>7</sub><sup>+2</sup></b>                | 690.4 | <b>LuITN-<br/>28</b>               | 1016.4               | <b>SDTEM<br/>QIGGD-<br/>H<sub>2</sub>O</b>        | 1415.6 | <b>ITNEGS<br/>DTEMQI<br/>GG-H<sub>2</sub>O</b>      | 2178.9 | <b>a<sub>20</sub>-NH<sub>3</sub></b>                           |
| 346.1               | <b>DTE</b>                                       | 691.4 | <b>DLuIT-<br/>28</b>               | 1017.4               | <b>SDTEM<br/>QIGGD-<br/>NH<sub>3</sub></b>        | 1416.6 | <b>NEGSD<br/>TEMQIG<br/>GDV-<br/>NH<sub>3</sub></b> | 2181.0 | <b>GDLuIT<br/>NEGSD<br/>TEMQIG<br/>GDV-28</b>                  |
| 355.2               | <b>a<sub>4</sub>-NH<sub>3</sub></b>              | 692.3 | <b>SDTEM<br/>Q</b>                 | 1017.5               | <b>EMQIG<br/>GDVSQ-<br/>28</b>                    | 1416.6 | <b>ITNEGS<br/>DTEMQI<br/>GG-NH<sub>3</sub></b>      | 2190.9 | <b>GDLuIT<br/>NEGSD<br/>TEMQIG<br/>GDV-<br/>H<sub>2</sub>O</b> |

|       |                            |                     |                                                               |        |                                      |        |                                        |        |                                               |
|-------|----------------------------|---------------------|---------------------------------------------------------------|--------|--------------------------------------|--------|----------------------------------------|--------|-----------------------------------------------|
| 356.2 | <b>MQI-NH<sub>3</sub></b>  | 695.3 <sup>+2</sup> | <b>y<sub>13</sub><sup>-</sup>-H<sub>2</sub>O<sup>+2</sup></b> | 1018.5 | <b>TEMQIG GDVS</b>                   | 1417.6 | <b>TNEGS DTEMQI GGD-H<sub>2</sub>O</b> | 2191.9 | <b>GDLuIT NEGSD TEMQIG GDV-NH<sub>3</sub></b> |
| 356.2 | <b>QIGG</b>                | 695.8 <sup>+2</sup> | <b>y<sub>13</sub><sup>-</sup>-NH<sub>3</sub><sup>+2</sup></b> | 1018.5 | <b>DTEMQI GGDV-28</b>                | 1418.5 | <b>TNEGS DTEMQI GGD-NH<sub>3</sub></b> | 2195.9 | <b>a<sub>20</sub></b>                         |
| 359.2 | <b>GDVS</b>                | 699.3               | <b>ITNEGS D-H<sub>2</sub>O</b>                                | 1019.5 | <b>DLuITN EG</b>                     | 1423.6 | <b>DLuITN EGSDT E-28</b>               | 2205.9 | <b>b<sub>20</sub>-H<sub>2</sub>O</b>          |
| 360.2 | <b>NEGS-28</b>             | 699.3               | <b>TEMQIG G-H<sub>2</sub>O</b>                                | 1019.5 | <b>GDLuIT NE</b>                     | 1433.6 | <b>NEGSD TEMQIG GDV</b>                | 2206.9 | <b>b<sub>20</sub>-NH<sub>3</sub></b>          |
| 361.1 | <b>GSDT</b>                | 700.3               | <b>ITNEGS D-NH<sub>3</sub></b>                                | 1020.4 | <b>EGSDT EMQIG-28</b>                | 1433.6 | <b>DLuITN EGSDT E-H<sub>2</sub>O</b>   | 2208.9 | <b>GDLuIT NEGSD TEMQIG GDV</b>                |
| 361.1 | <b>EGSD-28</b>             | 700.3               | <b>DTEMQI -H<sub>2</sub>O</b>                                 | 1027.5 | <b>EMQIG GDVSQ-H<sub>2</sub>O</b>    | 1433.6 | <b>ITNEGS DTEMQI GG</b>                | 2211.0 | <b>DLuITN EGSDT EMQIG GDVS-28</b>             |
| 361.2 | <b>EMQ-28</b>              | 700.3               | <b>TEMQIG G-NH<sub>3</sub></b>                                | 1028.4 | <b>EMQIG GDVSQ-NH<sub>3</sub></b>    | 1434.6 | <b>DLuITN EGSDT E-NH<sub>3</sub></b>   | 2220.9 | <b>DLuITN EGSDT EMQIG GDVS-H<sub>2</sub>O</b> |
| 362.1 | <b>TEM</b>                 | 700.4               | <b>LuITN-H<sub>2</sub>O</b>                                   | 1028.4 | <b>DTEMQI GGDV-H<sub>2</sub>O</b>    | 1435.6 | <b>TNEGS DTEMQI GGD</b>                | 2221.9 | <b>DLuITN EGSDT EMQIG GDVS-NH<sub>3</sub></b> |
| 362.2 | <b>ul-28</b>               | 701.3               | <b>DTEMQI -NH<sub>3</sub></b>                                 | 1029.4 | <b>DTEMQI GGDV-NH<sub>3</sub></b>    | 1439.6 | <b>LuITNE GSDTE M-28</b>               | 2223.9 | <b>b<sub>20</sub></b>                         |
| 362.2 | <b>Lu-28</b>               | 701.3               | <b>MQIGG DV</b>                                               | 1030.4 | <b>EGSDT EMQIG-H<sub>2</sub>O</b>    | 1448.6 | <b>a<sub>13</sub>-NH<sub>3</sub></b>   | 2224.0 | <b>LuITNE GSDTE MQIGG DVSQ-28</b>             |
| 362.2 | <b>y<sub>3</sub></b>       | 701.3               | <b>DLuIT-H<sub>2</sub>O</b>                                   | 1031.4 | <b>EGSDT EMQIG-NH<sub>3</sub></b>    | 1449.6 | <b>LuITNE GSDTE M-H<sub>2</sub>O</b>   | 2234.0 | <b>LuITNE GSDTE MQIGG DVSQ-H<sub>2</sub>O</b> |
| 370.1 | <b>NEGS-H<sub>2</sub>O</b> | 701.3               | <b>LuITN-NH<sub>3</sub></b>                                   | 1034.4 | <b>SDTEM QIGGD</b>                   | 1450.6 | <b>LuITNE GSDTE M-NH<sub>3</sub></b>   | 2235.0 | <b>LuITNE GSDTE MQIGG DVSQ-NH<sub>3</sub></b> |
| 371.1 | <b>EGSD-H<sub>2</sub>O</b> | 703.3               | <b>EMQIG GD-28</b>                                            | 1044.5 | <b>y<sub>10</sub>-H<sub>2</sub>O</b> | 1451.6 | <b>DLuITN EGSDT E</b>                  | 2239.0 | <b>DLuITN EGSDT EMQIG GDVS</b>                |

|       |                                  |                            |                               |        |                                      |        |                                        |        |                                                        |
|-------|----------------------------------|----------------------------|-------------------------------|--------|--------------------------------------|--------|----------------------------------------|--------|--------------------------------------------------------|
| 371.1 | NEGS-NH <sub>3</sub>             | 704.324<br>7 <sup>+2</sup> | y <sub>13</sub> <sup>+2</sup> | 1045.5 | EMQIG<br>GDVSQ                       | 1454.6 | uITNEG<br>SDTEM<br>Q-28                | 2252.0 | LuITNE<br>GSDTE<br>MQIGG<br>DVSQ                       |
| 371.1 | EMQ-H <sub>2</sub> O             | 705.3                      | NEGSD<br>TE-28                | 1045.5 | y <sub>10</sub> -NH <sub>3</sub>     | 1464.6 | uITNEG<br>SDTEM<br>Q-H <sub>2</sub> O  | 2267.0 | y <sub>20</sub> -H <sub>2</sub> O                      |
| 372.1 | EMQ-NH <sub>3</sub>              | 705.3                      | TNEGS<br>DT                   | 1046.4 | DTEMQI<br>GGDV                       | 1465.6 | uITNEG<br>SDTEM<br>Q-NH <sub>3</sub>   | 2268.0 | y <sub>20</sub> -NH <sub>3</sub>                       |
| 372.2 | a <sub>4</sub>                   | 706.3                      | uITNE-<br>28                  | 1048.4 | EGSDT<br>EMQIG                       | 1465.6 | a <sub>13</sub>                        | 2268.0 | GDLuIT<br>NEGSD<br>TEMQIG<br>GDVS-<br>28               |
| 373.2 | MQI                              | 713.3                      | EMQIG<br>GD-H <sub>2</sub> O  | 1048.5 | GDLuIT<br>NEG-28                     | 1467.6 | LuITNE<br>GSDTE<br>M                   | 2278.0 | GDLuIT<br>NEGSD<br>TEMQIG<br>GDVS-<br>H <sub>2</sub> O |
| 374.2 | TNEG-<br>28                      | 714.3                      | EMQIG<br>GD-NH <sub>3</sub>   | 1050.4 | ITNEGS<br>DTEM-<br>28                | 1475.6 | b <sub>13</sub> -H <sub>2</sub> O      | 2278.0 | a <sub>21</sub> -NH <sub>3</sub>                       |
| 382.2 | b <sub>4</sub> -H <sub>2</sub> O | 715.3                      | NEGSD<br>TE-H <sub>2</sub> O  | 1058.5 | GDLuIT<br>NEG-<br>H <sub>2</sub> O   | 1476.6 | b <sub>13</sub> -NH <sub>3</sub>       | 2279.0 | GDLuIT<br>NEGSD<br>TEMQIG<br>GDVS-<br>NH <sub>3</sub>  |
| 383.2 | b <sub>4</sub> -NH <sub>3</sub>  | 716.2                      | NEGSD<br>TE-NH <sub>3</sub>   | 1059.4 | GDLuIT<br>NEG-<br>NH <sub>3</sub>    | 1476.7 | y <sub>14</sub> -H <sub>2</sub> O      | 2285.0 | y <sub>20</sub>                                        |
| 384.2 | TNEG-<br>H <sub>2</sub> O        | 716.3                      | uITNE-<br>H <sub>2</sub> O    | 1060.4 | ITNEGS<br>DTEM-<br>H <sub>2</sub> O  | 1477.6 | y <sub>14</sub> -NH <sub>3</sub>       | 2295.0 | a <sub>21</sub>                                        |
| 385.1 | TNEG-<br>NH <sub>3</sub>         | 717.3                      | uITNE-<br>NH <sub>3</sub>     | 1061.4 | ITNEGS<br>DTEM-<br>NH <sub>3</sub>   | 1480.6 | GDLuIT<br>NEGSD<br>TE-28               | 2296.0 | GDLuIT<br>NEGSD<br>TEMQIG<br>GDVS                      |
| 388.1 | NEGS                             | 717.3                      | ITNEGS<br>D                   | 1062.5 | y <sub>10</sub>                      | 1482.6 | uITNEG<br>SDTEM<br>Q                   | 2305.0 | b <sub>21</sub> -H <sub>2</sub> O                      |
| 388.2 | GGDVS-<br>28                     | 717.3                      | TEMQIG<br>G                   | 1063.4 | GSDTE<br>MQIGG<br>D-28               | 1490.6 | GDLuIT<br>NEGSD<br>TE-H <sub>2</sub> O | 2306.0 | b <sub>21</sub> -NH <sub>3</sub>                       |
| 389.1 | EGSD                             | 718.3                      | DTEMQI                        | 1065.4 | TNEGS<br>DTEMQ-<br>28                | 1491.6 | GDLuIT<br>NEGSD<br>TE-NH <sub>3</sub>  | 2323.0 | b <sub>21</sub>                                        |
| 389.1 | EMQ                              | 718.4                      | LuITN                         | 1066.5 | uITNEG<br>SDT-28                     | 1492.6 | NEGSD<br>TEMQIG<br>GDVS-<br>28         | 2339.0 | DLuITN<br>EGSDT<br>EMQIG<br>GDVSQ-<br>28               |
| 390.2 | ul                               | 719.3                      | DLuIT                         | 1073.4 | GSDTE<br>MQIGG<br>D-H <sub>2</sub> O | 1493.6 | b <sub>13</sub>                        | 2349.0 | DLuITN<br>EGSDT<br>EMQIG<br>GDVSQ-<br>H <sub>2</sub> O |

|                     |                                                |                     |                                                     |        |                                      |        |                                              |        |                                                         |
|---------------------|------------------------------------------------|---------------------|-----------------------------------------------------|--------|--------------------------------------|--------|----------------------------------------------|--------|---------------------------------------------------------|
| 390.2               | Lu                                             | 721.3               | GSDTE<br>MQ-28                                      | 1074.4 | GSDTE<br>MQIG<br>D-NH <sub>3</sub>   | 1494.7 | y <sub>14</sub>                              | 2350.0 | DLuITN<br>EGSDT<br>EMQIG<br>GDVSQ-<br>NH <sub>3</sub>   |
| 393.2 <sup>+2</sup> | y <sub>8</sub> -H <sub>2</sub> O <sup>+2</sup> | 722.3               | EGSDT<br>EM-28                                      | 1075.4 | TNEGS<br>DTEMQ-<br>H <sub>2</sub> O  | 1502.6 | NEGSD<br>TEMQIG<br>GDVS-<br>H <sub>2</sub> O | 2365.0 | a <sub>22</sub> -NH <sub>3</sub>                        |
| 393.7 <sup>+2</sup> | y <sub>8</sub> -NH <sub>3</sub> <sup>+2</sup>  | 731.3               | GSDTE<br>MQ-H <sub>2</sub> O                        | 1076.4 | TNEGS<br>DTEMQ-<br>NH <sub>3</sub>   | 1503.6 | NEGSD<br>TEMQIG<br>GDVS-<br>NH <sub>3</sub>  | 2367.0 | DLuITN<br>EGSDT<br>EMQIG<br>GDVSQ                       |
| 398.2               | GGDVS-<br>H <sub>2</sub> O                     | 731.3               | EMQIG<br>GD                                         | 1076.4 | uITNEG<br>SDT-<br>H <sub>2</sub> O   | 1506.6 | EGSDT<br>EMQIG<br>GDVSQ-<br>28               | 2380.1 | y <sub>21</sub> -H <sub>2</sub> O                       |
| 400.2               | b <sub>4</sub>                                 | 732.3               | EGSDT<br>EM-H <sub>2</sub> O                        | 1076.5 | GDLuIT<br>NEG                        | 1506.6 | TNEGS<br>DTEMQI<br>GGDV-<br>28               | 2381.1 | y <sub>21</sub> -NH <sub>3</sub>                        |
| 402.2               | TNEG                                           | 732.3               | GSDTE<br>MQ-NH <sub>3</sub>                         | 1077.4 | uITNEG<br>SDT-<br>NH <sub>3</sub>    | 1508.6 | GDLuIT<br>NEGSD<br>TE                        | 2382.0 | a <sub>22</sub>                                         |
| 402.2               | DVSQ-<br>28                                    | 733.3               | NEGSD<br>TE                                         | 1077.5 | NEGSD<br>TEMQI-<br>28                | 1516.6 | EGSDT<br>EMQIG<br>GDVSQ-<br>H <sub>2</sub> O | 2392.0 | b <sub>22</sub> -H <sub>2</sub> O                       |
| 402.2 <sup>+2</sup> | y <sub>8</sub> <sup>+2</sup>                   | 734.3               | uITNE                                               | 1077.5 | EGSDT<br>EMQIG<br>G-28               | 1516.6 | TNEGS<br>DTEMQI<br>GGDV-<br>H <sub>2</sub> O | 2393.0 | b <sub>22</sub> -NH <sub>3</sub>                        |
| 402.2               | MQIG-<br>28                                    | 738.8 <sup>+2</sup> | y <sub>14</sub> -<br>H <sub>2</sub> O <sup>+2</sup> | 1078.4 | ITNEGS<br>DTEM                       | 1517.6 | EGSDT<br>EMQIG<br>GDVSQ-<br>NH <sub>3</sub>  | 2396.0 | GDLuIT<br>NEGSD<br>TEMQIG<br>GDVSQ-<br>28               |
| 405.2               | SDTE-<br>28                                    | 739.3 <sup>+2</sup> | y <sub>14</sub> -<br>NH <sub>3</sub> <sup>+2</sup>  | 1078.5 | LuITNE<br>GSD-28                     | 1517.6 | TNEGS<br>DTEMQI<br>GGDV-<br>NH <sub>3</sub>  | 2398.1 | y <sub>21</sub>                                         |
| 412.2               | DVSQ-<br>H <sub>2</sub> O                      | 744.3               | a <sub>6</sub> -NH <sub>3</sub>                     | 1078.5 | DLuITN<br>EGS-28                     | 1520.6 | NEGSD<br>TEMQIG<br>GDVS                      | 2406.0 | GDLuIT<br>NEGSD<br>TEMQIG<br>GDVSQ-<br>H <sub>2</sub> O |
| 413.2               | DVSQ-<br>NH <sub>3</sub>                       | 747.3               | DTEMQI<br>G-28                                      | 1087.4 | NEGSD<br>TEMQI-<br>H <sub>2</sub> O  | 1520.7 | ITNEGS<br>DTEMQI<br>GGD-28                   | 2407.0 | GDLuIT<br>NEGSD<br>TEMQIG<br>GDVSQ-<br>NH <sub>3</sub>  |
| 413.2               | MQIG-<br>NH <sub>3</sub>                       | 747.8 <sup>+2</sup> | y <sub>14</sub> <sup>+2</sup>                       | 1087.4 | EGSDT<br>EMQIG<br>G-H <sub>2</sub> O | 1530.6 | ITNEGS<br>DTEMQI<br>GGD-<br>H <sub>2</sub> O | 2410.0 | b <sub>22</sub>                                         |
| 414.2               | IGGDV-<br>28                                   | 748.4               | GDLuIT-<br>28                                       | 1088.4 | NEGSD<br>TEMQI-<br>NH <sub>3</sub>   | 1531.6 | ITNEGS<br>DTEMQI<br>GGD-<br>NH <sub>3</sub>  | 2424.0 | GDLuIT<br>NEGSD<br>TEMQIG<br>GDVSQ                      |

|                     |                                                  |                     |                                                   |        |                                     |        |                                       |        |                                      |
|---------------------|--------------------------------------------------|---------------------|---------------------------------------------------|--------|-------------------------------------|--------|---------------------------------------|--------|--------------------------------------|
| 415.1               | <b>SDTE-H<sub>2</sub>O</b>                       | 749.3               | <b>GSDTE MQ</b>                                   | 1088.4 | <b>EGSDT EMQIG G-NH<sub>3</sub></b> | 1533.7 | <b>y<sub>15</sub>-H<sub>2</sub>O</b>  | 2493.1 | <b>a<sub>23</sub>-NH<sub>3</sub></b> |
| 416.2               | <b>GGDVS</b>                                     | 750.3               | <b>EGSDT EM</b>                                   | 1088.5 | <b>LuITNE GSD-H<sub>2</sub>O</b>    | 1534.6 | <b>EGSDT EMQIG GDVSQ</b>              | 2495.1 | <b>y<sub>22</sub>-H<sub>2</sub>O</b> |
| 424.2               | <b>IGGDV-H<sub>2</sub>O</b>                      | 757.3               | <b>DTEMQI G-H<sub>2</sub>O</b>                    | 1088.5 | <b>DLuITN EGS-H<sub>2</sub>O</b>    | 1534.6 | <b>TNEGS DTEMQI GGDV</b>              | 2496.1 | <b>y<sub>22</sub>-NH<sub>3</sub></b> |
| 430.2               | <b>DVSQ</b>                                      | 757.4               | <b>QIGGD VSQ-28</b>                               | 1088.5 | <b>a<sub>9</sub>-NH<sub>3</sub></b> | 1534.7 | <b>y<sub>15</sub>-NH<sub>3</sub></b>  | 2510.1 | <b>a<sub>23</sub></b>                |
| 430.2               | <b>MQIG</b>                                      | 758.3               | <b>DTEMQI G-NH<sub>3</sub></b>                    | 1089.5 | <b>LuITNE GSD-NH<sub>3</sub></b>    | 1548.6 | <b>ITNEGS DTEMQI GGD</b>              | 2513.1 | <b>y<sub>22</sub></b>                |
| 430.2               | <b>ITNE-28</b>                                   | 758.4               | <b>GDLuIT-H<sub>2</sub>O</b>                      | 1089.5 | <b>DLuITN EGS-NH<sub>3</sub></b>    | 1551.7 | <b>y<sub>15</sub></b>                 | 2520.1 | <b>b<sub>23</sub>-H<sub>2</sub>O</b> |
| 433.2               | <b>SDTE</b>                                      | 760.4               | <b>MQIGG DVS-28</b>                               | 1091.4 | <b>GSDTE MQIGG D</b>                | 1554.6 | <b>DLuITN EGSDT EM-28</b>             | 2521.1 | <b>b<sub>23</sub>-NH<sub>3</sub></b> |
| 440.2               | <b>ITNE-H<sub>2</sub>O</b>                       | 761.4               | <b>a<sub>6</sub></b>                              | 1093.4 | <b>TNEGS DTEMQ</b>                  | 1564.6 | <b>DLuITN EGSDT EM-H<sub>2</sub>O</b> | 2538.1 | <b>b<sub>23</sub></b>                |
| 441.2               | <b>ITNE-NH<sub>3</sub></b>                       | 763.3               | <b>uITNEG -28</b>                                 | 1094.4 | <b>uITNEG SDT</b>                   | 1565.6 | <b>DLuITN EGSDT EM-NH<sub>3</sub></b> | 2552.1 | <b>y<sub>23</sub>-H<sub>2</sub>O</b> |
| 442.2               | <b>IGGDV</b>                                     | 767.4 <sup>+2</sup> | <b>y<sub>15</sub>-H<sub>2</sub>O<sup>+2</sup></b> | 1105.4 | <b>NEGSD TEMQI</b>                  | 1567.7 | <b>uITNEG SDTEM QI-28</b>             | 2553.1 | <b>y<sub>23</sub>-NH<sub>3</sub></b> |
| 443.2               | <b>QIGGD-28</b>                                  | 767.4               | <b>QIGGD VSQ-H<sub>2</sub>O</b>                   | 1105.4 | <b>EGSDT EMQIG G</b>                | 1567.7 | <b>LuITNE GSDTE MQ-28</b>             | 2570.1 | <b>y<sub>23</sub></b>                |
| 443.3               | <b>y<sub>4</sub>-H<sub>2</sub>O</b>              | 767.8 <sup>+2</sup> | <b>y<sub>15</sub>-NH<sub>3</sub><sup>+2</sup></b> | 1105.5 | <b>DTEMQI GGDVS-28</b>              | 1577.6 | <b>a<sub>14</sub>-NH<sub>3</sub></b>  | 2666.2 | <b>MH-H<sub>2</sub>O</b>             |
| 444.2               | <b>y<sub>4</sub>-NH<sub>3</sub></b>              | 768.4               | <b>QIGGD VSQ-NH<sub>3</sub></b>                   | 1105.5 | <b>SDTEM QIGGD V-28</b>             | 1577.7 | <b>uITNEG SDTEM QI-H<sub>2</sub>O</b> | 2667.2 | <b>MH-NH<sub>3</sub></b>             |
| 449.2               | <b>DTEM-28</b>                                   | 770.4               | <b>MQIGG DVS-H<sub>2</sub>O</b>                   | 1105.5 | <b>a<sub>9</sub></b>                | 1577.7 | <b>LuITNE GSDTE MQ-H<sub>2</sub>O</b> | 2684.2 | <b>MH</b>                            |
| 453.2               | <b>QIGGD-H<sub>2</sub>O</b>                      | 771.3               | <b>MQIGG DVS-NH<sub>3</sub></b>                   | 1106.5 | <b>LuITNE GSD</b>                   | 1578.6 | <b>uITNEGS DTEMQI-NH<sub>3</sub></b>  |        |                                      |
| 454.2               | <b>QIGGD-NH<sub>3</sub></b>                      | 771.4               | <b>b<sub>6</sub>-H<sub>2</sub>O</b>               | 1106.5 | <b>DLuITN EGS</b>                   | 1578.6 | <b>LuITNEGS DTEMQ-NH<sub>3</sub></b>  |        |                                      |
| 457.2 <sup>+2</sup> | <b>y<sub>9</sub>-H<sub>2</sub>O<sup>+2</sup></b> | 772.3               | <b>b<sub>6</sub>-NH<sub>3</sub></b>               | 1115.5 | <b>DTEMQI GGDVS-H<sub>2</sub>O</b>  | 1582.6 | <b>DLuITNEGS DTEM</b>                 |        |                                      |

# EG\_NLTISSDK

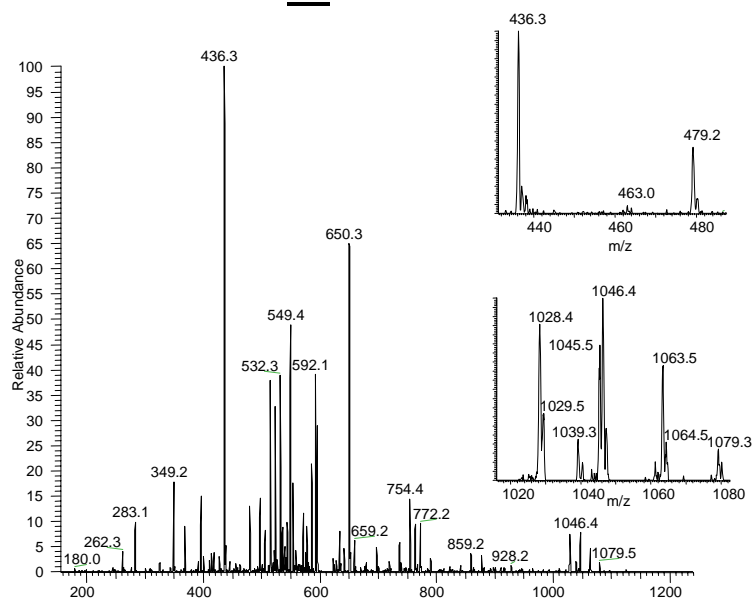

|                     |                                                  |                     |                                                  |                     |                                                  |                     |                                                  |       |                                     |
|---------------------|--------------------------------------------------|---------------------|--------------------------------------------------|---------------------|--------------------------------------------------|---------------------|--------------------------------------------------|-------|-------------------------------------|
| 60.0                | <b>S</b>                                         | 203.1               | <b>SD</b>                                        | 373.2 <sup>+2</sup> | <b>y<sub>7</sub>-H<sub>2</sub>O<sup>+2</sup></b> | 539.8 <sup>+2</sup> | <b>y<sub>9</sub>-H<sub>2</sub>O<sup>+2</sup></b> | 760.4 | <b>uLTISS-H<sub>2</sub>O</b>        |
| 65.6 <sup>+2</sup>  | <b>y<sub>1</sub>-NH<sub>3</sub><sup>+2</sup></b> | 209.6 <sup>+2</sup> | <b>y<sub>4</sub>-H<sub>2</sub>O<sup>+2</sup></b> | 373.7 <sup>+2</sup> | <b>y<sub>7</sub>-NH<sub>3</sub><sup>+2</sup></b> | 540.3 <sup>+2</sup> | <b>y<sub>9</sub>-NH<sub>3</sub><sup>+2</sup></b> | 762.4 | <b>a<sub>6</sub></b>                |
| 74.1                | <b>T</b>                                         | 210.1 <sup>+2</sup> | <b>y<sub>4</sub>-NH<sub>3</sub><sup>+2</sup></b> | 375.2               | <b>ISSD-28</b>                                   | 548.3               | <b>GuLT</b>                                      | 763.4 | <b>y<sub>7</sub></b>                |
| 74.1 <sup>+2</sup>  | <b>y<sub>1</sub><sup>+2</sup></b>                | 215.1               | <b>LT</b>                                        | 382.2 <sup>+2</sup> | <b>y<sub>7</sub><sup>+2</sup></b>                | 548.3               | <b>a<sub>4</sub></b>                             | 772.4 | <b>b<sub>6</sub>-H<sub>2</sub>O</b> |
| 84.1                | <b>K</b>                                         | 215.1               | <b>TI</b>                                        | 385.2               | <b>ISSD-H<sub>2</sub>O</b>                       | 548.8 <sup>+2</sup> | <b>y<sub>9</sub><sup>+2</sup></b>                | 778.4 | <b>uLTISS</b>                       |
| 86.1                | <b>L</b>                                         | 218.6 <sup>+2</sup> | <b>y<sub>4</sub><sup>+2</sup></b>                | 387.3               | <b>LTIS-28</b>                                   | 549.3               | <b>y<sub>5</sub></b>                             | 790.4 | <b>b<sub>6</sub></b>                |
| 86.1                | <b>I</b>                                         | 244.1               | <b>y<sub>2</sub>-H<sub>2</sub>O</b>              | 389.2               | <b>TISS</b>                                      | 558.2               | <b>b<sub>4</sub>-H<sub>2</sub>O</b>              | 807.4 | <b>GuLTIS S-28</b>                  |
| 88.0                | <b>D</b>                                         | 245.1               | <b>y<sub>2</sub>-NH<sub>3</sub></b>              | 390.2               | <b>uL</b>                                        | 576.3               | <b>b<sub>4</sub></b>                             | 817.4 | <b>GuLTIS S-H<sub>2</sub>O</b>      |
| 101.1               | <b>K</b>                                         | 260.2               | <b>ISS-28</b>                                    | 397.2               | <b>LTIS-H<sub>2</sub>O</b>                       | 576.3               | <b>uLTI-28</b>                                   | 835.4 | <b>GuLTIS S</b>                     |
| 102.1               | <b>E</b>                                         | 262.1               | <b>SSD-28</b>                                    | 403.2               | <b>ISSD</b>                                      | 586.3               | <b>uLTI-H<sub>2</sub>O</b>                       | 849.4 | <b>a<sub>7</sub></b>                |
| 122.7 <sup>+2</sup> | <b>y<sub>2</sub>-H<sub>2</sub>O<sup>+2</sup></b> | 262.1               | <b>y<sub>2</sub></b>                             | 415.3               | <b>LTIS</b>                                      | 589.3               | <b>LTISSD-28</b>                                 | 859.4 | <b>b<sub>7</sub>-H<sub>2</sub>O</b> |
| 123.1 <sup>+2</sup> | <b>y<sub>2</sub>-NH<sub>3</sub><sup>+2</sup></b> | 266.1 <sup>+2</sup> | <b>y<sub>5</sub>-H<sub>2</sub>O<sup>+2</sup></b> | 418.2               | <b>y<sub>4</sub>-H<sub>2</sub>O</b>              | 599.3               | <b>LTISSD-H<sub>2</sub>O</b>                     | 865.4 | <b>uLTISS D-28</b>                  |
| 126.1               | <b>K</b>                                         | 266.6 <sup>+2</sup> | <b>y<sub>5</sub>-NH<sub>3</sub><sup>+2</sup></b> | 419.2               | <b>y<sub>4</sub>-NH<sub>3</sub></b>              | 604.3 <sup>+2</sup> | <b>MH-H<sub>2</sub>O<sup>+2</sup></b>            | 875.4 | <b>uLTISS D-H<sub>2</sub>O</b>      |
| 129.1               | <b>K</b>                                         | 270.1               | <b>ISS-H<sub>2</sub>O</b>                        | 419.2               | <b>GuL-28</b>                                    | 604.3               | <b>uLTI</b>                                      | 877.4 | <b>b<sub>7</sub></b>                |
| 130.1               | <b>y<sub>1</sub>-NH<sub>3</sub></b>              | 272.1               | <b>SSD-H<sub>2</sub>O</b>                        | 435.2               | <b>a<sub>3</sub></b>                             | 604.8 <sup>+2</sup> | <b>MH-NH<sub>3</sub><sup>+2</sup></b>            | 893.4 | <b>uLTISS D</b>                     |
| 131.6 <sup>+2</sup> | <b>y<sub>2</sub><sup>+2</sup></b>                | 274.2               | <b>TIS-28</b>                                    | 436.2               | <b>y<sub>4</sub></b>                             | 613.3 <sup>+2</sup> | <b>MH<sup>+2</sup></b>                           | 922.4 | <b>GuLTIS SD-28</b>                 |
| 147.1               | <b>SS-28</b>                                     | 275.2 <sup>+2</sup> | <b>y<sub>5</sub><sup>+2</sup></b>                | 445.2               | <b>b<sub>3</sub>-H<sub>2</sub>O</b>              | 617.3               | <b>LTISSD</b>                                    | 932.4 | <b>GuLTIS SD-H<sub>2</sub>O</b>     |
| 147.1               | <b>y<sub>1</sub></b>                             | 284.2               | <b>TIS-H<sub>2</sub>O</b>                        | 447.2               | <b>GuL</b>                                       | 632.3               | <b>y<sub>6</sub>-H<sub>2</sub>O</b>              | 936.5 | <b>a<sub>8</sub></b>                |
| 157.1               | <b>SS-H<sub>2</sub>O</b>                         | 288.2               | <b>ISS</b>                                       | 463.2               | <b>b<sub>3</sub></b>                             | 633.3               | <b>y<sub>6</sub>-NH<sub>3</sub></b>              | 946.4 | <b>b<sub>8</sub>-H<sub>2</sub>O</b> |

|                     |                                                  |                     |                                                  |                     |                                                  |       |                                     |        |                                     |
|---------------------|--------------------------------------------------|---------------------|--------------------------------------------------|---------------------|--------------------------------------------------|-------|-------------------------------------|--------|-------------------------------------|
| 159.1               | <b>a<sub>2</sub></b>                             | 290.1               | <b>SSD</b>                                       | 463.2               | <b>uLT-28</b>                                    | 633.3 | <b>GuLTI-28</b>                     | 950.4  | <b>GuLTIS SD</b>                    |
| 166.1 <sup>+2</sup> | <b>y<sub>3</sub>-H<sub>2</sub>O<sup>+2</sup></b> | 300.2               | <b>LTI-28</b>                                    | 473.2               | <b>uLT-H<sub>2</sub>O</b>                        | 643.3 | <b>GuLTI-H<sub>2</sub>O</b>         | 964.4  | <b>b<sub>8</sub></b>                |
| 166.6 <sup>+2</sup> | <b>y<sub>3</sub>-NH<sub>3</sub><sup>+2</sup></b> | 302.2               | <b>TIS</b>                                       | 474.3               | <b>LTISS-28</b>                                  | 649.3 | <b>a<sub>5</sub></b>                | 1021.5 | <b>y<sub>8</sub>-H<sub>2</sub>O</b> |
| 169.1               | <b>b<sub>2</sub>-H<sub>2</sub>O</b>              | 306.1               | <b>Gu-28</b>                                     | 476.2               | <b>TISSD-28</b>                                  | 650.3 | <b>y<sub>6</sub></b>                | 1022.5 | <b>y<sub>8</sub>-NH<sub>3</sub></b> |
| 173.1               | <b>IS-28</b>                                     | 310.2               | <b>LTI-H<sub>2</sub>O</b>                        | 484.3               | <b>LTISS-H<sub>2</sub>O</b>                      | 659.3 | <b>b<sub>5</sub>-H<sub>2</sub>O</b> | 1039.5 | <b>y<sub>8</sub></b>                |
| 175.1               | <b>SS</b>                                        | 316.7 <sup>+2</sup> | <b>y<sub>6</sub>-H<sub>2</sub>O<sup>+2</sup></b> | 486.2               | <b>TISSD-H<sub>2</sub>O</b>                      | 661.3 | <b>GuLTI</b>                        | 1051.5 | <b>a<sub>9</sub></b>                |
| 175.1               | <b>SD-28</b>                                     | 317.2 <sup>+2</sup> | <b>y<sub>6</sub>-NH<sub>3</sub><sup>+2</sup></b> | 491.2               | <b>uLT</b>                                       | 663.4 | <b>uLTIS-28</b>                     | 1061.5 | <b>b<sub>9</sub>-H<sub>2</sub>O</b> |
| 175.1 <sup>+2</sup> | <b>y<sub>3</sub><sup>+2</sup></b>                | 325.7 <sup>+2</sup> | <b>y<sub>6</sub><sup>+2</sup></b>                | 502.3               | <b>LTISS</b>                                     | 673.3 | <b>uLTIS-H<sub>2</sub>O</b>         | 1078.5 | <b>y<sub>9</sub>-H<sub>2</sub>O</b> |
| 183.1               | <b>IS-H<sub>2</sub>O</b>                         | 328.2               | <b>LTI</b>                                       | 504.2               | <b>TISSD</b>                                     | 677.3 | <b>b<sub>5</sub></b>                | 1079.5 | <b>b<sub>9</sub></b>                |
| 185.1               | <b>SD-H<sub>2</sub>O</b>                         | 331.2               | <b>y<sub>3</sub>-H<sub>2</sub>O</b>              | 511.3 <sup>+2</sup> | <b>y<sub>8</sub>-H<sub>2</sub>O<sup>+2</sup></b> | 691.4 | <b>uLTIS</b>                        | 1079.5 | <b>y<sub>9</sub>-NH<sub>3</sub></b> |
| 187.1               | <b>b<sub>2</sub></b>                             | 332.1               | <b>y<sub>3</sub>-NH<sub>3</sub></b>              | 511.8 <sup>+2</sup> | <b>y<sub>8</sub>-NH<sub>3</sub><sup>+2</sup></b> | 720.4 | <b>GuLTIS-28</b>                    | 1096.5 | <b>y<sub>9</sub></b>                |
| 187.1               | <b>LT-28</b>                                     | 334.1               | <b>Gu</b>                                        | 520.3               | <b>GuLT-28</b>                                   | 730.4 | <b>GuLTIS-H<sub>2</sub>O</b>        | 1207.6 | <b>MH-H<sub>2</sub>O</b>            |
| 187.1               | <b>TI-28</b>                                     | 349.2               | <b>y<sub>3</sub></b>                             | 520.3 <sup>+2</sup> | <b>y<sub>8</sub><sup>+2</sup></b>                | 745.4 | <b>y<sub>7</sub>-H<sub>2</sub>O</b> | 1208.6 | <b>MH-NH<sub>3</sub></b>            |
| 197.1               | <b>LT-H<sub>2</sub>O</b>                         | 361.2               | <b>TISS-28</b>                                   | 530.2               | <b>GuLT-H<sub>2</sub>O</b>                       | 746.4 | <b>y<sub>7</sub>-NH<sub>3</sub></b> | 1225.6 | <b>MH</b>                           |
| 197.1               | <b>TI-H<sub>2</sub>O</b>                         | 362.2               | <b>uL-28</b>                                     | 531.3               | <b>y<sub>5</sub>-H<sub>2</sub>O</b>              | 748.4 | <b>GuLTIS</b>                       |        |                                     |
| 201.1               | <b>IS</b>                                        | 371.2               | <b>TISS-H<sub>2</sub>O</b>                       | 532.3               | <b>y<sub>5</sub>-NH<sub>3</sub></b>              | 750.4 | <b>uLTISS-28</b>                    |        |                                     |

## INITK

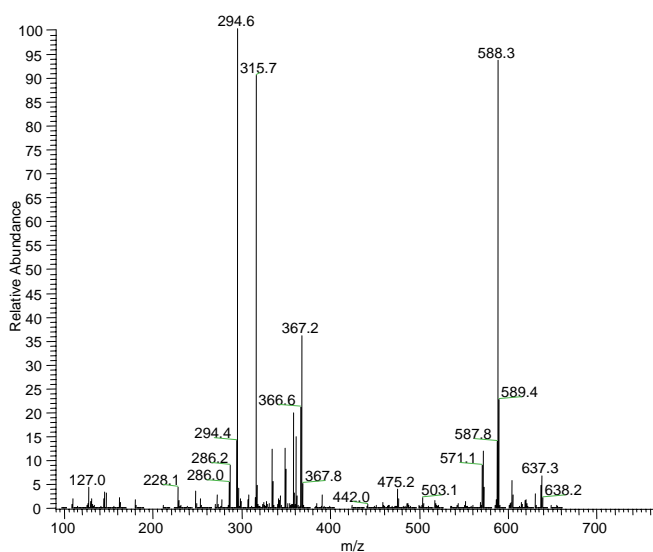

|                    |                                                  |       |                                     |       |                                     |                     |                                       |       |                                     |
|--------------------|--------------------------------------------------|-------|-------------------------------------|-------|-------------------------------------|---------------------|---------------------------------------|-------|-------------------------------------|
| 65.6 <sup>+2</sup> | <b>y<sub>1</sub>-NH<sub>3</sub><sup>+2</sup></b> | 129.1 | <b>K</b>                            | 231.1 | <b>y<sub>2</sub>-NH<sub>3</sub></b> | 366.7 <sup>+2</sup> | <b>MH-H<sub>2</sub>O<sup>+2</sup></b> | 576.3 | <b>a<sub>4</sub></b>                |
| 74.1               | <b>T</b>                                         | 130.1 | <b>y<sub>1</sub>-NH<sub>3</sub></b> | 248.2 | <b>y<sub>2</sub></b>                | 367.2 <sup>+2</sup> | <b>MH-NH<sub>3</sub><sup>+2</sup></b> | 586.3 | <b>b<sub>4</sub>-H<sub>2</sub>O</b> |

|                     |                                                  |                     |                                                  |                     |                                                  |                     |                           |       |                                     |
|---------------------|--------------------------------------------------|---------------------|--------------------------------------------------|---------------------|--------------------------------------------------|---------------------|---------------------------|-------|-------------------------------------|
| 74.1 <sup>+2</sup>  | <b>y<sub>1</sub><sup>+2</sup></b>                | 147.1               | <b>y<sub>1</sub></b>                             | 310.2 <sup>+2</sup> | <b>y<sub>4</sub>-H<sub>2</sub>O<sup>+2</sup></b> | 375.7 <sup>+2</sup> | <b>MH<sup>+2</sup></b>    | 604.3 | <b>b<sub>4</sub></b>                |
| 84.1                | <b>K</b>                                         | 172.1 <sup>+2</sup> | <b>y<sub>3</sub>-H<sub>2</sub>O<sup>+2</sup></b> | 310.7 <sup>+2</sup> | <b>y<sub>4</sub>-NH<sub>3</sub><sup>+2</sup></b> | 390.2               | <b>uI</b>                 | 619.3 | <b>y<sub>4</sub>-H<sub>2</sub>O</b> |
| 86.1                | <b>I</b>                                         | 172.6 <sup>+2</sup> | <b>y<sub>3</sub>-NH<sub>3</sub><sup>+2</sup></b> | 319.2 <sup>+2</sup> | <b>y<sub>4</sub><sup>+2</sup></b>                | 390.2               | <b>b<sub>2</sub></b>      | 620.3 | <b>y<sub>4</sub>-NH<sub>3</sub></b> |
| 101.1               | <b>K</b>                                         | 181.1 <sup>+2</sup> | <b>y<sub>3</sub><sup>+2</sup></b>                | 343.2               | <b>y<sub>3</sub>-H<sub>2</sub>O</b>              | 463.2               | <b>uIT-28</b>             | 637.3 | <b>y<sub>4</sub></b>                |
| 115.6 <sup>+2</sup> | <b>y<sub>2</sub>-H<sub>2</sub>O<sup>+2</sup></b> | 187.1               | <b>IT-28</b>                                     | 344.2               | <b>y<sub>3</sub>-NH<sub>3</sub></b>              | 473.2               | <b>uIT-H<sub>2</sub>O</b> | 732.4 | <b>MH-H<sub>2</sub>O</b>            |
| 116.1 <sup>+2</sup> | <b>y<sub>2</sub>-NH<sub>3</sub><sup>+2</sup></b> | 197.1               | <b>IT-H<sub>2</sub>O</b>                         | 361.2               | <b>y<sub>3</sub></b>                             | 475.3               | <b>a<sub>3</sub></b>      | 733.4 | <b>MH-NH<sub>3</sub></b>            |
| 124.6 <sup>+2</sup> | <b>y<sub>2</sub><sup>+2</sup></b>                | 215.1               | <b>IT</b>                                        | 362.2               | <b>a<sub>2</sub></b>                             | 491.2               | <b>uIT</b>                | 750.4 | <b>MH</b>                           |
| 126.1               | <b>K</b>                                         | 230.1               | <b>y<sub>2</sub>-H<sub>2</sub>O</b>              | 362.2               | <b>uI-28</b>                                     | 503.3               | <b>b<sub>3</sub></b>      |       |                                     |

## AGVDGENSDSDATNNANLTIK

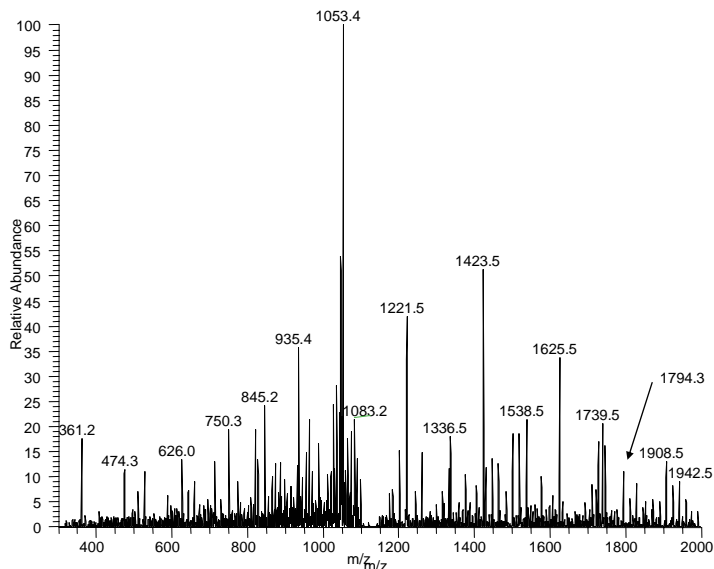

|                    |                                                  |                     |                                                  |       |                                    |       |                                            |        |                                                     |
|--------------------|--------------------------------------------------|---------------------|--------------------------------------------------|-------|------------------------------------|-------|--------------------------------------------|--------|-----------------------------------------------------|
| 60.0               | <b>S</b>                                         | 400.2               | <b>b<sub>5</sub></b>                             | 687.2 | <b>GENSD<br/>SD-H<sub>2</sub>O</b> | 964.3 | <b>DGENS<br/>DSDAT-<br/>28</b>             | 1362.5 | <b>NSDSD<br/>ATNNA<br/>uL-NH<sub>3</sub></b>        |
| 65.6 <sup>+2</sup> | <b>y<sub>1</sub>-NH<sub>3</sub><sup>+2</sup></b> | 401.2               | <b>VDGE</b>                                      | 687.2 | <b>DGENS<br/>DS-H<sub>2</sub>O</b> | 972.4 | <b>VDGEN<br/>SDSDA-<br/>H<sub>2</sub>O</b> | 1362.5 | <b>VDGEN<br/>SDSDA<br/>TNNA-<br/>28</b>             |
| 72.1               | <b>V</b>                                         | 401.2               | <b>ATNN</b>                                      | 688.2 | <b>GENSD<br/>SD-NH<sub>3</sub></b> | 972.4 | <b>NSDSD<br/>ATNNA-<br/>H<sub>2</sub>O</b> | 1364.6 | <b>DSDAT<br/>NNAuL<br/>TI-28</b>                    |
| 74.1               | <b>T</b>                                         | 401.2               | <b>TNNA</b>                                      | 688.2 | <b>DGENS<br/>DS-NH<sub>3</sub></b> | 973.3 | <b>VDGEN<br/>SDSDA-<br/>NH<sub>3</sub></b> | 1366.6 | <b>SDSDA<br/>TNNAu<br/>LT</b>                       |
| 74.1 <sup>+2</sup> | <b>y<sub>1</sub><sup>+2</sup></b>                | 402.2               | <b>DATN</b>                                      | 689.3 | <b>VDGEN<br/>SD-28</b>             | 973.3 | <b>NSDSD<br/>ATNNA-<br/>NH<sub>3</sub></b> | 1367.5 | <b>ENSDDS<br/>DATNN<br/>Au-28</b>                   |
| 84.1               | <b>K</b>                                         | 402.2 <sup>+2</sup> | <b>y<sub>6</sub>-H<sub>2</sub>O<sup>+2</sup></b> | 689.3 | <b>NNAuL</b>                       | 973.3 | <b>GENSD<br/>SDATN-<br/>H<sub>2</sub>O</b> | 1372.5 | <b>VDGEN<br/>SDSDA<br/>TNNA-<br/>H<sub>2</sub>O</b> |
| 86.1               | <b>L</b>                                         | 402.7 <sup>+2</sup> | <b>y<sub>6</sub>-NH<sub>3</sub><sup>+2</sup></b> | 690.3 | <b>DSDAT<br/>NN-28</b>             | 974.3 | <b>DGENS<br/>DSDAT-<br/>H<sub>2</sub>O</b> | 1373.5 | <b>VDGEN<br/>SDSDA<br/>TNNA-<br/>NH<sub>3</sub></b> |



|                     |                                               |                     |                                  |                     |                                                                |                      |                                                                |        |                                              |
|---------------------|-----------------------------------------------|---------------------|----------------------------------|---------------------|----------------------------------------------------------------|----------------------|----------------------------------------------------------------|--------|----------------------------------------------|
| 86.1                | I                                             | 404.1               | NSDS                             | 691.3               | SDSDA<br>TN                                                    | 974.3                | GENSD<br>SDATN-<br>NH <sub>3</sub>                             | 1374.6 | DSDAT<br>NNAuL<br>TI-H <sub>2</sub> O        |
| 87.1                | N                                             | 405.1               | SDSD                             | 691.3               | NSDSD<br>AT                                                    | 975.3                | DGENS<br>DSDAT-<br>NH <sub>3</sub>                             | 1375.6 | DSDAT<br>NNAuL<br>TI-NH <sub>3</sub>         |
| 88.0                | D                                             | 411.2 <sup>+2</sup> | y <sub>6</sub> <sup>+2</sup>     | 691.3               | ENSDS<br>DA-28                                                 | 976.3                | GVDGE<br>NSDSD                                                 | 1376.5 | GVDGE<br>NSDSD<br>ATNN                       |
| 101.1               | a <sub>2</sub>                                | 416.1               | DGEN                             | 699.3               | VDGEN<br>SD-H <sub>2</sub> O                                   | 976.4                | DATNN<br>AuL                                                   | 1377.5 | ENSDS<br>DATNN<br>Au-H <sub>2</sub> O        |
| 101.1               | K                                             | 418.2               | ENSD-<br>28                      | 700.2               | VDGEN<br>SD-NH <sub>3</sub>                                    | 976.5                | TNNAu<br>LTI-28                                                | 1378.5 | ENSDS<br>DATNN<br>Au-NH <sub>3</sub>         |
| 102.1               | E                                             | 428.1               | ENSD-<br>H <sub>2</sub> O        | 700.3               | DSDAT<br>NN-H <sub>2</sub> O                                   | 986.5                | TNNAu<br>LTI-H <sub>2</sub> O                                  | 1379.6 | NSDSD<br>ATNNA<br>uL                         |
| 122.1 <sup>+2</sup> | y <sub>2</sub> -NH <sub>3</sub> <sup>+2</sup> | 429.1               | ENSD-<br>NH <sub>3</sub>         | 701.2               | DSDAT<br>NN-NH <sub>3</sub>                                    | 987.5                | TNNAu<br>LTI-NH <sub>3</sub>                                   | 1390.5 | VDGEN<br>SDSDA<br>TNNA                       |
| 126.1               | K                                             | 430.2               | GVDGE-<br>28                     | 701.2               | ENSDS<br>DA-H <sub>2</sub> O                                   | 990.4                | VDGEN<br>SDSDA                                                 | 1392.6 | DSDAT<br>NNAuL<br>TI                         |
| 129.1               | b <sub>2</sub>                                | 433.2               | AuL-28                           | 702.2               | ENSDS<br>DA-NH <sub>3</sub>                                    | 990.4                | NSDSD<br>ATNNA                                                 | 1395.5 | ENSDS<br>DATNN<br>Au                         |
| 129.1               | GV-28                                         | 434.2               | NAu-28                           | 702.3               | a <sub>8</sub>                                                 | 991.4                | GENSD<br>SDATN                                                 | 1402.5 | a <sub>15</sub> -NH <sub>3</sub>             |
| 129.1               | K                                             | 440.2               | GVDGE-<br>H <sub>2</sub> O       | 703.3 <sup>+2</sup> | y <sub>12</sub> <sup>-</sup><br>H <sub>2</sub> O <sup>+2</sup> | 992.3                | DGENS<br>DSDAT                                                 | 1405.7 | y <sub>12</sub> -H <sub>2</sub> O            |
| 130.1               | y <sub>1</sub> -NH <sub>3</sub>               | 444.2               | ATNNA-<br>28                     | 703.8 <sup>+2</sup> | y <sub>12</sub> <sup>-</sup><br>NH <sub>3</sub> <sup>+2</sup>  | 1002.4               | a <sub>11</sub> -NH <sub>3</sub>                               | 1406.7 | y <sub>12</sub> -NH <sub>3</sub>             |
| 130.6 <sup>+2</sup> | y <sub>2</sub> <sup>+2</sup>                  | 445.2               | NAu-<br>NH <sub>3</sub>          | 705.2               | DGENS<br>DS                                                    | 1004.5               | TNNAu<br>LTI                                                   | 1419.6 | a <sub>15</sub>                              |
| 145.1               | DG-28                                         | 446.2               | ENSD                             | 705.2               | GENSD<br>SD                                                    | 1011.9 <sup>+2</sup> | y <sub>18</sub> <sup>-</sup><br>H <sub>2</sub> O <sup>+2</sup> | 1419.6 | GVDGE<br>NSDSD<br>ATNNA-<br>28               |
| 145.1               | AT-28                                         | 448.2               | SDSDA-<br>28                     | 712.3               | b <sub>8</sub> -H <sub>2</sub> O                               | 1012.4 <sup>+2</sup> | y <sub>18</sub> <sup>-</sup><br>NH <sub>3</sub> <sup>+2</sup>  | 1423.7 | y <sub>12</sub>                              |
| 147.1               | y <sub>1</sub>                                | 454.2               | ATNNA-<br>H <sub>2</sub> O       | 712.4 <sup>+2</sup> | y <sub>12</sub> <sup>+2</sup>                                  | 1019.4               | GVDGE<br>NSDSD<br>A-28                                         | 1424.5 | GENSD<br>SDATN<br>NAu-28                     |
| 155.0               | DG-H <sub>2</sub> O                           | 455.2               | ATNNA-<br>NH <sub>3</sub>        | 713.3               | b <sub>8</sub> -NH <sub>3</sub>                                | 1019.4               | a <sub>11</sub>                                                | 1429.5 | GVDGE<br>NSDSD<br>ATNNA-<br>H <sub>2</sub> O |
| 155.1               | AT-H <sub>2</sub> O                           | 456.3               | y <sub>4</sub> -H <sub>2</sub> O | 717.3               | VDGEN<br>SD                                                    | 1020.4               | ENSDS<br>DATNN-<br>28                                          | 1429.5 | b <sub>15</sub> -H <sub>2</sub> O            |
| 157.1               | GV                                            | 457.3               | y <sub>4</sub> -NH <sub>3</sub>  | 718.3               | DSDAT<br>NN                                                    | 1021.0 <sup>+2</sup> | y <sub>18</sub> <sup>+2</sup>                                  | 1430.5 | b <sub>15</sub> -NH <sub>3</sub>             |
| 158.1               | NA-28                                         | 458.2               | SDSDA-<br>H <sub>2</sub> O       | 719.2               | ENSDS<br>DA                                                    | 1029.4               | b <sub>11</sub> -H <sub>2</sub> O                              | 1430.5 | GVDGE<br>NSDSD<br>ATNNA-<br>NH <sub>3</sub>  |

|                            |                                                |                            |                                                |                     |                                                     |        |                                      |        |                                             |
|----------------------------|------------------------------------------------|----------------------------|------------------------------------------------|---------------------|-----------------------------------------------------|--------|--------------------------------------|--------|---------------------------------------------|
| 159.1                      | DA-28                                          | 458.2                      | GVDGE                                          | 720.3               | ATNNA<br>u-28                                       | 1029.4 | GVDGE<br>NSDSD<br>A-H <sub>2</sub> O | 1434.5 | GENSD<br>SDATN<br>NAu-<br>H <sub>2</sub> O  |
| 159.1                      | GE-28                                          | 459.3 <sup>+2</sup>        | y <sub>7</sub> -H <sub>2</sub> O <sup>+2</sup> | 730.3               | ATNNA<br>u-H <sub>2</sub> O                         | 1030.4 | b <sub>11</sub> -NH <sub>3</sub>     | 1435.5 | GENSD<br>SDATN<br>NAu-<br>NH <sub>3</sub>   |
| 169.1                      | DA-H <sub>2</sub> O                            | 459.7 <sup>+2</sup>        | y <sub>7</sub> -NH <sub>3</sub> <sup>+2</sup>  | 730.3               | b <sub>8</sub>                                      | 1030.4 | GVDGE<br>NSDSD<br>A-NH <sub>3</sub>  | 1447.6 | GVDGE<br>NSDSD<br>ATNNA                     |
| 169.1                      | NA-NH <sub>3</sub>                             | 461.2                      | SDATN-<br>28                                   | 731.3               | ATNNA<br>u-NH <sub>3</sub>                          | 1030.4 | ENSDDS<br>DATNN-<br>H <sub>2</sub> O | 1447.6 | b <sub>15</sub>                             |
| 169.1                      | GE-H <sub>2</sub> O                            | 461.2                      | AuL                                            | 732.4               | y <sub>5</sub> -H <sub>2</sub> O                    | 1031.4 | ENSDDS<br>DATNN-<br>NH <sub>3</sub>  | 1451.6 | SDSDA<br>TNNAu<br>LTI-28                    |
| 172.1 <sup>+2</sup>        | y <sub>3</sub> -H <sub>2</sub> O <sup>+2</sup> | 462.2                      | DSDAT-<br>28                                   | 733.4               | y <sub>5</sub> -NH <sub>3</sub>                     | 1031.5 | y <sub>8</sub> -H <sub>2</sub> O     | 1452.5 | GENSD<br>SDATN<br>NAu                       |
| 172.6 <sup>+2</sup>        | y <sub>3</sub> -NH <sub>3</sub> <sup>+2</sup>  | 462.2                      | NAu                                            | 746.3               | GVDGE<br>NSD-28                                     | 1032.5 | y <sub>8</sub> -NH <sub>3</sub>      | 1452.6 | NSDSD<br>ATNNA<br>uLT-28                    |
| 173.1                      | DG                                             | 463.2                      | uLT-28                                         | 748.3               | GENSD<br>SDA-28                                     | 1035.5 | SDATN<br>NAuL-<br>28                 | 1461.6 | SDSDA<br>TNNAu<br>LTI-H <sub>2</sub> O      |
| 173.1                      | AT                                             | 468.255<br>8 <sup>+2</sup> | y <sub>7</sub> <sup>+2</sup>                   | 748.3               | ATNNA<br>u                                          | 1037.4 | DSDAT<br>NNAu-<br>28                 | 1462.6 | NSDSD<br>ATNNA<br>uLT-<br>H <sub>2</sub> O  |
| 174.1                      | NS-28                                          | 471.2                      | SDATN-<br>H <sub>2</sub> O                     | 750.4               | y <sub>5</sub>                                      | 1045.4 | SDATN<br>NAuL-<br>H <sub>2</sub> O   | 1462.6 | SDSDA<br>TNNAu<br>LTI-NH <sub>3</sub>       |
| 175.1                      | SD-28                                          | 472.2                      | DSDAT-<br>H <sub>2</sub> O                     | 756.3               | GVDGE<br>NSD-<br>H <sub>2</sub> O                   | 1046.4 | SDATN<br>NAuL-<br>NH <sub>3</sub>    | 1463.6 | NSDSD<br>ATNNA<br>uLT-<br>NH <sub>3</sub>   |
| 175.1                      | DS-28                                          | 472.2                      | SDATN-<br>NH <sub>3</sub>                      | 757.3               | GVDGE<br>NSD-<br>NH <sub>3</sub>                    | 1047.4 | DSDAT<br>NNAu-<br>H <sub>2</sub> O   | 1473.6 | a <sub>16</sub> -NH <sub>3</sub>            |
| 181.125<br>9 <sup>+2</sup> | y <sub>3</sub> <sup>+2</sup>                   | 472.2                      | ATNNA                                          | 758.3               | GENSD<br>SDA-<br>H <sub>2</sub> O                   | 1047.4 | b <sub>11</sub>                      | 1479.6 | SDSDA<br>TNNAu<br>LTI                       |
| 184.1                      | NS-H <sub>2</sub> O                            | 473.2                      | uLT-<br>H <sub>2</sub> O                       | 759.2               | GENSD<br>SDA-<br>NH <sub>3</sub>                    | 1047.4 | GVDGE<br>NSDSD<br>A                  | 1480.6 | NSDSD<br>ATNNA<br>uLT                       |
| 185.1                      | SD-H <sub>2</sub> O                            | 474.3                      | y <sub>4</sub>                                 | 760.9 <sup>+2</sup> | y <sub>13</sub> -<br>H <sub>2</sub> O <sup>+2</sup> | 1047.5 | ATNNA<br>uLTI-28                     | 1480.6 | ENSDDS<br>DATNN<br>AuL-28                   |
| 185.1                      | DS-H <sub>2</sub> O                            | 475.2                      | GENSD-<br>28                                   | 761.3               | DSDAT<br>NNA-28                                     | 1048.4 | DSDAT<br>NNAu-<br>NH <sub>3</sub>    | 1490.6 | ENSDDS<br>DATNN<br>AuL-<br>H <sub>2</sub> O |
| 185.1                      | NS-NH <sub>3</sub>                             | 475.2                      | DGENS-<br>28                                   | 761.4 <sup>+2</sup> | y <sub>13</sub> -<br>NH <sub>3</sub> <sup>+2</sup>  | 1048.4 | ENSDDS<br>DATNN                      | 1490.6 | a <sub>16</sub>                             |

|       |                     |       |                        |                     |                               |                      |                                                             |        |                                   |
|-------|---------------------|-------|------------------------|---------------------|-------------------------------|----------------------|-------------------------------------------------------------|--------|-----------------------------------|
| 186.1 | NA                  | 476.2 | SDSDA                  | 761.4               | NAuLTI-28                     | 1049.5               | DATNN AuLT-28                                               | 1491.6 | ENSDDS DATNN AuL-NH <sub>3</sub>  |
| 187.1 | DA                  | 485.2 | GENSD-H <sub>2</sub> O | 762.4               | NNAuL T-28                    | 1049.5               | y <sub>8</sub>                                              | 1500.6 | b <sub>16</sub> -H <sub>2</sub> O |
| 187.1 | GE                  | 485.2 | DGENS-H <sub>2</sub> O | 762.4               | TNNAu L-28                    | 1057.5               | ATNNA uLTI-H <sub>2</sub> O                                 | 1501.6 | b <sub>16</sub> -NH <sub>3</sub>  |
| 187.1 | VD-28               | 486.1 | GENSD-NH <sub>3</sub>  | 769.9 <sup>+2</sup> | y <sub>13</sub> <sup>+2</sup> | 1058.5               | ATNNA uLTI-NH <sub>3</sub>                                  | 1508.6 | ENSDDS DATNN AuL                  |
| 187.1 | LT-28               | 486.1 | DGENS-NH <sub>3</sub>  | 771.3               | DSDAT NNA-H <sub>2</sub> O    | 1059.5               | DATNN AuLT-H <sub>2</sub> O                                 | 1518.6 | b <sub>16</sub>                   |
| 187.1 | TI-28               | 487.2 | VDGEN-28               | 771.4               | NAuLTI-H <sub>2</sub> O       | 1060.4               | DATNN AuLT-NH <sub>3</sub>                                  | 1520.7 | y <sub>13</sub> -H <sub>2</sub> O |
| 188.1 | TN-28               | 488.2 | DATNN-28               | 772.3               | DSDAT NNA-NH <sub>3</sub>     | 1061.5 <sup>+2</sup> | y <sub>19</sub> <sup>-</sup> H <sub>2</sub> O <sup>+2</sup> | 1521.7 | y <sub>13</sub> -NH <sub>3</sub>  |
| 197.1 | VD-H <sub>2</sub> O | 489.2 | SDATN                  | 772.3               | NNAuL T-H <sub>2</sub> O      | 1062.0 <sup>+2</sup> | y <sub>19</sub> <sup>-</sup> NH <sub>3</sub> <sup>+2</sup>  | 1537.6 | GENSD SDATN NAuL-28               |
| 197.1 | LT-H <sub>2</sub> O | 490.2 | DSDAT                  | 772.3               | TNNAu L-H <sub>2</sub> O      | 1063.4               | VDGEN SDSDA T-28                                            | 1538.7 | y <sub>13</sub>                   |
| 197.1 | TI-H <sub>2</sub> O | 491.2 | NSDSD-28               | 772.4               | NAuLTI-NH <sub>3</sub>        | 1063.5               | SDATN NAuL                                                  | 1539.6 | DGENS DSDAT NNAu-28               |
| 198.1 | TN-H <sub>2</sub> O | 491.2 | uLT                    | 773.3               | TNNAu L-NH <sub>3</sub>       | 1065.4               | DSDAT NNAu                                                  | 1547.6 | GENSD SDATN NAuL-H <sub>2</sub> O |
| 199.1 | TN-NH <sub>3</sub>  | 497.2 | VDGEN-H <sub>2</sub> O | 773.3               | NNAuL T-NH <sub>3</sub>       | 1070.5 <sup>+2</sup> | y <sub>19</sub> <sup>+2</sup>                               | 1548.6 | GENSD SDATN NAuL-NH <sub>3</sub>  |
| 200.1 | a <sub>3</sub>      | 498.2 | VDGEN-NH <sub>3</sub>  | 774.3               | GVDGE NSD                     | 1073.4               | VDGEN SDSDA T-H <sub>2</sub> O                              | 1549.6 | DGENS DSDAT NNAu-H <sub>2</sub> O |
| 201.1 | NN-28               | 498.2 | DATNN-H <sub>2</sub> O | 776.3               | GENSD SDA                     | 1073.4               | a <sub>12</sub> -NH <sub>3</sub>                            | 1550.5 | DGENS DSDAT NNAu-NH <sub>3</sub>  |
| 202.1 | NS                  | 499.2 | DATNN-NH <sub>3</sub>  | 776.3               | VDGEN SDS-28                  | 1074.4               | VDGEN SDSDA T-NH <sub>3</sub>                               | 1565.6 | GENSD SDATN NAuL                  |
| 203.1 | DS                  | 501.2 | NSDSD-H <sub>2</sub> O | 777.3               | NSDSD ATN-28                  | 1075.5               | ATNNA uLTI                                                  | 1565.7 | NSDSD ATNNA uLTI-28               |
| 203.1 | SD                  | 501.2 | a <sub>6</sub>         | 777.3               | SDSDA TNN-28                  | 1077.4               | GENSD SDATN N-28                                            | 1567.6 | DGENS DSDAT NNAu                  |

|                     |                                                  |                     |                                                  |       |                                     |                      |                                                              |        |                                         |
|---------------------|--------------------------------------------------|---------------------|--------------------------------------------------|-------|-------------------------------------|----------------------|--------------------------------------------------------------|--------|-----------------------------------------|
| 212.1               | <b>NN-NH<sub>3</sub></b>                         | 502.1               | <b>NSDSD-NH<sub>3</sub></b>                      | 786.3 | <b>VDGEN SDS-H<sub>2</sub>O</b>     | 1077.5               | <b>DATNN AuLT</b>                                            | 1575.7 | <b>NSDSD ATNNA uLTi-H<sub>2</sub>O</b>  |
| 215.1               | <b>VD</b>                                        | 503.2               | <b>GENSD</b>                                     | 787.3 | <b>VDGEN SDS-NH<sub>3</sub></b>     | 1078.4               | <b>DGENS DSDAT N-28</b>                                      | 1576.7 | <b>NSDSD ATNNA uLTi-NH<sub>3</sub></b>  |
| 215.1               | <b>LT</b>                                        | 503.2               | <b>DGENS</b>                                     | 787.3 | <b>NSDSD ATN-H<sub>2</sub>O</b>     | 1087.4               | <b>GENSD SDATN N-H<sub>2</sub>O</b>                          | 1581.7 | <b>ENSDDS DATNN AuLT-28</b>             |
| 215.1               | <b>TI</b>                                        | 505.2               | <b>ENSDDS-28</b>                                 | 787.3 | <b>SDSDA TNN-H<sub>2</sub>O</b>     | 1088.4               | <b>GENSD SDATN N-NH<sub>3</sub></b>                          | 1591.6 | <b>ENSDDS DATNN AuLT-H<sub>2</sub>O</b> |
| 216.1               | <b>TN</b>                                        | 511.2               | <b>b<sub>6</sub>-H<sub>2</sub>O</b>              | 788.3 | <b>SDSDA TNN-NH<sub>3</sub></b>     | 1088.4               | <b>DGENS DSDAT N-H<sub>2</sub>O</b>                          | 1592.6 | <b>ENSDDS DATNN AuLT-NH<sub>3</sub></b> |
| 216.1               | <b>EN-28</b>                                     | 515.2               | <b>ENSDDS-H<sub>2</sub>O</b>                     | 788.3 | <b>NSDSD ATN-NH<sub>3</sub></b>     | 1089.4               | <b>DGENS DSDAT N-NH<sub>3</sub></b>                          | 1593.7 | <b>NSDSD ATNNA uLTi</b>                 |
| 226.1               | <b>EN-H<sub>2</sub>O</b>                         | 515.2               | <b>VDGEN</b>                                     | 789.3 | <b>DSDAT NNA</b>                    | 1090.0 <sup>+2</sup> | <b>y<sub>20</sub><sup>-</sup>H<sub>2</sub>O<sup>+2</sup></b> | 1607.7 | <b>y<sub>14</sub>-H<sub>2</sub>O</b>    |
| 227.1               | <b>EN-NH<sub>3</sub></b>                         | 516.2               | <b>ENSDDS-NH<sub>3</sub></b>                     | 789.4 | <b>NAuLTi</b>                       | 1090.4               | <b>a<sub>12</sub></b>                                        | 1608.7 | <b>y<sub>14</sub>-NH<sub>3</sub></b>    |
| 228.1               | <b>b<sub>3</sub></b>                             | 516.2               | <b>DATNN</b>                                     | 790.4 | <b>TNNAuL</b>                       | 1090.5 <sup>+2</sup> | <b>y<sub>20</sub><sup>-</sup>NH<sub>3</sub><sup>+2</sup></b> | 1609.6 | <b>ENSDDS DATNN AuLT</b>                |
| 228.7 <sup>+2</sup> | <b>y<sub>4</sub>-H<sub>2</sub>O<sup>+2</sup></b> | 516.3 <sup>+2</sup> | <b>y<sub>8</sub>-H<sub>2</sub>O<sup>+2</sup></b> | 790.4 | <b>NNAuLT</b>                       | 1091.4               | <b>VDGEN SDSDA T</b>                                         | 1625.8 | <b>y<sub>14</sub></b>                   |
| 229.1               | <b>NN</b>                                        | 516.8 <sup>+2</sup> | <b>y<sub>8</sub>-NH<sub>3</sub><sup>+2</sup></b> | 792.3 | <b>DGENS DSD-28</b>                 | 1091.4               | <b>ENSDDS DATNN A-28</b>                                     | 1638.6 | <b>VDGEN SDSDA TNNAu-28</b>             |
| 229.2 <sup>+2</sup> | <b>y<sub>4</sub>-NH<sub>3</sub><sup>+2</sup></b> | 519.2               | <b>NSDSD</b>                                     | 792.3 | <b>ENSDDS DAT-28</b>                | 1099.0 <sup>+2</sup> | <b>y<sub>20</sub><sup>+2</sup></b>                           | 1638.7 | <b>GENSD SDATN NAuLT-28</b>             |
| 237.7 <sup>+2</sup> | <b>y<sub>4</sub><sup>+2</sup></b>                | 525.3 <sup>+2</sup> | <b>y<sub>8</sub><sup>+2</sup></b>                | 800.3 | <b>a<sub>9</sub>-NH<sub>3</sub></b> | 1100.4               | <b>b<sub>12</sub>-H<sub>2</sub>O</b>                         | 1648.6 | <b>VDGEN SDSDA TNNAu-H<sub>2</sub>O</b> |
| 243.2               | <b>y<sub>2</sub>-NH<sub>3</sub></b>              | 529.2               | <b>b<sub>6</sub></b>                             | 802.2 | <b>DGENS DSD-H<sub>2</sub>O</b>     | 1101.4               | <b>b<sub>12</sub>-NH<sub>3</sub></b>                         | 1648.7 | <b>GENSD SDATN NAuLT-H<sub>2</sub>O</b> |
| 244.1               | <b>EN</b>                                        | 533.2               | <b>ENSDDS</b>                                    | 802.3 | <b>ENSDDS DAT-H<sub>2</sub>O</b>    | 1101.4               | <b>ENSDDS DATNN A-H<sub>2</sub>O</b>                         | 1649.6 | <b>VDGEN SDSDA TNNAu-NH<sub>3</sub></b> |
| 244.1               | <b>GVD-28</b>                                    | 534.3               | <b>AuLT-28</b>                                   | 803.2 | <b>DGENS DSD-NH<sub>3</sub></b>     | 1102.4               | <b>ENSDDS DATNN A-NH<sub>3</sub></b>                         | 1649.6 | <b>GENSD SDATN NAuLT-NH<sub>3</sub></b> |
| 244.1               | <b>VDG-28</b>                                    | 544.2               | <b>GVDGE N-28</b>                                | 803.3 | <b>ENSDDS DAT-NH<sub>3</sub></b>    | 1105.4               | <b>GENSD SDATN N</b>                                         | 1652.7 | <b>DGENS DSDAT NNAuL-</b>               |

|       |                      |                     |                                                |                            |                                                     |                             |                                       |        |                                                   |
|-------|----------------------|---------------------|------------------------------------------------|----------------------------|-----------------------------------------------------|-----------------------------|---------------------------------------|--------|---------------------------------------------------|
|       |                      |                     |                                                |                            |                                                     |                             |                                       |        | 28                                                |
| 246.1 | SDA-28               | 544.3               | AuLT-H <sub>2</sub> O                          | 803.5                      | y <sub>6</sub> -H <sub>2</sub> O                    | 1106.4                      | DGENS<br>DSDAT<br>N                   | 1662.6 | DGENS<br>DSDAT<br>NNAuL-<br>H <sub>2</sub> O      |
| 254.1 | GVD-H <sub>2</sub> O | 547.3               | NAuL-28                                        | 804.3                      | VDGEN<br>SDS                                        | 1118.4                      | b <sub>12</sub>                       | 1663.6 | DGENS<br>DSDAT<br>NNAuL-<br>NH <sub>3</sub>       |
| 254.1 | VDG-H <sub>2</sub> O | 548.2               | NNAu-28                                        | 804.373<br>4 <sup>+2</sup> | y <sub>14</sub> -<br>H <sub>2</sub> O <sup>+2</sup> | 1119.4                      | ENS<br>SDS<br>DATNN<br>A              | 1666.6 | VDGEN<br>SDSDA<br>TNNAu                           |
| 256.1 | SDA-H <sub>2</sub> O | 549.2               | SDSDA<br>T-28                                  | 804.4                      | y <sub>6</sub> -NH <sub>3</sub>                     | 1120.4                      | GVDGE<br>NSDSD<br>AT-28               | 1666.7 | GENSD<br>SDATN<br>NAuLT                           |
| 259.1 | ATN-28               | 554.2               | GVDGE<br>N-H <sub>2</sub> O                    | 804.9 <sup>+2</sup>        | y <sub>14</sub> -<br>NH <sub>3</sub> <sup>+2</sup>  | 1124.4                      | SDSDA<br>TNNAu-<br>28                 | 1680.6 | DGENS<br>DSDAT<br>NNAuL                           |
| 260.1 | DAT-28               | 555.2               | GVDGE<br>N-NH <sub>3</sub>                     | 805.3                      | SDSDA<br>TNN                                        | 1125.50<br>38 <sup>+2</sup> | MH-<br>H <sub>2</sub> O <sup>+2</sup> | 1694.7 | ENS<br>SDS<br>DATNN<br>AuLTI-<br>28               |
| 260.2 | y <sub>2</sub>       | 558.2               | NAuL-<br>NH <sub>3</sub>                       | 805.3                      | NSDSD<br>ATN                                        | 1125.99<br>59 <sup>+2</sup> | MH-<br>NH <sub>3</sub> <sup>+2</sup>  | 1695.7 | GVDGE<br>NSDSD<br>ATNNA<br>u-28                   |
| 262.1 | SDS-28               | 559.2               | SDSDA<br>T-H <sub>2</sub> O                    | 813.4 <sup>+2</sup>        | y <sub>14</sub> <sup>+2</sup>                       | 1130.4                      | GVDGE<br>NSDSD<br>AT-H <sub>2</sub> O | 1704.7 | ENS<br>SDS<br>DATNN<br>AuLTI-<br>H <sub>2</sub> O |
| 269.1 | ATN-H <sub>2</sub> O | 559.2               | NNAu-<br>NH <sub>3</sub>                       | 817.3                      | a <sub>9</sub>                                      | 1131.4                      | GVDGE<br>NSDSD<br>AT-NH <sub>3</sub>  | 1705.6 | GVDGE<br>NSDSD<br>ATNNA<br>u-H <sub>2</sub> O     |
| 270.1 | DAT-H <sub>2</sub> O | 559.2               | DATNN<br>A-28                                  | 820.3                      | DGENS<br>DSD                                        | 1132.6                      | y <sub>9</sub> -H <sub>2</sub> O      | 1705.7 | ENS<br>SDS<br>DATNN<br>AuLTI-<br>NH <sub>3</sub>  |
| 270.1 | ATN-NH <sub>3</sub>  | 562.2               | NSDSD<br>A-28                                  | 820.3                      | ENS<br>SDS<br>DAT                                   | 1133.6                      | y <sub>9</sub> -NH <sub>3</sub>       | 1706.6 | GVDGE<br>NSDSD<br>ATNNA<br>u-NH <sub>3</sub>      |
| 272.1 | SDS-H <sub>2</sub> O | 562.2               | GENSD<br>S-28                                  | 821.5                      | y <sub>6</sub>                                      | 1134.4                      | SDSDA<br>TNNAu-<br>H <sub>2</sub> O   | 1721.8 | y <sub>15</sub> -H <sub>2</sub> O                 |
| 272.1 | GVD                  | 562.3               | AuLT                                           | 827.3                      | b <sub>9</sub> -H <sub>2</sub> O                    | 1134.50<br>91 <sup>+2</sup> | MH <sup>+2</sup>                      | 1722.7 | ENS<br>SDS<br>DATNN<br>AuLTI                      |
| 272.1 | VDG                  | 566.8 <sup>+2</sup> | y <sub>9</sub> -H <sub>2</sub> O <sup>+2</sup> | 828.3                      | b <sub>9</sub> -NH <sub>3</sub>                     | 1135.4                      | SDSDA<br>TNNAu-<br>NH <sub>3</sub>    | 1722.8 | y <sub>15</sub> -NH <sub>3</sub>                  |
| 272.1 | NNA-28               | 567.3 <sup>+2</sup> | y <sub>9</sub> -NH <sub>3</sub> <sup>+2</sup>  | 833.3                      | GVDGE<br>NSDS-<br>28                                | 1136.5                      | SDATN<br>NAuLT-<br>28                 | 1723.7 | GVDGE<br>NSDSD<br>ATNNA<br>u                      |

|       |                                |                     |                                   |       |                                           |        |                                              |        |                                                       |
|-------|--------------------------------|---------------------|-----------------------------------|-------|-------------------------------------------|--------|----------------------------------------------|--------|-------------------------------------------------------|
| 273.1 | <b>GEN-28</b>                  | 569.2               | <b>DATNN<br/>A-H<sub>2</sub>O</b> | 833.4 | <b>ATNNA<br/>uL-28</b>                    | 1146.5 | <b>SDATN<br/>NAuLT-<br/>H<sub>2</sub>O</b>   | 1739.8 | <b>y<sub>15</sub></b>                                 |
| 274.1 | <b>SDA</b>                     | 570.2               | <b>DATNN<br/>A-NH<sub>3</sub></b> | 835.3 | <b>DATNN<br/>Au-28</b>                    | 1147.5 | <b>SDATN<br/>NAuLT-<br/>NH<sub>3</sub></b>   | 1749.7 | <b>a<sub>17</sub>-NH<sub>3</sub></b>                  |
| 274.1 | <b>DGE-28</b>                  | 572.2               | <b>NSDSD<br/>A-H<sub>2</sub>O</b> | 843.3 | <b>GVDGE<br/>NSDS-<br/>H<sub>2</sub>O</b> | 1148.4 | <b>GVDGE<br/>NSDSD<br/>AT</b>                | 1751.7 | <b>VDGEN<br/>SDSDA<br/>TNNAu<br/>L-28</b>             |
| 283.1 | <b>NNA-<br/>NH<sub>3</sub></b> | 572.2               | <b>GENSD<br/>S-H<sub>2</sub>O</b> | 843.4 | <b>ATNNA<br/>uL-H<sub>2</sub>O</b>        | 1148.4 | <b>GENSD<br/>SDATN<br/>NA-28</b>             | 1751.8 | <b>GENSD<br/>SDATN<br/>NAuLTI-<br/>28</b>             |
| 283.1 | <b>GEN-<br/>H<sub>2</sub>O</b> | 572.2               | <b>GVDGE<br/>N</b>                | 844.3 | <b>GVDGE<br/>NSDS-<br/>NH<sub>3</sub></b> | 1150.5 | <b>DSDAT<br/>NNAuL-<br/>28</b>               | 1753.7 | <b>DGENS<br/>DSDAT<br/>NNAuL<br/>T-28</b>             |
| 284.1 | <b>DGE-<br/>H<sub>2</sub>O</b> | 573.2               | <b>NSDSD<br/>A-NH<sub>3</sub></b> | 844.4 | <b>ATNNA<br/>uL-NH<sub>3</sub></b>        | 1150.6 | <b>y<sub>9</sub></b>                         | 1761.7 | <b>VDGEN<br/>SDSDA<br/>TNNAu<br/>L-H<sub>2</sub>O</b> |
| 284.1 | <b>GEN-<br/>NH<sub>3</sub></b> | 573.2               | <b>GENSD<br/>S-NH<sub>3</sub></b> | 845.3 | <b>DATNN<br/>Au-H<sub>2</sub>O</b>        | 1152.4 | <b>SDSDA<br/>TNNAu</b>                       | 1761.7 | <b>GENSD<br/>SDATN<br/>NAuLTI-<br/>H<sub>2</sub>O</b> |
| 287.1 | <b>ATN</b>                     | 574.2               | <b>VDGEN<br/>S-28</b>             | 845.3 | <b>b<sub>9</sub></b>                      | 1158.4 | <b>GENSD<br/>SDATN<br/>NA-H<sub>2</sub>O</b> | 1762.7 | <b>VDGEN<br/>SDSDA<br/>TNNAu<br/>L-NH<sub>3</sub></b> |
| 288.1 | <b>DAT</b>                     | 575.2               | <b>SDATN<br/>N-28</b>             | 846.3 | <b>DATNN<br/>Au-NH<sub>3</sub></b>        | 1159.4 | <b>GENSD<br/>SDATN<br/>NA-NH<sub>3</sub></b> | 1762.7 | <b>GENSD<br/>SDATN<br/>NAuLTI-<br/>NH<sub>3</sub></b> |
| 289.1 | <b>NSD-28</b>                  | 575.3               | <b>NAuL</b>                       | 848.3 | <b>SDSDA<br/>TNNA-<br/>28</b>             | 1160.5 | <b>DSDAT<br/>NNAuL-<br/>H<sub>2</sub>O</b>   | 1763.7 | <b>DGENS<br/>DSDAT<br/>NNAuL<br/>T-H<sub>2</sub>O</b> |
| 290.1 | <b>DSD-28</b>                  | 575.8 <sup>+2</sup> | <b>y<sub>9</sub><sup>+2</sup></b> | 849.3 | <b>GENSD<br/>SDAT-<br/>28</b>             | 1161.5 | <b>DSDAT<br/>NNAuL-<br/>NH<sub>3</sub></b>   | 1764.7 | <b>DGENS<br/>DSDAT<br/>NNAuL<br/>T-NH<sub>3</sub></b> |
| 290.1 | <b>SDS</b>                     | 576.2               | <b>DSDAT<br/>N-28</b>             | 858.3 | <b>SDSDA<br/>TNNA-<br/>H<sub>2</sub>O</b> | 1162.6 | <b>DATNN<br/>AuLTI-<br/>28</b>               | 1766.7 | <b>a<sub>17</sub></b>                                 |
| 299.1 | <b>NSD-<br/>H<sub>2</sub>O</b> | 576.2               | <b>NNAu</b>                       | 859.3 | <b>SDSDA<br/>TNNA-<br/>NH<sub>3</sub></b> | 1164.5 | <b>SDATN<br/>NAuLT</b>                       | 1776.7 | <b>b<sub>17</sub>-H<sub>2</sub>O</b>                  |
| 300.1 | <b>DSD-<br/>H<sub>2</sub>O</b> | 576.3               | <b>uLTI-28</b>                    | 859.3 | <b>GENSD<br/>SDAT-<br/>H<sub>2</sub>O</b> | 1172.5 | <b>DATNN<br/>AuLTI-<br/>H<sub>2</sub>O</b>   | 1777.7 | <b>b<sub>17</sub>-NH<sub>3</sub></b>                  |
| 300.1 | <b>NSD-<br/>NH<sub>3</sub></b> | 577.2               | <b>SDSDA<br/>T</b>                | 860.3 | <b>GENSD<br/>SDAT-<br/>NH<sub>3</sub></b> | 1173.5 | <b>DATNN<br/>AuLTI-<br/>NH<sub>3</sub></b>   | 1779.7 | <b>VDGEN<br/>SDSDA<br/>TNNAu<br/>L</b>                |
| 300.1 | <b>NNA</b>                     | 584.2               | <b>VDGEN<br/>S-H<sub>2</sub>O</b> | 861.3 | <b>GVDGE<br/>NSDS</b>                     | 1174.4 | <b>a<sub>13</sub>-NH<sub>3</sub></b>         | 1779.8 | <b>GENSD<br/>SDATN<br/>NAuLTI</b>                     |

|       |                                 |                     |                                                                   |                     |                                                                   |        |                                              |        |                                                        |
|-------|---------------------------------|---------------------|-------------------------------------------------------------------|---------------------|-------------------------------------------------------------------|--------|----------------------------------------------|--------|--------------------------------------------------------|
| 300.2 | <b>LTI-28</b>                   | 585.2               | <b>VDGEN<br/>S-NH<sub>3</sub></b>                                 | 861.4               | <b>ATNNA<br/>uL</b>                                               | 1176.4 | <b>GENSD<br/>SDATN<br/>NA</b>                | 1781.7 | <b>DGENS<br/>DSDAT<br/>NNAuL<br/>T</b>                 |
| 301.1 | <b>GEN</b>                      | 585.2               | <b>SDATN<br/>N-H<sub>2</sub>O</b>                                 | 861.4 <sup>+2</sup> | <b>y<sub>15</sub><sup>-</sup><br/>H<sub>2</sub>O<sup>+2</sup></b> | 1177.5 | <b>VDGEN<br/>SDSDA<br/>TN-28</b>             | 1794.7 | <b>b<sub>17</sub></b>                                  |
| 301.2 | <b>GVDG-<br/>28</b>             | 586.2               | <b>DSDAT<br/>N-H<sub>2</sub>O</b>                                 | 861.9 <sup>+2</sup> | <b>y<sub>15</sub><sup>-</sup><br/>NH<sub>3</sub><sup>+2</sup></b> | 1178.5 | <b>DSDAT<br/>NNAuL</b>                       | 1808.7 | <b>GVDGE<br/>NSDSD<br/>ATNNA<br/>uL-28</b>             |
| 302.1 | <b>DGE</b>                      | 586.2               | <b>SDATN<br/>N-NH<sub>3</sub></b>                                 | 863.3               | <b>DGENS<br/>DSDA-<br/>28</b>                                     | 1187.4 | <b>VDGEN<br/>SDSDA<br/>TN-H<sub>2</sub>O</b> | 1818.7 | <b>GVDGE<br/>NSDSD<br/>ATNNA<br/>uL-H<sub>2</sub>O</b> |
| 302.1 | <b>TNN-28</b>                   | 586.3               | <b>uLTI-<br/>H<sub>2</sub>O</b>                                   | 863.3               | <b>DATNN<br/>Au</b>                                               | 1188.4 | <b>VDGEN<br/>SDSDA<br/>TN-NH<sub>3</sub></b> | 1819.7 | <b>GVDGE<br/>NSDSD<br/>ATNNA<br/>uL-NH<sub>3</sub></b> |
| 303.1 | <b>ENS-28</b>                   | 587.2               | <b>DSDAT<br/>N-NH<sub>3</sub></b>                                 | 863.4               | <b>TNNAu<br/>LT-28</b>                                            | 1190.6 | <b>DATNN<br/>AuLTI</b>                       | 1836.7 | <b>GVDGE<br/>NSDSD<br/>ATNNA<br/>uL</b>                |
| 310.2 | <b>LTI-H<sub>2</sub>O</b>       | 587.2               | <b>DATNN<br/>A</b>                                                | 870.4 <sup>+2</sup> | <b>y<sub>15</sub><sup>+2</sup></b>                                | 1191.5 | <b>a<sub>13</sub></b>                        | 1850.8 | <b>y<sub>16</sub><sup>-</sup>-H<sub>2</sub>O</b>       |
| 311.1 | <b>GVDG-<br/>H<sub>2</sub>O</b> | 590.2               | <b>NSDSD<br/>A</b>                                                | 873.3               | <b>DGENS<br/>DSDA-<br/>H<sub>2</sub>O</b>                         | 1192.4 | <b>DGENS<br/>DSDAT<br/>NN-28</b>             | 1851.8 | <b>y<sub>16</sub><sup>-</sup>-NH<sub>3</sub></b>       |
| 312.1 | <b>TNN-<br/>H<sub>2</sub>O</b>  | 590.2               | <b>DGENS<br/>D-28</b>                                             | 873.4               | <b>TNNAu<br/>LT-H<sub>2</sub>O</b>                                | 1201.5 | <b>b<sub>13</sub>-H<sub>2</sub>O</b>         | 1852.8 | <b>VDGEN<br/>SDSDA<br/>TNNAu<br/>LT-28</b>             |
| 313.1 | <b>TNN-<br/>NH<sub>3</sub></b>  | 590.2               | <b>GENSD<br/>S</b>                                                | 874.3               | <b>DGENS<br/>DSDA-<br/>NH<sub>3</sub></b>                         | 1202.4 | <b>DGENS<br/>DSDAT<br/>NN-H<sub>2</sub>O</b> | 1862.8 | <b>VDGEN<br/>SDSDA<br/>TNNAu<br/>LT-H<sub>2</sub>O</b> |
| 313.1 | <b>ENS-<br/>H<sub>2</sub>O</b>  | 598.2               | <b>a<sub>7</sub>-NH<sub>3</sub></b>                               | 874.4               | <b>TNNAu<br/>LT-NH<sub>3</sub></b>                                | 1202.4 | <b>b<sub>13</sub>-NH<sub>3</sub></b>         | 1862.8 | <b>a<sub>18</sub>-NH<sub>3</sub></b>                   |
| 314.1 | <b>ENS-<br/>NH<sub>3</sub></b>  | 600.2               | <b>DGENS<br/>D-H<sub>2</sub>O</b>                                 | 875.4               | <b>NNAuL<br/>TI-28</b>                                            | 1203.4 | <b>DGENS<br/>DSDAT<br/>NN-NH<sub>3</sub></b> | 1863.7 | <b>VDGEN<br/>SDSDA<br/>TNNAu<br/>LT-NH<sub>3</sub></b> |
| 315.2 | <b>a<sub>4</sub></b>            | 601.2               | <b>DGENS<br/>D-NH<sub>3</sub></b>                                 | 876.3               | <b>SDSDA<br/>TNNA</b>                                             | 1203.6 | <b>y<sub>10</sub>-H<sub>2</sub>O</b>         | 1866.8 | <b>DGENS<br/>DSDAT<br/>NNAuL<br/>TI-28</b>             |
| 317.1 | <b>NSD</b>                      | 602.2               | <b>VDGEN<br/>S</b>                                                | 877.3               | <b>GENSD<br/>SDAT</b>                                             | 1204.6 | <b>y<sub>10</sub>-NH<sub>3</sub></b>         | 1868.8 | <b>y<sub>16</sub></b>                                  |
| 318.1 | <b>DSD</b>                      | 602.3 <sup>+2</sup> | <b>y<sub>10</sub><sup>-</sup><br/>H<sub>2</sub>O<sup>+2</sup></b> | 885.4               | <b>NNAuL<br/>TI-H<sub>2</sub>O</b>                                | 1205.5 | <b>VDGEN<br/>SDSDA<br/>TN</b>                | 1876.8 | <b>DGENS<br/>DSDAT<br/>NNAuL<br/>TI-H<sub>2</sub>O</b> |
| 320.1 | <b>Au-28</b>                    | 602.8 <sup>+2</sup> | <b>y<sub>10</sub><sup>-</sup><br/>NH<sub>3</sub><sup>+2</sup></b> | 886.4               | <b>NNAuL<br/>TI-NH<sub>3</sub></b>                                | 1219.5 | <b>b<sub>13</sub></b>                        | 1877.8 | <b>DGENS<br/>DSDAT<br/>NNAuL<br/>TI-NH<sub>3</sub></b> |

|       |                                     |                     |                                     |       |                                            |        |                                                    |        |                                                              |
|-------|-------------------------------------|---------------------|-------------------------------------|-------|--------------------------------------------|--------|----------------------------------------------------|--------|--------------------------------------------------------------|
| 325.2 | <b>b<sub>4</sub>-H<sub>2</sub>O</b> | 603.2               | <b>SDATN<br/>N</b>                  | 887.3 | <b>a<sub>10</sub>-NH<sub>3</sub></b>       | 1220.4 | <b>DGENS<br/>DSDAT<br/>NN</b>                      | 1879.8 | <b>a<sub>18</sub></b>                                        |
| 328.2 | <b>LTI</b>                          | 604.2               | <b>DSDAT<br/>N</b>                  | 891.3 | <b>DGENS<br/>DSDA</b>                      | 1221.6 | <b>y<sub>10</sub></b>                              | 1880.8 | <b>VDGEN<br/>SDSDA<br/>TNNAu<br/>LT</b>                      |
| 329.1 | <b>GVDG</b>                         | 604.3               | <b>uLTI</b>                         | 891.3 | <b>VDGEN<br/>SDSD-<br/>28</b>              | 1234.5 | <b>GVDGE<br/>NSDSD<br/>ATN-28</b>                  | 1889.8 | <b>b<sub>18</sub>-H<sub>2</sub>O</b>                         |
| 330.1 | <b>TNN</b>                          | 611.3 <sup>+2</sup> | <b>y<sub>10</sub><sup>+2</sup></b>  | 891.3 | <b>NSDSD<br/>ATNN-<br/>28</b>              | 1237.5 | <b>SDSDA<br/>TNNAu<br/>L-28</b>                    | 1890.7 | <b>b<sub>18</sub>-NH<sub>3</sub></b>                         |
| 331.1 | <b>ENS</b>                          | 615.3               | <b>a<sub>7</sub></b>                | 891.4 | <b>TNNAu<br/>LT</b>                        | 1238.5 | <b>NSDSD<br/>ATNNA<br/>u-28</b>                    | 1894.8 | <b>DGENS<br/>DSDAT<br/>NNAuL<br/>TI</b>                      |
| 343.2 | <b>b<sub>4</sub></b>                | 618.2               | <b>DGENS<br/>D</b>                  | 901.3 | <b>VDGEN<br/>SDSD-<br/>H<sub>2</sub>O</b>  | 1244.5 | <b>GVDGE<br/>NSDSD<br/>ATN-<br/>H<sub>2</sub>O</b> | 1907.8 | <b>b<sub>18</sub></b>                                        |
| 343.2 | <b>y<sub>3</sub>-H<sub>2</sub>O</b> | 620.2               | <b>ENSDDS<br/>D-28</b>              | 901.3 | <b>NSDSD<br/>ATNN-<br/>H<sub>2</sub>O</b>  | 1245.5 | <b>GVDGE<br/>NSDSD<br/>ATN-<br/>NH<sub>3</sub></b> | 1907.8 | <b>y<sub>17</sub>-H<sub>2</sub>O</b>                         |
| 344.2 | <b>y<sub>3</sub>-NH<sub>3</sub></b> | 625.3               | <b>b<sub>7</sub>-H<sub>2</sub>O</b> | 902.3 | <b>VDGEN<br/>SDSD-<br/>NH<sub>3</sub></b>  | 1247.5 | <b>SDSDA<br/>TNNAu<br/>L-H<sub>2</sub>O</b>        | 1908.8 | <b>y<sub>17</sub>-NH<sub>3</sub></b>                         |
| 347.2 | <b>SDAT-<br/>28</b>                 | 626.2               | <b>b<sub>7</sub>-NH<sub>3</sub></b> | 902.3 | <b>NSDSD<br/>ATNN-<br/>NH<sub>3</sub></b>  | 1248.5 | <b>NSDSD<br/>ATNNA<br/>u-H<sub>2</sub>O</b>        | 1909.8 | <b>GVDGE<br/>NSDSD<br/>ATNNA<br/>uLT-28</b>                  |
| 348.1 | <b>Au</b>                           | 630.2               | <b>ENSDDS<br/>D-H<sub>2</sub>O</b>  | 903.4 | <b>NNAuL<br/>TI</b>                        | 1248.5 | <b>SDSDA<br/>TNNAu<br/>L-NH<sub>3</sub></b>        | 1919.8 | <b>GVDGE<br/>NSDSD<br/>ATNNA<br/>uLT-<br/>H<sub>2</sub>O</b> |
| 357.1 | <b>SDAT-<br/>H<sub>2</sub>O</b>     | 631.2               | <b>ENSDDS<br/>D-NH<sub>3</sub></b>  | 904.4 | <b>a<sub>10</sub></b>                      | 1249.4 | <b>NSDSD<br/>ATNNA<br/>u-NH<sub>3</sub></b>        | 1920.8 | <b>GVDGE<br/>NSDSD<br/>ATNNA<br/>uLT-<br/>NH<sub>3</sub></b> |
| 360.2 | <b>GENS-<br/>28</b>                 | 631.3               | <b>GVDGE<br/>NS-28</b>              | 906.3 | <b>ENSDDS<br/>DATN-<br/>28</b>             | 1249.6 | <b>SDATN<br/>NAuLTI-<br/>28</b>                    | 1925.9 | <b>y<sub>17</sub></b>                                        |
| 361.1 | <b>DSDA-<br/>28</b>                 | 641.3               | <b>GVDGE<br/>NS-H<sub>2</sub>O</b>  | 914.3 | <b>b<sub>10</sub>-H<sub>2</sub>O</b>       | 1251.5 | <b>DSDAT<br/>NNAuL<br/>T-28</b>                    | 1937.8 | <b>GVDGE<br/>NSDSD<br/>ATNNA<br/>uLT</b>                     |
| 361.2 | <b>y<sub>3</sub></b>                | 642.2               | <b>GVDGE<br/>NS-NH<sub>3</sub></b>  | 915.3 | <b>b<sub>10</sub>-NH<sub>3</sub></b>       | 1259.6 | <b>SDATN<br/>NAuLTI-<br/>H<sub>2</sub>O</b>        | 1963.8 | <b>a<sub>19</sub>-NH<sub>3</sub></b>                         |
| 362.2 | <b>uL-28</b>                        | 643.3               | <b>b<sub>7</sub></b>                | 916.3 | <b>ENSDDS<br/>DATN-<br/>H<sub>2</sub>O</b> | 1260.6 | <b>SDATN<br/>NAuLTI-<br/>NH<sub>3</sub></b>        | 1965.9 | <b>VDGEN<br/>SDSDA<br/>TNNAu<br/>LTI-28</b>                  |



|                            |                                                |                     |                                                     |                            |                                                     |        |                                            |        |                                                      |
|----------------------------|------------------------------------------------|---------------------|-----------------------------------------------------|----------------------------|-----------------------------------------------------|--------|--------------------------------------------|--------|------------------------------------------------------|
| 366.710<br>5 <sup>+2</sup> | y <sub>5</sub> -H <sub>2</sub> O <sup>+2</sup> | 646.3               | SDATN<br>NA-28                                      | 917.3                      | ENSDS<br>DATN-<br>NH <sub>3</sub>                   | 1261.5 | DSDAT<br>NNAuL<br>T-H <sub>2</sub> O       | 1975.8 | VDGEN<br>SDSDA<br>TNNau<br>LTI-H <sub>2</sub> O      |
| 367.202<br>5 <sup>+2</sup> | y <sub>5</sub> -NH <sub>3</sub> <sup>+2</sup>  | 647.4               | AuLTI-<br>28                                        | 917.5                      | y <sub>7</sub> -H <sub>2</sub> O                    | 1262.5 | GVDGE<br>NSDSD<br>ATN                      | 1976.8 | VDGEN<br>SDSDA<br>TNNau<br>LTI-NH <sub>3</sub>       |
| 370.1                      | GENS-<br>H <sub>2</sub> O                      | 648.2               | ENSDS<br>D                                          | 918.5                      | y <sub>7</sub> -NH <sub>3</sub>                     | 1262.5 | DSDAT<br>NNAuL<br>T-NH <sub>3</sub>        | 1980.8 | a <sub>19</sub>                                      |
| 371.1                      | DSDA-<br>H <sub>2</sub> O                      | 648.3               | NAuLT-<br>28                                        | 919.3                      | VDGEN<br>SDSD                                       | 1263.5 | DGENS<br>DSDAT<br>NNA-28                   | 1990.8 | b <sub>19</sub> -H <sub>2</sub> O                    |
| 371.1                      | GENS-<br>NH <sub>3</sub>                       | 649.3               | TNNau-<br>28                                        | 919.3                      | NSDSD<br>ATNN                                       | 1265.5 | SDSDA<br>TNNau<br>L                        | 1991.8 | b <sub>19</sub> -NH <sub>3</sub>                     |
| 372.2                      | a <sub>5</sub>                                 | 656.3               | SDATN<br>NA-H <sub>2</sub> O                        | 922.4                      | SDATN<br>NAu-28                                     | 1266.5 | NSDSD<br>ATNNA<br>u                        | 1993.8 | VDGEN<br>SDSDA<br>TNNau<br>LTI                       |
| 373.2                      | VDGE-<br>28                                    | 657.2               | SDATN<br>NA-NH <sub>3</sub>                         | 925.916<br>1 <sup>+2</sup> | y <sub>16</sub> -<br>H <sub>2</sub> O <sup>+2</sup> | 1273.5 | DGENS<br>DSDAT<br>NNA-<br>H <sub>2</sub> O | 2008.8 | b <sub>19</sub>                                      |
| 373.2                      | ATNN-<br>28                                    | 657.3               | AuLTI-<br>H <sub>2</sub> O                          | 926.4 <sup>+2</sup>        | y <sub>16</sub> -<br>NH <sub>3</sub> <sup>+2</sup>  | 1274.4 | DGENS<br>DSDAT<br>NNA-<br>NH <sub>3</sub>  | 2022.9 | GVDGE<br>NSDSD<br>ATNNA<br>uLTI-28                   |
| 373.2                      | TNNA-<br>28                                    | 658.3               | NAuLT-<br>H <sub>2</sub> O                          | 932.4                      | SDATN<br>NAu-<br>H <sub>2</sub> O                   | 1277.6 | SDATN<br>NAuLTI                            | 2022.9 | y <sub>18</sub> -H <sub>2</sub> O                    |
| 374.2                      | DATN-<br>28                                    | 659.3               | TNNau-<br>H <sub>2</sub> O                          | 932.4                      | b <sub>10</sub>                                     | 1279.5 | DSDAT<br>NNAuL<br>T                        | 2023.9 | y <sub>18</sub> -NH <sub>3</sub>                     |
| 375.2                      | SDAT                                           | 659.3               | GVDGE<br>NS                                         | 933.3                      | SDATN<br>NAu-<br>NH <sub>3</sub>                    | 1288.5 | a <sub>14</sub> -NH <sub>3</sub>           | 2032.9 | GVDGE<br>NSDSD<br>ATNNA<br>uLTI-<br>H <sub>2</sub> O |
| 375.8 <sup>+2</sup>        | y <sub>5</sub> <sup>+2</sup>                   | 659.3               | NAuLT-<br>NH <sub>3</sub>                           | 934.3                      | ENSDS<br>DATN                                       | 1291.5 | DGENS<br>DSDAT<br>NNA                      | 2033.8 | GVDGE<br>NSDSD<br>ATNNA<br>uLTI-<br>NH <sub>3</sub>  |
| 376.1                      | NSDS-<br>28                                    | 659.8 <sup>+2</sup> | y <sub>11</sub> -<br>H <sub>2</sub> O <sup>+2</sup> | 934.4                      | ATNNA<br>uLT-28                                     | 1291.5 | VDGEN<br>SDSDA<br>TNN-28                   | 2040.9 | y <sub>18</sub>                                      |
| 377.1                      | SDSD-<br>28                                    | 660.2               | TNNau-<br>NH <sub>3</sub>                           | 934.9 <sup>+2</sup>        | y <sub>16</sub> <sup>+2</sup>                       | 1301.5 | VDGEN<br>SDSDA<br>TNN-<br>H <sub>2</sub> O | 2050.9 | GVDGE<br>NSDSD<br>ATNNA<br>uLTI                      |
| 382.2                      | b <sub>5</sub> -H <sub>2</sub> O               | 660.3 <sup>+2</sup> | y <sub>11</sub> -<br>NH <sub>3</sub> <sup>+2</sup>  | 935.5                      | y <sub>7</sub>                                      | 1302.5 | VDGEN<br>SDSDA<br>TNN-<br>NH <sub>3</sub>  | 2076.9 | a <sub>20</sub> -NH <sub>3</sub>                     |
| 383.2                      | VDGE-<br>H <sub>2</sub> O                      | 661.3               | NNAuL-<br>28                                        | 944.4                      | ATNNA<br>uLT-<br>H <sub>2</sub> O                   | 1305.5 | a <sub>14</sub>                            | 2093.9 | a <sub>20</sub>                                      |

|       |                            |                     |                                     |                     |                                                   |        |                                      |        |                                      |
|-------|----------------------------|---------------------|-------------------------------------|---------------------|---------------------------------------------------|--------|--------------------------------------|--------|--------------------------------------|
| 383.2 | <b>ATNN-H<sub>2</sub>O</b> | 663.3               | <b>NSDSD AT-28</b>                  | 945.4               | <b>ATNNA uLT-NH<sub>3</sub></b>                   | 1315.5 | <b>b<sub>14</sub>-H<sub>2</sub>O</b> | 2103.9 | <b>b<sub>20</sub>-H<sub>2</sub>O</b> |
| 383.2 | <b>TNNA-H<sub>2</sub>O</b> | 663.3               | <b>SDSDA TN-28</b>                  | 948.4               | <b>GVDGE NSDSD-28</b>                             | 1316.5 | <b>b<sub>14</sub>-NH<sub>3</sub></b> | 2104.9 | <b>b<sub>20</sub>-NH<sub>3</sub></b> |
| 384.2 | <b>DATN-H<sub>2</sub>O</b> | 668.8 <sup>+2</sup> | <b>y<sub>11</sub><sup>+2</sup></b>  | 948.4               | <b>DATNN AuL-28</b>                               | 1318.6 | <b>y<sub>11</sub>-H<sub>2</sub>O</b> | 2121.9 | <b>b<sub>20</sub></b>                |
| 384.2 | <b>ATNN-NH<sub>3</sub></b> | 672.3               | <b>NNAuL-NH<sub>3</sub></b>         | 950.4               | <b>SDATN NAu</b>                                  | 1319.5 | <b>VDGEN SDSDA TNN</b>               | 2121.9 | <b>y<sub>19</sub>-H<sub>2</sub>O</b> |
| 384.2 | <b>TNNA-NH<sub>3</sub></b> | 673.2               | <b>SDSDA TN-H<sub>2</sub>O</b>      | 954.4 <sup>+2</sup> | <b>y<sub>17</sub>-H<sub>2</sub>O<sup>+2</sup></b> | 1319.6 | <b>y<sub>11</sub>-NH<sub>3</sub></b> | 2122.9 | <b>y<sub>19</sub>-NH<sub>3</sub></b> |
| 385.1 | <b>DATN-NH<sub>3</sub></b> | 673.2               | <b>NSDSD AT-H<sub>2</sub>O</b>      | 954.9 <sup>+2</sup> | <b>y<sub>17</sub>-NH<sub>3</sub><sup>+2</sup></b> | 1333.5 | <b>b<sub>14</sub></b>                | 2140.0 | <b>y<sub>19</sub></b>                |
| 386.1 | <b>NSDS-H<sub>2</sub>O</b> | 674.2               | <b>NSDSD AT-NH<sub>3</sub></b>      | 958.3               | <b>GVDGE NSDSD-H<sub>2</sub>O</b>                 | 1336.7 | <b>y<sub>11</sub></b>                | 2179.0 | <b>y<sub>20</sub>-H<sub>2</sub>O</b> |
| 387.1 | <b>SDSD-H<sub>2</sub>O</b> | 674.2               | <b>SDSDA TN-NH<sub>3</sub></b>      | 958.4               | <b>DATNN AuL-H<sub>2</sub>O</b>                   | 1338.6 | <b>SDSDA TNNAu LT-28</b>             | 2179.9 | <b>y<sub>20</sub>-NH<sub>3</sub></b> |
| 387.1 | <b>NSDS-NH<sub>3</sub></b> | 674.3               | <b>SDATN NA</b>                     | 959.3               | <b>GVDGE NSDSD-NH<sub>3</sub></b>                 | 1348.5 | <b>GVDGE NSDSD ATNN-28</b>           | 2197.0 | <b>y<sub>20</sub></b>                |
| 388.1 | <b>DGEN-28</b>             | 675.4               | <b>AuLTI</b>                        | 959.4               | <b>DATNN AuL-NH<sub>3</sub></b>                   | 1348.5 | <b>SDSDA TNNAu LT-H<sub>2</sub>O</b> | 2250.0 | <b>MH-H<sub>2</sub>O</b>             |
| 388.1 | <b>GENS</b>                | 676.3               | <b>NAuLT</b>                        | 962.4               | <b>VDGEN SDSDA-28</b>                             | 1349.5 | <b>SDSDA TNNAu LT-NH<sub>3</sub></b> | 2251.0 | <b>MH-NH<sub>3</sub></b>             |
| 389.1 | <b>DSDA</b>                | 677.2               | <b>DGENS DS-28</b>                  | 962.4               | <b>NSDSD ATNNA-28</b>                             | 1351.6 | <b>NSDSD ATNNA uL-28</b>             | 2268.0 | <b>MH</b>                            |
| 390.2 | <b>uL</b>                  | 677.2               | <b>GENSD SD-28</b>                  | 962.4               | <b>ATNNA uLT</b>                                  | 1358.5 | <b>GVDGENSDSDATNN-H<sub>2</sub>O</b> |        |                                      |
| 398.1 | <b>DGEN-H<sub>2</sub>O</b> | 677.3               | <b>TNNAu</b>                        | 963.4               | <b>GENSD SDATN-28</b>                             | 1359.5 | <b>GVDGENSDSDATNN-NH<sub>3</sub></b> |        |                                      |
| 399.1 | <b>DGEN-NH<sub>3</sub></b> | 685.3               | <b>a<sub>8</sub>-NH<sub>3</sub></b> | 963.4 <sup>+2</sup> | <b>y<sub>17</sub><sup>+2</sup></b>                | 1361.5 | <b>NSDSDATNNAuL-H<sub>2</sub>O</b>   |        |                                      |

# AGVDGENSDSDATNNANLTIK

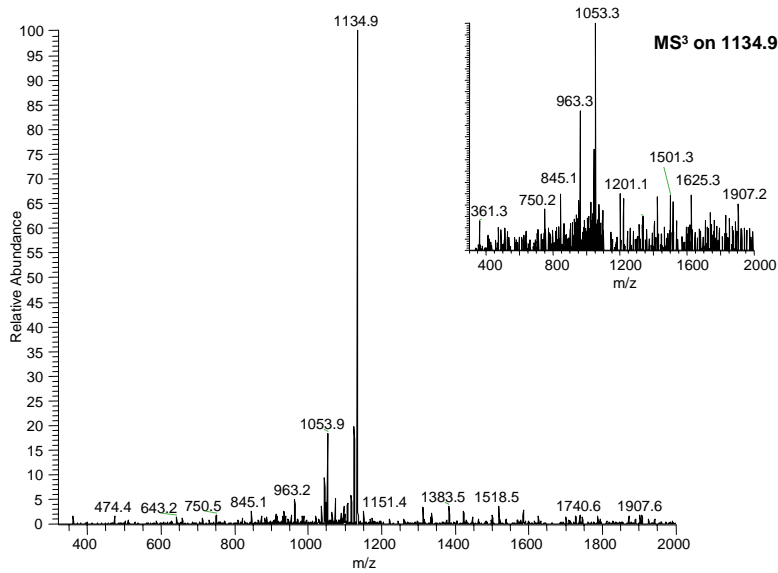

|                     |                                                  |                     |                                                  |                     |                                                              |                      |                                                              |        |                                         |
|---------------------|--------------------------------------------------|---------------------|--------------------------------------------------|---------------------|--------------------------------------------------------------|----------------------|--------------------------------------------------------------|--------|-----------------------------------------|
| 60.0                | <b>S</b>                                         | 416.1               | <b>DGEN</b>                                      | 721.3               | <b>NNAv-NH<sub>3</sub></b>                                   | 1035.4               | <b>TNNAvL T-H<sub>2</sub>O</b>                               | 1430.5 | <b>GVDGE NSDSD ATNNA-NH<sub>3</sub></b> |
| 65.6 <sup>+2</sup>  | <b>y<sub>1</sub>-NH<sub>3</sub><sup>+2</sup></b> | 418.2               | <b>ENSD-28</b>                                   | 724.3               | <b>AvLT</b>                                                  | 1035.5 <sup>+2</sup> | <b>y<sub>17</sub><sup>-</sup>H<sub>2</sub>O<sup>+2</sup></b> | 1430.5 | <b>b<sub>15</sub>-NH<sub>3</sub></b>    |
| 72.1                | <b>V</b>                                         | 428.1               | <b>ENSD-H<sub>2</sub>O</b>                       | 730.3               | <b>b<sub>8</sub></b>                                         | 1036.0 <sup>+2</sup> | <b>y<sub>17</sub><sup>-</sup>NH<sub>3</sub><sup>+2</sup></b> | 1439.6 | <b>SDATN NAvLTI</b>                     |
| 74.1                | <b>T</b>                                         | 429.1               | <b>ENSD-NH<sub>3</sub></b>                       | 737.3               | <b>NAvL</b>                                                  | 1036.4               | <b>TNNAvL T-NH<sub>3</sub></b>                               | 1441.6 | <b>DSDAT NNAvLT</b>                     |
| 74.1 <sup>+2</sup>  | <b>y<sub>1</sub><sup>+2</sup></b>                | 430.2               | <b>GVDGE-28</b>                                  | 738.3               | <b>NNAv</b>                                                  | 1037.5               | <b>NNAvLT I-28</b>                                           | 1447.6 | <b>GVDGE NSDSD ATNNA</b>                |
| 84.1                | <b>K</b>                                         | 440.2               | <b>GVDGE-H<sub>2</sub>O</b>                      | 738.4               | <b>vLTI-28</b>                                               | 1044.5 <sup>+2</sup> | <b>y<sub>17</sub><sup>+2</sup></b>                           | 1447.6 | <b>b<sub>15</sub></b>                   |
| 86.1                | <b>L</b>                                         | 444.2               | <b>ATNNA-28</b>                                  | 740.9 <sup>+2</sup> | <b>y<sub>11</sub><sup>-</sup>H<sub>2</sub>O<sup>+2</sup></b> | 1047.4               | <b>GVDGE NSDSD A</b>                                         | 1473.6 | <b>a<sub>16</sub>-NH<sub>3</sub></b>    |
| 86.1                | <b>I</b>                                         | 446.2               | <b>ENSD</b>                                      | 741.4 <sup>+2</sup> | <b>y<sub>11</sub><sup>-</sup>NH<sub>3</sub><sup>+2</sup></b> | 1047.4               | <b>b<sub>11</sub></b>                                        | 1480.7 | <b>y<sub>11</sub>-H<sub>2</sub>O</b>    |
| 87.1                | <b>N</b>                                         | 447.7 <sup>+2</sup> | <b>y<sub>5</sub>-H<sub>2</sub>O<sup>+2</sup></b> | 746.3               | <b>GVDGE NSD-28</b>                                          | 1047.5               | <b>NNAvLT I-H<sub>2</sub>O</b>                               | 1481.7 | <b>y<sub>11</sub>-NH<sub>3</sub></b>    |
| 88.0                | <b>D</b>                                         | 448.2               | <b>SDSDA-28</b>                                  | 748.3               | <b>GENSD SDA-28</b>                                          | 1048.4               | <b>ENSDDS DATNN</b>                                          | 1490.6 | <b>a<sub>16</sub></b>                   |
| 101.1               | <b>a<sub>2</sub></b>                             | 448.2 <sup>+2</sup> | <b>y<sub>5</sub>-NH<sub>3</sub><sup>+2</sup></b> | 748.4               | <b>vLTI-H<sub>2</sub>O</b>                                   | 1048.5               | <b>NNAvLT I-NH<sub>3</sub></b>                               | 1498.7 | <b>y<sub>11</sub></b>                   |
| 101.1               | <b>K</b>                                         | 454.2               | <b>ATNNA-H<sub>2</sub>O</b>                      | 749.9 <sup>+2</sup> | <b>y<sub>11</sub><sup>+2</sup></b>                           | 1053.5               | <b>TNNAvL T</b>                                              | 1500.6 | <b>b<sub>16</sub>-H<sub>2</sub>O</b>    |
| 102.1               | <b>E</b>                                         | 455.2               | <b>ATNNA-NH<sub>3</sub></b>                      | 756.3               | <b>GVDGE NSD-H<sub>2</sub>O</b>                              | 1063.4               | <b>VDGEN SDSDA T-28</b>                                      | 1500.6 | <b>SDSDA TNNAvL T-28</b>                |
| 122.1 <sup>+2</sup> | <b>y<sub>2</sub>-NH<sub>3</sub><sup>+2</sup></b> | 456.3               | <b>y<sub>4</sub>-H<sub>2</sub>O</b>              | 757.3               | <b>GVDGE NSD-NH<sub>3</sub></b>                              | 1065.5               | <b>NNAvLT I</b>                                              | 1501.6 | <b>b<sub>16</sub>-NH<sub>3</sub></b>    |

|                     |                               |                     |                               |                     |                                  |                      |                                      |        |                                       |
|---------------------|-------------------------------|---------------------|-------------------------------|---------------------|----------------------------------|----------------------|--------------------------------------|--------|---------------------------------------|
| 126.1               | <b>K</b>                      | 456.7 <sup>+2</sup> | $y_5^{+2}$                    | 758.3               | <b>GENSD SDA-H<sub>2</sub>O</b>  | 1073.4               | <b>VDGEN SDSDA T-H<sub>2</sub>O</b>  | 1510.6 | <b>SDSDA TNNAvL T-H<sub>2</sub>O</b>  |
| 129.1               | <b>b<sub>2</sub></b>          | 457.3               | $y_4\text{-NH}_3$             | 759.2               | <b>GENSD SDA-NH<sub>3</sub></b>  | 1073.4               | <b>a<sub>12</sub>-NH<sub>3</sub></b> | 1511.6 | <b>SDSDA TNNAvL T-NH<sub>3</sub></b>  |
| 129.1               | <b>GV-28</b>                  | 458.2               | <b>SDSDA-H<sub>2</sub>O</b>   | 761.3               | <b>DSDAT NNA-28</b>              | 1074.4               | <b>VDGEN SDSDA T-NH<sub>3</sub></b>  | 1513.6 | <b>NSDSD ATNNA vL-28</b>              |
| 129.1               | <b>K</b>                      | 458.2               | <b>GVDGE</b>                  | 766.4               | <b>vLTI</b>                      | 1077.4               | <b>GENSD SDATN N-28</b>              | 1518.6 | <b>b<sub>16</sub></b>                 |
| 130.1               | $y_1\text{-NH}_3$             | 461.2               | <b>SDATN-28</b>               | 771.3               | <b>DSDAT NNA-H<sub>2</sub>O</b>  | 1078.4               | <b>DGENS DSDAT N-28</b>              | 1523.6 | <b>NSDSD ATNNA vL-H<sub>2</sub>O</b>  |
| 130.6 <sup>+2</sup> | $y_2^{+2}$                    | 462.2               | <b>DSDAT-28</b>               | 772.3               | <b>DSDAT NNA-NH<sub>3</sub></b>  | 1079.5               | <b>y<sub>7</sub>-H<sub>2</sub>O</b>  | 1524.6 | <b>NSDSD ATNNA vL-NH<sub>3</sub></b>  |
| 145.1               | <b>DG-28</b>                  | 471.2               | <b>SDATN-H<sub>2</sub>O</b>   | 774.3               | <b>GVDGE NSD</b>                 | 1080.5               | <b>y<sub>7</sub>-NH<sub>3</sub></b>  | 1526.7 | <b>DSDAT NNAvLT I-28</b>              |
| 145.1               | <b>AT-28</b>                  | 472.2               | <b>DSDAT-H<sub>2</sub>O</b>   | 776.3               | <b>GENSD SDA</b>                 | 1084.4               | <b>SDATN NAV-28</b>                  | 1528.6 | <b>SDSDA TNNAvL T</b>                 |
| 147.1               | $y_1$                         | 472.2               | <b>SDATN-NH<sub>3</sub></b>   | 776.3               | <b>VDGEN SDS-28</b>              | 1087.4               | <b>GENSD SDATN N-H<sub>2</sub>O</b>  | 1529.6 | <b>ENSDDS DATNN Av-28</b>             |
| 155.0               | <b>DG-H<sub>2</sub>O</b>      | 472.2               | <b>ATNNA</b>                  | 777.3               | <b>SDSDA TNN-28</b>              | 1088.4               | <b>GENSD SDATN N-NH<sub>3</sub></b>  | 1536.7 | <b>DSDAT NNAvLT I-H<sub>2</sub>O</b>  |
| 155.1               | <b>AT-H<sub>2</sub>O</b>      | 474.3               | $y_4$                         | 777.3               | <b>NSDSD ATN-28</b>              | 1088.4               | <b>DGENS DSDAT N-H<sub>2</sub>O</b>  | 1537.6 | <b>DSDAT NNAvLT I-NH<sub>3</sub></b>  |
| 157.1               | <b>GV</b>                     | 475.2               | <b>GENSD-28</b>               | 784.4 <sup>+2</sup> | $y_{12}\text{-H}_2\text{O}^{+2}$ | 1089.4               | <b>DGENS DSDAT N-NH<sub>3</sub></b>  | 1539.6 | <b>ENSDDS DATNN Av-H<sub>2</sub>O</b> |
| 158.1               | <b>NA-28</b>                  | 475.2               | <b>DGENS-28</b>               | 784.9 <sup>+2</sup> | $y_{12}\text{-NH}_3^{+2}$        | 1090.4               | <b>a<sub>12</sub></b>                | 1540.5 | <b>ENSDDS DATNN Av-NH<sub>3</sub></b> |
| 159.1               | <b>DA-28</b>                  | 476.2               | <b>SDSDA</b>                  | 786.3               | <b>VDGEN SDS-H<sub>2</sub>O</b>  | 1091.4               | <b>VDGEN SDSDA T</b>                 | 1541.6 | <b>NSDSD ATNNA vL</b>                 |
| 159.1               | <b>GE-28</b>                  | 482.2               | <b>Av-28</b>                  | 787.3               | <b>VDGEN SDS-NH<sub>3</sub></b>  | 1091.4               | <b>ENSDDS DATNN A-28</b>             | 1554.7 | <b>DSDAT NNAvLT I</b>                 |
| 169.1               | <b>DA-H<sub>2</sub>O</b>      | 483.3 <sup>+2</sup> | $y_6\text{-H}_2\text{O}^{+2}$ | 787.3               | <b>SDSDA TNN-H<sub>2</sub>O</b>  | 1093.0 <sup>+2</sup> | $y_{18}\text{-H}_2\text{O}^{+2}$     | 1557.6 | <b>ENSDDS DATNN Av</b>                |
| 169.1               | <b>NA-NH<sub>3</sub></b>      | 483.8 <sup>+2</sup> | $y_6\text{-NH}_3^{+2}$        | 787.3               | <b>NSDSD ATN-H<sub>2</sub>O</b>  | 1093.5 <sup>+2</sup> | $y_{18}\text{-NH}_3^{+2}$            | 1567.7 | $y_{12}\text{-H}_2\text{O}$           |
| 169.1               | <b>GE-H<sub>2</sub>O</b>      | 485.2               | <b>DGENS-H<sub>2</sub>O</b>   | 788.3               | <b>SDSDA TNN-NH<sub>3</sub></b>  | 1094.4               | <b>SDATN NAV-H<sub>2</sub>O</b>      | 1568.7 | $y_{12}\text{-NH}_3$                  |
| 172.1 <sup>+2</sup> | $y_3\text{-H}_2\text{O}^{+2}$ | 485.2               | <b>GENSD-H<sub>2</sub>O</b>   | 788.3               | <b>NSDSD ATN-</b>                | 1095.4               | <b>SDATN NAV-</b>                    | 1585.7 | $y_{12}$                              |

|                     |                                                  |                     |                                   |                     |                                     |                      |                                      |        |                                        |
|---------------------|--------------------------------------------------|---------------------|-----------------------------------|---------------------|-------------------------------------|----------------------|--------------------------------------|--------|----------------------------------------|
|                     |                                                  |                     |                                   |                     | <b>NH<sub>3</sub></b>               |                      | <b>NH<sub>3</sub></b>                |        |                                        |
| 172.6 <sup>+2</sup> | <b>y<sub>3</sub>-NH<sub>3</sub><sup>+2</sup></b> | 486.1               | <b>GENSD-NH<sub>3</sub></b>       | 789.3               | <b>DSDAT NNA</b>                    | 1096.5               | <b>ATNNA vLT-28</b>                  | 1586.6 | <b>GENSD DATN Nav-28</b>               |
| 173.1               | <b>DG</b>                                        | 486.1               | <b>DGENS-NH<sub>3</sub></b>       | 792.3               | <b>DGENS DSD-28</b>                 | 1097.6               | <b>y<sub>7</sub></b>                 | 1596.6 | <b>GENSD DATN Nav-H<sub>2</sub>O</b>   |
| 173.1               | <b>AT</b>                                        | 487.2               | <b>VDGEN-28</b>                   | 792.3               | <b>ENSDDS DAT-28</b>                | 1100.4               | <b>b<sub>12</sub>-H<sub>2</sub>O</b> | 1597.6 | <b>GENSD DATN Nav-NH<sub>3</sub></b>   |
| 174.1               | <b>NS-28</b>                                     | 488.2               | <b>DATNN-28</b>                   | 793.4 <sup>+2</sup> | <b>y<sub>12</sub><sup>+2</sup></b>  | 1101.4               | <b>b<sub>12</sub>-NH<sub>3</sub></b> | 1613.7 | <b>SDSDA TNNAvL TI-28</b>              |
| 175.1               | <b>DS-28</b>                                     | 489.2               | <b>SDATN</b>                      | 800.3               | <b>a<sub>9</sub>-NH<sub>3</sub></b> | 1101.4               | <b>ENSDDS DATNN A-H<sub>2</sub>O</b> | 1614.6 | <b>GENSD DATN Nav</b>                  |
| 175.1               | <b>SD-28</b>                                     | 490.2               | <b>DSDAT</b>                      | 802.2               | <b>DGENS DSD-H<sub>2</sub>O</b>     | 1102.0 <sup>+2</sup> | <b>y<sub>18</sub><sup>+2</sup></b>   | 1614.7 | <b>NSDSD ATNNA vLT-28</b>              |
| 181.1 <sup>+2</sup> | <b>y<sub>3</sub><sup>+2</sup></b>                | 491.2               | <b>NSDSD-28</b>                   | 802.3               | <b>ENSDDS DAT-H<sub>2</sub>O</b>    | 1102.4               | <b>ENSDDS DATNN A-NH<sub>3</sub></b> | 1623.7 | <b>SDSDA TNNAvL TI-H<sub>2</sub>O</b>  |
| 184.1               | <b>NS-H<sub>2</sub>O</b>                         | 492.3 <sup>+2</sup> | <b>y<sub>6</sub><sup>+2</sup></b> | 803.2               | <b>DGENS DSD-NH<sub>3</sub></b>     | 1105.4               | <b>GENSD DATN N</b>                  | 1624.6 | <b>NSDSD ATNNA vLT-H<sub>2</sub>O</b>  |
| 185.1               | <b>DS-H<sub>2</sub>O</b>                         | 497.2               | <b>VDGEN-H<sub>2</sub>O</b>       | 803.3               | <b>ENSDDS DAT-NH<sub>3</sub></b>    | 1106.4               | <b>DGENS DSDAT N</b>                 | 1624.7 | <b>SDSDA TNNAvL TI-NH<sub>3</sub></b>  |
| 185.1               | <b>SD-H<sub>2</sub>O</b>                         | 498.2               | <b>VDGEN-NH<sub>3</sub></b>       | 804.3               | <b>VDGEN SDS</b>                    | 1106.5               | <b>ATNNA vLT-H<sub>2</sub>O</b>      | 1625.6 | <b>NSDSD ATNNA vLT-NH<sub>3</sub></b>  |
| 185.1               | <b>NS-NH<sub>3</sub></b>                         | 498.2               | <b>DATNN-H<sub>2</sub>O</b>       | 805.3               | <b>NSDSD ATN</b>                    | 1107.5               | <b>ATNNA vLT-NH<sub>3</sub></b>      | 1641.7 | <b>SDSDA TNNAvL TI</b>                 |
| 186.1               | <b>NA</b>                                        | 499.2               | <b>DATNN-NH<sub>3</sub></b>       | 805.3               | <b>SDSDA TNN</b>                    | 1110.5               | <b>DATNN AvL-28</b>                  | 1642.7 | <b>NSDSD ATNNA vLT</b>                 |
| 187.1               | <b>DA</b>                                        | 501.2               | <b>NSDSD-H<sub>2</sub>O</b>       | 809.4               | <b>AvLTI-28</b>                     | 1112.4               | <b>SDATN Nav</b>                     | 1642.7 | <b>ENSDDS DATNN AvL-28</b>             |
| 187.1               | <b>GE</b>                                        | 501.2               | <b>a<sub>6</sub></b>              | 810.4               | <b>NAvLT-28</b>                     | 1118.4               | <b>b<sub>12</sub></b>                | 1652.6 | <b>ENSDDS DATNN AvL-H<sub>2</sub>O</b> |
| 187.1               | <b>VD-28</b>                                     | 502.1               | <b>NSDSD-NH<sub>3</sub></b>       | 811.3               | <b>TNNAv-28</b>                     | 1119.4               | <b>ENSDDS DATNN A</b>                | 1653.6 | <b>ENSDDS DATNN AvL-NH<sub>3</sub></b> |
| 187.1               | <b>TI-28</b>                                     | 503.2               | <b>DGENS</b>                      | 817.3               | <b>a<sub>9</sub></b>                | 1120.4               | <b>GVDGE NSDSD AT-28</b>             | 1670.7 | <b>ENSDDS DATNN AvL</b>                |
| 187.1               | <b>LT-28</b>                                     | 503.2               | <b>GENSD</b>                      | 819.4               | <b>AvLTI-H<sub>2</sub>O</b>         | 1120.5               | <b>DATNN AvL-</b>                    | 1682.8 | <b>y<sub>13</sub>-H<sub>2</sub>O</b>   |

|       |                          |                     |                                                  |                            |                                                   |                      |                                                              |        |                                        |
|-------|--------------------------|---------------------|--------------------------------------------------|----------------------------|---------------------------------------------------|----------------------|--------------------------------------------------------------|--------|----------------------------------------|
|       |                          |                     |                                                  |                            |                                                   |                      | H <sub>2</sub> O                                             |        |                                        |
| 188.1 | <b>TN-28</b>             | 505.2               | <b>ENSDS-28</b>                                  | 820.3                      | <b>DGENS DSD</b>                                  | 1121.4               | <b>DATNN AvL-NH<sub>3</sub></b>                              | 1683.7 | <b>y<sub>13</sub>-NH<sub>3</sub></b>   |
| 197.1 | <b>VD-H<sub>2</sub>O</b> | 510.2               | <b>Av</b>                                        | 820.3                      | <b>ENSDS DAT</b>                                  | 1124.5               | <b>ATNNA vLT</b>                                             | 1699.7 | <b>GENSD SDATN NAvL-28</b>             |
| 197.1 | <b>TI-H<sub>2</sub>O</b> | 511.2               | <b>b<sub>6</sub>-H<sub>2</sub>O</b>              | 820.4                      | <b>NAvLT-H<sub>2</sub>O</b>                       | 1130.4               | <b>GVDGE NSDSD AT-H<sub>2</sub>O</b>                         | 1700.8 | <b>y<sub>13</sub></b>                  |
| 197.1 | <b>LT-H<sub>2</sub>O</b> | 515.2               | <b>ENSDS-H<sub>2</sub>O</b>                      | 821.3                      | <b>TNNAv-H<sub>2</sub>O</b>                       | 1131.4               | <b>GVDGE NSDSD AT-NH<sub>3</sub></b>                         | 1701.6 | <b>DGENS DSDAT NNAv-28</b>             |
| 198.1 | <b>TN-H<sub>2</sub>O</b> | 515.2               | <b>VDGEN</b>                                     | 821.3                      | <b>NAvLT-NH<sub>3</sub></b>                       | 1138.5               | <b>DATNN AvL</b>                                             | 1709.7 | <b>GENSD SDATN NAvL-H<sub>2</sub>O</b> |
| 199.1 | <b>TN-NH<sub>3</sub></b> | 516.2               | <b>ENSDS-NH<sub>3</sub></b>                      | 822.3                      | <b>TNNAv-NH<sub>3</sub></b>                       | 1138.5               | <b>TNNAvL TI-28</b>                                          | 1710.6 | <b>GENSD SDATN NAvL-NH<sub>3</sub></b> |
| 200.1 | <b>a<sub>3</sub></b>     | 516.2               | <b>DATNN</b>                                     | 823.4                      | <b>NNAvL-28</b>                                   | 1142.5 <sup>+2</sup> | <b>y<sub>19</sub><sup>-</sup>H<sub>2</sub>O<sup>+2</sup></b> | 1711.6 | <b>DGENS DSDAT NNAv-H<sub>2</sub>O</b> |
| 201.1 | <b>NN-28</b>             | 519.2               | <b>NSDSD</b>                                     | 827.3                      | <b>b<sub>9</sub>-H<sub>2</sub>O</b>               | 1143.0 <sup>+2</sup> | <b>y<sub>19</sub><sup>-</sup>NH<sub>3</sub><sup>+2</sup></b> | 1712.6 | <b>DGENS DSDAT NNAv-NH<sub>3</sub></b> |
| 202.1 | <b>NS</b>                | 524.2               | <b>vL-28</b>                                     | 828.3                      | <b>b<sub>9</sub>-NH<sub>3</sub></b>               | 1148.4               | <b>GVDGE NSDSD AT</b>                                        | 1727.7 | <b>GENSD SDATN NAvL</b>                |
| 203.1 | <b>SD</b>                | 529.2               | <b>b<sub>6</sub></b>                             | 833.3                      | <b>GVDGE NSDSD-28</b>                             | 1148.4               | <b>GENSD SDATN NA-28</b>                                     | 1727.7 | <b>NSDSD ATNNA vLTI-28</b>             |
| 203.1 | <b>DS</b>                | 533.2               | <b>ENSDS</b>                                     | 834.3                      | <b>NNAvL-NH<sub>3</sub></b>                       | 1148.5               | <b>TNNAvL TI-H<sub>2</sub>O</b>                              | 1729.6 | <b>DGENS DSDAT NNAv</b>                |
| 212.1 | <b>NN-NH<sub>3</sub></b> | 540.3 <sup>+2</sup> | <b>y<sub>7</sub>-H<sub>2</sub>O<sup>+2</sup></b> | 837.4                      | <b>AvLTI</b>                                      | 1149.5               | <b>TNNAvL TI-NH<sub>3</sub></b>                              | 1737.7 | <b>NSDSD ATNNA vLTI-H<sub>2</sub>O</b> |
| 215.1 | <b>VD</b>                | 540.8 <sup>+2</sup> | <b>y<sub>7</sub>-NH<sub>3</sub><sup>+2</sup></b> | 838.4                      | <b>NAvLT</b>                                      | 1151.5 <sup>+2</sup> | <b>y<sub>19</sub><sup>+2</sup></b>                           | 1738.7 | <b>NSDSD ATNNA vLTI-NH<sub>3</sub></b> |
| 215.1 | <b>TI</b>                | 544.2               | <b>GVDGE N-28</b>                                | 839.3                      | <b>TNNAv</b>                                      | 1158.4               | <b>GENSD SDATN NA-H<sub>2</sub>O</b>                         | 1743.7 | <b>ENSDS DATNN AvLT-28</b>             |
| 215.1 | <b>LT</b>                | 549.2               | <b>SDSDA T-28</b>                                | 841.883<br>8 <sup>+2</sup> | <b>y<sub>13</sub>-H<sub>2</sub>O<sup>+2</sup></b> | 1159.4               | <b>GENSD SDATN NA-NH<sub>3</sub></b>                         | 1753.7 | <b>ENSDS DATNN AvLT-H<sub>2</sub>O</b> |
| 216.1 | <b>TN</b>                | 549.3 <sup>+2</sup> | <b>y<sub>7</sub><sup>+2</sup></b>                | 842.4 <sup>+2</sup>        | <b>y<sub>13</sub>-NH<sub>3</sub><sup>+2</sup></b> | 1166.5               | <b>TNNAvL TI</b>                                             | 1754.7 | <b>ENSDS DATNN AvLT-</b>               |

|                     |                                                |       |                             |                     |                                    |                      |                                                                |        |                                              |
|---------------------|------------------------------------------------|-------|-----------------------------|---------------------|------------------------------------|----------------------|----------------------------------------------------------------|--------|----------------------------------------------|
|                     |                                                |       |                             |                     |                                    |                      |                                                                |        | NH <sub>3</sub>                              |
| 216.1               | EN-28                                          | 552.2 | vL                          | 843.3               | GVDGE<br>NSDS-<br>H <sub>2</sub> O | 1171.0 <sup>+2</sup> | y <sub>20</sub> <sup>-</sup><br>H <sub>2</sub> O <sup>+2</sup> | 1755.7 | NSDSD<br>ATNNA<br>vLTI                       |
| 226.1               | EN-H <sub>2</sub> O                            | 554.2 | GVDGE<br>N-H <sub>2</sub> O | 844.3               | GVDGE<br>NSDS-<br>NH <sub>3</sub>  | 1171.5 <sup>+2</sup> | y <sub>20</sub> <sup>-</sup><br>NH <sub>3</sub> <sup>+2</sup>  | 1769.8 | y <sub>14</sub> -H <sub>2</sub> O            |
| 227.1               | EN-NH <sub>3</sub>                             | 555.2 | GVDGE<br>N-NH <sub>3</sub>  | 845.3               | b <sub>9</sub>                     | 1174.4               | a <sub>13</sub> -NH <sub>3</sub>                               | 1770.8 | y <sub>14</sub> -NH <sub>3</sub>             |
| 228.1               | b <sub>3</sub>                                 | 559.2 | SDSDA<br>T-H <sub>2</sub> O | 848.3               | SDSDA<br>TNNA-<br>28               | 1176.4               | GENSD<br>SDATN<br>NA                                           | 1771.7 | ENSDS<br>DATNN<br>AvLT                       |
| 228.7 <sup>+2</sup> | y <sub>4</sub> -H <sub>2</sub> O <sup>+2</sup> | 559.2 | DATNN<br>A-28               | 849.3               | GENSD<br>SDAT-<br>28               | 1177.5               | VDGEN<br>SDSDA<br>TN-28                                        | 1787.8 | y <sub>14</sub>                              |
| 229.1               | NN                                             | 562.2 | NSDSD<br>A-28               | 850.9 <sup>+2</sup> | y <sub>13</sub> <sup>+2</sup>      | 1180.0 <sup>+2</sup> | y <sub>20</sub> <sup>+2</sup>                                  | 1800.7 | VDGEN<br>SDSDA<br>TNNAv-<br>28               |
| 229.2 <sup>+2</sup> | y <sub>4</sub> -NH <sub>3</sub> <sup>+2</sup>  | 562.2 | GENSD<br>S-28               | 851.4               | NNAvL                              | 1187.4               | VDGEN<br>SDSDA<br>TN-H <sub>2</sub> O                          | 1800.7 | GENSD<br>SDATN<br>NAvLT-<br>28               |
| 237.7 <sup>+2</sup> | y <sub>4</sub> <sup>+2</sup>                   | 569.2 | DATNN<br>A-H <sub>2</sub> O | 858.3               | SDSDA<br>TNNA-<br>H <sub>2</sub> O | 1188.4               | VDGEN<br>SDSDA<br>TN-NH <sub>3</sub>                           | 1810.7 | VDGEN<br>SDSDA<br>TNNAv-<br>H <sub>2</sub> O |
| 243.2               | y <sub>2</sub> -NH <sub>3</sub>                | 570.2 | DATNN<br>A-NH <sub>3</sub>  | 859.3               | GENSD<br>SDAT-<br>H <sub>2</sub> O | 1191.5               | a <sub>13</sub>                                                | 1810.7 | GENSD<br>SDATN<br>NAvLT-<br>H <sub>2</sub> O |
| 244.1               | EN                                             | 572.2 | NSDSD<br>A-H <sub>2</sub> O | 859.3               | SDSDA<br>TNNA-<br>NH <sub>3</sub>  | 1192.4               | DGENS<br>DSDAT<br>NN-28                                        | 1811.7 | VDGEN<br>SDSDA<br>TNNAv-<br>NH <sub>3</sub>  |
| 244.1               | GVD-28                                         | 572.2 | GENSD<br>S-H <sub>2</sub> O | 860.3               | GENSD<br>SDAT-<br>NH <sub>3</sub>  | 1193.6               | y <sub>8</sub> -H <sub>2</sub> O                               | 1811.7 | GENSD<br>SDATN<br>NAvLT-<br>NH <sub>3</sub>  |
| 244.1               | VDG-28                                         | 572.2 | GVDGE<br>N                  | 861.3               | GVDGE<br>NSDS                      | 1194.6               | y <sub>8</sub> -NH <sub>3</sub>                                | 1814.7 | DGENS<br>DSDAT<br>NNAvL-<br>28               |
| 246.1               | SDA-28                                         | 573.2 | NSDSD<br>A-NH <sub>3</sub>  | 863.3               | DGENS<br>DSDA-<br>28               | 1197.5               | SDATN<br>NAvL-<br>28                                           | 1824.7 | DGENS<br>DSDAT<br>NNAvL-<br>H <sub>2</sub> O |
| 254.1               | GVD-<br>H <sub>2</sub> O                       | 573.2 | GENSD<br>S-NH <sub>3</sub>  | 873.3               | DGENS<br>DSDA-<br>H <sub>2</sub> O | 1199.5               | DSDAT<br>NNAv-<br>28                                           | 1825.7 | DGENS<br>DSDAT<br>NNAvL-<br>NH <sub>3</sub>  |
| 254.1               | VDG-<br>H <sub>2</sub> O                       | 574.2 | VDGEN<br>S-28               | 874.3               | DGENS<br>DSDA-<br>NH <sub>3</sub>  | 1201.5               | b <sub>13</sub> -H <sub>2</sub> O                              | 1828.7 | VDGEN<br>SDSDA<br>TNNAv                      |
| 256.1               | SDA-<br>H <sub>2</sub> O                       | 575.2 | SDATN<br>N-28               | 876.3               | SDSDA<br>TNNA                      | 1202.4               | DGENS<br>DSDAT<br>NN-H <sub>2</sub> O                          | 1828.7 | GENSD<br>SDATN<br>NAvLT                      |

|       |                           |                     |                                                  |                     |                                                               |                      |                                       |        |                                           |
|-------|---------------------------|---------------------|--------------------------------------------------|---------------------|---------------------------------------------------------------|----------------------|---------------------------------------|--------|-------------------------------------------|
| 259.1 | <b>ATN-28</b>             | 576.2               | <b>DSDAT N-28</b>                                | 877.3               | <b>GENSD SDAT</b>                                             | 1202.4               | <b>b<sub>13</sub>-NH<sub>3</sub></b>  | 1842.7 | <b>DGENS DSDAT NNAvL</b>                  |
| 260.1 | <b>DAT-28</b>             | 577.2               | <b>SDSDA T</b>                                   | 882.4               | <b>ATNNA v-28</b>                                             | 1203.4               | <b>DGENS DSDAT NN-NH<sub>3</sub></b>  | 1856.8 | <b>ENSDDS DATNN AvLTI-28</b>              |
| 260.2 | <b>y<sub>2</sub></b>      | 584.2               | <b>VDGEN S-H<sub>2</sub>O</b>                    | 885.4 <sup>+2</sup> | <b>y<sub>14</sub><sup>-</sup>-H<sub>2</sub>O<sup>+2</sup></b> | 1205.5               | <b>VDGEN SDSDA TN</b>                 | 1857.7 | <b>GVDGE NSDSD ATNNA v-28</b>             |
| 262.1 | <b>SDS-28</b>             | 585.2               | <b>VDGEN S-NH<sub>3</sub></b>                    | 885.9 <sup>+2</sup> | <b>y<sub>14</sub><sup>-</sup>-NH<sub>3</sub><sup>+2</sup></b> | 1206.5 <sup>+2</sup> | <b>MH-H<sub>2</sub>O<sup>+2</sup></b> | 1866.8 | <b>ENSDDS DATNN AvLTI-H<sub>2</sub>O</b>  |
| 269.1 | <b>ATN-H<sub>2</sub>O</b> | 585.2               | <b>SDATN N-H<sub>2</sub>O</b>                    | 887.3               | <b>a<sub>10</sub>-NH<sub>3</sub></b>                          | 1207.0 <sup>+2</sup> | <b>MH-NH<sub>3</sub><sup>+2</sup></b> | 1867.7 | <b>GVDGE NSDSD ATNNA v-H<sub>2</sub>O</b> |
| 270.1 | <b>DAT-H<sub>2</sub>O</b> | 586.2               | <b>DSDAT N-H<sub>2</sub>O</b>                    | 891.3               | <b>DGENS DSDA</b>                                             | 1207.5               | <b>SDATN NAvL-H<sub>2</sub>O</b>      | 1867.8 | <b>ENSDDS DATNN AvLTI-NH<sub>3</sub></b>  |
| 270.1 | <b>ATN-NH<sub>3</sub></b> | 586.2               | <b>SDATN N-NH<sub>3</sub></b>                    | 891.3               | <b>VDGEN SDSD-28</b>                                          | 1208.5               | <b>SDATN NAvL-NH<sub>3</sub></b>      | 1868.7 | <b>GVDGE NSDSD ATNNA v-NH<sub>3</sub></b> |
| 272.1 | <b>SDS-H<sub>2</sub>O</b> | 587.2               | <b>DSDAT N-NH<sub>3</sub></b>                    | 891.3               | <b>NSDSD ATNN-28</b>                                          | 1209.4               | <b>DSDAT NNAv-H<sub>2</sub>O</b>      | 1883.8 | <b>y<sub>15</sub>-H<sub>2</sub>O</b>      |
| 272.1 | <b>GVD</b>                | 587.2               | <b>DATNN A</b>                                   | 892.4               | <b>ATNNA v-H<sub>2</sub>O</b>                                 | 1209.6               | <b>ATNNA vLTI-28</b>                  | 1884.8 | <b>ENSDDS DATNN AvLTI</b>                 |
| 272.1 | <b>VDG</b>                | 590.2               | <b>NSDSD A</b>                                   | 893.3               | <b>ATNNA v-NH<sub>3</sub></b>                                 | 1210.4               | <b>DSDAT NNAv-NH<sub>3</sub></b>      | 1884.8 | <b>y<sub>15</sub>-NH<sub>3</sub></b>      |
| 272.1 | <b>NNA-28</b>             | 590.2               | <b>DGENS D-28</b>                                | 894.4 <sup>+2</sup> | <b>y<sub>14</sub><sup>+2</sup></b>                            | 1211.5               | <b>DATNN AvLT-28</b>                  | 1885.7 | <b>GVDGE NSDSD ATNNA v</b>                |
| 273.1 | <b>GEN-28</b>             | 590.2               | <b>GENSD S</b>                                   | 894.5               | <b>y<sub>5</sub>-H<sub>2</sub>O</b>                           | 1211.6               | <b>y<sub>8</sub></b>                  | 1901.8 | <b>y<sub>15</sub></b>                     |
| 274.1 | <b>SDA</b>                | 595.3               | <b>AvL-28</b>                                    | 895.5               | <b>y<sub>5</sub>-NH<sub>3</sub></b>                           | 1215.5 <sup>+2</sup> | <b>MH<sup>+2</sup></b>                | 1911.7 | <b>a<sub>17</sub>-NH<sub>3</sub></b>      |
| 274.1 | <b>DGE-28</b>             | 596.2               | <b>NAv-28</b>                                    | 901.3               | <b>VDGEN SDSD-H<sub>2</sub>O</b>                              | 1219.5               | <b>b<sub>13</sub></b>                 | 1913.8 | <b>VDGEN SDSDA TNAvL-28</b>               |
| 283.1 | <b>NNA-NH<sub>3</sub></b> | 597.3 <sup>+2</sup> | <b>y<sub>8</sub>-H<sub>2</sub>O<sup>+2</sup></b> | 901.3               | <b>NSDSD ATNN-H<sub>2</sub>O</b>                              | 1219.6               | <b>ATNNA vLTI-H<sub>2</sub>O</b>      | 1913.8 | <b>GENSD SDATN NAvLTI-28</b>              |
| 283.1 | <b>GEN-H<sub>2</sub>O</b> | 597.8 <sup>+2</sup> | <b>y<sub>8</sub>-NH<sub>3</sub><sup>+2</sup></b> | 902.3               | <b>VDGEN SDSD-NH<sub>3</sub></b>                              | 1220.4               | <b>DGENS DSDAT NN</b>                 | 1915.8 | <b>DGENS DSDAT NNAvLT-28</b>              |
| 284.1 | <b>DGE-H<sub>2</sub>O</b> | 598.2               | <b>a<sub>7</sub>-NH<sub>3</sub></b>              | 902.3               | <b>NSDSD ATNN-NH<sub>3</sub></b>                              | 1220.6               | <b>ATNNA vLTI-NH<sub>3</sub></b>      | 1923.8 | <b>VDGEN SDSDA TNAvL-H<sub>2</sub>O</b>   |



|       |                           |                     |                                     |       |                                      |        |                                       |        |                                           |
|-------|---------------------------|---------------------|-------------------------------------|-------|--------------------------------------|--------|---------------------------------------|--------|-------------------------------------------|
| 284.1 | <b>GEN-NH<sub>3</sub></b> | 600.2               | <b>DGENS D-H<sub>2</sub>O</b>       | 904.4 | <b>a<sub>10</sub></b>                | 1221.5 | <b>DATNN AvLT-H<sub>2</sub>O</b>      | 1923.8 | <b>GENSD SDATN NAvLTI-H<sub>2</sub>O</b>  |
| 287.1 | <b>ATN</b>                | 601.2               | <b>DGENS D-NH<sub>3</sub></b>       | 906.3 | <b>ENSDS DATN-28</b>                 | 1222.5 | <b>DATNN AvLT-NH<sub>3</sub></b>      | 1924.7 | <b>VDGEN SDSDA TNNAvL-NH<sub>3</sub></b>  |
| 288.1 | <b>DAT</b>                | 602.2               | <b>VDGEN S</b>                      | 910.4 | <b>ATNNAv</b>                        | 1225.5 | <b>SDATN NAvL</b>                     | 1924.8 | <b>GENSD SDATN NAvLTI-NH<sub>3</sub></b>  |
| 289.1 | <b>NSD-28</b>             | 603.2               | <b>SDATN N</b>                      | 912.5 | <b>y<sub>5</sub></b>                 | 1227.4 | <b>DSDAT NNAv</b>                     | 1925.7 | <b>DGENS DSDAT NNAvLT-H<sub>2</sub>O</b>  |
| 290.1 | <b>SDS</b>                | 604.2               | <b>DSDAT N</b>                      | 914.3 | <b>b<sub>10</sub>-H<sub>2</sub>O</b> | 1234.5 | <b>GVDGE NSDSD ATN-28</b>             | 1926.7 | <b>DGENS DSDAT NNAvLT-NH<sub>3</sub></b>  |
| 290.1 | <b>DSD-28</b>             | 606.3 <sup>+2</sup> | <b>y<sub>8</sub><sup>+2</sup></b>   | 915.3 | <b>b<sub>10</sub>-NH<sub>3</sub></b> | 1237.6 | <b>ATNNAvLTI</b>                      | 1928.7 | <b>a<sub>17</sub></b>                     |
| 299.1 | <b>NSD-H<sub>2</sub>O</b> | 607.2               | <b>NAv-NH<sub>3</sub></b>           | 916.3 | <b>ENSDS DATN-H<sub>2</sub>O</b>     | 1239.5 | <b>DATNN AvLT</b>                     | 1938.7 | <b>b<sub>17</sub>-H<sub>2</sub>O</b>      |
| 300.1 | <b>DSD-H<sub>2</sub>O</b> | 615.3               | <b>a<sub>7</sub></b>                | 917.3 | <b>ENSDS DATN-NH<sub>3</sub></b>     | 1244.5 | <b>GVDGE NSDSD ATN-H<sub>2</sub>O</b> | 1939.7 | <b>b<sub>17</sub>-NH<sub>3</sub></b>      |
| 300.1 | <b>NSD-NH<sub>3</sub></b> | 618.2               | <b>DGENS D</b>                      | 919.3 | <b>VDGEN SDSD</b>                    | 1245.5 | <b>GVDGE NSDSD ATN-NH<sub>3</sub></b> | 1941.8 | <b>VDGEN SDSDA TNNAvL</b>                 |
| 300.1 | <b>NNA</b>                | 620.2               | <b>ENSDS D-28</b>                   | 919.3 | <b>NSDSD ATNN</b>                    | 1262.5 | <b>GVDGE NSDSD ATN</b>                | 1941.8 | <b>GENSD SDATN NAvLTI</b>                 |
| 300.2 | <b>LTI-28</b>             | 623.3               | <b>AvL</b>                          | 923.5 | <b>NAvLTI-28</b>                     | 1263.5 | <b>DGENS DSDAT NNA-28</b>             | 1943.7 | <b>DGENS DSDAT NNAvLT</b>                 |
| 301.1 | <b>GEN</b>                | 624.2               | <b>NAv</b>                          | 924.4 | <b>TNNAvL-28</b>                     | 1273.5 | <b>DGENS DSDAT NNA-H<sub>2</sub>O</b> | 1956.7 | <b>b<sub>17</sub></b>                     |
| 301.2 | <b>GVDG-28</b>            | 625.3               | <b>b<sub>7</sub>-H<sub>2</sub>O</b> | 924.4 | <b>NNAvLT-28</b>                     | 1274.4 | <b>DGENS DSDAT NNA-NH<sub>3</sub></b> | 1970.8 | <b>GVDGE NSDSD ATNNAvL-28</b>             |
| 302.1 | <b>DGE</b>                | 625.3               | <b>vLT-28</b>                       | 932.4 | <b>b<sub>10</sub></b>                | 1286.5 | <b>SDSDA TNNAv-28</b>                 | 1980.8 | <b>GVDGE NSDSD ATNNAvL-H<sub>2</sub>O</b> |
| 302.1 | <b>TNN-28</b>             | 626.2               | <b>b<sub>7</sub>-NH<sub>3</sub></b> | 933.4 | <b>NAvLTI-H<sub>2</sub>O</b>         | 1288.5 | <b>a<sub>14</sub>-NH<sub>3</sub></b>  | 1981.8 | <b>GVDGE NSDSD ATNNAvL-NH<sub>3</sub></b> |
| 303.1 | <b>ENS-28</b>             | 630.2               | <b>ENSDS D-H<sub>2</sub>O</b>       | 934.3 | <b>ENSDS DATN</b>                    | 1291.5 | <b>DGENS DSDAT NNA</b>                | 1998.8 | <b>GVDGE NSDSD ATNNA</b>                  |

|       |                                  |                     |                                                |                            |                                                     |        |                                            |        |                                                |
|-------|----------------------------------|---------------------|------------------------------------------------|----------------------------|-----------------------------------------------------|--------|--------------------------------------------|--------|------------------------------------------------|
|       |                                  |                     |                                                |                            |                                                     |        |                                            |        | vL                                             |
| 310.2 | LTI-H <sub>2</sub> O             | 631.2               | ENSDS<br>D-NH <sub>3</sub>                     | 934.4                      | TNNAvL<br>-H <sub>2</sub> O                         | 1291.5 | VDGEN<br>SDSDA<br>TNN-28                   | 2012.9 | y <sub>16</sub> -H <sub>2</sub> O              |
| 311.1 | GVDG-<br>H <sub>2</sub> O        | 631.3               | GVDGE<br>NS-28                                 | 934.4                      | NNAvLT<br>-H <sub>2</sub> O                         | 1294.6 | y <sub>9</sub> -H <sub>2</sub> O           | 2013.9 | y <sub>16</sub> -NH <sub>3</sub>               |
| 312.1 | TNN-<br>H <sub>2</sub> O         | 635.3               | vLT-H <sub>2</sub> O                           | 934.4                      | NAvLTI-<br>NH <sub>3</sub>                          | 1295.6 | y <sub>9</sub> -NH <sub>3</sub>            | 2014.8 | VDGEN<br>SDSDA<br>TNNAvL<br>T-28               |
| 313.1 | TNN-<br>NH <sub>3</sub>          | 641.3               | GVDGE<br>NS-H <sub>2</sub> O                   | 935.4                      | NNAvLT<br>-NH <sub>3</sub>                          | 1296.5 | SDSDA<br>TNNAv-<br>H <sub>2</sub> O        | 2024.8 | VDGEN<br>SDSDA<br>TNNAvL<br>T-H <sub>2</sub> O |
| 313.1 | ENS-<br>H <sub>2</sub> O         | 642.2               | GVDGE<br>NS-NH <sub>3</sub>                    | 935.4                      | TNNAvL<br>-NH <sub>3</sub>                          | 1297.5 | SDSDA<br>TNNAv-<br>NH <sub>3</sub>         | 2024.8 | a <sub>18</sub> -NH <sub>3</sub>               |
| 314.1 | ENS-<br>NH <sub>3</sub>          | 643.3               | b <sub>7</sub>                                 | 942.421<br>3 <sup>+2</sup> | y <sub>15</sub> -<br>H <sub>2</sub> O <sup>+2</sup> | 1298.6 | SDATN<br>NAvLT-<br>28                      | 2025.8 | VDGEN<br>SDSDA<br>TNNAvL<br>T-NH <sub>3</sub>  |
| 315.2 | a <sub>4</sub>                   | 646.3               | SDATN<br>NA-28                                 | 942.9 <sup>+2</sup>        | y <sub>15</sub> -<br>NH <sub>3</sub> <sup>+2</sup>  | 1301.5 | VDGEN<br>SDSDA<br>TNN-<br>H <sub>2</sub> O | 2028.8 | DGENS<br>DSDAT<br>NNAvLT<br>I-28               |
| 317.1 | NSD                              | 647.8 <sup>+2</sup> | y <sub>9</sub> -H <sub>2</sub> O <sup>+2</sup> | 948.4                      | GVDGE<br>NSDSD-<br>28                               | 1302.5 | VDGEN<br>SDSDA<br>TNN-<br>NH <sub>3</sub>  | 2030.9 | y <sub>16</sub>                                |
| 318.1 | DSD                              | 648.2               | ENSDS<br>D                                     | 951.4 <sup>+2</sup>        | y <sub>15</sub> <sup>+2</sup>                       | 1305.5 | a <sub>14</sub>                            | 2038.8 | DGENS<br>DSDAT<br>NNAvLT<br>I-H <sub>2</sub> O |
| 325.2 | b <sub>4</sub> -H <sub>2</sub> O | 648.3 <sup>+2</sup> | y <sub>9</sub> -NH <sub>3</sub> <sup>+2</sup>  | 951.5                      | NAvLTI                                              | 1308.5 | SDATN<br>NAvLT-<br>H <sub>2</sub> O        | 2039.8 | DGENS<br>DSDAT<br>NNAvLT<br>I-NH <sub>3</sub>  |
| 328.2 | LTI                              | 653.3               | vLT                                            | 952.4                      | NNAvLT                                              | 1309.5 | SDATN<br>NAvLT-<br>NH <sub>3</sub>         | 2041.8 | a <sub>18</sub>                                |
| 329.1 | GVDG                             | 656.3               | SDATN<br>NA-H <sub>2</sub> O                   | 952.4                      | TNNAvL                                              | 1312.5 | DSDAT<br>NNAvL-<br>28                      | 2042.8 | VDGEN<br>SDSDA<br>TNNAvL<br>T                  |
| 330.1 | TNN                              | 656.8 <sup>+2</sup> | y <sub>9</sub> <sup>+2</sup>                   | 958.3                      | GVDGE<br>NSDSD-<br>H <sub>2</sub> O                 | 1312.6 | y <sub>9</sub>                             | 2051.8 | b <sub>18</sub> -H <sub>2</sub> O              |
| 331.1 | ENS                              | 657.2               | SDATN<br>NA-NH <sub>3</sub>                    | 959.3                      | GVDGE<br>NSDSD-<br>NH <sub>3</sub>                  | 1314.5 | SDSDA<br>TNNAv                             | 2052.8 | b <sub>18</sub> -NH <sub>3</sub>               |
| 343.2 | b <sub>4</sub>                   | 659.3               | GVDGE<br>NS                                    | 962.4                      | VDGEN<br>SDSDA-<br>28                               | 1315.5 | b <sub>14</sub> -H <sub>2</sub> O          | 2056.8 | DGENS<br>DSDAT<br>NNAvLT<br>I                  |

|       |                                     |                     |                                                        |       |                                            |        |                                                     |        |                                                              |
|-------|-------------------------------------|---------------------|--------------------------------------------------------|-------|--------------------------------------------|--------|-----------------------------------------------------|--------|--------------------------------------------------------------|
| 343.2 | <b>y<sub>3</sub>-H<sub>2</sub>O</b> | 663.3               | <b>SDSDA<br/>TN-28</b>                                 | 962.4 | <b>NSDSD<br/>ATNNA-<br/>28</b>             | 1316.5 | <b>b<sub>14</sub>-NH<sub>3</sub></b>                | 2069.8 | <b>b<sub>18</sub></b>                                        |
| 344.2 | <b>y<sub>3</sub>-NH<sub>3</sub></b> | 663.3               | <b>NSDSD<br/>AT-28</b>                                 | 963.4 | <b>GENSD<br/>SDATN-<br/>28</b>             | 1319.5 | <b>VDGEN<br/>SDSDA<br/>TNN</b>                      | 2069.9 | <b>y<sub>17</sub>-H<sub>2</sub>O</b>                         |
| 347.2 | <b>SDAT-<br/>28</b>                 | 673.2               | <b>NSDSD<br/>AT-H<sub>2</sub>O</b>                     | 964.3 | <b>DGENS<br/>DSDAT-<br/>28</b>             | 1322.5 | <b>DSDAT<br/>NNAvL-<br/>H<sub>2</sub>O</b>          | 2070.9 | <b>y<sub>17</sub>-NH<sub>3</sub></b>                         |
| 357.1 | <b>SDAT-<br/>H<sub>2</sub>O</b>     | 673.2               | <b>SDSDA<br/>TN-H<sub>2</sub>O</b>                     | 965.5 | <b>y<sub>6</sub>-H<sub>2</sub>O</b>        | 1323.5 | <b>DSDAT<br/>NNAvL-<br/>NH<sub>3</sub></b>          | 2071.8 | <b>GVDGE<br/>NSDSD<br/>ATNNA<br/>vLT-28</b>                  |
| 360.2 | <b>GENS-<br/>28</b>                 | 674.2               | <b>SDSDA<br/>TN-NH<sub>3</sub></b>                     | 966.5 | <b>y<sub>6</sub>-NH<sub>3</sub></b>        | 1324.6 | <b>DATNN<br/>AvLTI-<br/>28</b>                      | 2081.8 | <b>GVDGE<br/>NSDSD<br/>ATNNA<br/>vLT-<br/>H<sub>2</sub>O</b> |
| 361.1 | <b>DSDA-<br/>28</b>                 | 674.2               | <b>NSDSD<br/>AT-NH<sub>3</sub></b>                     | 972.4 | <b>VDGEN<br/>SDSDA-<br/>H<sub>2</sub>O</b> | 1326.6 | <b>SDATN<br/>NAvLT</b>                              | 2082.8 | <b>GVDGE<br/>NSDSD<br/>ATNNA<br/>vLT-NH<sub>3</sub></b>      |
| 361.2 | <b>y<sub>3</sub></b>                | 674.3               | <b>SDATN<br/>NA</b>                                    | 972.4 | <b>NSDSD<br/>ATNNA-<br/>H<sub>2</sub>O</b> | 1333.5 | <b>b<sub>14</sub></b>                               | 2087.9 | <b>y<sub>17</sub></b>                                        |
| 370.1 | <b>GENS-<br/>H<sub>2</sub>O</b>     | 677.2               | <b>DGENS<br/>DS-28</b>                                 | 973.3 | <b>VDGEN<br/>SDSDA-<br/>NH<sub>3</sub></b> | 1334.6 | <b>DATNN<br/>AvLTI-<br/>H<sub>2</sub>O</b>          | 2099.8 | <b>GVDGE<br/>NSDSD<br/>ATNNA<br/>vLT</b>                     |
| 371.1 | <b>DSDA-<br/>H<sub>2</sub>O</b>     | 677.2               | <b>GENSD<br/>SD-28</b>                                 | 973.3 | <b>GENSD<br/>SDATN-<br/>H<sub>2</sub>O</b> | 1335.6 | <b>DATNN<br/>AvLTI-<br/>NH<sub>3</sub></b>          | 2125.9 | <b>a<sub>19</sub>-NH<sub>3</sub></b>                         |
| 371.1 | <b>GENS-<br/>NH<sub>3</sub></b>     | 683.3 <sup>+2</sup> | <b>y<sub>10</sub>-<br/>H<sub>2</sub>O<sup>+2</sup></b> | 973.3 | <b>NSDSD<br/>ATNNA-<br/>NH<sub>3</sub></b> | 1340.5 | <b>DSDAT<br/>NNAvL</b>                              | 2127.9 | <b>VDGEN<br/>SDSDA<br/>TNNAvL<br/>TI-28</b>                  |
| 372.2 | <b>a<sub>5</sub></b>                | 683.8 <sup>+2</sup> | <b>y<sub>10</sub>-<br/>NH<sub>3</sub><sup>+2</sup></b> | 974.3 | <b>DGENS<br/>DSDAT-<br/>H<sub>2</sub>O</b> | 1348.5 | <b>GVDGE<br/>NSDSD<br/>ATNN-<br/>28</b>             | 2137.9 | <b>VDGEN<br/>SDSDA<br/>TNNAvL<br/>TI-H<sub>2</sub>O</b>      |
| 373.2 | <b>VDGE-<br/>28</b>                 | 685.3               | <b>a<sub>8</sub>-NH<sub>3</sub></b>                    | 974.3 | <b>GENSD<br/>SDATN-<br/>NH<sub>3</sub></b> | 1352.6 | <b>DATNN<br/>AvLTI</b>                              | 2138.9 | <b>VDGEN<br/>SDSDA<br/>TNNAvL<br/>TI-NH<sub>3</sub></b>      |
| 373.2 | <b>TNNA-<br/>28</b>                 | 687.2               | <b>GENSD<br/>SD-H<sub>2</sub>O</b>                     | 975.3 | <b>DGENS<br/>DSDAT-<br/>NH<sub>3</sub></b> | 1358.5 | <b>GVDGE<br/>NSDSD<br/>ATNN-<br/>H<sub>2</sub>O</b> | 2142.9 | <b>a<sub>19</sub></b>                                        |
| 373.2 | <b>ATNN-<br/>28</b>                 | 687.2               | <b>DGENS<br/>DS-H<sub>2</sub>O</b>                     | 976.3 | <b>GVDGE<br/>NSDSD</b>                     | 1359.5 | <b>GVDGE<br/>NSDSD<br/>ATNN-<br/>NH<sub>3</sub></b> | 2152.9 | <b>b<sub>19</sub>-H<sub>2</sub>O</b>                         |
| 374.2 | <b>DATN-<br/>28</b>                 | 688.2               | <b>DGENS<br/>DS-NH<sub>3</sub></b>                     | 983.5 | <b>y<sub>6</sub></b>                       | 1362.5 | <b>VDGEN<br/>SDSDA<br/>TNNA-<br/>28</b>             | 2153.8 | <b>b<sub>19</sub>-NH<sub>3</sub></b>                         |

|       |                                     |                     |                                    |                      |                                                                   |        |                                                    |        |                                                               |
|-------|-------------------------------------|---------------------|------------------------------------|----------------------|-------------------------------------------------------------------|--------|----------------------------------------------------|--------|---------------------------------------------------------------|
| 375.2 | <b>SDAT</b>                         | 688.2               | <b>GENSD<br/>SD-NH<sub>3</sub></b> | 990.4                | <b>VDGEN<br/>SDSDA</b>                                            | 1365.7 | <b>y<sub>10</sub>-H<sub>2</sub>O</b>               | 2155.9 | <b>VDGEN<br/>SDSDA<br/>TNNAvL<br/>TI</b>                      |
| 376.1 | <b>NSDS-<br/>28</b>                 | 689.3               | <b>VDGEN<br/>SD-28</b>             | 990.4                | <b>NSDSD<br/>ATNNA</b>                                            | 1366.7 | <b>y<sub>10</sub>-NH<sub>3</sub></b>               | 2170.9 | <b>b<sub>19</sub></b>                                         |
| 377.1 | <b>SDSD-<br/>28</b>                 | 690.3               | <b>DSDAT<br/>NN-28</b>             | 991.4                | <b>GENSD<br/>SDATN</b>                                            | 1372.5 | <b>VDGEN<br/>SDSDA<br/>TNN-<br/>H<sub>2</sub>O</b> | 2184.9 | <b>GVDGE<br/>NSDSD<br/>ATNNA<br/>vLTI-28</b>                  |
| 382.2 | <b>b<sub>5</sub>-H<sub>2</sub>O</b> | 691.3               | <b>SDSDA<br/>TN</b>                | 992.3                | <b>DGENS<br/>DSDAT</b>                                            | 1373.5 | <b>VDGEN<br/>SDSDA<br/>TNN-<br/>NH<sub>3</sub></b> | 2184.9 | <b>y<sub>18</sub>-H<sub>2</sub>O</b>                          |
| 383.2 | <b>VDGE-<br/>H<sub>2</sub>O</b>     | 691.3               | <b>NSDSD<br/>AT</b>                | 995.5                | <b>ATNNA<br/>vL-28</b>                                            | 1376.5 | <b>GVDGE<br/>NSDSD<br/>ATNN</b>                    | 2185.9 | <b>y<sub>18</sub>-NH<sub>3</sub></b>                          |
| 383.2 | <b>TNNA-<br/>H<sub>2</sub>O</b>     | 691.3               | <b>ENSDS<br/>DA-28</b>             | 997.4                | <b>DATNN<br/>Av-28</b>                                            | 1383.7 | <b>y<sub>10</sub></b>                              | 2194.9 | <b>GVDGE<br/>NSDSD<br/>ATNNA<br/>vLTI-<br/>H<sub>2</sub>O</b> |
| 383.2 | <b>ATNN-<br/>H<sub>2</sub>O</b>     | 692.4 <sup>+2</sup> | <b>y<sub>10</sub><sup>+2</sup></b> | 1002.4               | <b>a<sub>11</sub>-NH<sub>3</sub></b>                              | 1390.5 | <b>VDGEN<br/>SDSDA<br/>TNNA</b>                    | 2195.9 | <b>GVDGE<br/>NSDSD<br/>ATNNA<br/>vLTI-<br/>NH<sub>3</sub></b> |
| 384.2 | <b>DATN-<br/>H<sub>2</sub>O</b>     | 696.3               | <b>AvLT-28</b>                     | 1005.4               | <b>ATNNA<br/>vL-H<sub>2</sub>O</b>                                | 1399.6 | <b>SDSDA<br/>TNNAvL<br/>-28</b>                    | 2202.9 | <b>y<sub>18</sub></b>                                         |
| 384.2 | <b>ATNN-<br/>NH<sub>3</sub></b>     | 699.3               | <b>VDGEN<br/>SD-H<sub>2</sub>O</b> | 1006.4               | <b>ATNNA<br/>vL-NH<sub>3</sub></b>                                | 1400.5 | <b>NSDSD<br/>ATNNA<br/>v-28</b>                    | 2212.9 | <b>GVDGE<br/>NSDSD<br/>ATNNA<br/>vLTI</b>                     |
| 384.2 | <b>TNNA-<br/>NH<sub>3</sub></b>     | 700.2               | <b>VDGEN<br/>SD-NH<sub>3</sub></b> | 1006.9 <sup>+2</sup> | <b>y<sub>16</sub><sup>-</sup><br/>H<sub>2</sub>O<sup>+2</sup></b> | 1402.5 | <b>a<sub>15</sub>-NH<sub>3</sub></b>               | 2238.9 | <b>a<sub>20</sub>-NH<sub>3</sub></b>                          |
| 385.1 | <b>DATN-<br/>NH<sub>3</sub></b>     | 700.3               | <b>DSDAT<br/>NN-H<sub>2</sub>O</b> | 1007.4               | <b>DATNN<br/>Av-H<sub>2</sub>O</b>                                | 1409.6 | <b>SDSDA<br/>TNNAvL<br/>-H<sub>2</sub>O</b>        | 2256.0 | <b>a<sub>20</sub></b>                                         |
| 386.1 | <b>NSDS-<br/>H<sub>2</sub>O</b>     | 701.2               | <b>ENSDS<br/>DA-H<sub>2</sub>O</b> | 1007.4 <sup>+2</sup> | <b>y<sub>16</sub><sup>-</sup><br/>NH<sub>3</sub><sup>+2</sup></b> | 1410.5 | <b>NSDSD<br/>ATNNA<br/>v-H<sub>2</sub>O</b>        | 2265.9 | <b>b<sub>20</sub>-H<sub>2</sub>O</b>                          |
| 387.1 | <b>SDSD-<br/>H<sub>2</sub>O</b>     | 701.2               | <b>DSDAT<br/>NN-NH<sub>3</sub></b> | 1008.4               | <b>DATNN<br/>Av-NH<sub>3</sub></b>                                | 1410.5 | <b>SDSDA<br/>TNNAvL<br/>-NH<sub>3</sub></b>        | 2266.9 | <b>b<sub>20</sub>-NH<sub>3</sub></b>                          |
| 387.1 | <b>NSDS-<br/>NH<sub>3</sub></b>     | 702.2               | <b>ENSDS<br/>DA-NH<sub>3</sub></b> | 1015.0 <sup>+2</sup> | <b>y<sub>16</sub><sup>+2</sup></b>                                | 1411.5 | <b>NSDSD<br/>ATNNA<br/>v-NH<sub>3</sub></b>        | 2284.0 | <b>b<sub>20</sub></b>                                         |
| 388.1 | <b>DGEN-<br/>28</b>                 | 702.3               | <b>a<sub>8</sub></b>               | 1019.4               | <b>a<sub>11</sub></b>                                             | 1411.6 | <b>SDATN<br/>NAvLTI-<br/>28</b>                    | 2284.0 | <b>y<sub>19</sub>-H<sub>2</sub>O</b>                          |
| 388.1 | <b>GENS</b>                         | 705.2               | <b>GENSD<br/>SD</b>                | 1019.4               | <b>GVDGE<br/>NSDSD<br/>A-28</b>                                   | 1413.6 | <b>DSDAT<br/>NNAvLT<br/>-28</b>                    | 2285.0 | <b>y<sub>19</sub>-NH<sub>3</sub></b>                          |
| 389.1 | <b>DSDA</b>                         | 705.2               | <b>DGENS<br/>DS</b>                | 1020.4               | <b>ENSDS<br/>DATNN-<br/>28</b>                                    | 1419.6 | <b>GVDGE<br/>NSDSD<br/>ATNNA-<br/>28</b>           | 2302.0 | <b>y<sub>19</sub></b>                                         |

|       |                       |       |                                  |        |                                   |        |                                    |        |                                   |
|-------|-----------------------|-------|----------------------------------|--------|-----------------------------------|--------|------------------------------------|--------|-----------------------------------|
| 398.1 | DGEN-H <sub>2</sub> O | 706.3 | AvLT-H <sub>2</sub> O            | 1023.4 | ATNNA vL                          | 1419.6 | a <sub>15</sub>                    | 2341.0 | y <sub>20</sub> -H <sub>2</sub> O |
| 399.1 | DGEN-NH <sub>3</sub>  | 709.3 | NAvL-28                          | 1025.4 | DATNN Av                          | 1421.6 | SDATN NAvLTI-H <sub>2</sub> O      | 2342.0 | y <sub>20</sub> -NH <sub>3</sub>  |
| 400.2 | b <sub>5</sub>        | 710.3 | NNAv-28                          | 1025.5 | TNNAvL T-28                       | 1422.6 | SDATN NAvLTI-NH <sub>3</sub>       | 2359.0 | y <sub>20</sub>                   |
| 401.2 | VDGE                  | 712.3 | b <sub>8</sub> -H <sub>2</sub> O | 1029.4 | GVDGE NSDSD A-H <sub>2</sub> O    | 1423.6 | DSDAT NNAvLT-H <sub>2</sub> O      | 2412.1 | MH-H <sub>2</sub> O               |
| 401.2 | ATNN                  | 713.3 | b <sub>8</sub> -NH <sub>3</sub>  | 1029.4 | b <sub>11</sub> -H <sub>2</sub> O | 1424.6 | DSDAT NNAvLT-NH <sub>3</sub>       | 2413.0 | MH-NH <sub>3</sub>                |
| 401.2 | TNNA                  | 717.3 | VDGEN SD                         | 1030.4 | b <sub>11</sub> -NH <sub>3</sub>  | 1427.6 | SDSDA TNNAvL                       | 2430.1 | MH                                |
| 402.2 | DATN                  | 718.3 | DSDAT NN                         | 1030.4 | GVDGE NSDSD A-NH <sub>3</sub>     | 1428.5 | NSDSDATNNAv                        |        |                                   |
| 404.1 | NSDS                  | 719.2 | ENSDDS DA                        | 1030.4 | ENSDDS DATNN-H <sub>2</sub> O     | 1429.5 | GVDGENSDDS DATNNA-H <sub>2</sub> O |        |                                   |
| 405.1 | SDSD                  | 720.3 | NAvL-NH <sub>3</sub>             | 1031.4 | ENSDDS DATNN-NH <sub>3</sub>      | 1429.5 | b <sub>15</sub> -H <sub>2</sub> O  |        |                                   |

## LTQDLNISGFNK

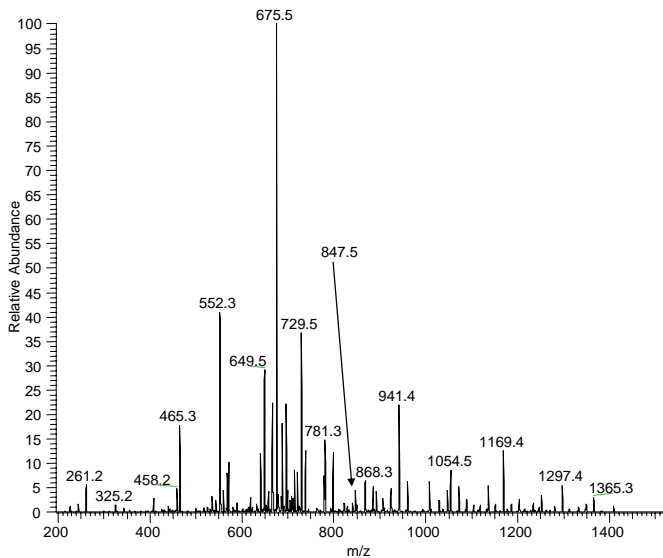

|                    |                                               |                     |                                               |       |                        |       |                       |        |                                 |
|--------------------|-----------------------------------------------|---------------------|-----------------------------------------------|-------|------------------------|-------|-----------------------|--------|---------------------------------|
| 60.0               | S                                             | 268.1 <sup>+2</sup> | y <sub>5</sub> -NH <sub>3</sub> <sup>+2</sup> | 491.3 | ISGFN-28               | 729.3 | QDLuI-NH <sub>3</sub> | 995.5  | DLuISGFN-28                     |
| 65.6 <sup>+2</sup> | y <sub>1</sub> -NH <sub>3</sub> <sup>+2</sup> | 274.1               | SGF-H <sub>2</sub> O                          | 501.2 | ISGFN-H <sub>2</sub> O | 734.3 | TQDLu                 | 1002.5 | a <sub>8</sub> -NH <sub>3</sub> |
| 74.1               | T                                             | 276.6 <sup>+2</sup> | y <sub>5</sub> <sup>+2</sup>                  | 502.2 | ISGFN-NH <sub>3</sub>  | 734.4 | DLuISGF-28            | 1005.5 | DLuISGFN-H <sub>2</sub> O       |

|                     |                                                  |                     |                                                  |                     |                                                  |                     |                                       |        |                                     |
|---------------------|--------------------------------------------------|---------------------|--------------------------------------------------|---------------------|--------------------------------------------------|---------------------|---------------------------------------|--------|-------------------------------------|
| 74.1 <sup>+2</sup>  | <b>y<sub>1</sub><sup>+2</sup></b>                | 291.1               | <b>GFN-28</b>                                    | 503.3               | <b>Lul</b>                                       | 744.3               | <b>DLuISG-H<sub>2</sub>O</b>          | 1006.4 | <b>DLuISG FN-NH<sub>3</sub></b>     |
| 84.1                | <b>Q</b>                                         | 292.1               | <b>SGF</b>                                       | 505.2               | <b>DLu</b>                                       | 746.4               | <b>QDLul</b>                          | 1009.5 | <b>QDLuIS GF-28</b>                 |
| 84.1                | <b>K</b>                                         | 298.2               | <b>a<sub>3</sub>-NH<sub>3</sub></b>              | 506.2               | <b>ulISG-28</b>                                  | 747.4 <sup>+2</sup> | <b>MH-H<sub>2</sub>O<sup>+2</sup></b> | 1019.5 | <b>QDLuIS GF-H<sub>2</sub>O</b>     |
| 86.1                | <b>L</b>                                         | 302.1               | <b>GFN-NH<sub>3</sub></b>                        | 516.2               | <b>ulISG-H<sub>2</sub>O</b>                      | 747.9 <sup>+2</sup> | <b>MH-NH<sub>3</sub><sup>+2</sup></b> | 1019.5 | <b>a<sub>8</sub></b>                |
| 86.1                | <b>I</b>                                         | 315.2               | <b>a<sub>3</sub></b>                             | 518.8 <sup>+2</sup> | <b>y<sub>8</sub>-H<sub>2</sub>O<sup>+2</sup></b> | 756.4 <sup>+2</sup> | <b>MH<sup>+2</sup></b>                | 1020.5 | <b>QDLuIS GF-NH<sub>3</sub></b>     |
| 87.1                | <b>N</b>                                         | 317.1               | <b>TQD-28</b>                                    | 519.3               | <b>ISGFN</b>                                     | 762.4               | <b>DLuISG</b>                         | 1023.5 | <b>DLuISG FN</b>                    |
| 88.0                | <b>D</b>                                         | 319.1               | <b>GFN</b>                                       | 519.2 <sup>+2</sup> | <b>y<sub>8</sub>-NH<sub>3</sub><sup>+2</sup></b> | 766.4               | <b>LulISGF-28</b>                     | 1029.5 | <b>b<sub>8</sub>-H<sub>2</sub>O</b> |
| 101.1               | <b>Q</b>                                         | 324.2 <sup>+2</sup> | <b>y<sub>6</sub>-H<sub>2</sub>O<sup>+2</sup></b> | 526.3               | <b>a<sub>5</sub>-NH<sub>3</sub></b>              | 767.4               | <b>ulISGFN-28</b>                     | 1030.5 | <b>b<sub>8</sub>-NH<sub>3</sub></b> |
| 101.1               | <b>K</b>                                         | 324.7 <sup>+2</sup> | <b>y<sub>6</sub>-NH<sub>3</sub><sup>+2</sup></b> | 527.8 <sup>+2</sup> | <b>y<sub>8</sub><sup>+2</sup></b>                | 776.4               | <b>LulISGF-H<sub>2</sub>O</b>         | 1036.5 | <b>y<sub>8</sub>-H<sub>2</sub>O</b> |
| 117.1               | <b>SG-28</b>                                     | 325.2               | <b>b<sub>3</sub>-H<sub>2</sub>O</b>              | 534.2               | <b>ulISG</b>                                     | 777.3               | <b>ulISGFN-H<sub>2</sub>O</b>         | 1037.5 | <b>QDLuIS GF</b>                    |
| 120.1               | <b>F</b>                                         | 326.2               | <b>b<sub>3</sub>-NH<sub>3</sub></b>              | 534.3               | <b>y<sub>5</sub>-H<sub>2</sub>O</b>              | 778.3               | <b>ulISGFN-NH<sub>3</sub></b>         | 1037.5 | <b>y<sub>8</sub>-NH<sub>3</sub></b> |
| 122.6 <sup>+2</sup> | <b>y<sub>2</sub>-NH<sub>3</sub><sup>+2</sup></b> | 327.1               | <b>TQD-H<sub>2</sub>O</b>                        | 535.3               | <b>y<sub>5</sub>-NH<sub>3</sub></b>              | 794.4               | <b>LulISGF</b>                        | 1047.5 | <b>b<sub>8</sub></b>                |
| 126.1               | <b>K</b>                                         | 328.1               | <b>TQD-NH<sub>3</sub></b>                        | 543.3               | <b>a<sub>5</sub></b>                             | 795.4               | <b>ulISGFN</b>                        | 1054.5 | <b>y<sub>8</sub></b>                |
| 127.1               | <b>SG-H<sub>2</sub>O</b>                         | 329.2               | <b>QDL-28</b>                                    | 552.3               | <b>y<sub>5</sub></b>                             | 802.4               | <b>a<sub>6</sub>-NH<sub>3</sub></b>   | 1059.5 | <b>a<sub>9</sub>-NH<sub>3</sub></b> |
| 129.1               | <b>Q</b>                                         | 333.2 <sup>+2</sup> | <b>y<sub>6</sub><sup>+2</sup></b>                | 553.3               | <b>b<sub>5</sub>-H<sub>2</sub>O</b>              | 805.4               | <b>QDLuIS-28</b>                      | 1076.5 | <b>a<sub>9</sub></b>                |
| 129.1               | <b>K</b>                                         | 339.2               | <b>QDL-H<sub>2</sub>O</b>                        | 554.3               | <b>b<sub>5</sub>-NH<sub>3</sub></b>              | 815.4               | <b>QDLuIS-H<sub>2</sub>O</b>          | 1086.5 | <b>b<sub>9</sub>-H<sub>2</sub>O</b> |
| 130.1               | <b>y<sub>1</sub>-NH<sub>3</sub></b>              | 340.2               | <b>QDL-NH<sub>3</sub></b>                        | 562.3               | <b>LulS-28</b>                                   | 816.4               | <b>QDLuIS-NH<sub>3</sub></b>          | 1087.5 | <b>b<sub>9</sub>-NH<sub>3</sub></b> |
| 131.1 <sup>+2</sup> | <b>y<sub>2</sub><sup>+2</sup></b>                | 343.2               | <b>b<sub>3</sub></b>                             | 571.3               | <b>b<sub>5</sub></b>                             | 819.4               | <b>TQDLul-28</b>                      | 1104.5 | <b>b<sub>9</sub></b>                |
| 145.1               | <b>SG</b>                                        | 345.1               | <b>TQD</b>                                       | 572.3               | <b>LulS-H<sub>2</sub>O</b>                       | 819.4               | <b>a<sub>6</sub></b>                  | 1110.5 | <b>TQDLul SGF-28</b>                |
| 147.1               | <b>y<sub>1</sub></b>                             | 357.2               | <b>QDL</b>                                       | 576.3 <sup>+2</sup> | <b>y<sub>9</sub>-H<sub>2</sub>O<sup>+2</sup></b> | 829.4               | <b>b<sub>6</sub>-H<sub>2</sub>O</b>   | 1120.5 | <b>TQDLul SGF-H<sub>2</sub>O</b>    |
| 173.1               | <b>IS-28</b>                                     | 362.2               | <b>ul-28</b>                                     | 576.8 <sup>+2</sup> | <b>y<sub>9</sub>-NH<sub>3</sub><sup>+2</sup></b> | 829.4               | <b>TQDLul-H<sub>2</sub>O</b>          | 1121.5 | <b>TQDLul SGF-NH<sub>3</sub></b>    |
| 177.1               | <b>GF-28</b>                                     | 362.2               | <b>Lu-28</b>                                     | 585.3 <sup>+2</sup> | <b>y<sub>9</sub><sup>+2</sup></b>                | 830.4               | <b>b<sub>6</sub>-NH<sub>3</sub></b>   | 1123.5 | <b>QDLuIS GFN-28</b>                |
| 183.1               | <b>IS-H<sub>2</sub>O</b>                         | 377.2               | <b>ISGF-28</b>                                   | 590.3               | <b>DLul-28</b>                                   | 830.4               | <b>TQDLul-NH<sub>3</sub></b>          | 1133.5 | <b>QDLuIS GFN-H<sub>2</sub>O</b>    |
| 187.1               | <b>a<sub>2</sub></b>                             | 378.2               | <b>SGFN-28</b>                                   | 590.3               | <b>LulS</b>                                      | 833.4               | <b>QDLuIS</b>                         | 1134.5 | <b>QDLuIS GFN-NH<sub>3</sub></b>    |
| 196.1 <sup>+2</sup> | <b>y<sub>3</sub>-NH<sub>3</sub><sup>+2</sup></b> | 387.2               | <b>ISGF-H<sub>2</sub>O</b>                       | 600.3               | <b>DLul-H<sub>2</sub>O</b>                       | 847.4               | <b>TQDLul</b>                         | 1138.5 | <b>TQDLul SGF</b>                   |
| 197.1               | <b>b<sub>2</sub>-H<sub>2</sub>O</b>              | 388.2               | <b>SGFN-H<sub>2</sub>O</b>                       | 605.3               | <b>QDLu-28</b>                                   | 847.4               | <b>b<sub>6</sub></b>                  | 1151.5 | <b>QDLuIS GFN</b>                   |

|                     |                                                  |                     |                                                  |                     |                                                               |       |                                     |        |                                      |
|---------------------|--------------------------------------------------|---------------------|--------------------------------------------------|---------------------|---------------------------------------------------------------|-------|-------------------------------------|--------|--------------------------------------|
| 201.1               | <b>IS</b>                                        | 389.1               | <b>SGFN-NH<sub>3</sub></b>                       | 615.3               | <b>QDLu-H<sub>2</sub>O</b>                                    | 862.4 | <b>QDLuIS G-28</b>                  | 1151.6 | <b>y<sub>9</sub>-H<sub>2</sub>O</b>  |
| 201.1               | <b>DL-28</b>                                     | 390.2               | <b>Lu</b>                                        | 616.2               | <b>QDLu-NH<sub>3</sub></b>                                    | 872.4 | <b>QDLuIS G-H<sub>2</sub>O</b>      | 1152.5 | <b>y<sub>9</sub>-NH<sub>3</sub></b>  |
| 202.1               | <b>TQ-28</b>                                     | 390.2               | <b>ul</b>                                        | 618.3               | <b>DLul</b>                                                   | 873.4 | <b>QDLuIS G-NH<sub>3</sub></b>      | 1169.6 | <b>y<sub>9</sub></b>                 |
| 204.6 <sup>+2</sup> | <b>y<sub>3</sub><sup>+2</sup></b>                | 391.2               | <b>y<sub>3</sub>-NH<sub>3</sub></b>              | 619.3               | <b>LuISG-28</b>                                               | 880.4 | <b>LuISGF N-28</b>                  | 1206.6 | <b>a<sub>10</sub>-NH<sub>3</sub></b> |
| 205.1               | <b>GF</b>                                        | 405.2               | <b>ISGF</b>                                      | 629.3               | <b>LuISG-H<sub>2</sub>O</b>                                   | 881.4 | <b>DLuISGF F-28</b>                 | 1223.6 | <b>a<sub>10</sub></b>                |
| 211.1               | <b>DL-H<sub>2</sub>O</b>                         | 406.2               | <b>SGFN</b>                                      | 633.3               | <b>QDLu</b>                                                   | 890.4 | <b>QDLuIS G</b>                     | 1224.6 | <b>TQDLul SGFN-28</b>                |
| 212.1               | <b>TQ-H<sub>2</sub>O</b>                         | 408.2               | <b>y<sub>3</sub></b>                             | 640.3 <sup>+2</sup> | <b>y<sub>10</sub><sup>-</sup>-H<sub>2</sub>O<sup>+2</sup></b> | 890.4 | <b>LuISGF N-H<sub>2</sub>O</b>      | 1233.6 | <b>b<sub>10</sub>-H<sub>2</sub>O</b> |
| 213.1               | <b>TQ-NH<sub>3</sub></b>                         | 413.2               | <b>a<sub>4</sub>-NH<sub>3</sub></b>              | 640.8 <sup>+2</sup> | <b>y<sub>10</sub><sup>-</sup>-NH<sub>3</sub><sup>+2</sup></b> | 891.4 | <b>DLuISGF F-H<sub>2</sub>O</b>     | 1234.6 | <b>TQDLul SGFN-H<sub>2</sub>O</b>    |
| 215.1               | <b>b<sub>2</sub></b>                             | 430.2               | <b>a<sub>4</sub></b>                             | 647.3               | <b>LuISG</b>                                                  | 891.4 | <b>LuISGF N-NH<sub>3</sub></b>      | 1234.6 | <b>b<sub>10</sub>-NH<sub>3</sub></b> |
| 216.1               | <b>QD-28</b>                                     | 430.2               | <b>TQDL-28</b>                                   | 647.4               | <b>y<sub>6</sub>-H<sub>2</sub>O</b>                           | 906.4 | <b>TQDLul S-28</b>                  | 1235.5 | <b>TQDLul SGFN-NH<sub>3</sub></b>    |
| 224.6 <sup>+2</sup> | <b>y<sub>4</sub>-NH<sub>3</sub><sup>+2</sup></b> | 440.2               | <b>TQDL-H<sub>2</sub>O</b>                       | 648.3               | <b>y<sub>6</sub>-NH<sub>3</sub></b>                           | 908.4 | <b>LuISGF N</b>                     | 1251.6 | <b>b<sub>10</sub></b>                |
| 226.1               | <b>QD-H<sub>2</sub>O</b>                         | 440.2               | <b>b<sub>4</sub>-H<sub>2</sub>O</b>              | 649.3 <sup>+2</sup> | <b>y<sub>10</sub><sup>+2</sup></b>                            | 909.4 | <b>DLuISGF F</b>                    | 1252.6 | <b>TQDLul SGFN</b>                   |
| 227.1               | <b>QD-NH<sub>3</sub></b>                         | 441.2               | <b>b<sub>4</sub>-NH<sub>3</sub></b>              | 653.3               | <b>ulISGF-28</b>                                              | 915.5 | <b>a<sub>7</sub>-NH<sub>3</sub></b> | 1279.6 | <b>y<sub>10</sub>-H<sub>2</sub>O</b> |
| 229.1               | <b>DL</b>                                        | 441.2               | <b>TQDL-NH<sub>3</sub></b>                       | 663.3               | <b>ulISGF-H<sub>2</sub>O</b>                                  | 916.4 | <b>TQDLul S-H<sub>2</sub>O</b>      | 1280.6 | <b>y<sub>10</sub>-NH<sub>3</sub></b> |
| 230.1               | <b>TQ</b>                                        | 448.2               | <b>y<sub>4</sub>-NH<sub>3</sub></b>              | 665.4               | <b>y<sub>6</sub></b>                                          | 917.4 | <b>TQDLul S-NH<sub>3</sub></b>      | 1297.6 | <b>y<sub>10</sub></b>                |
| 230.1               | <b>ISG-28</b>                                    | 449.2               | <b>ulS-28</b>                                    | 677.3               | <b>DLuIS-28</b>                                               | 923.4 | <b>y<sub>7</sub>-H<sub>2</sub>O</b> | 1320.6 | <b>a<sub>11</sub>-NH<sub>3</sub></b> |
| 233.1 <sup>+2</sup> | <b>y<sub>4</sub><sup>+2</sup></b>                | 458.2               | <b>b<sub>4</sub></b>                             | 681.3               | <b>ulISGF</b>                                                 | 924.4 | <b>y<sub>7</sub>-NH<sub>3</sub></b> | 1337.7 | <b>a<sub>11</sub></b>                |
| 234.1               | <b>FN-28</b>                                     | 458.2               | <b>TQDL</b>                                      | 687.3               | <b>DLuIS-H<sub>2</sub>O</b>                                   | 932.5 | <b>a<sub>7</sub></b>                | 1347.6 | <b>b<sub>11</sub>-H<sub>2</sub>O</b> |
| 240.1               | <b>ISG-H<sub>2</sub>O</b>                        | 459.2               | <b>ulS-H<sub>2</sub>O</b>                        | 690.8 <sup>+2</sup> | <b>y<sub>11</sub><sup>-</sup>-H<sub>2</sub>O<sup>+2</sup></b> | 934.4 | <b>TQDLul S</b>                     | 1348.6 | <b>b<sub>11</sub>-NH<sub>3</sub></b> |
| 244.1               | <b>QD</b>                                        | 462.2 <sup>+2</sup> | <b>y<sub>7</sub>-H<sub>2</sub>O<sup>+2</sup></b> | 691.3 <sup>+2</sup> | <b>y<sub>11</sub><sup>-</sup>-NH<sub>3</sub><sup>+2</sup></b> | 941.5 | <b>y<sub>7</sub></b>                | 1365.7 | <b>b<sub>11</sub></b>                |
| 244.1               | <b>y<sub>2</sub>-NH<sub>3</sub></b>              | 462.7 <sup>+2</sup> | <b>y<sub>7</sub>-NH<sub>3</sub><sup>+2</sup></b> | 699.8 <sup>+2</sup> | <b>y<sub>11</sub><sup>+2</sup></b>                            | 942.5 | <b>b<sub>7</sub>-H<sub>2</sub>O</b> | 1380.7 | <b>y<sub>11</sub>-H<sub>2</sub>O</b> |
| 245.1               | <b>FN-NH<sub>3</sub></b>                         | 465.2               | <b>y<sub>4</sub></b>                             | 705.3               | <b>DLuIS</b>                                                  | 943.5 | <b>b<sub>7</sub>-NH<sub>3</sub></b> | 1381.6 | <b>y<sub>11</sub>-NH<sub>3</sub></b> |
| 258.1               | <b>ISG</b>                                       | 471.2 <sup>+2</sup> | <b>y<sub>7</sub><sup>+2</sup></b>                | 706.3               | <b>TQDLu-28</b>                                               | 960.5 | <b>b<sub>7</sub></b>                | 1398.7 | <b>y<sub>11</sub></b>                |
| 261.2               | <b>y<sub>2</sub></b>                             | 475.3               | <b>Lul-28</b>                                    | 716.3               | <b>TQDLu-H<sub>2</sub>O</b>                                   | 963.5 | <b>TQDLul SG-28</b>                 | 1493.7 | <b>MH-H<sub>2</sub>O</b>             |
| 262.1               | <b>FN</b>                                        | 477.2               | <b>DLu-28</b>                                    | 717.3               | <b>TQDLu-NH<sub>3</sub></b>                                   | 973.4 | <b>TQDLul SG-H<sub>2</sub>O</b>     | 1494.7 | <b>MH-NH<sub>3</sub></b>             |
| 264.1               | <b>SGF-28</b>                                    | 477.2               | <b>ulS</b>                                       | 718.4               | <b>QDLul-28</b>                                               | 974.4 | <b>TQDLul SG-NH<sub>3</sub></b>     | 1511.8 | <b>MH</b>                            |
| 267.6 <sup>+2</sup> | <b>y<sub>5</sub>-H<sub>2</sub>O<sup>+2</sup></b> | 487.2               | <b>DLu-H<sub>2</sub>O</b>                        | 728.3               | <b>QDLul-H<sub>2</sub>O</b>                                   | 991.5 | <b>TQDLuISG</b>                     |        |                                      |

# LTQDLNISGFNK

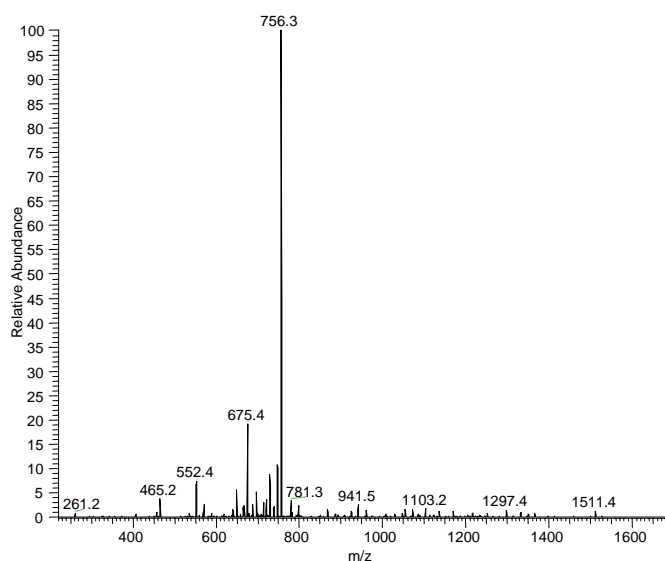

|                     |                                                  |                     |                                                  |                     |                                                  |       |                                     |        |                                     |
|---------------------|--------------------------------------------------|---------------------|--------------------------------------------------|---------------------|--------------------------------------------------|-------|-------------------------------------|--------|-------------------------------------|
| 60.0                | <b>S</b>                                         | 268.1 <sup>+2</sup> | <b>y<sub>5</sub>-NH<sub>3</sub><sup>+2</sup></b> | 552.2               | <b>Lv</b>                                        | 879.3 | <b>TQDLv-NH<sub>3</sub></b>         | 1157.5 | <b>DLvISG FN-28</b>                 |
| 65.6 <sup>+2</sup>  | <b>y<sub>1</sub>-NH<sub>3</sub><sup>+2</sup></b> | 274.1               | <b>SGF-H<sub>2</sub>O</b>                        | 552.3 <sup>+2</sup> | <b>y<sub>7</sub><sup>+2</sup></b>                | 880.4 | <b>QDLvi-28</b>                     | 1164.6 | <b>a<sub>8</sub>-NH<sub>3</sub></b> |
| 74.1                | <b>T</b>                                         | 276.6 <sup>+2</sup> | <b>y<sub>5</sub><sup>+2</sup></b>                | 552.3               | <b>y<sub>5</sub></b>                             | 890.4 | <b>QDLvi-H<sub>2</sub>O</b>         | 1167.5 | <b>DLvISG FN-H<sub>2</sub>O</b>     |
| 74.1 <sup>+2</sup>  | <b>y<sub>1</sub><sup>+2</sup></b>                | 291.1               | <b>GFN-28</b>                                    | 553.3               | <b>b<sub>5</sub>-H<sub>2</sub>O</b>              | 891.4 | <b>QDLvi-NH<sub>3</sub></b>         | 1168.5 | <b>DLvISG FN-NH<sub>3</sub></b>     |
| 84.1                | <b>Q</b>                                         | 292.1               | <b>SGF</b>                                       | 554.3               | <b>b<sub>5</sub>-NH<sub>3</sub></b>              | 896.4 | <b>TQDLv</b>                        | 1171.5 | <b>QDLviS GF-28</b>                 |
| 84.1                | <b>K</b>                                         | 298.2               | <b>a<sub>3</sub>-NH<sub>3</sub></b>              | 571.3               | <b>b<sub>5</sub></b>                             | 896.4 | <b>DLvISG-28</b>                    | 1181.5 | <b>QDLviS GF-H<sub>2</sub>O</b>     |
| 86.1                | <b>I</b>                                         | 302.1               | <b>GFN-NH<sub>3</sub></b>                        | 599.8 <sup>+2</sup> | <b>y<sub>8</sub>-H<sub>2</sub>O<sup>+2</sup></b> | 906.4 | <b>DLvISG-H<sub>2</sub>O</b>        | 1181.6 | <b>a<sub>8</sub></b>                |
| 86.1                | <b>L</b>                                         | 315.2               | <b>a<sub>3</sub></b>                             | 600.3 <sup>+2</sup> | <b>y<sub>8</sub>-NH<sub>3</sub><sup>+2</sup></b> | 908.4 | <b>QDLvi</b>                        | 1182.5 | <b>QDLviS GF-NH<sub>3</sub></b>     |
| 87.1                | <b>N</b>                                         | 317.1               | <b>TQD-28</b>                                    | 608.8 <sup>+2</sup> | <b>y<sub>8</sub><sup>+2</sup></b>                | 924.4 | <b>DLvISG</b>                       | 1185.5 | <b>DLvISG FN</b>                    |
| 88.0                | <b>D</b>                                         | 319.1               | <b>GFN</b>                                       | 611.3               | <b>viS-28</b>                                    | 928.5 | <b>LviSGF-28</b>                    | 1191.6 | <b>b<sub>8</sub>-H<sub>2</sub>O</b> |
| 101.1               | <b>Q</b>                                         | 324.2 <sup>+2</sup> | <b>y<sub>6</sub>-H<sub>2</sub>O<sup>+2</sup></b> | 621.3               | <b>viS-H<sub>2</sub>O</b>                        | 929.4 | <b>viSGFN-28</b>                    | 1192.5 | <b>b<sub>8</sub>-NH<sub>3</sub></b> |
| 101.1               | <b>K</b>                                         | 324.7 <sup>+2</sup> | <b>y<sub>6</sub>-NH<sub>3</sub><sup>+2</sup></b> | 637.3               | <b>Lvi-28</b>                                    | 938.4 | <b>LviSGF-H<sub>2</sub>O</b>        | 1198.6 | <b>y<sub>8</sub>-H<sub>2</sub>O</b> |
| 117.1               | <b>SG-28</b>                                     | 325.2               | <b>b<sub>3</sub>-H<sub>2</sub>O</b>              | 639.3               | <b>DLv-28</b>                                    | 939.4 | <b>viSGFN-H<sub>2</sub>O</b>        | 1199.5 | <b>QDLviS GF</b>                    |
| 120.1               | <b>F</b>                                         | 326.2               | <b>b<sub>3</sub>-NH<sub>3</sub></b>              | 639.3               | <b>viS</b>                                       | 940.4 | <b>viSGFN-NH<sub>3</sub></b>        | 1199.6 | <b>y<sub>8</sub>-NH<sub>3</sub></b> |
| 122.6 <sup>+2</sup> | <b>y<sub>2</sub>-NH<sub>3</sub><sup>+2</sup></b> | 327.1               | <b>TQD-H<sub>2</sub>O</b>                        | 647.4               | <b>y<sub>6</sub>-H<sub>2</sub>O</b>              | 956.4 | <b>LviSGF</b>                       | 1209.6 | <b>b<sub>8</sub></b>                |
| 126.1               | <b>K</b>                                         | 328.1               | <b>TQD-NH<sub>3</sub></b>                        | 648.3               | <b>y<sub>6</sub>-NH<sub>3</sub></b>              | 957.4 | <b>viSGFN</b>                       | 1216.6 | <b>y<sub>8</sub></b>                |
| 127.1               | <b>SG-H<sub>2</sub>O</b>                         | 329.2               | <b>QDL-28</b>                                    | 649.3               | <b>DLv-</b>                                      | 964.4 | <b>a<sub>6</sub>-NH<sub>3</sub></b> | 1221.6 | <b>a<sub>9</sub>-NH<sub>3</sub></b> |



|                     |                                                  |                     |                                     |                     |                                                               |        |                                     |        |                                      |
|---------------------|--------------------------------------------------|---------------------|-------------------------------------|---------------------|---------------------------------------------------------------|--------|-------------------------------------|--------|--------------------------------------|
|                     |                                                  |                     |                                     |                     | <b>H<sub>2</sub>O</b>                                         |        |                                     |        |                                      |
| 129.1               | <b>Q</b>                                         | 333.2 <sup>+2</sup> | <b>y<sub>6</sub><sup>+2</sup></b>   | 657.3 <sup>+2</sup> | <b>y<sub>9</sub>-H<sub>2</sub>O<sup>+2</sup></b>              | 967.4  | <b>QDLvIS-28</b>                    | 1238.6 | <b>a<sub>9</sub></b>                 |
| 129.1               | <b>K</b>                                         | 339.2               | <b>QDL-H<sub>2</sub>O</b>           | 657.8 <sup>+2</sup> | <b>y<sub>9</sub>-NH<sub>3</sub><sup>+2</sup></b>              | 977.4  | <b>QDLvIS-H<sub>2</sub>O</b>        | 1248.6 | <b>b<sub>9</sub>-H<sub>2</sub>O</b>  |
| 130.1               | <b>y<sub>1</sub>-NH<sub>3</sub></b>              | 340.2               | <b>QDL-NH<sub>3</sub></b>           | 665.3               | <b>Lvl</b>                                                    | 978.4  | <b>QDLvIS-NH<sub>3</sub></b>        | 1249.6 | <b>b<sub>9</sub>-NH<sub>3</sub></b>  |
| 131.1 <sup>+2</sup> | <b>y<sub>2</sub><sup>+2</sup></b>                | 343.2               | <b>b<sub>3</sub></b>                | 665.4               | <b>y<sub>6</sub></b>                                          | 981.5  | <b>TQDLvl-28</b>                    | 1266.6 | <b>b<sub>9</sub></b>                 |
| 145.1               | <b>SG</b>                                        | 345.1               | <b>TQD</b>                          | 666.3 <sup>+2</sup> | <b>y<sub>9</sub><sup>+2</sup></b>                             | 981.5  | <b>a<sub>6</sub></b>                | 1272.6 | <b>TQDLvl SGF-28</b>                 |
| 147.1               | <b>y<sub>1</sub></b>                             | 357.2               | <b>QDL</b>                          | 667.3               | <b>DLv</b>                                                    | 991.4  | <b>TQDLvl-H<sub>2</sub>O</b>        | 1282.6 | <b>TQDLvl SGF-H<sub>2</sub>O</b>     |
| 173.1               | <b>IS-28</b>                                     | 377.2               | <b>ISGF-28</b>                      | 668.3               | <b>vlSG-28</b>                                                | 991.4  | <b>b<sub>6</sub>-H<sub>2</sub>O</b> | 1283.6 | <b>TQDLvl SGF-NH<sub>3</sub></b>     |
| 177.1               | <b>GF-28</b>                                     | 378.2               | <b>SGFN-28</b>                      | 678.3               | <b>vlSG-H<sub>2</sub>O</b>                                    | 992.4  | <b>TQDLvl-NH<sub>3</sub></b>        | 1285.6 | <b>QDLvIS GFN-28</b>                 |
| 183.1               | <b>IS-H<sub>2</sub>O</b>                         | 387.2               | <b>ISGF-H<sub>2</sub>O</b>          | 696.3               | <b>vlSG</b>                                                   | 992.4  | <b>b<sub>6</sub>-NH<sub>3</sub></b> | 1295.6 | <b>QDLvIS GFN-H<sub>2</sub>O</b>     |
| 187.1               | <b>a<sub>2</sub></b>                             | 388.2               | <b>SGFN-H<sub>2</sub>O</b>          | 721.3 <sup>+2</sup> | <b>y<sub>10</sub><sup>-</sup>-H<sub>2</sub>O<sup>+2</sup></b> | 995.4  | <b>QDLvIS</b>                       | 1296.5 | <b>QDLvIS GFN-NH<sub>3</sub></b>     |
| 196.1 <sup>+2</sup> | <b>y<sub>3</sub>-NH<sub>3</sub><sup>+2</sup></b> | 389.1               | <b>SGFN-NH<sub>3</sub></b>          | 721.8 <sup>+2</sup> | <b>y<sub>10</sub><sup>-</sup>-NH<sub>3</sub><sup>+2</sup></b> | 1009.5 | <b>TQDLvl</b>                       | 1300.6 | <b>TQDLvl SGF</b>                    |
| 197.1               | <b>b<sub>2</sub>-H<sub>2</sub>O</b>              | 391.2               | <b>y<sub>3</sub>-NH<sub>3</sub></b> | 724.4               | <b>LvlS-28</b>                                                | 1009.5 | <b>b<sub>6</sub></b>                | 1313.6 | <b>QDLvIS GFN</b>                    |
| 201.1               | <b>IS</b>                                        | 405.2               | <b>ISGF</b>                         | 730.3 <sup>+2</sup> | <b>y<sub>10</sub><sup>+2</sup></b>                            | 1024.5 | <b>QDLvIS G-28</b>                  | 1313.6 | <b>y<sub>9</sub>-H<sub>2</sub>O</b>  |
| 201.1               | <b>DL-28</b>                                     | 406.2               | <b>SGFN</b>                         | 734.3               | <b>LvlS-H<sub>2</sub>O</b>                                    | 1034.5 | <b>QDLvIS G-H<sub>2</sub>O</b>      | 1314.6 | <b>y<sub>9</sub>-NH<sub>3</sub></b>  |
| 202.1               | <b>TQ-28</b>                                     | 408.2               | <b>y<sub>3</sub></b>                | 752.4               | <b>DLvl-28</b>                                                | 1035.4 | <b>QDLvIS G-NH<sub>3</sub></b>      | 1331.6 | <b>y<sub>9</sub></b>                 |
| 204.6 <sup>+2</sup> | <b>y<sub>3</sub><sup>+2</sup></b>                | 413.2               | <b>a<sub>4</sub>-NH<sub>3</sub></b> | 752.4               | <b>LvlS</b>                                                   | 1042.5 | <b>LvlISGF N-28</b>                 | 1368.6 | <b>a<sub>10</sub>-NH<sub>3</sub></b> |
| 205.1               | <b>GF</b>                                        | 430.2               | <b>a<sub>4</sub></b>                | 762.3               | <b>DLvl-H<sub>2</sub>O</b>                                    | 1043.5 | <b>DLvlISG F-28</b>                 | 1385.7 | <b>a<sub>10</sub></b>                |
| 211.1               | <b>DL-H<sub>2</sub>O</b>                         | 430.2               | <b>TQDL-28</b>                      | 767.3               | <b>QDLv-28</b>                                                | 1052.5 | <b>QDLvIS G</b>                     | 1386.6 | <b>TQDLvl SGFN-28</b>                |
| 212.1               | <b>TQ-H<sub>2</sub>O</b>                         | 440.2               | <b>TQDL-H<sub>2</sub>O</b>          | 771.9 <sup>+2</sup> | <b>y<sub>11</sub><sup>-</sup>-H<sub>2</sub>O<sup>+2</sup></b> | 1052.5 | <b>LvlISGF N-H<sub>2</sub>O</b>     | 1395.7 | <b>b<sub>10</sub>-H<sub>2</sub>O</b> |
| 213.1               | <b>TQ-NH<sub>3</sub></b>                         | 440.2               | <b>b<sub>4</sub>-H<sub>2</sub>O</b> | 772.4 <sup>+2</sup> | <b>y<sub>11</sub><sup>-</sup>-NH<sub>3</sub><sup>+2</sup></b> | 1053.5 | <b>LvlISGF N-NH<sub>3</sub></b>     | 1396.6 | <b>TQDLvl SGFN-H<sub>2</sub>O</b>    |
| 215.1               | <b>b<sub>2</sub></b>                             | 441.2               | <b>TQDL-NH<sub>3</sub></b>          | 777.3               | <b>QDLv-H<sub>2</sub>O</b>                                    | 1053.5 | <b>DLvlISG F-H<sub>2</sub>O</b>     | 1396.6 | <b>b<sub>10</sub>-NH<sub>3</sub></b> |
| 216.1               | <b>QD-28</b>                                     | 441.2               | <b>b<sub>4</sub>-NH<sub>3</sub></b> | 778.3               | <b>QDLv-NH<sub>3</sub></b>                                    | 1068.5 | <b>TQDLvl S-28</b>                  | 1397.6 | <b>TQDLvl SGFN-NH<sub>3</sub></b>    |
| 224.6 <sup>+2</sup> | <b>y<sub>4</sub>-NH<sub>3</sub><sup>+2</sup></b> | 448.2               | <b>y<sub>4</sub>-NH<sub>3</sub></b> | 780.4               | <b>DLvl</b>                                                   | 1070.5 | <b>LvlISGF N</b>                    | 1413.7 | <b>b<sub>10</sub></b>                |
| 226.1               | <b>QD-H<sub>2</sub>O</b>                         | 458.2               | <b>TQDL</b>                         | 780.9 <sup>+2</sup> | <b>y<sub>11</sub><sup>+2</sup></b>                            | 1071.5 | <b>DLvlISG F</b>                    | 1414.6 | <b>TQDLvl SGFN</b>                   |

|                     |                                                  |                     |                                                  |                     |                                       |        |                                     |        |                                      |
|---------------------|--------------------------------------------------|---------------------|--------------------------------------------------|---------------------|---------------------------------------|--------|-------------------------------------|--------|--------------------------------------|
| 227.1               | <b>QD-NH<sub>3</sub></b>                         | 458.2               | <b>b<sub>4</sub></b>                             | 781.4               | <b>LvISG-28</b>                       | 1077.5 | <b>a<sub>7</sub>-NH<sub>3</sub></b> | 1441.7 | <b>y<sub>10</sub>-H<sub>2</sub>O</b> |
| 229.1               | <b>DL</b>                                        | 465.2               | <b>y<sub>4</sub></b>                             | 791.4               | <b>LvISG-H<sub>2</sub>O</b>           | 1078.5 | <b>TQDLvI S-H<sub>2</sub>O</b>      | 1442.7 | <b>y<sub>10</sub>-NH<sub>3</sub></b> |
| 230.1               | <b>TQ</b>                                        | 491.3               | <b>ISGFN-28</b>                                  | 795.3               | <b>QDLv</b>                           | 1079.5 | <b>TQDLvI S-NH<sub>3</sub></b>      | 1459.7 | <b>y<sub>10</sub></b>                |
| 230.1               | <b>ISG-28</b>                                    | 501.2               | <b>ISGFN-H<sub>2</sub>O</b>                      | 809.4               | <b>LvISG</b>                          | 1085.5 | <b>y<sub>7</sub>-H<sub>2</sub>O</b> | 1482.7 | <b>a<sub>11</sub>-NH<sub>3</sub></b> |
| 233.1 <sup>+2</sup> | <b>y<sub>4</sub><sup>+2</sup></b>                | 502.2               | <b>ISGFN-NH<sub>3</sub></b>                      | 815.4               | <b>vlISGF-28</b>                      | 1086.5 | <b>y<sub>7</sub>-NH<sub>3</sub></b> | 1499.7 | <b>a<sub>11</sub></b>                |
| 234.1               | <b>FN-28</b>                                     | 519.3               | <b>ISGFN</b>                                     | 825.4               | <b>vlISGF-H<sub>2</sub>O</b>          | 1094.5 | <b>a<sub>7</sub></b>                | 1509.7 | <b>b<sub>11</sub>-H<sub>2</sub>O</b> |
| 240.1               | <b>ISG-H<sub>2</sub>O</b>                        | 524.2               | <b>vl-28</b>                                     | 828.4 <sup>+2</sup> | <b>MH-H<sub>2</sub>O<sup>+2</sup></b> | 1096.5 | <b>TQDLvI S</b>                     | 1510.7 | <b>b<sub>11</sub>-NH<sub>3</sub></b> |
| 244.1               | <b>QD</b>                                        | 524.2               | <b>Lv-28</b>                                     | 828.9 <sup>+2</sup> | <b>MH-NH<sub>3</sub><sup>+2</sup></b> | 1103.5 | <b>y<sub>7</sub></b>                | 1527.7 | <b>b<sub>11</sub></b>                |
| 244.1               | <b>y<sub>2</sub>-NH<sub>3</sub></b>              | 526.3               | <b>a<sub>5</sub>-NH<sub>3</sub></b>              | 837.4 <sup>+2</sup> | <b>MH<sup>+2</sup></b>                | 1104.5 | <b>b<sub>7</sub>-H<sub>2</sub>O</b> | 1542.7 | <b>y<sub>11</sub>-H<sub>2</sub>O</b> |
| 245.1               | <b>FN-NH<sub>3</sub></b>                         | 534.3               | <b>y<sub>5</sub>-H<sub>2</sub>O</b>              | 839.4               | <b>DLvIS-28</b>                       | 1105.5 | <b>b<sub>7</sub>-NH<sub>3</sub></b> | 1543.7 | <b>y<sub>11</sub>-NH<sub>3</sub></b> |
| 258.1               | <b>ISG</b>                                       | 535.3               | <b>y<sub>5</sub>-NH<sub>3</sub></b>              | 843.4               | <b>vlISGF</b>                         | 1122.5 | <b>b<sub>7</sub></b>                | 1560.7 | <b>y<sub>11</sub></b>                |
| 261.2               | <b>y<sub>2</sub></b>                             | 543.3 <sup>+2</sup> | <b>y<sub>7</sub>-H<sub>2</sub>O<sup>+2</sup></b> | 849.4               | <b>DLvIS-H<sub>2</sub>O</b>           | 1125.5 | <b>TQDLvI SG-28</b>                 | 1655.8 | <b>MH-H<sub>2</sub>O</b>             |
| 262.1               | <b>FN</b>                                        | 543.3               | <b>a<sub>5</sub></b>                             | 867.4               | <b>DLvIS</b>                          | 1135.5 | <b>TQDLvI SG-H<sub>2</sub>O</b>     | 1656.8 | <b>MH-NH<sub>3</sub></b>             |
| 264.1               | <b>SGF-28</b>                                    | 543.8 <sup>+2</sup> | <b>y<sub>7</sub>-NH<sub>3</sub><sup>+2</sup></b> | 868.4               | <b>TQDLv-28</b>                       | 1136.5 | <b>TQDLvI SG-NH<sub>3</sub></b>     | 1673.8 | <b>MH</b>                            |
| 267.6 <sup>+2</sup> | <b>y<sub>5</sub>-H<sub>2</sub>O<sup>+2</sup></b> | 552.2               | <b>vl</b>                                        | 878.4               | <b>TQDLv-H<sub>2</sub>O</b>           | 1153.5 | <b>TQDLvISG</b>                     |        |                                      |

## NVTVNNITSHK

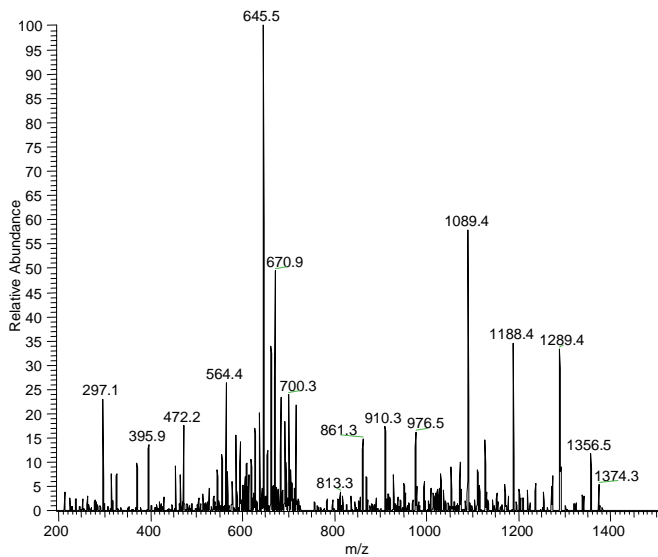

|                    |                                                  |                     |                                                  |                     |                                                               |                     |                                                               |       |                                     |
|--------------------|--------------------------------------------------|---------------------|--------------------------------------------------|---------------------|---------------------------------------------------------------|---------------------|---------------------------------------------------------------|-------|-------------------------------------|
| 60.0               | <b>S</b>                                         | 282.2               | <b>VTV-H<sub>2</sub>O</b>                        | 457.9 <sup>+3</sup> | <b>y<sub>11</sub><sup>-</sup>-NH<sub>3</sub><sup>+3</sup></b> | 678.8 <sup>+2</sup> | <b>b<sub>11</sub><sup>+2</sup></b>                            | 943.4 | <b>NNuITS H</b>                     |
| 65.6 <sup>+2</sup> | <b>y<sub>1</sub>-NH<sub>3</sub><sup>+2</sup></b> | 284.2               | <b>ITS-H<sub>2</sub>O</b>                        | 463.2               | <b>uIT-28</b>                                                 | 685.8 <sup>+2</sup> | <b>y<sub>11</sub><sup>-</sup>-H<sub>2</sub>O<sup>+2</sup></b> | 957.5 | <b>y<sub>7</sub>-H<sub>2</sub>O</b> |
| 72.1               | <b>V</b>                                         | 284.2 <sup>+2</sup> | <b>y<sub>5</sub>-H<sub>2</sub>O<sup>+2</sup></b> | 463.6 <sup>+3</sup> | <b>y<sub>11</sub><sup>+3</sup></b>                            | 686.3 <sup>+2</sup> | <b>y<sub>11</sub><sup>-</sup></b>                             | 958.4 | <b>y<sub>7</sub>-NH<sub>3</sub></b> |

|              |                               |              |                                |              |                                  |              |                                   |        |                                           |
|--------------|-------------------------------|--------------|--------------------------------|--------------|----------------------------------|--------------|-----------------------------------|--------|-------------------------------------------|
|              |                               |              |                                |              |                                  |              | $\text{NH}_3^{+2}$                |        |                                           |
| 74.1         | <b>T</b>                      | 284.2        | $y_2$                          | 472.3        | $y_4$                            | 687.3        | <b>TVNNU-<br/>H<sub>2</sub>O</b>  | 975.5  | $y_7$                                     |
| $74.1^{+2}$  | $y_1^{+2}$                    | $284.7^{+2}$ | $y_5\text{-NH}_3^{+2}$         | 473.2        | <b>uIT-H<sub>2</sub>O</b>        | 687.3        | <b>uITSH-<br/>28</b>              | 978.5  | <b>TVNNuI<br/>TS-28</b>                   |
| 84.1         | <b>K</b>                      | 287.2        | <b>TVN-28</b>                  | 476.2        | <b>NuI-28</b>                    | $687.8^{+2}$ | $b_{11}+\text{H}_2\text{O}^{+2}$  | 986.5  | $a_8\text{-NH}_3$                         |
| 86.1         | <b>I</b>                      | 287.2        | $a_3$                          | 477.2        | <b>NNu-28</b>                    | 688.3        | <b>TVNNU-<br/>NH<sub>3</sub></b>  | 988.5  | <b>TVNNuI<br/>TS-H<sub>2</sub>O</b>       |
| 87.1         | <b>N</b>                      | $287.8^{+3}$ | $y_6^{+3}$                     | $479.2^{+2}$ | $y_7\text{-H}_2\text{O}^{+2}$    | 689.3        | <b>VNNuI-<br/>28</b>              | 989.4  | <b>TVNNuI<br/>TS-NH<sub>3</sub></b>       |
| $89.7^{+3}$  | $y_2\text{-NH}_3^{+3}$        | $293.2^{+2}$ | $y_5^{+2}$                     | $479.7^{+2}$ | $y_7\text{-NH}_3^{+2}$           | 691.3        | <b>NNuIT-<br/>28</b>              | 990.5  | <b>VTVNN<br/>uIT-28</b>                   |
| $95.4^{+3}$  | $y_2^{+3}$                    | 297.2        | <b>TVN-<br/>H<sub>2</sub>O</b> | 483.3        | $a_5\text{-NH}_3$                | 692.3        | <b>NuITS</b>                      | 1000.5 | <b>VTVNN<br/>uIT-H<sub>2</sub>O</b>       |
| 101.1        | <b>K</b>                      | 297.2        | $b_3\text{-H}_2\text{O}$       | 487.2        | <b>NuI-NH<sub>3</sub></b>        | $694.9^{+2}$ | $y_{11}^{+2}$                     | 1001.5 | <b>VTVNN<br/>uIT-NH<sub>3</sub></b>       |
| 110.1        | <b>H</b>                      | 298.1        | <b>TVN-<br/>NH<sub>3</sub></b> | 488.2        | <b>NNu-<br/>NH<sub>3</sub></b>   | 697.3        | <b>uITSH-<br/>H<sub>2</sub>O</b>  | 1003.5 | $a_8$                                     |
| $118.4^{+3}$ | $y_3\text{-H}_2\text{O}^{+3}$ | 298.1        | $b_3\text{-NH}_3$              | $488.2^{+2}$ | $y_7^{+2}$                       | 700.3        | <b>VNNuI-<br/>NH<sub>3</sub></b>  | 1006.5 | <b>TVNNuI<br/>TS</b>                      |
| $118.7^{+3}$ | $y_3\text{-NH}_3^{+3}$        | 298.2        | <b>TSH-28</b>                  | 491.2        | <b>uIT</b>                       | 701.3        | <b>NNuIT-<br/>H<sub>2</sub>O</b>  | 1013.5 | $b_8\text{-H}_2\text{O}$                  |
| $124.4^{+3}$ | $y_3^{+3}$                    | 300.2        | <b>VNN-28</b>                  | $495.6^{+3}$ | $\text{MH-H}_2\text{O}^{+3}$     | 702.3        | <b>NNuIT-<br/>NH<sub>3</sub></b>  | 1014.5 | $b_8\text{-NH}_3$                         |
| 126.1        | <b>K</b>                      | 300.2        | <b>VTV</b>                     | $495.9^{+3}$ | $\text{MH-NH}_3^{+3}$            | 705.3        | <b>TVNNU</b>                      | 1014.5 | <b>VNNuIT<br/>SH-28</b>                   |
| 129.1        | <b>K</b>                      | 302.2        | <b>ITS</b>                     | 500.3        | $a_5$                            | 715.3        | <b>uITSH</b>                      | 1018.5 | <b>VTVNN<br/>uIT</b>                      |
| 130.1        | $y_1\text{-NH}_3$             | 308.1        | <b>TSH-<br/>H<sub>2</sub>O</b> | 500.3        | <b>VTVNN-<br/>28</b>             | 717.3        | <b>VNNuI</b>                      | 1024.5 | <b>VNNuIT<br/>SH-H<sub>2</sub>O</b>       |
| $134.1^{+2}$ | $y_2\text{-NH}_3^{+2}$        | 311.1        | <b>VNN-<br/>NH<sub>3</sub></b> | $501.6^{+3}$ | $\text{MH}^{+3}$                 | 719.3        | <b>NNuIT</b>                      | 1025.5 | <b>VNNuIT<br/>SH-NH<sub>3</sub></b>       |
| 138.1        | <b>H</b>                      | 315.2        | <b>TVN</b>                     | 504.2        | <b>NuI</b>                       | $742.9^{+2}$ | $\text{MH-H}_2\text{O}^{+2}$      | 1031.5 | $b_8$                                     |
| $142.6^{+2}$ | $y_2^{+2}$                    | 315.2        | $b_3$                          | 505.2        | <b>NNu</b>                       | $743.4^{+2}$ | $\text{MH-NH}_3^{+2}$             | 1042.5 | <b>VNNuIT<br/>SH</b>                      |
| 147.1        | $y_1$                         | $319.8^{+3}$ | $y_7\text{-H}_2\text{O}^{+3}$  | 510.3        | $b_5\text{-H}_2\text{O}$         | $751.9^{+2}$ | $\text{MH}^{+2}$                  | 1071.5 | $y_8\text{-H}_2\text{O}$                  |
| $152.1^{+3}$ | $y_4\text{-H}_2\text{O}^{+3}$ | $320.2^{+3}$ | $y_7\text{-NH}_3^{+3}$         | 510.3        | <b>VTVNN-<br/>H<sub>2</sub>O</b> | 776.4        | <b>VTVNN<br/>u-28</b>             | 1072.5 | $y_8\text{-NH}_3$                         |
| $152.4^{+3}$ | $y_4\text{-NH}_3^{+3}$        | $325.8^{+3}$ | $y_7^{+3}$                     | 511.3        | <b>VTVNN-<br/>NH<sub>3</sub></b> | 778.4        | <b>NNuITS-<br/>28</b>             | 1077.5 | <b>VTVNN<br/>uITS-28</b>                  |
| $158.1^{+3}$ | $y_4^{+3}$                    | 326.1        | <b>TSH</b>                     | 511.3        | $b_5\text{-NH}_3$                | 786.4        | <b>VTVNN<br/>u-H<sub>2</sub>O</b> | 1087.5 | <b>VTVNN<br/>uITS-<br/>H<sub>2</sub>O</b> |
| 161.1        | <b>TS-28</b>                  | 328.2        | <b>VNN</b>                     | 528.3        | <b>VTVNN</b>                     | 787.3        | <b>VTVNN<br/>u-NH<sub>3</sub></b> | 1087.5 | $a_9\text{-NH}_3$                         |
| 169.1        | $a_2\text{-NH}_3$             | 353.2        | $y_3\text{-H}_2\text{O}$       | 528.3        | $b_5$                            | 788.3        | <b>NNuITS-<br/>H<sub>2</sub>O</b> | 1088.5 | <b>VTVNN<br/>uITS-<br/>NH<sub>3</sub></b> |
| 171.1        | <b>TS-H<sub>2</sub>O</b>      | 354.2        | $y_3\text{-NH}_3$              | $536.3^{+2}$ | $y_8\text{-H}_2\text{O}^{+2}$    | 789.3        | <b>NNuITS-<br/>NH<sub>3</sub></b> | 1089.5 | $y_8$                                     |

|                     |                                                  |                     |                                                  |                     |                                                   |       |                                     |        |                                      |
|---------------------|--------------------------------------------------|---------------------|--------------------------------------------------|---------------------|---------------------------------------------------|-------|-------------------------------------|--------|--------------------------------------|
| 173.1               | <b>VT-28</b>                                     | 357.8 <sup>+3</sup> | <b>y<sub>8</sub>-H<sub>2</sub>O<sup>+3</sup></b> | 536.8 <sup>+2</sup> | <b>y<sub>8</sub>-NH<sub>3</sub><sup>+2</sup></b>  | 790.4 | <b>VNNuIT-28</b>                    | 1104.6 | <b>a<sub>9</sub></b>                 |
| 173.1               | <b>TV-28</b>                                     | 358.2 <sup>+3</sup> | <b>y<sub>8</sub>-NH<sub>3</sub><sup>+3</sup></b> | 545.3 <sup>+2</sup> | <b>y<sub>8</sub><sup>+2</sup></b>                 | 790.4 | <b>TVNNuI-28</b>                    | 1105.5 | <b>VTVNN uITS</b>                    |
| 177.1 <sup>+2</sup> | <b>y<sub>3</sub>-H<sub>2</sub>O<sup>+2</sup></b> | 362.2               | <b>ul-28</b>                                     | 550.3               | <b>uITS-28</b>                                    | 800.4 | <b>VNNuIT-H<sub>2</sub>O</b>        | 1114.5 | <b>b<sub>9</sub>-H<sub>2</sub>O</b>  |
| 177.6 <sup>+2</sup> | <b>y<sub>3</sub>-NH<sub>3</sub><sup>+2</sup></b> | 363.2               | <b>Nu-28</b>                                     | 560.3               | <b>uITS-H<sub>2</sub>O</b>                        | 800.4 | <b>TVNNuI-H<sub>2</sub>O</b>        | 1115.5 | <b>b<sub>9</sub>-NH<sub>3</sub></b>  |
| 183.1               | <b>TV-H<sub>2</sub>O</b>                         | 363.8 <sup>+3</sup> | <b>y<sub>8</sub><sup>+3</sup></b>                | 567.3               | <b>y<sub>5</sub>-H<sub>2</sub>O</b>               | 801.4 | <b>VNNuIT-NH<sub>3</sub></b>        | 1115.5 | <b>TVNNuI TSH-28</b>                 |
| 183.1               | <b>VT-H<sub>2</sub>O</b>                         | 369.2               | <b>a<sub>4</sub>-NH<sub>3</sub></b>              | 568.3               | <b>y<sub>5</sub>-NH<sub>3</sub></b>               | 801.4 | <b>TVNNuI-NH<sub>3</sub></b>        | 1125.5 | <b>TVNNuI TSH-H<sub>2</sub>O</b>     |
| 186.1 <sup>+2</sup> | <b>y<sub>3</sub><sup>+2</sup></b>                | 371.2               | <b>y<sub>3</sub></b>                             | 576.3               | <b>VNNu-28</b>                                    | 801.4 | <b>NuITSH-28</b>                    | 1126.5 | <b>TVNNuI TSH-NH<sub>3</sub></b>     |
| 186.1               | <b>a<sub>2</sub></b>                             | 374.1               | <b>Nu-NH<sub>3</sub></b>                         | 577.3               | <b>NuIT-28</b>                                    | 804.4 | <b>VTVNN u</b>                      | 1132.5 | <b>b<sub>9</sub></b>                 |
| 186.1               | <b>VN-28</b>                                     | 386.2               | <b>VTVN-28</b>                                   | 578.3               | <b>uITS</b>                                       | 806.4 | <b>NNuITS</b>                       | 1143.5 | <b>TVNNuI TSH</b>                    |
| 187.1               | <b>IT-28</b>                                     | 386.2               | <b>a<sub>4</sub></b>                             | 585.3               | <b>y<sub>5</sub></b>                              | 811.4 | <b>NuITSH-H<sub>2</sub>O</b>        | 1170.6 | <b>y<sub>9</sub>-H<sub>2</sub>O</b>  |
| 189.1               | <b>TS</b>                                        | 390.2               | <b>ul</b>                                        | 585.8 <sup>+2</sup> | <b>y<sub>9</sub>-H<sub>2</sub>O<sup>+2</sup></b>  | 812.3 | <b>NuITSH-NH<sub>3</sub></b>        | 1171.6 | <b>y<sub>9</sub>-NH<sub>3</sub></b>  |
| 189.8 <sup>+3</sup> | <b>y<sub>5</sub>-H<sub>2</sub>O<sup>+3</sup></b> | 390.9 <sup>+3</sup> | <b>y<sub>9</sub>-H<sub>2</sub>O<sup>+3</sup></b> | 586.3 <sup>+2</sup> | <b>y<sub>9</sub>-NH<sub>3</sub><sup>+2</sup></b>  | 818.4 | <b>VNNuIT</b>                       | 1174.6 | <b>a<sub>10</sub>-NH<sub>3</sub></b> |
| 190.1 <sup>+3</sup> | <b>y<sub>5</sub>-NH<sub>3</sub><sup>+3</sup></b> | 391.1               | <b>Nu</b>                                        | 587.2               | <b>VNNu-NH<sub>3</sub></b>                        | 818.4 | <b>TVNNuI</b>                       | 1188.6 | <b>y<sub>9</sub></b>                 |
| 195.8 <sup>+3</sup> | <b>y<sub>5</sub><sup>+3</sup></b>                | 391.2 <sup>+3</sup> | <b>y<sub>9</sub>-NH<sub>3</sub><sup>+3</sup></b> | 587.3               | <b>NuIT-H<sub>2</sub>O</b>                        | 829.4 | <b>NuITSH</b>                       | 1191.6 | <b>a<sub>10</sub></b>                |
| 197.1               | <b>VN-NH<sub>3</sub></b>                         | 396.2               | <b>VTVN-H<sub>2</sub>O</b>                       | 588.3               | <b>NuIT-NH<sub>3</sub></b>                        | 843.4 | <b>y<sub>6</sub>-H<sub>2</sub>O</b> | 1201.6 | <b>b<sub>10</sub>-H<sub>2</sub>O</b> |
| 197.1               | <b>b<sub>2</sub>-NH<sub>3</sub></b>              | 396.2               | <b>b<sub>4</sub>-H<sub>2</sub>O</b>              | 590.3               | <b>NNuI-28</b>                                    | 844.4 | <b>y<sub>6</sub>-NH<sub>3</sub></b> | 1202.6 | <b>b<sub>10</sub>-NH<sub>3</sub></b> |
| 197.1               | <b>SH-28</b>                                     | 396.9 <sup>+3</sup> | <b>y<sub>9</sub><sup>+3</sup></b>                | 594.8 <sup>+2</sup> | <b>y<sub>9</sub><sup>+2</sup></b>                 | 861.4 | <b>y<sub>6</sub></b>                | 1214.6 | <b>VTVNN uITSH-28</b>                |
| 197.1               | <b>IT-H<sub>2</sub>O</b>                         | 397.2               | <b>VTVN-NH<sub>3</sub></b>                       | 597.3               | <b>a<sub>6</sub>-NH<sub>3</sub></b>               | 873.4 | <b>a<sub>7</sub>-NH<sub>3</sub></b> | 1219.6 | <b>b<sub>10</sub></b>                |
| 201.1               | <b>NN-28</b>                                     | 397.2               | <b>b<sub>4</sub>-NH<sub>3</sub></b>              | 601.2               | <b>NNuI-NH<sub>3</sub></b>                        | 877.4 | <b>VNNuIT S-28</b>                  | 1224.6 | <b>VTVNN uITSH-H<sub>2</sub>O</b>    |
| 201.1               | <b>VT</b>                                        | 401.2               | <b>TVNN-28</b>                                   | 604.3               | <b>VNNu</b>                                       | 887.4 | <b>VNNuIT S-H<sub>2</sub>O</b>      | 1225.6 | <b>VTVNN uITSH-NH<sub>3</sub></b>    |
| 201.1               | <b>TV</b>                                        | 411.2               | <b>TVNN-H<sub>2</sub>O</b>                       | 605.3               | <b>NuIT</b>                                       | 888.4 | <b>VNNuIT S-NH<sub>3</sub></b>      | 1242.6 | <b>VTVNN uITSH</b>                   |
| 207.1               | <b>SH-H<sub>2</sub>O</b>                         | 411.2               | <b>ITSH-28</b>                                   | 614.3               | <b>a<sub>6</sub></b>                              | 889.5 | <b>VTVNN ul-28</b>                  | 1271.6 | <b>y<sub>10</sub>-H<sub>2</sub>O</b> |
| 212.1               | <b>NN-NH<sub>3</sub></b>                         | 412.2               | <b>TVNN-NH<sub>3</sub></b>                       | 618.3               | <b>NNuI</b>                                       | 890.4 | <b>a<sub>7</sub></b>                | 1272.6 | <b>y<sub>10</sub>-NH<sub>3</sub></b> |
| 214.1               | <b>b<sub>2</sub></b>                             | 414.2               | <b>VTVN</b>                                      | 624.3               | <b>b<sub>6</sub>-H<sub>2</sub>O</b>               | 891.4 | <b>TVNNuI T-28</b>                  | 1289.6 | <b>y<sub>10</sub></b>                |
| 214.1               | <b>VN</b>                                        | 414.2               | <b>b<sub>4</sub></b>                             | 625.3               | <b>b<sub>6</sub>-NH<sub>3</sub></b>               | 899.4 | <b>VTVNN ul-H<sub>2</sub>O</b>      | 1311.6 | <b>a<sub>11</sub>-NH<sub>3</sub></b> |
| 215.1               | <b>IT</b>                                        | 421.2               | <b>ITSH-H<sub>2</sub>O</b>                       | 636.3 <sup>+2</sup> | <b>y<sub>10</sub>-H<sub>2</sub>O<sup>+2</sup></b> | 900.4 | <b>b<sub>7</sub>-H<sub>2</sub>O</b> | 1328.6 | <b>a<sub>11</sub></b>                |

|                     |                                                  |                     |                                                               |                     |                                                               |       |                                     |        |                                      |
|---------------------|--------------------------------------------------|---------------------|---------------------------------------------------------------|---------------------|---------------------------------------------------------------|-------|-------------------------------------|--------|--------------------------------------|
| 225.1               | <b>SH</b>                                        | 422.2 <sup>+2</sup> | <b>y<sub>6</sub>-H<sub>2</sub>O<sup>+2</sup></b>              | 636.8 <sup>+2</sup> | <b>y<sub>10</sub><sup>-</sup>-NH<sub>3</sub><sup>+2</sup></b> | 900.4 | <b>VTVNNul-NH<sub>3</sub></b>       | 1338.6 | <b>b<sub>11</sub>-H<sub>2</sub>O</b> |
| 227.6 <sup>+2</sup> | <b>y<sub>4</sub>-H<sub>2</sub>O<sup>+2</sup></b> | 422.7 <sup>+2</sup> | <b>y<sub>6</sub>-NH<sub>3</sub><sup>+2</sup></b>              | 642.3               | <b>b<sub>6</sub></b>                                          | 901.4 | <b>b<sub>7</sub>-NH<sub>3</sub></b> | 1339.6 | <b>b<sub>11</sub>-NH<sub>3</sub></b> |
| 228.1 <sup>+2</sup> | <b>y<sub>4</sub>-NH<sub>3</sub><sup>+2</sup></b> | 424.6 <sup>+3</sup> | <b>y<sub>10</sub><sup>-</sup>-H<sub>2</sub>O<sup>+3</sup></b> | 645.3 <sup>+2</sup> | <b>y<sub>10</sub><sup>+2</sup></b>                            | 901.4 | <b>TVNNulT-H<sub>2</sub>O</b>       | 1356.6 | <b>b<sub>11</sub></b>                |
| 229.1               | <b>NN</b>                                        | 424.9 <sup>+3</sup> | <b>y<sub>10</sub><sup>-</sup>-NH<sub>3</sub><sup>+3</sup></b> | 656.3 <sup>+2</sup> | <b>a<sub>11</sub><sup>-</sup>-NH<sub>3</sub><sup>+2</sup></b> | 902.4 | <b>TVNNulT-NH<sub>3</sub></b>       | 1370.7 | <b>y<sub>11</sub>-H<sub>2</sub>O</b> |
| 236.6 <sup>+2</sup> | <b>y<sub>4</sub><sup>+2</sup></b>                | 429.2               | <b>TVNN</b>                                                   | 664.3               | <b>NuITS-28</b>                                               | 905.4 | <b>VNNulTS</b>                      | 1371.7 | <b>y<sub>11</sub>-NH<sub>3</sub></b> |
| 267.1               | <b>y<sub>2</sub>-NH<sub>3</sub></b>              | 430.6 <sup>+3</sup> | <b>y<sub>10</sub><sup>+3</sup></b>                            | 664.8 <sup>+2</sup> | <b>a<sub>11</sub><sup>+2</sup></b>                            | 915.4 | <b>NNuITS H-28</b>                  | 1374.6 | <b>b<sub>11</sub>+H<sub>2</sub>O</b> |
| 270.1               | <b>a<sub>3</sub>-NH<sub>3</sub></b>              | 431.2 <sup>+2</sup> | <b>y<sub>6</sub><sup>+2</sup></b>                             | 669.8 <sup>+2</sup> | <b>b<sub>11</sub><sup>-</sup>-H<sub>2</sub>O<sup>+2</sup></b> | 917.5 | <b>VTVNNul</b>                      | 1388.7 | <b>y<sub>11</sub></b>                |
| 272.2               | <b>VTV-28</b>                                    | 439.2               | <b>ITSH</b>                                                   | 670.3 <sup>+2</sup> | <b>b<sub>11</sub><sup>-</sup>-NH<sub>3</sub><sup>+2</sup></b> | 918.4 | <b>b<sub>7</sub></b>                | 1484.7 | <b>MH-H<sub>2</sub>O</b>             |
| 274.2               | <b>ITS-28</b>                                    | 454.2               | <b>y<sub>4</sub>-H<sub>2</sub>O</b>                           | 674.3               | <b>NuITS-H<sub>2</sub>O</b>                                   | 919.4 | <b>TVNNulT</b>                      | 1485.7 | <b>MH-NH<sub>3</sub></b>             |
| 281.8 <sup>+3</sup> | <b>y<sub>6</sub>-H<sub>2</sub>O<sup>+3</sup></b> | 455.2               | <b>y<sub>4</sub>-NH<sub>3</sub></b>                           | 675.3               | <b>NuITS-NH<sub>3</sub></b>                                   | 925.4 | <b>NNuITS H-H<sub>2</sub>O</b>      | 1502.7 | <b>MH</b>                            |
| 282.1 <sup>+3</sup> | <b>y<sub>6</sub>-NH<sub>3</sub><sup>+3</sup></b> | 457.6 <sup>+3</sup> | <b>y<sub>11</sub><sup>-</sup>-H<sub>2</sub>O<sup>+3</sup></b> | 677.3               | <b>TVNNu-28</b>                                               | 926.4 | <b>NNuITSH-NH<sub>3</sub></b>       |        |                                      |

## NVTVNNNITSHK

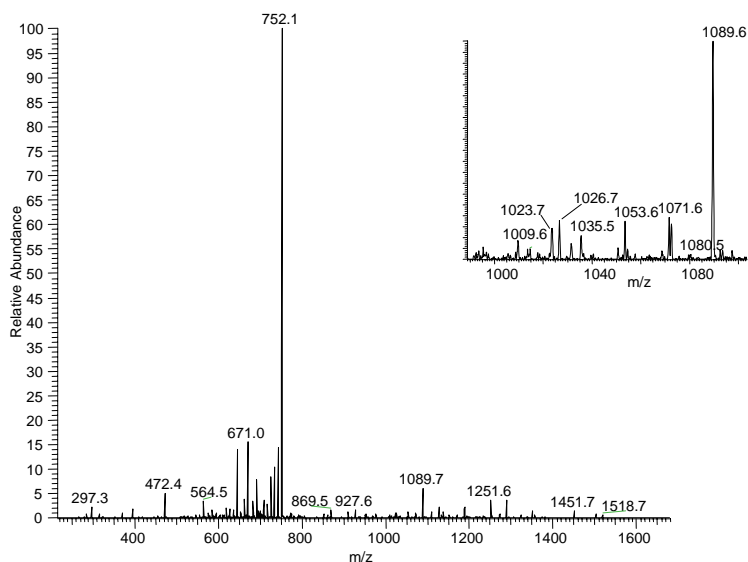

|                    |                                                  |                     |                                                  |                     |                                                               |                     |                                       |        |                                     |
|--------------------|--------------------------------------------------|---------------------|--------------------------------------------------|---------------------|---------------------------------------------------------------|---------------------|---------------------------------------|--------|-------------------------------------|
| 60.0               | <b>S</b>                                         | 284.2 <sup>+2</sup> | <b>y<sub>5</sub>-H<sub>2</sub>O<sup>+2</sup></b> | 511.3               | <b>VTVNN-NH<sub>3</sub></b>                                   | 780.3               | <b>NNvi</b>                           | 1105.5 | <b>NNviTSH</b>                      |
| 65.6 <sup>+2</sup> | <b>y<sub>1</sub>-NH<sub>3</sub><sup>+2</sup></b> | 284.2               | <b>y<sub>2</sub></b>                             | 511.6 <sup>+3</sup> | <b>y<sub>11</sub><sup>-</sup>-H<sub>2</sub>O<sup>+3</sup></b> | 823.9 <sup>+2</sup> | <b>MH-H<sub>2</sub>O<sup>+2</sup></b> | 1119.5 | <b>y<sub>7</sub>-H<sub>2</sub>O</b> |
| 72.1               | <b>V</b>                                         | 284.7 <sup>+2</sup> | <b>y<sub>5</sub>-NH<sub>3</sub><sup>+2</sup></b> | 511.9 <sup>+3</sup> | <b>y<sub>11</sub><sup>-</sup>-NH<sub>3</sub><sup>+3</sup></b> | 824.4 <sup>+2</sup> | <b>MH-NH<sub>3</sub><sup>+2</sup></b> | 1120.5 | <b>y<sub>7</sub>-NH<sub>3</sub></b> |
| 74.1               | <b>T</b>                                         | 287.2               | <b>a<sub>3</sub></b>                             | 512.3 <sup>+2</sup> | <b>y<sub>6</sub><sup>+2</sup></b>                             | 826.4               | <b>NvITS-28</b>                       | 1137.5 | <b>y<sub>7</sub></b>                |
| 74.1 <sup>+2</sup> | <b>y<sub>1</sub><sup>+2</sup></b>                | 287.2               | <b>TVN-28</b>                                    | 517.6 <sup>+3</sup> | <b>y<sub>11</sub><sup>+3</sup></b>                            | 832.9 <sup>+2</sup> | <b>MH<sup>+2</sup></b>                | 1140.5 | <b>TVNNviTS-28</b>                  |
| 84.1               | <b>K</b>                                         | 293.2 <sup>+2</sup> | <b>y<sub>5</sub><sup>+2</sup></b>                | 524.2               | <b>vi-28</b>                                                  | 836.4               | <b>NvITS-H<sub>2</sub>O</b>           | 1148.5 | <b>a<sub>8</sub>-NH<sub>3</sub></b> |

|                     |                                                |                     |                                                |                     |                                                |       |                         |        |                                  |
|---------------------|------------------------------------------------|---------------------|------------------------------------------------|---------------------|------------------------------------------------|-------|-------------------------|--------|----------------------------------|
| 86.1                | I                                              | 297.2               | $b_3\text{-H}_2\text{O}$                       | 525.2               | Nv-28                                          | 837.3 | NvITS-NH <sub>3</sub>   | 1150.5 | TVNNvi TS-H <sub>2</sub> O       |
| 87.1                | N                                              | 297.2               | TVN-H <sub>2</sub> O                           | 528.3               | b <sub>5</sub>                                 | 839.4 | TVNNv-28                | 1151.5 | TVNNvi TS-NH <sub>3</sub>        |
| 89.7 <sup>+3</sup>  | y <sub>2</sub> -NH <sub>3</sub> <sup>+3</sup>  | 298.1               | TVN-NH <sub>3</sub>                            | 528.3               | VTVNN                                          | 849.3 | TVNNv-H <sub>2</sub> O  | 1152.6 | VTVNNv IT-28                     |
| 95.4 <sup>+3</sup>  | y <sub>2</sub> <sup>+3</sup>                   | 298.1               | b <sub>3</sub> -NH <sub>3</sub>                | 536.2               | Nv-NH <sub>3</sub>                             | 849.4 | viTSH-28                | 1162.5 | VTVNNv IT-H <sub>2</sub> O       |
| 101.1               | K                                              | 298.2               | TSH-28                                         | 549.6 <sup>+3</sup> | MH-H <sub>2</sub> O <sup>+3</sup>              | 850.3 | TVNNv-NH <sub>3</sub>   | 1163.5 | VTVNNv IT-NH <sub>3</sub>        |
| 110.1               | H                                              | 300.2               | VNN-28                                         | 549.9 <sup>+3</sup> | MH-NH <sub>3</sub> <sup>+3</sup>               | 851.4 | VNNvi-28                | 1165.6 | a <sub>8</sub>                   |
| 118.4 <sup>+3</sup> | y <sub>3</sub> -H <sub>2</sub> O <sup>+3</sup> | 300.2               | VTV                                            | 552.2               | vi                                             | 853.4 | NNvit-28                | 1168.5 | TVNNvi TS                        |
| 118.7 <sup>+3</sup> | y <sub>3</sub> -NH <sub>3</sub> <sup>+3</sup>  | 302.2               | ITS                                            | 553.2               | Nv                                             | 854.4 | NvITS                   | 1175.5 | b <sub>8</sub> -H <sub>2</sub> O |
| 124.4 <sup>+3</sup> | y <sub>3</sub> <sup>+3</sup>                   | 308.1               | TSH-H <sub>2</sub> O                           | 555.6 <sup>+3</sup> | MH <sup>+3</sup>                               | 859.4 | viTSH-H <sub>2</sub> O  | 1176.5 | b <sub>8</sub> -NH <sub>3</sub>  |
| 126.1               | K                                              | 311.1               | VNN-NH <sub>3</sub>                            | 560.3 <sup>+2</sup> | y <sub>7</sub> -H <sub>2</sub> O <sup>+2</sup> | 862.4 | VNNvi-NH <sub>3</sub>   | 1176.5 | VNNvit SH-28                     |
| 129.1               | K                                              | 315.2               | TVN                                            | 560.8 <sup>+2</sup> | y <sub>7</sub> -NH <sub>3</sub> <sup>+2</sup>  | 863.4 | NNvit-H <sub>2</sub> O  | 1180.6 | VTVNNv IT                        |
| 130.1               | y <sub>1</sub> -NH <sub>3</sub>                | 315.2               | b <sub>3</sub>                                 | 567.3               | y <sub>5</sub> -H <sub>2</sub> O               | 864.3 | NNvit-NH <sub>3</sub>   | 1186.5 | VNNvit SH-H <sub>2</sub> O       |
| 134.1 <sup>+2</sup> | y <sub>2</sub> -NH <sub>3</sub> <sup>+2</sup>  | 326.1               | TSH                                            | 568.3               | y <sub>5</sub> -NH <sub>3</sub>                | 867.4 | TVNNv                   | 1187.5 | VNNvit SH-NH <sub>3</sub>        |
| 138.1               | H                                              | 328.2               | VNN                                            | 569.3 <sup>+2</sup> | y <sub>7</sub> <sup>+2</sup>                   | 877.4 | viTSH                   | 1193.6 | b <sub>8</sub>                   |
| 142.6 <sup>+2</sup> | y <sub>2</sub> <sup>+2</sup>                   | 335.8 <sup>+3</sup> | y <sub>6</sub> -H <sub>2</sub> O <sup>+3</sup> | 585.3               | y <sub>5</sub>                                 | 879.4 | VNNvi                   | 1204.5 | VNNvit SH                        |
| 147.1               | y <sub>1</sub>                                 | 336.2 <sup>+3</sup> | y <sub>6</sub> -NH <sub>3</sub> <sup>+3</sup>  | 597.3               | a <sub>6</sub> -NH <sub>3</sub>                | 881.4 | NNvit                   | 1233.6 | y <sub>8</sub> -H <sub>2</sub> O |
| 152.1 <sup>+3</sup> | y <sub>4</sub> -H <sub>2</sub> O <sup>+3</sup> | 341.8 <sup>+3</sup> | y <sub>6</sub> <sup>+3</sup>                   | 614.3               | a <sub>6</sub>                                 | 938.4 | VTVNNv-28               | 1234.5 | y <sub>8</sub> -NH <sub>3</sub>  |
| 152.4 <sup>+3</sup> | y <sub>4</sub> -NH <sub>3</sub> <sup>+3</sup>  | 353.2               | y <sub>3</sub> -H <sub>2</sub> O               | 617.3 <sup>+2</sup> | y <sub>8</sub> -H <sub>2</sub> O <sup>+2</sup> | 940.4 | NNvITS-28               | 1239.6 | VTVNNv ITS-28                    |
| 158.1 <sup>+3</sup> | y <sub>4</sub> <sup>+3</sup>                   | 354.2               | y <sub>3</sub> -NH <sub>3</sub>                | 617.8 <sup>+2</sup> | y <sub>8</sub> -NH <sub>3</sub> <sup>+2</sup>  | 948.4 | VTVNNv-H <sub>2</sub> O | 1249.6 | VTVNNv ITS-H <sub>2</sub> O      |
| 161.1               | TS-28                                          | 369.2               | a <sub>4</sub> -NH <sub>3</sub>                | 624.3               | b <sub>6</sub> -H <sub>2</sub> O               | 949.4 | VTVNNv-NH <sub>3</sub>  | 1249.6 | a <sub>9</sub> -NH <sub>3</sub>  |
| 169.1               | a <sub>2</sub> -NH <sub>3</sub>                | 371.2               | y <sub>3</sub>                                 | 625.3               | viT-28                                         | 950.4 | NNvITS-H <sub>2</sub> O | 1250.6 | VTVNNv ITS-NH <sub>3</sub>       |
| 171.1               | TS-H <sub>2</sub> O                            | 373.8 <sup>+3</sup> | y <sub>7</sub> -H <sub>2</sub> O <sup>+3</sup> | 625.3               | b <sub>6</sub> -NH <sub>3</sub>                | 951.4 | NNvITS-NH <sub>3</sub>  | 1251.6 | y <sub>8</sub>                   |
| 173.1               | VT-28                                          | 374.2 <sup>+3</sup> | y <sub>7</sub> -NH <sub>3</sub> <sup>+3</sup>  | 626.3 <sup>+2</sup> | y <sub>8</sub> <sup>+2</sup>                   | 952.4 | VNNvit-28               | 1266.6 | a <sub>9</sub>                   |
| 173.1               | TV-28                                          | 379.9 <sup>+3</sup> | y <sub>7</sub> <sup>+3</sup>                   | 635.3               | viT-H <sub>2</sub> O                           | 952.4 | TVNNvi-28               | 1267.6 | VTVNNv ITS                       |
| 177.1 <sup>+2</sup> | y <sub>3</sub> -H <sub>2</sub> O <sup>+2</sup> | 386.2               | VTVN-28                                        | 638.3               | Nvi-28                                         | 962.4 | VNNvit-H <sub>2</sub> O | 1276.6 | b <sub>9</sub> -H <sub>2</sub> O |
| 177.6 <sup>+2</sup> | y <sub>3</sub> -NH <sub>3</sub> <sup>+2</sup>  | 386.2               | a <sub>4</sub>                                 | 639.2               | NNv-28                                         | 962.4 | TVNNvi-H <sub>2</sub> O | 1277.6 | b <sub>9</sub> -NH <sub>3</sub>  |
| 183.1               | TV-H <sub>2</sub> O                            | 396.2               | VTVN-H <sub>2</sub> O                          | 642.3               | b <sub>6</sub>                                 | 963.4 | VNNvit-NH <sub>3</sub>  | 1277.6 | TVNNvi TSH-28                    |
| 183.1               | VT-H <sub>2</sub> O                            | 396.2               | b <sub>4</sub> -H <sub>2</sub> O               | 649.3               | Nvi-NH <sub>3</sub>                            | 963.4 | TVNNvi-NH <sub>3</sub>  | 1287.6 | TVNNvi TSH-                      |

|                     |                                                |                     |                                                              |                     |                                                              |        |                                  |        |                                   |
|---------------------|------------------------------------------------|---------------------|--------------------------------------------------------------|---------------------|--------------------------------------------------------------|--------|----------------------------------|--------|-----------------------------------|
|                     |                                                |                     |                                                              |                     |                                                              |        |                                  |        | H <sub>2</sub> O                  |
| 186.1 <sup>+2</sup> | y <sub>3</sub> <sup>+2</sup>                   | 397.2               | VTVN-NH <sub>3</sub>                                         | 650.2               | NNv-NH <sub>3</sub>                                          | 963.4  | NvITSH-28                        | 1288.6 | TVNNvI TSH-NH <sub>3</sub>        |
| 186.1               | a <sub>2</sub>                                 | 397.2               | b <sub>4</sub> -NH <sub>3</sub>                              | 653.3               | vIT                                                          | 966.4  | VTVNNv                           | 1294.6 | b <sub>9</sub>                    |
| 186.1               | VN-28                                          | 401.2               | TVNN-28                                                      | 666.3               | NvI                                                          | 968.4  | NNvITS                           | 1305.6 | TVNNvI TSH                        |
| 187.1               | IT-28                                          | 411.2               | TVNN-H <sub>2</sub> O                                        | 666.8 <sup>+2</sup> | y <sub>9</sub> -H <sub>2</sub> O <sup>+2</sup>               | 973.4  | NvITSH-H <sub>2</sub> O          | 1332.6 | y <sub>9</sub> -H <sub>2</sub> O  |
| 189.1               | TS                                             | 411.2               | ITSH-28                                                      | 667.2               | NNv                                                          | 974.4  | NvITSH-NH <sub>3</sub>           | 1333.6 | y <sub>9</sub> -NH <sub>3</sub>   |
| 189.8 <sup>+3</sup> | y <sub>5</sub> -H <sub>2</sub> O <sup>+3</sup> | 411.9 <sup>+3</sup> | y <sub>8</sub> -H <sub>2</sub> O <sup>+3</sup>               | 667.3 <sup>+2</sup> | y <sub>9</sub> -NH <sub>3</sub> <sup>+2</sup>                | 980.4  | VNNvIT                           | 1336.6 | a <sub>10</sub> -NH <sub>3</sub>  |
| 190.1 <sup>+3</sup> | y <sub>5</sub> -NH <sub>3</sub> <sup>+3</sup>  | 412.2               | TVNN-NH <sub>3</sub>                                         | 675.8 <sup>+2</sup> | y <sub>9</sub> <sup>+2</sup>                                 | 980.4  | TVNNvI                           | 1350.6 | y <sub>9</sub>                    |
| 195.8 <sup>+3</sup> | y <sub>5</sub> <sup>+3</sup>                   | 412.2 <sup>+3</sup> | y <sub>8</sub> -NH <sub>3</sub> <sup>+3</sup>                | 712.3               | vITS-28                                                      | 991.4  | NvITSH                           | 1353.6 | a <sub>10</sub>                   |
| 197.1               | VN-NH <sub>3</sub>                             | 414.2               | VTVN                                                         | 717.3 <sup>+2</sup> | y <sub>10</sub> <sup>-</sup> -H <sub>2</sub> O <sup>+2</sup> | 1005.5 | y <sub>6</sub> -H <sub>2</sub> O | 1363.6 | b <sub>10</sub> -H <sub>2</sub> O |
| 197.1               | b <sub>2</sub> -NH <sub>3</sub>                | 414.2               | b <sub>4</sub>                                               | 717.8 <sup>+2</sup> | y <sub>10</sub> <sup>-</sup> -NH <sub>3</sub> <sup>+2</sup>  | 1006.5 | y <sub>6</sub> -NH <sub>3</sub>  | 1364.6 | b <sub>10</sub> -NH <sub>3</sub>  |
| 197.1               | SH-28                                          | 417.9 <sup>+3</sup> | y <sub>8</sub> <sup>+3</sup>                                 | 722.3               | vITS-H <sub>2</sub> O                                        | 1023.5 | y <sub>6</sub>                   | 1376.7 | VTVNNv ITSH-28                    |
| 197.1               | IT-H <sub>2</sub> O                            | 421.2               | ITSH-H <sub>2</sub> O                                        | 726.4 <sup>+2</sup> | y <sub>10</sub> <sup>+2</sup>                                | 1035.4 | a <sub>7</sub> -NH <sub>3</sub>  | 1381.6 | b <sub>10</sub>                   |
| 201.1               | NN-28                                          | 429.2               | TVNN                                                         | 737.3 <sup>+2</sup> | a <sub>11</sub> <sup>-</sup> -NH <sub>3</sub> <sup>+2</sup>  | 1039.5 | VNNvIT S-28                      | 1386.6 | VTVNNv ITSH-H <sub>2</sub> O      |
| 201.1               | VT                                             | 439.2               | ITSH                                                         | 738.3               | VNNv-28                                                      | 1049.5 | VNNvIT S-H <sub>2</sub> O        | 1387.6 | VTVNNv ITSH-NH <sub>3</sub>       |
| 201.1               | TV                                             | 444.9 <sup>+3</sup> | y <sub>9</sub> -H <sub>2</sub> O <sup>+3</sup>               | 739.3               | NvIT-28                                                      | 1050.4 | VNNvIT S-NH <sub>3</sub>         | 1404.6 | VTVNNv ITSH                       |
| 207.1               | SH-H <sub>2</sub> O                            | 445.2 <sup>+3</sup> | y <sub>9</sub> -NH <sub>3</sub> <sup>+3</sup>                | 740.3               | vITS                                                         | 1051.5 | VTVNNv I-28                      | 1433.7 | y <sub>10</sub> -H <sub>2</sub> O |
| 212.1               | NN-NH <sub>3</sub>                             | 450.9 <sup>+3</sup> | y <sub>9</sub> <sup>+3</sup>                                 | 745.9 <sup>+2</sup> | a <sub>11</sub> <sup>+2</sup>                                | 1052.5 | a <sub>7</sub>                   | 1434.7 | y <sub>10</sub> -NH <sub>3</sub>  |
| 214.1               | b <sub>2</sub>                                 | 454.2               | y <sub>4</sub> -H <sub>2</sub> O                             | 749.3               | VNNv-NH <sub>3</sub>                                         | 1053.5 | TVNNvI T-28                      | 1451.7 | y <sub>10</sub>                   |
| 214.1               | VN                                             | 455.2               | y <sub>4</sub> -NH <sub>3</sub>                              | 749.3               | NvIT-H <sub>2</sub> O                                        | 1061.5 | VTVNNv I-H <sub>2</sub> O        | 1473.7 | a <sub>11</sub> -NH <sub>3</sub>  |
| 215.1               | IT                                             | 472.3               | y <sub>4</sub>                                               | 750.3               | NvIT-NH <sub>3</sub>                                         | 1062.5 | b <sub>7</sub> -H <sub>2</sub> O | 1490.7 | a <sub>11</sub>                   |
| 225.1               | SH                                             | 478.6 <sup>+3</sup> | y <sub>10</sub> <sup>-</sup> -H <sub>2</sub> O <sup>+3</sup> | 750.8 <sup>+2</sup> | b <sub>11</sub> <sup>-</sup> -H <sub>2</sub> O <sup>+2</sup> | 1062.5 | VTVNNv I-NH <sub>3</sub>         | 1500.7 | b <sub>11</sub> -H <sub>2</sub> O |
| 227.6 <sup>+2</sup> | y <sub>4</sub> -H <sub>2</sub> O <sup>+2</sup> | 478.9 <sup>+3</sup> | y <sub>10</sub> <sup>-</sup> -NH <sub>3</sub> <sup>+3</sup>  | 751.3 <sup>+2</sup> | b <sub>11</sub> <sup>-</sup> -NH <sub>3</sub> <sup>+2</sup>  | 1063.4 | b <sub>7</sub> -NH <sub>3</sub>  | 1501.7 | b <sub>11</sub> -NH <sub>3</sub>  |
| 228.1 <sup>+2</sup> | y <sub>4</sub> -NH <sub>3</sub> <sup>+2</sup>  | 483.3               | a <sub>5</sub> -NH <sub>3</sub>                              | 752.3               | NNvI-28                                                      | 1063.5 | TVNNvI T-H <sub>2</sub> O        | 1518.7 | b <sub>11</sub>                   |
| 229.1               | NN                                             | 484.6 <sup>+3</sup> | y <sub>10</sub> <sup>+3</sup>                                | 759.9 <sup>+2</sup> | b <sub>11</sub> <sup>+2</sup>                                | 1064.5 | TVNNvI T-NH <sub>3</sub>         | 1532.7 | y <sub>11</sub> -H <sub>2</sub> O |
| 236.6 <sup>+2</sup> | y <sub>4</sub> <sup>+2</sup>                   | 500.3               | a <sub>5</sub>                                               | 763.3               | NNvI-NH <sub>3</sub>                                         | 1067.5 | VNNvIT S                         | 1533.7 | y <sub>11</sub> -NH <sub>3</sub>  |
| 267.1               | y <sub>2</sub> -NH <sub>3</sub>                | 500.3               | VTVNN-28                                                     | 766.3               | VNNv                                                         | 1077.5 | NNvITS H-28                      | 1536.7 | b <sub>11</sub> +H <sub>2</sub> O |
| 270.1               | a <sub>3</sub> -NH <sub>3</sub>                | 503.2 <sup>+2</sup> | y <sub>6</sub> -H <sub>2</sub> O <sup>+2</sup>               | 766.9 <sup>+2</sup> | y <sub>11</sub> <sup>-</sup> -H <sub>2</sub> O <sup>+2</sup> | 1079.5 | VTVNNv I                         | 1550.8 | y <sub>11</sub>                   |

|       |                      |                     |                                               |                     |                                                 |        |                              |        |                     |
|-------|----------------------|---------------------|-----------------------------------------------|---------------------|-------------------------------------------------|--------|------------------------------|--------|---------------------|
| 272.2 | VTV-28               | 503.7 <sup>+2</sup> | y <sub>6</sub> -NH <sub>3</sub> <sup>+2</sup> | 767.3               | NvIT                                            | 1080.5 | b <sub>7</sub>               | 1646.8 | MH-H <sub>2</sub> O |
| 274.2 | ITS-28               | 510.3               | b <sub>5</sub> -H <sub>2</sub> O              | 767.4 <sup>+2</sup> | y <sub>11</sub> -NH <sub>3</sub> <sup>+2</sup>  | 1081.5 | TVNNvIT                      | 1647.8 | MH-NH <sub>3</sub>  |
| 282.2 | VTV-H <sub>2</sub> O | 510.3               | VTVNN-H <sub>2</sub> O                        | 768.9 <sup>+2</sup> | b <sub>11</sub> +H <sub>2</sub> O <sup>+2</sup> | 1087.5 | NNvITS<br>H-H <sub>2</sub> O | 1664.8 | MH                  |
| 284.2 | ITS-H <sub>2</sub> O | 511.3               | b <sub>5</sub> -NH <sub>3</sub>               | 775.9 <sup>+2</sup> | y <sub>11</sub> <sup>+2</sup>                   | 1088.4 | NNvITSH-NH <sub>3</sub>      |        |                     |

## ITTKTGTTINATTGNVE MS/MS on C13 isotope

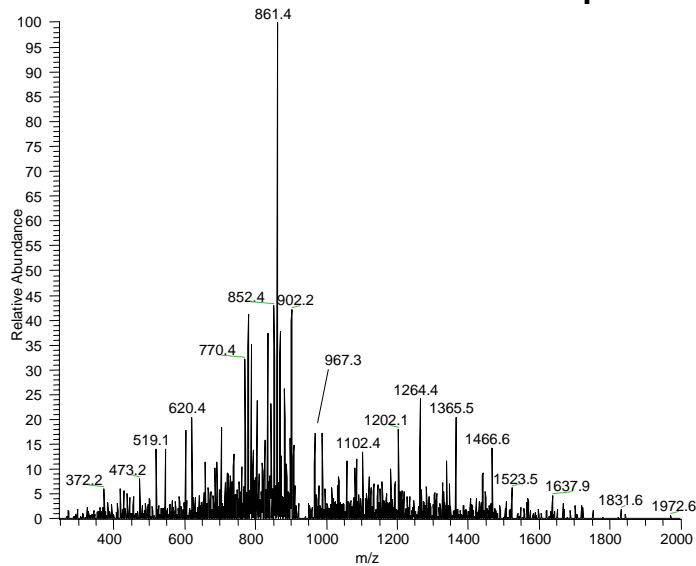

|       |                                  |       |                       |                     |                                                    |                     |                                                     |        |                                      |
|-------|----------------------------------|-------|-----------------------|---------------------|----------------------------------------------------|---------------------|-----------------------------------------------------|--------|--------------------------------------|
| 72.1  | V                                | 354.2 | TGNV-H <sub>2</sub> O | 589.2               | uATTG-H <sub>2</sub> O                             | 834.4               | luATTG<br>N                                         | 1175.6 | b <sub>10</sub> -H <sub>2</sub> O    |
| 74.1  | T                                | 355.2 | TGNV-NH <sub>3</sub>  | 590.3               | TKKTGT                                             | 835.4 <sup>+2</sup> | y <sub>15</sub> <sup>+2</sup>                       | 1176.5 | TGTTlu<br>ATTGN-<br>H <sub>2</sub> O |
| 84.1  | K                                | 355.2 | GTTI-H <sub>2</sub> O | 590.3               | TKTGTT                                             | 837.4               | TTluAT<br>T-28                                      | 1176.6 | b <sub>10</sub> -NH <sub>3</sub>     |
| 86.1  | I                                | 356.2 | TTGN-H <sub>2</sub> O | 592.3               | TTlu                                               | 846.4 <sup>+2</sup> | a <sub>16</sub> -<br>NH <sub>3</sub> <sup>+2</sup>  | 1177.5 | TGTTlu<br>ATTGN-<br>NH <sub>3</sub>  |
| 87.1  | N                                | 357.1 | TTGN-NH <sub>3</sub>  | 597.3 <sup>+2</sup> | b <sub>10</sub> <sup>+2</sup>                      | 847.4               | TTluAT<br>T-H <sub>2</sub> O                        | 1180.6 | KTGTTI<br>uATTG-<br>28               |
| 101.1 | K                                | 360.2 | TKTG-28               | 602.3               | y <sub>6</sub> -H <sub>2</sub> O                   | 850.5               | KTGTTI<br>u-28                                      | 1181.6 | y <sub>10</sub>                      |
| 102.1 | E                                | 360.2 | KTGT-28               | 602.4               | b <sub>6</sub>                                     | 855.0 <sup>+2</sup> | a <sub>16</sub> <sup>+2</sup>                       | 1190.6 | KTGTTI<br>uATTG-<br>H <sub>2</sub> O |
| 126.1 | K                                | 361.2 | TGTT                  | 602.4               | KTGTTI                                             | 859.9 <sup>+2</sup> | b <sub>16</sub> -<br>H <sub>2</sub> O <sup>+2</sup> | 1191.6 | KTGTTI<br>uATTG-<br>NH <sub>3</sub>  |
| 129.1 | K                                | 361.2 | y <sub>3</sub>        | 603.3               | y <sub>6</sub> -NH <sub>3</sub>                    | 860.4 <sup>+2</sup> | b <sub>16</sub> -<br>NH <sub>3</sub> <sup>+2</sup>  | 1192.6 | GTTluA<br>TTGNV                      |
| 130.0 | y <sub>1</sub> -H <sub>2</sub> O | 362.2 | lu-28                 | 607.3               | uATTG                                              | 860.4               | KTGTTI<br>u-H <sub>2</sub> O                        | 1193.6 | b <sub>10</sub>                      |
| 131.1 | TG-28                            | 370.2 | TKTG-H <sub>2</sub> O | 610.3 <sup>+2</sup> | a <sub>11</sub> -<br>NH <sub>3</sub> <sup>+2</sup> | 861.4               | KTGTTI<br>u-NH <sub>3</sub>                         | 1194.5 | TGTTlu<br>ATTGN                      |



|                     |                                                  |                     |                                                  |                     |                                                               |                     |                                                               |        |                                      |
|---------------------|--------------------------------------------------|---------------------|--------------------------------------------------|---------------------|---------------------------------------------------------------|---------------------|---------------------------------------------------------------|--------|--------------------------------------|
| 131.1               | <b>GT-28</b>                                     | 370.2               | <b>KTGT-H<sub>2</sub>O</b>                       | 618.8 <sup>+2</sup> | <b>a<sub>11</sub><sup>+2</sup></b>                            | 865.4               | <b>TTluAT T</b>                                               | 1208.6 | <b>KTGTTI uATTG</b>                  |
| 141.1               | <b>TG-H<sub>2</sub>O</b>                         | 371.2               | <b>TKTG-NH<sub>3</sub></b>                       | 620.3               | <b>y<sub>6</sub></b>                                          | 869.0 <sup>+2</sup> | <b>b<sub>16</sub><sup>+2</sup></b>                            | 1219.6 | <b>a<sub>11</sub>-NH<sub>3</sub></b> |
| 141.1               | <b>GT-H<sub>2</sub>O</b>                         | 371.2               | <b>KTGT-NH<sub>3</sub></b>                       | 621.3               | <b>GTTlu-28</b>                                               | 872.5               | <b>a<sub>9</sub>-NH<sub>3</sub></b>                           | 1224.6 | <b>TKTGTT luATT-28</b>               |
| 144.1               | <b>GN-28</b>                                     | 372.2               | <b>TGNV</b>                                      | 623.8 <sup>+2</sup> | <b>b<sub>11</sub>-H<sub>2</sub>O<sup>+2</sup></b>             | 876.9 <sup>+2</sup> | <b>y<sub>16</sub><sup>-</sup>-H<sub>2</sub>O<sup>+2</sup></b> | 1224.6 | <b>TTKTGT TluAT-28</b>               |
| 145.1               | <b>AT-28</b>                                     | 373.2               | <b>GTTI</b>                                      | 624.3 <sup>+2</sup> | <b>b<sub>11</sub>-NH<sub>3</sub><sup>+2</sup></b>             | 877.4 <sup>+2</sup> | <b>y<sub>16</sub><sup>-</sup>-NH<sub>3</sub><sup>+2</sup></b> | 1234.6 | <b>TKTGTT luATT-H<sub>2</sub>O</b>   |
| 148.1               | <b>y<sub>1</sub></b>                             | 374.2               | <b>TTGN</b>                                      | 631.3               | <b>GTTlu-H<sub>2</sub>O</b>                                   | 878.0 <sup>+2</sup> | <b>b<sub>16</sub>+H<sub>2</sub>O<sup>+2</sup></b>             | 1234.6 | <b>TTKTGT TluAT-H<sub>2</sub>O</b>   |
| 155.0               | <b>GN-NH<sub>3</sub></b>                         | 380.2 <sup>+2</sup> | <b>a<sub>8</sub>-NH<sub>3</sub><sup>+2</sup></b> | 632.8 <sup>+2</sup> | <b>b<sub>11</sub><sup>+2</sup></b>                            | 878.4               | <b>KTGTTI u</b>                                               | 1235.6 | <b>TKTGTT luATT-NH<sub>3</sub></b>   |
| 155.1               | <b>AT-H<sub>2</sub>O</b>                         | 388.2               | <b>TKTG</b>                                      | 635.3               | <b>luATT-28</b>                                               | 885.9 <sup>+2</sup> | <b>y<sub>16</sub><sup>+2</sup></b>                            | 1235.6 | <b>TTKTGT TluAT-NH<sub>3</sub></b>   |
| 159.1               | <b>TG</b>                                        | 388.2               | <b>KTGT</b>                                      | 635.3               | <b>TluAT-28</b>                                               | 889.5               | <b>a<sub>9</sub></b>                                          | 1236.7 | <b>a<sub>11</sub></b>                |
| 159.1               | <b>GT</b>                                        | 388.7 <sup>+2</sup> | <b>a<sub>8</sub><sup>+2</sup></b>                | 635.3               | <b>TTluA-28</b>                                               | 894.4               | <b>TTluAT TG-28</b>                                           | 1246.7 | <b>b<sub>11</sub>-H<sub>2</sub>O</b> |
| 172.1               | <b>GN</b>                                        | 390.2               | <b>lu</b>                                        | 645.3               | <b>luATT-H<sub>2</sub>O</b>                                   | 894.4               | <b>GTTluA TT-28</b>                                           | 1247.6 | <b>b<sub>11</sub>-NH<sub>3</sub></b> |
| 173.1               | <b>AT</b>                                        | 393.7 <sup>+2</sup> | <b>b<sub>8</sub>-H<sub>2</sub>O<sup>+2</sup></b> | 645.3               | <b>TluAT-H<sub>2</sub>O</b>                                   | 894.4               | <b>TGTTlu AT-28</b>                                           | 1252.6 | <b>TKTGTT luATT</b>                  |
| 175.1               | <b>TT-28</b>                                     | 394.2 <sup>+2</sup> | <b>b<sub>8</sub>-NH<sub>3</sub><sup>+2</sup></b> | 645.3               | <b>TTluA-H<sub>2</sub>O</b>                                   | 899.5               | <b>b<sub>9</sub>-H<sub>2</sub>O</b>                           | 1252.6 | <b>TTKTGT TluAT</b>                  |
| 185.1               | <b>TT-H<sub>2</sub>O</b>                         | 399.3               | <b>a<sub>4</sub>-NH<sub>3</sub></b>              | 649.3               | <b>GTTlu</b>                                                  | 900.5               | <b>b<sub>9</sub>-NH<sub>3</sub></b>                           | 1264.6 | <b>y<sub>11</sub>-H<sub>2</sub>O</b> |
| 186.1               | <b>NV-28</b>                                     | 400.2               | <b>y<sub>4</sub>-H<sub>2</sub>O</b>              | 658.4               | <b>a<sub>7</sub>-NH<sub>3</sub></b>                           | 904.4               | <b>TTluAT TG-H<sub>2</sub>O</b>                               | 1264.7 | <b>b<sub>11</sub></b>                |
| 187.1               | <b>a<sub>2</sub></b>                             | 401.2               | <b>y<sub>4</sub>-NH<sub>3</sub></b>              | 660.9 <sup>+2</sup> | <b>a<sub>12</sub><sup>-</sup>-NH<sub>3</sub><sup>+2</sup></b> | 904.4               | <b>GTTluA TT-H<sub>2</sub>O</b>                               | 1265.6 | <b>y<sub>11</sub>-NH<sub>3</sub></b> |
| 187.1               | <b>TI-28</b>                                     | 402.7 <sup>+2</sup> | <b>b<sub>8</sub><sup>+2</sup></b>                | 663.3               | <b>luATT</b>                                                  | 904.4               | <b>TGTTlu AT-H<sub>2</sub>O</b>                               | 1265.6 | <b>TGTTlu ATTGN V-28</b>             |
| 197.1               | <b>NV-NH<sub>3</sub></b>                         | 404.3               | <b>TTKT-28</b>                                   | 663.3               | <b>TluAT</b>                                                  | 905.5               | <b>luATTG NV-28</b>                                           | 1275.6 | <b>TGTTlu ATTGN V-H<sub>2</sub>O</b> |
| 197.1               | <b>b<sub>2</sub>-H<sub>2</sub>O</b>              | 414.2               | <b>TTKT-H<sub>2</sub>O</b>                       | 663.3               | <b>TTluA</b>                                                  | 907.4               | <b>TluATT GN-28</b>                                           | 1276.6 | <b>TGTTlu ATTGN V-NH<sub>3</sub></b> |
| 197.1               | <b>TI-H<sub>2</sub>O</b>                         | 415.2               | <b>TTKT-NH<sub>3</sub></b>                       | 663.4               | <b>TTKTGT T-28</b>                                            | 915.4               | <b>luATTG NV-H<sub>2</sub>O</b>                               | 1281.7 | <b>TKTGTT luATTG-28</b>              |
| 200.1 <sup>+2</sup> | <b>a<sub>4</sub>-NH<sub>3</sub><sup>+2</sup></b> | 416.3               | <b>a<sub>4</sub></b>                             | 669.4 <sup>+2</sup> | <b>a<sub>12</sub><sup>+2</sup></b>                            | 916.4               | <b>luATTG NV-NH<sub>3</sub></b>                               | 1282.6 | <b>y<sub>11</sub></b>                |
| 202.2               | <b>TK-28</b>                                     | 417.2               | <b>ATTGN-28</b>                                  | 673.3               | <b>y<sub>7</sub>-H<sub>2</sub>O</b>                           | 917.4               | <b>TluATT GN-H<sub>2</sub>O</b>                               | 1291.6 | <b>TKTGTT luATTG-H<sub>2</sub>O</b>  |

|                     |                                                  |                     |                                                  |                            |                                                        |                     |                                            |        |                                               |
|---------------------|--------------------------------------------------|---------------------|--------------------------------------------------|----------------------------|--------------------------------------------------------|---------------------|--------------------------------------------|--------|-----------------------------------------------|
| 202.2               | <b>KT-28</b>                                     | 418.2               | <b>y<sub>4</sub></b>                             | 673.4                      | <b>TTKTGT<br/>T-H<sub>2</sub>O</b>                     | 917.5               | <b>b<sub>9</sub></b>                       | 1292.6 | <b>TKTGTT<br/>luATTG-<br/>NH<sub>3</sub></b>  |
| 203.1               | <b>TT</b>                                        | 421.2               | <b>uAT-28</b>                                    | 674.3                      | <b>y<sub>7</sub>-NH<sub>3</sub></b>                    | 918.4               | <b>TluATT<br/>GN-NH<sub>3</sub></b>        | 1293.6 | <b>TGTTlu<br/>ATTGN<br/>V</b>                 |
| 208.7 <sup>+2</sup> | <b>a<sub>4</sub><sup>+2</sup></b>                | 426.3               | <b>b<sub>4</sub>-H<sub>2</sub>O</b>              | 674.3                      | <b>TTKTGT<br/>T-NH<sub>3</sub></b>                     | 921.5               | <b>KTGTTI<br/>uA-28</b>                    | 1294.6 | <b>KTGTTI<br/>uATTG<br/>N-28</b>              |
| 212.1               | <b>TK-H<sub>2</sub>O</b>                         | 427.2               | <b>ATTGN-<br/>H<sub>2</sub>O</b>                 | 674.353<br>7 <sup>+2</sup> | <b>b<sub>12</sub>-<br/>H<sub>2</sub>O<sup>+2</sup></b> | 922.4               | <b>TluATT<br/>TG</b>                       | 1304.6 | <b>KTGTTI<br/>uATTG<br/>N-H<sub>2</sub>O</b>  |
| 212.1               | <b>KT-H<sub>2</sub>O</b>                         | 427.3               | <b>b<sub>4</sub>-NH<sub>3</sub></b>              | 674.9 <sup>+2</sup>        | <b>b<sub>12</sub>-<br/>NH<sub>3</sub><sup>+2</sup></b> | 922.4               | <b>GTTluA<br/>TT</b>                       | 1305.6 | <b>KTGTTI<br/>uATTG<br/>N-NH<sub>3</sub></b>  |
| 213.1               | <b>TK-NH<sub>3</sub></b>                         | 428.2               | <b>ATTGN-<br/>NH<sub>3</sub></b>                 | 675.4                      | <b>TKTGTT<br/>I-28</b>                                 | 922.4               | <b>TGTTlu<br/>AT</b>                       | 1309.6 | <b>TKTGTT<br/>luATTG</b>                      |
| 213.1               | <b>KT-NH<sub>3</sub></b>                         | 431.2               | <b>uAT-<br/>H<sub>2</sub>O</b>                   | 675.4                      | <b>a<sub>7</sub></b>                                   | 931.5               | <b>KTGTTI<br/>uA-H<sub>2</sub>O</b>        | 1320.7 | <b>a<sub>12</sub>-NH<sub>3</sub></b>          |
| 213.6 <sup>+2</sup> | <b>b<sub>4</sub>-H<sub>2</sub>O<sup>+2</sup></b> | 432.2               | <b>TTKT</b>                                      | 683.4 <sup>+2</sup>        | <b>b<sub>12</sub><sup>+2</sup></b>                     | 932.5               | <b>KTGTTI<br/>uA-NH<sub>3</sub></b>        | 1321.6 | <b>y<sub>12</sub>-H<sub>2</sub>O</b>          |
| 214.1               | <b>NV</b>                                        | 433.2               | <b>luA-28</b>                                    | 685.4                      | <b>TKTGTT<br/>I-H<sub>2</sub>O</b>                     | 933.5               | <b>luATTG<br/>NV</b>                       | 1322.6 | <b>y<sub>12</sub>-NH<sub>3</sub></b>          |
| 214.1 <sup>+2</sup> | <b>b<sub>4</sub>-NH<sub>3</sub><sup>+2</sup></b> | 436.8 <sup>+2</sup> | <b>a<sub>9</sub>-NH<sub>3</sub><sup>+2</sup></b> | 685.4                      | <b>b<sub>7</sub>-H<sub>2</sub>O</b>                    | 933.5 <sup>+2</sup> | <b>MH-<br/>H<sub>2</sub>O<sup>+2</sup></b> | 1322.6 | <b>KTGTTI<br/>uATTG<br/>N</b>                 |
| 215.1               | <b>b<sub>2</sub></b>                             | 444.3               | <b>b<sub>4</sub></b>                             | 686.4                      | <b>TKTGTT<br/>I-NH<sub>3</sub></b>                     | 934.0 <sup>+2</sup> | <b>MH-<br/>NH<sub>3</sub><sup>+2</sup></b> | 1325.7 | <b>TTKTGT<br/>TluATT-<br/>28</b>              |
| 215.1               | <b>TI</b>                                        | 445.2               | <b>ATTGN</b>                                     | 686.4                      | <b>b<sub>7</sub>-NH<sub>3</sub></b>                    | 935.4               | <b>TluATT<br/>GN</b>                       | 1335.7 | <b>TTKTGT<br/>TluATT-<br/>H<sub>2</sub>O</b>  |
| 222.7 <sup>+2</sup> | <b>b<sub>4</sub><sup>+2</sup></b>                | 445.2               | <b>TTGNV-<br/>28</b>                             | 691.3                      | <b>y<sub>7</sub></b>                                   | 942.5 <sup>+2</sup> | <b>MH<sup>+2</sup></b>                     | 1336.6 | <b>TTKTGT<br/>TluATT-<br/>NH<sub>3</sub></b>  |
| 229.1               | <b>y<sub>2</sub>-H<sub>2</sub>O</b>              | 445.3 <sup>+2</sup> | <b>a<sub>9</sub><sup>+2</sup></b>                | 691.4                      | <b>TTKTGT<br/>T</b>                                    | 949.4               | <b>y<sub>8</sub>-H<sub>2</sub>O</b>        | 1337.7 | <b>a<sub>12</sub></b>                         |
| 230.1               | <b>TK</b>                                        | 446.3               | <b>TGTTI-<br/>28</b>                             | 692.3                      | <b>luATTG-<br/>28</b>                                  | 949.5               | <b>KTGTTI<br/>uA</b>                       | 1339.6 | <b>y<sub>12</sub></b>                         |
| 230.1               | <b>KT</b>                                        | 449.2               | <b>uAT</b>                                       | 692.3                      | <b>GTTluA-<br/>28</b>                                  | 950.4               | <b>y<sub>8</sub>-NH<sub>3</sub></b>        | 1347.7 | <b>b<sub>12</sub>-H<sub>2</sub>O</b>          |
| 232.1               | <b>TTG-28</b>                                    | 450.3 <sup>+2</sup> | <b>b<sub>9</sub>-H<sub>2</sub>O<sup>+2</sup></b> | 693.3                      | <b>uATTG<br/>N-28</b>                                  | 951.5               | <b>GTTluA<br/>TTG-28</b>                   | 1348.7 | <b>b<sub>12</sub>-NH<sub>3</sub></b>          |
| 232.1               | <b>TGT-28</b>                                    | 450.8 <sup>+2</sup> | <b>b<sub>9</sub>-NH<sub>3</sub><sup>+2</sup></b> | 702.3                      | <b>luATTG-<br/>H<sub>2</sub>O</b>                      | 951.5               | <b>TKTGTT<br/>lu-28</b>                    | 1353.7 | <b>TTKTGT<br/>TluATT</b>                      |
| 232.1               | <b>GTT-28</b>                                    | 455.2               | <b>TTGNV-<br/>H<sub>2</sub>O</b>                 | 702.3                      | <b>GTTluA-<br/>H<sub>2</sub>O</b>                      | 961.4               | <b>GTTluA<br/>TTG-<br/>H<sub>2</sub>O</b>  | 1365.7 | <b>b<sub>12</sub></b>                         |
| 242.1               | <b>TTG-<br/>H<sub>2</sub>O</b>                   | 456.2               | <b>TTGNV-<br/>NH<sub>3</sub></b>                 | 703.3                      | <b>uATTG<br/>N-H<sub>2</sub>O</b>                      | 961.5               | <b>TKTGTT<br/>lu-H<sub>2</sub>O</b>        | 1382.7 | <b>TTKTGT<br/>TluATT<br/>G-28</b>             |
| 242.1               | <b>TGT-<br/>H<sub>2</sub>O</b>                   | 456.2               | <b>TGTTI-<br/>H<sub>2</sub>O</b>                 | 703.4                      | <b>TKTGTT<br/>I</b>                                    | 962.5               | <b>TKTGTT<br/>lu-NH<sub>3</sub></b>        | 1392.7 | <b>TTKTGT<br/>TluATT<br/>G-H<sub>2</sub>O</b> |

|                     |                                                  |                     |                                     |                            |                                                                   |        |                                           |        |                                               |
|---------------------|--------------------------------------------------|---------------------|-------------------------------------|----------------------------|-------------------------------------------------------------------|--------|-------------------------------------------|--------|-----------------------------------------------|
| 242.1               | <b>GTT-H<sub>2</sub>O</b>                        | 459.3 <sup>+2</sup> | <b>b<sub>9</sub><sup>+2</sup></b>   | 703.4                      | <b>b<sub>7</sub></b>                                              | 967.4  | <b>y<sub>8</sub></b>                      | 1393.7 | <b>TTKTGT<br/>TluATT<br/>G-NH<sub>3</sub></b> |
| 243.1               | <b>GNV-28</b>                                    | 461.2               | <b>luA</b>                          | 704.3                      | <b>uATTG<br/>N-NH<sub>3</sub></b>                                 | 979.5  | <b>GTTluA<br/>TTG</b>                     | 1393.7 | <b>KTGTTI<br/>uATTG<br/>NV-28</b>             |
| 245.1               | <b>TGN-28</b>                                    | 461.3               | <b>TTKTG-<br/>28</b>                | 711.4 <sup>+2</sup>        | <b>a<sub>13</sub><sup>-</sup><br/>NH<sub>3</sub><sup>+2</sup></b> | 979.5  | <b>TKTGTT<br/>lu</b>                      | 1395.7 | <b>TKTGTT<br/>luATTG<br/>N-28</b>             |
| 246.1               | <b>ATT-28</b>                                    | 461.3               | <b>TKTGT-<br/>28</b>                | 719.885<br>4 <sup>+2</sup> | <b>a<sub>13</sub><sup>+2</sup></b>                                | 995.5  | <b>TGTTlu<br/>ATT-28</b>                  | 1403.7 | <b>KTGTTI<br/>uATTG<br/>NV-H<sub>2</sub>O</b> |
| 247.1               | <b>y<sub>2</sub></b>                             | 461.3               | <b>KTGTT-<br/>28</b>                | 720.3                      | <b>luATTG</b>                                                     | 1005.5 | <b>TGTTlu<br/>ATT-<br/>H<sub>2</sub>O</b> | 1404.7 | <b>KTGTTI<br/>uATTG<br/>NV-NH<sub>3</sub></b> |
| 250.7 <sup>+2</sup> | <b>a<sub>5</sub>-NH<sub>3</sub><sup>+2</sup></b> | 463.2               | <b>Tlu-28</b>                       | 720.3                      | <b>GTTluA</b>                                                     | 1006.5 | <b>TluATT<br/>GNV-28</b>                  | 1405.7 | <b>TKTGTT<br/>luATTG<br/>N-H<sub>2</sub>O</b> |
| 254.1               | <b>GNV-<br/>NH<sub>3</sub></b>                   | 471.3               | <b>TKTGT-<br/>H<sub>2</sub>O</b>    | 721.3                      | <b>uATTG<br/>N</b>                                                | 1008.5 | <b>TTluAT<br/>TGN-28</b>                  | 1406.7 | <b>TKTGTT<br/>luATTG<br/>N-NH<sub>3</sub></b> |
| 255.1               | <b>TGN-<br/>H<sub>2</sub>O</b>                   | 471.3               | <b>TTKTG-<br/>H<sub>2</sub>O</b>    | 722.4                      | <b>TGTTlu-<br/>28</b>                                             | 1016.5 | <b>TluATT<br/>GNV-<br/>H<sub>2</sub>O</b> | 1410.7 | <b>TTKTGT<br/>TluATT<br/>G</b>                |
| 256.1               | <b>TGN-<br/>NH<sub>3</sub></b>                   | 471.3               | <b>KTGTT-<br/>H<sub>2</sub>O</b>    | 724.9 <sup>+2</sup>        | <b>b<sub>13</sub><sup>-</sup><br/>H<sub>2</sub>O<sup>+2</sup></b> | 1017.5 | <b>TluATT<br/>GNV-<br/>NH<sub>3</sub></b> | 1421.7 | <b>KTGTTI<br/>uATTG<br/>NV</b>                |
| 256.1               | <b>ATT-<br/>H<sub>2</sub>O</b>                   | 472.2               | <b>TKTGT-<br/>NH<sub>3</sub></b>    | 725.369<br>6 <sup>+2</sup> | <b>b<sub>13</sub><sup>-</sup><br/>NH<sub>3</sub><sup>+2</sup></b> | 1018.5 | <b>TTluAT<br/>TGN-<br/>H<sub>2</sub>O</b> | 1421.7 | <b>a<sub>13</sub>-NH<sub>3</sub></b>          |
| 259.2 <sup>+2</sup> | <b>a<sub>5</sub><sup>+2</sup></b>                | 472.2               | <b>TTKTG-<br/>NH<sub>3</sub></b>    | 732.3                      | <b>TGTTlu-<br/>H<sub>2</sub>O</b>                                 | 1019.5 | <b>TTluAT<br/>TGN-<br/>NH<sub>3</sub></b> | 1422.7 | <b>y<sub>13</sub>-H<sub>2</sub>O</b>          |
| 259.2               | <b>KTG-28</b>                                    | 472.2               | <b>KTGTT-<br/>NH<sub>3</sub></b>    | 733.882<br>9 <sup>+2</sup> | <b>b<sub>13</sub><sup>+2</sup></b>                                | 1022.5 | <b>TKTGTT<br/>luA-28</b>                  | 1423.6 | <b>y<sub>13</sub>-NH<sub>3</sub></b>          |
| 260.1               | <b>TTG</b>                                       | 473.2               | <b>Tlu-H<sub>2</sub>O</b>           | 736.4                      | <b>TluATT-<br/>28</b>                                             | 1022.5 | <b>KTGTTI<br/>uAT-28</b>                  | 1423.7 | <b>TKTGTT<br/>luATTG<br/>N</b>                |
| 260.1               | <b>TGT</b>                                       | 473.2               | <b>TTGNV</b>                        | 736.4                      | <b>TTluAT-<br/>28</b>                                             | 1023.5 | <b>TGTTlu<br/>ATT</b>                     | 1438.8 | <b>a<sub>13</sub></b>                         |
| 260.1               | <b>GTT</b>                                       | 474.3               | <b>TGTTI</b>                        | 739.9 <sup>+2</sup>        | <b>a<sub>14</sub><sup>-</sup><br/>NH<sub>3</sub><sup>+2</sup></b> | 1032.5 | <b>TKTGTT<br/>luA-H<sub>2</sub>O</b>      | 1440.7 | <b>y<sub>13</sub></b>                         |
| 264.2 <sup>+2</sup> | <b>b<sub>5</sub>-H<sub>2</sub>O<sup>+2</sup></b> | 489.3               | <b>TKTGT</b>                        | 746.4                      | <b>TluATT-<br/>H<sub>2</sub>O</b>                                 | 1032.5 | <b>KTGTTI<br/>uAT-<br/>H<sub>2</sub>O</b> | 1448.7 | <b>b<sub>13</sub>-H<sub>2</sub>O</b>          |
| 264.7 <sup>+2</sup> | <b>b<sub>5</sub>-NH<sub>3</sub><sup>+2</sup></b> | 489.3               | <b>TTKTG</b>                        | 746.4                      | <b>TTluAT-<br/>H<sub>2</sub>O</b>                                 | 1033.5 | <b>TKTGTT<br/>luA-NH<sub>3</sub></b>      | 1449.7 | <b>b<sub>13</sub>-NH<sub>3</sub></b>          |
| 269.2               | <b>KTG-<br/>H<sub>2</sub>O</b>                   | 489.3               | <b>KTGTT</b>                        | 748.4 <sup>+2</sup>        | <b>a<sub>14</sub><sup>+2</sup></b>                                | 1033.5 | <b>KTGTTI<br/>uAT-<br/>NH<sub>3</sub></b> | 1466.8 | <b>b<sub>13</sub></b>                         |
| 270.1               | <b>KTG-<br/>NH<sub>3</sub></b>                   | 491.2               | <b>Tlu</b>                          | 750.4                      | <b>TGTTlu</b>                                                     | 1034.5 | <b>TluATT<br/>GNV</b>                     | 1478.8 | <b>a<sub>14</sub>-NH<sub>3</sub></b>          |
| 271.1               | <b>GNV</b>                                       | 500.3               | <b>a<sub>5</sub>-NH<sub>3</sub></b> | 753.4 <sup>+2</sup>        | <b>b<sub>14</sub><sup>-</sup><br/>H<sub>2</sub>O<sup>+2</sup></b> | 1036.5 | <b>TTluAT<br/>TGN</b>                     | 1494.8 | <b>TKTGTT<br/>luATTG<br/>NV-28</b>            |
| 273.1               | <b>TGN</b>                                       | 501.2               | <b>y<sub>5</sub>-H<sub>2</sub>O</b> | 753.9 <sup>+2</sup>        | <b>b<sub>14</sub><sup>-</sup><br/>NH<sub>3</sub><sup>+2</sup></b> | 1050.5 | <b>TKTGTT<br/>luA</b>                     | 1495.8 | <b>a<sub>14</sub></b>                         |

|                     |                                                  |       |                                     |                     |                                                                   |        |                                            |        |                                                      |
|---------------------|--------------------------------------------------|-------|-------------------------------------|---------------------|-------------------------------------------------------------------|--------|--------------------------------------------|--------|------------------------------------------------------|
| 273.2 <sup>+2</sup> | <b>b<sub>5</sub><sup>+2</sup></b>                | 502.2 | <b>y<sub>5</sub>-NH<sub>3</sub></b> | 759.4               | <b>a<sub>8</sub>-NH<sub>3</sub></b>                               | 1050.5 | <b>KTGTTI<br/>uAT</b>                      | 1496.7 | <b>TTKTGT<br/>TluATT<br/>GN-28</b>                   |
| 274.1               | <b>ATT</b>                                       | 516.3 | <b>ATTGN<br/>V-28</b>               | 762.4 <sup>+2</sup> | <b>b<sub>14</sub><sup>+2</sup></b>                                | 1052.5 | <b>TGTTlu<br/>ATTG-<br/>28</b>             | 1504.7 | <b>TKTGTT<br/>luATTG<br/>NV-H<sub>2</sub>O</b>       |
| 279.2 <sup>+2</sup> | <b>a<sub>6</sub>-NH<sub>3</sub><sup>+2</sup></b> | 517.3 | <b>a<sub>5</sub></b>                | 764.4               | <b>TluATT</b>                                                     | 1052.5 | <b>TTKTGT<br/>Tlu-28</b>                   | 1505.7 | <b>TKTGTT<br/>luATTG<br/>NV-NH<sub>3</sub></b>       |
| 287.2               | <b>KTG</b>                                       | 519.2 | <b>y<sub>5</sub></b>                | 764.4               | <b>TTluAT</b>                                                     | 1062.5 | <b>TGTTlu<br/>ATTG-<br/>H<sub>2</sub>O</b> | 1505.8 | <b>b<sub>14</sub>-H<sub>2</sub>O</b>                 |
| 287.7 <sup>+2</sup> | <b>a<sub>6</sub><sup>+2</sup></b>                | 522.2 | <b>uATT-<br/>28</b>                 | 775.9 <sup>+2</sup> | <b>y<sub>14</sub><sup>-</sup><br/>H<sub>2</sub>O<sup>+2</sup></b> | 1062.5 | <b>y<sub>9</sub>-H<sub>2</sub>O</b>        | 1506.7 | <b>TTKTGT<br/>TluATT<br/>GN-H<sub>2</sub>O</b>       |
| 288.2               | <b>a<sub>3</sub></b>                             | 526.3 | <b>ATTGN<br/>V-H<sub>2</sub>O</b>   | 776.4 <sup>+2</sup> | <b>y<sub>14</sub><sup>-</sup><br/>NH<sub>3</sub><sup>+2</sup></b> | 1062.5 | <b>TTKTGT<br/>Tlu-H<sub>2</sub>O</b>       | 1506.8 | <b>b<sub>14</sub>-NH<sub>3</sub></b>                 |
| 288.2               | <b>TTI-28</b>                                    | 527.2 | <b>ATTGN<br/>V-NH<sub>3</sub></b>   | 776.5               | <b>a<sub>8</sub></b>                                              | 1063.5 | <b>y<sub>9</sub>-NH<sub>3</sub></b>        | 1507.7 | <b>TTKTGT<br/>TluATT<br/>GN-NH<sub>3</sub></b>       |
| 292.7 <sup>+2</sup> | <b>b<sub>6</sub>-H<sub>2</sub>O<sup>+2</sup></b> | 527.3 | <b>b<sub>5</sub>-H<sub>2</sub>O</b> | 776.5               | <b>TTKTGT<br/>TI-28</b>                                           | 1063.5 | <b>TTKTGT<br/>Tlu-NH<sub>3</sub></b>       | 1522.8 | <b>TKTGTT<br/>luATTG<br/>NV</b>                      |
| 293.2 <sup>+2</sup> | <b>b<sub>6</sub>-NH<sub>3</sub><sup>+2</sup></b> | 528.3 | <b>b<sub>5</sub>-NH<sub>3</sub></b> | 784.9 <sup>+2</sup> | <b>y<sub>14</sub><sup>+2</sup></b>                                | 1065.5 | <b>GTTluA<br/>TTGN-<br/>28</b>             | 1523.8 | <b>b<sub>14</sub></b>                                |
| 298.2               | <b>b<sub>3</sub>-H<sub>2</sub>O</b>              | 532.2 | <b>uATT-<br/>H<sub>2</sub>O</b>     | 786.4               | <b>b<sub>8</sub>-H<sub>2</sub>O</b>                               | 1075.5 | <b>GTTluA<br/>TTGN-<br/>H<sub>2</sub>O</b> | 1524.7 | <b>TTKTGT<br/>TluATT<br/>GN</b>                      |
| 298.2               | <b>TTI-H<sub>2</sub>O</b>                        | 534.3 | <b>luAT-28</b>                      | 786.4               | <b>TTKTGT<br/>TI-H<sub>2</sub>O</b>                               | 1076.5 | <b>GTTluA<br/>TTGN-<br/>NH<sub>3</sub></b> | 1550.8 | <b>y<sub>14</sub>-H<sub>2</sub>O</b>                 |
| 301.7 <sup>+2</sup> | <b>b<sub>6</sub><sup>+2</sup></b>                | 534.3 | <b>TluA-28</b>                      | 787.4               | <b>TTKTGT<br/>TI-NH<sub>3</sub></b>                               | 1080.5 | <b>TGTTlu<br/>ATTG</b>                     | 1551.7 | <b>y<sub>14</sub>-NH<sub>3</sub></b>                 |
| 303.2               | <b>ATTG-<br/>28</b>                              | 544.3 | <b>luAT-<br/>H<sub>2</sub>O</b>     | 787.4               | <b>b<sub>8</sub>-NH<sub>3</sub></b>                               | 1080.5 | <b>y<sub>9</sub></b>                       | 1568.8 | <b>y<sub>14</sub></b>                                |
| 303.2               | <b>TKT-28</b>                                    | 544.3 | <b>TluA-<br/>H<sub>2</sub>O</b>     | 792.4               | <b>uATTG<br/>NV-28</b>                                            | 1080.5 | <b>TTKTGT<br/>Tlu</b>                      | 1592.8 | <b>a<sub>15</sub>-NH<sub>3</sub></b>                 |
| 303.2               | <b>TTK-28</b>                                    | 544.3 | <b>ATTGN<br/>V</b>                  | 793.4               | <b>TluATT<br/>G-28</b>                                            | 1093.5 | <b>GTTluA<br/>TTGN</b>                     | 1595.8 | <b>TTKTGT<br/>TluATT<br/>GNV-28</b>                  |
| 313.2               | <b>ATTG-<br/>H<sub>2</sub>O</b>                  | 545.3 | <b>b<sub>5</sub></b>                | 793.4               | <b>GTTluA<br/>T-28</b>                                            | 1107.6 | <b>TTluAT<br/>TGNV-<br/>28</b>             | 1605.8 | <b>TTKTGT<br/>TluATT<br/>GNV-<br/>H<sub>2</sub>O</b> |
| 313.2               | <b>TKT-<br/>H<sub>2</sub>O</b>                   | 550.2 | <b>uATT</b>                         | 793.4               | <b>TGTTlu<br/>A-28</b>                                            | 1117.5 | <b>TTluAT<br/>TGNV-<br/>H<sub>2</sub>O</b> | 1606.8 | <b>TTKTGT<br/>TluATT<br/>GNV-<br/>NH<sub>3</sub></b> |
| 313.2               | <b>TTK-<br/>H<sub>2</sub>O</b>                   | 557.3 | <b>a<sub>6</sub>-NH<sub>3</sub></b> | 796.9 <sup>+2</sup> | <b>a<sub>15</sub><sup>-</sup><br/>NH<sub>3</sub><sup>+2</sup></b> | 1118.5 | <b>TTluAT<br/>TGNV-<br/>NH<sub>3</sub></b> | 1609.8 | <b>a<sub>15</sub></b>                                |
| 314.2               | <b>TKT-<br/>NH<sub>3</sub></b>                   | 562.3 | <b>luAT</b>                         | 802.4               | <b>uATTG<br/>NV-H<sub>2</sub>O</b>                                | 1123.6 | <b>TKTGTT<br/>luAT-28</b>                  | 1619.8 | <b>b<sub>15</sub>-H<sub>2</sub>O</b>                 |
| 314.2               | <b>TTK-<br/>NH<sub>3</sub></b>                   | 562.3 | <b>TluA</b>                         | 803.3               | <b>uATTG<br/>NV-NH<sub>3</sub></b>                                | 1123.6 | <b>KTGTTI<br/>uATT-<br/>28</b>             | 1620.8 | <b>b<sub>15</sub>-NH<sub>3</sub></b>                 |

|                     |                                                  |                     |                                                        |                     |                                                        |        |                                             |        |                                      |
|---------------------|--------------------------------------------------|---------------------|--------------------------------------------------------|---------------------|--------------------------------------------------------|--------|---------------------------------------------|--------|--------------------------------------|
| 316.2               | <b>b<sub>3</sub></b>                             | 562.3               | <b>TTKTGT<br/>-28</b>                                  | 803.4               | <b>TluATT<br/>G-H<sub>2</sub>O</b>                     | 1123.6 | <b>TTKTGT<br/>TluA-28</b>                   | 1623.8 | <b>TTKTGT<br/>TluATT<br/>GNV</b>     |
| 316.2               | <b>TTI</b>                                       | 562.3               | <b>TKTGTT<br/>-28</b>                                  | 803.4               | <b>TGTTlu<br/>A-H<sub>2</sub>O</b>                     | 1133.6 | <b>KTGTTI<br/>uATT-<br/>H<sub>2</sub>O</b>  | 1637.8 | <b>b<sub>15</sub></b>                |
| 320.1               | <b>uA-28</b>                                     | 564.3               | <b>TTlu-28</b>                                         | 803.4               | <b>GTTluA<br/>T-H<sub>2</sub>O</b>                     | 1133.6 | <b>TKTGTT<br/>luAT-<br/>H<sub>2</sub>O</b>  | 1651.8 | <b>y<sub>15</sub>-H<sub>2</sub>O</b> |
| 329.7 <sup>+2</sup> | <b>a<sub>7</sub>-NH<sub>3</sub><sup>+2</sup></b> | 572.3               | <b>TTKTGT<br/>-H<sub>2</sub>O</b>                      | 804.4               | <b>TTKTGT<br/>TI</b>                                   | 1133.6 | <b>TTKTGT<br/>TluA-<br/>H<sub>2</sub>O</b>  | 1652.8 | <b>y<sub>15</sub>-NH<sub>3</sub></b> |
| 331.2               | <b>ATTG</b>                                      | 572.3               | <b>TKTGTT<br/>-H<sub>2</sub>O</b>                      | 804.4               | <b>b<sub>8</sub></b>                                   | 1134.6 | <b>KTGTTI<br/>uATT-<br/>NH<sub>3</sub></b>  | 1655.8 | <b>b<sub>15</sub>+H<sub>2</sub>O</b> |
| 331.2               | <b>TKT</b>                                       | 573.3               | <b>TKTGTT<br/>-NH<sub>3</sub></b>                      | 805.4 <sup>+2</sup> | <b>a<sub>15</sub><sup>+2</sup></b>                     | 1134.6 | <b>TKTGTT<br/>luAT-<br/>NH<sub>3</sub></b>  | 1669.8 | <b>y<sub>15</sub></b>                |
| 331.2               | <b>TTK</b>                                       | 573.3               | <b>TTKTGT<br/>-NH<sub>3</sub></b>                      | 806.4               | <b>luATTG<br/>N-28</b>                                 | 1134.6 | <b>TTKTGT<br/>TluA-<br/>NH<sub>3</sub></b>  | 1691.9 | <b>a<sub>16</sub>-NH<sub>3</sub></b> |
| 333.2               | <b>TGTT-<br/>28</b>                              | 574.3               | <b>TTlu-<br/>H<sub>2</sub>O</b>                        | 810.4 <sup>+2</sup> | <b>b<sub>15</sub>-<br/>H<sub>2</sub>O<sup>+2</sup></b> | 1135.5 | <b>TTluAT<br/>TGNV</b>                      | 1708.9 | <b>a<sub>16</sub></b>                |
| 338.2 <sup>+2</sup> | <b>a<sub>7</sub><sup>+2</sup></b>                | 574.4               | <b>a<sub>6</sub></b>                                   | 810.9 <sup>+2</sup> | <b>b<sub>15</sub>-<br/>NH<sub>3</sub><sup>+2</sup></b> | 1148.6 | <b>a<sub>10</sub>-NH<sub>3</sub></b>        | 1718.9 | <b>b<sub>16</sub>-H<sub>2</sub>O</b> |
| 343.2               | <b>y<sub>3</sub>-H<sub>2</sub>O</b>              | 574.4               | <b>KTGTTI-<br/>28</b>                                  | 816.4               | <b>luATTG<br/>N-H<sub>2</sub>O</b>                     | 1151.6 | <b>KTGTTI<br/>uATT</b>                      | 1719.9 | <b>b<sub>16</sub>-NH<sub>3</sub></b> |
| 343.2               | <b>TGTT-<br/>H<sub>2</sub>O</b>                  | 574.8 <sup>+2</sup> | <b>a<sub>10</sub>-<br/>NH<sub>3</sub><sup>+2</sup></b> | 817.4               | <b>luATTG<br/>N-NH<sub>3</sub></b>                     | 1151.6 | <b>TKTGTT<br/>luAT</b>                      | 1736.9 | <b>b<sub>16</sub></b>                |
| 343.2 <sup>+2</sup> | <b>b<sub>7</sub>-H<sub>2</sub>O<sup>+2</sup></b> | 579.3               | <b>uATTG-<br/>28</b>                                   | 819.4 <sup>+2</sup> | <b>b<sub>15</sub><sup>+2</sup></b>                     | 1151.6 | <b>TTKTGT<br/>TluA</b>                      | 1752.8 | <b>y<sub>16</sub>-H<sub>2</sub>O</b> |
| 343.7 <sup>+2</sup> | <b>b<sub>7</sub>-NH<sub>3</sub><sup>+2</sup></b> | 583.3 <sup>+2</sup> | <b>a<sub>10</sub><sup>+2</sup></b>                     | 820.4               | <b>uATTG<br/>NV</b>                                    | 1163.5 | <b>y<sub>10</sub>-H<sub>2</sub>O</b>        | 1753.8 | <b>y<sub>16</sub>-NH<sub>3</sub></b> |
| 344.1               | <b>y<sub>3</sub>-NH<sub>3</sub></b>              | 584.3               | <b>b<sub>6</sub>-H<sub>2</sub>O</b>                    | 821.4               | <b>TluATT<br/>G</b>                                    | 1164.5 | <b>y<sub>10</sub>-NH<sub>3</sub></b>        | 1754.9 | <b>b<sub>16</sub>+H<sub>2</sub>O</b> |
| 344.2               | <b>TGNV-<br/>28</b>                              | 584.3               | <b>KTGTTI-<br/>H<sub>2</sub>O</b>                      | 821.4               | <b>GTTluA<br/>T</b>                                    | 1164.6 | <b>GTTluA<br/>TTGNV-<br/>28</b>             | 1770.9 | <b>y<sub>16</sub></b>                |
| 345.2               | <b>GTTI-28</b>                                   | 585.3               | <b>b<sub>6</sub>-NH<sub>3</sub></b>                    | 821.4               | <b>TGTTlu<br/>A</b>                                    | 1165.6 | <b>a<sub>10</sub></b>                       | 1865.9 | <b>MH-H<sub>2</sub>O</b>             |
| 346.2               | <b>TTGN-<br/>28</b>                              | 585.3               | <b>KTGTTI-<br/>NH<sub>3</sub></b>                      | 826.4 <sup>+2</sup> | <b>y<sub>15</sub>-<br/>H<sub>2</sub>O<sup>+2</sup></b> | 1166.6 | <b>TGTTlu<br/>ATTGN-<br/>28</b>             | 1866.9 | <b>MH-NH<sub>3</sub></b>             |
| 348.1               | <b>uA</b>                                        | 588.3 <sup>+2</sup> | <b>b<sub>10</sub>-<br/>H<sub>2</sub>O<sup>+2</sup></b> | 826.9 <sup>+2</sup> | <b>y<sub>15</sub>-<br/>NH<sub>3</sub><sup>+2</sup></b> | 1174.6 | <b>GTTluA<br/>TTGNV-<br/>H<sub>2</sub>O</b> | 1883.9 | <b>MH</b>                            |
| 352.2 <sup>+2</sup> | <b>b<sub>7</sub><sup>+2</sup></b>                | 588.8 <sup>+2</sup> | <b>b<sub>10</sub>-<br/>NH<sub>3</sub><sup>+2</sup></b> | 828.4 <sup>+2</sup> | <b>b<sub>15</sub>+H<sub>2</sub>O<br/><sup>+2</sup></b> | 1175.5 | <b>GTTluATTGNV-<br/>NH<sub>3</sub></b>      |        |                                      |

# ITTKTGTTINATTGNVE

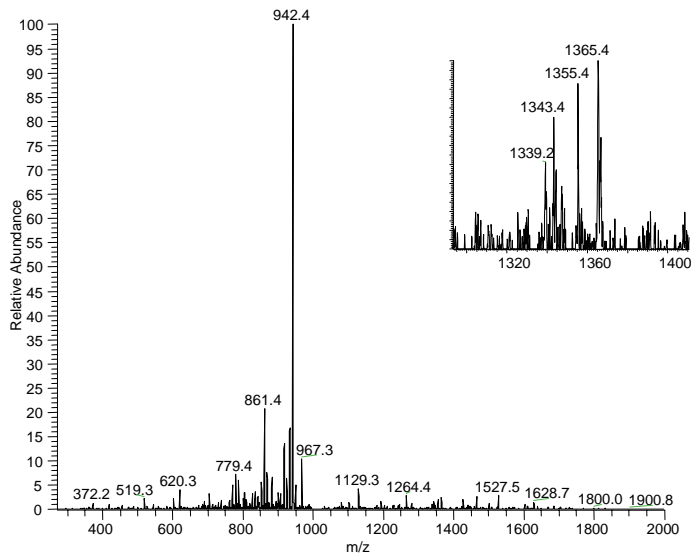

|       |                                  |       |                       |                     |                                                            |                     |                                                            |        |                                   |
|-------|----------------------------------|-------|-----------------------|---------------------|------------------------------------------------------------|---------------------|------------------------------------------------------------|--------|-----------------------------------|
| 72.1  | V                                | 355.2 | GTTI-H <sub>2</sub> O | 674.3               | TTKTGT T-NH <sub>3</sub>                                   | 958.5 <sup>+2</sup> | y <sub>16</sub> <sup>-</sup> NH <sub>3</sub> <sup>+2</sup> | 1337.7 | b <sub>10</sub> -H <sub>2</sub> O |
| 74.1  | T                                | 356.2 | TTGN-H <sub>2</sub> O | 675.4               | a <sub>7</sub>                                             | 959.0 <sup>+2</sup> | b <sub>16</sub> +H <sub>2</sub> O <sup>+2</sup>            | 1338.6 | TGTTIv ATTGN-H <sub>2</sub> O     |
| 84.1  | K                                | 357.1 | TTGN-NH <sub>3</sub>  | 675.4               | TKTGTT I-28                                                | 964.4               | vATTG NV-H <sub>2</sub> O                                  | 1338.7 | b <sub>10</sub> -NH <sub>3</sub>  |
| 86.1  | I                                | 360.2 | TKTG-28               | 678.3 <sup>+2</sup> | b <sub>10</sub> <sup>+2</sup>                              | 965.4               | vATTG NV-NH <sub>3</sub>                                   | 1339.6 | TGTTIv ATTGN-NH <sub>3</sub>      |
| 87.1  | N                                | 360.2 | KTGT-28               | 684.3               | vATT-28                                                    | 965.4               | TIvATT G-H <sub>2</sub> O                                  | 1342.7 | KTGTTI vATTG-28                   |
| 101.1 | K                                | 361.2 | y <sub>3</sub>        | 685.4               | b <sub>7</sub> -H <sub>2</sub> O                           | 965.4               | GTTIvA T-H <sub>2</sub> O                                  | 1343.6 | y <sub>10</sub>                   |
| 102.1 | E                                | 361.2 | TGTT                  | 685.4               | TKTGTT I-H <sub>2</sub> O                                  | 965.4               | TGTTIv A-H <sub>2</sub> O                                  | 1352.6 | KTGTTI vATTG-H <sub>2</sub> O     |
| 126.1 | K                                | 370.2 | TKTG-H <sub>2</sub> O | 686.4               | TKTGTT I-NH <sub>3</sub>                                   | 967.0 <sup>+2</sup> | y <sub>16</sub> <sup>+2</sup>                              | 1353.6 | KTGTTI vATTG-NH <sub>3</sub>      |
| 129.1 | K                                | 370.2 | KTGT-H <sub>2</sub> O | 686.4               | b <sub>7</sub> -NH <sub>3</sub>                            | 968.4               | IvATTG N-28                                                | 1354.6 | GTTIvA TTGNV                      |
| 130.0 | y <sub>1</sub> -H <sub>2</sub> O | 371.2 | TKTG-NH <sub>3</sub>  | 691.3               | y <sub>7</sub>                                             | 978.4               | IvATTG N-H <sub>2</sub> O                                  | 1355.7 | b <sub>10</sub>                   |
| 131.1 | TG-28                            | 371.2 | KTGT-NH <sub>3</sub>  | 691.4 <sup>+2</sup> | a <sub>11</sub> <sup>-</sup> NH <sub>3</sub> <sup>+2</sup> | 979.4               | IvATTG N-NH <sub>3</sub>                                   | 1356.6 | TGTTIv ATTGN                      |
| 131.1 | GT-28                            | 372.2 | TGNV                  | 691.4               | TTKTGT T                                                   | 982.4               | vATTG NV                                                   | 1370.7 | KTGTTI vATTG                      |
| 141.1 | TG-H <sub>2</sub> O              | 373.2 | GTTI                  | 694.3               | vATT-H <sub>2</sub> O                                      | 983.4               | TIvATT G                                                   | 1381.7 | a <sub>11</sub> -NH <sub>3</sub>  |
| 141.1 | GT-H <sub>2</sub> O              | 374.2 | TTGN                  | 696.3               | IvAT-28                                                    | 983.4               | GTTIvA T                                                   | 1386.7 | TKTGTT IvATT-28                   |

|                     |                                                  |                     |                                                  |                            |                                                        |                      |                                            |        |                                              |
|---------------------|--------------------------------------------------|---------------------|--------------------------------------------------|----------------------------|--------------------------------------------------------|----------------------|--------------------------------------------|--------|----------------------------------------------|
| 144.1               | <b>GN-28</b>                                     | 380.2 <sup>+2</sup> | <b>a<sub>8</sub>-NH<sub>3</sub><sup>+2</sup></b> | 696.3                      | <b>TlvA-28</b>                                         | 983.4                | <b>TGTTlv<br/>A</b>                        | 1386.7 | <b>TTKTGT<br/>TlvAT-<br/>28</b>              |
| 145.1               | <b>AT-28</b>                                     | 388.2               | <b>TKTG</b>                                      | 699.9 <sup>+2</sup>        | <b>a<sub>11</sub><sup>+2</sup></b>                     | 996.4                | <b>IvATTG<br/>N</b>                        | 1396.7 | <b>TKTGTT<br/>IvATT-<br/>H<sub>2</sub>O</b>  |
| 148.1               | <b>y<sub>1</sub></b>                             | 388.2               | <b>KTGT</b>                                      | 703.4                      | <b>TKTGTT<br/>I</b>                                    | 999.5                | <b>TTlvAT<br/>T-28</b>                     | 1396.7 | <b>TTKTGT<br/>TlvAT-<br/>H<sub>2</sub>O</b>  |
| 155.0               | <b>GN-NH<sub>3</sub></b>                         | 388.7 <sup>+2</sup> | <b>a<sub>8</sub><sup>+2</sup></b>                | 703.4                      | <b>b<sub>7</sub></b>                                   | 1009.5               | <b>TTlvAT<br/>T-H<sub>2</sub>O</b>         | 1397.7 | <b>TKTGTT<br/>IvATT-<br/>NH<sub>3</sub></b>  |
| 155.1               | <b>AT-H<sub>2</sub>O</b>                         | 393.7 <sup>+2</sup> | <b>b<sub>8</sub>-H<sub>2</sub>O<sup>+2</sup></b> | 704.9 <sup>+2</sup>        | <b>b<sub>11</sub>-<br/>H<sub>2</sub>O<sup>+2</sup></b> | 1012.5               | <b>KTGTTI<br/>v-28</b>                     | 1397.7 | <b>TTKTGT<br/>TlvAT-<br/>NH<sub>3</sub></b>  |
| 159.1               | <b>TG</b>                                        | 394.2 <sup>+2</sup> | <b>b<sub>8</sub>-NH<sub>3</sub><sup>+2</sup></b> | 705.348<br>3 <sup>+2</sup> | <b>b<sub>11</sub>-<br/>NH<sub>3</sub><sup>+2</sup></b> | 1014.5 <sup>+2</sup> | <b>MH-<br/>H<sub>2</sub>O<sup>+2</sup></b> | 1398.7 | <b>a<sub>11</sub></b>                        |
| 159.1               | <b>GT</b>                                        | 399.3               | <b>a<sub>4</sub>-NH<sub>3</sub></b>              | 706.3                      | <b>IvAT-<br/>H<sub>2</sub>O</b>                        | 1015.0 <sup>+2</sup> | <b>MH-<br/>NH<sub>3</sub><sup>+2</sup></b> | 1408.7 | <b>b<sub>11</sub>-H<sub>2</sub>O</b>         |
| 172.1               | <b>GN</b>                                        | 400.2               | <b>y<sub>4</sub>-H<sub>2</sub>O</b>              | 706.3                      | <b>TlvA-<br/>H<sub>2</sub>O</b>                        | 1022.5               | <b>KTGTTI<br/>v-H<sub>2</sub>O</b>         | 1409.7 | <b>b<sub>11</sub>-NH<sub>3</sub></b>         |
| 173.1               | <b>AT</b>                                        | 401.2               | <b>y<sub>4</sub>-NH<sub>3</sub></b>              | 712.3                      | <b>vATT</b>                                            | 1023.5               | <b>KTGTTI<br/>v-NH<sub>3</sub></b>         | 1414.7 | <b>TKTGTT<br/>IvATT</b>                      |
| 175.1               | <b>TT-28</b>                                     | 402.7 <sup>+2</sup> | <b>b<sub>8</sub><sup>+2</sup></b>                | 713.9 <sup>+2</sup>        | <b>b<sub>11</sub><sup>+2</sup></b>                     | 1023.5 <sup>+2</sup> | <b>MH<sup>+2</sup></b>                     | 1414.7 | <b>TTKTGT<br/>TlvAT</b>                      |
| 185.1               | <b>TT-H<sub>2</sub>O</b>                         | 404.3               | <b>TTKT-<br/>28</b>                              | 724.3                      | <b>IvAT</b>                                            | 1027.5               | <b>TTlvAT<br/>T</b>                        | 1426.6 | <b>y<sub>11</sub>-H<sub>2</sub>O</b>         |
| 186.1               | <b>NV-28</b>                                     | 414.2               | <b>TTKT-<br/>H<sub>2</sub>O</b>                  | 724.3                      | <b>TlvA</b>                                            | 1040.5               | <b>KTGTTI<br/>v</b>                        | 1426.7 | <b>b<sub>11</sub></b>                        |
| 187.1               | <b>a<sub>2</sub></b>                             | 415.2               | <b>TTKT-<br/>NH<sub>3</sub></b>                  | 726.3                      | <b>TTlv-28</b>                                         | 1056.5               | <b>TGTTlv<br/>AT-28</b>                    | 1427.6 | <b>y<sub>11</sub>-NH<sub>3</sub></b>         |
| 187.1               | <b>TI-28</b>                                     | 416.3               | <b>a<sub>4</sub></b>                             | 736.3                      | <b>TTlv-<br/>H<sub>2</sub>O</b>                        | 1056.5               | <b>TTlvAT<br/>TG-28</b>                    | 1427.7 | <b>TGTTlv<br/>ATTGN<br/>V-28</b>             |
| 197.1               | <b>NV-NH<sub>3</sub></b>                         | 417.2               | <b>ATTGN-<br/>28</b>                             | 741.3                      | <b>vATTG-<br/>28</b>                                   | 1056.5               | <b>GTTlvA<br/>TT-28</b>                    | 1437.7 | <b>TGTTlv<br/>ATTGN<br/>V-H<sub>2</sub>O</b> |
| 197.1               | <b>b<sub>2</sub>-H<sub>2</sub>O</b>              | 418.2               | <b>y<sub>4</sub></b>                             | 741.874<br>7 <sup>+2</sup> | <b>a<sub>12</sub>-<br/>NH<sub>3</sub><sup>+2</sup></b> | 1066.5               | <b>TGTTlv<br/>AT-H<sub>2</sub>O</b>        | 1438.6 | <b>TGTTlv<br/>ATTGN<br/>V-NH<sub>3</sub></b> |
| 197.1               | <b>TI-H<sub>2</sub>O</b>                         | 426.3               | <b>b<sub>4</sub>-H<sub>2</sub>O</b>              | 750.4 <sup>+2</sup>        | <b>a<sub>12</sub><sup>+2</sup></b>                     | 1066.5               | <b>TTlvAT<br/>TG-H<sub>2</sub>O</b>        | 1443.7 | <b>TKTGTT<br/>IvATTG-<br/>28</b>             |
| 200.1 <sup>+2</sup> | <b>a<sub>4</sub>-NH<sub>3</sub><sup>+2</sup></b> | 427.2               | <b>ATTGN-<br/>H<sub>2</sub>O</b>                 | 751.3                      | <b>vATTG-<br/>H<sub>2</sub>O</b>                       | 1066.5               | <b>GTTlvA<br/>TT-H<sub>2</sub>O</b>        | 1444.7 | <b>y<sub>11</sub></b>                        |
| 202.2               | <b>TK-28</b>                                     | 427.3               | <b>b<sub>4</sub>-NH<sub>3</sub></b>              | 754.3                      | <b>TTlv</b>                                            | 1067.5               | <b>IvATTG<br/>NV-28</b>                    | 1453.7 | <b>TKTGTT<br/>IvATTG-<br/>H<sub>2</sub>O</b> |
| 202.2               | <b>KT-28</b>                                     | 428.2               | <b>ATTGN-<br/>NH<sub>3</sub></b>                 | 755.4 <sup>+2</sup>        | <b>b<sub>12</sub>-<br/>H<sub>2</sub>O<sup>+2</sup></b> | 1069.5               | <b>TlvATT<br/>GN-28</b>                    | 1454.7 | <b>TKTGTT<br/>IvATTG-<br/>NH<sub>3</sub></b> |
| 203.1               | <b>TT</b>                                        | 432.2               | <b>TTKT</b>                                      | 755.9 <sup>+2</sup>        | <b>b<sub>12</sub>-<br/>NH<sub>3</sub><sup>+2</sup></b> | 1077.5               | <b>IvATTG<br/>NV-H<sub>2</sub>O</b>        | 1455.7 | <b>TGTTlv<br/>ATTGN<br/>V</b>                |

|                     |                                                  |                     |                                                  |                     |                                                        |        |                                           |        |                                               |
|---------------------|--------------------------------------------------|---------------------|--------------------------------------------------|---------------------|--------------------------------------------------------|--------|-------------------------------------------|--------|-----------------------------------------------|
| 208.7 <sup>+2</sup> | <b>a<sub>4</sub><sup>+2</sup></b>                | 436.8 <sup>+2</sup> | <b>a<sub>9</sub>-NH<sub>3</sub><sup>+2</sup></b> | 759.4               | <b>a<sub>8</sub>-NH<sub>3</sub></b>                    | 1078.5 | <b>lvATTG<br/>NV-NH<sub>3</sub></b>       | 1456.7 | <b>KTGTTI<br/>vATTG<br/>N-28</b>              |
| 212.1               | <b>TK-H<sub>2</sub>O</b>                         | 444.3               | <b>b<sub>4</sub></b>                             | 764.4 <sup>+2</sup> | <b>b<sub>12</sub><sup>+2</sup></b>                     | 1079.5 | <b>TlvATT<br/>GN-H<sub>2</sub>O</b>       | 1466.7 | <b>KTGTTI<br/>vATTG<br/>N-H<sub>2</sub>O</b>  |
| 212.1               | <b>KT-H<sub>2</sub>O</b>                         | 445.2               | <b>ATTGN</b>                                     | 769.3               | <b>vATTG</b>                                           | 1080.5 | <b>TlvATT<br/>GN-NH<sub>3</sub></b>       | 1467.7 | <b>KTGTTI<br/>vATTG<br/>N-NH<sub>3</sub></b>  |
| 213.1               | <b>TK-NH<sub>3</sub></b>                         | 445.2               | <b>TTGNV-<br/>28</b>                             | 776.5               | <b>a<sub>8</sub></b>                                   | 1083.5 | <b>KTGTTI<br/>vA-28</b>                   | 1471.7 | <b>TKTGT<br/>lvATTG</b>                       |
| 213.1               | <b>KT-NH<sub>3</sub></b>                         | 445.3 <sup>+2</sup> | <b>a<sub>9</sub><sup>+2</sup></b>                | 776.5               | <b>TTKTGT<br/>TI-28</b>                                | 1084.5 | <b>TGTTlv<br/>AT</b>                      | 1482.7 | <b>a<sub>12</sub>-NH<sub>3</sub></b>          |
| 213.6 <sup>+2</sup> | <b>b<sub>4</sub>-H<sub>2</sub>O<sup>+2</sup></b> | 446.3               | <b>TGTTI-<br/>28</b>                             | 783.4               | <b>GTTlv-<br/>28</b>                                   | 1084.5 | <b>TTlvAT<br/>TG</b>                      | 1483.7 | <b>y<sub>12</sub>-H<sub>2</sub>O</b>          |
| 214.1               | <b>NV</b>                                        | 450.3 <sup>+2</sup> | <b>b<sub>9</sub>-H<sub>2</sub>O<sup>+2</sup></b> | 786.4               | <b>TTKTGT<br/>TI-H<sub>2</sub>O</b>                    | 1084.5 | <b>GTTlvA<br/>TT</b>                      | 1484.6 | <b>y<sub>12</sub>-NH<sub>3</sub></b>          |
| 214.1 <sup>+2</sup> | <b>b<sub>4</sub>-NH<sub>3</sub><sup>+2</sup></b> | 450.8 <sup>+2</sup> | <b>b<sub>9</sub>-NH<sub>3</sub><sup>+2</sup></b> | 786.4               | <b>b<sub>8</sub>-H<sub>2</sub>O</b>                    | 1093.5 | <b>KTGTTI<br/>vA-H<sub>2</sub>O</b>       | 1484.7 | <b>KTGTTI<br/>vATTG<br/>N</b>                 |
| 215.1               | <b>b<sub>2</sub></b>                             | 455.2               | <b>TTGNV-<br/>H<sub>2</sub>O</b>                 | 787.4               | <b>b<sub>8</sub>-NH<sub>3</sub></b>                    | 1094.5 | <b>KTGTTI<br/>vA-NH<sub>3</sub></b>       | 1487.7 | <b>TTKTGT<br/>TlvATT-<br/>28</b>              |
| 215.1               | <b>TI</b>                                        | 456.2               | <b>TTGNV-<br/>NH<sub>3</sub></b>                 | 787.4               | <b>TTKTGT<br/>TI-NH<sub>3</sub></b>                    | 1095.5 | <b>lvATTG<br/>NV</b>                      | 1497.7 | <b>TTKTGT<br/>TlvATT-<br/>H<sub>2</sub>O</b>  |
| 222.7 <sup>+2</sup> | <b>b<sub>4</sub><sup>+2</sup></b>                | 456.2               | <b>TGTTI-<br/>H<sub>2</sub>O</b>                 | 792.4 <sup>+2</sup> | <b>a<sub>13</sub>-<br/>NH<sub>3</sub><sup>+2</sup></b> | 1097.5 | <b>TlvATT<br/>GN</b>                      | 1498.7 | <b>TTKTGT<br/>TlvATT-<br/>NH<sub>3</sub></b>  |
| 229.1               | <b>y<sub>2</sub>-H<sub>2</sub>O</b>              | 459.3 <sup>+2</sup> | <b>b<sub>9</sub><sup>+2</sup></b>                | 793.3               | <b>GTTlv-<br/>H<sub>2</sub>O</b>                       | 1111.5 | <b>y<sub>8</sub>-H<sub>2</sub>O</b>       | 1499.8 | <b>a<sub>12</sub></b>                         |
| 230.1               | <b>TK</b>                                        | 461.3               | <b>TKTGT-<br/>28</b>                             | 797.4               | <b>lvATT-<br/>28</b>                                   | 1111.5 | <b>KTGTTI<br/>vA</b>                      | 1501.7 | <b>y<sub>12</sub></b>                         |
| 230.1               | <b>KT</b>                                        | 461.3               | <b>TTKTG-<br/>28</b>                             | 797.4               | <b>TlvAT-<br/>28</b>                                   | 1112.4 | <b>y<sub>8</sub>-NH<sub>3</sub></b>       | 1509.8 | <b>b<sub>12</sub>-H<sub>2</sub>O</b>          |
| 232.1               | <b>TTG-28</b>                                    | 461.3               | <b>KTGTT-<br/>28</b>                             | 797.4               | <b>TTlvA-<br/>28</b>                                   | 1113.5 | <b>GTTlvA<br/>TTG-28</b>                  | 1510.7 | <b>b<sub>12</sub>-NH<sub>3</sub></b>          |
| 232.1               | <b>TGT-28</b>                                    | 471.3               | <b>TKTGT-<br/>H<sub>2</sub>O</b>                 | 800.9 <sup>+2</sup> | <b>a<sub>13</sub><sup>+2</sup></b>                     | 1113.6 | <b>TKTGTT<br/>lv-28</b>                   | 1515.7 | <b>TTKTGT<br/>TlvATT</b>                      |
| 232.1               | <b>GTT-28</b>                                    | 471.3               | <b>TTKTG-<br/>H<sub>2</sub>O</b>                 | 804.4               | <b>TTKTGT<br/>TI</b>                                   | 1123.5 | <b>GTTlvA<br/>TTG-<br/>H<sub>2</sub>O</b> | 1527.8 | <b>b<sub>12</sub></b>                         |
| 242.1               | <b>TTG-<br/>H<sub>2</sub>O</b>                   | 471.3               | <b>KTGTT-<br/>H<sub>2</sub>O</b>                 | 804.4               | <b>b<sub>8</sub></b>                                   | 1123.5 | <b>TKTGTT<br/>lv-H<sub>2</sub>O</b>       | 1544.8 | <b>TTKTGT<br/>TlvATT<br/>G-28</b>             |
| 242.1               | <b>TGT-<br/>H<sub>2</sub>O</b>                   | 472.2               | <b>TKTGT-<br/>NH<sub>3</sub></b>                 | 805.9 <sup>+2</sup> | <b>b<sub>13</sub>-<br/>H<sub>2</sub>O<sup>+2</sup></b> | 1124.5 | <b>TKTGTT<br/>lv-NH<sub>3</sub></b>       | 1554.7 | <b>TTKTGT<br/>TlvATT<br/>G-H<sub>2</sub>O</b> |
| 242.1               | <b>GTT-<br/>H<sub>2</sub>O</b>                   | 472.2               | <b>TTKTG-<br/>NH<sub>3</sub></b>                 | 806.4 <sup>+2</sup> | <b>b<sub>13</sub>-<br/>NH<sub>3</sub><sup>+2</sup></b> | 1129.5 | <b>y<sub>8</sub></b>                      | 1555.7 | <b>TTKTGT<br/>TlvATT<br/>G-NH<sub>3</sub></b> |
| 243.1               | <b>GNV-28</b>                                    | 472.2               | <b>KTGTT-<br/>NH<sub>3</sub></b>                 | 807.4               | <b>lvATT-<br/>H<sub>2</sub>O</b>                       | 1141.5 | <b>GTTlvA<br/>TTG</b>                     | 1555.8 | <b>KTGTTI<br/>vATTG<br/>NV-28</b>             |



|                     |                                                  |       |                                     |                     |                                                   |        |                                  |        |                                        |
|---------------------|--------------------------------------------------|-------|-------------------------------------|---------------------|---------------------------------------------------|--------|----------------------------------|--------|----------------------------------------|
| 245.1               | <b>TGN-28</b>                                    | 473.2 | <b>TTGNV</b>                        | 807.4               | <b>TivAT-H<sub>2</sub>O</b>                       | 1141.5 | <b>TKTGTT Iv</b>                 | 1557.7 | <b>TKTGTT IvATTG N-28</b>              |
| 246.1               | <b>ATT-28</b>                                    | 474.3 | <b>TGTTI</b>                        | 807.4               | <b>TTivA-H<sub>2</sub>O</b>                       | 1157.5 | <b>TGTTIv ATT-28</b>             | 1565.8 | <b>KTGTTI vATTG NV-H<sub>2</sub>O</b>  |
| 247.1               | <b>y<sub>2</sub></b>                             | 482.2 | <b>vA-28</b>                        | 811.4               | <b>GTTIv</b>                                      | 1167.5 | <b>TGTTIv ATT-H<sub>2</sub>O</b> | 1566.7 | <b>KTGTTI vATTG NV-NH<sub>3</sub></b>  |
| 250.7 <sup>+2</sup> | <b>a<sub>5</sub>-NH<sub>3</sub><sup>+2</sup></b> | 489.3 | <b>TKTGT</b>                        | 814.9 <sup>+2</sup> | <b>b<sub>13</sub><sup>+2</sup></b>                | 1168.6 | <b>TivATT GNV-28</b>             | 1567.7 | <b>TKTGTT IvATTG N-H<sub>2</sub>O</b>  |
| 254.1               | <b>GNV-NH<sub>3</sub></b>                        | 489.3 | <b>TTKTG</b>                        | 820.9 <sup>+2</sup> | <b>a<sub>14</sub>-NH<sub>3</sub><sup>+2</sup></b> | 1170.5 | <b>TTivAT TGN-28</b>             | 1568.7 | <b>TKTGTT IvATTG N-NH<sub>3</sub></b>  |
| 255.1               | <b>TGN-H<sub>2</sub>O</b>                        | 489.3 | <b>KTGTT</b>                        | 825.4               | <b>IvATT</b>                                      | 1178.5 | <b>TivATT GNV-H<sub>2</sub>O</b> | 1572.7 | <b>TTKTGT TivATT G</b>                 |
| 256.1               | <b>TGN-NH<sub>3</sub></b>                        | 500.3 | <b>a<sub>5</sub>-NH<sub>3</sub></b> | 825.4               | <b>TivAT</b>                                      | 1179.5 | <b>TivATT GNV-NH<sub>3</sub></b> | 1583.8 | <b>KTGTTI vATTG NV</b>                 |
| 256.1               | <b>ATT-H<sub>2</sub>O</b>                        | 501.2 | <b>y<sub>5</sub>-H<sub>2</sub>O</b> | 825.4               | <b>TTivA</b>                                      | 1180.5 | <b>TTivAT TGN-H<sub>2</sub>O</b> | 1583.8 | <b>a<sub>13</sub>-NH<sub>3</sub></b>   |
| 259.2 <sup>+2</sup> | <b>a<sub>5</sub><sup>+2</sup></b>                | 502.2 | <b>y<sub>5</sub>-NH<sub>3</sub></b> | 829.4 <sup>+2</sup> | <b>a<sub>14</sub><sup>+2</sup></b>                | 1181.5 | <b>TTivAT TGN-NH<sub>3</sub></b> | 1584.7 | <b>y<sub>13</sub>-H<sub>2</sub>O</b>   |
| 259.2               | <b>KTG-28</b>                                    | 510.2 | <b>vA</b>                           | 834.4 <sup>+2</sup> | <b>b<sub>14</sub>-H<sub>2</sub>O<sup>+2</sup></b> | 1184.6 | <b>KTGTTI vAT-28</b>             | 1585.7 | <b>y<sub>13</sub>-NH<sub>3</sub></b>   |
| 260.1               | <b>TTG</b>                                       | 516.3 | <b>ATTGN V-28</b>                   | 834.9 <sup>+2</sup> | <b>b<sub>14</sub>-NH<sub>3</sub><sup>+2</sup></b> | 1184.6 | <b>TKTGTT IvA-28</b>             | 1585.7 | <b>TKTGTT IvATTG N</b>                 |
| 260.1               | <b>TGT</b>                                       | 517.3 | <b>a<sub>5</sub></b>                | 843.4 <sup>+2</sup> | <b>b<sub>14</sub><sup>+2</sup></b>                | 1185.5 | <b>TGTTIv ATT</b>                | 1600.8 | <b>a<sub>13</sub></b>                  |
| 260.1               | <b>GTT</b>                                       | 519.2 | <b>y<sub>5</sub></b>                | 854.4               | <b>IvATTG-28</b>                                  | 1194.6 | <b>KTGTTI vAT-H<sub>2</sub>O</b> | 1602.7 | <b>y<sub>13</sub></b>                  |
| 264.2 <sup>+2</sup> | <b>b<sub>5</sub>-H<sub>2</sub>O<sup>+2</sup></b> | 524.2 | <b>Iv-28</b>                        | 854.4               | <b>GTTIvA-28</b>                                  | 1194.6 | <b>TKTGTT IvA-H<sub>2</sub>O</b> | 1610.8 | <b>b<sub>13</sub>-H<sub>2</sub>O</b>   |
| 264.7 <sup>+2</sup> | <b>b<sub>5</sub>-NH<sub>3</sub><sup>+2</sup></b> | 526.3 | <b>ATTGN V-H<sub>2</sub>O</b>       | 855.4               | <b>vATTG N-28</b>                                 | 1195.6 | <b>KTGTTI vAT-NH<sub>3</sub></b> | 1611.8 | <b>b<sub>13</sub>-NH<sub>3</sub></b>   |
| 269.2               | <b>KTG-H<sub>2</sub>O</b>                        | 527.2 | <b>ATTGN V-NH<sub>3</sub></b>       | 856.9 <sup>+2</sup> | <b>y<sub>14</sub>-H<sub>2</sub>O<sup>+2</sup></b> | 1195.6 | <b>TKTGTT IvA-NH<sub>3</sub></b> | 1628.8 | <b>b<sub>13</sub></b>                  |
| 270.1               | <b>KTG-NH<sub>3</sub></b>                        | 527.3 | <b>b<sub>5</sub>-H<sub>2</sub>O</b> | 857.4 <sup>+2</sup> | <b>y<sub>14</sub>-NH<sub>3</sub><sup>+2</sup></b> | 1196.6 | <b>TivATT GNV</b>                | 1640.8 | <b>a<sub>14</sub>-NH<sub>3</sub></b>   |
| 271.1               | <b>GNV</b>                                       | 528.3 | <b>b<sub>5</sub>-NH<sub>3</sub></b> | 864.4               | <b>IvATTG-H<sub>2</sub>O</b>                      | 1198.5 | <b>TTivAT TGN</b>                | 1656.8 | <b>TKTGTT IvATTG NV-28</b>             |
| 273.1               | <b>TGN</b>                                       | 544.3 | <b>ATTGN V</b>                      | 864.4               | <b>GTTIvA-H<sub>2</sub>O</b>                      | 1212.6 | <b>TKTGTT IvA</b>                | 1657.8 | <b>a<sub>14</sub></b>                  |
| 273.2 <sup>+2</sup> | <b>b<sub>5</sub><sup>+2</sup></b>                | 545.3 | <b>b<sub>5</sub></b>                | 865.3               | <b>vATTG N-H<sub>2</sub>O</b>                     | 1212.6 | <b>KTGTTI vAT</b>                | 1658.8 | <b>TTKTGT TivATT GN-28</b>             |
| 274.1               | <b>ATT</b>                                       | 552.2 | <b>Iv</b>                           | 865.9 <sup>+2</sup> | <b>y<sub>14</sub><sup>+2</sup></b>                | 1214.6 | <b>TGTTIv ATTG-28</b>            | 1666.8 | <b>TKTGTT IvATTG NV-H<sub>2</sub>O</b> |

|                     |                                                  |       |                                     |                        |                                                   |        |                                     |        |                                         |
|---------------------|--------------------------------------------------|-------|-------------------------------------|------------------------|---------------------------------------------------|--------|-------------------------------------|--------|-----------------------------------------|
| 279.2 <sup>+2</sup> | <b>a<sub>6</sub>-NH<sub>3</sub><sup>+2</sup></b> | 557.3 | <b>a<sub>6</sub>-NH<sub>3</sub></b> | 866.3                  | <b>vATTG N-NH<sub>3</sub></b>                     | 1214.6 | <b>TTKTGT Tlv-28</b>                | 1667.8 | <b>TKTGTT IvATTG NV-NH<sub>3</sub></b>  |
| 287.2               | <b>KTG</b>                                       | 562.3 | <b>TKTGTT -28</b>                   | 872.5                  | <b>a<sub>9</sub>-NH<sub>3</sub></b>               | 1224.5 | <b>y<sub>9</sub>-H<sub>2</sub>O</b> | 1667.8 | <b>b<sub>14</sub>-H<sub>2</sub>O</b>    |
| 287.7 <sup>+2</sup> | <b>a<sub>6</sub><sup>+2</sup></b>                | 562.3 | <b>TTKTGT -28</b>                   | 877.9 <sup>+2</sup>    | <b>a<sub>15</sub>-NH<sub>3</sub><sup>+2</sup></b> | 1224.5 | <b>TGTTIv ATTG-H<sub>2</sub>O</b>   | 1668.8 | <b>TTKTGT TlvATT GN-H<sub>2</sub>O</b>  |
| 288.2               | <b>a<sub>3</sub></b>                             | 572.3 | <b>TKTGTT -H<sub>2</sub>O</b>       | 882.4                  | <b>IvATTG</b>                                     | 1224.6 | <b>TTKTGT Tlv-H<sub>2</sub>O</b>    | 1668.8 | <b>b<sub>14</sub>-NH<sub>3</sub></b>    |
| 288.2               | <b>TTI-28</b>                                    | 572.3 | <b>TTKTGT -H<sub>2</sub>O</b>       | 882.4                  | <b>GTTIvA</b>                                     | 1225.5 | <b>y<sub>9</sub>-NH<sub>3</sub></b> | 1669.8 | <b>TTKTGT TlvATT GN-NH<sub>3</sub></b>  |
| 292.7 <sup>+2</sup> | <b>b<sub>6</sub>-H<sub>2</sub>O<sup>+2</sup></b> | 573.3 | <b>TKTGTT -NH<sub>3</sub></b>       | 883.4                  | <b>vATTG N</b>                                    | 1225.6 | <b>TTKTGT Tlv-NH<sub>3</sub></b>    | 1684.8 | <b>TKTGTT IvATTG NV</b>                 |
| 293.2 <sup>+2</sup> | <b>b<sub>6</sub>-NH<sub>3</sub><sup>+2</sup></b> | 573.3 | <b>TTKTGT -NH<sub>3</sub></b>       | 884.4                  | <b>TGTTIv-28</b>                                  | 1227.6 | <b>GTTIvA TTGN-28</b>               | 1685.8 | <b>b<sub>14</sub></b>                   |
| 298.2               | <b>b<sub>3</sub>-H<sub>2</sub>O</b>              | 574.4 | <b>a<sub>6</sub></b>                | 886.4440 <sup>+2</sup> | <b>a<sub>15</sub><sup>+2</sup></b>                | 1237.5 | <b>GTTIvA TTGN-H<sub>2</sub>O</b>   | 1686.8 | <b>TTKTGT TlvATT GN</b>                 |
| 298.2               | <b>TTI-H<sub>2</sub>O</b>                        | 574.4 | <b>KTGTTI-28</b>                    | 889.5                  | <b>a<sub>9</sub></b>                              | 1238.5 | <b>GTTIvA TTGN-NH<sub>3</sub></b>   | 1712.8 | <b>y<sub>14</sub>-H<sub>2</sub>O</b>    |
| 301.7 <sup>+2</sup> | <b>b<sub>6</sub><sup>+2</sup></b>                | 583.2 | <b>vAT-28</b>                       | 891.4 <sup>+2</sup>    | <b>b<sub>15</sub>-H<sub>2</sub>O<sup>+2</sup></b> | 1242.6 | <b>TGTTIv ATTG</b>                  | 1713.8 | <b>y<sub>14</sub>-NH<sub>3</sub></b>    |
| 303.2               | <b>ATTG-28</b>                                   | 584.3 | <b>b<sub>6</sub>-H<sub>2</sub>O</b> | 891.9 <sup>+2</sup>    | <b>b<sub>15</sub>-NH<sub>3</sub><sup>+2</sup></b> | 1242.6 | <b>y<sub>9</sub></b>                | 1730.8 | <b>y<sub>14</sub></b>                   |
| 303.2               | <b>TKT-28</b>                                    | 584.3 | <b>KTGTTI-H<sub>2</sub>O</b>        | 894.4                  | <b>TGTTIv-H<sub>2</sub>O</b>                      | 1242.6 | <b>TTKTGT Tlv</b>                   | 1754.9 | <b>a<sub>15</sub>-NH<sub>3</sub></b>    |
| 303.2               | <b>TTK-28</b>                                    | 585.3 | <b>b<sub>6</sub>-NH<sub>3</sub></b> | 898.4                  | <b>TlvATT-28</b>                                  | 1255.6 | <b>GTTIvA TTGN</b>                  | 1757.9 | <b>TTKTGT TlvATT GNV-28</b>             |
| 313.2               | <b>ATTG-H<sub>2</sub>O</b>                       | 585.3 | <b>KTGTTI-NH<sub>3</sub></b>        | 898.4                  | <b>TTivAT-28</b>                                  | 1269.6 | <b>TTivAT TGNV-28</b>               | 1767.8 | <b>TTKTGT TlvATT GNV-H<sub>2</sub>O</b> |
| 313.2               | <b>TKT-H<sub>2</sub>O</b>                        | 590.3 | <b>TKTGTT</b>                       | 899.5                  | <b>b<sub>9</sub>-H<sub>2</sub>O</b>               | 1279.6 | <b>TTivAT TGNV-H<sub>2</sub>O</b>   | 1768.8 | <b>TTKTGT TlvATT GNV-NH<sub>3</sub></b> |
| 313.2               | <b>TTK-H<sub>2</sub>O</b>                        | 590.3 | <b>TTKTGT</b>                       | 900.4 <sup>+2</sup>    | <b>b<sub>15</sub><sup>+2</sup></b>                | 1280.6 | <b>TTivAT TGNV-NH<sub>3</sub></b>   | 1771.9 | <b>a<sub>15</sub></b>                   |
| 314.2               | <b>TKT-NH<sub>3</sub></b>                        | 593.2 | <b>vAT-H<sub>2</sub>O</b>           | 900.5                  | <b>b<sub>9</sub>-NH<sub>3</sub></b>               | 1285.6 | <b>KTGTTI vATT-28</b>               | 1781.9 | <b>b<sub>15</sub>-H<sub>2</sub>O</b>    |
| 314.2               | <b>TTK-NH<sub>3</sub></b>                        | 595.3 | <b>IvA-28</b>                       | 907.4 <sup>+2</sup>    | <b>y<sub>15</sub>-H<sub>2</sub>O<sup>+2</sup></b> | 1285.6 | <b>TKTGTT IvAT-28</b>               | 1782.8 | <b>b<sub>15</sub>-NH<sub>3</sub></b>    |
| 316.2               | <b>b<sub>3</sub></b>                             | 602.3 | <b>y<sub>6</sub>-H<sub>2</sub>O</b> | 907.9 <sup>+2</sup>    | <b>y<sub>15</sub>-NH<sub>3</sub><sup>+2</sup></b> | 1285.6 | <b>TTKTGT TlvA-28</b>               | 1785.9 | <b>TTKTGT TlvATT GNV</b>                |
| 316.2               | <b>TTI</b>                                       | 602.4 | <b>b<sub>6</sub></b>                | 908.4                  | <b>TlvATT-H<sub>2</sub>O</b>                      | 1295.6 | <b>KTGTTI vATT-H<sub>2</sub>O</b>   | 1799.9 | <b>b<sub>15</sub></b>                   |
| 329.7 <sup>+2</sup> | <b>a<sub>7</sub>-NH<sub>3</sub><sup>+2</sup></b> | 602.4 | <b>KTGTTI</b>                       | 908.4                  | <b>TTivAT-H<sub>2</sub>O</b>                      | 1295.6 | <b>TKTGTT IvAT-</b>                 | 1813.9 | <b>y<sub>15</sub>-H<sub>2</sub>O</b>    |

|                     |                                                   |                     |                                                    |                     |                                                       |        |                                                         |        |                                      |
|---------------------|---------------------------------------------------|---------------------|----------------------------------------------------|---------------------|-------------------------------------------------------|--------|---------------------------------------------------------|--------|--------------------------------------|
|                     |                                                   |                     |                                                    |                     |                                                       |        | H <sub>2</sub> O                                        |        |                                      |
| 331.2               | <b>ATTG</b>                                       | 603.3               | <b>y<sub>6</sub>-NH<sub>3</sub></b>                | 909.5 <sup>+2</sup> | <b>b<sub>15</sub>+H<sub>2</sub>O</b><br><sub>+2</sub> | 1295.6 | <b>TKKTGT</b><br><b>TivA-</b><br><b>H<sub>2</sub>O</b>  | 1814.8 | <b>y<sub>15</sub>-NH<sub>3</sub></b> |
| 331.2               | <b>TKT</b>                                        | 611.2               | <b>vAT</b>                                         | 912.4               | <b>TGTTiv</b>                                         | 1296.6 | <b>KTGTTI</b><br><b>vATT-</b><br><b>NH<sub>3</sub></b>  | 1817.9 | <b>b<sub>15</sub>+H<sub>2</sub>O</b> |
| 331.2               | <b>TTK</b>                                        | 620.3               | <b>y<sub>6</sub></b>                               | 916.4 <sup>+2</sup> | <b>y<sub>15</sub></b> <sup>+2</sup>                   | 1296.6 | <b>TKTGTT</b><br><b>IvAT-</b><br><b>NH<sub>3</sub></b>  | 1831.9 | <b>y<sub>15</sub></b>                |
| 333.2               | <b>TGTT-28</b>                                    | 623.3               | <b>IvA</b>                                         | 917.5               | <b>b<sub>9</sub></b>                                  | 1296.6 | <b>TKKTGT</b><br><b>TivA-</b><br><b>NH<sub>3</sub></b>  | 1853.9 | <b>a<sub>16</sub>-NH<sub>3</sub></b> |
| 338.2 <sup>+2</sup> | <b>a<sub>7</sub></b> <sup>+2</sup>                | 625.3               | <b>Tiv-28</b>                                      | 926.4               | <b>TivATT</b>                                         | 1297.6 | <b>TTivAT</b><br><b>TGNV</b>                            | 1870.9 | <b>a<sub>16</sub></b>                |
| 343.2               | <b>TGTT-H<sub>2</sub>O</b>                        | 635.3               | <b>Tiv-H<sub>2</sub>O</b>                          | 926.4               | <b>TTivAT</b>                                         | 1310.7 | <b>a<sub>10</sub>-NH<sub>3</sub></b>                    | 1880.9 | <b>b<sub>16</sub>-H<sub>2</sub>O</b> |
| 343.2               | <b>y<sub>3</sub>-H<sub>2</sub>O</b>               | 653.3               | <b>Tiv</b>                                         | 927.5 <sup>+2</sup> | <b>a<sub>16</sub>-NH<sub>3</sub></b> <sup>+2</sup>    | 1313.6 | <b>KTGTTI</b><br><b>vATT</b>                            | 1881.9 | <b>b<sub>16</sub>-NH<sub>3</sub></b> |
| 343.2 <sup>+2</sup> | <b>b<sub>7</sub>-H<sub>2</sub>O</b> <sup>+2</sup> | 655.8 <sup>+2</sup> | <b>a<sub>10</sub>-NH<sub>3</sub></b> <sup>+2</sup> | 936.0 <sup>+2</sup> | <b>a<sub>16</sub></b> <sup>+2</sup>                   | 1313.6 | <b>TKTGTT</b><br><b>IvAT</b>                            | 1898.9 | <b>b<sub>16</sub></b>                |
| 343.7 <sup>+2</sup> | <b>b<sub>7</sub>-NH<sub>3</sub></b> <sup>+2</sup> | 658.4               | <b>a<sub>7</sub>-NH<sub>3</sub></b>                | 941.0 <sup>+2</sup> | <b>b<sub>16</sub>-H<sub>2</sub>O</b> <sup>+2</sup>    | 1313.6 | <b>TKKTGT</b><br><b>TivA</b>                            | 1914.9 | <b>y<sub>16</sub>-H<sub>2</sub>O</b> |
| 344.1               | <b>y<sub>3</sub>-NH<sub>3</sub></b>               | 663.4               | <b>TKKTGT</b><br><b>T-28</b>                       | 941.5 <sup>+2</sup> | <b>b<sub>16</sub>-NH<sub>3</sub></b> <sup>+2</sup>    | 1325.6 | <b>y<sub>10</sub>-H<sub>2</sub>O</b>                    | 1915.9 | <b>y<sub>16</sub>-NH<sub>3</sub></b> |
| 344.2               | <b>TGNV-28</b>                                    | 664.4 <sup>+2</sup> | <b>a<sub>10</sub></b> <sup>+2</sup>                | 950.0 <sup>+2</sup> | <b>b<sub>16</sub></b> <sup>+2</sup>                   | 1326.6 | <b>y<sub>10</sub>-NH<sub>3</sub></b>                    | 1917.0 | <b>b<sub>16</sub>+H<sub>2</sub>O</b> |
| 345.2               | <b>GTTI-28</b>                                    | 669.3 <sup>+2</sup> | <b>b<sub>10</sub>-H<sub>2</sub>O</b> <sup>+2</sup> | 954.4               | <b>vATTG</b><br><b>NV-28</b>                          | 1326.6 | <b>GTTivA</b><br><b>TTGNV-28</b>                        | 1932.9 | <b>y<sub>16</sub></b>                |
| 346.2               | <b>TTGN-28</b>                                    | 669.8 <sup>+2</sup> | <b>b<sub>10</sub>-NH<sub>3</sub></b> <sup>+2</sup> | 955.4               | <b>TivATT</b><br><b>G-28</b>                          | 1327.7 | <b>a<sub>10</sub></b>                                   | 2028.0 | <b>MH-H<sub>2</sub>O</b>             |
| 352.2 <sup>+2</sup> | <b>b<sub>7</sub></b> <sup>+2</sup>                | 673.3               | <b>y<sub>7</sub>-H<sub>2</sub>O</b>                | 955.4               | <b>TGTTiv</b><br><b>A-28</b>                          | 1328.6 | <b>TGTTiv</b><br><b>ATTGN-28</b>                        | 2029.0 | <b>MH-NH<sub>3</sub></b>             |
| 354.2               | <b>TGNV-H<sub>2</sub>O</b>                        | 673.4               | <b>TKKTGT</b><br><b>T-H<sub>2</sub>O</b>           | 955.4               | <b>GTTivA</b><br><b>T-28</b>                          | 1336.6 | <b>GTTivA</b><br><b>TTGNV-</b><br><b>H<sub>2</sub>O</b> | 2046.0 | <b>MH</b>                            |
| 355.2               | <b>TGNV-NH<sub>3</sub></b>                        | 674.3               | <b>y<sub>7</sub>-NH<sub>3</sub></b>                | 958.0 <sup>+2</sup> | <b>y<sub>16</sub>-H<sub>2</sub>O</b> <sup>+2</sup>    | 1337.6 | <b>GTTivATTGNV-NH<sub>3</sub></b>                       |        |                                      |

# AANVTLNTTGTLTTVK

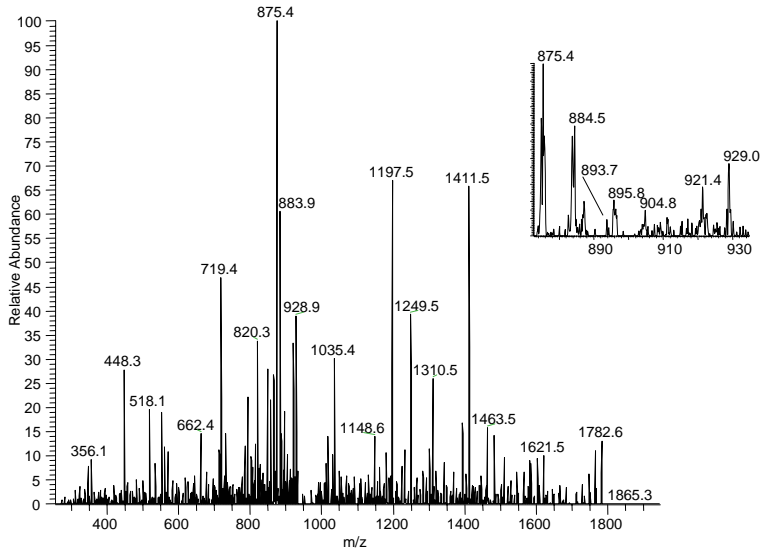

|                     |                                                  |                     |                                                  |                     |                                                               |                     |                                                               |        |                                                  |
|---------------------|--------------------------------------------------|---------------------|--------------------------------------------------|---------------------|---------------------------------------------------------------|---------------------|---------------------------------------------------------------|--------|--------------------------------------------------|
| 65.6 <sup>+2</sup>  | <b>y<sub>1</sub>-NH<sub>3</sub><sup>+2</sup></b> | 350.2               | <b>uT-28</b>                                     | 574.3               | <b>LuTT-H<sub>2</sub>O</b>                                    | 849.4               | <b>VTLuTTG</b>                                                | 1197.6 | <b>y<sub>10</sub></b>                            |
| 72.1                | <b>V</b>                                         | 351.2 <sup>+2</sup> | <b>y<sub>7</sub>-H<sub>2</sub>O<sup>+2</sup></b> | 574.3               | <b>TLuT-H<sub>2</sub>O</b>                                    | 851.4               | <b>uTTGTLT</b>                                                | 1198.6 | <b>uVTLuTTGT-28</b>                              |
| 74.1                | <b>T</b>                                         | 351.7 <sup>+2</sup> | <b>y<sub>7</sub>-NH<sub>3</sub><sup>+2</sup></b> | 575.3               | <b>TGTLTT</b>                                                 | 851.4               | <b>TLuTTGT</b>                                                | 1208.6 | <b>uVTLuTTGT-H<sub>2</sub>O</b>                  |
| 74.1 <sup>+2</sup>  | <b>y<sub>1</sub><sup>+2</sup></b>                | 355.2               | <b>GTLT-H<sub>2</sub>O</b>                       | 575.3               | <b>TTGTLT</b>                                                 | 863.4               | <b>LuTTGTL</b>                                                | 1210.6 | <b>b<sub>9</sub></b>                             |
| 84.1                | <b>K</b>                                         | 355.2               | <b>TGTL-H<sub>2</sub>O</b>                       | 590.3               | <b>uVTL</b>                                                   | 866.4               | <b>uVTLu</b>                                                  | 1226.6 | <b>uVTLuTTGT</b>                                 |
| 86.1                | <b>L</b>                                         | 360.1               | <b>uT-H<sub>2</sub>O</b>                         | 590.3               | <b>VTLu</b>                                                   | 885.0 <sup>+2</sup> | <b>y<sub>14</sub><sup>-</sup>-H<sub>2</sub>O<sup>+2</sup></b> | 1237.7 | <b>VTLuTTGTLTT-28</b>                            |
| 101.1               | <b>K</b>                                         | 360.2 <sup>+2</sup> | <b>y<sub>7</sub><sup>+2</sup></b>                | 590.3 <sup>+2</sup> | <b>y<sub>10</sub><sup>-</sup>-H<sub>2</sub>O<sup>+2</sup></b> | 885.5 <sup>+2</sup> | <b>y<sub>14</sub><sup>-</sup>-NH<sub>3</sub><sup>+2</sup></b> | 1237.7 | <b>TLuTTGTLTTV-28</b>                            |
| 115.1 <sup>+2</sup> | <b>y<sub>2</sub>-NH<sub>3</sub><sup>+2</sup></b> | 361.2               | <b>TTGT</b>                                      | 590.8 <sup>+2</sup> | <b>y<sub>10</sub><sup>-</sup>-NH<sub>3</sub><sup>+2</sup></b> | 894.0 <sup>+2</sup> | <b>y<sub>14</sub><sup>+2</sup></b>                            | 1239.6 | <b>a<sub>10</sub></b>                            |
| 115.1               | <b>a<sub>2</sub></b>                             | 362.2               | <b>Lu-28</b>                                     | 591.3               | <b>a<sub>5</sub></b>                                          | 903.5               | <b>y<sub>9</sub>-H<sub>2</sub>O</b>                           | 1247.6 | <b>TLuTTGTLTTV-H<sub>2</sub>O</b>                |
| 123.6 <sup>+2</sup> | <b>y<sub>2</sub><sup>+2</sup></b>                | 373.2               | <b>TGTL</b>                                      | 592.3               | <b>LuTT</b>                                                   | 904.5               | <b>y<sub>9</sub>-NH<sub>3</sub></b>                           | 1247.6 | <b>VTLuTTGTLTT-H<sub>2</sub>O</b>                |
| 126.1               | <b>K</b>                                         | 373.2               | <b>GTLT</b>                                      | 592.3               | <b>TLuT</b>                                                   | 909.4               | <b>AuVTLu-28</b>                                              | 1249.6 | <b>b<sub>10</sub><sup>-</sup>-H<sub>2</sub>O</b> |
| 129.1               | <b>K</b>                                         | 376.2               | <b>uV</b>                                        | 599.3 <sup>+2</sup> | <b>y<sub>10</sub><sup>+2</sup></b>                            | 919.4               | <b>AuVTLu-H<sub>2</sub>O</b>                                  | 1265.6 | <b>TLuTTGTLTTV</b>                               |
| 130.1               | <b>y<sub>1</sub>-NH<sub>3</sub></b>              | 378.2               | <b>uT</b>                                        | 601.3               | <b>b<sub>5</sub>-H<sub>2</sub>O</b>                           | 920.5 <sup>+2</sup> | <b>y<sub>15</sub><sup>-</sup>-H<sub>2</sub>O<sup>+2</sup></b> | 1265.6 | <b>VTLuTTGTLTT</b>                               |
| 131.1               | <b>TG-28</b>                                     | 387.3               | <b>LTTV-28</b>                                   | 609.3               | <b>uTTGT-28</b>                                               | 921.0 <sup>+2</sup> | <b>y<sub>15</sub><sup>-</sup>-NH<sub>3</sub><sup>+2</sup></b> | 1267.6 | <b>b<sub>10</sub></b>                            |

|                     |                                                  |                     |                                                  |                     |                                                   |                     |                                       |        |                                      |
|---------------------|--------------------------------------------------|---------------------|--------------------------------------------------|---------------------|---------------------------------------------------|---------------------|---------------------------------------|--------|--------------------------------------|
| 131.1               | <b>GT-28</b>                                     | 389.2               | <b>TLTT-28</b>                                   | 619.3               | <b>uTTGT-H<sub>2</sub>O</b>                       | 921.5               | <b>y<sub>9</sub></b>                  | 1269.6 | <b>AuVTLu TTGT-28</b>                |
| 141.1               | <b>GT-H<sub>2</sub>O</b>                         | 390.2               | <b>Lu</b>                                        | 619.3               | <b>b<sub>5</sub></b>                              | 922.5               | <b>VTLuTT GT-28</b>                   | 1279.6 | <b>AuVTLu TTGT-H<sub>2</sub>O</b>    |
| 141.1               | <b>TG-H<sub>2</sub>O</b>                         | 391.2               | <b>a<sub>3</sub></b>                             | 621.3               | <b>LuTTG-28</b>                                   | 924.5               | <b>uTTGTL TT-28</b>                   | 1292.7 | <b>y<sub>11</sub>-H<sub>2</sub>O</b> |
| 143.1               | <b>b<sub>2</sub></b>                             | 397.2               | <b>LTTV-H<sub>2</sub>O</b>                       | 631.3               | <b>LuTTG-H<sub>2</sub>O</b>                       | 929.5 <sup>+2</sup> | <b>y<sub>15</sub><sup>+2</sup></b>    | 1293.7 | <b>y<sub>11</sub>-NH<sub>3</sub></b> |
| 147.1               | <b>y<sub>1</sub></b>                             | 399.2               | <b>TLTT-H<sub>2</sub>O</b>                       | 633.3               | <b>AuVTL-28</b>                                   | 932.5               | <b>VTLuTT GT-H<sub>2</sub>O</b>       | 1297.6 | <b>AuVTLu TTGT</b>                   |
| 159.1               | <b>TG</b>                                        | 401.7 <sup>+2</sup> | <b>y<sub>8</sub>-H<sub>2</sub>O<sup>+2</sup></b> | 637.3               | <b>uTTGT</b>                                      | 934.4               | <b>uTTGTL TT-H<sub>2</sub>O</b>       | 1310.7 | <b>y<sub>11</sub></b>                |
| 159.1               | <b>GT</b>                                        | 402.2 <sup>+2</sup> | <b>y<sub>8</sub>-NH<sub>3</sub><sup>+2</sup></b> | 643.3               | <b>AuVTL-H<sub>2</sub>O</b>                       | 936.5               | <b>LuTTGT LT-28</b>                   | 1311.7 | <b>uVTLuT TGTL-28</b>                |
| 165.1 <sup>+2</sup> | <b>y<sub>3</sub>-H<sub>2</sub>O<sup>+2</sup></b> | 410.7 <sup>+2</sup> | <b>y<sub>8</sub><sup>+2</sup></b>                | 644.4               | <b>y<sub>6</sub>-H<sub>2</sub>O</b>               | 936.5               | <b>TLuTTG TL-28</b>                   | 1321.6 | <b>uVTLuT TGTL-H<sub>2</sub>O</b>    |
| 165.6 <sup>+2</sup> | <b>y<sub>3</sub>-NH<sub>3</sub><sup>+2</sup></b> | 415.3               | <b>LTTV</b>                                      | 645.4               | <b>y<sub>6</sub>-NH<sub>3</sub></b>               | 937.4               | <b>AuVTLu</b>                         | 1336.7 | <b>VTLuTT GTLTTV-28</b>              |
| 173.1               | <b>TV-28</b>                                     | 417.2               | <b>TLTT</b>                                      | 646.4               | <b>TGTLTT V-28</b>                                | 939.5               | <b>uVTLuT -28</b>                     | 1339.6 | <b>uVTLuT TGTL</b>                   |
| 173.1               | <b>VT-28</b>                                     | 419.2               | <b>b<sub>3</sub></b>                             | 646.9 <sup>+2</sup> | <b>y<sub>11</sub>-H<sub>2</sub>O<sup>+2</sup></b> | 946.5               | <b>LuTTGT LT-H<sub>2</sub>O</b>       | 1340.6 | <b>a<sub>11</sub></b>                |
| 174.1 <sup>+2</sup> | <b>y<sub>3</sub><sup>+2</sup></b>                | 419.2               | <b>AuV-28</b>                                    | 647.3 <sup>+2</sup> | <b>y<sub>11</sub>-NH<sub>3</sub><sup>+2</sup></b> | 946.5               | <b>TLuTTG TL-H<sub>2</sub>O</b>       | 1346.7 | <b>VTLuTT GTLTTV-H<sub>2</sub>O</b>  |
| 175.1               | <b>TT-28</b>                                     | 430.3               | <b>y<sub>4</sub>-H<sub>2</sub>O</b>              | 648.4               | <b>TTGTLT T-28</b>                                | 949.4               | <b>uVTLuT -H<sub>2</sub>O</b>         | 1350.6 | <b>b<sub>11</sub>-H<sub>2</sub>O</b> |
| 183.1               | <b>TV-H<sub>2</sub>O</b>                         | 431.3               | <b>y<sub>4</sub>-NH<sub>3</sub></b>              | 649.3               | <b>LuTTG</b>                                      | 950.5               | <b>VTLuTT GT</b>                      | 1364.7 | <b>VTLuTT GTLTTV</b>                 |
| 183.1               | <b>VT-H<sub>2</sub>O</b>                         | 446.3               | <b>GTLTT-28</b>                                  | 655.9 <sup>+2</sup> | <b>y<sub>11</sub><sup>+2</sup></b>                | 952.4               | <b>uTTGTL TT</b>                      | 1368.6 | <b>b<sub>11</sub></b>                |
| 185.1               | <b>TT-H<sub>2</sub>O</b>                         | 446.3               | <b>TGTLT-28</b>                                  | 656.4               | <b>TGTLTT V-H<sub>2</sub>O</b>                    | 956.0 <sup>+2</sup> | <b>MH-H<sub>2</sub>O<sup>+2</sup></b> | 1382.7 | <b>AuVTLu TTGTL-28</b>               |
| 187.1               | <b>LT-28</b>                                     | 446.3               | <b>TTGTL-28</b>                                  | 658.3               | <b>TTGTLT T-H<sub>2</sub>O</b>                    | 956.5 <sup>+2</sup> | <b>MH-NH<sub>3</sub><sup>+2</sup></b> | 1392.7 | <b>AuVTLu TTGTL-H<sub>2</sub>O</b>   |
| 187.1               | <b>TL-28</b>                                     | 447.2               | <b>AuV</b>                                       | 661.3               | <b>AuVTL</b>                                      | 964.5               | <b>LuTTGT LT</b>                      | 1393.7 | <b>y<sub>12</sub>-H<sub>2</sub>O</b> |
| 197.1               | <b>LT-H<sub>2</sub>O</b>                         | 448.3               | <b>y<sub>4</sub></b>                             | 662.4               | <b>y<sub>6</sub></b>                              | 964.5               | <b>TLuTTG TL</b>                      | 1394.7 | <b>y<sub>12</sub>-NH<sub>3</sub></b> |
| 197.1               | <b>TL-H<sub>2</sub>O</b>                         | 449.2               | <b>uVT-28</b>                                    | 663.4               | <b>VTLuT-28</b>                                   | 965.0 <sup>+2</sup> | <b>MH<sup>+2</sup></b>                | 1410.7 | <b>AuVTLu TTGTL</b>                  |
| 201.1               | <b>TV</b>                                        | 451.2               | <b>uTT-28</b>                                    | 665.3               | <b>TLuTT-28</b>                                   | 967.4               | <b>uVTLuT</b>                         | 1411.8 | <b>y<sub>12</sub></b>                |
| 201.1               | <b>VT</b>                                        | 452.3 <sup>+2</sup> | <b>y<sub>9</sub>-H<sub>2</sub>O<sup>+2</sup></b> | 673.3               | <b>VTLuT-H<sub>2</sub>O</b>                       | 980.5               | <b>a<sub>7</sub></b>                  | 1412.7 | <b>uVTLuT TGTLT-28</b>               |
| 203.1               | <b>TT</b>                                        | 452.8 <sup>+2</sup> | <b>y<sub>9</sub>-NH<sub>3</sub><sup>+2</sup></b> | 674.4               | <b>TGTLTT V</b>                                   | 990.5               | <b>b<sub>7</sub>-H<sub>2</sub>O</b>   | 1422.7 | <b>uVTLuT TGTLT-H<sub>2</sub>O</b>   |

|                     |                                                |                     |                              |                     |                                                     |        |                                    |        |                                        |
|---------------------|------------------------------------------------|---------------------|------------------------------|---------------------|-----------------------------------------------------|--------|------------------------------------|--------|----------------------------------------|
| 215.1               | LT                                             | 456.2               | GTLTT-H <sub>2</sub> O       | 675.3               | TLuTT-H <sub>2</sub> O                              | 1008.5 | b <sub>7</sub>                     | 1440.7 | uVTLuT<br>TGTLT                        |
| 215.1               | TL                                             | 456.2               | TGTLT-H <sub>2</sub> O       | 676.4               | TTGTLT<br>T                                         | 1010.5 | AuVTLu<br>T-28                     | 1453.7 | a <sub>12</sub>                        |
| 215.6 <sup>+2</sup> | y <sub>4</sub> -H <sub>2</sub> O <sup>+2</sup> | 456.2               | TTGTL-H <sub>2</sub> O       | 691.4               | VTLuT                                               | 1020.5 | AuVTLu<br>T-H <sub>2</sub> O       | 1463.7 | b <sub>12</sub> -H <sub>2</sub> O      |
| 216.1 <sup>+2</sup> | y <sub>4</sub> -NH <sub>3</sub> <sup>+2</sup>  | 459.2               | uVT-H <sub>2</sub> O         | 693.3               | TLuTT                                               | 1023.5 | uTTGTL<br>TTV-28                   | 1481.7 | b <sub>12</sub>                        |
| 224.6 <sup>+2</sup> | y <sub>4</sub> <sup>+2</sup>                   | 461.2               | uTT-H <sub>2</sub> O         | 697.4 <sup>+2</sup> | y <sub>12</sub> -<br>H <sub>2</sub> O <sup>+2</sup> | 1033.5 | uTTGTL<br>TTV-<br>H <sub>2</sub> O | 1483.7 | AuVTLu<br>TTGTLT<br>-28                |
| 229.2               | y <sub>2</sub> -NH <sub>3</sub>                | 461.3 <sup>+2</sup> | y <sub>9</sub> <sup>+2</sup> | 697.9 <sup>+2</sup> | y <sub>12</sub> -<br>NH <sub>3</sub> <sup>+2</sup>  | 1035.6 | VTLuTT<br>GTL-28                   | 1492.8 | y <sub>13</sub> -H <sub>2</sub> O      |
| 232.1               | TTG-28                                         | 463.2               | LuT-28                       | 701.4               | y <sub>7</sub> -H <sub>2</sub> O                    | 1037.5 | LuTTGT<br>LTT-28                   | 1493.7 | AuVTLu<br>TTGTLT<br>-H <sub>2</sub> O  |
| 232.1               | TGT-28                                         | 463.2               | TLu-28                       | 702.4               | y <sub>7</sub> -NH <sub>3</sub>                     | 1037.5 | TLuTTG<br>TLT-28                   | 1493.8 | y <sub>13</sub> -NH <sub>3</sub>       |
| 242.1               | TGT-H <sub>2</sub> O                           | 473.2               | LuT-H <sub>2</sub> O         | 704.4               | a <sub>6</sub>                                      | 1038.5 | AuVTLu<br>T                        | 1510.8 | y <sub>13</sub>                        |
| 242.1               | TTG-H <sub>2</sub> O                           | 473.2               | TLu-H <sub>2</sub> O         | 706.4 <sup>+2</sup> | y <sub>12</sub> <sup>+2</sup>                       | 1040.5 | uVTLuT<br>T-28                     | 1511.7 | AuVTLu<br>TTGTLT                       |
| 244.2               | GTL-28                                         | 474.3               | TGTLT                        | 714.4               | b <sub>6</sub> -H <sub>2</sub> O                    | 1045.5 | VTLuTT<br>GTL-<br>H <sub>2</sub> O | 1513.7 | uVTLuT<br>TGTLTT<br>-28                |
| 246.2               | y <sub>2</sub>                                 | 474.3               | GTLTT                        | 719.4               | y <sub>7</sub>                                      | 1047.5 | LuTTGT<br>LTT-<br>H <sub>2</sub> O | 1523.7 | uVTLuT<br>TGTLTT<br>-H <sub>2</sub> O  |
| 254.1               | GTL-H <sub>2</sub> O                           | 474.3               | TTGTL                        | 722.4               | uTTGTL<br>-28                                       | 1047.5 | TLuTTG<br>TLT-<br>H <sub>2</sub> O | 1541.7 | uVTLuT<br>TGTLTT                       |
| 260.1               | TTG                                            | 477.2               | uVT                          | 722.4               | LuTTGT<br>-28                                       | 1050.5 | uVTLuT<br>T-H <sub>2</sub> O       | 1554.8 | a <sub>13</sub>                        |
| 260.1               | TGT                                            | 479.2               | uTT                          | 722.4               | TLuTTG<br>-28                                       | 1051.5 | uTTGTL<br>TTV                      | 1564.8 | b <sub>13</sub> -H <sub>2</sub> O      |
| 272.2               | GTL                                            | 488.3               | TLTTV-<br>28                 | 732.3               | uTTGTL<br>-H <sub>2</sub> O                         | 1063.6 | VTLuTT<br>GTL                      | 1582.8 | b <sub>13</sub>                        |
| 272.2 <sup>+2</sup> | y <sub>5</sub> -H <sub>2</sub> O <sup>+2</sup> | 490.3               | a <sub>4</sub>               | 732.3               | LuTTGT<br>-H <sub>2</sub> O                         | 1065.5 | TLuTTG<br>TLT                      | 1584.8 | AuVTLu<br>TTGTLT<br>T-28               |
| 272.7 <sup>+2</sup> | y <sub>5</sub> -NH <sub>3</sub> <sup>+2</sup>  | 491.2               | LuT                          | 732.3               | TLuTTG<br>-H <sub>2</sub> O                         | 1065.5 | LuTTGT<br>LTT                      | 1594.8 | AuVTLu<br>TTGTLT<br>T-H <sub>2</sub> O |
| 274.2               | TTV-28                                         | 491.2               | TLu                          | 732.4               | b <sub>6</sub>                                      | 1068.5 | uVTLuT<br>T                        | 1612.8 | AuVTLu<br>TTGTLT<br>T                  |
| 281.2 <sup>+2</sup> | y <sub>5</sub> <sup>+2</sup>                   | 498.3               | TLTTV-<br>H <sub>2</sub> O   | 746.9 <sup>+2</sup> | y <sub>13</sub> -<br>H <sub>2</sub> O <sup>+2</sup> | 1081.5 | a <sub>8</sub>                     | 1612.8 | uVTLuT<br>TGTLTT<br>V-28               |
| 284.2               | TTV-<br>H <sub>2</sub> O                       | 508.2               | uTTG-<br>28                  | 747.4 <sup>+2</sup> | y <sub>13</sub> -<br>NH <sub>3</sub> <sup>+2</sup>  | 1091.5 | b <sub>8</sub> -H <sub>2</sub> O   | 1622.8 | uVTLuT<br>TGTLTT<br>V-H <sub>2</sub> O |
| 286.2               | VTL-28                                         | 516.3               | TLTTV                        | 747.4               | TTGTLT<br>TV-28                                     | 1097.5 | uVTLuT<br>TG-28                    | 1640.8 | uVTLuT<br>TGTLTT<br>V                  |

|                     |                                                  |       |                                     |                     |                                     |        |                                            |        |                                                |
|---------------------|--------------------------------------------------|-------|-------------------------------------|---------------------|-------------------------------------|--------|--------------------------------------------|--------|------------------------------------------------|
| 288.2               | <b>LTT-28</b>                                    | 518.2 | <b>uTTG-H<sub>2</sub>O</b>          | 750.4               | <b>uTTGT</b>                        | 1107.5 | <b>uVTLuT<br/>TG-H<sub>2</sub>O</b>        | 1655.8 | <b>a<sub>14</sub></b>                          |
| 288.2               | <b>TLT-28</b>                                    | 518.2 | <b>b<sub>4</sub></b>                | 750.4               | <b>LuTTGT</b>                       | 1109.5 | <b>b<sub>8</sub></b>                       | 1665.8 | <b>b<sub>14</sub>-H<sub>2</sub>O</b>           |
| 296.2               | <b>VTL-H<sub>2</sub>O</b>                        | 520.3 | <b>AuVT-28</b>                      | 750.4               | <b>TLuTTG</b>                       | 1111.5 | <b>AuVTLu<br/>TT-28</b>                    | 1683.8 | <b>b<sub>14</sub></b>                          |
| 298.2               | <b>TLT-H<sub>2</sub>O</b>                        | 530.2 | <b>AuVT-H<sub>2</sub>O</b>          | 755.9 <sup>+2</sup> | <b>y<sub>13</sub><sup>+2</sup></b>  | 1121.5 | <b>AuVTLu<br/>TT-H<sub>2</sub>O</b>        | 1683.9 | <b>AuVTLu<br/>TTGTLT<br/>TV-28</b>             |
| 298.2               | <b>LTT-H<sub>2</sub>O</b>                        | 536.2 | <b>uTTG</b>                         | 757.4               | <b>TTGTLT<br/>TV-H<sub>2</sub>O</b> | 1125.5 | <b>uVTLuT<br/>TG</b>                       | 1693.8 | <b>AuVTLu<br/>TTGTLT<br/>TV-H<sub>2</sub>O</b> |
| 302.2               | <b>TTV</b>                                       | 543.4 | <b>y<sub>5</sub>-H<sub>2</sub>O</b> | 764.4               | <b>VTLuTT<br/>-28</b>               | 1136.6 | <b>LuTTGT<br/>LTTV-28</b>                  | 1711.8 | <b>AuVTLu<br/>TTGTLT<br/>TV</b>                |
| 314.2               | <b>VTL</b>                                       | 544.3 | <b>y<sub>5</sub>-NH<sub>3</sub></b> | 774.4               | <b>VTLuTT<br/>-H<sub>2</sub>O</b>   | 1136.6 | <b>VTLuTT<br/>GTLT-<br/>28</b>             | 1754.9 | <b>a<sub>15</sub></b>                          |
| 316.2               | <b>LTT</b>                                       | 545.3 | <b>GTLTTV<br/>-28</b>               | 775.4               | <b>TTGTLT<br/>TV</b>                | 1138.6 | <b>TLuTTG<br/>TLTT-28</b>                  | 1764.9 | <b>b<sub>15</sub>-H<sub>2</sub>O</b>           |
| 316.2               | <b>TLT</b>                                       | 547.3 | <b>TGTLTT<br/>-28</b>               | 792.4               | <b>VTLuTT</b>                       | 1139.5 | <b>AuVTLu<br/>TT</b>                       | 1768.9 | <b>y<sub>14</sub>-H<sub>2</sub>O</b>           |
| 320.1               | <b>Au-28</b>                                     | 547.3 | <b>TTGTLT<br/>-28</b>               | 802.5               | <b>y<sub>8</sub>-H<sub>2</sub>O</b> | 1146.6 | <b>LuTTGT<br/>LTTV-<br/>H<sub>2</sub>O</b> | 1769.9 | <b>y<sub>14</sub>-NH<sub>3</sub></b>           |
| 322.7 <sup>+2</sup> | <b>y<sub>6</sub>-H<sub>2</sub>O<sup>+2</sup></b> | 548.3 | <b>AuVT</b>                         | 803.5               | <b>y<sub>8</sub>-NH<sub>3</sub></b> | 1146.6 | <b>VTLuTT<br/>GTLT-<br/>H<sub>2</sub>O</b> | 1782.9 | <b>b<sub>15</sub></b>                          |
| 323.2 <sup>+2</sup> | <b>y<sub>6</sub>-NH<sub>3</sub><sup>+2</sup></b> | 555.3 | <b>GTLTTV<br/>-H<sub>2</sub>O</b>   | 820.5               | <b>y<sub>8</sub></b>                | 1148.6 | <b>TLuTTG<br/>TLTT-<br/>H<sub>2</sub>O</b> | 1786.9 | <b>y<sub>14</sub></b>                          |
| 329.2               | <b>y<sub>3</sub>-H<sub>2</sub>O</b>              | 557.3 | <b>TTGTLT<br/>-H<sub>2</sub>O</b>   | 821.4               | <b>VTLuTT<br/>G-28</b>              | 1164.6 | <b>LuTTGT<br/>LTTV</b>                     | 1839.9 | <b>y<sub>15</sub>-H<sub>2</sub>O</b>           |
| 330.2               | <b>y<sub>3</sub>-NH<sub>3</sub></b>              | 557.3 | <b>TGTLTT<br/>-H<sub>2</sub>O</b>   | 823.4               | <b>uTTGT<br/>T-28</b>               | 1164.6 | <b>VTLuTT<br/>GTLT</b>                     | 1840.9 | <b>y<sub>15</sub>-NH<sub>3</sub></b>           |
| 331.7 <sup>+2</sup> | <b>y<sub>6</sub><sup>+2</sup></b>                | 561.4 | <b>y<sub>5</sub></b>                | 823.4               | <b>TLuTTG<br/>T-28</b>              | 1166.6 | <b>TLuTTG<br/>TLTT</b>                     | 1858.0 | <b>y<sub>15</sub></b>                          |
| 333.2               | <b>TTGT-<br/>28</b>                              | 562.3 | <b>uVTL-28</b>                      | 831.4               | <b>VTLuTT<br/>G-H<sub>2</sub>O</b>  | 1168.6 | <b>AuVTLu<br/>TTG-28</b>                   | 1911.0 | <b>MH-H<sub>2</sub>O</b>                       |
| 343.2               | <b>TTGT-<br/>H<sub>2</sub>O</b>                  | 562.3 | <b>VTLu-28</b>                      | 833.4               | <b>uTTGT<br/>T-H<sub>2</sub>O</b>   | 1178.5 | <b>AuVTLu<br/>TTG-<br/>H<sub>2</sub>O</b>  | 1912.0 | <b>MH-NH<sub>3</sub></b>                       |
| 345.2               | <b>GTLT-<br/>28</b>                              | 564.3 | <b>LuTT-28</b>                      | 833.4               | <b>TLuTTG<br/>T-H<sub>2</sub>O</b>  | 1179.6 | <b>y<sub>10</sub>-H<sub>2</sub>O</b>       | 1929.0 | <b>MH</b>                                      |
| 345.2               | <b>TGTL-<br/>28</b>                              | 564.3 | <b>TLuT-28</b>                      | 835.4               | <b>LuTTGT<br/>L-28</b>              | 1180.6 | <b>y<sub>10</sub>-NH<sub>3</sub></b>       |        |                                                |
| 347.2               | <b>y<sub>3</sub></b>                             | 572.3 | <b>uVTL-<br/>H<sub>2</sub>O</b>     | 838.4               | <b>uVTLu-<br/>28</b>                | 1182.6 | <b>a<sub>9</sub></b>                       |        |                                                |
| 348.1               | <b>Au</b>                                        | 572.3 | <b>VTLu-<br/>H<sub>2</sub>O</b>     | 845.4               | <b>LuTTGT<br/>L-H<sub>2</sub>O</b>  | 1192.6 | <b>b<sub>9</sub>-H<sub>2</sub>O</b>        |        |                                                |
| 348.2               | <b>uV-28</b>                                     | 573.3 | <b>GTLTTV</b>                       | 848.4               | <b>uVTLu-<br/>H<sub>2</sub>O</b>    | 1196.6 | <b>AuVTLuTTG</b>                           |        |                                                |

# GSNINATSGTLVINAK

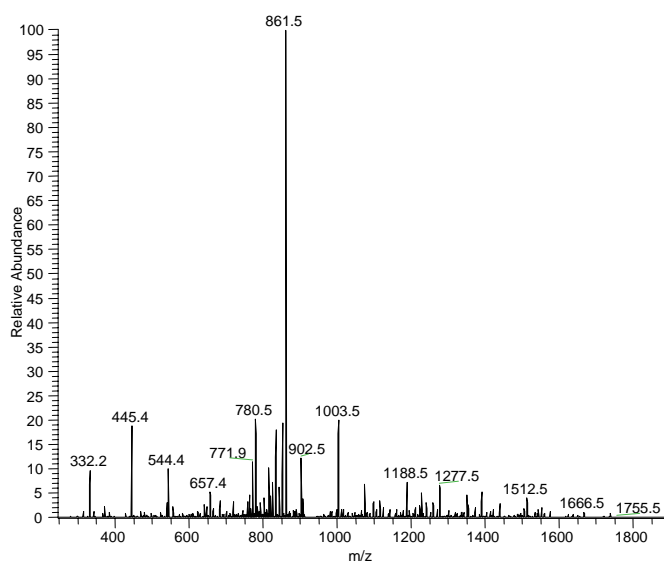

|                     |                                                  |                     |                                                  |       |                                     |                     |                                                               |        |                                      |
|---------------------|--------------------------------------------------|---------------------|--------------------------------------------------|-------|-------------------------------------|---------------------|---------------------------------------------------------------|--------|--------------------------------------|
| 60.0                | <b>S</b>                                         | 319.2               | <b>TSGT-28</b>                                   | 623.3 | <b>IvA</b>                          | 870.5 <sup>+2</sup> | <b>y<sub>14</sub><sup>+2</sup></b>                            | 1266.6 | <b>SNivAT SGTL-NH<sub>3</sub></b>    |
| 65.6 <sup>+2</sup>  | <b>y<sub>1</sub>-NH<sub>3</sub><sup>+2</sup></b> | 320.7 <sup>+2</sup> | <b>y<sub>6</sub>-NH<sub>3</sub><sup>+2</sup></b> | 630.3 | <b>ATSGT LV</b>                     | 881.4               | <b>b<sub>6</sub></b>                                          | 1266.7 | <b>IvATSG TLVI-28</b>                |
| 72.1                | <b>V</b>                                         | 326.2               | <b>LVI</b>                                       | 638.3 | <b>Niv-28</b>                       | 884.5               | <b>y<sub>9</sub>-H<sub>2</sub>O</b>                           | 1267.6 | <b>vATSGT LVIN-28</b>                |
| 74.1                | <b>T</b>                                         | 327.2               | <b>a<sub>4</sub>-NH<sub>3</sub></b>              | 640.4 | <b>y<sub>6</sub>-NH<sub>3</sub></b> | 885.5               | <b>y<sub>9</sub>-NH<sub>3</sub></b>                           | 1267.6 | <b>NivATS GTLV-28</b>                |
| 74.1 <sup>+2</sup>  | <b>y<sub>1</sub><sup>+2</sup></b>                | 327.2               | <b>VIN</b>                                       | 641.4 | <b>GTLVIN A-28</b>                  | 897.4               | <b>SNivAT-28</b>                                              | 1276.7 | <b>IvATSG TLVI-H<sub>2</sub>O</b>    |
| 84.1                | <b>K</b>                                         | 329.1               | <b>TSGT-H<sub>2</sub>O</b>                       | 644.4 | <b>TSGTLV I-28</b>                  | 897.4               | <b>NivATS-28</b>                                              | 1277.6 | <b>vATSGT LVIN-H<sub>2</sub>O</b>    |
| 86.1                | <b>I</b>                                         | 329.2 <sup>+2</sup> | <b>y<sub>6</sub><sup>+2</sup></b>                | 649.3 | <b>Niv-NH<sub>3</sub></b>           | 900.5               | <b>ATSGT LVINA-28</b>                                         | 1277.6 | <b>NivATS GTLV-H<sub>2</sub>O</b>    |
| 86.1                | <b>L</b>                                         | 331.2               | <b>SGTL-28</b>                                   | 651.4 | <b>GTLVIN A-H<sub>2</sub>O</b>      | 902.5               | <b>y<sub>9</sub></b>                                          | 1278.6 | <b>NivATS GTLV-NH<sub>3</sub></b>    |
| 87.1                | <b>N</b>                                         | 332.2               | <b>y<sub>3</sub></b>                             | 652.4 | <b>GTLVIN A-NH<sub>3</sub></b>      | 905.0 <sup>+2</sup> | <b>y<sub>15</sub><sup>-</sup>-H<sub>2</sub>O<sup>+2</sup></b> | 1278.6 | <b>vATSGT LVIN-NH<sub>3</sub></b>    |
| 101.1 <sup>+2</sup> | <b>y<sub>2</sub>-NH<sub>3</sub><sup>+2</sup></b> | 341.2               | <b>SGTL-H<sub>2</sub>O</b>                       | 654.4 | <b>TSGTLV I-H<sub>2</sub>O</b>      | 905.5 <sup>+2</sup> | <b>y<sub>15</sub><sup>-</sup>-NH<sub>3</sub><sup>+2</sup></b> | 1283.6 | <b>SNivAT SGTL</b>                   |
| 101.1               | <b>K</b>                                         | 343.2               | <b>GTLV-28</b>                                   | 657.4 | <b>SGTLVI N-28</b>                  | 907.4               | <b>SNivAT-H<sub>2</sub>O</b>                                  | 1294.7 | <b>IvATSG TLVI</b>                   |
| 109.6 <sup>+2</sup> | <b>y<sub>2</sub><sup>+2</sup></b>                | 344.2               | <b>a<sub>4</sub></b>                             | 657.4 | <b>y<sub>6</sub></b>                | 907.4               | <b>NivATS-H<sub>2</sub>O</b>                                  | 1295.6 | <b>a<sub>11</sub>-NH<sub>3</sub></b> |
| 117.1               | <b>SG-28</b>                                     | 347.2               | <b>TSGT</b>                                      | 666.3 | <b>Niv</b>                          | 908.4               | <b>SNivAT-NH<sub>3</sub></b>                                  | 1295.6 | <b>NivATS GTLV</b>                   |



|                     |                                                  |                     |                                                  |       |                                 |                     |                                       |        |                                      |
|---------------------|--------------------------------------------------|---------------------|--------------------------------------------------|-------|---------------------------------|---------------------|---------------------------------------|--------|--------------------------------------|
| 117.1               | <b>a<sub>2</sub></b>                             | 353.2               | <b>GTLV-H<sub>2</sub>O</b>                       | 667.4 | <b>SGTLVI N-H<sub>2</sub>O</b>  | 908.4               | <b>NivATS-NH<sub>3</sub></b>          | 1295.6 | <b>vATSGT LVIN</b>                   |
| 126.1               | <b>K</b>                                         | 354.2               | <b>b<sub>4</sub>-H<sub>2</sub>O</b>              | 668.4 | <b>SGTLVI N-NH<sub>3</sub></b>  | 910.5               | <b>ATSGT LVINA-H<sub>2</sub>O</b>     | 1312.6 | <b>a<sub>11</sub></b>                |
| 127.1               | <b>b<sub>2</sub>-H<sub>2</sub>O</b>              | 355.2               | <b>b<sub>4</sub>-NH<sub>3</sub></b>              | 669.4 | <b>GTLVIN A</b>                 | 911.5               | <b>ATSGT LVINA-NH<sub>3</sub></b>     | 1322.6 | <b>b<sub>11</sub>-H<sub>2</sub>O</b> |
| 127.1               | <b>SG-H<sub>2</sub>O</b>                         | 359.2               | <b>SGTL</b>                                      | 670.3 | <b>vATS-28</b>                  | 914.0 <sup>+2</sup> | <b>y<sub>15</sub><sup>+2</sup></b>    | 1323.6 | <b>b<sub>11</sub>-NH<sub>3</sub></b> |
| 129.1               | <b>K</b>                                         | 370.2               | <b>VINA-28</b>                                   | 672.4 | <b>TSGTLV I</b>                 | 925.4               | <b>SNivAT</b>                         | 1338.7 | <b>vATSGT LVINA-28</b>               |
| 130.1               | <b>y<sub>1</sub>-NH<sub>3</sub></b>              | 370.7 <sup>+2</sup> | <b>y<sub>7</sub>-H<sub>2</sub>O<sup>+2</sup></b> | 680.3 | <b>vATS-H<sub>2</sub>O</b>      | 925.4               | <b>NivATS</b>                         | 1340.6 | <b>b<sub>11</sub></b>                |
| 131.1               | <b>GT-28</b>                                     | 371.2               | <b>GTLV</b>                                      | 685.4 | <b>SGTLVI N</b>                 | 928.5               | <b>ATSGT LVINA</b>                    | 1348.6 | <b>vATSGT LVINA-H<sub>2</sub>O</b>   |
| 141.1               | <b>GT-H<sub>2</sub>O</b>                         | 371.2 <sup>+2</sup> | <b>y<sub>7</sub>-NH<sub>3</sub><sup>+2</sup></b> | 696.3 | <b>IvAT-28</b>                  | 933.5 <sup>+2</sup> | <b>MH-H<sub>2</sub>O<sup>+2</sup></b> | 1349.6 | <b>vATSGT LVINA-NH<sub>3</sub></b>   |
| 145.1               | <b>b<sub>2</sub></b>                             | 372.2               | <b>b<sub>4</sub></b>                             | 698.3 | <b>vATS</b>                     | 934.0 <sup>+2</sup> | <b>MH-NH<sub>3</sub><sup>+2</sup></b> | 1354.7 | <b>SNivAT SGTLV-28</b>               |
| 145.1               | <b>SG</b>                                        | 379.7 <sup>+2</sup> | <b>y<sub>7</sub><sup>+2</sup></b>                | 706.3 | <b>IvAT-H<sub>2</sub>O</b>      | 937.4               | <b>a<sub>7</sub>-NH<sub>3</sub></b>   | 1364.6 | <b>SNivAT SGTLV-H<sub>2</sub>O</b>   |
| 145.1               | <b>AT-28</b>                                     | 381.2               | <b>VINA-NH<sub>3</sub></b>                       | 709.3 | <b>NivA-28</b>                  | 941.4               | <b>vATSGT L-28</b>                    | 1365.6 | <b>SNivAT SGTLV-NH<sub>3</sub></b>   |
| 147.1               | <b>y<sub>1</sub></b>                             | 390.2               | <b>ATSGT-28</b>                                  | 715.4 | <b>ATSGT LVI-28</b>             | 941.4               | <b>IvATSG T-28</b>                    | 1366.7 | <b>vATSGT LVINA</b>                  |
| 155.1               | <b>AT-H<sub>2</sub>O</b>                         | 398.2               | <b>VINA</b>                                      | 720.3 | <b>NivA-NH<sub>3</sub></b>      | 942.5 <sup>+2</sup> | <b>MH<sup>+2</sup></b>                | 1380.7 | <b>IvATSG TLVIN-28</b>               |
| 158.1 <sup>+2</sup> | <b>y<sub>3</sub>-NH<sub>3</sub><sup>+2</sup></b> | 399.3 <sup>+2</sup> | <b>y<sub>8</sub>-H<sub>2</sub>O<sup>+2</sup></b> | 724.3 | <b>IvAT</b>                     | 951.4               | <b>vATSGT L-H<sub>2</sub>O</b>        | 1380.7 | <b>NivATS GTLVI-28</b>               |
| 158.1               | <b>NA-28</b>                                     | 399.3               | <b>TLVI-28</b>                                   | 725.3 | <b>SNiv-28</b>                  | 951.4               | <b>IvATSG T-H<sub>2</sub>O</b>        | 1382.7 | <b>SNivAT SGTLV</b>                  |
| 159.1               | <b>GT</b>                                        | 399.7 <sup>+2</sup> | <b>y<sub>8</sub>-NH<sub>3</sub><sup>+2</sup></b> | 725.4 | <b>ATSGT LVI-H<sub>2</sub>O</b> | 954.4               | <b>a<sub>7</sub></b>                  | 1390.7 | <b>NivATS GTLVI-H<sub>2</sub>O</b>   |
| 161.1               | <b>TS-28</b>                                     | 400.2               | <b>ATSGT-H<sub>2</sub>O</b>                      | 727.3 | <b>vATSG-28</b>                 | 954.4               | <b>NivATS G-28</b>                    | 1390.7 | <b>IvATSG TLVIN-H<sub>2</sub>O</b>   |
| 166.6 <sup>+2</sup> | <b>y<sub>3</sub><sup>+2</sup></b>                | 408.3 <sup>+2</sup> | <b>y<sub>8</sub><sup>+2</sup></b>                | 728.4 | <b>SGTLVI NA-28</b>             | 964.4               | <b>NivATS G-H<sub>2</sub>O</b>        | 1391.7 | <b>IvATSG TLVIN-NH<sub>3</sub></b>   |
| 169.1               | <b>NA-NH<sub>3</sub></b>                         | 409.3               | <b>TLVI-H<sub>2</sub>O</b>                       | 735.3 | <b>SNiv-H<sub>2</sub>O</b>      | 964.4               | <b>b<sub>7</sub>-H<sub>2</sub>O</b>   | 1391.7 | <b>NivATS GTLVI-NH<sub>3</sub></b>   |
| 171.1               | <b>TS-H<sub>2</sub>O</b>                         | 412.3               | <b>LVIN-28</b>                                   | 736.3 | <b>SNiv-NH<sub>3</sub></b>      | 965.4               | <b>b<sub>7</sub>-NH<sub>3</sub></b>   | 1394.7 | <b>a<sub>12</sub>-NH<sub>3</sub></b> |
| 173.1               | <b>AT</b>                                        | 418.2               | <b>ATSGT</b>                                     | 737.3 | <b>vATSG-H<sub>2</sub>O</b>     | 965.4               | <b>NivATS G-NH<sub>3</sub></b>        | 1408.7 | <b>IvATSG TLVIN</b>                  |

|                     |                                                  |                     |                                                               |                     |                                                               |        |                                      |        |                                      |
|---------------------|--------------------------------------------------|---------------------|---------------------------------------------------------------|---------------------|---------------------------------------------------------------|--------|--------------------------------------|--------|--------------------------------------|
| 174.1               | <b>SN-28</b>                                     | 423.3               | <b>LVIN-NH<sub>3</sub></b>                                    | 737.3               | <b>NivA</b>                                                   | 969.4  | <b>vATSGT L</b>                      | 1408.7 | <b>NivATS GTLVI</b>                  |
| 184.1               | <b>SN-H<sub>2</sub>O</b>                         | 427.3               | <b>TLVI</b>                                                   | 738.4               | <b>SGTLVI NA-H<sub>2</sub>O</b>                               | 969.4  | <b>IvATSG T</b>                      | 1411.7 | <b>a<sub>12</sub></b>                |
| 185.1               | <b>SN-NH<sub>3</sub></b>                         | 428.3               | <b>y<sub>4</sub>-NH<sub>3</sub></b>                           | 739.4               | <b>SGTLVI NA-NH<sub>3</sub></b>                               | 982.4  | <b>NivATS G</b>                      | 1421.7 | <b>b<sub>12</sub>-H<sub>2</sub>O</b> |
| 185.2               | <b>LV-28</b>                                     | 430.3               | <b>SGTLV-28</b>                                               | 740.5               | <b>y<sub>7</sub>-H<sub>2</sub>O</b>                           | 982.4  | <b>b<sub>7</sub></b>                 | 1422.6 | <b>b<sub>12</sub>-NH<sub>3</sub></b> |
| 185.2               | <b>VI-28</b>                                     | 432.2               | <b>TSGTL-28</b>                                               | 741.5               | <b>y<sub>7</sub>-NH<sub>3</sub></b>                           | 984.4  | <b>SNivAT S-28</b>                   | 1439.7 | <b>b<sub>12</sub></b>                |
| 186.1               | <b>NA</b>                                        | 440.3               | <b>SGTLV-H<sub>2</sub>O</b>                                   | 743.4               | <b>ATSGT LVI</b>                                              | 985.6  | <b>y<sub>10</sub>-H<sub>2</sub>O</b> | 1451.7 | <b>IvATSG TLVINA-28</b>              |
| 187.1               | <b>TL-28</b>                                     | 440.3               | <b>LVIN</b>                                                   | 747.9 <sup>+2</sup> | <b>y<sub>12</sub><sup>-</sup>-H<sub>2</sub>O<sup>+2</sup></b> | 986.6  | <b>y<sub>10</sub>-NH<sub>3</sub></b> | 1461.7 | <b>IvATSG TLVINA-H<sub>2</sub>O</b>  |
| 189.1               | <b>TS</b>                                        | 442.2               | <b>TSGTL-H<sub>2</sub>O</b>                                   | 748.4 <sup>+2</sup> | <b>y<sub>12</sub><sup>-</sup>-NH<sub>3</sub><sup>+2</sup></b> | 994.4  | <b>SNivAT S-H<sub>2</sub>O</b>       | 1462.7 | <b>IvATSG TLVINA-NH<sub>3</sub></b>  |
| 197.1               | <b>TL-H<sub>2</sub>O</b>                         | 442.8 <sup>+2</sup> | <b>y<sub>9</sub>-H<sub>2</sub>O<sup>+2</sup></b>              | 753.3               | <b>SNiv</b>                                                   | 995.4  | <b>SNivAT S-NH<sub>3</sub></b>       | 1467.7 | <b>SNivAT SGTLVI-28</b>              |
| 200.1               | <b>IN-28</b>                                     | 443.3 <sup>+2</sup> | <b>y<sub>9</sub>-NH<sub>3</sub><sup>+2</sup></b>              | 755.3               | <b>vATSG</b>                                                  | 1003.6 | <b>y<sub>10</sub></b>                | 1477.7 | <b>SNivAT SGTLVI-H<sub>2</sub>O</b>  |
| 200.1               | <b>NI-28</b>                                     | 445.3               | <b>y<sub>4</sub></b>                                          | 756.4               | <b>SGTLVI NA</b>                                              | 1012.4 | <b>SNivAT S</b>                      | 1478.7 | <b>SNivAT SGTLVI-NH<sub>3</sub></b>  |
| 201.1               | <b>y<sub>2</sub>-NH<sub>3</sub></b>              | 451.8 <sup>+2</sup> | <b>y<sub>9</sub><sup>+2</sup></b>                             | 756.9 <sup>+2</sup> | <b>y<sub>12</sub><sup>+2</sup></b>                            | 1024.4 | <b>a<sub>8</sub>-NH<sub>3</sub></b>  | 1479.7 | <b>IvATSG TLVINA</b>                 |
| 202.1               | <b>SN</b>                                        | 456.3               | <b>GTLVI-28</b>                                               | 758.4               | <b>TSGTLV IN-28</b>                                           | 1040.5 | <b>vATSGT LV-28</b>                  | 1494.8 | <b>NivATS GTLVIN-28</b>              |
| 211.1               | <b>IN-NH<sub>3</sub></b>                         | 458.3               | <b>SGTLV</b>                                                  | 758.5               | <b>y<sub>7</sub></b>                                          | 1041.5 | <b>SNivAT SG-28</b>                  | 1494.8 | <b>y<sub>12</sub>-H<sub>2</sub>O</b> |
| 211.1               | <b>NI-NH<sub>3</sub></b>                         | 460.2               | <b>TSGTL</b>                                                  | 765.3               | <b>a<sub>5</sub>-NH<sub>3</sub></b>                           | 1041.5 | <b>a<sub>8</sub></b>                 | 1495.7 | <b>SNivAT SGTLVI</b>                 |
| 213.2               | <b>VI</b>                                        | 466.3               | <b>GTLVI-H<sub>2</sub>O</b>                                   | 768.4               | <b>TSGTLV IN-H<sub>2</sub>O</b>                               | 1050.5 | <b>vATSGT LV-H<sub>2</sub>O</b>      | 1495.7 | <b>y<sub>12</sub>-NH<sub>3</sub></b> |
| 213.2               | <b>LV</b>                                        | 482.2               | <b>vA-28</b>                                                  | 769.4               | <b>TSGTLV IN-NH<sub>3</sub></b>                               | 1051.4 | <b>b<sub>8</sub>-H<sub>2</sub>O</b>  | 1504.7 | <b>NivATS GTLVIN-H<sub>2</sub>O</b>  |
| 214.1               | <b>a<sub>3</sub>-NH<sub>3</sub></b>              | 483.3               | <b>LVINA-28</b>                                               | 782.3               | <b>a<sub>5</sub></b>                                          | 1051.4 | <b>SNivAT SG-H<sub>2</sub>O</b>      | 1505.7 | <b>NivATS GTLVIN-NH<sub>3</sub></b>  |
| 214.6 <sup>+2</sup> | <b>y<sub>4</sub>-NH<sub>3</sub><sup>+2</sup></b> | 484.3               | <b>GTLVI</b>                                                  | 783.4               | <b>IvATS-28</b>                                               | 1052.4 | <b>SNivAT SG-NH<sub>3</sub></b>      | 1507.7 | <b>a<sub>13</sub>-NH<sub>3</sub></b> |
| 215.1               | <b>TL</b>                                        | 493.3 <sup>+2</sup> | <b>y<sub>10</sub><sup>-</sup>-H<sub>2</sub>O<sup>+2</sup></b> | 786.4               | <b>TSGTLV IN</b>                                              | 1052.4 | <b>b<sub>8</sub>-NH<sub>3</sub></b>  | 1512.8 | <b>y<sub>12</sub></b>                |
| 218.1               | <b>SGT-28</b>                                    | 493.8 <sup>+2</sup> | <b>y<sub>10</sub><sup>-</sup>-NH<sub>3</sub><sup>+2</sup></b> | 792.3               | <b>b<sub>5</sub>-H<sub>2</sub>O</b>                           | 1054.5 | <b>IvATSG TL-28</b>                  | 1522.7 | <b>NivATS GTLVIN</b>                 |
| 218.1               | <b>TSG-28</b>                                    | 494.3               | <b>LVINA-NH<sub>3</sub></b>                                   | 793.3               | <b>b<sub>5</sub>-NH<sub>3</sub></b>                           | 1055.5 | <b>NivATS GT-28</b>                  | 1524.8 | <b>a<sub>13</sub></b>                |
| 218.1               | <b>y<sub>2</sub></b>                             | 502.3 <sup>+2</sup> | <b>y<sub>10</sub><sup>+2</sup></b>                            | 793.3               | <b>IvATS-H<sub>2</sub>O</b>                                   | 1056.6 | <b>y<sub>11</sub>-H<sub>2</sub>O</b> | 1534.7 | <b>b<sub>13</sub>-H<sub>2</sub>O</b> |

|                     |                                                  |                     |                                                               |                     |                                                               |        |                                      |        |                                        |
|---------------------|--------------------------------------------------|---------------------|---------------------------------------------------------------|---------------------|---------------------------------------------------------------|--------|--------------------------------------|--------|----------------------------------------|
| 223.1 <sup>+2</sup> | <b>y<sub>4</sub><sup>+2</sup></b>                | 503.3               | <b>ATSGT L-28</b>                                             | 796.4               | <b>SNivA-28</b>                                               | 1057.6 | <b>y<sub>11</sub>-NH<sub>3</sub></b> | 1535.7 | <b>b<sub>13</sub>-NH<sub>3</sub></b>   |
| 228.1               | <b>SGT-H<sub>2</sub>O</b>                        | 510.2               | <b>vA</b>                                                     | 797.5               | <b>y<sub>8</sub>-H<sub>2</sub>O</b>                           | 1064.5 | <b>IvATSG TL-H<sub>2</sub>O</b>      | 1552.8 | <b>b<sub>13</sub></b>                  |
| 228.1               | <b>TSG-H<sub>2</sub>O</b>                        | 511.3               | <b>LVINA</b>                                                  | 798.5               | <b>y<sub>8</sub>-NH<sub>3</sub></b>                           | 1065.5 | <b>NivATS GT-H<sub>2</sub>O</b>      | 1565.8 | <b>NivATS GTLVIN A-28</b>              |
| 228.1               | <b>IN</b>                                        | 513.3               | <b>ATSGT L-H<sub>2</sub>O</b>                                 | 804.4 <sup>+2</sup> | <b>y<sub>13</sub><sup>-</sup>-H<sub>2</sub>O<sup>+2</sup></b> | 1066.4 | <b>NivATS GT-NH<sub>3</sub></b>      | 1575.8 | <b>NivATS GTLVIN A-H<sub>2</sub>O</b>  |
| 228.1               | <b>NI</b>                                        | 513.3               | <b>TLVIN-28</b>                                               | 804.9 <sup>+2</sup> | <b>y<sub>13</sub><sup>-</sup>-NH<sub>3</sub><sup>+2</sup></b> | 1068.5 | <b>vATSGT LV</b>                     | 1576.8 | <b>NivATS GTLVIN A-NH<sub>3</sub></b>  |
| 231.1               | <b>a<sub>3</sub></b>                             | 523.3               | <b>TLVIN-H<sub>2</sub>O</b>                                   | 806.3               | <b>SNivA-H<sub>2</sub>O</b>                                   | 1069.5 | <b>b<sub>8</sub></b>                 | 1581.8 | <b>SNivAT SGTLVI N-28</b>              |
| 232.1               | <b>ATS-28</b>                                    | 524.2               | <b>Iv-28</b>                                                  | 807.3               | <b>SNivA-NH<sub>3</sub></b>                                   | 1069.5 | <b>SNivAT SG</b>                     | 1591.8 | <b>SNivAT SGTLVI N-H<sub>2</sub>O</b>  |
| 241.1               | <b>b<sub>3</sub>-H<sub>2</sub>O</b>              | 524.3               | <b>TLVIN-NH<sub>3</sub></b>                                   | 810.3               | <b>b<sub>5</sub></b>                                          | 1074.6 | <b>y<sub>11</sub></b>                | 1592.8 | <b>SNivAT SGTLVI N-NH<sub>3</sub></b>  |
| 242.1               | <b>b<sub>3</sub>-NH<sub>3</sub></b>              | 527.3               | <b>y<sub>5</sub>-NH<sub>3</sub></b>                           | 810.4               | <b>NivAT-28</b>                                               | 1081.5 | <b>a<sub>9</sub>-NH<sub>3</sub></b>  | 1593.8 | <b>NivATS GTLVIN A</b>                 |
| 242.1               | <b>ATS-H<sub>2</sub>O</b>                        | 528.8 <sup>+2</sup> | <b>y<sub>11</sub><sup>-</sup>-H<sub>2</sub>O<sup>+2</sup></b> | 811.4               | <b>IvATS</b>                                                  | 1082.5 | <b>IvATSG TL</b>                     | 1607.8 | <b>y<sub>13</sub>-H<sub>2</sub>O</b>   |
| 244.2               | <b>GTL-28</b>                                    | 529.3 <sup>+2</sup> | <b>y<sub>11</sub><sup>-</sup>-NH<sub>3</sub><sup>+2</sup></b> | 813.4 <sup>+2</sup> | <b>y<sub>13</sub><sup>+2</sup></b>                            | 1083.5 | <b>NivATS GT</b>                     | 1608.8 | <b>y<sub>13</sub>-NH<sub>3</sub></b>   |
| 246.1               | <b>SGT</b>                                       | 531.3               | <b>ATSGT L</b>                                                | 815.5               | <b>y<sub>8</sub></b>                                          | 1098.5 | <b>a<sub>9</sub></b>                 | 1609.8 | <b>SNivAT SGTLVI N</b>                 |
| 246.1               | <b>TSG</b>                                       | 531.3               | <b>TSGTLV-28</b>                                              | 820.4               | <b>NivAT-H<sub>2</sub>O</b>                                   | 1108.5 | <b>b<sub>9</sub>-H<sub>2</sub>O</b>  | 1621.8 | <b>a<sub>14</sub>-NH<sub>3</sub></b>   |
| 254.1               | <b>GTL-H<sub>2</sub>O</b>                        | 537.8 <sup>+2</sup> | <b>y<sub>11</sub><sup>+2</sup></b>                            | 821.3               | <b>NivAT-NH<sub>3</sub></b>                                   | 1109.4 | <b>b<sub>9</sub>-NH<sub>3</sub></b>  | 1625.8 | <b>y<sub>13</sub></b>                  |
| 259.1               | <b>b<sub>3</sub></b>                             | 541.3               | <b>TSGTLV-H<sub>2</sub>O</b>                                  | 824.4               | <b>SNivA</b>                                                  | 1126.5 | <b>b<sub>9</sub></b>                 | 1638.8 | <b>a<sub>14</sub></b>                  |
| 260.1               | <b>ATS</b>                                       | 541.3               | <b>TLVIN</b>                                                  | 828.3               | <b>vATSGT-28</b>                                              | 1142.5 | <b>SNivAT SGT-28</b>                 | 1648.8 | <b>b<sub>14</sub>-H<sub>2</sub>O</b>   |
| 264.2 <sup>+2</sup> | <b>y<sub>5</sub>-NH<sub>3</sub><sup>+2</sup></b> | 543.4               | <b>SGTLVI-28</b>                                              | 829.5               | <b>TSGTLV INA-28</b>                                          | 1152.5 | <b>SNivAT SGT-H<sub>2</sub>O</b>     | 1649.8 | <b>b<sub>14</sub>-NH<sub>3</sub></b>   |
| 271.2               | <b>INA-28</b>                                    | 544.3               | <b>y<sub>5</sub></b>                                          | 829.5               | <b>ATSGT LVIN-28</b>                                          | 1153.5 | <b>SNivAT SGT-NH<sub>3</sub></b>     | 1652.8 | <b>SNivAT SGTLVI NA-28</b>             |
| 272.2               | <b>GTL</b>                                       | 552.2               | <b>Iv</b>                                                     | 836.4               | <b>a<sub>6</sub>-NH<sub>3</sub></b>                           | 1153.6 | <b>vATSGT LVI-28</b>                 | 1662.8 | <b>SNivAT SGTLVI NA-H<sub>2</sub>O</b> |
| 272.7 <sup>+2</sup> | <b>y<sub>5</sub><sup>+2</sup></b>                | 553.3               | <b>SGTLVI-H<sub>2</sub>O</b>                                  | 838.3               | <b>vATSGT-H<sub>2</sub>O</b>                                  | 1153.6 | <b>IvATSG TLV-28</b>                 | 1663.8 | <b>SNivAT SGTLVI NA-NH<sub>3</sub></b> |
| 282.1               | <b>INA-NH<sub>3</sub></b>                        | 559.3               | <b>TSGTLV</b>                                                 | 838.4               | <b>NivAT</b>                                                  | 1163.6 | <b>vATSGT LVI-H<sub>2</sub>O</b>     | 1666.8 | <b>b<sub>14</sub></b>                  |

|       |                                     |       |                                |                     |                                                   |        |                                      |        |                                      |
|-------|-------------------------------------|-------|--------------------------------|---------------------|---------------------------------------------------|--------|--------------------------------------|--------|--------------------------------------|
| 286.2 | <b>TLV-28</b>                       | 570.4 | <b>GTLVIN-28</b>               | 839.5               | <b>ATSGT LVIN-H<sub>2</sub>O</b>                  | 1163.6 | <b>IvATSG TLV-H<sub>2</sub>O</b>     | 1680.8 | <b>SNivAT SGTLVINA</b>               |
| 287.2 | <b>SNI-28</b>                       | 571.3 | <b>SGTLVI</b>                  | 839.5               | <b>TSGTLV INA-H<sub>2</sub>O</b>                  | 1168.6 | <b>NivATS GTL-28</b>                 | 1692.8 | <b>a<sub>15</sub>-NH<sub>3</sub></b> |
| 289.2 | <b>ATSG-28</b>                      | 580.3 | <b>GTLVIN-H<sub>2</sub>O</b>   | 840.4               | <b>IvATSG-28</b>                                  | 1170.5 | <b>SNivAT SGT</b>                    | 1709.8 | <b>a<sub>15</sub></b>                |
| 296.2 | <b>TLV-H<sub>2</sub>O</b>           | 581.3 | <b>GTLVIN-NH<sub>3</sub></b>   | 840.4               | <b>ATSGT LVIN-NH<sub>3</sub></b>                  | 1178.5 | <b>NivATS GTL-H<sub>2</sub>O</b>     | 1719.8 | <b>b<sub>15</sub>-H<sub>2</sub>O</b> |
| 297.2 | <b>SNI-H<sub>2</sub>O</b>           | 583.2 | <b>vAT-28</b>                  | 840.4               | <b>TSGTLV INA-NH<sub>3</sub></b>                  | 1179.5 | <b>NivATS GTL-NH<sub>3</sub></b>     | 1720.8 | <b>b<sub>15</sub>-NH<sub>3</sub></b> |
| 298.1 | <b>SNI-NH<sub>3</sub></b>           | 584.4 | <b>TLVINA-28</b>               | 850.4               | <b>IvATSG-H<sub>2</sub>O</b>                      | 1181.6 | <b>vATSGT LVI</b>                    | 1721.9 | <b>y<sub>14</sub>-H<sub>2</sub>O</b> |
| 298.2 | <b>LVI-28</b>                       | 593.2 | <b>vAT-H<sub>2</sub>O</b>      | 853.4               | <b>a<sub>6</sub></b>                              | 1181.6 | <b>IvATSG TLV</b>                    | 1722.9 | <b>y<sub>14</sub>-NH<sub>3</sub></b> |
| 299.1 | <b>ATSG-H<sub>2</sub>O</b>          | 594.4 | <b>TLVINA-H<sub>2</sub>O</b>   | 856.3               | <b>vATSGT</b>                                     | 1182.5 | <b>a<sub>10</sub>-NH<sub>3</sub></b> | 1737.8 | <b>b<sub>15</sub></b>                |
| 299.2 | <b>INA</b>                          | 595.3 | <b>IvA-28</b>                  | 857.5               | <b>TSGTLV INA</b>                                 | 1196.6 | <b>NivATS GTL</b>                    | 1739.9 | <b>y<sub>14</sub></b>                |
| 299.2 | <b>VIN-28</b>                       | 595.3 | <b>TLVINA-NH<sub>3</sub></b>   | 857.5               | <b>ATSGT LVIN</b>                                 | 1199.5 | <b>a<sub>10</sub></b>                | 1808.9 | <b>y<sub>15</sub>-H<sub>2</sub>O</b> |
| 310.2 | <b>VIN-NH<sub>3</sub></b>           | 598.4 | <b>GTLVIN</b>                  | 861.4 <sup>+2</sup> | <b>y<sub>14</sub>-H<sub>2</sub>O<sup>+2</sup></b> | 1209.5 | <b>b<sub>10</sub>-H<sub>2</sub>O</b> | 1809.9 | <b>y<sub>15</sub>-NH<sub>3</sub></b> |
| 314.2 | <b>TLV</b>                          | 602.4 | <b>ATSGT LV-28</b>             | 861.9 <sup>+2</sup> | <b>y<sub>14</sub>-NH<sub>3</sub><sup>+2</sup></b> | 1210.5 | <b>b<sub>10</sub>-NH<sub>3</sub></b> | 1826.9 | <b>y<sub>15</sub></b>                |
| 315.2 | <b>y<sub>3</sub>-NH<sub>3</sub></b> | 611.2 | <b>vAT</b>                     | 863.4               | <b>b<sub>6</sub>-H<sub>2</sub>O</b>               | 1227.5 | <b>b<sub>10</sub></b>                | 1865.9 | <b>MH-H<sub>2</sub>O</b>             |
| 315.2 | <b>SNI</b>                          | 612.3 | <b>ATSGT LV-H<sub>2</sub>O</b> | 864.3               | <b>b<sub>6</sub>-NH<sub>3</sub></b>               | 1255.6 | <b>SNivAT SGTL-28</b>                | 1866.9 | <b>MH-NH<sub>3</sub></b>             |
| 317.1 | <b>ATSG</b>                         | 612.4 | <b>TLVINA</b>                  | 868.4               | <b>IvATSG</b>                                     | 1265.6 | <b>SNivAT SGTL-H<sub>2</sub>O</b>    | 1883.9 | <b>MH</b>                            |
